# Supplementary material
Source: MDPI journal article supplement (https://www.mdpi.com/1999-4907/11/11/1153)
Supplement: s1 [file s1]

Article

# Linking Tree Health, Rhizosphere Physicochemical Properties, and Microbiome in Acute Oak Decline

**Diogo Pinho** <sup>1,2,\*</sup>, **Cristina Barroso** <sup>1,3</sup>, **Hugo Froufe** <sup>1</sup>, **Nathan Brown** <sup>4</sup>, **Elena Vanguelova** <sup>4</sup>, **Conceição Egas** <sup>1,3</sup> and **Sandra Denman** <sup>4,\*</sup>

<sup>1</sup> Next Generation Sequencing Unit, UC-Biotech, Biocant Park, Núcleo 04 Lote 8, 3060-197 Cantanhede, Portugal; diogo.pinho@biocant.pt (C.B.); hugo.froufe@biocant.pt (H.F.); cegas@biocant.pt (C.E.)

<sup>2</sup> Department of Biology and CESAM, University of Aveiro, Campus Santiago, 3810-193 Aveiro, Portugal

<sup>3</sup> Center for Neuroscience and Cell Biology, University of Coimbra, Rua Larga Faculdade de Medicina, Pólo I, 1st floor, 3004-504 Coimbra, Portugal

<sup>4</sup> Forest Research, Centre for Ecology, Biosecurity and Society, Farnham, Surrey GU10 4LH, UK; nathan@woodlandheritage.org (N.B.); elena.vanguelova@forestresearch.gov.uk (E.V.)

\* Correspondence: diogo.pinho@biocant.pt (D.P.), sandra.denman@forestresearch.gov.uk (S.D.); Sandra Denman Tel.: +44-(0)-300-067-5640

Received: 27 September 2020; Accepted: 29 October 2020; Published: date

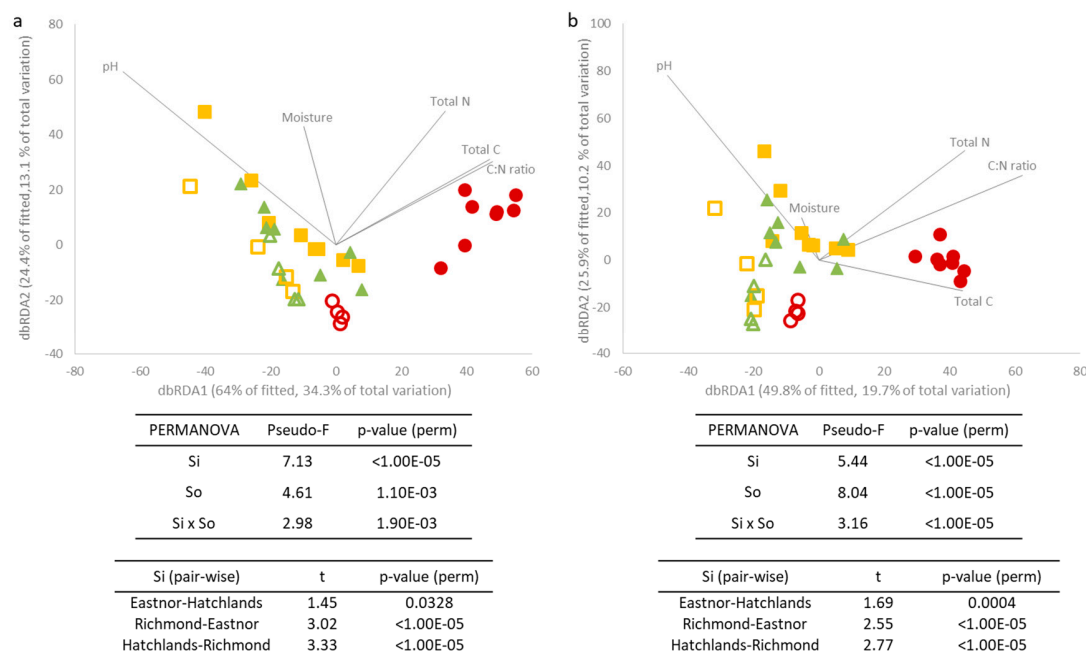

**Figure S1** Distance-based redundancy analysis of the (a) bacterial and (b) fungal communities and soil properties of the rhizosphere and bulk soil across the sites ( $n = 36$ ). The longer the line, the stronger the correlation between microbiome composition and soil chemistry. Eastnor—green triangle; Hatchlands—yellow square; Richmond—red circle; filled symbol—rhizosphere; open symbol—bulk soil. PERMANOVA results are shown in the below tables. Si—site; So—Soil compartment.

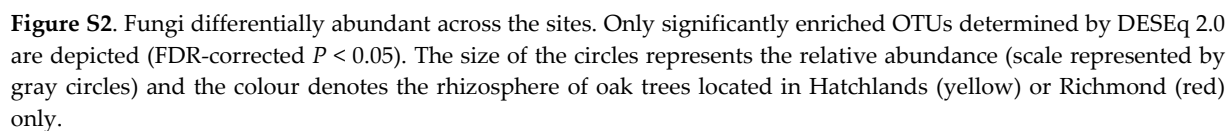

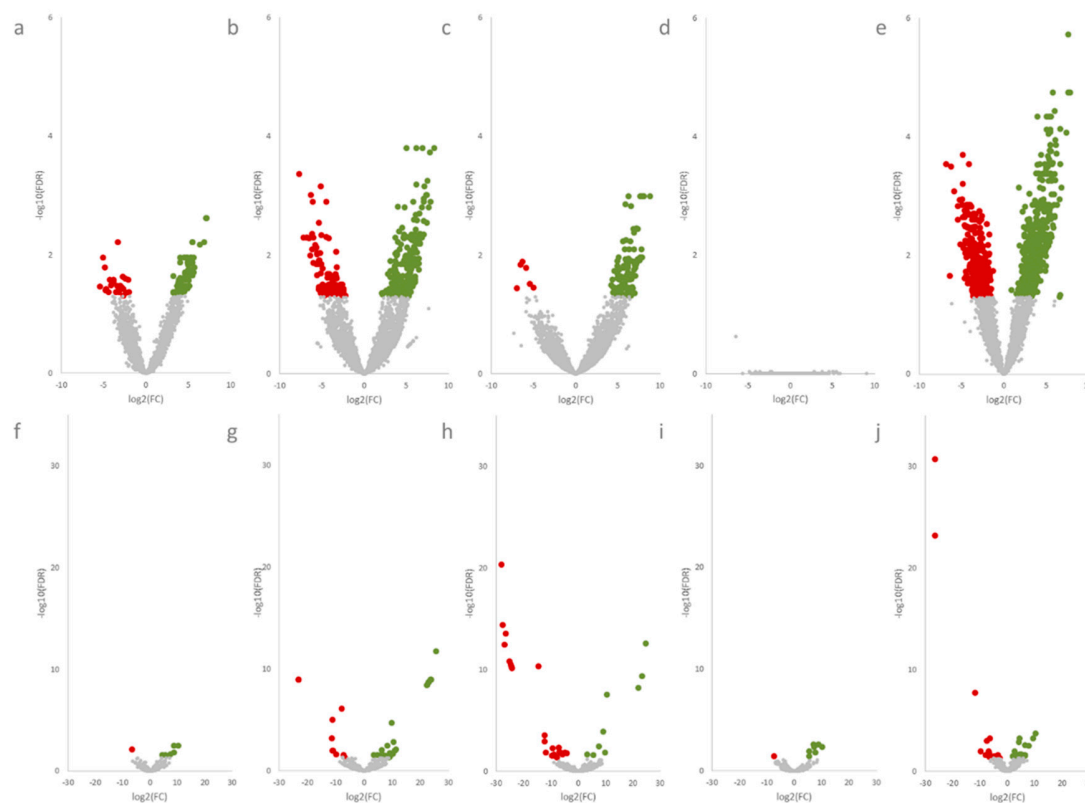

**Figure S3.** Volcano plots of differential bacterial (a, b, c, d, and e) and fungal (f, g, h, i and j) OTU abundance analysis as calculated by DESeq 2.0 according to tree health condition. Fold change as FDR corrected p-values are plotted for each OTU. Significantly different taxa (FDR-corrected  $P < 0.05$ ) are coloured according to tree health condition: healthy–green (positive  $\log_2$  (FC) axis), AOD–red (negative  $\log_2$  (FC) axis). All sites (a, f) Eastnor (b, g); Hatchlands (c, h); Richmond (d, i); Eastnor and Hatchlands (e, j).

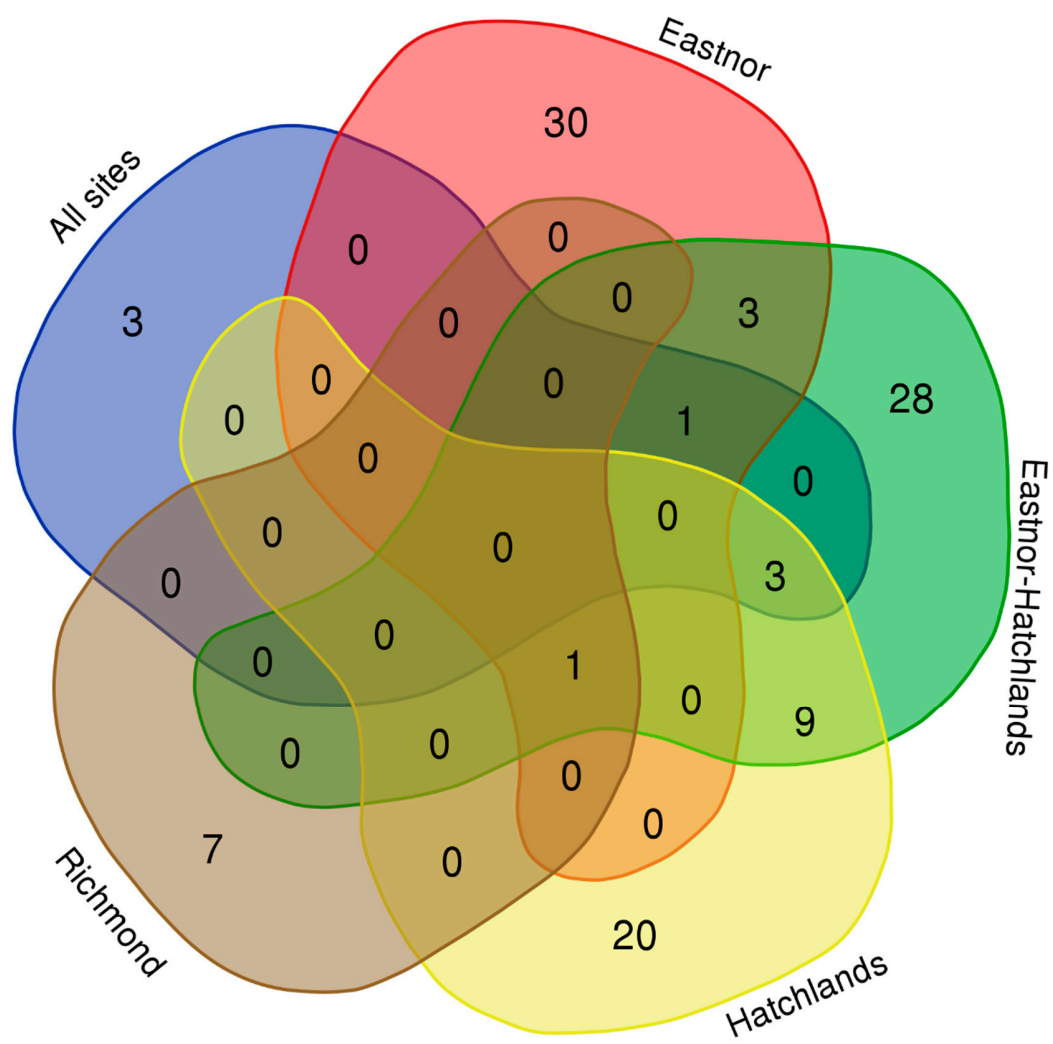

**Figure S4.** Venn diagram of the intersection of the differentially abundant fungal OTUs between healthy and AOD trees detected across the tree health comparisons.

**Table S1** Physicochemical properties according to soil compartment.

| Site       | AOD stage | Soil Compartment | Moisture (%) * | pH (H <sub>2</sub> O) *** | Total C (mg/kg) *** | Total N (mg/kg) *** | C:N ratio ***   |
|------------|-----------|------------------|----------------|---------------------------|---------------------|---------------------|-----------------|
| Eastnor    | Low       | Rhizosphere      | 25 ± 6 ab      | 5.68 ± 0.49 ac            | 60,740 ± 11,450 a   | 4,629 ± 651 a       | 13.04 ± 1.06 ad |
|            |           | Bulk soil        | 28 ± 2 b       | 5.62 ± 0.26 a             | 34,401 ± 5,065 bd   | 2,908 ± 376 b       | 11.81 ± 0.64 bd |
| Hatchlands | Mid       | Rhizosphere      | 22 ± 3 a       | 5.92 ± 0.73 a             | 64,216 ± 9,660 a    | 4,581 ± 793 a       | 14.08 ± 0.80 a  |
|            |           | Bulk soil        | 29 ± 4 b       | 5.93 ± 0.47 a             | 42,666 ± 8,150 b    | 3,860 ± 931 ab      | 11.17 ± 0.54 b  |
| Richmond   | Severe    | Rhizosphere      | 27 ± 6 ab      | 4.33 ± 0.14 b             | 225,966 ± 55,586 c  | 12,921 ± 3,331 c    | 17.56 ± 0.55 c  |
|            |           | Bulk soil        | 15 ± 3 c       | 5.12 ± 0.07 c             | 27,328 ± 847 d      | 2,064 ± 102 d       | 13.25 ± 0.28 ad |

Mean values of soil physicochemical parameters ± standard deviation are shown ( $n = 36$ ). Asterisks and letters indicate significant differences as determined by statistical analysis (\* for  $P < 0.05$ ; \*\* for  $P < 0.01$ ; \*\*\* for  $P < 0.001$ ).

**Table S2** Microbial alpha diversity and total abundance according to soil compartment across the sites.

| Microbial Group | Site       | AOD stage | Soil Compartment | Chao 1         | Observed Species | Shannon        | Evenness       | Simpson          | Total abundance |
|-----------------|------------|-----------|------------------|----------------|------------------|----------------|----------------|------------------|-----------------|
| Bacteria        | Eastnor    | Low       | Rhizosphere      | 7,840 ± 804 a  | 4,234 ± 492 a    | 9.92 ± 0.37 a  | 0.82 ± 0.02 a  | 0.996 ± 0.001 ab | 11.02 ± 0.11 a  |
|                 |            |           | Bulk soil        | 7,506 ± 412 ad | 4,143 ± 392 a    | 9.97 ± 0.31 a  | 0.83 ± 0.02 a  | 0.997 ± 0.001 a  | 10.92 ± 0.10 a  |
|                 | Hatchlands | Mid       | Rhizosphere      | 7,721 ± 682 a  | 4,326 ± 426 a    | 10.06 ± 0.31 a | 0.83 ± 0.02 a  | 0.997 ± 0.001 a  | 11.08 ± 0.05 a  |
|                 |            |           | Bulk soil        | 6,396 ± 229 b  | 3,519 ± 212 ab   | 9.51 ± 0.24 ab | 0.81 ± 0.01 ab | 0.995 ± 0.001 b  | 10.94 ± 0.14 a  |
|                 | Richmond   | Severe    | Rhizosphere      | 5,478 ± 746 c  | 2,996 ± 441 b    | 8.77 ± 0.42 c  | 0.76 ± 0.02 c  | 0.988 ± 0.004 c  | 11.09 ± 0.05 a  |
|                 |            |           | Bulk soil        | 6,618 ± 338 bd | 3,598 ± 226 ab   | 9.17 ± 0.20 bc | 0.78 ± 0.01 bc | 0.990 ± 0.004 c  | 11.00 ± 0.05 a  |
| Fungi           | Eastnor    | Low       | Rhizosphere      | 1,187 ± 190 a  | 875 ± 152 a      | 6.77 ± 0.43 ab | 0.69 ± 0.03 ab | 0.974 ± 0.008 ab | 9.08 ± 0.20 bc  |
|                 |            |           | Bulk soil        | 1,062 ± 141 ac | 807 ± 107 ab     | 6.46 ± 0.20 ab | 0.67 ± 0.01 ab | 0.966 ± 0.008 ab | 8.87 ± 0.06 ac  |
|                 | Hatchlands | Mid       | Rhizosphere      | 1,125 ± 97 a   | 883 ± 70 a       | 6.94 ± 0.32 a  | 0.71 ± 0.03 a  | 0.976 ± 0.006 a  | 8.92 ± 0.26 abc |
|                 |            |           | Bulk soil        | 853 ± 130 b    | 710 ± 90 ab      | 6.44 ± 0.40 ab | 0.68 ± 0.03 ab | 0.959 ± 0.016 ab | 8.64 ± 0.16 a   |
|                 | Richmond   | Severe    | Rhizosphere      | 1,140 ± 102 a  | 767 ± 43 ab      | 6.27 ± 0.25 b  | 0.65 ± 0.02 b  | 0.961 ± 0.018 b  | 9.46 ± 0.15 d   |
|                 |            |           | Bulk soil        | 896 ± 74 bc    | 674 ± 60 b       | 6.52 ± 0.29 ab | 0.69 ± 0.02 ab | 0.970 ± 0.011 ab | 9.00 ± 0.07 b   |

Mean values ± standard deviation are shown ( $n = 36$ ). Chao1 and Observed species (expressed as number of OTUs) indicate species richness. Pielou's Evenness, Shannon, and Simpson indexes indicate species diversity. Total abundance (qPCR) is expressed as log copy number of 16S or ITS genetic markers/g of soil. Significant differences ( $P < 0.05$ ) are indicated by letters. The statistical analyses were performed for bacterial and fungal communities separately.

**Table S5** Microbial alpha diversity and total abundance of the oak rhizosphere soils across the sites and tree health conditions.

| Microbial Group | Site       | AOD stage | Tree health condition | Chao 1         | Observed Species | Shannon         | Evenness       | Simpson          | Total abundance |
|-----------------|------------|-----------|-----------------------|----------------|------------------|-----------------|----------------|------------------|-----------------|
| Bacteria        | Eastnor    | Low       | Healthy               | 8,358 ± 804 a  | 4,566 ± 477 a    | 10.14 ± 0.39 a  | 0.83 ± 0.02 a  | 0.997 ± 0.001 ab | 11.11 ± 0.05 ab |
|                 |            |           | AOD                   | 7,323 ± 334 ac | 3,903 ± 191 ab   | 9.70 ± 0.16 a   | 0.81 ± 0.01 a  | 0.996 ± 0.001 b  | 10.93 ± 0.07 c  |
|                 | Hatchlands | Mid       | Healthy               | 7,974 ± 466 a  | 4,570 ± 319 a    | 10.30 ± 0.25 a  | 0.85 ± 0.01 a  | 0.997 ± 0.001 a  | 11.11 ± 0.05 a  |
|                 |            |           | AOD                   | 7,469 ± 766 a  | 4,082 ± 377 a    | 9.82 ± 0.12 a   | 0.82 ± 0.00 a  | 0.996 ± 0.000 b  | 10.93 ± 0.07 b  |
|                 | Richmond   | Severe    | Healthy               | 5,292 ± 765 b  | 2,950 ± 371 b    | 8.73 ± 0.23 b   | 0.76 ± 0.01 b  | 0.988 ± 0.002 c  | 11.04 ± 0.03 b  |
|                 |            |           | AOD                   | 5,664 ± 677 bc | 3,041 ± 498 b    | 8.81 ± 0.54 b   | 0.76 ± 0.03 b  | 0.988 ± 0.005 c  | 11.13 ± 0.03 a  |
|                 | Eastnor    | Low       | Healthy               | 1,181 ± 178 a  | 905 ± 128 a      | 6.84 ± 0.44 ab  | 0.70 ± 0.03 ab | 0.974 ± 0.010 a  | 9.03 ± 0.14 ab  |
|                 |            |           | AOD                   | 1,193 ± 201 a  | 844 ± 167 a      | 6.69 ± 0.40 abc | 0.69 ± 0.02 ab | 0.975 ± 0.010 a  | 9.13 ± 0.24 abc |
| Fungi           | Hatchlands | Mid       | Healthy               | 1,101 ± 77 a   | 915 ± 66 a       | 7.15 ± 0.24 a   | 0.73 ± 0.02 a  | 0.980 ± 0.004 a  | 8.71 ± 0.13 a   |
|                 |            |           | AOD                   | 1,149 ± 109 a  | 851 ± 57 a       | 6.72 ± 0.23 abc | 0.69 ± 0.02 ab | 0.973 ± 0.006 a  | 9.13 ± 0.16 abc |
|                 | Richmond   | Severe    | Healthy               | 1,173 ± 78 a   | 777 ± 40 a       | 6.20 ± 0.33 bc  | 0.65 ± 0.03 b  | 0.954 ± 0.022 a  | 9.49 ± 0.20 c   |
|                 |            |           | AOD                   | 1,108 ± 113 a  | 757 ± 44 a       | 6.34 ± 0.07 c   | 0.66 ± 0.01 b  | 0.969 ± 0.002 a  | 9.42 ± 0.06 bc  |

Mean values ± standard deviation are shown ( $n = 24$ ). Chao1 and Observed species (expressed as number of OTUs) indicate species richness. Pielou's Evenness, Shannon, and Simpson indexes indicate species diversity. Total abundance (qPCR) is expressed as log copy number of 16S or ITS genetic markers/g of soil. Significant differences ( $P < 0.05$ ) are indicated by letters. The statistical analyses were performed for bacterial and fungal communities separately.



**Table S6** PERMANOVA and pairwise comparison results of the comparison of the bacterial and fungal community according to site and tree health condition ( $n = 24$ ).

| Microbial Group | Factor              | Pseudo-F | P-value (perm)       |
|-----------------|---------------------|----------|----------------------|
| Bacteria        | Si                  | 10.53    | $< 1 \times 10^{-5}$ |
|                 | Tr                  | 3.37     | 0.0181               |
|                 | Si $\times$ Tr      | 1.51     | 0.1416               |
| Fungi           | Si                  | 6.43     | $< 1 \times 10^{-5}$ |
|                 | Tr                  | 1.90     | 0.0426               |
|                 | Si $\times$ Tr      | 1.29     | 0.1522               |
| Microbial Group | Pairwise            | <i>t</i> | P-value (perm)       |
| Bacteria        | Eastnor-Hatchlands  | 1.33     | 0.0791               |
|                 | Eastnor-Richmond    | 3.77     | $< 2 \times 10^{-5}$ |
|                 | Hatchlands-Richmond | 4.01     | $< 2 \times 10^{-5}$ |
|                 | Healthy-AOD (E)     | 2.85     | 0.0288               |
|                 | Healthy-AOD (H)     | 2.60     | 0.0357               |
|                 | Healthy-AOD (R)     | 0.81     | 0.9715               |
| Fungi           | Eastnor-Hatchlands  | 1.62     | 0.0003               |
|                 | Eastnor-Richmond    | 2.85     | $< 1 \times 10^{-5}$ |
|                 | Hatchlands-Richmond | 3.06     | $< 3 \times 10^{-5}$ |
|                 | Healthy-AOD (E)     | 1.80     | 0.0081               |
|                 | Healthy-AOD (H)     | 1.64     | 0.0421               |
|                 | Healthy-AOD (R)     | 1.07     | 0.3151               |

Si–Site; Tr–Tree health condition; E–Eastnor; H–Hatchlands; R–Richmond

**Table S7** Combinations of rhizosphere soil explanatory variables that best explain the variance in the rhizosphere microbiome ( $n = 24$ ).

| Microbial group | Environmental variable(s) (no. of variables) | Spearman's coefficient (rs)* |
|-----------------|----------------------------------------------|------------------------------|
| Bacteria        | pH, C, C:N (3)                               | 0.896                        |
|                 | pH (1)                                       | 0.895                        |
|                 | pH, C (2)                                    | 0.892                        |
|                 | pH, C:N (2)                                  | 0.892                        |
|                 | pH, N, C:N (3)                               | 0.889                        |
| Fungi           | pH, C:N (2)                                  | 0.848                        |
|                 | pH, C, C:N (3)                               | 0.827                        |
|                 | pH (1)                                       | 0.825                        |
|                 | pH, N, C:N (3)                               | 0.817                        |
|                 | pH, C (2)                                    | 0.799                        |

\* Significant differences ( $P < 0.01$ ) were obtained in all the combinations
