# Supplementary material
Source: MDPI journal article supplement (https://www.mdpi.com/1999-4907/11/11/1153)
Supplement: s1 [file s1]

Archive with 4 entries (4 files):
- Supplementary Material.pdf
- Table S3.xlsx
- Table S4.xlsx
- Table S8.xlsx
