# Supplementary material
Source: MDPI journal article supplement (https://www.mdpi.com/1999-4907/11/11/1153)
Supplement: s1 [file s1 › Table S3.xlsx]

## Sheet: Supplementary Table S3
Electronic Supplementary Material
Article title: Linking Tree Health, Rhizosphere Physicochemical Properties, and Microbiome in Acute Oak Decline
Journal name: Forests
Diogo Pinho1,2, Cristina Barroso1,3, Hugo Froufe1, Nathan Brown4, Elena Vanguelova4, Conceição Egas1,3, Sandra Denman4
1 Next Generation Sequencing Unit, UC-Biotech, Biocant Park, Núcleo 04 Lote 8, 3060-197 Cantanhede, Portugal
2 Department of Biology and CESAM, University of Aveiro, Campus Santiago, 3810-193 Aveiro, Portugal
3 Center for Neuroscience and Cell Biology, University of Coimbra, Rua Larga Faculdade de Medicina, Pólo I, 1st floor, 3004-504 Coimbra, Portugal
4 Forest Research, Centre for Ecology, Biosecurity and Society, Farnham, Surrey GU10 4LH, UK
Author for correspondence: Sandra Denman. Tel: +44 (0)300 067 5640. Email: sandra.denman@forestry.gsi.gov.uk
Supplementary Table S3 Bacterial OTU table

## Sheet: Table S3
OTU_ID	1H-E	2H-E	4H-E	5H-E	1AOD-E	2AOD-E	3AOD-E	4AOD-E	1B-E	2B-E	4B-E	5B-E	1H-H	3H-H	4H-H	5H-H	1AOD-H	2AOD-H	3AOD-H	5AOD-H	1B-H	2B-H	3B-H	4B-H	1H-R	2H-R	4H-R	5H-R	1AOD-R	2AOD-R	3AOD-R	5AOD-R	2B-R	3B-R	4B-R	5B-R	Kingdom	Phylum	Class	Order	Family	Genus	Species	OTU
OTU47925	5	1	4	2	0	0	0	0	0	0	0	7	5	11	14	1	0	0	1	5	1	0	0	10	0	0	0	0	0	0	0	0	0	0	0	0	k__Bacteria	p__unidentified_Bacteria	c__unidentified_Bacteria	o__uidentified	f__unidentified_Bacteria	g__unidentified_Bacteria	s__unidentified_Bacteria	New.CleanUp.ReferenceOTU223654
OTU33813	0	0	1	0	0	1	0	0	0	0	0	0	0	0	0	0	0	1	0	0	0	0	0	0	11	3	7	9	1	2	0	18	0	0	0	0	k__Bacteria	p__unidentified_Bacteria	c__unidentified_Bacteria	o__uidentified	f__unidentified_Bacteria	g__unidentified_Bacteria	s__unidentified_Bacteria	New.CleanUp.ReferenceOTU135438
OTU34488	0	0	0	0	0	0	0	0	0	0	0	0	0	0	0	0	0	0	0	0	0	0	0	0	6	3	0	0	3	0	17	1	0	0	0	0	k__Bacteria	p__unidentified_Bacteria	c__unidentified_Bacteria	o__uidentified	f__unidentified_Bacteria	g__unidentified_Bacteria	s__unidentified_Bacteria	New.CleanUp.ReferenceOTU139981
OTU58618	0	0	0	0	0	4	5	0	0	0	0	0	0	0	0	0	0	1	0	0	0	0	0	0	0	0	0	0	2	3	0	1	0	0	0	0	k__Bacteria	p__unidentified_Bacteria	c__unidentified_Bacteria	o__uidentified	f__unidentified_Bacteria	g__unidentified_Bacteria	s__unidentified_Bacteria	New.CleanUp.ReferenceOTU290034
OTU19132	0	0	0	0	0	0	0	0	0	0	0	0	0	0	0	0	0	0	0	0	0	0	0	0	0	0	3	8	0	0	2	1	0	0	0	1	k__Bacteria	p__unidentified_Bacteria	c__unidentified_Bacteria	o__uidentified	f__unidentified_Bacteria	g__unidentified_Bacteria	s__unidentified_Bacteria	New.CleanUp.ReferenceOTU40999
OTU14664	0	0	0	0	0	0	0	0	0	0	0	0	0	0	0	0	0	0	0	0	0	0	0	0	0	0	0	0	0	1	1	9	0	0	0	0	k__Bacteria	p__unidentified_Bacteria	c__unidentified_Bacteria	o__uidentified	f__unidentified_Bacteria	g__unidentified_Bacteria	s__unidentified_Bacteria	New.CleanUp.ReferenceOTU13902
OTU64041	0	0	0	0	0	0	0	0	0	0	0	0	0	0	0	0	0	0	0	0	0	0	0	0	0	3	0	0	0	0	0	0	0	0	0	0	k__Bacteria	p__unidentified_Bacteria	c__unidentified_Bacteria	o__uidentified	f__unidentified_Bacteria	g__unidentified_Bacteria	s__unidentified_Bacteria	New.CleanUp.ReferenceOTU324516
OTU37851	0	0	0	0	0	1	0	0	0	0	0	0	0	0	0	0	1	0	0	0	0	0	0	0	0	0	0	0	0	0	0	0	0	0	0	0	k__Bacteria	p__unidentified_Bacteria	c__unidentified_Bacteria	o__uidentified	f__unidentified_Bacteria	g__unidentified_Bacteria	s__unidentified_Bacteria	New.CleanUp.ReferenceOTU162126
OTU45587	0	0	0	0	0	0	0	0	0	0	0	0	0	0	0	0	0	0	0	1	0	1	0	0	0	0	0	0	0	0	0	0	0	0	0	0	k__Bacteria	p__unidentified_Bacteria	c__unidentified_Bacteria	o__uidentified	f__unidentified_Bacteria	g__unidentified_Bacteria	s__unidentified_Bacteria	New.CleanUp.ReferenceOTU209446
OTU53395	0	0	0	0	0	0	0	2	0	0	0	0	0	0	0	0	0	0	0	0	0	0	0	0	0	0	0	0	0	0	0	0	0	0	0	0	k__Bacteria	p__unidentified_Bacteria	c__unidentified_Bacteria	o__uidentified	f__unidentified_Bacteria	g__unidentified_Bacteria	s__unidentified_Bacteria	New.CleanUp.ReferenceOTU257268
OTU19432	0	0	0	0	0	0	0	0	0	0	0	0	0	0	0	1	0	0	0	0	0	0	0	0	0	0	0	0	0	0	0	0	0	0	0	0	k__Bacteria	p__unidentified_Bacteria	c__unidentified_Bacteria	o__uidentified	f__unidentified_Bacteria	g__unidentified_Bacteria	s__unidentified_Bacteria	New.CleanUp.ReferenceOTU42734
OTU23084	0	0	0	0	0	0	0	0	0	0	0	0	0	0	0	0	0	0	0	0	0	0	0	0	1	0	0	0	0	0	0	0	0	0	0	0	k__Bacteria	p__unidentified_Bacteria	c__unidentified_Bacteria	o__uidentified	f__unidentified_Bacteria	g__unidentified_Bacteria	s__unidentified_Bacteria	New.CleanUp.ReferenceOTU65683
OTU23821	0	0	0	0	1	0	0	0	0	0	0	0	0	0	0	0	0	0	0	0	0	0	0	0	0	0	0	0	0	0	0	0	0	0	0	0	k__Bacteria	p__unidentified_Bacteria	c__unidentified_Bacteria	o__uidentified	f__unidentified_Bacteria	g__unidentified_Bacteria	s__unidentified_Bacteria	New.CleanUp.ReferenceOTU70272
OTU30871	0	0	0	0	0	0	0	0	0	0	1	0	0	0	0	0	0	0	0	0	0	0	0	0	0	0	0	0	0	0	0	0	0	0	0	0	k__Bacteria	p__unidentified_Bacteria	c__unidentified_Bacteria	o__uidentified	f__unidentified_Bacteria	g__unidentified_Bacteria	s__unidentified_Bacteria	New.CleanUp.ReferenceOTU115967
OTU32002	0	0	0	0	0	0	0	0	0	0	0	0	0	0	0	0	0	0	0	0	0	1	0	0	0	0	0	0	0	0	0	0	0	0	0	0	k__Bacteria	p__unidentified_Bacteria	c__unidentified_Bacteria	o__uidentified	f__unidentified_Bacteria	g__unidentified_Bacteria	s__unidentified_Bacteria	New.CleanUp.ReferenceOTU123398
OTU45328	0	0	0	0	0	0	0	0	0	0	0	0	0	0	0	0	0	0	0	0	0	0	0	0	0	0	0	0	0	0	0	1	0	0	0	0	k__Bacteria	p__unidentified_Bacteria	c__unidentified_Bacteria	o__uidentified	f__unidentified_Bacteria	g__unidentified_Bacteria	s__unidentified_Bacteria	New.CleanUp.ReferenceOTU207857
OTU56488	0	0	0	0	0	1	0	0	0	0	0	0	0	0	0	0	0	0	0	0	0	0	0	0	0	0	0	0	0	0	0	0	0	0	0	0	k__Bacteria	p__unidentified_Bacteria	c__unidentified_Bacteria	o__uidentified	f__unidentified_Bacteria	g__unidentified_Bacteria	s__unidentified_Bacteria	New.CleanUp.ReferenceOTU277126
OTU62301	0	0	0	0	0	0	0	0	0	0	0	0	0	0	0	0	0	0	0	0	0	0	0	0	0	0	0	0	0	0	0	1	0	0	0	0	k__Bacteria	p__unidentified_Bacteria	c__unidentified_Bacteria	o__uidentified	f__unidentified_Bacteria	g__unidentified_Bacteria	s__unidentified_Bacteria	New.CleanUp.ReferenceOTU313432
OTU62443	0	0	0	0	0	0	0	0	0	0	0	0	0	0	0	0	0	0	0	0	0	0	0	0	0	0	1	0	0	0	0	0	0	0	0	0	k__Bacteria	p__unidentified_Bacteria	c__unidentified_Bacteria	o__uidentified	f__unidentified_Bacteria	g__unidentified_Bacteria	s__unidentified_Bacteria	New.CleanUp.ReferenceOTU314347
OTU67883	0	0	0	0	0	0	0	0	0	0	0	0	1	0	0	0	0	0	0	0	0	0	0	0	0	0	0	0	0	0	0	0	0	0	0	0	k__Bacteria	p__unidentified_Bacteria	c__unidentified_Bacteria	o__uidentified	f__unidentified_Bacteria	g__unidentified_Bacteria	s__unidentified_Bacteria	New.CleanUp.ReferenceOTU350131
OTU9200	0	0	0	0	0	0	0	0	0	0	0	0	0	0	0	3	0	0	0	0	0	0	0	2	0	0	0	0	0	0	0	0	0	0	0	0	k__Bacteria	p__[Thermi]	c__Deinococci	o__Thermales	f__Thermaceae	g__Thermus	s__	136627
OTU11503	0	0	0	0	0	0	0	0	0	0	0	0	0	0	0	2	0	0	0	0	0	0	0	0	0	0	0	0	0	0	0	0	0	0	1	0	k__Bacteria	p__[Thermi]	c__Deinococci	o__Thermales	f__Thermaceae	g__Thermus	s__	242883
OTU11033	0	0	0	0	0	1	0	0	0	0	0	0	0	0	0	0	0	0	0	0	0	0	0	0	0	0	0	0	0	0	0	0	0	0	0	0	k__Bacteria	p__[Thermi]	c__Deinococci	o__Deinococcales	f__Deinococcaceae	g__Deinococcus	s__	365101
OTU32081	10	1	21	0	0	0	0	0	0	0	1	29	11	5	23	3	2	0	1	19	2	0	0	16	0	0	0	0	0	0	0	0	0	0	0	0	k__Bacteria	p__Acidobacteria	c__unidentified_Acidobacteria	o__uidentified_Acidobacteria	f__unidentified_Acidobacteria	g__unidentified_Acidobacteria	s__unidentified_Acidobacteria	New.CleanUp.ReferenceOTU123877
OTU25254	19	10	2	0	0	0	0	0	0	0	0	0	2	9	3	9	0	0	3	3	0	0	0	14	0	0	0	0	0	0	0	0	0	0	0	0	k__Bacteria	p__Acidobacteria	c__unidentified_Acidobacteria	o__uidentified_Acidobacteria	f__unidentified_Acidobacteria	g__unidentified_Acidobacteria	s__unidentified_Acidobacteria	New.CleanUp.ReferenceOTU79394
OTU66537	9	3	1	0	0	0	0	0	0	0	0	0	5	12	12	4	0	0	4	3	2	0	0	5	0	0	0	0	0	0	0	0	0	0	0	0	k__Bacteria	p__Acidobacteria	c__unidentified_Acidobacteria	o__uidentified_Acidobacteria	f__unidentified_Acidobacteria	g__unidentified_Acidobacteria	s__unidentified_Acidobacteria	New.CleanUp.ReferenceOTU341141
OTU7408	4	3	0	0	0	0	0	0	0	0	0	0	3	11	4	1	0	0	2	4	3	0	0	1	0	0	0	0	0	0	0	0	0	0	0	0	k__Bacteria	p__Acidobacteria	c__unidentified_Acidobacteria	o__uidentified_Acidobacteria	f__unidentified_Acidobacteria	g__unidentified_Acidobacteria	s__unidentified_Acidobacteria	802573
OTU11441	2	1	4	1	1	0	1	0	0	0	1	1	2	1	7	1	0	0	7	4	0	0	0	0	0	0	0	0	0	0	0	0	0	0	0	0	k__Bacteria	p__Acidobacteria	c__unidentified_Acidobacteria	o__uidentified_Acidobacteria	f__unidentified_Acidobacteria	g__unidentified_Acidobacteria	s__unidentified_Acidobacteria	673825
OTU2437	0	0	6	0	0	0	0	0	3	0	0	7	1	0	5	1	0	0	0	0	9	0	0	1	0	0	0	0	0	0	0	0	0	0	0	0	k__Bacteria	p__Acidobacteria	c__unidentified_Acidobacteria	o__uidentified_Acidobacteria	f__unidentified_Acidobacteria	g__unidentified_Acidobacteria	s__unidentified_Acidobacteria	252249
OTU43843	1	1	5	0	1	0	1	0	1	0	1	3	2	1	4	1	1	1	2	1	3	0	0	2	0	0	0	0	0	0	0	0	0	0	0	0	k__Bacteria	p__Acidobacteria	c__unidentified_Acidobacteria	o__uidentified_Acidobacteria	f__unidentified_Acidobacteria	g__unidentified_Acidobacteria	s__unidentified_Acidobacteria	New.CleanUp.ReferenceOTU198303
OTU9911	3	0	0	0	0	0	0	0	0	0	0	0	1	11	3	3	0	0	0	0	0	0	0	9	0	0	0	0	0	0	0	0	0	0	0	0	k__Bacteria	p__Acidobacteria	c__unidentified_Acidobacteria	o__uidentified_Acidobacteria	f__unidentified_Acidobacteria	g__unidentified_Acidobacteria	s__unidentified_Acidobacteria	4345194
OTU51709	7	0	0	0	0	0	0	0	0	0	0	0	0	4	4	0	0	0	1	0	0	0	0	6	0	0	0	0	0	0	0	0	0	0	0	0	k__Bacteria	p__Acidobacteria	c__unidentified_Acidobacteria	o__uidentified_Acidobacteria	f__unidentified_Acidobacteria	g__unidentified_Acidobacteria	s__unidentified_Acidobacteria	New.CleanUp.ReferenceOTU246994
OTU51044	0	0	7	0	0	0	0	0	0	0	2	0	0	0	1	1	0	0	0	0	0	0	0	2	0	0	0	0	0	0	0	0	0	0	0	0	k__Bacteria	p__Acidobacteria	c__unidentified_Acidobacteria	o__uidentified_Acidobacteria	f__unidentified_Acidobacteria	g__unidentified_Acidobacteria	s__unidentified_Acidobacteria	New.CleanUp.ReferenceOTU242779
OTU825	1	0	3	2	0	0	0	0	3	0	0	0	0	0	2	0	0	0	0	0	0	0	0	0	0	0	0	0	0	0	0	0	0	0	0	0	k__Bacteria	p__Acidobacteria	c__unidentified_Acidobacteria	o__uidentified_Acidobacteria	f__unidentified_Acidobacteria	g__unidentified_Acidobacteria	s__unidentified_Acidobacteria	4334908
OTU1991	2	1	0	0	0	0	0	0	0	0	0	0	0	0	6	2	0	0	0	0	0	0	0	0	0	0	0	0	0	0	0	0	0	0	0	0	k__Bacteria	p__Acidobacteria	c__unidentified_Acidobacteria	o__uidentified_Acidobacteria	f__unidentified_Acidobacteria	g__unidentified_Acidobacteria	s__unidentified_Acidobacteria	4302931
OTU1476	0	0	0	0	0	0	0	0	0	0	2	0	1	0	0	1	1	0	0	1	2	0	0	2	0	0	0	0	0	0	0	0	0	0	0	0	k__Bacteria	p__Acidobacteria	c__unidentified_Acidobacteria	o__uidentified_Acidobacteria	f__unidentified_Acidobacteria	g__unidentified_Acidobacteria	s__unidentified_Acidobacteria	816208
OTU45252	0	0	0	0	0	0	0	0	1	3	0	0	0	0	0	0	0	0	0	0	0	2	4	0	0	0	0	0	0	0	0	0	0	0	0	0	k__Bacteria	p__Acidobacteria	c__unidentified_Acidobacteria	o__uidentified_Acidobacteria	f__unidentified_Acidobacteria	g__unidentified_Acidobacteria	s__unidentified_Acidobacteria	New.CleanUp.ReferenceOTU207392
OTU218	0	0	0	0	0	0	0	0	0	0	0	0	0	0	0	8	0	0	0	0	0	0	0	0	0	0	0	0	0	0	0	0	0	0	0	0	k__Bacteria	p__Acidobacteria	c__unidentified_Acidobacteria	o__uidentified_Acidobacteria	f__unidentified_Acidobacteria	g__unidentified_Acidobacteria	s__unidentified_Acidobacteria	4301960
OTU3737	3	0	1	0	0	0	0	0	0	0	0	0	0	0	1	0	0	0	0	0	0	0	0	1	0	0	0	0	0	0	0	0	0	0	0	0	k__Bacteria	p__Acidobacteria	c__unidentified_Acidobacteria	o__uidentified_Acidobacteria	f__unidentified_Acidobacteria	g__unidentified_Acidobacteria	s__unidentified_Acidobacteria	4330087
OTU8280	0	0	1	0	0	0	0	0	0	0	0	0	0	0	0	0	0	0	0	1	1	1	0	2	0	0	0	0	0	0	0	0	0	0	0	0	k__Bacteria	p__Acidobacteria	c__unidentified_Acidobacteria	o__uidentified_Acidobacteria	f__unidentified_Acidobacteria	g__unidentified_Acidobacteria	s__unidentified_Acidobacteria	329074
OTU12019	3	0	1	0	0	0	0	0	0	0	0	0	0	0	0	1	0	0	0	0	0	0	0	0	0	0	0	0	0	0	0	0	0	0	0	0	k__Bacteria	p__Acidobacteria	c__unidentified_Acidobacteria	o__uidentified_Acidobacteria	f__unidentified_Acidobacteria	g__unidentified_Acidobacteria	s__unidentified_Acidobacteria	New.ReferenceOTU239
OTU21339	2	0	0	0	0	0	0	0	0	0	0	0	0	2	0	0	0	0	0	0	1	0	0	0	0	0	0	0	0	0	0	0	0	0	0	0	k__Bacteria	p__Acidobacteria	c__unidentified_Acidobacteria	o__uidentified_Acidobacteria	f__unidentified_Acidobacteria	g__unidentified_Acidobacteria	s__unidentified_Acidobacteria	New.CleanUp.ReferenceOTU54547
OTU1678	1	0	0	0	0	0	0	0	0	0	0	1	0	0	1	0	0	0	0	1	0	0	0	0	0	0	0	0	0	0	0	0	0	0	0	0	k__Bacteria	p__Acidobacteria	c__unidentified_Acidobacteria	o__uidentified_Acidobacteria	f__unidentified_Acidobacteria	g__unidentified_Acidobacteria	s__unidentified_Acidobacteria	207151
OTU53994	1	0	0	0	0	0	0	0	0	0	0	0	0	0	0	3	0	0	0	0	0	0	0	0	0	0	0	0	0	0	0	0	0	0	0	0	k__Bacteria	p__Acidobacteria	c__unidentified_Acidobacteria	o__uidentified_Acidobacteria	f__unidentified_Acidobacteria	g__unidentified_Acidobacteria	s__unidentified_Acidobacteria	New.CleanUp.ReferenceOTU260981
OTU65213	0	0	0	0	0	0	0	0	0	0	0	0	0	0	0	0	0	0	0	0	0	0	0	4	0	0	0	0	0	0	0	0	0	0	0	0	k__Bacteria	p__Acidobacteria	c__unidentified_Acidobacteria	o__uidentified_Acidobacteria	f__unidentified_Acidobacteria	g__unidentified_Acidobacteria	s__unidentified_Acidobacteria	New.CleanUp.ReferenceOTU332315
OTU36169	1	0	0	0	0	0	0	0	0	0	0	0	1	0	1	0	0	0	0	0	0	0	0	0	0	0	0	0	0	0	0	0	0	0	0	0	k__Bacteria	p__Acidobacteria	c__unidentified_Acidobacteria	o__uidentified_Acidobacteria	f__unidentified_Acidobacteria	g__unidentified_Acidobacteria	s__unidentified_Acidobacteria	New.CleanUp.ReferenceOTU150844
OTU49926	0	0	0	0	0	0	0	0	0	0	0	0	0	0	0	0	0	0	0	0	0	0	0	3	0	0	0	0	0	0	0	0	0	0	0	0	k__Bacteria	p__Acidobacteria	c__unidentified_Acidobacteria	o__uidentified_Acidobacteria	f__unidentified_Acidobacteria	g__unidentified_Acidobacteria	s__unidentified_Acidobacteria	New.CleanUp.ReferenceOTU235989
OTU22477	0	0	0	0	0	0	0	0	0	0	0	0	1	0	0	0	0	0	0	0	0	0	0	1	0	0	0	0	0	0	0	0	0	0	0	0	k__Bacteria	p__Acidobacteria	c__unidentified_Acidobacteria	o__uidentified_Acidobacteria	f__unidentified_Acidobacteria	g__unidentified_Acidobacteria	s__unidentified_Acidobacteria	New.CleanUp.ReferenceOTU61667
OTU27508	0	0	0	0	0	0	0	0	0	0	0	0	1	0	0	0	0	0	1	0	0	0	0	0	0	0	0	0	0	0	0	0	0	0	0	0	k__Bacteria	p__Acidobacteria	c__unidentified_Acidobacteria	o__uidentified_Acidobacteria	f__unidentified_Acidobacteria	g__unidentified_Acidobacteria	s__unidentified_Acidobacteria	New.CleanUp.ReferenceOTU94239
OTU33755	0	0	0	0	0	0	0	0	0	0	0	0	0	0	0	1	0	0	0	0	0	0	0	1	0	0	0	0	0	0	0	0	0	0	0	0	k__Bacteria	p__Acidobacteria	c__unidentified_Acidobacteria	o__uidentified_Acidobacteria	f__unidentified_Acidobacteria	g__unidentified_Acidobacteria	s__unidentified_Acidobacteria	New.CleanUp.ReferenceOTU135015
OTU4201	0	0	0	0	0	0	0	0	0	0	0	0	0	0	0	0	0	0	0	0	0	0	0	1	0	0	0	0	0	0	0	0	0	0	0	0	k__Bacteria	p__Acidobacteria	c__unidentified_Acidobacteria	o__uidentified_Acidobacteria	f__unidentified_Acidobacteria	g__unidentified_Acidobacteria	s__unidentified_Acidobacteria	698811
OTU18419	0	0	0	0	0	0	0	0	0	0	0	0	0	0	0	0	0	0	0	0	0	0	0	1	0	0	0	0	0	0	0	0	0	0	0	0	k__Bacteria	p__Acidobacteria	c__unidentified_Acidobacteria	o__uidentified_Acidobacteria	f__unidentified_Acidobacteria	g__unidentified_Acidobacteria	s__unidentified_Acidobacteria	New.CleanUp.ReferenceOTU36540
OTU24933	0	0	0	0	0	0	0	0	0	0	0	0	0	0	1	0	0	0	0	0	0	0	0	0	0	0	0	0	0	0	0	0	0	0	0	0	k__Bacteria	p__Acidobacteria	c__unidentified_Acidobacteria	o__uidentified_Acidobacteria	f__unidentified_Acidobacteria	g__unidentified_Acidobacteria	s__unidentified_Acidobacteria	New.CleanUp.ReferenceOTU77269
OTU27491	0	0	0	0	0	0	0	0	0	0	0	0	1	0	0	0	0	0	0	0	0	0	0	0	0	0	0	0	0	0	0	0	0	0	0	0	k__Bacteria	p__Acidobacteria	c__unidentified_Acidobacteria	o__uidentified_Acidobacteria	f__unidentified_Acidobacteria	g__unidentified_Acidobacteria	s__unidentified_Acidobacteria	New.CleanUp.ReferenceOTU94120
OTU45776	0	0	0	0	0	0	0	0	0	0	0	0	0	0	0	0	0	0	0	0	0	0	0	1	0	0	0	0	0	0	0	0	0	0	0	0	k__Bacteria	p__Acidobacteria	c__unidentified_Acidobacteria	o__uidentified_Acidobacteria	f__unidentified_Acidobacteria	g__unidentified_Acidobacteria	s__unidentified_Acidobacteria	New.CleanUp.ReferenceOTU210453
OTU49588	0	0	0	0	0	0	0	0	0	0	0	0	0	0	0	0	0	0	0	0	0	0	0	1	0	0	0	0	0	0	0	0	0	0	0	0	k__Bacteria	p__Acidobacteria	c__unidentified_Acidobacteria	o__uidentified_Acidobacteria	f__unidentified_Acidobacteria	g__unidentified_Acidobacteria	s__unidentified_Acidobacteria	New.CleanUp.ReferenceOTU233842
OTU64039	0	0	0	0	0	0	0	0	0	0	0	0	0	0	0	0	0	0	0	0	0	0	0	1	0	0	0	0	0	0	0	0	0	0	0	0	k__Bacteria	p__Acidobacteria	c__unidentified_Acidobacteria	o__uidentified_Acidobacteria	f__unidentified_Acidobacteria	g__unidentified_Acidobacteria	s__unidentified_Acidobacteria	New.CleanUp.ReferenceOTU324484
OTU66388	0	0	0	0	0	0	0	0	0	0	0	0	0	0	0	1	0	0	0	0	0	0	0	0	0	0	0	0	0	0	0	0	0	0	0	0	k__Bacteria	p__Acidobacteria	c__unidentified_Acidobacteria	o__uidentified_Acidobacteria	f__unidentified_Acidobacteria	g__unidentified_Acidobacteria	s__unidentified_Acidobacteria	New.CleanUp.ReferenceOTU340181
OTU26492	0	0	1	0	0	0	0	0	0	0	0	0	1	0	1	0	0	0	1	0	0	0	0	0	0	0	0	0	0	0	0	0	0	0	0	0	k__Bacteria	p__Acidobacteria	c__[Chloracidobacteria]	o__unidentified_[Chloracidobacteria]	f__unidentified_[Chloracidobacteria]	g__unidentified_[Chloracidobacteria]	s__unidentified_[Chloracidobacteria]	New.CleanUp.ReferenceOTU87506
OTU66560	0	0	0	0	0	0	0	0	0	0	1	0	0	0	0	0	0	0	0	0	0	0	0	0	0	0	0	0	0	0	0	0	1	0	1	0	k__Bacteria	p__Acidobacteria	c__[Chloracidobacteria]	o__unidentified_[Chloracidobacteria]	f__unidentified_[Chloracidobacteria]	g__unidentified_[Chloracidobacteria]	s__unidentified_[Chloracidobacteria]	New.CleanUp.ReferenceOTU341299
OTU10505	0	0	0	0	0	0	0	0	0	0	0	0	0	0	0	0	0	0	0	2	0	0	0	0	0	0	0	0	0	0	0	0	0	0	0	0	k__Bacteria	p__Acidobacteria	c__[Chloracidobacteria]	o__unidentified_[Chloracidobacteria]	f__unidentified_[Chloracidobacteria]	g__unidentified_[Chloracidobacteria]	s__unidentified_[Chloracidobacteria]	4331249
OTU31056	0	0	0	0	1	0	0	0	0	0	0	0	0	0	0	0	0	0	0	0	0	0	0	0	0	0	0	0	0	0	0	0	0	0	1	0	k__Bacteria	p__Acidobacteria	c__[Chloracidobacteria]	o__unidentified_[Chloracidobacteria]	f__unidentified_[Chloracidobacteria]	g__unidentified_[Chloracidobacteria]	s__unidentified_[Chloracidobacteria]	New.CleanUp.ReferenceOTU117051
OTU57307	0	0	0	0	0	0	0	0	0	0	1	0	0	0	0	0	0	1	0	0	0	0	0	0	0	0	0	0	0	0	0	0	0	0	0	0	k__Bacteria	p__Acidobacteria	c__[Chloracidobacteria]	o__unidentified_[Chloracidobacteria]	f__unidentified_[Chloracidobacteria]	g__unidentified_[Chloracidobacteria]	s__unidentified_[Chloracidobacteria]	New.CleanUp.ReferenceOTU281938
OTU28840	0	0	0	0	0	0	0	0	0	0	0	0	0	0	0	0	0	0	0	0	0	0	1	0	0	0	0	0	0	0	0	0	0	0	0	0	k__Bacteria	p__Acidobacteria	c__[Chloracidobacteria]	o__unidentified_[Chloracidobacteria]	f__unidentified_[Chloracidobacteria]	g__unidentified_[Chloracidobacteria]	s__unidentified_[Chloracidobacteria]	New.CleanUp.ReferenceOTU102894
OTU30979	0	0	0	0	0	0	0	0	0	0	0	0	0	1	0	0	0	0	0	0	0	0	0	0	0	0	0	0	0	0	0	0	0	0	0	0	k__Bacteria	p__Acidobacteria	c__[Chloracidobacteria]	o__unidentified_[Chloracidobacteria]	f__unidentified_[Chloracidobacteria]	g__unidentified_[Chloracidobacteria]	s__unidentified_[Chloracidobacteria]	New.CleanUp.ReferenceOTU116535
OTU49641	0	0	0	0	0	0	0	0	0	0	0	0	0	0	0	0	0	0	0	0	0	0	1	0	0	0	0	0	0	0	0	0	0	0	0	0	k__Bacteria	p__Acidobacteria	c__[Chloracidobacteria]	o__unidentified_[Chloracidobacteria]	f__unidentified_[Chloracidobacteria]	g__unidentified_[Chloracidobacteria]	s__unidentified_[Chloracidobacteria]	New.CleanUp.ReferenceOTU234109
OTU53946	0	0	0	0	0	0	0	0	0	0	0	0	0	0	1	0	0	0	0	0	0	0	0	0	0	0	0	0	0	0	0	0	0	0	0	0	k__Bacteria	p__Acidobacteria	c__[Chloracidobacteria]	o__unidentified_[Chloracidobacteria]	f__unidentified_[Chloracidobacteria]	g__unidentified_[Chloracidobacteria]	s__unidentified_[Chloracidobacteria]	New.CleanUp.ReferenceOTU260725
OTU10698	23	2	1	1	0	0	0	0	0	0	0	0	8	12	15	14	0	0	0	1	12	0	0	39	0	0	0	0	0	0	0	0	0	0	0	0	k__Bacteria	p__Acidobacteria	c__[Chloracidobacteria]	o__11-24	f__unidentified_11-24	g__unidentified_11-24	s__unidentified_11-24	624858
OTU53708	0	0	0	0	0	0	0	0	0	0	1	0	0	0	0	0	0	0	0	0	85	30	0	12	0	0	0	0	0	0	0	0	0	0	0	0	k__Bacteria	p__Acidobacteria	c__[Chloracidobacteria]	o__11-24	f__unidentified_11-24	g__unidentified_11-24	s__unidentified_11-24	New.CleanUp.ReferenceOTU259286
OTU10892	1	0	5	0	0	0	0	0	0	0	2	1	15	2	20	0	0	0	6	10	0	0	0	0	0	0	0	0	0	0	0	0	0	0	0	0	k__Bacteria	p__Acidobacteria	c__[Chloracidobacteria]	o__11-24	f__unidentified_11-24	g__unidentified_11-24	s__unidentified_11-24	632918
OTU4050	1	0	1	1	0	0	0	0	0	0	0	0	1	0	2	7	0	0	1	2	2	0	0	13	0	0	0	0	0	0	0	0	0	0	0	0	k__Bacteria	p__Acidobacteria	c__[Chloracidobacteria]	o__11-24	f__unidentified_11-24	g__unidentified_11-24	s__unidentified_11-24	590747
OTU6736	0	0	0	0	0	0	0	0	0	0	2	0	0	0	0	0	0	0	0	0	16	1	0	1	0	0	0	0	0	0	0	0	0	0	0	0	k__Bacteria	p__Acidobacteria	c__[Chloracidobacteria]	o__11-24	f__unidentified_11-24	g__unidentified_11-24	s__unidentified_11-24	815931
OTU24481	2	0	0	0	0	0	0	0	0	0	0	1	1	0	1	0	0	0	0	0	0	0	0	2	0	0	0	0	0	0	0	0	0	0	0	0	k__Bacteria	p__Acidobacteria	c__[Chloracidobacteria]	o__11-24	f__unidentified_11-24	g__unidentified_11-24	s__unidentified_11-24	New.CleanUp.ReferenceOTU74437
OTU8735	0	0	0	0	0	0	0	0	0	0	0	0	2	1	0	3	0	0	0	0	0	0	0	0	0	0	0	0	0	0	0	0	0	0	0	0	k__Bacteria	p__Acidobacteria	c__[Chloracidobacteria]	o__11-24	f__unidentified_11-24	g__unidentified_11-24	s__unidentified_11-24	210951
OTU25231	2	1	0	0	0	0	0	0	0	0	0	0	0	2	0	0	0	0	0	0	0	0	0	0	0	0	0	0	0	0	0	0	0	0	0	0	k__Bacteria	p__Acidobacteria	c__[Chloracidobacteria]	o__11-24	f__unidentified_11-24	g__unidentified_11-24	s__unidentified_11-24	New.CleanUp.ReferenceOTU79256
OTU18501	0	0	0	0	0	0	0	0	0	0	0	0	0	0	0	1	0	0	0	0	0	0	0	3	0	0	0	0	0	0	0	0	0	0	0	0	k__Bacteria	p__Acidobacteria	c__[Chloracidobacteria]	o__11-24	f__unidentified_11-24	g__unidentified_11-24	s__unidentified_11-24	New.CleanUp.ReferenceOTU37009
OTU9986	0	0	0	0	0	0	0	0	0	0	0	2	0	0	0	0	0	0	0	0	0	0	0	1	0	0	0	0	0	0	0	0	0	0	0	0	k__Bacteria	p__Acidobacteria	c__[Chloracidobacteria]	o__11-24	f__unidentified_11-24	g__unidentified_11-24	s__unidentified_11-24	822282
OTU2581	0	0	0	0	0	0	0	0	0	0	0	0	0	0	0	2	0	0	0	0	0	0	0	0	0	0	0	0	0	0	0	0	0	0	0	0	k__Bacteria	p__Acidobacteria	c__[Chloracidobacteria]	o__11-24	f__unidentified_11-24	g__unidentified_11-24	s__unidentified_11-24	4456936
OTU59226	0	0	0	0	0	0	0	0	0	0	0	0	0	0	0	0	0	0	2	0	0	0	0	0	0	0	0	0	0	0	0	0	0	0	0	0	k__Bacteria	p__Acidobacteria	c__[Chloracidobacteria]	o__11-24	f__unidentified_11-24	g__unidentified_11-24	s__unidentified_11-24	New.CleanUp.ReferenceOTU293825
OTU4283	0	0	0	0	0	0	0	0	0	0	0	0	0	0	0	0	0	0	0	0	1	0	0	0	0	0	0	0	0	0	0	0	0	0	0	0	k__Bacteria	p__Acidobacteria	c__[Chloracidobacteria]	o__11-24	f__unidentified_11-24	g__unidentified_11-24	s__unidentified_11-24	1111517
OTU9208	0	0	0	0	0	0	0	0	0	0	0	0	0	0	0	0	0	0	0	0	0	0	0	1	0	0	0	0	0	0	0	0	0	0	0	0	k__Bacteria	p__Acidobacteria	c__[Chloracidobacteria]	o__11-24	f__unidentified_11-24	g__unidentified_11-24	s__unidentified_11-24	339544
OTU23236	0	0	0	0	0	0	0	0	0	0	1	0	0	0	0	0	0	0	0	0	0	0	0	0	0	0	0	0	0	0	0	0	0	0	0	0	k__Bacteria	p__Acidobacteria	c__[Chloracidobacteria]	o__11-24	f__unidentified_11-24	g__unidentified_11-24	s__unidentified_11-24	New.CleanUp.ReferenceOTU66570
OTU27893	0	1	0	0	0	0	0	0	0	0	0	0	0	0	0	0	0	0	0	0	0	0	0	0	0	0	0	0	0	0	0	0	0	0	0	0	k__Bacteria	p__Acidobacteria	c__[Chloracidobacteria]	o__11-24	f__unidentified_11-24	g__unidentified_11-24	s__unidentified_11-24	New.CleanUp.ReferenceOTU96776
OTU33682	0	0	0	0	0	0	0	0	0	0	0	0	0	0	1	0	0	0	0	0	0	0	0	0	0	0	0	0	0	0	0	0	0	0	0	0	k__Bacteria	p__Acidobacteria	c__[Chloracidobacteria]	o__11-24	f__unidentified_11-24	g__unidentified_11-24	s__unidentified_11-24	New.CleanUp.ReferenceOTU134595
OTU36595	0	1	0	0	0	0	0	0	0	0	0	0	0	0	0	0	0	0	0	0	0	0	0	0	0	0	0	0	0	0	0	0	0	0	0	0	k__Bacteria	p__Acidobacteria	c__[Chloracidobacteria]	o__11-24	f__unidentified_11-24	g__unidentified_11-24	s__unidentified_11-24	New.CleanUp.ReferenceOTU153794
OTU50692	0	0	0	0	0	0	0	0	0	0	0	0	0	0	0	1	0	0	0	0	0	0	0	0	0	0	0	0	0	0	0	0	0	0	0	0	k__Bacteria	p__Acidobacteria	c__[Chloracidobacteria]	o__11-24	f__unidentified_11-24	g__unidentified_11-24	s__unidentified_11-24	New.CleanUp.ReferenceOTU240781
OTU55766	0	0	0	0	0	0	0	0	0	1	0	0	0	0	0	0	0	0	0	0	0	0	0	0	0	0	0	0	0	0	0	0	0	0	0	0	k__Bacteria	p__Acidobacteria	c__[Chloracidobacteria]	o__11-24	f__unidentified_11-24	g__unidentified_11-24	s__unidentified_11-24	New.CleanUp.ReferenceOTU272396
OTU6928	12	11	6	4	0	0	0	0	0	0	0	27	10	15	12	0	0	0	43	12	17	4	0	3	0	0	0	0	0	0	0	0	0	0	0	0	k__Bacteria	p__Acidobacteria	c__[Chloracidobacteria]	o__DS-100	f__unidentified_DS-100	g__unidentified_DS-100	s__unidentified_DS-100	3783370
OTU3999	5	6	5	0	0	0	0	0	1	0	0	0	0	0	1	0	0	0	0	0	4	0	0	0	0	0	0	0	0	0	0	0	0	0	0	0	k__Bacteria	p__Acidobacteria	c__[Chloracidobacteria]	o__DS-100	f__unidentified_DS-100	g__unidentified_DS-100	s__unidentified_DS-100	4319244
OTU44568	0	0	0	0	0	0	0	0	1	0	0	2	6	0	2	0	0	0	2	2	2	0	0	0	0	0	0	0	0	0	0	0	0	0	0	0	k__Bacteria	p__Acidobacteria	c__[Chloracidobacteria]	o__DS-100	f__unidentified_DS-100	g__unidentified_DS-100	s__unidentified_DS-100	New.CleanUp.ReferenceOTU202826
OTU5494	1	2	0	0	0	0	0	0	0	0	0	1	0	1	1	6	0	0	0	0	0	0	0	3	0	0	0	0	0	0	0	0	0	0	0	0	k__Bacteria	p__Acidobacteria	c__[Chloracidobacteria]	o__DS-100	f__unidentified_DS-100	g__unidentified_DS-100	s__unidentified_DS-100	4398257
OTU27904	1	1	0	1	0	1	0	1	0	0	0	1	2	1	0	0	0	0	0	0	1	0	0	0	0	1	0	0	0	0	0	0	0	1	0	0	k__Bacteria	p__Acidobacteria	c__[Chloracidobacteria]	o__DS-100	f__unidentified_DS-100	g__unidentified_DS-100	s__unidentified_DS-100	New.CleanUp.ReferenceOTU96845
OTU66599	5	1	5	0	0	0	0	0	0	0	0	0	0	0	0	0	0	0	0	0	0	0	0	0	0	0	0	0	0	0	0	0	0	0	0	0	k__Bacteria	p__Acidobacteria	c__[Chloracidobacteria]	o__DS-100	f__unidentified_DS-100	g__unidentified_DS-100	s__unidentified_DS-100	New.CleanUp.ReferenceOTU341634
OTU3822	3	0	0	0	0	0	0	0	0	0	0	0	0	1	0	3	0	0	0	0	0	0	0	2	0	0	0	0	0	0	0	0	0	0	0	0	k__Bacteria	p__Acidobacteria	c__[Chloracidobacteria]	o__DS-100	f__unidentified_DS-100	g__unidentified_DS-100	s__unidentified_DS-100	3896028
OTU1957	0	0	0	0	0	0	0	0	0	0	0	0	1	0	3	1	0	0	0	0	0	0	0	2	0	0	0	0	0	0	0	0	0	0	0	0	k__Bacteria	p__Acidobacteria	c__[Chloracidobacteria]	o__DS-100	f__unidentified_DS-100	g__unidentified_DS-100	s__unidentified_DS-100	4433409
OTU33391	1	0	0	0	0	0	0	0	0	0	0	0	0	0	0	5	0	0	0	0	0	0	0	1	0	0	0	0	0	0	0	0	0	0	0	0	k__Bacteria	p__Acidobacteria	c__[Chloracidobacteria]	o__DS-100	f__unidentified_DS-100	g__unidentified_DS-100	s__unidentified_DS-100	New.CleanUp.ReferenceOTU132588
OTU2354	0	0	0	0	0	0	0	0	0	0	0	0	0	0	0	0	0	0	0	0	0	0	0	6	0	0	0	0	0	0	0	0	0	0	0	0	k__Bacteria	p__Acidobacteria	c__[Chloracidobacteria]	o__DS-100	f__unidentified_DS-100	g__unidentified_DS-100	s__unidentified_DS-100	4419173
OTU19590	2	0	0	0	0	0	0	0	0	0	0	0	0	0	2	2	0	0	0	0	0	0	0	0	0	0	0	0	0	0	0	0	0	0	0	0	k__Bacteria	p__Acidobacteria	c__[Chloracidobacteria]	o__DS-100	f__unidentified_DS-100	g__unidentified_DS-100	s__unidentified_DS-100	New.CleanUp.ReferenceOTU43703
OTU1786	0	1	0	0	0	0	0	0	0	0	0	2	1	0	0	0	0	0	0	0	0	0	0	0	0	0	0	0	0	0	0	0	0	0	0	0	k__Bacteria	p__Acidobacteria	c__[Chloracidobacteria]	o__DS-100	f__unidentified_DS-100	g__unidentified_DS-100	s__unidentified_DS-100	2315543
OTU27859	1	0	1	0	0	0	0	0	0	0	0	0	0	0	1	0	0	0	0	0	0	0	0	1	0	0	0	0	0	0	0	0	0	0	0	0	k__Bacteria	p__Acidobacteria	c__[Chloracidobacteria]	o__DS-100	f__unidentified_DS-100	g__unidentified_DS-100	s__unidentified_DS-100	New.CleanUp.ReferenceOTU96558
OTU28527	1	0	0	1	0	0	1	0	0	0	0	0	0	0	1	0	0	0	0	0	0	0	0	0	0	0	0	0	0	0	0	0	0	0	0	0	k__Bacteria	p__Acidobacteria	c__[Chloracidobacteria]	o__DS-100	f__unidentified_DS-100	g__unidentified_DS-100	s__unidentified_DS-100	New.CleanUp.ReferenceOTU100759
OTU24140	0	0	0	0	0	0	0	0	0	0	0	2	1	0	0	0	0	0	0	0	0	0	0	0	0	0	0	0	0	0	0	0	0	0	0	0	k__Bacteria	p__Acidobacteria	c__[Chloracidobacteria]	o__DS-100	f__unidentified_DS-100	g__unidentified_DS-100	s__unidentified_DS-100	New.CleanUp.ReferenceOTU72221
OTU15273	0	0	0	0	0	0	0	0	0	0	0	0	0	0	0	2	0	0	0	0	0	0	0	0	0	0	0	0	0	0	0	0	0	0	0	0	k__Bacteria	p__Acidobacteria	c__[Chloracidobacteria]	o__DS-100	f__unidentified_DS-100	g__unidentified_DS-100	s__unidentified_DS-100	New.CleanUp.ReferenceOTU17316
OTU46609	0	0	0	0	0	0	0	0	0	0	0	0	0	0	0	0	0	0	0	0	0	0	0	2	0	0	0	0	0	0	0	0	0	0	0	0	k__Bacteria	p__Acidobacteria	c__[Chloracidobacteria]	o__DS-100	f__unidentified_DS-100	g__unidentified_DS-100	s__unidentified_DS-100	New.CleanUp.ReferenceOTU215654
OTU59364	0	1	0	0	0	0	0	0	0	0	0	0	0	0	0	0	0	0	0	0	1	0	0	0	0	0	0	0	0	0	0	0	0	0	0	0	k__Bacteria	p__Acidobacteria	c__[Chloracidobacteria]	o__DS-100	f__unidentified_DS-100	g__unidentified_DS-100	s__unidentified_DS-100	New.CleanUp.ReferenceOTU294716
OTU66619	0	0	0	0	0	0	0	0	0	0	0	2	0	0	0	0	0	0	0	0	0	0	0	0	0	0	0	0	0	0	0	0	0	0	0	0	k__Bacteria	p__Acidobacteria	c__[Chloracidobacteria]	o__DS-100	f__unidentified_DS-100	g__unidentified_DS-100	s__unidentified_DS-100	New.CleanUp.ReferenceOTU341735
OTU21184	0	0	0	0	0	0	0	0	0	0	0	0	0	0	0	0	0	0	0	1	0	0	0	0	0	0	0	0	0	0	0	0	0	0	0	0	k__Bacteria	p__Acidobacteria	c__[Chloracidobacteria]	o__DS-100	f__unidentified_DS-100	g__unidentified_DS-100	s__unidentified_DS-100	New.CleanUp.ReferenceOTU53660
OTU55463	1	0	0	0	0	0	0	0	0	0	0	0	0	0	0	0	0	0	0	0	0	0	0	0	0	0	0	0	0	0	0	0	0	0	0	0	k__Bacteria	p__Acidobacteria	c__[Chloracidobacteria]	o__DS-100	f__unidentified_DS-100	g__unidentified_DS-100	s__unidentified_DS-100	New.CleanUp.ReferenceOTU270501
OTU7699	2	1	5	9	1	3	1	2	0	0	3	4	7	0	7	0	0	0	16	6	14	9	0	0	0	0	0	0	0	0	0	0	0	1	0	0	k__Bacteria	p__Acidobacteria	c__[Chloracidobacteria]	o__Ellin7246	f__unidentified_Ellin7246	g__unidentified_Ellin7246	s__unidentified_Ellin7246	4330994
OTU9425	0	0	1	0	1	0	0	0	0	0	0	0	0	0	0	0	0	0	0	0	0	1	2	0	0	0	0	0	0	0	0	0	0	0	0	0	k__Bacteria	p__Acidobacteria	c__[Chloracidobacteria]	o__Ellin7246	f__unidentified_Ellin7246	g__unidentified_Ellin7246	s__unidentified_Ellin7246	1132062
OTU39223	0	0	0	0	1	0	0	0	0	0	0	0	0	0	0	0	0	0	0	1	0	0	0	0	0	0	0	0	0	0	0	0	1	0	0	0	k__Bacteria	p__Acidobacteria	c__[Chloracidobacteria]	o__Ellin7246	f__unidentified_Ellin7246	g__unidentified_Ellin7246	s__unidentified_Ellin7246	New.CleanUp.ReferenceOTU171285
OTU8665	4	1	20	10	1	0	1	5	4	5	6	32	64	2	9	2	4	0	107	50	224	92	60	1	0	0	0	0	0	0	0	0	0	7	0	0	k__Bacteria	p__Acidobacteria	c__[Chloracidobacteria]	o__PK29	f__unidentified_PK29	g__unidentified_PK29	s__unidentified_PK29	732890
OTU1157	44	26	2	1	0	0	0	0	0	0	0	41	28	154	49	20	0	0	16	20	22	9	0	42	0	0	0	0	0	0	0	0	0	0	0	0	k__Bacteria	p__Acidobacteria	c__[Chloracidobacteria]	o__PK29	f__unidentified_PK29	g__unidentified_PK29	s__unidentified_PK29	4260702
OTU8513	0	0	0	0	0	0	0	0	0	1	0	0	0	15	2	23	0	0	0	0	0	0	0	97	0	0	0	0	0	0	0	0	0	0	0	0	k__Bacteria	p__Acidobacteria	c__[Chloracidobacteria]	o__PK29	f__unidentified_PK29	g__unidentified_PK29	s__unidentified_PK29	4443379
OTU1563	3	1	0	0	0	0	0	0	0	0	0	0	0	5	6	1	0	0	0	0	0	0	0	43	0	0	0	0	0	0	0	0	0	0	0	0	k__Bacteria	p__Acidobacteria	c__[Chloracidobacteria]	o__PK29	f__unidentified_PK29	g__unidentified_PK29	s__unidentified_PK29	4253641
OTU10132	1	0	0	0	0	0	0	0	0	0	0	0	0	10	2	6	0	0	0	0	0	0	0	2	0	0	0	0	0	0	0	0	0	0	0	0	k__Bacteria	p__Acidobacteria	c__[Chloracidobacteria]	o__PK29	f__unidentified_PK29	g__unidentified_PK29	s__unidentified_PK29	4414674
OTU3655	0	1	1	1	0	0	0	0	0	0	0	3	1	0	0	0	2	0	0	1	4	0	0	0	0	0	0	0	0	0	0	0	0	0	0	0	k__Bacteria	p__Acidobacteria	c__[Chloracidobacteria]	o__PK29	f__unidentified_PK29	g__unidentified_PK29	s__unidentified_PK29	314978
OTU10437	3	1	0	0	0	0	0	0	0	0	0	0	0	1	0	6	0	0	0	0	0	0	0	3	0	0	0	0	0	0	0	0	0	0	0	0	k__Bacteria	p__Acidobacteria	c__[Chloracidobacteria]	o__PK29	f__unidentified_PK29	g__unidentified_PK29	s__unidentified_PK29	572134
OTU25734	1	1	0	0	0	0	0	0	0	0	0	0	0	1	1	2	0	0	0	0	0	0	0	6	0	0	0	0	0	0	0	0	0	0	0	0	k__Bacteria	p__Acidobacteria	c__[Chloracidobacteria]	o__PK29	f__unidentified_PK29	g__unidentified_PK29	s__unidentified_PK29	New.CleanUp.ReferenceOTU82597
OTU140	0	0	0	0	0	0	0	0	0	0	0	0	0	0	1	5	0	0	0	0	0	0	0	0	0	0	0	0	0	0	0	0	0	0	0	0	k__Bacteria	p__Acidobacteria	c__[Chloracidobacteria]	o__PK29	f__unidentified_PK29	g__unidentified_PK29	s__unidentified_PK29	2453568
OTU1869	0	0	0	0	0	0	0	0	0	0	0	0	0	1	3	1	0	0	0	0	0	0	0	1	0	0	0	0	0	0	0	0	0	0	0	0	k__Bacteria	p__Acidobacteria	c__[Chloracidobacteria]	o__PK29	f__unidentified_PK29	g__unidentified_PK29	s__unidentified_PK29	537310
OTU1130	0	0	1	0	0	0	0	0	0	0	0	0	0	0	1	0	0	0	0	1	1	0	0	0	0	0	0	0	0	0	0	0	0	0	0	0	k__Bacteria	p__Acidobacteria	c__[Chloracidobacteria]	o__PK29	f__unidentified_PK29	g__unidentified_PK29	s__unidentified_PK29	4465887
OTU17050	2	0	0	0	0	0	0	0	0	0	0	1	0	0	0	0	0	0	0	0	0	0	0	0	0	0	0	0	0	0	0	0	0	0	0	0	k__Bacteria	p__Acidobacteria	c__[Chloracidobacteria]	o__PK29	f__unidentified_PK29	g__unidentified_PK29	s__unidentified_PK29	New.CleanUp.ReferenceOTU28132
OTU26019	0	0	0	0	0	0	0	0	0	0	0	1	0	0	0	0	0	0	0	2	0	0	0	0	0	0	0	0	0	0	0	0	0	0	0	0	k__Bacteria	p__Acidobacteria	c__[Chloracidobacteria]	o__PK29	f__unidentified_PK29	g__unidentified_PK29	s__unidentified_PK29	New.CleanUp.ReferenceOTU84391
OTU7161	1	0	0	0	0	0	0	0	0	0	0	0	0	0	0	0	0	0	0	0	0	0	0	1	0	0	0	0	0	0	0	0	0	0	0	0	k__Bacteria	p__Acidobacteria	c__[Chloracidobacteria]	o__PK29	f__unidentified_PK29	g__unidentified_PK29	s__unidentified_PK29	975325
OTU3812	0	0	0	0	0	0	0	0	0	0	0	0	0	0	0	0	0	0	0	0	0	0	0	1	0	0	0	0	0	0	0	0	0	0	0	0	k__Bacteria	p__Acidobacteria	c__[Chloracidobacteria]	o__PK29	f__unidentified_PK29	g__unidentified_PK29	s__unidentified_PK29	641116
OTU29394	0	0	0	0	0	0	0	0	0	0	0	0	0	1	0	0	0	0	0	0	0	0	0	0	0	0	0	0	0	0	0	0	0	0	0	0	k__Bacteria	p__Acidobacteria	c__[Chloracidobacteria]	o__PK29	f__unidentified_PK29	g__unidentified_PK29	s__unidentified_PK29	New.CleanUp.ReferenceOTU106632
OTU50005	0	0	0	0	0	0	0	0	0	0	0	0	0	0	0	0	0	0	0	0	0	0	0	1	0	0	0	0	0	0	0	0	0	0	0	0	k__Bacteria	p__Acidobacteria	c__[Chloracidobacteria]	o__PK29	f__unidentified_PK29	g__unidentified_PK29	s__unidentified_PK29	New.CleanUp.ReferenceOTU236485
OTU62654	0	0	0	0	0	0	0	0	0	0	0	0	0	0	0	0	0	0	0	0	0	0	0	1	0	0	0	0	0	0	0	0	0	0	0	0	k__Bacteria	p__Acidobacteria	c__[Chloracidobacteria]	o__PK29	f__unidentified_PK29	g__unidentified_PK29	s__unidentified_PK29	New.CleanUp.ReferenceOTU315723
OTU9789	56	66	83	116	45	1	34	113	61	43	22	98	169	96	61	30	88	4	397	195	450	139	127	67	0	0	0	0	0	0	0	0	1	7	1	3	k__Bacteria	p__Acidobacteria	c__[Chloracidobacteria]	o__RB41	f__unidentified_RB41	g__unidentified_RB41	s__unidentified_RB41	2406106
OTU941	50	33	16	12	22	0	2	0	0	0	0	37	43	55	34	22	1	0	99	25	77	8	1	35	0	0	0	0	0	0	0	0	0	0	0	0	k__Bacteria	p__Acidobacteria	c__[Chloracidobacteria]	o__RB41	f__unidentified_RB41	g__unidentified_RB41	s__unidentified_RB41	683649
OTU175	72	73	16	37	4	0	1	9	8	4	7	25	19	37	16	6	3	0	33	9	62	31	11	59	0	0	0	0	0	0	0	0	0	0	0	0	k__Bacteria	p__Acidobacteria	c__[Chloracidobacteria]	o__RB41	f__unidentified_RB41	g__unidentified_RB41	s__unidentified_RB41	803238
OTU9141	1	1	17	20	3	0	6	34	21	5	8	7	29	0	5	0	17	1	80	23	58	24	16	0	0	0	0	0	0	0	0	0	1	0	0	0	k__Bacteria	p__Acidobacteria	c__[Chloracidobacteria]	o__RB41	f__unidentified_RB41	g__unidentified_RB41	s__unidentified_RB41	2651008
OTU4231	9	6	16	1	1	0	1	0	0	0	1	28	17	25	23	10	2	0	55	32	40	2	0	9	0	0	0	0	0	0	0	0	0	0	0	0	k__Bacteria	p__Acidobacteria	c__[Chloracidobacteria]	o__RB41	f__unidentified_RB41	g__unidentified_RB41	s__unidentified_RB41	4373456
OTU2974	0	0	4	3	0	0	5	2	5	6	2	1	21	0	1	0	34	7	40	5	77	20	17	0	0	0	0	0	0	0	0	0	0	0	0	0	k__Bacteria	p__Acidobacteria	c__[Chloracidobacteria]	o__RB41	f__unidentified_RB41	g__unidentified_RB41	s__unidentified_RB41	689292
OTU6844	17	40	1	1	0	0	0	3	0	0	0	0	5	13	4	2	0	0	8	22	87	28	10	1	0	0	0	0	0	0	0	0	0	0	0	0	k__Bacteria	p__Acidobacteria	c__[Chloracidobacteria]	o__RB41	f__unidentified_RB41	g__unidentified_RB41	s__unidentified_RB41	254115
OTU9241	9	7	11	2	0	0	1	0	0	0	0	1	12	8	11	5	0	0	79	33	4	0	0	40	0	0	0	0	0	0	0	0	0	0	0	0	k__Bacteria	p__Acidobacteria	c__[Chloracidobacteria]	o__RB41	f__unidentified_RB41	g__unidentified_RB41	s__unidentified_RB41	825595
OTU8870	1	0	1	0	7	0	6	12	16	4	8	1	7	0	0	0	23	4	7	1	10	11	15	0	0	0	0	0	0	0	0	0	22	20	5	14	k__Bacteria	p__Acidobacteria	c__[Chloracidobacteria]	o__RB41	f__unidentified_RB41	g__unidentified_RB41	s__unidentified_RB41	218151
OTU1020	0	1	7	3	1	0	0	1	0	2	0	5	0	0	6	1	0	0	16	17	59	14	15	0	0	0	0	0	0	0	0	0	0	0	0	0	k__Bacteria	p__Acidobacteria	c__[Chloracidobacteria]	o__RB41	f__unidentified_RB41	g__unidentified_RB41	s__unidentified_RB41	4421238
OTU4360	21	51	0	2	0	0	0	7	0	0	0	0	3	2	0	0	0	0	0	0	40	5	0	1	0	0	0	0	0	0	0	0	0	0	0	0	k__Bacteria	p__Acidobacteria	c__[Chloracidobacteria]	o__RB41	f__unidentified_RB41	g__unidentified_RB41	s__unidentified_RB41	511024
OTU7453	9	12	1	3	0	0	0	0	2	0	0	4	24	11	11	5	1	0	0	1	16	3	1	10	0	0	0	0	0	0	0	0	0	0	0	0	k__Bacteria	p__Acidobacteria	c__[Chloracidobacteria]	o__RB41	f__unidentified_RB41	g__unidentified_RB41	s__unidentified_RB41	275105
OTU3134	5	9	0	0	0	0	0	0	0	0	0	0	6	7	4	10	0	0	4	6	23	13	0	11	0	0	0	0	0	0	0	0	0	0	0	0	k__Bacteria	p__Acidobacteria	c__[Chloracidobacteria]	o__RB41	f__unidentified_RB41	g__unidentified_RB41	s__unidentified_RB41	550467
OTU3203	0	0	0	1	0	0	0	0	1	0	9	11	6	0	0	0	25	5	0	0	13	0	0	0	0	0	0	0	0	0	0	0	0	0	0	0	k__Bacteria	p__Acidobacteria	c__[Chloracidobacteria]	o__RB41	f__unidentified_RB41	g__unidentified_RB41	s__unidentified_RB41	820987
OTU4583	1	1	0	0	1	0	0	1	0	0	0	1	36	0	2	1	0	0	17	1	0	0	0	3	0	0	0	0	0	0	0	0	0	0	0	0	k__Bacteria	p__Acidobacteria	c__[Chloracidobacteria]	o__RB41	f__unidentified_RB41	g__unidentified_RB41	s__unidentified_RB41	582611
OTU8689	10	5	0	4	0	0	0	0	0	0	0	4	16	7	6	0	0	0	0	1	5	0	0	4	0	0	0	0	0	0	0	0	0	0	0	0	k__Bacteria	p__Acidobacteria	c__[Chloracidobacteria]	o__RB41	f__unidentified_RB41	g__unidentified_RB41	s__unidentified_RB41	4346060
OTU7664	2	2	0	0	2	0	0	0	1	0	0	1	1	11	12	4	0	0	1	1	0	2	0	20	0	0	0	0	0	0	0	0	0	0	0	0	k__Bacteria	p__Acidobacteria	c__[Chloracidobacteria]	o__RB41	f__unidentified_RB41	g__unidentified_RB41	s__unidentified_RB41	3639039
OTU17374	8	11	1	3	3	0	0	1	0	1	0	2	0	7	3	2	0	0	3	0	3	2	2	7	0	0	0	0	0	0	0	0	0	0	0	0	k__Bacteria	p__Acidobacteria	c__[Chloracidobacteria]	o__RB41	f__unidentified_RB41	g__unidentified_RB41	s__unidentified_RB41	New.CleanUp.ReferenceOTU30138
OTU11280	2	3	0	0	0	0	0	0	0	0	0	5	3	15	10	0	0	0	5	2	0	0	0	1	0	0	0	0	0	0	0	0	0	0	0	0	k__Bacteria	p__Acidobacteria	c__[Chloracidobacteria]	o__RB41	f__unidentified_RB41	g__unidentified_RB41	s__unidentified_RB41	1108390
OTU9591	4	2	2	0	0	0	0	0	0	0	0	1	2	5	11	1	0	0	2	7	0	0	0	0	0	0	0	0	0	0	0	0	0	1	0	0	k__Bacteria	p__Acidobacteria	c__[Chloracidobacteria]	o__RB41	f__unidentified_RB41	g__unidentified_RB41	s__unidentified_RB41	548626
OTU2793	4	0	0	0	0	0	0	0	0	0	0	0	0	1	7	0	0	0	0	1	0	0	0	24	0	0	0	0	0	0	0	0	0	0	0	0	k__Bacteria	p__Acidobacteria	c__[Chloracidobacteria]	o__RB41	f__unidentified_RB41	g__unidentified_RB41	s__unidentified_RB41	4346058
OTU2128	13	1	0	0	0	0	0	0	0	0	0	0	4	6	0	1	0	0	1	0	0	0	0	7	0	0	0	0	0	0	0	0	0	0	0	0	k__Bacteria	p__Acidobacteria	c__[Chloracidobacteria]	o__RB41	f__unidentified_RB41	g__unidentified_RB41	s__unidentified_RB41	759250
OTU4639	1	0	0	0	15	0	0	0	3	0	2	1	0	0	0	0	0	0	0	3	6	1	0	0	0	0	0	0	0	0	0	0	0	0	0	0	k__Bacteria	p__Acidobacteria	c__[Chloracidobacteria]	o__RB41	f__unidentified_RB41	g__unidentified_RB41	s__unidentified_RB41	226364
OTU47190	3	4	0	0	0	0	0	0	0	0	0	0	3	4	3	0	0	0	1	0	5	5	1	2	0	0	0	0	0	0	0	0	0	0	0	0	k__Bacteria	p__Acidobacteria	c__[Chloracidobacteria]	o__RB41	f__unidentified_RB41	g__unidentified_RB41	s__unidentified_RB41	New.CleanUp.ReferenceOTU219065
OTU2837	2	1	1	0	0	0	0	0	0	0	0	0	0	0	0	0	0	0	0	0	21	4	0	0	0	0	0	0	0	0	0	0	0	0	0	0	k__Bacteria	p__Acidobacteria	c__[Chloracidobacteria]	o__RB41	f__unidentified_RB41	g__unidentified_RB41	s__unidentified_RB41	213944
OTU10495	1	1	0	0	0	0	0	0	0	0	0	0	0	0	2	4	0	0	0	0	16	0	0	3	0	0	0	0	0	0	0	0	0	0	0	0	k__Bacteria	p__Acidobacteria	c__[Chloracidobacteria]	o__RB41	f__unidentified_RB41	g__unidentified_RB41	s__unidentified_RB41	4313359
OTU46	7	14	0	0	3	0	0	0	0	0	0	0	0	2	0	0	0	0	0	0	0	0	0	0	0	0	0	0	0	0	0	0	0	0	0	0	k__Bacteria	p__Acidobacteria	c__[Chloracidobacteria]	o__RB41	f__unidentified_RB41	g__unidentified_RB41	s__unidentified_RB41	697997
OTU3409	3	0	1	0	0	0	0	0	0	0	0	6	6	0	0	0	0	0	5	0	0	0	0	1	0	0	0	0	0	0	0	0	0	0	0	0	k__Bacteria	p__Acidobacteria	c__[Chloracidobacteria]	o__RB41	f__unidentified_RB41	g__unidentified_RB41	s__unidentified_RB41	735782
OTU4533	1	0	0	0	0	0	0	0	0	0	0	0	1	0	1	5	0	0	0	0	5	0	0	8	0	0	0	0	0	0	0	0	0	0	0	0	k__Bacteria	p__Acidobacteria	c__[Chloracidobacteria]	o__RB41	f__unidentified_RB41	g__unidentified_RB41	s__unidentified_RB41	245951
OTU11263	14	3	0	0	0	0	0	0	0	0	0	0	0	0	0	1	0	0	0	0	0	0	0	1	0	0	0	0	0	0	0	0	0	0	0	0	k__Bacteria	p__Acidobacteria	c__[Chloracidobacteria]	o__RB41	f__unidentified_RB41	g__unidentified_RB41	s__unidentified_RB41	548079
OTU36604	0	0	1	3	0	0	0	0	1	0	0	0	1	1	0	0	0	0	3	0	5	1	1	0	0	0	0	0	0	0	0	0	0	0	0	0	k__Bacteria	p__Acidobacteria	c__[Chloracidobacteria]	o__RB41	f__unidentified_RB41	g__unidentified_RB41	s__unidentified_RB41	New.CleanUp.ReferenceOTU153866
OTU6876	3	0	0	0	0	0	0	0	0	0	0	0	0	3	0	1	0	0	0	0	1	0	0	5	0	0	0	0	0	0	0	0	0	0	0	0	k__Bacteria	p__Acidobacteria	c__[Chloracidobacteria]	o__RB41	f__unidentified_RB41	g__unidentified_RB41	s__unidentified_RB41	1137578
OTU54800	1	0	0	2	1	0	0	1	2	0	0	0	1	1	0	0	0	0	1	0	1	1	0	0	0	0	0	0	0	0	0	0	0	0	0	0	k__Bacteria	p__Acidobacteria	c__[Chloracidobacteria]	o__RB41	f__unidentified_RB41	g__unidentified_RB41	s__unidentified_RB41	New.CleanUp.ReferenceOTU266389
OTU10414	0	0	2	0	0	0	0	0	0	0	0	0	0	0	4	0	0	0	2	1	2	0	0	0	0	0	0	0	0	0	0	0	0	0	0	0	k__Bacteria	p__Acidobacteria	c__[Chloracidobacteria]	o__RB41	f__unidentified_RB41	g__unidentified_RB41	s__unidentified_RB41	584174
OTU10553	0	0	0	0	0	0	0	0	0	0	4	7	0	0	0	0	0	0	0	0	0	0	0	0	0	0	0	0	0	0	0	0	0	0	0	0	k__Bacteria	p__Acidobacteria	c__[Chloracidobacteria]	o__RB41	f__unidentified_RB41	g__unidentified_RB41	s__unidentified_RB41	4320239
OTU280	0	0	0	0	3	0	0	0	0	1	0	0	0	0	0	0	0	0	1	0	2	1	0	0	0	0	0	0	0	0	0	0	0	0	0	0	k__Bacteria	p__Acidobacteria	c__[Chloracidobacteria]	o__RB41	f__unidentified_RB41	g__unidentified_RB41	s__unidentified_RB41	741312
OTU51324	0	1	0	0	0	0	0	0	0	0	0	0	0	0	0	0	0	0	0	3	2	1	1	0	0	0	0	0	0	0	0	0	0	0	0	0	k__Bacteria	p__Acidobacteria	c__[Chloracidobacteria]	o__RB41	f__unidentified_RB41	g__unidentified_RB41	s__unidentified_RB41	New.CleanUp.ReferenceOTU244523
OTU55068	0	1	0	0	0	0	0	0	0	0	0	1	0	0	2	0	0	0	3	0	0	0	0	0	0	0	0	0	0	0	0	0	0	0	0	0	k__Bacteria	p__Acidobacteria	c__[Chloracidobacteria]	o__RB41	f__unidentified_RB41	g__unidentified_RB41	s__unidentified_RB41	New.CleanUp.ReferenceOTU268159
OTU1158	0	0	0	0	0	0	0	0	0	0	0	0	0	0	0	6	0	0	0	0	0	0	0	0	0	0	0	0	0	0	0	0	0	0	0	0	k__Bacteria	p__Acidobacteria	c__[Chloracidobacteria]	o__RB41	f__unidentified_RB41	g__unidentified_RB41	s__unidentified_RB41	4440638
OTU1803	1	0	0	0	0	0	0	0	0	0	0	0	0	0	1	0	0	0	0	0	4	0	0	0	0	0	0	0	0	0	0	0	0	0	0	0	k__Bacteria	p__Acidobacteria	c__[Chloracidobacteria]	o__RB41	f__unidentified_RB41	g__unidentified_RB41	s__unidentified_RB41	731546
OTU2806	2	4	0	0	0	0	0	0	0	0	0	0	0	0	0	0	0	0	0	0	0	0	0	0	0	0	0	0	0	0	0	0	0	0	0	0	k__Bacteria	p__Acidobacteria	c__[Chloracidobacteria]	o__RB41	f__unidentified_RB41	g__unidentified_RB41	s__unidentified_RB41	246893
OTU42453	1	4	0	0	0	0	0	1	0	0	0	0	0	0	0	0	0	0	0	0	0	0	0	0	0	0	0	0	0	0	0	0	0	0	0	0	k__Bacteria	p__Acidobacteria	c__[Chloracidobacteria]	o__RB41	f__unidentified_RB41	g__unidentified_RB41	s__unidentified_RB41	New.CleanUp.ReferenceOTU190487
OTU56114	0	0	0	0	0	0	0	0	0	0	1	0	0	0	0	0	4	1	0	0	0	0	0	0	0	0	0	0	0	0	0	0	0	0	0	0	k__Bacteria	p__Acidobacteria	c__[Chloracidobacteria]	o__RB41	f__unidentified_RB41	g__unidentified_RB41	s__unidentified_RB41	New.CleanUp.ReferenceOTU274545
OTU2579	0	0	0	0	0	0	0	0	0	0	0	0	0	0	0	0	0	0	0	0	4	1	0	0	0	0	0	0	0	0	0	0	0	0	0	0	k__Bacteria	p__Acidobacteria	c__[Chloracidobacteria]	o__RB41	f__unidentified_RB41	g__unidentified_RB41	s__unidentified_RB41	587975
OTU29073	0	0	0	0	0	0	0	0	0	0	0	0	1	2	0	0	0	0	1	0	0	0	0	1	0	0	0	0	0	0	0	0	0	0	0	0	k__Bacteria	p__Acidobacteria	c__[Chloracidobacteria]	o__RB41	f__unidentified_RB41	g__unidentified_RB41	s__unidentified_RB41	New.CleanUp.ReferenceOTU104545
OTU55910	0	0	0	0	0	0	0	0	0	0	0	0	2	0	0	0	0	0	1	0	0	1	1	0	0	0	0	0	0	0	0	0	0	0	0	0	k__Bacteria	p__Acidobacteria	c__[Chloracidobacteria]	o__RB41	f__unidentified_RB41	g__unidentified_RB41	s__unidentified_RB41	New.CleanUp.ReferenceOTU273288
OTU1383	0	0	0	0	0	0	0	0	0	0	0	0	0	0	0	4	0	0	0	0	0	0	0	0	0	0	0	0	0	0	0	0	0	0	0	0	k__Bacteria	p__Acidobacteria	c__[Chloracidobacteria]	o__RB41	f__unidentified_RB41	g__unidentified_RB41	s__unidentified_RB41	306532
OTU4105	1	0	0	0	0	0	0	0	0	0	1	0	0	0	1	0	0	0	0	0	1	0	0	0	0	0	0	0	0	0	0	0	0	0	0	0	k__Bacteria	p__Acidobacteria	c__[Chloracidobacteria]	o__RB41	f__unidentified_RB41	g__unidentified_RB41	s__unidentified_RB41	607006
OTU15581	2	0	0	0	0	0	0	0	0	0	0	0	0	0	0	0	0	0	0	1	1	0	0	0	0	0	0	0	0	0	0	0	0	0	0	0	k__Bacteria	p__Acidobacteria	c__[Chloracidobacteria]	o__RB41	f__unidentified_RB41	g__unidentified_RB41	s__unidentified_RB41	New.CleanUp.ReferenceOTU19322
OTU21675	3	0	0	0	0	0	0	0	0	0	0	0	0	0	0	0	0	0	0	0	1	0	0	0	0	0	0	0	0	0	0	0	0	0	0	0	k__Bacteria	p__Acidobacteria	c__[Chloracidobacteria]	o__RB41	f__unidentified_RB41	g__unidentified_RB41	s__unidentified_RB41	New.CleanUp.ReferenceOTU56594
OTU61567	0	0	0	1	0	0	0	1	0	0	0	0	0	0	0	0	0	0	0	1	0	0	1	0	0	0	0	0	0	0	0	0	0	0	0	0	k__Bacteria	p__Acidobacteria	c__[Chloracidobacteria]	o__RB41	f__unidentified_RB41	g__unidentified_RB41	s__unidentified_RB41	New.CleanUp.ReferenceOTU308765
OTU61882	1	0	0	0	0	0	0	0	0	0	0	0	0	0	1	0	0	0	0	0	0	0	0	2	0	0	0	0	0	0	0	0	0	0	0	0	k__Bacteria	p__Acidobacteria	c__[Chloracidobacteria]	o__RB41	f__unidentified_RB41	g__unidentified_RB41	s__unidentified_RB41	New.CleanUp.ReferenceOTU310775
OTU5545	0	0	0	0	3	0	0	0	0	0	0	0	0	0	0	0	0	0	0	0	0	0	0	0	0	0	0	0	0	0	0	0	0	0	0	0	k__Bacteria	p__Acidobacteria	c__[Chloracidobacteria]	o__RB41	f__unidentified_RB41	g__unidentified_RB41	s__unidentified_RB41	4405449
OTU6797	0	0	0	0	0	0	0	0	0	0	0	0	0	0	0	2	0	0	0	0	0	0	0	1	0	0	0	0	0	0	0	0	0	0	0	0	k__Bacteria	p__Acidobacteria	c__[Chloracidobacteria]	o__RB41	f__unidentified_RB41	g__unidentified_RB41	s__unidentified_RB41	664216
OTU7289	0	0	0	0	0	0	0	0	0	0	0	0	0	0	0	0	0	0	0	0	3	0	0	0	0	0	0	0	0	0	0	0	0	0	0	0	k__Bacteria	p__Acidobacteria	c__[Chloracidobacteria]	o__RB41	f__unidentified_RB41	g__unidentified_RB41	s__unidentified_RB41	759440
OTU25168	1	1	0	0	0	0	0	0	0	0	0	0	0	0	0	0	0	0	0	0	1	0	0	0	0	0	0	0	0	0	0	0	0	0	0	0	k__Bacteria	p__Acidobacteria	c__[Chloracidobacteria]	o__RB41	f__unidentified_RB41	g__unidentified_RB41	s__unidentified_RB41	New.CleanUp.ReferenceOTU78809
OTU51981	0	0	0	0	0	0	0	0	0	0	0	0	0	0	2	0	0	0	0	0	0	0	0	0	0	0	0	0	0	0	0	1	0	0	0	0	k__Bacteria	p__Acidobacteria	c__[Chloracidobacteria]	o__RB41	f__unidentified_RB41	g__unidentified_RB41	s__unidentified_RB41	New.CleanUp.ReferenceOTU248630
OTU54582	0	0	0	0	0	0	0	0	0	0	0	0	0	1	0	2	0	0	0	0	0	0	0	0	0	0	0	0	0	0	0	0	0	0	0	0	k__Bacteria	p__Acidobacteria	c__[Chloracidobacteria]	o__RB41	f__unidentified_RB41	g__unidentified_RB41	s__unidentified_RB41	New.CleanUp.ReferenceOTU264843
OTU61395	1	1	0	0	0	0	0	1	0	0	0	0	0	0	0	0	0	0	0	0	0	0	0	0	0	0	0	0	0	0	0	0	0	0	0	0	k__Bacteria	p__Acidobacteria	c__[Chloracidobacteria]	o__RB41	f__unidentified_RB41	g__unidentified_RB41	s__unidentified_RB41	New.CleanUp.ReferenceOTU307567
OTU3720	0	0	0	0	0	0	0	0	0	0	0	0	0	2	0	0	0	0	0	0	0	0	0	0	0	0	0	0	0	0	0	0	0	0	0	0	k__Bacteria	p__Acidobacteria	c__[Chloracidobacteria]	o__RB41	f__unidentified_RB41	g__unidentified_RB41	s__unidentified_RB41	619848
OTU10779	0	0	0	0	0	0	0	0	0	0	0	0	0	0	0	2	0	0	0	0	0	0	0	0	0	0	0	0	0	0	0	0	0	0	0	0	k__Bacteria	p__Acidobacteria	c__[Chloracidobacteria]	o__RB41	f__unidentified_RB41	g__unidentified_RB41	s__unidentified_RB41	4309801
OTU14030	1	0	0	0	0	0	0	0	0	0	0	0	0	0	0	0	0	0	0	0	0	0	1	0	0	0	0	0	0	0	0	0	0	0	0	0	k__Bacteria	p__Acidobacteria	c__[Chloracidobacteria]	o__RB41	f__unidentified_RB41	g__unidentified_RB41	s__unidentified_RB41	New.CleanUp.ReferenceOTU9996
OTU24439	0	0	0	0	0	0	0	0	0	0	0	0	0	0	0	0	0	0	1	0	0	0	1	0	0	0	0	0	0	0	0	0	0	0	0	0	k__Bacteria	p__Acidobacteria	c__[Chloracidobacteria]	o__RB41	f__unidentified_RB41	g__unidentified_RB41	s__unidentified_RB41	New.CleanUp.ReferenceOTU74179
OTU26358	1	0	0	1	0	0	0	0	0	0	0	0	0	0	0	0	0	0	0	0	0	0	0	0	0	0	0	0	0	0	0	0	0	0	0	0	k__Bacteria	p__Acidobacteria	c__[Chloracidobacteria]	o__RB41	f__unidentified_RB41	g__unidentified_RB41	s__unidentified_RB41	New.CleanUp.ReferenceOTU86622
OTU26679	0	0	0	0	0	0	0	0	0	0	0	0	0	0	0	0	0	0	0	0	0	1	1	0	0	0	0	0	0	0	0	0	0	0	0	0	k__Bacteria	p__Acidobacteria	c__[Chloracidobacteria]	o__RB41	f__unidentified_RB41	g__unidentified_RB41	s__unidentified_RB41	New.CleanUp.ReferenceOTU88729
OTU28260	1	0	0	0	0	0	0	0	0	0	0	0	0	1	0	0	0	0	0	0	0	0	0	0	0	0	0	0	0	0	0	0	0	0	0	0	k__Bacteria	p__Acidobacteria	c__[Chloracidobacteria]	o__RB41	f__unidentified_RB41	g__unidentified_RB41	s__unidentified_RB41	New.CleanUp.ReferenceOTU99153
OTU32523	0	0	1	0	0	0	0	0	0	0	1	0	0	0	0	0	0	0	0	0	0	0	0	0	0	0	0	0	0	0	0	0	0	0	0	0	k__Bacteria	p__Acidobacteria	c__[Chloracidobacteria]	o__RB41	f__unidentified_RB41	g__unidentified_RB41	s__unidentified_RB41	New.CleanUp.ReferenceOTU126837
OTU34091	0	1	0	0	0	0	0	0	0	0	0	0	0	0	0	0	0	0	0	0	1	0	0	0	0	0	0	0	0	0	0	0	0	0	0	0	k__Bacteria	p__Acidobacteria	c__[Chloracidobacteria]	o__RB41	f__unidentified_RB41	g__unidentified_RB41	s__unidentified_RB41	New.CleanUp.ReferenceOTU137351
OTU38286	0	0	0	0	0	0	0	0	0	0	0	0	0	0	0	0	0	0	0	0	1	0	1	0	0	0	0	0	0	0	0	0	0	0	0	0	k__Bacteria	p__Acidobacteria	c__[Chloracidobacteria]	o__RB41	f__unidentified_RB41	g__unidentified_RB41	s__unidentified_RB41	New.CleanUp.ReferenceOTU165017
OTU43056	2	0	0	0	0	0	0	0	0	0	0	0	0	0	0	0	0	0	0	0	0	0	0	0	0	0	0	0	0	0	0	0	0	0	0	0	k__Bacteria	p__Acidobacteria	c__[Chloracidobacteria]	o__RB41	f__unidentified_RB41	g__unidentified_RB41	s__unidentified_RB41	New.CleanUp.ReferenceOTU193922
OTU49627	0	0	0	0	0	0	0	0	0	0	0	0	1	0	0	0	0	0	0	0	1	0	0	0	0	0	0	0	0	0	0	0	0	0	0	0	k__Bacteria	p__Acidobacteria	c__[Chloracidobacteria]	o__RB41	f__unidentified_RB41	g__unidentified_RB41	s__unidentified_RB41	New.CleanUp.ReferenceOTU234041
OTU50335	1	0	0	0	0	0	0	0	0	0	0	0	1	0	0	0	0	0	0	0	0	0	0	0	0	0	0	0	0	0	0	0	0	0	0	0	k__Bacteria	p__Acidobacteria	c__[Chloracidobacteria]	o__RB41	f__unidentified_RB41	g__unidentified_RB41	s__unidentified_RB41	New.CleanUp.ReferenceOTU238525
OTU59556	0	0	0	2	0	0	0	0	0	0	0	0	0	0	0	0	0	0	0	0	0	0	0	0	0	0	0	0	0	0	0	0	0	0	0	0	k__Bacteria	p__Acidobacteria	c__[Chloracidobacteria]	o__RB41	f__unidentified_RB41	g__unidentified_RB41	s__unidentified_RB41	New.CleanUp.ReferenceOTU296141
OTU64450	2	0	0	0	0	0	0	0	0	0	0	0	0	0	0	0	0	0	0	0	0	0	0	0	0	0	0	0	0	0	0	0	0	0	0	0	k__Bacteria	p__Acidobacteria	c__[Chloracidobacteria]	o__RB41	f__unidentified_RB41	g__unidentified_RB41	s__unidentified_RB41	New.CleanUp.ReferenceOTU327453
OTU2829	0	0	0	0	0	0	0	0	0	0	0	0	0	0	0	1	0	0	0	0	0	0	0	0	0	0	0	0	0	0	0	0	0	0	0	0	k__Bacteria	p__Acidobacteria	c__[Chloracidobacteria]	o__RB41	f__unidentified_RB41	g__unidentified_RB41	s__unidentified_RB41	4457893
OTU3178	0	0	0	0	0	0	0	0	0	0	0	0	0	0	0	0	0	0	0	0	1	0	0	0	0	0	0	0	0	0	0	0	0	0	0	0	k__Bacteria	p__Acidobacteria	c__[Chloracidobacteria]	o__RB41	f__unidentified_RB41	g__unidentified_RB41	s__unidentified_RB41	572890
OTU3499	0	0	0	0	0	0	0	0	0	0	0	0	0	0	0	1	0	0	0	0	0	0	0	0	0	0	0	0	0	0	0	0	0	0	0	0	k__Bacteria	p__Acidobacteria	c__[Chloracidobacteria]	o__RB41	f__unidentified_RB41	g__unidentified_RB41	s__unidentified_RB41	539334
OTU5944	0	0	0	0	0	0	0	0	0	0	1	0	0	0	0	0	0	0	0	0	0	0	0	0	0	0	0	0	0	0	0	0	0	0	0	0	k__Bacteria	p__Acidobacteria	c__[Chloracidobacteria]	o__RB41	f__unidentified_RB41	g__unidentified_RB41	s__unidentified_RB41	697989
OTU8789	0	0	0	0	0	0	0	0	0	0	1	0	0	0	0	0	0	0	0	0	0	0	0	0	0	0	0	0	0	0	0	0	0	0	0	0	k__Bacteria	p__Acidobacteria	c__[Chloracidobacteria]	o__RB41	f__unidentified_RB41	g__unidentified_RB41	s__unidentified_RB41	144752
OTU14334	0	0	0	0	0	0	0	0	0	0	0	0	0	0	0	0	0	0	0	0	1	0	0	0	0	0	0	0	0	0	0	0	0	0	0	0	k__Bacteria	p__Acidobacteria	c__[Chloracidobacteria]	o__RB41	f__unidentified_RB41	g__unidentified_RB41	s__unidentified_RB41	New.CleanUp.ReferenceOTU11769
OTU15544	0	0	0	0	1	0	0	0	0	0	0	0	0	0	0	0	0	0	0	0	0	0	0	0	0	0	0	0	0	0	0	0	0	0	0	0	k__Bacteria	p__Acidobacteria	c__[Chloracidobacteria]	o__RB41	f__unidentified_RB41	g__unidentified_RB41	s__unidentified_RB41	New.CleanUp.ReferenceOTU19030
OTU28515	0	0	0	0	0	0	0	0	0	0	0	0	0	0	1	0	0	0	0	0	0	0	0	0	0	0	0	0	0	0	0	0	0	0	0	0	k__Bacteria	p__Acidobacteria	c__[Chloracidobacteria]	o__RB41	f__unidentified_RB41	g__unidentified_RB41	s__unidentified_RB41	New.CleanUp.ReferenceOTU100702
OTU29298	0	0	0	0	0	0	0	0	0	0	0	0	0	0	0	0	0	0	1	0	0	0	0	0	0	0	0	0	0	0	0	0	0	0	0	0	k__Bacteria	p__Acidobacteria	c__[Chloracidobacteria]	o__RB41	f__unidentified_RB41	g__unidentified_RB41	s__unidentified_RB41	New.CleanUp.ReferenceOTU106075
OTU32643	0	0	0	0	0	0	0	0	0	0	0	0	0	0	0	0	0	0	0	0	0	0	0	1	0	0	0	0	0	0	0	0	0	0	0	0	k__Bacteria	p__Acidobacteria	c__[Chloracidobacteria]	o__RB41	f__unidentified_RB41	g__unidentified_RB41	s__unidentified_RB41	New.CleanUp.ReferenceOTU127651
OTU38620	0	0	0	0	1	0	0	0	0	0	0	0	0	0	0	0	0	0	0	0	0	0	0	0	0	0	0	0	0	0	0	0	0	0	0	0	k__Bacteria	p__Acidobacteria	c__[Chloracidobacteria]	o__RB41	f__unidentified_RB41	g__unidentified_RB41	s__unidentified_RB41	New.CleanUp.ReferenceOTU167210
OTU39048	0	1	0	0	0	0	0	0	0	0	0	0	0	0	0	0	0	0	0	0	0	0	0	0	0	0	0	0	0	0	0	0	0	0	0	0	k__Bacteria	p__Acidobacteria	c__[Chloracidobacteria]	o__RB41	f__unidentified_RB41	g__unidentified_RB41	s__unidentified_RB41	New.CleanUp.ReferenceOTU170166
OTU41544	0	0	0	1	0	0	0	0	0	0	0	0	0	0	0	0	0	0	0	0	0	0	0	0	0	0	0	0	0	0	0	0	0	0	0	0	k__Bacteria	p__Acidobacteria	c__[Chloracidobacteria]	o__RB41	f__unidentified_RB41	g__unidentified_RB41	s__unidentified_RB41	New.CleanUp.ReferenceOTU184949
OTU43169	0	0	0	0	0	0	0	0	1	0	0	0	0	0	0	0	0	0	0	0	0	0	0	0	0	0	0	0	0	0	0	0	0	0	0	0	k__Bacteria	p__Acidobacteria	c__[Chloracidobacteria]	o__RB41	f__unidentified_RB41	g__unidentified_RB41	s__unidentified_RB41	New.CleanUp.ReferenceOTU194557
OTU46844	0	0	0	0	0	0	0	0	0	0	0	0	0	0	0	0	0	0	1	0	0	0	0	0	0	0	0	0	0	0	0	0	0	0	0	0	k__Bacteria	p__Acidobacteria	c__[Chloracidobacteria]	o__RB41	f__unidentified_RB41	g__unidentified_RB41	s__unidentified_RB41	New.CleanUp.ReferenceOTU217002
OTU47431	0	0	0	0	0	0	0	0	0	0	0	0	0	0	0	0	0	0	0	1	0	0	0	0	0	0	0	0	0	0	0	0	0	0	0	0	k__Bacteria	p__Acidobacteria	c__[Chloracidobacteria]	o__RB41	f__unidentified_RB41	g__unidentified_RB41	s__unidentified_RB41	New.CleanUp.ReferenceOTU220436
OTU48059	0	0	0	0	0	0	0	0	0	0	0	1	0	0	0	0	0	0	0	0	0	0	0	0	0	0	0	0	0	0	0	0	0	0	0	0	k__Bacteria	p__Acidobacteria	c__[Chloracidobacteria]	o__RB41	f__unidentified_RB41	g__unidentified_RB41	s__unidentified_RB41	New.CleanUp.ReferenceOTU224519
OTU48081	0	0	0	0	0	0	0	0	1	0	0	0	0	0	0	0	0	0	0	0	0	0	0	0	0	0	0	0	0	0	0	0	0	0	0	0	k__Bacteria	p__Acidobacteria	c__[Chloracidobacteria]	o__RB41	f__unidentified_RB41	g__unidentified_RB41	s__unidentified_RB41	New.CleanUp.ReferenceOTU224690
OTU51181	0	0	0	0	0	0	0	0	0	0	0	0	0	0	0	0	0	0	0	0	1	0	0	0	0	0	0	0	0	0	0	0	0	0	0	0	k__Bacteria	p__Acidobacteria	c__[Chloracidobacteria]	o__RB41	f__unidentified_RB41	g__unidentified_RB41	s__unidentified_RB41	New.CleanUp.ReferenceOTU243644
OTU52836	0	0	0	0	0	0	0	1	0	0	0	0	0	0	0	0	0	0	0	0	0	0	0	0	0	0	0	0	0	0	0	0	0	0	0	0	k__Bacteria	p__Acidobacteria	c__[Chloracidobacteria]	o__RB41	f__unidentified_RB41	g__unidentified_RB41	s__unidentified_RB41	New.CleanUp.ReferenceOTU253813
OTU60371	0	0	0	0	0	0	0	0	0	0	0	0	0	0	0	0	0	0	0	0	1	0	0	0	0	0	0	0	0	0	0	0	0	0	0	0	k__Bacteria	p__Acidobacteria	c__[Chloracidobacteria]	o__RB41	f__unidentified_RB41	g__unidentified_RB41	s__unidentified_RB41	New.CleanUp.ReferenceOTU301040
OTU61231	0	0	0	0	0	0	0	0	0	0	0	0	0	0	1	0	0	0	0	0	0	0	0	0	0	0	0	0	0	0	0	0	0	0	0	0	k__Bacteria	p__Acidobacteria	c__[Chloracidobacteria]	o__RB41	f__unidentified_RB41	g__unidentified_RB41	s__unidentified_RB41	New.CleanUp.ReferenceOTU306539
OTU61601	0	0	0	0	0	0	0	1	0	0	0	0	0	0	0	0	0	0	0	0	0	0	0	0	0	0	0	0	0	0	0	0	0	0	0	0	k__Bacteria	p__Acidobacteria	c__[Chloracidobacteria]	o__RB41	f__unidentified_RB41	g__unidentified_RB41	s__unidentified_RB41	New.CleanUp.ReferenceOTU308967
OTU65754	0	1	0	0	0	0	0	0	0	0	0	0	0	0	0	0	0	0	0	0	0	0	0	0	0	0	0	0	0	0	0	0	0	0	0	0	k__Bacteria	p__Acidobacteria	c__[Chloracidobacteria]	o__RB41	f__unidentified_RB41	g__unidentified_RB41	s__unidentified_RB41	New.CleanUp.ReferenceOTU335830
OTU2146	56	24	22	10	46	9	23	37	6	3	11	37	30	18	29	12	18	2	45	42	53	12	8	11	0	1	0	0	0	0	0	0	0	0	0	5	k__Bacteria	p__Acidobacteria	c__[Chloracidobacteria]	o__RB41	f__Ellin6075	g__unidentified_Ellin6075	s__unidentified_Ellin6075	209250
OTU4977	16	81	34	31	48	10	11	20	30	12	10	19	31	2	15	1	11	9	37	32	54	13	6	3	0	3	3	0	0	0	1	8	6	3	1	1	k__Bacteria	p__Acidobacteria	c__[Chloracidobacteria]	o__RB41	f__Ellin6075	g__unidentified_Ellin6075	s__unidentified_Ellin6075	246449
OTU4095	1	2	57	26	3	2	22	51	31	15	2	1	46	2	2	0	67	27	45	20	27	12	12	0	0	1	0	0	0	0	0	0	1	4	9	11	k__Bacteria	p__Acidobacteria	c__[Chloracidobacteria]	o__RB41	f__Ellin6075	g__unidentified_Ellin6075	s__unidentified_Ellin6075	1876538
OTU8405	3	7	54	12	2	3	29	38	54	29	15	3	25	4	3	0	31	6	44	15	32	22	46	0	0	0	0	0	0	0	0	0	0	0	0	0	k__Bacteria	p__Acidobacteria	c__[Chloracidobacteria]	o__RB41	f__Ellin6075	g__unidentified_Ellin6075	s__unidentified_Ellin6075	593400
OTU6788	42	60	16	2	1	2	4	15	7	1	1	33	25	47	25	31	1	2	37	22	15	0	1	39	0	1	0	0	0	0	0	0	1	0	0	0	k__Bacteria	p__Acidobacteria	c__[Chloracidobacteria]	o__RB41	f__Ellin6075	g__unidentified_Ellin6075	s__unidentified_Ellin6075	4456633
OTU10152	51	33	7	0	0	0	0	0	0	0	0	7	18	44	37	36	0	0	0	10	0	0	0	58	0	0	0	0	0	0	0	0	0	0	0	0	k__Bacteria	p__Acidobacteria	c__[Chloracidobacteria]	o__RB41	f__Ellin6075	g__unidentified_Ellin6075	s__unidentified_Ellin6075	1925452
OTU1826	9	2	21	2	0	0	1	3	0	0	0	6	11	18	15	4	3	0	16	25	16	0	0	6	0	0	0	0	0	0	0	0	0	0	0	0	k__Bacteria	p__Acidobacteria	c__[Chloracidobacteria]	o__RB41	f__Ellin6075	g__unidentified_Ellin6075	s__unidentified_Ellin6075	1105005
OTU2313	2	4	9	2	6	0	5	12	9	3	9	2	10	0	4	2	14	10	3	4	2	5	12	0	0	0	0	0	0	0	0	0	0	1	0	1	k__Bacteria	p__Acidobacteria	c__[Chloracidobacteria]	o__RB41	f__Ellin6075	g__unidentified_Ellin6075	s__unidentified_Ellin6075	4445083
OTU7840	12	9	5	1	1	0	2	1	0	0	0	28	7	6	5	19	0	0	3	3	0	0	0	11	0	0	0	0	0	0	0	0	0	0	0	0	k__Bacteria	p__Acidobacteria	c__[Chloracidobacteria]	o__RB41	f__Ellin6075	g__unidentified_Ellin6075	s__unidentified_Ellin6075	4340706
OTU2063	2	2	13	12	5	1	11	1	7	0	1	8	1	1	1	0	0	2	3	5	10	2	0	0	0	0	0	0	0	0	0	0	0	0	0	0	k__Bacteria	p__Acidobacteria	c__[Chloracidobacteria]	o__RB41	f__Ellin6075	g__unidentified_Ellin6075	s__unidentified_Ellin6075	141861
OTU8096	3	8	1	1	7	0	2	5	1	0	0	14	13	1	10	2	0	1	3	9	5	0	0	0	0	0	0	0	0	0	0	0	0	0	0	0	k__Bacteria	p__Acidobacteria	c__[Chloracidobacteria]	o__RB41	f__Ellin6075	g__unidentified_Ellin6075	s__unidentified_Ellin6075	4391597
OTU4785	10	4	4	3	9	3	2	2	0	0	2	5	3	11	7	0	1	0	4	2	3	0	0	0	0	2	1	0	0	1	0	1	0	0	1	1	k__Bacteria	p__Acidobacteria	c__[Chloracidobacteria]	o__RB41	f__Ellin6075	g__unidentified_Ellin6075	s__unidentified_Ellin6075	113347
OTU10283	1	0	7	3	3	0	8	5	1	0	0	5	4	0	2	0	3	9	3	5	2	0	2	0	0	3	2	0	0	1	0	1	0	0	0	1	k__Bacteria	p__Acidobacteria	c__[Chloracidobacteria]	o__RB41	f__Ellin6075	g__unidentified_Ellin6075	s__unidentified_Ellin6075	209520
OTU6800	1	2	3	0	3	0	4	1	0	0	1	5	1	0	2	0	0	4	2	5	5	6	0	3	0	0	2	1	0	0	1	0	0	0	0	0	k__Bacteria	p__Acidobacteria	c__[Chloracidobacteria]	o__RB41	f__Ellin6075	g__unidentified_Ellin6075	s__unidentified_Ellin6075	281593
OTU172	0	0	0	0	0	1	2	0	0	0	0	0	0	0	0	22	0	0	1	0	0	0	0	10	0	0	0	0	0	0	0	0	0	0	1	0	k__Bacteria	p__Acidobacteria	c__[Chloracidobacteria]	o__RB41	f__Ellin6075	g__unidentified_Ellin6075	s__unidentified_Ellin6075	816705
OTU2201	0	0	0	0	6	4	10	0	4	1	1	0	1	0	0	0	3	0	0	1	4	0	2	0	0	0	0	0	0	0	0	0	0	0	0	0	k__Bacteria	p__Acidobacteria	c__[Chloracidobacteria]	o__RB41	f__Ellin6075	g__unidentified_Ellin6075	s__unidentified_Ellin6075	4425840
OTU9295	0	5	3	1	2	0	1	1	2	1	2	3	4	0	0	0	1	2	0	0	0	0	1	2	0	1	0	0	0	0	0	0	0	0	0	0	k__Bacteria	p__Acidobacteria	c__[Chloracidobacteria]	o__RB41	f__Ellin6075	g__unidentified_Ellin6075	s__unidentified_Ellin6075	510646
OTU7573	0	1	2	4	2	0	3	0	0	2	1	0	5	0	1	0	0	1	0	1	4	0	0	2	0	0	0	0	0	0	0	0	0	0	0	0	k__Bacteria	p__Acidobacteria	c__[Chloracidobacteria]	o__RB41	f__Ellin6075	g__unidentified_Ellin6075	s__unidentified_Ellin6075	806063
OTU9837	6	9	0	0	0	0	0	0	0	0	0	0	0	2	0	3	0	0	0	0	5	1	0	2	0	0	0	0	0	0	0	0	0	0	0	0	k__Bacteria	p__Acidobacteria	c__[Chloracidobacteria]	o__RB41	f__Ellin6075	g__unidentified_Ellin6075	s__unidentified_Ellin6075	4361327
OTU3695	0	0	1	0	2	2	0	3	3	1	0	1	0	0	0	0	1	4	4	0	0	1	1	0	0	0	0	0	0	0	0	0	2	0	1	0	k__Bacteria	p__Acidobacteria	c__[Chloracidobacteria]	o__RB41	f__Ellin6075	g__unidentified_Ellin6075	s__unidentified_Ellin6075	1132655
OTU10908	1	3	4	0	0	0	0	2	1	0	1	2	1	1	0	1	1	1	6	0	1	0	0	0	0	1	0	0	0	0	0	0	0	0	0	0	k__Bacteria	p__Acidobacteria	c__[Chloracidobacteria]	o__RB41	f__Ellin6075	g__unidentified_Ellin6075	s__unidentified_Ellin6075	3621721
OTU7860	0	1	2	1	0	0	2	1	1	0	1	1	2	0	0	0	2	1	3	2	1	1	4	0	0	0	0	0	0	0	0	0	0	0	0	0	k__Bacteria	p__Acidobacteria	c__[Chloracidobacteria]	o__RB41	f__Ellin6075	g__unidentified_Ellin6075	s__unidentified_Ellin6075	636687
OTU5206	2	0	0	2	1	0	0	1	0	0	0	6	3	0	2	0	1	0	2	0	1	0	0	3	0	0	0	0	0	0	0	0	0	0	0	0	k__Bacteria	p__Acidobacteria	c__[Chloracidobacteria]	o__RB41	f__Ellin6075	g__unidentified_Ellin6075	s__unidentified_Ellin6075	4308259
OTU7142	0	1	0	0	2	1	3	1	0	0	0	0	0	0	0	0	0	1	0	2	0	0	0	0	0	0	0	0	0	0	0	0	6	1	5	1	k__Bacteria	p__Acidobacteria	c__[Chloracidobacteria]	o__RB41	f__Ellin6075	g__unidentified_Ellin6075	s__unidentified_Ellin6075	807283
OTU10062	0	3	0	0	1	1	1	2	3	0	4	1	1	0	0	0	1	0	1	0	2	0	1	0	0	0	0	0	0	0	0	0	0	0	0	0	k__Bacteria	p__Acidobacteria	c__[Chloracidobacteria]	o__RB41	f__Ellin6075	g__unidentified_Ellin6075	s__unidentified_Ellin6075	4424552
OTU11094	2	0	0	2	6	2	0	0	1	0	0	0	0	1	0	0	0	0	2	1	0	0	0	2	0	0	0	0	0	0	0	0	1	0	0	0	k__Bacteria	p__Acidobacteria	c__[Chloracidobacteria]	o__RB41	f__Ellin6075	g__unidentified_Ellin6075	s__unidentified_Ellin6075	279872
OTU7584	0	0	2	0	0	0	0	0	1	0	0	6	1	0	2	0	0	0	0	0	1	0	0	5	0	0	0	0	0	0	0	0	0	0	0	0	k__Bacteria	p__Acidobacteria	c__[Chloracidobacteria]	o__RB41	f__Ellin6075	g__unidentified_Ellin6075	s__unidentified_Ellin6075	4432930
OTU8857	1	1	2	1	0	0	0	0	0	0	0	2	0	0	0	1	2	3	0	0	0	0	0	2	0	0	0	0	0	0	0	0	0	0	0	2	k__Bacteria	p__Acidobacteria	c__[Chloracidobacteria]	o__RB41	f__Ellin6075	g__unidentified_Ellin6075	s__unidentified_Ellin6075	4308300
OTU7521	1	2	1	0	0	0	0	0	0	0	0	0	1	3	0	7	0	0	0	0	0	0	0	0	0	1	0	0	0	0	0	0	0	0	0	0	k__Bacteria	p__Acidobacteria	c__[Chloracidobacteria]	o__RB41	f__Ellin6075	g__unidentified_Ellin6075	s__unidentified_Ellin6075	577215
OTU10776	2	0	1	0	0	0	0	0	0	0	0	3	1	2	3	2	0	0	1	1	0	0	0	0	0	0	0	0	0	0	0	0	0	0	0	0	k__Bacteria	p__Acidobacteria	c__[Chloracidobacteria]	o__RB41	f__Ellin6075	g__unidentified_Ellin6075	s__unidentified_Ellin6075	726866
OTU11154	2	2	1	0	0	0	0	0	0	0	0	0	0	3	2	4	0	0	0	0	0	0	0	2	0	0	0	0	0	0	0	0	0	0	0	0	k__Bacteria	p__Acidobacteria	c__[Chloracidobacteria]	o__RB41	f__Ellin6075	g__unidentified_Ellin6075	s__unidentified_Ellin6075	4339540
OTU3407	2	0	1	0	0	0	1	0	0	0	0	0	2	0	3	0	1	0	0	2	2	1	0	0	0	0	0	0	0	0	0	0	0	0	0	0	k__Bacteria	p__Acidobacteria	c__[Chloracidobacteria]	o__RB41	f__Ellin6075	g__unidentified_Ellin6075	s__unidentified_Ellin6075	4428562
OTU1982	1	3	5	0	0	0	0	0	0	0	0	0	0	1	0	1	0	0	0	0	0	0	0	0	0	1	0	1	0	0	0	0	0	0	0	0	k__Bacteria	p__Acidobacteria	c__[Chloracidobacteria]	o__RB41	f__Ellin6075	g__unidentified_Ellin6075	s__unidentified_Ellin6075	818461
OTU14356	0	0	3	2	0	0	0	0	0	0	0	0	0	0	0	0	0	4	0	1	0	0	0	0	0	0	0	0	0	0	0	0	0	0	0	0	k__Bacteria	p__Acidobacteria	c__[Chloracidobacteria]	o__RB41	f__Ellin6075	g__unidentified_Ellin6075	s__unidentified_Ellin6075	New.CleanUp.ReferenceOTU11905
OTU28408	0	0	0	1	0	1	0	0	1	0	0	1	0	0	1	0	0	0	0	0	0	1	1	0	0	0	0	0	0	0	0	0	0	0	0	0	k__Bacteria	p__Acidobacteria	c__[Chloracidobacteria]	o__RB41	f__Ellin6075	g__unidentified_Ellin6075	s__unidentified_Ellin6075	New.CleanUp.ReferenceOTU99999
OTU7797	0	0	1	0	0	0	0	0	0	0	0	1	0	1	0	1	0	0	0	0	2	0	0	0	0	0	0	0	0	0	0	0	0	0	0	0	k__Bacteria	p__Acidobacteria	c__[Chloracidobacteria]	o__RB41	f__Ellin6075	g__unidentified_Ellin6075	s__unidentified_Ellin6075	55946
OTU522	0	0	0	0	0	0	0	0	0	0	0	0	0	0	1	2	0	0	0	0	0	0	0	2	0	0	0	0	0	0	0	0	0	0	0	0	k__Bacteria	p__Acidobacteria	c__[Chloracidobacteria]	o__RB41	f__Ellin6075	g__unidentified_Ellin6075	s__unidentified_Ellin6075	4447049
OTU5214	0	0	0	0	0	0	1	0	0	0	0	0	0	0	0	0	0	0	0	1	0	0	0	0	0	0	0	0	0	0	0	0	0	0	0	3	k__Bacteria	p__Acidobacteria	c__[Chloracidobacteria]	o__RB41	f__Ellin6075	g__unidentified_Ellin6075	s__unidentified_Ellin6075	814295
OTU34853	0	0	1	0	0	0	0	0	0	0	0	0	0	0	0	0	0	4	0	0	0	0	0	0	0	0	0	0	0	0	0	0	0	0	0	0	k__Bacteria	p__Acidobacteria	c__[Chloracidobacteria]	o__RB41	f__Ellin6075	g__unidentified_Ellin6075	s__unidentified_Ellin6075	New.CleanUp.ReferenceOTU142118
OTU1770	0	0	1	0	0	0	0	0	0	0	0	0	0	0	2	0	0	0	0	0	0	0	0	0	0	0	0	0	0	0	0	0	0	0	0	0	k__Bacteria	p__Acidobacteria	c__[Chloracidobacteria]	o__RB41	f__Ellin6075	g__unidentified_Ellin6075	s__unidentified_Ellin6075	3854083
OTU2992	0	1	1	0	0	0	0	0	0	0	0	0	0	0	0	0	0	0	1	0	0	0	0	0	0	0	0	0	0	0	0	0	0	0	0	0	k__Bacteria	p__Acidobacteria	c__[Chloracidobacteria]	o__RB41	f__Ellin6075	g__unidentified_Ellin6075	s__unidentified_Ellin6075	113400
OTU3432	3	0	0	0	0	0	0	0	0	0	0	0	0	0	0	0	0	0	0	0	0	0	0	0	0	0	0	0	0	0	0	0	0	0	0	0	k__Bacteria	p__Acidobacteria	c__[Chloracidobacteria]	o__RB41	f__Ellin6075	g__unidentified_Ellin6075	s__unidentified_Ellin6075	696105
OTU8230	1	1	0	0	0	0	0	0	0	0	0	0	0	1	0	0	0	0	0	0	0	0	0	0	0	0	0	0	0	0	0	0	0	0	0	0	k__Bacteria	p__Acidobacteria	c__[Chloracidobacteria]	o__RB41	f__Ellin6075	g__unidentified_Ellin6075	s__unidentified_Ellin6075	1125708
OTU10515	0	0	0	0	0	0	0	0	0	0	0	0	0	0	0	0	0	0	0	0	0	0	0	0	0	0	1	2	0	0	0	0	0	0	0	0	k__Bacteria	p__Acidobacteria	c__[Chloracidobacteria]	o__RB41	f__Ellin6075	g__unidentified_Ellin6075	s__unidentified_Ellin6075	551480
OTU46510	0	0	0	0	0	0	0	1	0	0	0	0	0	0	0	0	0	0	0	0	2	0	0	0	0	0	0	0	0	0	0	0	0	0	0	0	k__Bacteria	p__Acidobacteria	c__[Chloracidobacteria]	o__RB41	f__Ellin6075	g__unidentified_Ellin6075	s__unidentified_Ellin6075	New.CleanUp.ReferenceOTU214962
OTU2818	1	0	0	0	0	0	0	0	0	0	0	0	0	0	0	1	0	0	0	0	0	0	0	0	0	0	0	0	0	0	0	0	0	0	0	0	k__Bacteria	p__Acidobacteria	c__[Chloracidobacteria]	o__RB41	f__Ellin6075	g__unidentified_Ellin6075	s__unidentified_Ellin6075	2017429
OTU3281	2	0	0	0	0	0	0	0	0	0	0	0	0	0	0	0	0	0	0	0	0	0	0	0	0	0	0	0	0	0	0	0	0	0	0	0	k__Bacteria	p__Acidobacteria	c__[Chloracidobacteria]	o__RB41	f__Ellin6075	g__unidentified_Ellin6075	s__unidentified_Ellin6075	4421933
OTU3408	0	0	0	0	0	0	0	0	0	0	0	0	0	0	0	2	0	0	0	0	0	0	0	0	0	0	0	0	0	0	0	0	0	0	0	0	k__Bacteria	p__Acidobacteria	c__[Chloracidobacteria]	o__RB41	f__Ellin6075	g__unidentified_Ellin6075	s__unidentified_Ellin6075	4428563
OTU4040	0	1	0	0	0	0	0	0	0	0	0	1	0	0	0	0	0	0	0	0	0	0	0	0	0	0	0	0	0	0	0	0	0	0	0	0	k__Bacteria	p__Acidobacteria	c__[Chloracidobacteria]	o__RB41	f__Ellin6075	g__unidentified_Ellin6075	s__unidentified_Ellin6075	590533
OTU4698	0	0	0	0	0	0	0	0	0	0	0	2	0	0	0	0	0	0	0	0	0	0	0	0	0	0	0	0	0	0	0	0	0	0	0	0	k__Bacteria	p__Acidobacteria	c__[Chloracidobacteria]	o__RB41	f__Ellin6075	g__unidentified_Ellin6075	s__unidentified_Ellin6075	4398400
OTU5046	1	0	0	0	0	0	0	0	0	0	1	0	0	0	0	0	0	0	0	0	0	0	0	0	0	0	0	0	0	0	0	0	0	0	0	0	k__Bacteria	p__Acidobacteria	c__[Chloracidobacteria]	o__RB41	f__Ellin6075	g__unidentified_Ellin6075	s__unidentified_Ellin6075	4443544
OTU7336	2	0	0	0	0	0	0	0	0	0	0	0	0	0	0	0	0	0	0	0	0	0	0	0	0	0	0	0	0	0	0	0	0	0	0	0	k__Bacteria	p__Acidobacteria	c__[Chloracidobacteria]	o__RB41	f__Ellin6075	g__unidentified_Ellin6075	s__unidentified_Ellin6075	4336201
OTU7514	0	0	2	0	0	0	0	0	0	0	0	0	0	0	0	0	0	0	0	0	0	0	0	0	0	0	0	0	0	0	0	0	0	0	0	0	k__Bacteria	p__Acidobacteria	c__[Chloracidobacteria]	o__RB41	f__Ellin6075	g__unidentified_Ellin6075	s__unidentified_Ellin6075	4275175
OTU10661	0	0	0	0	0	0	0	0	0	0	1	0	0	0	0	0	0	0	0	0	1	0	0	0	0	0	0	0	0	0	0	0	0	0	0	0	k__Bacteria	p__Acidobacteria	c__[Chloracidobacteria]	o__RB41	f__Ellin6075	g__unidentified_Ellin6075	s__unidentified_Ellin6075	151008
OTU22038	0	1	0	0	0	0	0	0	0	0	0	0	0	0	1	0	0	0	0	0	0	0	0	0	0	0	0	0	0	0	0	0	0	0	0	0	k__Bacteria	p__Acidobacteria	c__[Chloracidobacteria]	o__RB41	f__Ellin6075	g__unidentified_Ellin6075	s__unidentified_Ellin6075	New.CleanUp.ReferenceOTU58874
OTU64496	0	0	1	0	0	0	0	0	0	0	0	0	0	0	0	0	1	0	0	0	0	0	0	0	0	0	0	0	0	0	0	0	0	0	0	0	k__Bacteria	p__Acidobacteria	c__[Chloracidobacteria]	o__RB41	f__Ellin6075	g__unidentified_Ellin6075	s__unidentified_Ellin6075	New.CleanUp.ReferenceOTU327741
OTU184	0	0	0	0	1	0	0	0	0	0	0	0	0	0	0	0	0	0	0	0	0	0	0	0	0	0	0	0	0	0	0	0	0	0	0	0	k__Bacteria	p__Acidobacteria	c__[Chloracidobacteria]	o__RB41	f__Ellin6075	g__unidentified_Ellin6075	s__unidentified_Ellin6075	4397258
OTU3742	0	0	0	0	0	0	0	0	0	0	0	0	0	0	0	0	0	0	0	0	0	0	0	1	0	0	0	0	0	0	0	0	0	0	0	0	k__Bacteria	p__Acidobacteria	c__[Chloracidobacteria]	o__RB41	f__Ellin6075	g__unidentified_Ellin6075	s__unidentified_Ellin6075	4366781
OTU3956	0	0	1	0	0	0	0	0	0	0	0	0	0	0	0	0	0	0	0	0	0	0	0	0	0	0	0	0	0	0	0	0	0	0	0	0	k__Bacteria	p__Acidobacteria	c__[Chloracidobacteria]	o__RB41	f__Ellin6075	g__unidentified_Ellin6075	s__unidentified_Ellin6075	1120231
OTU10375	0	0	0	0	0	0	1	0	0	0	0	0	0	0	0	0	0	0	0	0	0	0	0	0	0	0	0	0	0	0	0	0	0	0	0	0	k__Bacteria	p__Acidobacteria	c__[Chloracidobacteria]	o__RB41	f__Ellin6075	g__unidentified_Ellin6075	s__unidentified_Ellin6075	113715
OTU22736	0	0	0	1	0	0	0	0	0	0	0	0	0	0	0	0	0	0	0	0	0	0	0	0	0	0	0	0	0	0	0	0	0	0	0	0	k__Bacteria	p__Acidobacteria	c__[Chloracidobacteria]	o__RB41	f__Ellin6075	g__unidentified_Ellin6075	s__unidentified_Ellin6075	New.CleanUp.ReferenceOTU63320
OTU23945	0	0	0	1	0	0	0	0	0	0	0	0	0	0	0	0	0	0	0	0	0	0	0	0	0	0	0	0	0	0	0	0	0	0	0	0	k__Bacteria	p__Acidobacteria	c__[Chloracidobacteria]	o__RB41	f__Ellin6075	g__unidentified_Ellin6075	s__unidentified_Ellin6075	New.CleanUp.ReferenceOTU71074
OTU30432	0	0	0	0	0	0	1	0	0	0	0	0	0	0	0	0	0	0	0	0	0	0	0	0	0	0	0	0	0	0	0	0	0	0	0	0	k__Bacteria	p__Acidobacteria	c__[Chloracidobacteria]	o__RB41	f__Ellin6075	g__unidentified_Ellin6075	s__unidentified_Ellin6075	New.CleanUp.ReferenceOTU113299
OTU36500	0	0	0	0	0	0	0	0	0	0	0	0	0	0	0	0	0	0	0	0	1	0	0	0	0	0	0	0	0	0	0	0	0	0	0	0	k__Bacteria	p__Acidobacteria	c__[Chloracidobacteria]	o__RB41	f__Ellin6075	g__unidentified_Ellin6075	s__unidentified_Ellin6075	New.CleanUp.ReferenceOTU153081
OTU54076	0	0	0	0	0	0	0	0	0	0	0	0	0	0	0	0	1	0	0	0	0	0	0	0	0	0	0	0	0	0	0	0	0	0	0	0	k__Bacteria	p__Acidobacteria	c__[Chloracidobacteria]	o__RB41	f__Ellin6075	g__unidentified_Ellin6075	s__unidentified_Ellin6075	New.CleanUp.ReferenceOTU261531
OTU5163	89	128	151	69	52	14	77	183	120	108	52	154	208	107	99	16	210	47	702	281	402	183	176	16	0	0	0	0	0	0	0	0	6	19	6	15	k__Bacteria	p__Acidobacteria	c__Acidobacteria-5	o__unidentified_Acidobacteria-5	f__unidentified_Acidobacteria-5	g__unidentified_Acidobacteria-5	s__unidentified_Acidobacteria-5	4392804
OTU6663	80	18	22	0	0	0	0	1	0	0	0	7	20	152	90	78	0	0	33	31	4	1	0	158	0	0	0	0	0	0	0	0	0	0	0	0	k__Bacteria	p__Acidobacteria	c__Acidobacteria-5	o__unidentified_Acidobacteria-5	f__unidentified_Acidobacteria-5	g__unidentified_Acidobacteria-5	s__unidentified_Acidobacteria-5	3609950
OTU11491	2	1	4	9	8	7	6	15	10	14	19	10	19	0	0	2	20	20	23	10	14	3	19	1	0	0	0	0	0	0	0	0	19	15	34	33	k__Bacteria	p__Acidobacteria	c__Acidobacteria-5	o__unidentified_Acidobacteria-5	f__unidentified_Acidobacteria-5	g__unidentified_Acidobacteria-5	s__unidentified_Acidobacteria-5	4401488
OTU9272	18	14	3	5	4	4	9	7	4	9	9	6	15	13	10	5	25	17	37	16	15	6	5	21	0	0	2	1	0	0	2	0	14	5	4	6	k__Bacteria	p__Acidobacteria	c__Acidobacteria-5	o__unidentified_Acidobacteria-5	f__unidentified_Acidobacteria-5	g__unidentified_Acidobacteria-5	s__unidentified_Acidobacteria-5	4019171
OTU3861	3	5	10	4	2	8	4	7	5	7	6	4	23	1	4	4	32	7	22	15	45	9	18	24	0	0	0	0	0	0	0	0	4	13	9	4	k__Bacteria	p__Acidobacteria	c__Acidobacteria-5	o__unidentified_Acidobacteria-5	f__unidentified_Acidobacteria-5	g__unidentified_Acidobacteria-5	s__unidentified_Acidobacteria-5	354337
OTU3553	19	6	20	3	1	0	0	5	0	0	2	11	34	20	17	22	7	0	50	39	18	2	0	15	0	1	0	0	0	0	0	0	0	0	0	0	k__Bacteria	p__Acidobacteria	c__Acidobacteria-5	o__unidentified_Acidobacteria-5	f__unidentified_Acidobacteria-5	g__unidentified_Acidobacteria-5	s__unidentified_Acidobacteria-5	4467262
OTU6656	24	6	4	0	0	0	0	0	0	0	0	5	18	39	30	32	0	0	19	18	13	0	0	60	0	0	0	0	0	0	0	0	0	0	0	0	k__Bacteria	p__Acidobacteria	c__Acidobacteria-5	o__unidentified_Acidobacteria-5	f__unidentified_Acidobacteria-5	g__unidentified_Acidobacteria-5	s__unidentified_Acidobacteria-5	243181
OTU4675	15	25	29	15	1	0	1	4	1	0	2	11	10	17	22	3	0	0	27	21	22	3	0	15	0	0	0	0	0	0	0	0	0	0	0	0	k__Bacteria	p__Acidobacteria	c__Acidobacteria-5	o__unidentified_Acidobacteria-5	f__unidentified_Acidobacteria-5	g__unidentified_Acidobacteria-5	s__unidentified_Acidobacteria-5	646030
OTU5346	2	2	5	11	5	4	3	13	9	5	11	6	12	1	1	0	12	1	15	23	56	17	14	0	0	0	0	0	0	0	0	0	1	0	1	3	k__Bacteria	p__Acidobacteria	c__Acidobacteria-5	o__unidentified_Acidobacteria-5	f__unidentified_Acidobacteria-5	g__unidentified_Acidobacteria-5	s__unidentified_Acidobacteria-5	250533
OTU3481	13	18	7	6	0	0	1	2	4	3	2	5	11	15	19	2	2	2	11	27	20	6	4	0	0	0	0	0	0	0	0	0	0	0	1	0	k__Bacteria	p__Acidobacteria	c__Acidobacteria-5	o__unidentified_Acidobacteria-5	f__unidentified_Acidobacteria-5	g__unidentified_Acidobacteria-5	s__unidentified_Acidobacteria-5	255838
OTU5923	5	2	11	12	0	0	1	7	1	2	1	2	15	2	7	0	5	1	33	20	18	5	0	1	0	3	1	1	0	0	1	1	1	0	0	0	k__Bacteria	p__Acidobacteria	c__Acidobacteria-5	o__unidentified_Acidobacteria-5	f__unidentified_Acidobacteria-5	g__unidentified_Acidobacteria-5	s__unidentified_Acidobacteria-5	755077
OTU9790	8	8	3	1	0	0	1	1	0	0	0	3	10	6	13	8	12	0	20	14	10	1	2	16	0	0	0	0	0	0	0	0	0	0	0	0	k__Bacteria	p__Acidobacteria	c__Acidobacteria-5	o__unidentified_Acidobacteria-5	f__unidentified_Acidobacteria-5	g__unidentified_Acidobacteria-5	s__unidentified_Acidobacteria-5	138920
OTU3226	10	3	11	1	0	0	0	1	0	0	0	0	4	9	11	4	0	0	8	13	1	0	0	6	0	0	0	0	0	0	0	0	0	0	0	0	k__Bacteria	p__Acidobacteria	c__Acidobacteria-5	o__unidentified_Acidobacteria-5	f__unidentified_Acidobacteria-5	g__unidentified_Acidobacteria-5	s__unidentified_Acidobacteria-5	136613
OTU1966	0	1	3	7	32	0	0	0	0	0	0	0	3	0	3	1	1	2	3	6	1	1	1	1	0	0	0	0	0	0	0	0	1	5	2	2	k__Bacteria	p__Acidobacteria	c__Acidobacteria-5	o__unidentified_Acidobacteria-5	f__unidentified_Acidobacteria-5	g__unidentified_Acidobacteria-5	s__unidentified_Acidobacteria-5	4346541
OTU6298	3	3	3	4	0	0	2	2	1	0	0	0	3	3	6	6	4	0	2	5	1	0	0	3	0	0	0	0	0	0	0	0	0	0	0	0	k__Bacteria	p__Acidobacteria	c__Acidobacteria-5	o__unidentified_Acidobacteria-5	f__unidentified_Acidobacteria-5	g__unidentified_Acidobacteria-5	s__unidentified_Acidobacteria-5	4402103
OTU43877	0	0	0	0	0	0	0	0	0	0	0	0	0	0	0	0	0	0	0	0	0	0	0	0	2	6	10	3	4	8	6	7	0	0	0	0	k__Bacteria	p__Acidobacteria	c__Acidobacteria-5	o__unidentified_Acidobacteria-5	f__unidentified_Acidobacteria-5	g__unidentified_Acidobacteria-5	s__unidentified_Acidobacteria-5	New.CleanUp.ReferenceOTU198502
OTU1624	6	6	4	1	1	0	0	0	0	0	0	2	4	6	4	0	0	0	0	1	0	0	0	5	0	0	0	0	0	0	0	0	0	0	0	0	k__Bacteria	p__Acidobacteria	c__Acidobacteria-5	o__unidentified_Acidobacteria-5	f__unidentified_Acidobacteria-5	g__unidentified_Acidobacteria-5	s__unidentified_Acidobacteria-5	1777154
OTU11355	0	0	0	0	1	0	0	1	2	0	1	0	0	0	0	3	14	1	0	0	0	0	1	0	0	0	0	0	0	0	0	0	6	0	2	0	k__Bacteria	p__Acidobacteria	c__Acidobacteria-5	o__unidentified_Acidobacteria-5	f__unidentified_Acidobacteria-5	g__unidentified_Acidobacteria-5	s__unidentified_Acidobacteria-5	2969906
OTU4046	0	0	0	2	2	3	1	0	0	0	3	0	1	0	0	0	7	2	0	0	0	0	0	0	0	0	0	0	0	0	0	0	0	2	2	4	k__Bacteria	p__Acidobacteria	c__Acidobacteria-5	o__unidentified_Acidobacteria-5	f__unidentified_Acidobacteria-5	g__unidentified_Acidobacteria-5	s__unidentified_Acidobacteria-5	1136154
OTU9707	1	1	6	3	1	0	1	1	0	0	0	0	3	0	1	0	0	1	3	2	1	2	0	0	0	0	0	0	0	0	0	0	0	0	0	0	k__Bacteria	p__Acidobacteria	c__Acidobacteria-5	o__unidentified_Acidobacteria-5	f__unidentified_Acidobacteria-5	g__unidentified_Acidobacteria-5	s__unidentified_Acidobacteria-5	4339223
OTU4548	4	0	0	1	1	0	1	0	2	0	0	1	1	0	3	1	0	0	2	2	3	0	0	4	0	0	0	0	0	0	0	0	0	0	0	0	k__Bacteria	p__Acidobacteria	c__Acidobacteria-5	o__unidentified_Acidobacteria-5	f__unidentified_Acidobacteria-5	g__unidentified_Acidobacteria-5	s__unidentified_Acidobacteria-5	3490229
OTU14146	0	0	0	0	4	3	2	0	0	0	1	0	0	1	0	0	0	4	1	1	0	3	0	0	0	0	0	0	0	0	0	0	0	2	2	2	k__Bacteria	p__Acidobacteria	c__Acidobacteria-5	o__unidentified_Acidobacteria-5	f__unidentified_Acidobacteria-5	g__unidentified_Acidobacteria-5	s__unidentified_Acidobacteria-5	New.CleanUp.ReferenceOTU10622
OTU1954	0	1	0	0	1	0	0	0	1	0	0	2	1	2	3	5	0	0	0	0	0	0	0	3	0	0	0	0	0	0	0	0	0	0	0	0	k__Bacteria	p__Acidobacteria	c__Acidobacteria-5	o__unidentified_Acidobacteria-5	f__unidentified_Acidobacteria-5	g__unidentified_Acidobacteria-5	s__unidentified_Acidobacteria-5	4437187
OTU14914	0	0	0	0	0	0	0	0	0	0	0	0	0	0	0	0	0	0	0	0	0	0	0	0	2	1	3	5	3	0	4	1	0	0	0	0	k__Bacteria	p__Acidobacteria	c__Acidobacteria-5	o__unidentified_Acidobacteria-5	f__unidentified_Acidobacteria-5	g__unidentified_Acidobacteria-5	s__unidentified_Acidobacteria-5	New.CleanUp.ReferenceOTU15307
OTU19523	0	0	0	0	0	0	0	0	0	0	0	0	0	0	0	0	0	0	0	0	0	0	0	0	3	0	0	5	4	1	4	2	0	0	0	0	k__Bacteria	p__Acidobacteria	c__Acidobacteria-5	o__unidentified_Acidobacteria-5	f__unidentified_Acidobacteria-5	g__unidentified_Acidobacteria-5	s__unidentified_Acidobacteria-5	New.CleanUp.ReferenceOTU43255
OTU970	0	0	2	2	0	0	0	1	0	0	0	0	0	0	4	0	0	0	0	2	0	0	0	0	0	0	0	0	0	0	0	0	0	0	0	0	k__Bacteria	p__Acidobacteria	c__Acidobacteria-5	o__unidentified_Acidobacteria-5	f__unidentified_Acidobacteria-5	g__unidentified_Acidobacteria-5	s__unidentified_Acidobacteria-5	3384225
OTU5114	0	0	0	0	0	0	0	0	2	0	0	0	0	0	0	5	0	0	0	0	0	0	0	3	0	0	0	0	0	0	0	0	0	0	0	0	k__Bacteria	p__Acidobacteria	c__Acidobacteria-5	o__unidentified_Acidobacteria-5	f__unidentified_Acidobacteria-5	g__unidentified_Acidobacteria-5	s__unidentified_Acidobacteria-5	4329542
OTU3261	0	0	1	0	0	0	0	0	1	0	0	1	0	0	0	0	2	0	2	0	1	0	0	0	0	0	0	0	0	0	0	0	0	1	0	0	k__Bacteria	p__Acidobacteria	c__Acidobacteria-5	o__unidentified_Acidobacteria-5	f__unidentified_Acidobacteria-5	g__unidentified_Acidobacteria-5	s__unidentified_Acidobacteria-5	656169
OTU6430	0	0	0	0	0	0	0	1	0	0	0	0	0	0	0	0	2	0	1	1	2	1	1	0	0	0	0	0	0	0	0	0	0	0	0	0	k__Bacteria	p__Acidobacteria	c__Acidobacteria-5	o__unidentified_Acidobacteria-5	f__unidentified_Acidobacteria-5	g__unidentified_Acidobacteria-5	s__unidentified_Acidobacteria-5	694507
OTU29774	0	0	0	0	0	0	0	0	0	0	2	0	3	0	0	0	0	0	0	0	0	0	0	0	0	0	0	0	0	0	0	0	2	2	0	0	k__Bacteria	p__Acidobacteria	c__Acidobacteria-5	o__unidentified_Acidobacteria-5	f__unidentified_Acidobacteria-5	g__unidentified_Acidobacteria-5	s__unidentified_Acidobacteria-5	New.CleanUp.ReferenceOTU109116
OTU50380	1	1	0	0	0	0	0	0	0	0	0	0	0	3	0	2	0	0	0	0	0	0	0	1	0	0	0	0	0	0	0	0	0	0	0	0	k__Bacteria	p__Acidobacteria	c__Acidobacteria-5	o__unidentified_Acidobacteria-5	f__unidentified_Acidobacteria-5	g__unidentified_Acidobacteria-5	s__unidentified_Acidobacteria-5	New.CleanUp.ReferenceOTU238850
OTU52452	0	0	0	0	1	0	0	1	0	0	0	0	0	0	0	0	1	0	0	3	0	0	0	0	0	0	0	0	0	0	0	0	0	0	0	0	k__Bacteria	p__Acidobacteria	c__Acidobacteria-5	o__unidentified_Acidobacteria-5	f__unidentified_Acidobacteria-5	g__unidentified_Acidobacteria-5	s__unidentified_Acidobacteria-5	New.CleanUp.ReferenceOTU251462
OTU54678	0	0	0	0	0	0	0	0	0	1	0	0	2	0	0	0	1	1	1	0	0	0	0	0	0	0	0	0	0	0	0	0	0	0	0	0	k__Bacteria	p__Acidobacteria	c__Acidobacteria-5	o__unidentified_Acidobacteria-5	f__unidentified_Acidobacteria-5	g__unidentified_Acidobacteria-5	s__unidentified_Acidobacteria-5	New.CleanUp.ReferenceOTU265591
OTU67737	0	0	0	0	0	0	0	0	0	0	0	0	0	1	1	0	0	0	0	2	0	0	0	2	0	0	0	0	0	0	0	0	0	0	0	0	k__Bacteria	p__Acidobacteria	c__Acidobacteria-5	o__unidentified_Acidobacteria-5	f__unidentified_Acidobacteria-5	g__unidentified_Acidobacteria-5	s__unidentified_Acidobacteria-5	New.CleanUp.ReferenceOTU348987
OTU65769	0	0	0	0	0	0	0	0	0	0	1	1	1	0	0	0	0	0	0	0	0	1	1	0	0	0	0	0	0	0	0	0	0	0	0	0	k__Bacteria	p__Acidobacteria	c__Acidobacteria-5	o__unidentified_Acidobacteria-5	f__unidentified_Acidobacteria-5	g__unidentified_Acidobacteria-5	s__unidentified_Acidobacteria-5	New.CleanUp.ReferenceOTU335903
OTU2898	0	0	0	0	0	0	0	0	0	0	0	0	0	0	0	4	0	0	0	0	0	0	0	0	0	0	0	0	0	0	0	0	0	0	0	0	k__Bacteria	p__Acidobacteria	c__Acidobacteria-5	o__unidentified_Acidobacteria-5	f__unidentified_Acidobacteria-5	g__unidentified_Acidobacteria-5	s__unidentified_Acidobacteria-5	2044253
OTU44399	1	0	0	0	0	0	0	1	0	0	0	0	0	0	1	0	0	0	0	0	0	1	0	0	0	0	0	0	0	0	0	0	0	0	0	0	k__Bacteria	p__Acidobacteria	c__Acidobacteria-5	o__unidentified_Acidobacteria-5	f__unidentified_Acidobacteria-5	g__unidentified_Acidobacteria-5	s__unidentified_Acidobacteria-5	New.CleanUp.ReferenceOTU201627
OTU6664	0	0	0	1	0	0	0	2	0	0	0	0	0	0	0	0	0	0	0	0	0	0	0	0	0	0	0	0	0	0	0	0	0	0	0	0	k__Bacteria	p__Acidobacteria	c__Acidobacteria-5	o__unidentified_Acidobacteria-5	f__unidentified_Acidobacteria-5	g__unidentified_Acidobacteria-5	s__unidentified_Acidobacteria-5	694262
OTU15895	0	0	0	0	0	0	0	0	0	0	0	0	0	0	0	0	0	0	0	0	1	2	0	0	0	0	0	0	0	0	0	0	0	0	0	0	k__Bacteria	p__Acidobacteria	c__Acidobacteria-5	o__unidentified_Acidobacteria-5	f__unidentified_Acidobacteria-5	g__unidentified_Acidobacteria-5	s__unidentified_Acidobacteria-5	New.CleanUp.ReferenceOTU21210
OTU17240	0	0	0	0	1	0	0	0	0	0	0	0	0	0	0	0	0	1	0	0	0	1	0	0	0	0	0	0	0	0	0	0	0	0	0	0	k__Bacteria	p__Acidobacteria	c__Acidobacteria-5	o__unidentified_Acidobacteria-5	f__unidentified_Acidobacteria-5	g__unidentified_Acidobacteria-5	s__unidentified_Acidobacteria-5	New.CleanUp.ReferenceOTU29376
OTU17490	0	0	0	0	0	0	0	0	0	0	0	0	0	0	0	0	0	2	0	0	0	0	0	1	0	0	0	0	0	0	0	0	0	0	0	0	k__Bacteria	p__Acidobacteria	c__Acidobacteria-5	o__unidentified_Acidobacteria-5	f__unidentified_Acidobacteria-5	g__unidentified_Acidobacteria-5	s__unidentified_Acidobacteria-5	New.CleanUp.ReferenceOTU30806
OTU19783	0	1	1	0	0	0	0	1	0	0	0	0	0	0	0	0	0	0	0	0	0	0	0	0	0	0	0	0	0	0	0	0	0	0	0	0	k__Bacteria	p__Acidobacteria	c__Acidobacteria-5	o__unidentified_Acidobacteria-5	f__unidentified_Acidobacteria-5	g__unidentified_Acidobacteria-5	s__unidentified_Acidobacteria-5	New.CleanUp.ReferenceOTU45043
OTU29515	0	0	0	0	1	0	0	0	1	0	0	0	0	0	0	0	0	0	0	0	1	0	0	0	0	0	0	0	0	0	0	0	0	0	0	0	k__Bacteria	p__Acidobacteria	c__Acidobacteria-5	o__unidentified_Acidobacteria-5	f__unidentified_Acidobacteria-5	g__unidentified_Acidobacteria-5	s__unidentified_Acidobacteria-5	New.CleanUp.ReferenceOTU107472
OTU41319	1	0	0	0	0	0	0	0	0	0	0	0	0	0	0	0	0	0	0	0	2	0	0	0	0	0	0	0	0	0	0	0	0	0	0	0	k__Bacteria	p__Acidobacteria	c__Acidobacteria-5	o__unidentified_Acidobacteria-5	f__unidentified_Acidobacteria-5	g__unidentified_Acidobacteria-5	s__unidentified_Acidobacteria-5	New.CleanUp.ReferenceOTU183453
OTU55918	0	0	1	0	0	0	1	0	0	0	0	0	0	0	0	0	0	0	1	0	0	0	0	0	0	0	0	0	0	0	0	0	0	0	0	0	k__Bacteria	p__Acidobacteria	c__Acidobacteria-5	o__unidentified_Acidobacteria-5	f__unidentified_Acidobacteria-5	g__unidentified_Acidobacteria-5	s__unidentified_Acidobacteria-5	New.CleanUp.ReferenceOTU273322
OTU22281	0	0	0	1	0	0	0	1	0	0	0	0	0	0	0	0	0	0	0	0	0	0	0	0	0	0	0	0	0	0	0	0	0	0	0	0	k__Bacteria	p__Acidobacteria	c__Acidobacteria-5	o__unidentified_Acidobacteria-5	f__unidentified_Acidobacteria-5	g__unidentified_Acidobacteria-5	s__unidentified_Acidobacteria-5	New.CleanUp.ReferenceOTU60441
OTU27263	1	0	0	0	0	0	0	0	0	0	0	0	0	0	1	0	0	0	0	0	0	0	0	0	0	0	0	0	0	0	0	0	0	0	0	0	k__Bacteria	p__Acidobacteria	c__Acidobacteria-5	o__unidentified_Acidobacteria-5	f__unidentified_Acidobacteria-5	g__unidentified_Acidobacteria-5	s__unidentified_Acidobacteria-5	New.CleanUp.ReferenceOTU92537
OTU27934	0	0	0	0	0	0	0	0	0	0	0	1	0	0	0	0	0	0	0	0	0	1	0	0	0	0	0	0	0	0	0	0	0	0	0	0	k__Bacteria	p__Acidobacteria	c__Acidobacteria-5	o__unidentified_Acidobacteria-5	f__unidentified_Acidobacteria-5	g__unidentified_Acidobacteria-5	s__unidentified_Acidobacteria-5	New.CleanUp.ReferenceOTU97018
OTU42848	0	0	0	0	0	0	0	0	0	0	0	0	0	0	0	0	0	0	0	2	0	0	0	0	0	0	0	0	0	0	0	0	0	0	0	0	k__Bacteria	p__Acidobacteria	c__Acidobacteria-5	o__unidentified_Acidobacteria-5	f__unidentified_Acidobacteria-5	g__unidentified_Acidobacteria-5	s__unidentified_Acidobacteria-5	New.CleanUp.ReferenceOTU192726
OTU43028	0	1	0	0	0	0	0	0	0	0	0	0	0	1	0	0	0	0	0	0	0	0	0	0	0	0	0	0	0	0	0	0	0	0	0	0	k__Bacteria	p__Acidobacteria	c__Acidobacteria-5	o__unidentified_Acidobacteria-5	f__unidentified_Acidobacteria-5	g__unidentified_Acidobacteria-5	s__unidentified_Acidobacteria-5	New.CleanUp.ReferenceOTU193745
OTU46204	0	0	0	2	0	0	0	0	0	0	0	0	0	0	0	0	0	0	0	0	0	0	0	0	0	0	0	0	0	0	0	0	0	0	0	0	k__Bacteria	p__Acidobacteria	c__Acidobacteria-5	o__unidentified_Acidobacteria-5	f__unidentified_Acidobacteria-5	g__unidentified_Acidobacteria-5	s__unidentified_Acidobacteria-5	New.CleanUp.ReferenceOTU213019
OTU47005	0	0	0	0	0	0	0	0	0	0	0	0	0	0	0	0	0	0	1	1	0	0	0	0	0	0	0	0	0	0	0	0	0	0	0	0	k__Bacteria	p__Acidobacteria	c__Acidobacteria-5	o__unidentified_Acidobacteria-5	f__unidentified_Acidobacteria-5	g__unidentified_Acidobacteria-5	s__unidentified_Acidobacteria-5	New.CleanUp.ReferenceOTU217913
OTU47057	0	0	0	0	0	0	0	0	0	0	0	0	0	0	0	0	1	0	1	0	0	0	0	0	0	0	0	0	0	0	0	0	0	0	0	0	k__Bacteria	p__Acidobacteria	c__Acidobacteria-5	o__unidentified_Acidobacteria-5	f__unidentified_Acidobacteria-5	g__unidentified_Acidobacteria-5	s__unidentified_Acidobacteria-5	New.CleanUp.ReferenceOTU218221
OTU53516	0	0	0	0	0	0	0	0	0	0	0	0	0	0	0	0	0	1	0	0	1	0	0	0	0	0	0	0	0	0	0	0	0	0	0	0	k__Bacteria	p__Acidobacteria	c__Acidobacteria-5	o__unidentified_Acidobacteria-5	f__unidentified_Acidobacteria-5	g__unidentified_Acidobacteria-5	s__unidentified_Acidobacteria-5	New.CleanUp.ReferenceOTU257893
OTU55162	0	0	0	0	0	0	0	0	0	0	0	0	0	0	0	0	0	0	0	1	0	0	1	0	0	0	0	0	0	0	0	0	0	0	0	0	k__Bacteria	p__Acidobacteria	c__Acidobacteria-5	o__unidentified_Acidobacteria-5	f__unidentified_Acidobacteria-5	g__unidentified_Acidobacteria-5	s__unidentified_Acidobacteria-5	New.CleanUp.ReferenceOTU268673
OTU57877	0	0	0	0	0	0	0	0	1	0	0	0	0	0	0	0	0	0	0	0	1	0	0	0	0	0	0	0	0	0	0	0	0	0	0	0	k__Bacteria	p__Acidobacteria	c__Acidobacteria-5	o__unidentified_Acidobacteria-5	f__unidentified_Acidobacteria-5	g__unidentified_Acidobacteria-5	s__unidentified_Acidobacteria-5	New.CleanUp.ReferenceOTU285501
OTU65883	1	0	1	0	0	0	0	0	0	0	0	0	0	0	0	0	0	0	0	0	0	0	0	0	0	0	0	0	0	0	0	0	0	0	0	0	k__Bacteria	p__Acidobacteria	c__Acidobacteria-5	o__unidentified_Acidobacteria-5	f__unidentified_Acidobacteria-5	g__unidentified_Acidobacteria-5	s__unidentified_Acidobacteria-5	New.CleanUp.ReferenceOTU336661
OTU709	0	0	0	0	1	0	0	0	0	0	0	0	0	0	0	0	0	0	0	0	0	0	0	0	0	0	0	0	0	0	0	0	0	0	0	0	k__Bacteria	p__Acidobacteria	c__Acidobacteria-5	o__unidentified_Acidobacteria-5	f__unidentified_Acidobacteria-5	g__unidentified_Acidobacteria-5	s__unidentified_Acidobacteria-5	4365894
OTU4758	0	0	0	0	0	0	0	0	0	0	0	0	0	0	0	0	0	0	0	0	0	0	0	1	0	0	0	0	0	0	0	0	0	0	0	0	k__Bacteria	p__Acidobacteria	c__Acidobacteria-5	o__unidentified_Acidobacteria-5	f__unidentified_Acidobacteria-5	g__unidentified_Acidobacteria-5	s__unidentified_Acidobacteria-5	513426
OTU11549	1	0	0	0	0	0	0	0	0	0	0	0	0	0	0	0	0	0	0	0	0	0	0	0	0	0	0	0	0	0	0	0	0	0	0	0	k__Bacteria	p__Acidobacteria	c__Acidobacteria-5	o__unidentified_Acidobacteria-5	f__unidentified_Acidobacteria-5	g__unidentified_Acidobacteria-5	s__unidentified_Acidobacteria-5	New.ReferenceOTU1022
OTU13114	0	0	0	0	0	1	0	0	0	0	0	0	0	0	0	0	0	0	0	0	0	0	0	0	0	0	0	0	0	0	0	0	0	0	0	0	k__Bacteria	p__Acidobacteria	c__Acidobacteria-5	o__unidentified_Acidobacteria-5	f__unidentified_Acidobacteria-5	g__unidentified_Acidobacteria-5	s__unidentified_Acidobacteria-5	New.CleanUp.ReferenceOTU4239
OTU15737	0	0	0	0	0	0	0	0	0	0	0	0	0	1	0	0	0	0	0	0	0	0	0	0	0	0	0	0	0	0	0	0	0	0	0	0	k__Bacteria	p__Acidobacteria	c__Acidobacteria-5	o__unidentified_Acidobacteria-5	f__unidentified_Acidobacteria-5	g__unidentified_Acidobacteria-5	s__unidentified_Acidobacteria-5	New.CleanUp.ReferenceOTU20368
OTU20531	1	0	0	0	0	0	0	0	0	0	0	0	0	0	0	0	0	0	0	0	0	0	0	0	0	0	0	0	0	0	0	0	0	0	0	0	k__Bacteria	p__Acidobacteria	c__Acidobacteria-5	o__unidentified_Acidobacteria-5	f__unidentified_Acidobacteria-5	g__unidentified_Acidobacteria-5	s__unidentified_Acidobacteria-5	New.CleanUp.ReferenceOTU49619
OTU20821	0	1	0	0	0	0	0	0	0	0	0	0	0	0	0	0	0	0	0	0	0	0	0	0	0	0	0	0	0	0	0	0	0	0	0	0	k__Bacteria	p__Acidobacteria	c__Acidobacteria-5	o__unidentified_Acidobacteria-5	f__unidentified_Acidobacteria-5	g__unidentified_Acidobacteria-5	s__unidentified_Acidobacteria-5	New.CleanUp.ReferenceOTU51413
OTU21622	0	0	0	0	0	0	0	0	0	0	0	0	0	0	0	0	0	0	0	0	0	1	0	0	0	0	0	0	0	0	0	0	0	0	0	0	k__Bacteria	p__Acidobacteria	c__Acidobacteria-5	o__unidentified_Acidobacteria-5	f__unidentified_Acidobacteria-5	g__unidentified_Acidobacteria-5	s__unidentified_Acidobacteria-5	New.CleanUp.ReferenceOTU56250
OTU22293	1	0	0	0	0	0	0	0	0	0	0	0	0	0	0	0	0	0	0	0	0	0	0	0	0	0	0	0	0	0	0	0	0	0	0	0	k__Bacteria	p__Acidobacteria	c__Acidobacteria-5	o__unidentified_Acidobacteria-5	f__unidentified_Acidobacteria-5	g__unidentified_Acidobacteria-5	s__unidentified_Acidobacteria-5	New.CleanUp.ReferenceOTU60540
OTU24370	0	0	0	1	0	0	0	0	0	0	0	0	0	0	0	0	0	0	0	0	0	0	0	0	0	0	0	0	0	0	0	0	0	0	0	0	k__Bacteria	p__Acidobacteria	c__Acidobacteria-5	o__unidentified_Acidobacteria-5	f__unidentified_Acidobacteria-5	g__unidentified_Acidobacteria-5	s__unidentified_Acidobacteria-5	New.CleanUp.ReferenceOTU73712
OTU24849	0	0	0	0	0	0	0	0	0	0	0	0	0	0	0	0	0	0	0	0	0	0	0	0	0	0	0	0	0	0	0	0	0	0	1	0	k__Bacteria	p__Acidobacteria	c__Acidobacteria-5	o__unidentified_Acidobacteria-5	f__unidentified_Acidobacteria-5	g__unidentified_Acidobacteria-5	s__unidentified_Acidobacteria-5	New.CleanUp.ReferenceOTU76723
OTU25859	0	0	0	0	0	0	0	0	0	0	0	0	0	0	0	0	0	0	0	0	1	0	0	0	0	0	0	0	0	0	0	0	0	0	0	0	k__Bacteria	p__Acidobacteria	c__Acidobacteria-5	o__unidentified_Acidobacteria-5	f__unidentified_Acidobacteria-5	g__unidentified_Acidobacteria-5	s__unidentified_Acidobacteria-5	New.CleanUp.ReferenceOTU83428
OTU25921	0	0	0	0	0	0	0	0	0	0	0	0	0	0	0	0	0	0	1	0	0	0	0	0	0	0	0	0	0	0	0	0	0	0	0	0	k__Bacteria	p__Acidobacteria	c__Acidobacteria-5	o__unidentified_Acidobacteria-5	f__unidentified_Acidobacteria-5	g__unidentified_Acidobacteria-5	s__unidentified_Acidobacteria-5	New.CleanUp.ReferenceOTU83780
OTU27458	0	0	0	0	0	0	0	0	0	0	0	0	0	0	0	0	1	0	0	0	0	0	0	0	0	0	0	0	0	0	0	0	0	0	0	0	k__Bacteria	p__Acidobacteria	c__Acidobacteria-5	o__unidentified_Acidobacteria-5	f__unidentified_Acidobacteria-5	g__unidentified_Acidobacteria-5	s__unidentified_Acidobacteria-5	New.CleanUp.ReferenceOTU93909
OTU27526	1	0	0	0	0	0	0	0	0	0	0	0	0	0	0	0	0	0	0	0	0	0	0	0	0	0	0	0	0	0	0	0	0	0	0	0	k__Bacteria	p__Acidobacteria	c__Acidobacteria-5	o__unidentified_Acidobacteria-5	f__unidentified_Acidobacteria-5	g__unidentified_Acidobacteria-5	s__unidentified_Acidobacteria-5	New.CleanUp.ReferenceOTU94334
OTU30588	0	0	0	0	0	0	0	0	0	0	0	0	0	0	0	0	0	0	0	0	0	0	0	0	0	0	0	0	0	0	0	0	0	0	0	1	k__Bacteria	p__Acidobacteria	c__Acidobacteria-5	o__unidentified_Acidobacteria-5	f__unidentified_Acidobacteria-5	g__unidentified_Acidobacteria-5	s__unidentified_Acidobacteria-5	New.CleanUp.ReferenceOTU114293
OTU32466	1	0	0	0	0	0	0	0	0	0	0	0	0	0	0	0	0	0	0	0	0	0	0	0	0	0	0	0	0	0	0	0	0	0	0	0	k__Bacteria	p__Acidobacteria	c__Acidobacteria-5	o__unidentified_Acidobacteria-5	f__unidentified_Acidobacteria-5	g__unidentified_Acidobacteria-5	s__unidentified_Acidobacteria-5	New.CleanUp.ReferenceOTU126484
OTU34518	0	0	0	0	0	0	0	0	0	0	0	0	0	0	1	0	0	0	0	0	0	0	0	0	0	0	0	0	0	0	0	0	0	0	0	0	k__Bacteria	p__Acidobacteria	c__Acidobacteria-5	o__unidentified_Acidobacteria-5	f__unidentified_Acidobacteria-5	g__unidentified_Acidobacteria-5	s__unidentified_Acidobacteria-5	New.CleanUp.ReferenceOTU140159
OTU35655	0	0	0	0	0	0	0	0	0	0	0	0	0	0	0	0	0	0	0	0	1	0	0	0	0	0	0	0	0	0	0	0	0	0	0	0	k__Bacteria	p__Acidobacteria	c__Acidobacteria-5	o__unidentified_Acidobacteria-5	f__unidentified_Acidobacteria-5	g__unidentified_Acidobacteria-5	s__unidentified_Acidobacteria-5	New.CleanUp.ReferenceOTU147459
OTU40612	0	0	0	0	0	0	0	0	0	0	0	0	0	0	1	0	0	0	0	0	0	0	0	0	0	0	0	0	0	0	0	0	0	0	0	0	k__Bacteria	p__Acidobacteria	c__Acidobacteria-5	o__unidentified_Acidobacteria-5	f__unidentified_Acidobacteria-5	g__unidentified_Acidobacteria-5	s__unidentified_Acidobacteria-5	New.CleanUp.ReferenceOTU179376
OTU41888	0	0	0	0	0	0	0	0	0	1	0	0	0	0	0	0	0	0	0	0	0	0	0	0	0	0	0	0	0	0	0	0	0	0	0	0	k__Bacteria	p__Acidobacteria	c__Acidobacteria-5	o__unidentified_Acidobacteria-5	f__unidentified_Acidobacteria-5	g__unidentified_Acidobacteria-5	s__unidentified_Acidobacteria-5	New.CleanUp.ReferenceOTU187042
OTU42445	0	1	0	0	0	0	0	0	0	0	0	0	0	0	0	0	0	0	0	0	0	0	0	0	0	0	0	0	0	0	0	0	0	0	0	0	k__Bacteria	p__Acidobacteria	c__Acidobacteria-5	o__unidentified_Acidobacteria-5	f__unidentified_Acidobacteria-5	g__unidentified_Acidobacteria-5	s__unidentified_Acidobacteria-5	New.CleanUp.ReferenceOTU190439
OTU43436	1	0	0	0	0	0	0	0	0	0	0	0	0	0	0	0	0	0	0	0	0	0	0	0	0	0	0	0	0	0	0	0	0	0	0	0	k__Bacteria	p__Acidobacteria	c__Acidobacteria-5	o__unidentified_Acidobacteria-5	f__unidentified_Acidobacteria-5	g__unidentified_Acidobacteria-5	s__unidentified_Acidobacteria-5	New.CleanUp.ReferenceOTU195968
OTU43869	0	0	0	0	0	0	0	0	0	0	0	0	0	0	0	0	1	0	0	0	0	0	0	0	0	0	0	0	0	0	0	0	0	0	0	0	k__Bacteria	p__Acidobacteria	c__Acidobacteria-5	o__unidentified_Acidobacteria-5	f__unidentified_Acidobacteria-5	g__unidentified_Acidobacteria-5	s__unidentified_Acidobacteria-5	New.CleanUp.ReferenceOTU198466
OTU44673	0	0	0	0	0	0	0	0	0	0	0	0	1	0	0	0	0	0	0	0	0	0	0	0	0	0	0	0	0	0	0	0	0	0	0	0	k__Bacteria	p__Acidobacteria	c__Acidobacteria-5	o__unidentified_Acidobacteria-5	f__unidentified_Acidobacteria-5	g__unidentified_Acidobacteria-5	s__unidentified_Acidobacteria-5	New.CleanUp.ReferenceOTU203460
OTU45507	1	0	0	0	0	0	0	0	0	0	0	0	0	0	0	0	0	0	0	0	0	0	0	0	0	0	0	0	0	0	0	0	0	0	0	0	k__Bacteria	p__Acidobacteria	c__Acidobacteria-5	o__unidentified_Acidobacteria-5	f__unidentified_Acidobacteria-5	g__unidentified_Acidobacteria-5	s__unidentified_Acidobacteria-5	New.CleanUp.ReferenceOTU208900
OTU46038	0	0	0	0	0	0	0	0	0	0	0	0	0	1	0	0	0	0	0	0	0	0	0	0	0	0	0	0	0	0	0	0	0	0	0	0	k__Bacteria	p__Acidobacteria	c__Acidobacteria-5	o__unidentified_Acidobacteria-5	f__unidentified_Acidobacteria-5	g__unidentified_Acidobacteria-5	s__unidentified_Acidobacteria-5	New.CleanUp.ReferenceOTU211918
OTU47148	0	0	0	0	0	0	0	0	0	0	0	0	0	0	0	0	0	0	1	0	0	0	0	0	0	0	0	0	0	0	0	0	0	0	0	0	k__Bacteria	p__Acidobacteria	c__Acidobacteria-5	o__unidentified_Acidobacteria-5	f__unidentified_Acidobacteria-5	g__unidentified_Acidobacteria-5	s__unidentified_Acidobacteria-5	New.CleanUp.ReferenceOTU218838
OTU48776	0	0	0	0	0	0	0	0	0	0	0	1	0	0	0	0	0	0	0	0	0	0	0	0	0	0	0	0	0	0	0	0	0	0	0	0	k__Bacteria	p__Acidobacteria	c__Acidobacteria-5	o__unidentified_Acidobacteria-5	f__unidentified_Acidobacteria-5	g__unidentified_Acidobacteria-5	s__unidentified_Acidobacteria-5	New.CleanUp.ReferenceOTU228795
OTU51673	0	0	0	0	0	0	0	0	0	0	0	0	0	0	0	0	0	0	0	0	0	0	0	0	0	0	1	0	0	0	0	0	0	0	0	0	k__Bacteria	p__Acidobacteria	c__Acidobacteria-5	o__unidentified_Acidobacteria-5	f__unidentified_Acidobacteria-5	g__unidentified_Acidobacteria-5	s__unidentified_Acidobacteria-5	New.CleanUp.ReferenceOTU246688
OTU54641	0	0	0	0	0	0	0	0	0	0	0	0	0	0	0	0	0	0	1	0	0	0	0	0	0	0	0	0	0	0	0	0	0	0	0	0	k__Bacteria	p__Acidobacteria	c__Acidobacteria-5	o__unidentified_Acidobacteria-5	f__unidentified_Acidobacteria-5	g__unidentified_Acidobacteria-5	s__unidentified_Acidobacteria-5	New.CleanUp.ReferenceOTU265324
OTU58558	0	1	0	0	0	0	0	0	0	0	0	0	0	0	0	0	0	0	0	0	0	0	0	0	0	0	0	0	0	0	0	0	0	0	0	0	k__Bacteria	p__Acidobacteria	c__Acidobacteria-5	o__unidentified_Acidobacteria-5	f__unidentified_Acidobacteria-5	g__unidentified_Acidobacteria-5	s__unidentified_Acidobacteria-5	New.CleanUp.ReferenceOTU289653
OTU59979	0	0	0	0	0	0	0	1	0	0	0	0	0	0	0	0	0	0	0	0	0	0	0	0	0	0	0	0	0	0	0	0	0	0	0	0	k__Bacteria	p__Acidobacteria	c__Acidobacteria-5	o__unidentified_Acidobacteria-5	f__unidentified_Acidobacteria-5	g__unidentified_Acidobacteria-5	s__unidentified_Acidobacteria-5	New.CleanUp.ReferenceOTU298700
OTU60419	0	0	0	0	0	0	0	0	0	0	0	0	0	0	0	0	0	0	0	1	0	0	0	0	0	0	0	0	0	0	0	0	0	0	0	0	k__Bacteria	p__Acidobacteria	c__Acidobacteria-5	o__unidentified_Acidobacteria-5	f__unidentified_Acidobacteria-5	g__unidentified_Acidobacteria-5	s__unidentified_Acidobacteria-5	New.CleanUp.ReferenceOTU301292
OTU60720	1	0	0	0	0	0	0	0	0	0	0	0	0	0	0	0	0	0	0	0	0	0	0	0	0	0	0	0	0	0	0	0	0	0	0	0	k__Bacteria	p__Acidobacteria	c__Acidobacteria-5	o__unidentified_Acidobacteria-5	f__unidentified_Acidobacteria-5	g__unidentified_Acidobacteria-5	s__unidentified_Acidobacteria-5	New.CleanUp.ReferenceOTU303268
OTU60777	0	0	0	0	0	0	0	0	0	0	0	0	0	0	0	0	0	1	0	0	0	0	0	0	0	0	0	0	0	0	0	0	0	0	0	0	k__Bacteria	p__Acidobacteria	c__Acidobacteria-5	o__unidentified_Acidobacteria-5	f__unidentified_Acidobacteria-5	g__unidentified_Acidobacteria-5	s__unidentified_Acidobacteria-5	New.CleanUp.ReferenceOTU303603
OTU61784	0	0	0	0	0	0	0	0	0	0	0	0	0	0	0	0	0	1	0	0	0	0	0	0	0	0	0	0	0	0	0	0	0	0	0	0	k__Bacteria	p__Acidobacteria	c__Acidobacteria-5	o__unidentified_Acidobacteria-5	f__unidentified_Acidobacteria-5	g__unidentified_Acidobacteria-5	s__unidentified_Acidobacteria-5	New.CleanUp.ReferenceOTU310154
OTU62280	0	0	0	0	0	0	0	0	0	0	0	0	0	0	0	0	0	0	0	0	0	0	0	1	0	0	0	0	0	0	0	0	0	0	0	0	k__Bacteria	p__Acidobacteria	c__Acidobacteria-5	o__unidentified_Acidobacteria-5	f__unidentified_Acidobacteria-5	g__unidentified_Acidobacteria-5	s__unidentified_Acidobacteria-5	New.CleanUp.ReferenceOTU313280
OTU62418	0	0	0	0	0	0	0	0	0	0	0	1	0	0	0	0	0	0	0	0	0	0	0	0	0	0	0	0	0	0	0	0	0	0	0	0	k__Bacteria	p__Acidobacteria	c__Acidobacteria-5	o__unidentified_Acidobacteria-5	f__unidentified_Acidobacteria-5	g__unidentified_Acidobacteria-5	s__unidentified_Acidobacteria-5	New.CleanUp.ReferenceOTU314208
OTU62647	0	0	0	0	0	0	0	0	0	0	0	0	0	0	0	1	0	0	0	0	0	0	0	0	0	0	0	0	0	0	0	0	0	0	0	0	k__Bacteria	p__Acidobacteria	c__Acidobacteria-5	o__unidentified_Acidobacteria-5	f__unidentified_Acidobacteria-5	g__unidentified_Acidobacteria-5	s__unidentified_Acidobacteria-5	New.CleanUp.ReferenceOTU315678
OTU64014	0	0	0	0	0	0	0	0	0	0	0	0	0	0	1	0	0	0	0	0	0	0	0	0	0	0	0	0	0	0	0	0	0	0	0	0	k__Bacteria	p__Acidobacteria	c__Acidobacteria-5	o__unidentified_Acidobacteria-5	f__unidentified_Acidobacteria-5	g__unidentified_Acidobacteria-5	s__unidentified_Acidobacteria-5	New.CleanUp.ReferenceOTU324310
OTU65074	0	0	0	0	0	0	0	0	0	0	0	0	1	0	0	0	0	0	0	0	0	0	0	0	0	0	0	0	0	0	0	0	0	0	0	0	k__Bacteria	p__Acidobacteria	c__Acidobacteria-5	o__unidentified_Acidobacteria-5	f__unidentified_Acidobacteria-5	g__unidentified_Acidobacteria-5	s__unidentified_Acidobacteria-5	New.CleanUp.ReferenceOTU331463
OTU67713	1	0	0	0	0	0	0	0	0	0	0	0	0	0	0	0	0	0	0	0	0	0	0	0	0	0	0	0	0	0	0	0	0	0	0	0	k__Bacteria	p__Acidobacteria	c__Acidobacteria-5	o__unidentified_Acidobacteria-5	f__unidentified_Acidobacteria-5	g__unidentified_Acidobacteria-5	s__unidentified_Acidobacteria-5	New.CleanUp.ReferenceOTU348803
OTU67854	0	0	0	0	0	0	0	0	0	0	0	0	0	0	0	0	0	1	0	0	0	0	0	0	0	0	0	0	0	0	0	0	0	0	0	0	k__Bacteria	p__Acidobacteria	c__Acidobacteria-5	o__unidentified_Acidobacteria-5	f__unidentified_Acidobacteria-5	g__unidentified_Acidobacteria-5	s__unidentified_Acidobacteria-5	New.CleanUp.ReferenceOTU349896
OTU10641	1	0	0	0	0	0	0	0	0	0	0	0	0	0	0	4	0	0	0	0	0	0	0	7	0	0	0	0	0	0	0	0	0	0	0	0	k__Bacteria	p__Acidobacteria	c__Acidobacteria-6	o__BPC015	f__unidentified_BPC015	g__unidentified_BPC015	s__unidentified_BPC015	4442955
OTU8448	55	38	39	16	0	0	0	1	11	1	3	51	44	38	57	12	3	0	76	66	9	5	0	18	0	0	0	0	0	0	0	0	0	0	0	0	k__Bacteria	p__Acidobacteria	c__Acidobacteria-6	o__CCU21	f__unidentified_CCU21	g__unidentified_CCU21	s__unidentified_CCU21	2068089
OTU9057	82	17	12	0	0	0	0	0	0	0	0	5	34	57	100	41	0	0	4	38	1	2	0	143	0	0	0	0	0	0	0	0	0	0	0	0	k__Bacteria	p__Acidobacteria	c__Acidobacteria-6	o__CCU21	f__unidentified_CCU21	g__unidentified_CCU21	s__unidentified_CCU21	2733662
OTU9027	11	10	38	2	0	0	2	2	1	1	11	7	19	22	18	4	20	2	33	14	20	12	1	3	0	0	0	0	0	0	0	0	0	0	1	0	k__Bacteria	p__Acidobacteria	c__Acidobacteria-6	o__CCU21	f__unidentified_CCU21	g__unidentified_CCU21	s__unidentified_CCU21	357743
OTU5861	20	5	4	2	1	0	0	0	0	0	0	8	5	17	16	24	0	0	0	5	7	0	0	56	0	0	0	0	0	0	0	0	0	0	0	0	k__Bacteria	p__Acidobacteria	c__Acidobacteria-6	o__CCU21	f__unidentified_CCU21	g__unidentified_CCU21	s__unidentified_CCU21	637937
OTU9620	0	0	0	0	0	0	0	0	0	0	0	0	0	1	1	1	0	0	0	0	22	14	5	121	0	0	0	0	0	0	0	0	0	0	0	0	k__Bacteria	p__Acidobacteria	c__Acidobacteria-6	o__CCU21	f__unidentified_CCU21	g__unidentified_CCU21	s__unidentified_CCU21	570191
OTU10946	16	3	4	1	0	0	0	0	0	0	0	16	16	28	13	5	0	0	10	12	1	0	0	20	0	0	0	0	0	0	0	0	0	0	0	0	k__Bacteria	p__Acidobacteria	c__Acidobacteria-6	o__CCU21	f__unidentified_CCU21	g__unidentified_CCU21	s__unidentified_CCU21	2969921
OTU8873	21	11	7	0	0	0	0	0	0	0	0	2	8	17	23	4	0	0	2	10	1	0	0	15	0	0	0	0	0	0	0	0	0	0	0	0	k__Bacteria	p__Acidobacteria	c__Acidobacteria-6	o__CCU21	f__unidentified_CCU21	g__unidentified_CCU21	s__unidentified_CCU21	819976
OTU8825	11	3	6	0	0	0	0	0	0	0	0	18	2	3	12	5	0	0	0	8	4	1	1	46	0	0	0	0	0	0	0	0	0	0	0	0	k__Bacteria	p__Acidobacteria	c__Acidobacteria-6	o__CCU21	f__unidentified_CCU21	g__unidentified_CCU21	s__unidentified_CCU21	4368136
OTU8049	9	4	11	1	0	0	1	0	0	0	0	4	7	8	10	5	9	0	35	8	1	0	0	2	0	0	0	0	0	0	0	0	0	0	0	0	k__Bacteria	p__Acidobacteria	c__Acidobacteria-6	o__CCU21	f__unidentified_CCU21	g__unidentified_CCU21	s__unidentified_CCU21	3793255
OTU31509	18	1	0	0	0	0	0	0	0	0	0	0	0	16	31	18	0	0	0	0	0	0	0	9	0	0	0	0	0	0	0	0	0	0	0	0	k__Bacteria	p__Acidobacteria	c__Acidobacteria-6	o__CCU21	f__unidentified_CCU21	g__unidentified_CCU21	s__unidentified_CCU21	New.CleanUp.ReferenceOTU120077
OTU5457	0	0	7	3	0	2	2	0	3	1	0	1	3	1	0	0	9	5	12	1	6	5	9	0	0	0	0	0	0	0	0	0	2	0	2	0	k__Bacteria	p__Acidobacteria	c__Acidobacteria-6	o__CCU21	f__unidentified_CCU21	g__unidentified_CCU21	s__unidentified_CCU21	1111121
OTU6012	8	4	5	5	0	0	0	0	3	0	4	7	0	0	7	2	3	0	0	9	7	0	0	10	0	0	0	0	0	0	0	0	0	0	0	0	k__Bacteria	p__Acidobacteria	c__Acidobacteria-6	o__CCU21	f__unidentified_CCU21	g__unidentified_CCU21	s__unidentified_CCU21	3627262
OTU10704	3	4	1	1	3	0	0	2	2	0	0	5	5	2	4	3	10	6	6	4	7	1	0	0	0	1	0	0	0	0	0	0	1	0	0	0	k__Bacteria	p__Acidobacteria	c__Acidobacteria-6	o__CCU21	f__unidentified_CCU21	g__unidentified_CCU21	s__unidentified_CCU21	4408363
OTU3575	7	0	1	0	0	0	0	0	1	0	0	0	0	5	17	15	0	0	0	0	0	0	0	24	0	0	0	0	0	0	0	0	0	0	0	0	k__Bacteria	p__Acidobacteria	c__Acidobacteria-6	o__CCU21	f__unidentified_CCU21	g__unidentified_CCU21	s__unidentified_CCU21	4389969
OTU8608	11	2	0	0	0	0	0	0	0	0	0	0	0	15	3	9	0	0	0	0	0	0	0	20	0	0	0	0	0	0	0	0	0	0	0	0	k__Bacteria	p__Acidobacteria	c__Acidobacteria-6	o__CCU21	f__unidentified_CCU21	g__unidentified_CCU21	s__unidentified_CCU21	783106
OTU11062	9	0	0	0	0	0	0	0	0	0	0	0	0	0	5	6	0	0	1	0	0	0	0	35	0	0	0	0	0	0	0	0	0	0	0	0	k__Bacteria	p__Acidobacteria	c__Acidobacteria-6	o__CCU21	f__unidentified_CCU21	g__unidentified_CCU21	s__unidentified_CCU21	4417091
OTU5154	2	0	0	0	0	0	0	0	0	0	0	0	0	0	4	5	0	0	0	0	0	0	0	42	0	0	0	0	0	0	0	0	0	0	0	0	k__Bacteria	p__Acidobacteria	c__Acidobacteria-6	o__CCU21	f__unidentified_CCU21	g__unidentified_CCU21	s__unidentified_CCU21	4201291
OTU6411	7	0	4	0	0	0	0	0	0	0	0	0	1	4	6	8	0	0	8	2	0	0	0	12	0	0	0	0	0	0	0	0	0	0	0	0	k__Bacteria	p__Acidobacteria	c__Acidobacteria-6	o__CCU21	f__unidentified_CCU21	g__unidentified_CCU21	s__unidentified_CCU21	583802
OTU8434	5	0	1	0	0	0	0	0	0	0	0	0	4	4	3	8	0	0	0	2	0	0	0	21	0	0	0	0	0	0	0	0	0	0	0	0	k__Bacteria	p__Acidobacteria	c__Acidobacteria-6	o__CCU21	f__unidentified_CCU21	g__unidentified_CCU21	s__unidentified_CCU21	812386
OTU18646	7	1	4	0	0	0	0	0	0	0	0	2	4	1	3	1	1	0	1	6	2	3	0	2	0	0	0	0	0	0	0	0	0	0	0	0	k__Bacteria	p__Acidobacteria	c__Acidobacteria-6	o__CCU21	f__unidentified_CCU21	g__unidentified_CCU21	s__unidentified_CCU21	New.CleanUp.ReferenceOTU37916
OTU3349	0	1	3	0	0	0	0	1	0	2	3	8	2	0	1	0	1	0	0	6	5	0	0	0	0	0	0	0	0	0	0	0	0	0	0	0	k__Bacteria	p__Acidobacteria	c__Acidobacteria-6	o__CCU21	f__unidentified_CCU21	g__unidentified_CCU21	s__unidentified_CCU21	142005
OTU7881	1	1	3	0	0	0	0	0	0	2	2	5	1	0	4	0	0	0	0	1	4	2	0	7	0	0	0	0	0	0	0	0	0	0	0	0	k__Bacteria	p__Acidobacteria	c__Acidobacteria-6	o__CCU21	f__unidentified_CCU21	g__unidentified_CCU21	s__unidentified_CCU21	4248323
OTU6160	0	0	0	0	2	0	0	2	0	1	3	0	3	0	0	0	0	0	0	0	10	3	2	0	0	0	0	0	0	0	0	0	0	0	0	0	k__Bacteria	p__Acidobacteria	c__Acidobacteria-6	o__CCU21	f__unidentified_CCU21	g__unidentified_CCU21	s__unidentified_CCU21	4440397
OTU47686	4	0	1	0	0	0	0	0	0	0	0	2	0	5	4	6	0	0	0	0	0	0	0	4	0	0	0	0	0	0	0	0	0	0	0	0	k__Bacteria	p__Acidobacteria	c__Acidobacteria-6	o__CCU21	f__unidentified_CCU21	g__unidentified_CCU21	s__unidentified_CCU21	New.CleanUp.ReferenceOTU222093
OTU8128	0	0	0	0	0	0	0	0	0	1	0	0	0	0	1	0	0	0	0	0	9	12	1	0	0	0	0	0	0	0	0	0	0	0	0	0	k__Bacteria	p__Acidobacteria	c__Acidobacteria-6	o__CCU21	f__unidentified_CCU21	g__unidentified_CCU21	s__unidentified_CCU21	4408821
OTU2155	1	1	1	1	1	0	0	0	0	0	0	0	2	1	1	5	0	0	0	0	0	0	0	8	0	0	0	0	0	0	0	0	0	0	0	0	k__Bacteria	p__Acidobacteria	c__Acidobacteria-6	o__CCU21	f__unidentified_CCU21	g__unidentified_CCU21	s__unidentified_CCU21	4384853
OTU2372	5	0	2	0	0	0	0	0	0	0	0	0	0	0	14	0	0	0	0	0	0	0	0	1	0	0	0	0	0	0	0	0	0	0	0	0	k__Bacteria	p__Acidobacteria	c__Acidobacteria-6	o__CCU21	f__unidentified_CCU21	g__unidentified_CCU21	s__unidentified_CCU21	2405593
OTU16545	5	2	2	0	0	0	0	0	0	0	0	10	0	0	0	0	0	0	0	1	0	0	0	0	0	0	0	0	0	0	0	0	0	0	0	0	k__Bacteria	p__Acidobacteria	c__Acidobacteria-6	o__CCU21	f__unidentified_CCU21	g__unidentified_CCU21	s__unidentified_CCU21	New.CleanUp.ReferenceOTU24970
OTU11783	1	3	2	0	0	0	0	0	0	0	0	1	2	2	0	0	0	3	3	1	0	0	0	0	0	1	0	0	0	0	0	0	0	0	0	0	k__Bacteria	p__Acidobacteria	c__Acidobacteria-6	o__CCU21	f__unidentified_CCU21	g__unidentified_CCU21	s__unidentified_CCU21	New.ReferenceOTU1148
OTU3874	1	0	0	0	0	0	0	0	0	0	0	0	0	0	0	7	0	0	0	0	0	0	0	10	0	0	0	0	0	0	0	0	0	0	0	0	k__Bacteria	p__Acidobacteria	c__Acidobacteria-6	o__CCU21	f__unidentified_CCU21	g__unidentified_CCU21	s__unidentified_CCU21	816174
OTU7034	2	0	0	0	0	0	0	0	3	0	0	0	0	2	3	1	0	0	1	1	3	1	0	1	0	0	0	0	0	0	0	0	0	0	0	0	k__Bacteria	p__Acidobacteria	c__Acidobacteria-6	o__CCU21	f__unidentified_CCU21	g__unidentified_CCU21	s__unidentified_CCU21	1127344
OTU1962	1	1	6	1	0	0	0	0	0	0	0	8	0	0	0	0	0	0	0	0	0	0	0	0	0	0	0	0	0	0	0	0	0	0	0	0	k__Bacteria	p__Acidobacteria	c__Acidobacteria-6	o__CCU21	f__unidentified_CCU21	g__unidentified_CCU21	s__unidentified_CCU21	4342843
OTU393	0	0	1	0	0	0	1	0	0	0	0	0	6	0	0	0	2	0	1	2	1	1	0	0	0	0	0	0	0	0	0	0	0	0	0	0	k__Bacteria	p__Acidobacteria	c__Acidobacteria-6	o__CCU21	f__unidentified_CCU21	g__unidentified_CCU21	s__unidentified_CCU21	3460762
OTU39886	0	0	0	0	0	0	0	0	0	0	0	0	0	0	1	0	0	0	0	0	0	0	0	14	0	0	0	0	0	0	0	0	0	0	0	0	k__Bacteria	p__Acidobacteria	c__Acidobacteria-6	o__CCU21	f__unidentified_CCU21	g__unidentified_CCU21	s__unidentified_CCU21	New.CleanUp.ReferenceOTU175370
OTU4479	11	0	0	0	0	0	0	0	0	0	0	0	0	0	0	0	0	0	0	0	0	0	0	1	0	0	0	0	0	0	0	0	0	0	0	0	k__Bacteria	p__Acidobacteria	c__Acidobacteria-6	o__CCU21	f__unidentified_CCU21	g__unidentified_CCU21	s__unidentified_CCU21	359433
OTU9590	2	0	4	0	0	0	0	0	0	0	0	0	0	0	2	1	0	0	0	0	0	0	0	3	0	0	0	0	0	0	0	0	0	0	0	0	k__Bacteria	p__Acidobacteria	c__Acidobacteria-6	o__CCU21	f__unidentified_CCU21	g__unidentified_CCU21	s__unidentified_CCU21	4330638
OTU11793	0	0	1	0	0	0	0	0	0	0	1	7	0	0	0	0	0	0	0	0	1	2	0	0	0	0	0	0	0	0	0	0	0	0	0	0	k__Bacteria	p__Acidobacteria	c__Acidobacteria-6	o__CCU21	f__unidentified_CCU21	g__unidentified_CCU21	s__unidentified_CCU21	New.ReferenceOTU949
OTU12002	0	0	2	0	0	0	0	0	0	0	0	0	1	0	4	0	0	0	3	2	0	0	0	0	0	0	0	0	0	0	0	0	0	0	0	0	k__Bacteria	p__Acidobacteria	c__Acidobacteria-6	o__CCU21	f__unidentified_CCU21	g__unidentified_CCU21	s__unidentified_CCU21	New.ReferenceOTU1099
OTU6310	1	0	1	0	0	0	0	0	0	0	0	0	0	0	1	5	0	0	0	0	0	0	0	2	0	0	0	0	0	0	0	0	0	0	0	0	k__Bacteria	p__Acidobacteria	c__Acidobacteria-6	o__CCU21	f__unidentified_CCU21	g__unidentified_CCU21	s__unidentified_CCU21	620071
OTU16117	1	1	1	0	0	0	0	0	0	0	0	3	0	0	1	1	0	0	0	0	0	0	0	1	0	0	0	0	0	0	0	0	0	0	0	0	k__Bacteria	p__Acidobacteria	c__Acidobacteria-6	o__CCU21	f__unidentified_CCU21	g__unidentified_CCU21	s__unidentified_CCU21	New.CleanUp.ReferenceOTU22370
OTU2093	0	0	0	0	1	0	0	0	0	0	0	0	1	0	0	0	1	0	0	2	1	0	0	2	0	0	0	0	0	0	0	0	0	0	0	0	k__Bacteria	p__Acidobacteria	c__Acidobacteria-6	o__CCU21	f__unidentified_CCU21	g__unidentified_CCU21	s__unidentified_CCU21	1134682
OTU6128	0	0	0	0	0	1	0	0	1	2	0	0	0	0	0	0	0	0	1	0	0	0	0	1	0	0	0	0	0	0	0	0	2	0	0	0	k__Bacteria	p__Acidobacteria	c__Acidobacteria-6	o__CCU21	f__unidentified_CCU21	g__unidentified_CCU21	s__unidentified_CCU21	699975
OTU50454	0	0	0	0	0	0	0	0	0	0	0	0	0	0	6	0	0	0	0	2	0	0	0	0	0	0	0	0	0	0	0	0	0	0	0	0	k__Bacteria	p__Acidobacteria	c__Acidobacteria-6	o__CCU21	f__unidentified_CCU21	g__unidentified_CCU21	s__unidentified_CCU21	New.CleanUp.ReferenceOTU239217
OTU8217	1	0	0	0	0	0	0	0	0	0	0	0	0	0	0	6	0	0	0	0	0	0	0	0	0	0	0	0	0	0	0	0	0	0	0	0	k__Bacteria	p__Acidobacteria	c__Acidobacteria-6	o__CCU21	f__unidentified_CCU21	g__unidentified_CCU21	s__unidentified_CCU21	808033
OTU11465	1	0	0	1	0	0	0	0	0	0	0	1	0	0	0	4	0	0	0	0	0	0	0	0	0	0	0	0	0	0	0	0	0	0	0	0	k__Bacteria	p__Acidobacteria	c__Acidobacteria-6	o__CCU21	f__unidentified_CCU21	g__unidentified_CCU21	s__unidentified_CCU21	4222085
OTU338	0	0	0	0	0	0	0	0	0	0	0	0	0	0	0	6	0	0	0	0	0	0	0	0	0	0	0	0	0	0	0	0	0	0	0	0	k__Bacteria	p__Acidobacteria	c__Acidobacteria-6	o__CCU21	f__unidentified_CCU21	g__unidentified_CCU21	s__unidentified_CCU21	3753076
OTU2381	0	0	0	0	0	0	0	2	2	1	0	1	0	0	0	0	0	0	0	0	0	0	0	0	0	0	0	0	0	0	0	0	0	0	0	0	k__Bacteria	p__Acidobacteria	c__Acidobacteria-6	o__CCU21	f__unidentified_CCU21	g__unidentified_CCU21	s__unidentified_CCU21	321058
OTU4117	0	0	0	0	0	0	0	0	0	0	0	0	0	0	1	0	0	0	3	0	0	0	0	2	0	0	0	0	0	0	0	0	0	0	0	0	k__Bacteria	p__Acidobacteria	c__Acidobacteria-6	o__CCU21	f__unidentified_CCU21	g__unidentified_CCU21	s__unidentified_CCU21	1112088
OTU5833	2	1	0	0	0	0	0	0	0	0	0	0	0	0	0	0	0	0	0	1	0	0	0	2	0	0	0	0	0	0	0	0	0	0	0	0	k__Bacteria	p__Acidobacteria	c__Acidobacteria-6	o__CCU21	f__unidentified_CCU21	g__unidentified_CCU21	s__unidentified_CCU21	539120
OTU2778	0	0	1	0	0	0	0	0	3	1	0	0	0	0	0	0	0	0	0	0	0	0	0	0	0	0	0	0	0	0	0	0	0	0	0	0	k__Bacteria	p__Acidobacteria	c__Acidobacteria-6	o__CCU21	f__unidentified_CCU21	g__unidentified_CCU21	s__unidentified_CCU21	4405718
OTU8906	0	0	0	0	0	0	0	0	0	0	0	0	0	0	0	0	0	0	0	0	0	0	0	5	0	0	0	0	0	0	0	0	0	0	0	0	k__Bacteria	p__Acidobacteria	c__Acidobacteria-6	o__CCU21	f__unidentified_CCU21	g__unidentified_CCU21	s__unidentified_CCU21	578362
OTU22129	0	0	0	0	0	0	0	0	0	0	0	0	0	0	0	5	0	0	0	0	0	0	0	0	0	0	0	0	0	0	0	0	0	0	0	0	k__Bacteria	p__Acidobacteria	c__Acidobacteria-6	o__CCU21	f__unidentified_CCU21	g__unidentified_CCU21	s__unidentified_CCU21	New.CleanUp.ReferenceOTU59464
OTU48752	0	1	1	0	0	0	0	0	0	0	0	0	0	0	0	2	1	0	0	0	0	0	0	0	0	0	0	0	0	0	0	0	0	0	0	0	k__Bacteria	p__Acidobacteria	c__Acidobacteria-6	o__CCU21	f__unidentified_CCU21	g__unidentified_CCU21	s__unidentified_CCU21	New.CleanUp.ReferenceOTU228668
OTU16230	0	0	0	0	0	0	0	0	0	0	0	0	0	2	2	0	0	0	0	0	0	0	0	0	0	0	0	0	0	0	0	0	0	0	0	0	k__Bacteria	p__Acidobacteria	c__Acidobacteria-6	o__CCU21	f__unidentified_CCU21	g__unidentified_CCU21	s__unidentified_CCU21	New.CleanUp.ReferenceOTU23038
OTU36175	0	0	0	0	0	0	0	0	0	0	0	0	0	0	0	3	0	0	0	0	0	0	0	1	0	0	0	0	0	0	0	0	0	0	0	0	k__Bacteria	p__Acidobacteria	c__Acidobacteria-6	o__CCU21	f__unidentified_CCU21	g__unidentified_CCU21	s__unidentified_CCU21	New.CleanUp.ReferenceOTU150936
OTU6257	0	0	0	0	0	0	0	0	0	0	0	0	0	0	0	0	0	0	1	0	2	0	0	0	0	0	0	0	0	0	0	0	0	0	0	0	k__Bacteria	p__Acidobacteria	c__Acidobacteria-6	o__CCU21	f__unidentified_CCU21	g__unidentified_CCU21	s__unidentified_CCU21	211684
OTU6587	0	0	0	0	0	0	0	0	0	0	0	0	0	0	0	0	0	0	3	0	0	0	0	0	0	0	0	0	0	0	0	0	0	0	0	0	k__Bacteria	p__Acidobacteria	c__Acidobacteria-6	o__CCU21	f__unidentified_CCU21	g__unidentified_CCU21	s__unidentified_CCU21	764463
OTU40678	0	0	0	0	0	0	0	0	0	0	0	0	0	0	0	0	0	0	0	0	0	0	0	3	0	0	0	0	0	0	0	0	0	0	0	0	k__Bacteria	p__Acidobacteria	c__Acidobacteria-6	o__CCU21	f__unidentified_CCU21	g__unidentified_CCU21	s__unidentified_CCU21	New.CleanUp.ReferenceOTU179733
OTU53979	1	0	0	0	0	0	0	0	0	0	0	0	1	0	1	0	0	0	0	0	0	0	0	0	0	0	0	0	0	0	0	0	0	0	0	0	k__Bacteria	p__Acidobacteria	c__Acidobacteria-6	o__CCU21	f__unidentified_CCU21	g__unidentified_CCU21	s__unidentified_CCU21	New.CleanUp.ReferenceOTU260903
OTU62290	0	0	0	0	0	0	0	0	0	0	0	0	0	0	0	0	0	0	0	0	0	0	0	3	0	0	0	0	0	0	0	0	0	0	0	0	k__Bacteria	p__Acidobacteria	c__Acidobacteria-6	o__CCU21	f__unidentified_CCU21	g__unidentified_CCU21	s__unidentified_CCU21	New.CleanUp.ReferenceOTU313317
OTU6229	0	0	0	0	0	0	0	0	0	0	0	0	0	0	1	0	0	0	0	0	0	0	0	1	0	0	0	0	0	0	0	0	0	0	0	0	k__Bacteria	p__Acidobacteria	c__Acidobacteria-6	o__CCU21	f__unidentified_CCU21	g__unidentified_CCU21	s__unidentified_CCU21	3500731
OTU8844	0	0	0	0	0	0	0	0	0	0	0	0	0	0	1	0	0	0	0	1	0	0	0	0	0	0	0	0	0	0	0	0	0	0	0	0	k__Bacteria	p__Acidobacteria	c__Acidobacteria-6	o__CCU21	f__unidentified_CCU21	g__unidentified_CCU21	s__unidentified_CCU21	4458188
OTU9650	1	0	0	0	0	0	0	0	0	0	0	0	0	0	0	1	0	0	0	0	0	0	0	0	0	0	0	0	0	0	0	0	0	0	0	0	k__Bacteria	p__Acidobacteria	c__Acidobacteria-6	o__CCU21	f__unidentified_CCU21	g__unidentified_CCU21	s__unidentified_CCU21	1511163
OTU13038	0	0	0	0	0	0	0	0	0	0	0	0	0	0	0	0	0	0	0	0	0	0	0	2	0	0	0	0	0	0	0	0	0	0	0	0	k__Bacteria	p__Acidobacteria	c__Acidobacteria-6	o__CCU21	f__unidentified_CCU21	g__unidentified_CCU21	s__unidentified_CCU21	New.CleanUp.ReferenceOTU3817
OTU16341	0	0	0	0	0	0	0	0	0	0	0	0	0	0	0	0	0	0	0	0	0	0	0	2	0	0	0	0	0	0	0	0	0	0	0	0	k__Bacteria	p__Acidobacteria	c__Acidobacteria-6	o__CCU21	f__unidentified_CCU21	g__unidentified_CCU21	s__unidentified_CCU21	New.CleanUp.ReferenceOTU23737
OTU33012	0	0	0	0	0	0	0	0	0	0	0	0	0	0	0	0	0	0	1	0	1	0	0	0	0	0	0	0	0	0	0	0	0	0	0	0	k__Bacteria	p__Acidobacteria	c__Acidobacteria-6	o__CCU21	f__unidentified_CCU21	g__unidentified_CCU21	s__unidentified_CCU21	New.CleanUp.ReferenceOTU129975
OTU41426	1	0	0	0	0	0	0	0	0	0	0	0	0	0	1	0	0	0	0	0	0	0	0	0	0	0	0	0	0	0	0	0	0	0	0	0	k__Bacteria	p__Acidobacteria	c__Acidobacteria-6	o__CCU21	f__unidentified_CCU21	g__unidentified_CCU21	s__unidentified_CCU21	New.CleanUp.ReferenceOTU184270
OTU54594	0	0	0	0	0	0	0	0	0	0	0	0	0	0	2	0	0	0	0	0	0	0	0	0	0	0	0	0	0	0	0	0	0	0	0	0	k__Bacteria	p__Acidobacteria	c__Acidobacteria-6	o__CCU21	f__unidentified_CCU21	g__unidentified_CCU21	s__unidentified_CCU21	New.CleanUp.ReferenceOTU264977
OTU55803	0	0	0	0	0	0	0	0	0	0	0	0	0	0	0	0	0	0	0	0	0	0	0	2	0	0	0	0	0	0	0	0	0	0	0	0	k__Bacteria	p__Acidobacteria	c__Acidobacteria-6	o__CCU21	f__unidentified_CCU21	g__unidentified_CCU21	s__unidentified_CCU21	New.CleanUp.ReferenceOTU272594
OTU59331	0	0	0	0	0	0	0	0	0	0	0	0	0	1	0	0	0	0	1	0	0	0	0	0	0	0	0	0	0	0	0	0	0	0	0	0	k__Bacteria	p__Acidobacteria	c__Acidobacteria-6	o__CCU21	f__unidentified_CCU21	g__unidentified_CCU21	s__unidentified_CCU21	New.CleanUp.ReferenceOTU294524
OTU31032	0	0	0	0	0	0	0	0	0	0	0	1	0	0	0	0	0	0	0	0	0	0	0	0	0	0	0	0	0	0	0	0	0	0	0	0	k__Bacteria	p__Acidobacteria	c__Acidobacteria-6	o__CCU21	f__unidentified_CCU21	g__unidentified_CCU21	s__unidentified_CCU21	New.CleanUp.ReferenceOTU116924
OTU39061	0	0	1	0	0	0	0	0	0	0	0	0	0	0	0	0	0	0	0	0	0	0	0	0	0	0	0	0	0	0	0	0	0	0	0	0	k__Bacteria	p__Acidobacteria	c__Acidobacteria-6	o__CCU21	f__unidentified_CCU21	g__unidentified_CCU21	s__unidentified_CCU21	New.CleanUp.ReferenceOTU170291
OTU42203	0	0	0	0	0	0	0	0	1	0	0	0	0	0	0	0	0	0	0	0	0	0	0	0	0	0	0	0	0	0	0	0	0	0	0	0	k__Bacteria	p__Acidobacteria	c__Acidobacteria-6	o__CCU21	f__unidentified_CCU21	g__unidentified_CCU21	s__unidentified_CCU21	New.CleanUp.ReferenceOTU188961
OTU42455	1	0	0	0	0	0	0	0	0	0	0	0	0	0	0	0	0	0	0	0	0	0	0	0	0	0	0	0	0	0	0	0	0	0	0	0	k__Bacteria	p__Acidobacteria	c__Acidobacteria-6	o__CCU21	f__unidentified_CCU21	g__unidentified_CCU21	s__unidentified_CCU21	New.CleanUp.ReferenceOTU190494
OTU50215	0	0	0	0	0	0	0	0	0	0	0	0	1	0	0	0	0	0	0	0	0	0	0	0	0	0	0	0	0	0	0	0	0	0	0	0	k__Bacteria	p__Acidobacteria	c__Acidobacteria-6	o__CCU21	f__unidentified_CCU21	g__unidentified_CCU21	s__unidentified_CCU21	New.CleanUp.ReferenceOTU237807
OTU51478	0	0	1	0	0	0	0	0	0	0	0	0	0	0	0	0	0	0	0	0	0	0	0	0	0	0	0	0	0	0	0	0	0	0	0	0	k__Bacteria	p__Acidobacteria	c__Acidobacteria-6	o__CCU21	f__unidentified_CCU21	g__unidentified_CCU21	s__unidentified_CCU21	New.CleanUp.ReferenceOTU245407
OTU57344	0	0	0	0	0	0	0	0	0	0	0	0	1	0	0	0	0	0	0	0	0	0	0	0	0	0	0	0	0	0	0	0	0	0	0	0	k__Bacteria	p__Acidobacteria	c__Acidobacteria-6	o__CCU21	f__unidentified_CCU21	g__unidentified_CCU21	s__unidentified_CCU21	New.CleanUp.ReferenceOTU282183
OTU64001	0	0	1	0	0	0	0	0	0	0	0	0	0	0	0	0	0	0	0	0	0	0	0	0	0	0	0	0	0	0	0	0	0	0	0	0	k__Bacteria	p__Acidobacteria	c__Acidobacteria-6	o__CCU21	f__unidentified_CCU21	g__unidentified_CCU21	s__unidentified_CCU21	New.CleanUp.ReferenceOTU324231
OTU2718	157	344	476	391	131	99	109	399	575	394	194	204	497	85	119	22	419	90	990	388	591	274	238	13	0	2	3	0	1	18	1	5	83	82	27	65	k__Bacteria	p__Acidobacteria	c__Acidobacteria-6	o__iii1-15	f__unidentified_iii1-15	g__unidentified_iii1-15	s__unidentified_iii1-15	1722698
OTU9996	165	258	204	166	36	2	42	165	82	151	16	305	326	106	228	15	65	2	465	419	515	143	108	134	0	0	2	0	0	0	0	2	6	1	0	0	k__Bacteria	p__Acidobacteria	c__Acidobacteria-6	o__iii1-15	f__unidentified_iii1-15	g__unidentified_iii1-15	s__unidentified_iii1-15	89699
OTU3323	32	49	230	94	181	94	134	181	149	77	88	165	217	22	47	13	392	165	326	177	185	138	119	9	3	21	15	1	0	3	8	11	187	162	71	102	k__Bacteria	p__Acidobacteria	c__Acidobacteria-6	o__iii1-15	f__unidentified_iii1-15	g__unidentified_iii1-15	s__unidentified_iii1-15	571709
OTU2478	135	138	174	44	20	3	21	62	40	11	12	93	179	177	131	47	72	5	379	246	248	87	27	116	0	4	2	0	1	0	0	1	10	3	1	4	k__Bacteria	p__Acidobacteria	c__Acidobacteria-6	o__iii1-15	f__unidentified_iii1-15	g__unidentified_iii1-15	s__unidentified_iii1-15	4024062
OTU113	55	66	113	37	30	29	50	64	80	43	39	55	156	41	67	9	173	13	315	191	130	81	110	1	0	0	0	0	0	0	0	0	90	127	8	24	k__Bacteria	p__Acidobacteria	c__Acidobacteria-6	o__iii1-15	f__unidentified_iii1-15	g__unidentified_iii1-15	s__unidentified_iii1-15	698417
OTU3595	7	32	40	26	12	13	29	93	89	78	63	100	127	12	7	1	187	45	155	97	126	136	237	0	0	0	0	0	0	0	1	0	83	39	24	50	k__Bacteria	p__Acidobacteria	c__Acidobacteria-6	o__iii1-15	f__unidentified_iii1-15	g__unidentified_iii1-15	s__unidentified_iii1-15	661235
OTU5817	101	56	104	58	43	0	25	102	58	22	2	28	134	85	116	20	65	6	279	161	166	35	34	26	0	0	0	0	0	0	0	0	1	0	0	0	k__Bacteria	p__Acidobacteria	c__Acidobacteria-6	o__iii1-15	f__unidentified_iii1-15	g__unidentified_iii1-15	s__unidentified_iii1-15	1785533
OTU9377	66	64	156	114	25	2	19	99	77	66	25	31	157	27	65	6	112	7	220	120	79	21	53	7	0	0	0	0	0	0	0	0	9	13	22	8	k__Bacteria	p__Acidobacteria	c__Acidobacteria-6	o__iii1-15	f__unidentified_iii1-15	g__unidentified_iii1-15	s__unidentified_iii1-15	2340297
OTU3097	299	150	20	4	0	0	3	0	2	0	0	60	63	286	212	166	0	0	35	49	0	0	0	318	0	0	0	0	0	0	0	0	0	0	0	0	k__Bacteria	p__Acidobacteria	c__Acidobacteria-6	o__iii1-15	f__unidentified_iii1-15	g__unidentified_iii1-15	s__unidentified_iii1-15	4024061
OTU10508	186	77	74	24	21	36	46	32	30	10	12	28	58	131	116	80	92	44	132	69	39	28	16	32	0	0	1	0	0	0	1	0	12	13	37	27	k__Bacteria	p__Acidobacteria	c__Acidobacteria-6	o__iii1-15	f__unidentified_iii1-15	g__unidentified_iii1-15	s__unidentified_iii1-15	4393662
OTU7791	133	81	65	12	0	0	20	9	2	4	5	113	48	114	98	105	6	2	68	62	52	2	0	291	0	1	0	1	0	0	0	0	0	0	2	0	k__Bacteria	p__Acidobacteria	c__Acidobacteria-6	o__iii1-15	f__unidentified_iii1-15	g__unidentified_iii1-15	s__unidentified_iii1-15	791504
OTU1184	59	63	80	34	15	14	22	50	31	23	33	90	90	52	31	2	60	14	150	102	85	37	42	0	1	2	0	0	0	3	1	3	7	6	11	7	k__Bacteria	p__Acidobacteria	c__Acidobacteria-6	o__iii1-15	f__unidentified_iii1-15	g__unidentified_iii1-15	s__unidentified_iii1-15	113271
OTU1416	57	40	58	26	24	2	14	74	40	23	21	69	90	20	72	4	48	5	123	112	103	53	33	34	0	0	0	0	0	0	0	0	10	5	1	6	k__Bacteria	p__Acidobacteria	c__Acidobacteria-6	o__iii1-15	f__unidentified_iii1-15	g__unidentified_iii1-15	s__unidentified_iii1-15	4374733
OTU1232	32	17	36	18	5	8	12	58	48	18	35	19	86	36	32	5	95	15	116	41	69	40	92	59	0	1	0	0	0	0	0	2	45	14	35	43	k__Bacteria	p__Acidobacteria	c__Acidobacteria-6	o__iii1-15	f__unidentified_iii1-15	g__unidentified_iii1-15	s__unidentified_iii1-15	4446106
OTU2016	100	31	55	17	0	0	0	21	3	2	0	65	87	93	109	24	0	0	83	193	116	18	3	81	0	0	0	0	0	0	0	0	0	0	0	1	k__Bacteria	p__Acidobacteria	c__Acidobacteria-6	o__iii1-15	f__unidentified_iii1-15	g__unidentified_iii1-15	s__unidentified_iii1-15	313245
OTU7438	17	41	48	32	22	16	33	45	35	24	10	56	95	28	28	3	87	33	149	79	89	46	24	4	1	0	2	0	0	0	0	1	2	3	13	8	k__Bacteria	p__Acidobacteria	c__Acidobacteria-6	o__iii1-15	f__unidentified_iii1-15	g__unidentified_iii1-15	s__unidentified_iii1-15	748070
OTU10166	25	28	38	17	14	15	20	44	52	31	35	72	70	11	22	2	96	20	101	49	79	33	55	13	1	4	0	0	0	0	0	0	32	28	6	20	k__Bacteria	p__Acidobacteria	c__Acidobacteria-6	o__iii1-15	f__unidentified_iii1-15	g__unidentified_iii1-15	s__unidentified_iii1-15	4425901
OTU9252	101	28	64	20	8	1	8	35	11	6	17	30	72	79	76	57	38	5	98	52	51	16	6	62	0	1	1	0	0	0	0	0	20	14	3	10	k__Bacteria	p__Acidobacteria	c__Acidobacteria-6	o__iii1-15	f__unidentified_iii1-15	g__unidentified_iii1-15	s__unidentified_iii1-15	4361133
OTU10254	91	48	60	7	3	6	10	7	14	14	9	50	35	53	144	8	56	14	138	79	43	4	8	24	0	0	0	0	0	0	0	1	1	7	3	6	k__Bacteria	p__Acidobacteria	c__Acidobacteria-6	o__iii1-15	f__unidentified_iii1-15	g__unidentified_iii1-15	s__unidentified_iii1-15	368890
OTU1555	0	2	85	59	11	32	9	121	47	12	6	3	86	0	55	4	54	19	43	116	37	17	14	0	0	0	0	0	0	0	0	0	11	8	1	19	k__Bacteria	p__Acidobacteria	c__Acidobacteria-6	o__iii1-15	f__unidentified_iii1-15	g__unidentified_iii1-15	s__unidentified_iii1-15	4451407
OTU1199	48	21	26	6	44	51	69	8	5	1	3	18	57	75	61	39	5	24	104	53	11	4	2	49	0	6	4	0	1	0	0	0	5	6	29	21	k__Bacteria	p__Acidobacteria	c__Acidobacteria-6	o__iii1-15	f__unidentified_iii1-15	g__unidentified_iii1-15	s__unidentified_iii1-15	211678
OTU9058	191	34	32	5	2	0	0	2	0	0	0	13	17	133	72	127	0	0	46	13	4	0	0	112	1	0	0	0	0	0	0	0	0	0	0	0	k__Bacteria	p__Acidobacteria	c__Acidobacteria-6	o__iii1-15	f__unidentified_iii1-15	g__unidentified_iii1-15	s__unidentified_iii1-15	2733663
OTU2975	33	48	46	14	1	0	13	59	36	23	3	16	77	14	9	10	88	4	136	54	49	25	26	4	0	0	0	0	0	0	0	0	1	1	1	0	k__Bacteria	p__Acidobacteria	c__Acidobacteria-6	o__iii1-15	f__unidentified_iii1-15	g__unidentified_iii1-15	s__unidentified_iii1-15	798646
OTU8343	90	79	23	7	0	0	0	7	2	0	1	12	61	136	86	7	0	0	95	47	59	18	2	54	0	0	0	0	0	0	0	0	0	0	0	0	k__Bacteria	p__Acidobacteria	c__Acidobacteria-6	o__iii1-15	f__unidentified_iii1-15	g__unidentified_iii1-15	s__unidentified_iii1-15	4442148
OTU9363	15	7	34	21	8	1	12	70	35	20	9	7	34	8	21	4	42	8	83	70	77	41	42	7	0	0	0	0	0	0	0	0	16	18	3	3	k__Bacteria	p__Acidobacteria	c__Acidobacteria-6	o__iii1-15	f__unidentified_iii1-15	g__unidentified_iii1-15	s__unidentified_iii1-15	823292
OTU275	50	21	1	0	0	0	0	0	1	0	0	0	11	33	41	182	0	0	2	3	0	0	0	357	0	0	0	0	0	0	0	0	0	0	0	0	k__Bacteria	p__Acidobacteria	c__Acidobacteria-6	o__iii1-15	f__unidentified_iii1-15	g__unidentified_iii1-15	s__unidentified_iii1-15	4419153
OTU3416	2	3	42	46	56	2	11	62	42	17	6	7	86	0	4	1	97	5	26	44	11	6	5	0	0	2	1	0	1	4	1	2	14	21	27	6	k__Bacteria	p__Acidobacteria	c__Acidobacteria-6	o__iii1-15	f__unidentified_iii1-15	g__unidentified_iii1-15	s__unidentified_iii1-15	225522
OTU9374	116	35	15	0	0	0	0	0	0	0	0	11	23	100	73	87	1	0	16	28	0	0	0	154	0	0	0	0	0	0	0	0	0	0	0	0	k__Bacteria	p__Acidobacteria	c__Acidobacteria-6	o__iii1-15	f__unidentified_iii1-15	g__unidentified_iii1-15	s__unidentified_iii1-15	4359104
OTU9610	68	61	53	5	0	1	4	11	6	2	6	44	21	50	54	65	4	0	28	21	4	1	1	128	0	2	0	0	0	0	0	0	0	0	0	0	k__Bacteria	p__Acidobacteria	c__Acidobacteria-6	o__iii1-15	f__unidentified_iii1-15	g__unidentified_iii1-15	s__unidentified_iii1-15	4442074
OTU11494	22	35	21	16	2	0	6	32	1	14	6	31	36	17	14	7	11	0	193	36	84	16	7	3	0	0	0	0	0	0	0	0	0	0	0	0	k__Bacteria	p__Acidobacteria	c__Acidobacteria-6	o__iii1-15	f__unidentified_iii1-15	g__unidentified_iii1-15	s__unidentified_iii1-15	4401482
OTU9306	1	12	20	6	3	0	11	42	9	27	3	21	62	4	37	2	49	2	93	55	80	31	16	0	0	0	0	0	0	0	0	0	4	3	1	0	k__Bacteria	p__Acidobacteria	c__Acidobacteria-6	o__iii1-15	f__unidentified_iii1-15	g__unidentified_iii1-15	s__unidentified_iii1-15	806689
OTU4667	14	26	60	22	0	0	8	19	41	11	1	89	38	6	35	0	8	4	48	70	48	30	4	1	1	0	0	0	0	0	0	0	2	2	1	0	k__Bacteria	p__Acidobacteria	c__Acidobacteria-6	o__iii1-15	f__unidentified_iii1-15	g__unidentified_iii1-15	s__unidentified_iii1-15	4361801
OTU5389	58	82	35	11	6	1	1	0	3	0	2	64	38	43	68	9	2	0	92	28	11	1	0	12	0	0	0	0	0	0	0	0	0	0	0	0	k__Bacteria	p__Acidobacteria	c__Acidobacteria-6	o__iii1-15	f__unidentified_iii1-15	g__unidentified_iii1-15	s__unidentified_iii1-15	4334725
OTU6466	7	10	31	10	0	0	14	49	20	12	1	1	50	8	11	6	69	2	111	45	40	23	18	1	0	0	0	0	0	0	0	0	10	6	1	0	k__Bacteria	p__Acidobacteria	c__Acidobacteria-6	o__iii1-15	f__unidentified_iii1-15	g__unidentified_iii1-15	s__unidentified_iii1-15	319420
OTU2400	53	42	31	5	6	0	14	11	0	0	2	29	33	58	20	60	9	2	72	26	15	0	0	64	0	0	0	0	0	0	0	0	0	0	1	0	k__Bacteria	p__Acidobacteria	c__Acidobacteria-6	o__iii1-15	f__unidentified_iii1-15	g__unidentified_iii1-15	s__unidentified_iii1-15	4463632
OTU10069	69	45	21	16	5	5	14	9	10	8	16	48	35	49	34	17	14	9	20	21	21	3	2	17	0	1	3	0	0	0	1	0	3	1	0	1	k__Bacteria	p__Acidobacteria	c__Acidobacteria-6	o__iii1-15	f__unidentified_iii1-15	g__unidentified_iii1-15	s__unidentified_iii1-15	703224
OTU10953	6	10	9	4	40	11	8	21	6	5	6	17	24	22	36	25	15	12	33	36	35	7	2	49	0	1	0	0	0	0	0	0	23	13	28	12	k__Bacteria	p__Acidobacteria	c__Acidobacteria-6	o__iii1-15	f__unidentified_iii1-15	g__unidentified_iii1-15	s__unidentified_iii1-15	818286
OTU4235	13	2	13	2	1	1	1	7	5	1	0	1	22	26	44	20	7	1	20	24	53	15	3	231	0	0	0	0	0	0	0	0	0	0	0	0	k__Bacteria	p__Acidobacteria	c__Acidobacteria-6	o__iii1-15	f__unidentified_iii1-15	g__unidentified_iii1-15	s__unidentified_iii1-15	4373459
OTU9747	12	13	18	14	7	7	20	19	21	4	12	30	31	16	3	4	40	39	75	24	42	6	6	1	0	2	0	0	0	0	0	0	10	9	8	12	k__Bacteria	p__Acidobacteria	c__Acidobacteria-6	o__iii1-15	f__unidentified_iii1-15	g__unidentified_iii1-15	s__unidentified_iii1-15	4354842
OTU2264	9	15	33	10	7	0	6	17	10	5	14	72	24	38	33	10	7	3	69	24	32	9	14	28	0	0	0	0	0	0	0	0	0	1	0	0	k__Bacteria	p__Acidobacteria	c__Acidobacteria-6	o__iii1-15	f__unidentified_iii1-15	g__unidentified_iii1-15	s__unidentified_iii1-15	811187
OTU2267	63	29	17	2	1	0	1	0	1	0	0	50	17	55	51	40	1	1	26	14	17	0	0	93	0	0	0	0	0	0	0	0	0	0	0	0	k__Bacteria	p__Acidobacteria	c__Acidobacteria-6	o__iii1-15	f__unidentified_iii1-15	g__unidentified_iii1-15	s__unidentified_iii1-15	212676
OTU6937	11	14	28	18	18	6	25	15	11	2	7	13	27	9	9	2	40	34	32	12	23	6	14	3	2	5	0	0	0	3	0	0	19	28	12	24	k__Bacteria	p__Acidobacteria	c__Acidobacteria-6	o__iii1-15	f__unidentified_iii1-15	g__unidentified_iii1-15	s__unidentified_iii1-15	4453467
OTU790	57	17	6	1	0	0	0	0	0	0	2	37	7	48	40	96	1	0	8	7	9	4	0	122	0	0	0	0	0	0	0	0	0	0	0	0	k__Bacteria	p__Acidobacteria	c__Acidobacteria-6	o__iii1-15	f__unidentified_iii1-15	g__unidentified_iii1-15	s__unidentified_iii1-15	4434780
OTU2518	63	33	31	16	7	2	8	11	29	14	6	16	29	16	20	4	33	2	30	21	9	2	5	11	0	0	0	0	0	0	0	0	18	9	6	4	k__Bacteria	p__Acidobacteria	c__Acidobacteria-6	o__iii1-15	f__unidentified_iii1-15	g__unidentified_iii1-15	s__unidentified_iii1-15	714738
OTU3441	27	1	9	0	0	0	2	0	0	0	0	2	0	39	12	136	0	0	3	3	1	0	0	147	0	0	0	0	0	0	0	0	0	0	0	0	k__Bacteria	p__Acidobacteria	c__Acidobacteria-6	o__iii1-15	f__unidentified_iii1-15	g__unidentified_iii1-15	s__unidentified_iii1-15	4112171
OTU24659	0	6	3	2	8	37	23	12	1	0	1	0	0	0	0	0	30	18	0	4	0	0	0	0	0	0	0	0	0	0	1	0	83	42	54	57	k__Bacteria	p__Acidobacteria	c__Acidobacteria-6	o__iii1-15	f__unidentified_iii1-15	g__unidentified_iii1-15	s__unidentified_iii1-15	New.CleanUp.ReferenceOTU75665
OTU3282	2	2	8	8	14	43	21	5	8	2	7	1	10	1	0	1	42	41	9	7	1	0	3	0	0	4	2	0	0	5	0	6	48	33	13	29	k__Bacteria	p__Acidobacteria	c__Acidobacteria-6	o__iii1-15	f__unidentified_iii1-15	g__unidentified_iii1-15	s__unidentified_iii1-15	4424785
OTU2399	1	2	21	5	1	0	1	36	6	2	8	4	45	6	31	3	14	0	21	61	49	25	27	0	0	0	0	0	0	0	0	0	5	0	0	0	k__Bacteria	p__Acidobacteria	c__Acidobacteria-6	o__iii1-15	f__unidentified_iii1-15	g__unidentified_iii1-15	s__unidentified_iii1-15	209061
OTU5924	30	24	44	17	4	0	3	0	0	0	1	29	17	26	29	13	3	0	65	25	17	0	0	25	0	0	0	0	0	0	0	0	0	0	0	0	k__Bacteria	p__Acidobacteria	c__Acidobacteria-6	o__iii1-15	f__unidentified_iii1-15	g__unidentified_iii1-15	s__unidentified_iii1-15	352324
OTU11065	61	87	8	1	0	1	1	0	1	1	0	2	6	46	61	0	0	0	4	21	16	1	0	25	0	0	1	0	0	0	0	0	0	0	2	0	k__Bacteria	p__Acidobacteria	c__Acidobacteria-6	o__iii1-15	f__unidentified_iii1-15	g__unidentified_iii1-15	s__unidentified_iii1-15	4417095
OTU3711	33	14	32	6	1	0	8	7	15	3	1	33	22	33	10	11	16	1	29	16	25	4	0	17	0	0	0	0	0	0	0	0	0	2	1	1	k__Bacteria	p__Acidobacteria	c__Acidobacteria-6	o__iii1-15	f__unidentified_iii1-15	g__unidentified_iii1-15	s__unidentified_iii1-15	113191
OTU4817	23	31	13	10	0	0	6	16	1	7	9	43	29	9	23	2	4	2	48	19	26	5	0	11	0	0	0	0	0	0	0	0	0	0	1	0	k__Bacteria	p__Acidobacteria	c__Acidobacteria-6	o__iii1-15	f__unidentified_iii1-15	g__unidentified_iii1-15	s__unidentified_iii1-15	226288
OTU4932	42	14	32	4	0	0	5	4	1	1	5	19	8	39	23	40	8	0	19	11	14	1	0	37	0	0	0	0	0	0	0	0	0	0	0	0	k__Bacteria	p__Acidobacteria	c__Acidobacteria-6	o__iii1-15	f__unidentified_iii1-15	g__unidentified_iii1-15	s__unidentified_iii1-15	4330047
OTU4504	53	9	3	0	0	0	0	0	0	0	0	2	2	30	13	140	0	0	0	0	0	0	0	68	0	0	0	0	0	0	0	0	0	0	0	0	k__Bacteria	p__Acidobacteria	c__Acidobacteria-6	o__iii1-15	f__unidentified_iii1-15	g__unidentified_iii1-15	s__unidentified_iii1-15	3093679
OTU6405	86	48	6	0	0	0	0	0	2	0	0	3	11	33	20	32	0	0	3	24	9	4	0	35	0	0	0	0	0	0	0	0	0	0	0	0	k__Bacteria	p__Acidobacteria	c__Acidobacteria-6	o__iii1-15	f__unidentified_iii1-15	g__unidentified_iii1-15	s__unidentified_iii1-15	121575
OTU7243	20	22	40	6	3	0	7	2	2	0	0	32	42	8	15	0	16	1	39	33	2	0	0	3	0	1	0	0	0	0	0	0	0	0	0	0	k__Bacteria	p__Acidobacteria	c__Acidobacteria-6	o__iii1-15	f__unidentified_iii1-15	g__unidentified_iii1-15	s__unidentified_iii1-15	321991
OTU6550	11	2	46	21	4	0	2	20	39	14	1	10	7	4	9	3	1	0	10	14	38	7	10	0	0	0	0	0	0	0	0	0	12	6	1	0	k__Bacteria	p__Acidobacteria	c__Acidobacteria-6	o__iii1-15	f__unidentified_iii1-15	g__unidentified_iii1-15	s__unidentified_iii1-15	151517
OTU5042	5	4	7	7	4	2	10	20	5	19	4	1	22	0	2	0	6	0	47	21	48	30	22	0	0	0	0	0	0	0	0	0	0	0	0	0	k__Bacteria	p__Acidobacteria	c__Acidobacteria-6	o__iii1-15	f__unidentified_iii1-15	g__unidentified_iii1-15	s__unidentified_iii1-15	689024
OTU2855	6	1	16	13	1	0	3	14	17	5	3	6	11	3	11	1	16	0	66	18	18	16	27	0	0	0	0	0	0	0	0	0	2	0	1	0	k__Bacteria	p__Acidobacteria	c__Acidobacteria-6	o__iii1-15	f__unidentified_iii1-15	g__unidentified_iii1-15	s__unidentified_iii1-15	763448
OTU6059	58	25	13	2	0	0	2	0	0	0	0	46	12	29	31	0	0	0	5	2	2	0	0	48	0	0	0	0	0	0	0	0	0	0	0	0	k__Bacteria	p__Acidobacteria	c__Acidobacteria-6	o__iii1-15	f__unidentified_iii1-15	g__unidentified_iii1-15	s__unidentified_iii1-15	823439
OTU3019	30	9	10	2	0	0	1	6	4	0	0	1	8	39	19	11	1	2	17	5	15	1	0	23	0	11	12	0	6	2	8	8	6	1	2	0	k__Bacteria	p__Acidobacteria	c__Acidobacteria-6	o__iii1-15	f__unidentified_iii1-15	g__unidentified_iii1-15	s__unidentified_iii1-15	207042
OTU23893	0	0	2	1	0	3	9	20	27	18	12	1	7	0	0	0	27	10	14	3	6	17	29	0	0	2	0	0	0	0	2	1	13	9	3	24	k__Bacteria	p__Acidobacteria	c__Acidobacteria-6	o__iii1-15	f__unidentified_iii1-15	g__unidentified_iii1-15	s__unidentified_iii1-15	New.CleanUp.ReferenceOTU70767
OTU1818	5	5	13	1	2	0	9	12	2	0	1	29	29	9	7	1	9	7	51	18	27	8	4	0	0	1	0	0	0	0	1	1	0	4	3	0	k__Bacteria	p__Acidobacteria	c__Acidobacteria-6	o__iii1-15	f__unidentified_iii1-15	g__unidentified_iii1-15	s__unidentified_iii1-15	316541
OTU1248	5	12	10	11	46	0	9	8	3	4	6	13	28	3	3	0	32	9	13	19	11	9	0	0	0	2	0	0	0	0	0	0	0	0	2	0	k__Bacteria	p__Acidobacteria	c__Acidobacteria-6	o__iii1-15	f__unidentified_iii1-15	g__unidentified_iii1-15	s__unidentified_iii1-15	1126015
OTU7122	0	0	9	12	0	0	1	16	1	1	0	1	34	1	3	0	2	0	75	38	23	6	19	0	0	0	0	0	0	0	0	0	13	2	1	0	k__Bacteria	p__Acidobacteria	c__Acidobacteria-6	o__iii1-15	f__unidentified_iii1-15	g__unidentified_iii1-15	s__unidentified_iii1-15	641612
OTU2408	45	23	10	3	0	0	3	4	1	0	0	13	16	33	33	11	8	0	7	12	9	3	0	23	0	0	0	0	0	0	0	0	0	0	0	0	k__Bacteria	p__Acidobacteria	c__Acidobacteria-6	o__iii1-15	f__unidentified_iii1-15	g__unidentified_iii1-15	s__unidentified_iii1-15	4369842
OTU2444	21	10	4	12	25	1	7	15	4	6	11	17	11	21	17	2	13	1	11	9	5	3	4	18	0	0	0	0	0	0	0	0	2	4	3	0	k__Bacteria	p__Acidobacteria	c__Acidobacteria-6	o__iii1-15	f__unidentified_iii1-15	g__unidentified_iii1-15	s__unidentified_iii1-15	1967615
OTU4290	13	10	5	3	1	0	3	8	8	3	0	8	14	24	7	4	14	5	32	13	10	5	6	5	0	0	0	0	0	0	0	0	9	10	3	10	k__Bacteria	p__Acidobacteria	c__Acidobacteria-6	o__iii1-15	f__unidentified_iii1-15	g__unidentified_iii1-15	s__unidentified_iii1-15	723493
OTU407	32	12	12	2	1	0	1	7	4	0	2	13	11	41	29	13	0	0	13	11	8	3	3	13	0	0	0	0	0	0	0	0	0	0	0	0	k__Bacteria	p__Acidobacteria	c__Acidobacteria-6	o__iii1-15	f__unidentified_iii1-15	g__unidentified_iii1-15	s__unidentified_iii1-15	3036442
OTU1530	24	13	18	8	3	0	0	2	0	0	0	4	11	29	19	17	0	2	39	16	12	0	0	12	0	0	0	0	0	0	0	0	1	0	0	0	k__Bacteria	p__Acidobacteria	c__Acidobacteria-6	o__iii1-15	f__unidentified_iii1-15	g__unidentified_iii1-15	s__unidentified_iii1-15	348270
OTU11264	3	4	10	4	0	0	0	0	3	0	0	18	16	2	17	7	0	0	6	8	44	15	0	65	0	0	0	0	0	0	0	0	0	0	0	0	k__Bacteria	p__Acidobacteria	c__Acidobacteria-6	o__iii1-15	f__unidentified_iii1-15	g__unidentified_iii1-15	s__unidentified_iii1-15	311603
OTU5949	24	6	0	0	0	0	0	0	0	0	0	5	4	36	41	20	0	0	0	4	0	0	0	76	0	1	0	0	0	0	0	0	0	0	0	0	k__Bacteria	p__Acidobacteria	c__Acidobacteria-6	o__iii1-15	f__unidentified_iii1-15	g__unidentified_iii1-15	s__unidentified_iii1-15	4404738
OTU3145	0	2	6	0	5	20	8	8	13	7	4	1	13	0	0	0	54	11	9	12	2	2	0	1	0	0	0	0	0	0	0	0	15	9	6	4	k__Bacteria	p__Acidobacteria	c__Acidobacteria-6	o__iii1-15	f__unidentified_iii1-15	g__unidentified_iii1-15	s__unidentified_iii1-15	1107738
OTU4567	63	0	0	0	0	0	0	0	0	0	0	0	0	11	15	40	0	0	0	0	0	0	0	76	0	0	0	0	0	0	0	0	0	0	0	0	k__Bacteria	p__Acidobacteria	c__Acidobacteria-6	o__iii1-15	f__unidentified_iii1-15	g__unidentified_iii1-15	s__unidentified_iii1-15	4411327
OTU8832	13	23	10	4	1	0	0	5	1	0	0	5	15	42	33	3	2	2	11	19	6	2	0	6	0	0	0	0	0	0	0	0	1	0	0	0	k__Bacteria	p__Acidobacteria	c__Acidobacteria-6	o__iii1-15	f__unidentified_iii1-15	g__unidentified_iii1-15	s__unidentified_iii1-15	89144
OTU12297	7	5	12	6	5	0	3	4	5	3	15	13	14	17	5	7	10	3	19	18	11	7	1	11	0	0	0	0	0	0	0	0	0	0	0	0	k__Bacteria	p__Acidobacteria	c__Acidobacteria-6	o__iii1-15	f__unidentified_iii1-15	g__unidentified_iii1-15	s__unidentified_iii1-15	New.ReferenceOTU947
OTU3650	16	2	0	0	0	0	1	0	0	0	0	5	4	39	15	50	0	0	1	1	0	0	0	66	0	0	0	0	0	0	0	0	0	0	0	0	k__Bacteria	p__Acidobacteria	c__Acidobacteria-6	o__iii1-15	f__unidentified_iii1-15	g__unidentified_iii1-15	s__unidentified_iii1-15	35478
OTU5955	30	6	4	1	0	0	0	2	0	0	0	2	16	35	45	7	2	0	4	24	10	1	0	6	0	0	0	0	0	0	0	0	0	0	0	0	k__Bacteria	p__Acidobacteria	c__Acidobacteria-6	o__iii1-15	f__unidentified_iii1-15	g__unidentified_iii1-15	s__unidentified_iii1-15	322919
OTU8348	0	0	5	3	0	0	0	2	1	0	0	5	19	6	13	0	7	0	56	27	29	17	2	0	0	0	0	0	0	0	0	0	1	0	0	0	k__Bacteria	p__Acidobacteria	c__Acidobacteria-6	o__iii1-15	f__unidentified_iii1-15	g__unidentified_iii1-15	s__unidentified_iii1-15	1961387
OTU10481	4	2	2	0	0	0	0	0	0	0	0	10	18	11	36	13	0	1	27	29	8	5	0	27	0	0	0	0	0	0	0	0	0	0	0	0	k__Bacteria	p__Acidobacteria	c__Acidobacteria-6	o__iii1-15	f__unidentified_iii1-15	g__unidentified_iii1-15	s__unidentified_iii1-15	311250
OTU5835	9	19	21	9	3	0	2	2	3	1	1	11	6	13	22	3	3	3	22	20	7	0	0	3	0	0	0	0	0	1	0	1	1	0	2	2	k__Bacteria	p__Acidobacteria	c__Acidobacteria-6	o__iii1-15	f__unidentified_iii1-15	g__unidentified_iii1-15	s__unidentified_iii1-15	564526
OTU8016	0	1	7	0	0	0	3	19	3	13	3	1	13	1	0	0	15	0	40	7	29	25	7	1	0	0	0	0	0	0	0	0	0	0	0	0	k__Bacteria	p__Acidobacteria	c__Acidobacteria-6	o__iii1-15	f__unidentified_iii1-15	g__unidentified_iii1-15	s__unidentified_iii1-15	2631018
OTU7598	17	27	16	1	1	0	0	0	0	0	3	18	8	23	11	4	0	0	25	19	3	0	0	3	0	0	0	0	0	0	0	0	0	0	0	0	k__Bacteria	p__Acidobacteria	c__Acidobacteria-6	o__iii1-15	f__unidentified_iii1-15	g__unidentified_iii1-15	s__unidentified_iii1-15	4333415
OTU11268	6	4	10	2	2	0	10	6	2	1	4	3	7	5	1	29	12	19	16	10	4	2	1	3	0	4	0	0	0	0	1	0	0	2	3	5	k__Bacteria	p__Acidobacteria	c__Acidobacteria-6	o__iii1-15	f__unidentified_iii1-15	g__unidentified_iii1-15	s__unidentified_iii1-15	4334886
OTU10154	35	2	0	0	0	0	0	0	0	0	0	9	0	16	17	31	0	0	0	0	0	0	0	61	0	0	0	0	0	0	0	0	0	0	0	0	k__Bacteria	p__Acidobacteria	c__Acidobacteria-6	o__iii1-15	f__unidentified_iii1-15	g__unidentified_iii1-15	s__unidentified_iii1-15	1925459
OTU7169	9	5	3	0	0	0	0	2	0	0	3	2	2	17	8	44	1	0	4	6	1	4	0	49	0	0	0	0	0	0	0	0	2	0	0	0	k__Bacteria	p__Acidobacteria	c__Acidobacteria-6	o__iii1-15	f__unidentified_iii1-15	g__unidentified_iii1-15	s__unidentified_iii1-15	4335335
OTU9958	14	2	0	0	0	0	0	0	0	0	0	2	11	19	12	9	0	0	3	1	2	0	0	87	0	0	0	0	0	0	0	0	0	0	0	0	k__Bacteria	p__Acidobacteria	c__Acidobacteria-6	o__iii1-15	f__unidentified_iii1-15	g__unidentified_iii1-15	s__unidentified_iii1-15	543528
OTU7106	4	2	7	5	0	0	0	3	0	0	0	0	9	0	16	6	0	0	50	40	9	1	0	0	0	0	0	0	0	0	0	0	0	0	0	0	k__Bacteria	p__Acidobacteria	c__Acidobacteria-6	o__iii1-15	f__unidentified_iii1-15	g__unidentified_iii1-15	s__unidentified_iii1-15	361764
OTU9365	23	9	3	1	0	0	0	0	0	0	0	13	8	19	20	18	0	0	4	10	0	0	0	21	0	0	0	0	0	0	0	0	0	0	0	0	k__Bacteria	p__Acidobacteria	c__Acidobacteria-6	o__iii1-15	f__unidentified_iii1-15	g__unidentified_iii1-15	s__unidentified_iii1-15	4428775
OTU5419	23	8	12	4	0	0	1	1	0	0	2	19	6	22	19	6	0	0	12	8	4	0	0	1	0	0	0	0	0	0	0	0	0	0	0	0	k__Bacteria	p__Acidobacteria	c__Acidobacteria-6	o__iii1-15	f__unidentified_iii1-15	g__unidentified_iii1-15	s__unidentified_iii1-15	4091471
OTU7128	4	0	1	0	0	0	0	0	0	0	0	0	0	5	12	11	0	0	1	0	0	0	0	114	0	0	0	0	0	0	0	0	0	0	0	0	k__Bacteria	p__Acidobacteria	c__Acidobacteria-6	o__iii1-15	f__unidentified_iii1-15	g__unidentified_iii1-15	s__unidentified_iii1-15	647472
OTU2858	30	6	6	0	1	1	2	5	1	1	0	1	4	18	14	4	12	0	10	14	7	0	0	8	0	0	0	0	0	0	0	0	0	0	1	1	k__Bacteria	p__Acidobacteria	c__Acidobacteria-6	o__iii1-15	f__unidentified_iii1-15	g__unidentified_iii1-15	s__unidentified_iii1-15	226487
OTU11739	1	0	9	1	1	0	8	6	12	5	7	14	9	0	2	1	6	4	8	11	5	3	11	0	0	0	0	0	0	0	0	0	6	7	8	2	k__Bacteria	p__Acidobacteria	c__Acidobacteria-6	o__iii1-15	f__unidentified_iii1-15	g__unidentified_iii1-15	s__unidentified_iii1-15	New.ReferenceOTU290
OTU22612	30	12	18	5	0	0	1	2	1	0	0	10	5	13	9	1	1	0	2	9	13	1	1	9	0	0	0	0	0	0	0	0	0	0	0	1	k__Bacteria	p__Acidobacteria	c__Acidobacteria-6	o__iii1-15	f__unidentified_iii1-15	g__unidentified_iii1-15	s__unidentified_iii1-15	New.CleanUp.ReferenceOTU62557
OTU10343	4	2	5	3	4	3	16	6	5	2	1	1	19	2	6	0	6	4	28	4	4	4	6	0	0	0	0	0	0	0	0	0	2	0	0	2	k__Bacteria	p__Acidobacteria	c__Acidobacteria-6	o__iii1-15	f__unidentified_iii1-15	g__unidentified_iii1-15	s__unidentified_iii1-15	218467
OTU9504	17	10	5	2	0	0	0	0	0	0	0	18	4	20	20	13	0	2	2	4	0	0	0	15	0	0	0	0	0	0	0	0	0	0	0	0	k__Bacteria	p__Acidobacteria	c__Acidobacteria-6	o__iii1-15	f__unidentified_iii1-15	g__unidentified_iii1-15	s__unidentified_iii1-15	2815106
OTU7671	15	0	4	0	0	0	1	0	0	0	0	0	1	4	1	72	1	0	3	0	0	0	0	27	0	0	0	0	0	0	0	0	0	0	0	0	k__Bacteria	p__Acidobacteria	c__Acidobacteria-6	o__iii1-15	f__unidentified_iii1-15	g__unidentified_iii1-15	s__unidentified_iii1-15	2447176
OTU12247	5	30	2	10	4	0	1	8	1	4	0	4	3	2	2	3	0	0	10	9	15	13	1	0	0	0	0	0	0	0	0	0	0	0	0	0	k__Bacteria	p__Acidobacteria	c__Acidobacteria-6	o__iii1-15	f__unidentified_iii1-15	g__unidentified_iii1-15	s__unidentified_iii1-15	New.ReferenceOTU129
OTU2002	6	3	10	3	0	0	0	5	1	0	0	14	12	1	9	2	0	0	33	18	2	0	0	5	0	0	0	0	0	0	0	0	0	0	0	0	k__Bacteria	p__Acidobacteria	c__Acidobacteria-6	o__iii1-15	f__unidentified_iii1-15	g__unidentified_iii1-15	s__unidentified_iii1-15	324357
OTU6215	10	22	10	5	0	0	2	4	2	0	2	3	4	8	4	1	5	6	12	13	3	1	1	3	0	0	0	0	0	0	0	0	0	2	0	0	k__Bacteria	p__Acidobacteria	c__Acidobacteria-6	o__iii1-15	f__unidentified_iii1-15	g__unidentified_iii1-15	s__unidentified_iii1-15	783801
OTU4934	11	4	14	1	0	0	2	5	0	0	0	6	4	12	10	29	1	0	3	8	2	0	0	9	0	0	0	0	0	0	0	0	0	0	0	0	k__Bacteria	p__Acidobacteria	c__Acidobacteria-6	o__iii1-15	f__unidentified_iii1-15	g__unidentified_iii1-15	s__unidentified_iii1-15	816505
OTU9199	11	4	1	0	0	0	0	0	1	0	0	0	4	18	25	4	0	0	3	13	0	0	0	37	0	0	0	0	0	0	0	0	0	0	0	0	k__Bacteria	p__Acidobacteria	c__Acidobacteria-6	o__iii1-15	f__unidentified_iii1-15	g__unidentified_iii1-15	s__unidentified_iii1-15	1080447
OTU9210	9	5	6	3	9	2	8	1	0	0	1	3	6	12	7	3	1	11	13	6	3	0	0	1	0	1	1	0	0	0	0	0	3	2	1	3	k__Bacteria	p__Acidobacteria	c__Acidobacteria-6	o__iii1-15	f__unidentified_iii1-15	g__unidentified_iii1-15	s__unidentified_iii1-15	728640
OTU8376	20	16	3	1	0	0	0	0	0	0	0	2	7	15	18	16	0	0	0	4	0	0	0	16	0	0	0	0	0	0	0	0	0	0	0	0	k__Bacteria	p__Acidobacteria	c__Acidobacteria-6	o__iii1-15	f__unidentified_iii1-15	g__unidentified_iii1-15	s__unidentified_iii1-15	4345881
OTU13859	2	5	9	2	0	0	4	7	2	3	8	24	9	0	0	1	7	0	9	5	14	3	0	2	0	0	0	0	0	0	0	0	0	1	0	0	k__Bacteria	p__Acidobacteria	c__Acidobacteria-6	o__iii1-15	f__unidentified_iii1-15	g__unidentified_iii1-15	s__unidentified_iii1-15	New.CleanUp.ReferenceOTU8856
OTU11565	0	0	3	4	0	0	7	8	3	0	1	1	8	0	0	0	11	13	7	5	6	10	3	0	0	0	0	0	0	0	0	0	4	10	5	4	k__Bacteria	p__Acidobacteria	c__Acidobacteria-6	o__iii1-15	f__unidentified_iii1-15	g__unidentified_iii1-15	s__unidentified_iii1-15	New.ReferenceOTU325
OTU14531	23	27	1	0	0	0	0	0	2	0	0	15	4	14	8	0	0	0	3	8	0	0	0	7	0	0	0	0	0	0	0	0	0	0	0	0	k__Bacteria	p__Acidobacteria	c__Acidobacteria-6	o__iii1-15	f__unidentified_iii1-15	g__unidentified_iii1-15	s__unidentified_iii1-15	New.CleanUp.ReferenceOTU13069
OTU6715	17	4	7	0	1	0	0	0	0	0	0	2	0	11	6	50	0	0	1	0	1	0	0	11	0	0	0	0	0	0	0	0	0	0	0	0	k__Bacteria	p__Acidobacteria	c__Acidobacteria-6	o__iii1-15	f__unidentified_iii1-15	g__unidentified_iii1-15	s__unidentified_iii1-15	4341171
OTU10303	13	15	7	0	0	0	1	2	2	1	0	2	1	1	7	6	0	6	10	4	4	1	1	3	0	0	0	0	0	0	0	0	4	4	5	6	k__Bacteria	p__Acidobacteria	c__Acidobacteria-6	o__iii1-15	f__unidentified_iii1-15	g__unidentified_iii1-15	s__unidentified_iii1-15	4463684
OTU41748	20	15	1	2	0	0	0	0	0	0	0	1	5	24	19	1	0	0	6	4	5	2	0	0	0	0	0	0	0	0	0	0	0	0	0	0	k__Bacteria	p__Acidobacteria	c__Acidobacteria-6	o__iii1-15	f__unidentified_iii1-15	g__unidentified_iii1-15	s__unidentified_iii1-15	New.CleanUp.ReferenceOTU186268
OTU4650	1	0	4	3	0	0	0	4	0	7	2	7	8	1	1	0	0	0	25	12	15	8	5	1	0	0	0	0	0	0	0	0	0	0	0	0	k__Bacteria	p__Acidobacteria	c__Acidobacteria-6	o__iii1-15	f__unidentified_iii1-15	g__unidentified_iii1-15	s__unidentified_iii1-15	734098
OTU26404	1	0	1	0	5	3	12	0	1	0	0	0	1	0	0	0	1	4	1	0	0	0	0	1	3	1	11	2	5	24	3	8	0	0	14	0	k__Bacteria	p__Acidobacteria	c__Acidobacteria-6	o__iii1-15	f__unidentified_iii1-15	g__unidentified_iii1-15	s__unidentified_iii1-15	New.CleanUp.ReferenceOTU86981
OTU350	9	2	4	0	0	0	0	0	0	0	0	5	2	4	3	2	0	0	26	12	6	0	0	22	0	0	0	0	0	0	0	0	0	0	0	0	k__Bacteria	p__Acidobacteria	c__Acidobacteria-6	o__iii1-15	f__unidentified_iii1-15	g__unidentified_iii1-15	s__unidentified_iii1-15	334113
OTU4424	2	1	7	2	2	0	3	4	0	0	3	1	5	3	1	3	6	1	10	2	12	2	3	0	1	6	0	2	2	9	0	2	0	0	0	2	k__Bacteria	p__Acidobacteria	c__Acidobacteria-6	o__iii1-15	f__unidentified_iii1-15	g__unidentified_iii1-15	s__unidentified_iii1-15	4446019
OTU11575	0	1	8	4	9	0	3	4	0	2	0	6	11	0	4	0	6	0	9	8	15	2	0	0	0	0	0	0	0	0	0	0	0	0	0	0	k__Bacteria	p__Acidobacteria	c__Acidobacteria-6	o__iii1-15	f__unidentified_iii1-15	g__unidentified_iii1-15	s__unidentified_iii1-15	New.ReferenceOTU735
OTU14277	1	3	3	0	1	0	0	0	0	0	0	36	5	8	16	0	0	2	1	1	2	2	0	3	0	0	1	0	0	0	0	0	4	0	2	1	k__Bacteria	p__Acidobacteria	c__Acidobacteria-6	o__iii1-15	f__unidentified_iii1-15	g__unidentified_iii1-15	s__unidentified_iii1-15	New.CleanUp.ReferenceOTU11418
OTU8505	1	15	2	1	1	6	2	1	1	2	2	0	1	0	0	4	1	7	1	2	2	1	0	12	0	1	0	0	0	0	0	0	2	4	7	11	k__Bacteria	p__Acidobacteria	c__Acidobacteria-6	o__iii1-15	f__unidentified_iii1-15	g__unidentified_iii1-15	s__unidentified_iii1-15	4329544
OTU9884	2	1	2	1	0	0	0	2	2	1	1	5	7	6	14	6	5	1	12	8	3	2	0	7	0	0	0	0	0	0	0	0	0	0	0	0	k__Bacteria	p__Acidobacteria	c__Acidobacteria-6	o__iii1-15	f__unidentified_iii1-15	g__unidentified_iii1-15	s__unidentified_iii1-15	605483
OTU10113	11	12	10	1	0	0	0	0	0	0	0	0	3	5	14	3	0	0	14	14	1	0	0	0	0	0	0	0	0	0	0	0	0	0	0	0	k__Bacteria	p__Acidobacteria	c__Acidobacteria-6	o__iii1-15	f__unidentified_iii1-15	g__unidentified_iii1-15	s__unidentified_iii1-15	1847
OTU4238	25	1	0	0	0	0	0	0	0	0	0	0	0	20	6	6	0	0	0	0	0	0	0	29	0	0	0	0	0	0	0	0	0	0	0	0	k__Bacteria	p__Acidobacteria	c__Acidobacteria-6	o__iii1-15	f__unidentified_iii1-15	g__unidentified_iii1-15	s__unidentified_iii1-15	328810
OTU8839	16	1	2	0	0	0	0	0	0	0	1	2	0	6	1	23	0	0	9	0	0	0	0	26	0	0	0	0	0	0	0	0	0	0	0	0	k__Bacteria	p__Acidobacteria	c__Acidobacteria-6	o__iii1-15	f__unidentified_iii1-15	g__unidentified_iii1-15	s__unidentified_iii1-15	576508
OTU759	6	0	0	0	0	0	0	0	0	0	0	0	0	2	3	47	0	0	0	1	0	0	0	25	0	0	0	0	0	0	0	0	0	0	0	0	k__Bacteria	p__Acidobacteria	c__Acidobacteria-6	o__iii1-15	f__unidentified_iii1-15	g__unidentified_iii1-15	s__unidentified_iii1-15	257461
OTU42594	0	2	0	1	0	0	2	5	2	14	6	2	10	0	0	0	2	0	7	1	7	14	9	0	0	0	0	0	0	0	0	0	0	0	0	0	k__Bacteria	p__Acidobacteria	c__Acidobacteria-6	o__iii1-15	f__unidentified_iii1-15	g__unidentified_iii1-15	s__unidentified_iii1-15	New.CleanUp.ReferenceOTU191250
OTU7657	1	1	0	0	1	0	0	2	0	0	0	0	15	9	2	11	3	0	22	4	5	2	2	0	0	0	0	0	0	0	0	0	1	2	0	0	k__Bacteria	p__Acidobacteria	c__Acidobacteria-6	o__iii1-15	f__unidentified_iii1-15	g__unidentified_iii1-15	s__unidentified_iii1-15	541741
OTU8975	3	11	3	1	1	6	3	2	0	0	2	3	0	0	3	0	1	2	2	1	1	0	2	0	3	9	2	0	3	7	0	10	2	0	0	0	k__Bacteria	p__Acidobacteria	c__Acidobacteria-6	o__iii1-15	f__unidentified_iii1-15	g__unidentified_iii1-15	s__unidentified_iii1-15	751947
OTU9299	23	1	1	0	0	0	0	0	0	0	0	0	0	21	8	5	0	0	0	0	0	0	0	24	0	0	0	0	0	0	0	0	0	0	0	0	k__Bacteria	p__Acidobacteria	c__Acidobacteria-6	o__iii1-15	f__unidentified_iii1-15	g__unidentified_iii1-15	s__unidentified_iii1-15	2921823
OTU3254	5	16	0	1	3	2	8	4	0	2	0	4	7	1	1	0	1	1	8	8	3	2	2	0	0	1	0	0	0	0	0	0	0	1	0	0	k__Bacteria	p__Acidobacteria	c__Acidobacteria-6	o__iii1-15	f__unidentified_iii1-15	g__unidentified_iii1-15	s__unidentified_iii1-15	4386443
OTU8145	17	1	0	0	0	0	0	0	0	0	0	0	9	0	5	6	18	0	2	1	0	0	0	21	0	0	0	0	0	0	0	0	0	0	0	0	k__Bacteria	p__Acidobacteria	c__Acidobacteria-6	o__iii1-15	f__unidentified_iii1-15	g__unidentified_iii1-15	s__unidentified_iii1-15	800050
OTU3906	8	2	0	2	0	0	0	0	0	0	0	1	0	12	2	24	0	0	1	0	0	0	0	26	0	0	0	0	0	0	0	0	0	0	0	0	k__Bacteria	p__Acidobacteria	c__Acidobacteria-6	o__iii1-15	f__unidentified_iii1-15	g__unidentified_iii1-15	s__unidentified_iii1-15	4327717
OTU8008	10	4	5	7	1	0	1	4	1	0	0	12	6	5	8	0	0	1	4	6	3	0	0	0	0	0	0	0	0	0	0	0	0	0	0	0	k__Bacteria	p__Acidobacteria	c__Acidobacteria-6	o__iii1-15	f__unidentified_iii1-15	g__unidentified_iii1-15	s__unidentified_iii1-15	4472087
OTU37200	16	5	0	0	0	0	2	0	0	0	0	3	0	24	9	7	0	0	1	2	1	0	0	8	0	0	0	0	0	0	0	0	0	0	0	0	k__Bacteria	p__Acidobacteria	c__Acidobacteria-6	o__iii1-15	f__unidentified_iii1-15	g__unidentified_iii1-15	s__unidentified_iii1-15	New.CleanUp.ReferenceOTU157779
OTU12264	11	1	0	0	0	0	0	0	0	0	0	2	4	14	20	2	0	0	1	1	0	0	0	20	0	0	0	0	0	0	0	0	0	0	0	0	k__Bacteria	p__Acidobacteria	c__Acidobacteria-6	o__iii1-15	f__unidentified_iii1-15	g__unidentified_iii1-15	s__unidentified_iii1-15	New.ReferenceOTU539
OTU4038	0	5	5	0	5	0	2	6	1	3	1	1	12	0	0	8	0	0	9	3	4	3	0	3	0	0	1	0	0	1	0	0	2	0	0	0	k__Bacteria	p__Acidobacteria	c__Acidobacteria-6	o__iii1-15	f__unidentified_iii1-15	g__unidentified_iii1-15	s__unidentified_iii1-15	338196
OTU23102	0	4	6	4	0	1	0	10	5	5	1	4	4	2	0	0	3	0	3	3	8	7	5	0	0	0	0	0	0	0	0	0	0	0	0	0	k__Bacteria	p__Acidobacteria	c__Acidobacteria-6	o__iii1-15	f__unidentified_iii1-15	g__unidentified_iii1-15	s__unidentified_iii1-15	New.CleanUp.ReferenceOTU65798
OTU6559	0	0	0	0	0	0	0	0	0	0	0	0	0	3	0	4	0	0	0	0	0	0	0	67	0	0	0	0	0	0	0	0	0	0	0	0	k__Bacteria	p__Acidobacteria	c__Acidobacteria-6	o__iii1-15	f__unidentified_iii1-15	g__unidentified_iii1-15	s__unidentified_iii1-15	2034121
OTU51272	0	2	22	6	0	0	2	6	1	0	1	0	9	0	2	0	3	0	14	5	1	0	0	0	0	0	0	0	0	0	0	0	0	0	0	0	k__Bacteria	p__Acidobacteria	c__Acidobacteria-6	o__iii1-15	f__unidentified_iii1-15	g__unidentified_iii1-15	s__unidentified_iii1-15	New.CleanUp.ReferenceOTU244259
OTU7416	8	2	0	0	0	0	0	0	0	0	0	0	0	6	2	26	0	0	0	0	0	0	0	29	0	0	0	0	0	0	0	0	0	0	0	0	k__Bacteria	p__Acidobacteria	c__Acidobacteria-6	o__iii1-15	f__unidentified_iii1-15	g__unidentified_iii1-15	s__unidentified_iii1-15	816631
OTU4736	3	1	1	0	0	0	3	5	0	0	1	9	5	0	2	7	1	0	17	4	9	2	0	1	0	0	0	0	0	0	0	0	0	1	0	0	k__Bacteria	p__Acidobacteria	c__Acidobacteria-6	o__iii1-15	f__unidentified_iii1-15	g__unidentified_iii1-15	s__unidentified_iii1-15	309002
OTU47505	0	0	0	0	1	0	1	6	9	7	6	3	4	0	0	0	5	1	3	2	4	7	8	0	0	0	0	0	0	0	0	0	1	0	0	0	k__Bacteria	p__Acidobacteria	c__Acidobacteria-6	o__iii1-15	f__unidentified_iii1-15	g__unidentified_iii1-15	s__unidentified_iii1-15	New.CleanUp.ReferenceOTU220924
OTU9055	7	0	0	0	0	0	0	0	0	0	0	0	0	6	2	36	0	0	0	0	0	0	0	16	0	0	0	0	0	0	0	0	0	0	0	0	k__Bacteria	p__Acidobacteria	c__Acidobacteria-6	o__iii1-15	f__unidentified_iii1-15	g__unidentified_iii1-15	s__unidentified_iii1-15	4382696
OTU8058	3	0	4	0	0	0	0	0	0	0	0	0	0	5	4	24	0	0	0	0	0	0	0	24	0	0	0	0	0	0	0	0	0	0	0	0	k__Bacteria	p__Acidobacteria	c__Acidobacteria-6	o__iii1-15	f__unidentified_iii1-15	g__unidentified_iii1-15	s__unidentified_iii1-15	582391
OTU8648	0	0	0	0	0	0	0	0	0	0	0	0	0	3	2	16	0	0	0	0	0	0	0	43	0	0	0	0	0	0	0	0	0	0	0	0	k__Bacteria	p__Acidobacteria	c__Acidobacteria-6	o__iii1-15	f__unidentified_iii1-15	g__unidentified_iii1-15	s__unidentified_iii1-15	240298
OTU43206	0	0	0	0	9	5	16	0	0	0	0	0	0	0	0	0	0	6	0	0	0	0	0	0	0	1	3	0	1	16	0	2	0	0	3	1	k__Bacteria	p__Acidobacteria	c__Acidobacteria-6	o__iii1-15	f__unidentified_iii1-15	g__unidentified_iii1-15	s__unidentified_iii1-15	New.CleanUp.ReferenceOTU194783
OTU52071	12	1	0	0	0	0	0	0	0	0	0	1	3	16	11	5	0	0	0	0	0	0	0	14	0	0	0	0	0	0	0	0	0	0	0	0	k__Bacteria	p__Acidobacteria	c__Acidobacteria-6	o__iii1-15	f__unidentified_iii1-15	g__unidentified_iii1-15	s__unidentified_iii1-15	New.CleanUp.ReferenceOTU249136
OTU8788	7	0	0	0	0	0	0	0	0	0	0	0	0	1	0	16	0	0	0	0	0	0	0	38	0	0	0	0	0	0	0	0	0	0	0	0	k__Bacteria	p__Acidobacteria	c__Acidobacteria-6	o__iii1-15	f__unidentified_iii1-15	g__unidentified_iii1-15	s__unidentified_iii1-15	1818
OTU11942	0	2	1	1	0	0	2	5	1	7	2	1	6	1	0	0	3	0	7	1	4	1	14	0	0	0	0	0	0	0	0	0	2	0	0	0	k__Bacteria	p__Acidobacteria	c__Acidobacteria-6	o__iii1-15	f__unidentified_iii1-15	g__unidentified_iii1-15	s__unidentified_iii1-15	New.ReferenceOTU594
OTU1270	11	6	2	0	0	0	0	0	0	0	0	6	1	7	9	6	0	0	1	0	0	0	0	11	0	0	0	0	0	0	0	0	0	0	0	0	k__Bacteria	p__Acidobacteria	c__Acidobacteria-6	o__iii1-15	f__unidentified_iii1-15	g__unidentified_iii1-15	s__unidentified_iii1-15	812200
OTU330	2	3	2	0	0	0	1	5	2	0	0	2	3	3	2	8	2	3	9	4	1	2	0	0	0	0	0	0	0	0	0	0	0	1	2	1	k__Bacteria	p__Acidobacteria	c__Acidobacteria-6	o__iii1-15	f__unidentified_iii1-15	g__unidentified_iii1-15	s__unidentified_iii1-15	4348417
OTU7753	0	1	1	0	4	0	3	3	2	6	4	2	0	1	0	0	4	1	6	1	3	2	2	0	0	0	0	0	0	0	0	0	4	2	2	3	k__Bacteria	p__Acidobacteria	c__Acidobacteria-6	o__iii1-15	f__unidentified_iii1-15	g__unidentified_iii1-15	s__unidentified_iii1-15	361264
OTU20166	2	0	15	0	0	0	0	0	0	0	0	0	1	0	3	0	0	0	24	12	0	0	0	0	0	0	0	0	0	0	0	0	0	0	0	0	k__Bacteria	p__Acidobacteria	c__Acidobacteria-6	o__iii1-15	f__unidentified_iii1-15	g__unidentified_iii1-15	s__unidentified_iii1-15	New.CleanUp.ReferenceOTU47272
OTU3739	4	3	5	0	0	0	0	2	1	0	0	1	3	5	1	2	0	0	19	7	2	0	0	1	0	0	0	0	0	0	0	0	0	0	0	0	k__Bacteria	p__Acidobacteria	c__Acidobacteria-6	o__iii1-15	f__unidentified_iii1-15	g__unidentified_iii1-15	s__unidentified_iii1-15	508833
OTU5473	3	0	0	0	0	0	0	0	1	0	0	0	0	14	7	13	0	0	0	0	0	0	0	18	0	0	0	0	0	0	0	0	0	0	0	0	k__Bacteria	p__Acidobacteria	c__Acidobacteria-6	o__iii1-15	f__unidentified_iii1-15	g__unidentified_iii1-15	s__unidentified_iii1-15	1119329
OTU9327	0	0	1	0	1	9	19	1	0	0	0	3	5	1	0	0	0	7	1	3	0	0	0	0	0	0	1	0	0	0	0	3	0	0	0	1	k__Bacteria	p__Acidobacteria	c__Acidobacteria-6	o__iii1-15	f__unidentified_iii1-15	g__unidentified_iii1-15	s__unidentified_iii1-15	350966
OTU10971	4	0	0	0	0	0	0	0	0	0	0	0	1	1	0	8	0	0	0	0	1	0	0	40	0	0	0	0	0	0	0	0	0	0	0	0	k__Bacteria	p__Acidobacteria	c__Acidobacteria-6	o__iii1-15	f__unidentified_iii1-15	g__unidentified_iii1-15	s__unidentified_iii1-15	538113
OTU2711	1	3	4	0	0	3	0	5	0	0	1	0	3	7	4	1	3	2	3	3	7	0	1	2	0	0	0	0	0	0	0	0	1	0	0	0	k__Bacteria	p__Acidobacteria	c__Acidobacteria-6	o__iii1-15	f__unidentified_iii1-15	g__unidentified_iii1-15	s__unidentified_iii1-15	4468097
OTU37704	0	0	0	1	0	0	0	0	0	0	0	0	3	1	1	0	0	2	4	15	19	5	2	0	0	0	0	0	0	0	0	0	0	0	1	0	k__Bacteria	p__Acidobacteria	c__Acidobacteria-6	o__iii1-15	f__unidentified_iii1-15	g__unidentified_iii1-15	s__unidentified_iii1-15	New.CleanUp.ReferenceOTU161221
OTU2824	0	0	1	3	1	0	1	4	2	0	3	1	4	0	0	1	3	0	7	5	2	2	2	0	0	0	0	0	0	0	0	0	2	2	7	0	k__Bacteria	p__Acidobacteria	c__Acidobacteria-6	o__iii1-15	f__unidentified_iii1-15	g__unidentified_iii1-15	s__unidentified_iii1-15	708420
OTU10577	6	12	3	1	0	0	0	0	0	0	0	20	2	2	3	1	0	0	0	2	1	0	0	0	0	0	0	0	0	0	0	0	0	0	0	0	k__Bacteria	p__Acidobacteria	c__Acidobacteria-6	o__iii1-15	f__unidentified_iii1-15	g__unidentified_iii1-15	s__unidentified_iii1-15	892000
OTU4725	4	3	4	4	3	0	0	1	0	5	0	3	0	0	2	0	0	0	1	1	18	3	0	0	0	0	0	0	0	0	0	0	0	0	0	0	k__Bacteria	p__Acidobacteria	c__Acidobacteria-6	o__iii1-15	f__unidentified_iii1-15	g__unidentified_iii1-15	s__unidentified_iii1-15	2352981
OTU13528	0	0	2	0	0	0	0	0	9	10	7	5	4	0	0	0	4	0	7	1	0	0	0	0	0	0	0	0	0	0	0	0	1	0	0	0	k__Bacteria	p__Acidobacteria	c__Acidobacteria-6	o__iii1-15	f__unidentified_iii1-15	g__unidentified_iii1-15	s__unidentified_iii1-15	New.CleanUp.ReferenceOTU6798
OTU26560	1	2	1	2	2	0	0	0	0	1	1	5	7	0	12	0	0	0	11	1	2	1	0	1	0	0	0	0	0	0	0	0	0	0	0	0	k__Bacteria	p__Acidobacteria	c__Acidobacteria-6	o__iii1-15	f__unidentified_iii1-15	g__unidentified_iii1-15	s__unidentified_iii1-15	New.CleanUp.ReferenceOTU87967
OTU12748	14	3	1	0	0	0	0	0	0	0	0	3	2	13	4	3	0	0	0	3	0	0	0	3	0	0	0	0	0	0	0	0	0	0	0	0	k__Bacteria	p__Acidobacteria	c__Acidobacteria-6	o__iii1-15	f__unidentified_iii1-15	g__unidentified_iii1-15	s__unidentified_iii1-15	New.CleanUp.ReferenceOTU2054
OTU8362	10	10	1	0	0	0	0	0	0	0	0	1	1	3	6	3	0	0	0	4	0	0	0	7	0	1	0	0	0	0	0	0	0	0	0	0	k__Bacteria	p__Acidobacteria	c__Acidobacteria-6	o__iii1-15	f__unidentified_iii1-15	g__unidentified_iii1-15	s__unidentified_iii1-15	2880684
OTU62938	10	4	3	1	0	0	1	0	0	0	0	7	0	1	2	0	0	0	2	1	3	1	0	11	0	0	0	0	0	0	0	0	0	0	0	0	k__Bacteria	p__Acidobacteria	c__Acidobacteria-6	o__iii1-15	f__unidentified_iii1-15	g__unidentified_iii1-15	s__unidentified_iii1-15	New.CleanUp.ReferenceOTU317436
OTU11216	0	0	0	0	0	0	0	0	0	0	0	0	3	4	3	1	0	0	3	5	15	10	2	0	0	0	0	0	0	0	0	0	0	0	0	0	k__Bacteria	p__Acidobacteria	c__Acidobacteria-6	o__iii1-15	f__unidentified_iii1-15	g__unidentified_iii1-15	s__unidentified_iii1-15	827099
OTU1077	15	9	0	0	1	0	0	0	0	0	0	1	1	2	6	3	0	0	1	3	2	0	0	1	0	0	0	0	0	0	0	0	0	0	0	0	k__Bacteria	p__Acidobacteria	c__Acidobacteria-6	o__iii1-15	f__unidentified_iii1-15	g__unidentified_iii1-15	s__unidentified_iii1-15	1722703
OTU3935	3	2	3	3	1	0	0	0	3	2	0	4	2	1	3	0	3	1	7	1	4	0	0	2	0	0	0	0	0	0	0	0	0	0	0	0	k__Bacteria	p__Acidobacteria	c__Acidobacteria-6	o__iii1-15	f__unidentified_iii1-15	g__unidentified_iii1-15	s__unidentified_iii1-15	1554348
OTU39377	0	0	0	0	0	0	0	0	0	0	0	0	0	0	0	3	0	0	0	0	0	0	0	42	0	0	0	0	0	0	0	0	0	0	0	0	k__Bacteria	p__Acidobacteria	c__Acidobacteria-6	o__iii1-15	f__unidentified_iii1-15	g__unidentified_iii1-15	s__unidentified_iii1-15	New.CleanUp.ReferenceOTU172257
OTU3194	0	0	3	2	0	0	1	2	1	1	0	0	2	0	1	1	2	0	6	5	7	5	1	0	0	0	0	0	0	0	0	0	0	0	0	0	k__Bacteria	p__Acidobacteria	c__Acidobacteria-6	o__iii1-15	f__unidentified_iii1-15	g__unidentified_iii1-15	s__unidentified_iii1-15	636630
OTU8704	1	1	3	3	3	0	4	4	0	0	0	2	2	3	1	0	0	1	2	1	4	0	0	2	0	0	0	0	0	0	0	0	0	1	0	0	k__Bacteria	p__Acidobacteria	c__Acidobacteria-6	o__iii1-15	f__unidentified_iii1-15	g__unidentified_iii1-15	s__unidentified_iii1-15	707755
OTU9758	0	1	0	0	0	0	0	0	0	2	1	1	5	1	0	0	8	0	7	2	2	1	1	0	0	0	0	0	0	0	0	0	2	1	0	1	k__Bacteria	p__Acidobacteria	c__Acidobacteria-6	o__iii1-15	f__unidentified_iii1-15	g__unidentified_iii1-15	s__unidentified_iii1-15	562438
OTU15421	0	0	0	0	3	0	0	0	1	0	0	7	1	0	0	0	0	0	0	2	19	1	2	0	0	0	0	0	0	0	0	0	0	0	0	0	k__Bacteria	p__Acidobacteria	c__Acidobacteria-6	o__iii1-15	f__unidentified_iii1-15	g__unidentified_iii1-15	s__unidentified_iii1-15	New.CleanUp.ReferenceOTU18269
OTU8290	1	2	3	1	0	0	0	1	0	0	1	1	2	2	5	3	4	0	6	1	1	0	0	1	0	0	0	0	0	0	0	0	0	0	0	0	k__Bacteria	p__Acidobacteria	c__Acidobacteria-6	o__iii1-15	f__unidentified_iii1-15	g__unidentified_iii1-15	s__unidentified_iii1-15	4463629
OTU41893	0	0	4	2	0	0	1	2	4	2	3	1	5	0	3	0	2	0	3	2	1	0	0	0	0	0	0	0	0	0	0	0	0	0	0	0	k__Bacteria	p__Acidobacteria	c__Acidobacteria-6	o__iii1-15	f__unidentified_iii1-15	g__unidentified_iii1-15	s__unidentified_iii1-15	New.CleanUp.ReferenceOTU187054
OTU5660	1	1	2	2	0	0	3	1	0	1	0	5	3	2	0	2	0	3	1	0	2	0	0	3	0	0	0	0	0	0	0	0	0	0	2	0	k__Bacteria	p__Acidobacteria	c__Acidobacteria-6	o__iii1-15	f__unidentified_iii1-15	g__unidentified_iii1-15	s__unidentified_iii1-15	4434347
OTU10988	17	12	0	0	0	0	0	0	0	0	0	0	0	0	5	0	0	0	0	0	0	0	0	0	0	0	0	0	0	0	0	0	0	0	0	0	k__Bacteria	p__Acidobacteria	c__Acidobacteria-6	o__iii1-15	f__unidentified_iii1-15	g__unidentified_iii1-15	s__unidentified_iii1-15	113103
OTU56871	2	5	1	0	0	1	0	3	2	0	0	0	0	0	2	0	4	1	2	1	2	2	0	0	0	0	0	0	0	0	0	0	4	1	1	0	k__Bacteria	p__Acidobacteria	c__Acidobacteria-6	o__iii1-15	f__unidentified_iii1-15	g__unidentified_iii1-15	s__unidentified_iii1-15	New.CleanUp.ReferenceOTU279428
OTU63799	1	2	0	0	4	1	24	0	0	0	0	0	0	0	0	1	0	1	0	0	0	0	0	0	0	0	0	0	0	0	0	0	0	0	0	0	k__Bacteria	p__Acidobacteria	c__Acidobacteria-6	o__iii1-15	f__unidentified_iii1-15	g__unidentified_iii1-15	s__unidentified_iii1-15	New.CleanUp.ReferenceOTU322783
OTU8663	12	1	0	0	0	0	0	0	0	0	0	0	0	6	2	5	0	0	0	0	0	0	0	7	0	0	0	0	0	0	0	0	0	0	0	0	k__Bacteria	p__Acidobacteria	c__Acidobacteria-6	o__iii1-15	f__unidentified_iii1-15	g__unidentified_iii1-15	s__unidentified_iii1-15	4404012
OTU912	4	1	0	0	0	0	0	0	0	0	4	0	0	1	0	0	4	0	2	2	0	0	0	8	0	0	0	0	0	0	0	0	0	4	0	1	k__Bacteria	p__Acidobacteria	c__Acidobacteria-6	o__iii1-15	f__unidentified_iii1-15	g__unidentified_iii1-15	s__unidentified_iii1-15	1146180
OTU2019	3	1	1	0	2	0	1	0	0	0	0	1	3	5	2	0	0	0	3	2	1	1	0	5	0	0	0	0	0	0	0	0	0	0	0	0	k__Bacteria	p__Acidobacteria	c__Acidobacteria-6	o__iii1-15	f__unidentified_iii1-15	g__unidentified_iii1-15	s__unidentified_iii1-15	219034
OTU5619	0	0	0	0	1	4	1	0	0	0	0	0	0	0	0	0	0	1	0	0	0	0	0	0	2	2	2	2	0	4	0	10	2	0	0	0	k__Bacteria	p__Acidobacteria	c__Acidobacteria-6	o__iii1-15	f__unidentified_iii1-15	g__unidentified_iii1-15	s__unidentified_iii1-15	4476059
OTU309	5	0	2	0	0	0	0	0	0	1	3	1	0	0	1	1	0	0	0	0	0	0	0	16	0	0	0	0	0	0	0	0	0	0	0	0	k__Bacteria	p__Acidobacteria	c__Acidobacteria-6	o__iii1-15	f__unidentified_iii1-15	g__unidentified_iii1-15	s__unidentified_iii1-15	4409930
OTU11595	5	2	3	0	0	0	0	0	0	0	0	0	1	3	0	0	0	0	3	5	0	0	0	8	0	0	0	0	0	0	0	0	0	0	0	0	k__Bacteria	p__Acidobacteria	c__Acidobacteria-6	o__iii1-15	f__unidentified_iii1-15	g__unidentified_iii1-15	s__unidentified_iii1-15	New.ReferenceOTU422
OTU16816	10	2	0	0	0	0	0	0	0	0	0	0	1	1	1	4	0	0	0	0	0	0	0	11	0	0	0	0	0	0	0	0	0	0	0	0	k__Bacteria	p__Acidobacteria	c__Acidobacteria-6	o__iii1-15	f__unidentified_iii1-15	g__unidentified_iii1-15	s__unidentified_iii1-15	New.CleanUp.ReferenceOTU26717
OTU34290	0	0	3	3	0	0	0	4	0	0	0	0	1	1	2	0	0	0	0	3	5	4	4	0	0	0	0	0	0	0	0	0	0	0	0	0	k__Bacteria	p__Acidobacteria	c__Acidobacteria-6	o__iii1-15	f__unidentified_iii1-15	g__unidentified_iii1-15	s__unidentified_iii1-15	New.CleanUp.ReferenceOTU138663
OTU35128	5	2	0	0	0	0	0	0	0	0	0	0	1	8	9	1	0	0	0	0	0	0	0	4	0	0	0	0	0	0	0	0	0	0	0	0	k__Bacteria	p__Acidobacteria	c__Acidobacteria-6	o__iii1-15	f__unidentified_iii1-15	g__unidentified_iii1-15	s__unidentified_iii1-15	New.CleanUp.ReferenceOTU143992
OTU5901	0	0	1	1	0	7	2	5	6	1	0	0	1	0	0	0	2	2	0	1	0	0	0	0	0	0	0	0	0	0	0	0	0	0	0	0	k__Bacteria	p__Acidobacteria	c__Acidobacteria-6	o__iii1-15	f__unidentified_iii1-15	g__unidentified_iii1-15	s__unidentified_iii1-15	4439454
OTU10492	3	2	4	0	0	0	1	0	0	0	0	3	3	6	1	3	0	0	1	1	0	1	0	0	0	0	0	0	0	0	0	0	0	0	0	0	k__Bacteria	p__Acidobacteria	c__Acidobacteria-6	o__iii1-15	f__unidentified_iii1-15	g__unidentified_iii1-15	s__unidentified_iii1-15	2121893
OTU2761	0	0	1	0	0	0	0	1	0	1	4	0	1	0	1	0	10	0	0	1	2	0	0	0	0	0	0	0	0	0	0	0	3	0	0	2	k__Bacteria	p__Acidobacteria	c__Acidobacteria-6	o__iii1-15	f__unidentified_iii1-15	g__unidentified_iii1-15	s__unidentified_iii1-15	697361
OTU3799	3	0	1	0	0	0	0	2	0	0	0	0	1	4	6	0	0	0	2	5	2	0	0	1	0	0	0	0	0	0	0	0	0	0	0	0	k__Bacteria	p__Acidobacteria	c__Acidobacteria-6	o__iii1-15	f__unidentified_iii1-15	g__unidentified_iii1-15	s__unidentified_iii1-15	89580
OTU8204	0	0	0	0	0	0	0	0	0	0	0	0	0	5	1	2	0	0	0	0	0	0	0	19	0	0	0	0	0	0	0	0	0	0	0	0	k__Bacteria	p__Acidobacteria	c__Acidobacteria-6	o__iii1-15	f__unidentified_iii1-15	g__unidentified_iii1-15	s__unidentified_iii1-15	4097102
OTU10060	0	2	5	0	0	0	1	1	0	0	3	1	1	0	3	2	1	1	2	1	0	1	0	2	0	0	0	0	0	0	0	0	0	0	0	0	k__Bacteria	p__Acidobacteria	c__Acidobacteria-6	o__iii1-15	f__unidentified_iii1-15	g__unidentified_iii1-15	s__unidentified_iii1-15	741384
OTU16587	1	0	0	0	0	0	0	0	0	0	0	0	0	1	0	2	1	0	1	0	0	0	0	21	0	0	0	0	0	0	0	0	0	0	0	0	k__Bacteria	p__Acidobacteria	c__Acidobacteria-6	o__iii1-15	f__unidentified_iii1-15	g__unidentified_iii1-15	s__unidentified_iii1-15	New.CleanUp.ReferenceOTU25231
OTU21354	0	0	1	0	0	0	0	0	0	0	0	0	0	0	0	0	0	0	14	8	1	2	0	0	0	0	0	0	0	0	0	0	0	0	0	0	k__Bacteria	p__Acidobacteria	c__Acidobacteria-6	o__iii1-15	f__unidentified_iii1-15	g__unidentified_iii1-15	s__unidentified_iii1-15	New.CleanUp.ReferenceOTU54626
OTU25715	0	0	2	1	0	0	0	0	6	3	1	1	0	0	0	0	0	0	1	1	6	4	0	0	0	0	0	0	0	0	0	0	0	0	0	0	k__Bacteria	p__Acidobacteria	c__Acidobacteria-6	o__iii1-15	f__unidentified_iii1-15	g__unidentified_iii1-15	s__unidentified_iii1-15	New.CleanUp.ReferenceOTU82489
OTU5226	4	1	0	0	0	0	0	0	0	0	0	0	0	0	0	12	0	0	0	0	0	0	0	8	0	0	0	0	0	0	0	0	0	0	0	0	k__Bacteria	p__Acidobacteria	c__Acidobacteria-6	o__iii1-15	f__unidentified_iii1-15	g__unidentified_iii1-15	s__unidentified_iii1-15	2426359
OTU8306	3	0	2	0	0	0	0	0	0	0	0	2	0	2	4	4	0	0	1	0	0	0	0	7	0	0	0	0	0	0	0	0	0	0	0	0	k__Bacteria	p__Acidobacteria	c__Acidobacteria-6	o__iii1-15	f__unidentified_iii1-15	g__unidentified_iii1-15	s__unidentified_iii1-15	113209
OTU3521	6	0	0	0	0	0	0	0	0	0	0	0	0	5	0	6	0	0	0	0	0	0	0	7	0	0	0	0	0	0	0	0	0	0	0	0	k__Bacteria	p__Acidobacteria	c__Acidobacteria-6	o__iii1-15	f__unidentified_iii1-15	g__unidentified_iii1-15	s__unidentified_iii1-15	2815113
OTU32530	3	1	2	0	0	0	0	0	0	0	0	0	0	0	2	0	0	0	6	5	0	0	0	0	0	0	0	0	0	0	0	0	1	0	2	2	k__Bacteria	p__Acidobacteria	c__Acidobacteria-6	o__iii1-15	f__unidentified_iii1-15	g__unidentified_iii1-15	s__unidentified_iii1-15	New.CleanUp.ReferenceOTU126888
OTU30086	0	0	0	0	0	0	1	4	1	0	0	1	1	0	0	0	1	0	6	0	1	3	2	1	0	0	0	0	0	0	0	0	0	0	1	0	k__Bacteria	p__Acidobacteria	c__Acidobacteria-6	o__iii1-15	f__unidentified_iii1-15	g__unidentified_iii1-15	s__unidentified_iii1-15	New.CleanUp.ReferenceOTU111147
OTU3630	0	0	0	0	0	0	0	0	0	0	0	0	0	0	0	18	0	0	0	0	0	0	0	4	0	0	0	0	0	0	0	0	0	0	0	0	k__Bacteria	p__Acidobacteria	c__Acidobacteria-6	o__iii1-15	f__unidentified_iii1-15	g__unidentified_iii1-15	s__unidentified_iii1-15	2088818
OTU4561	1	0	1	0	0	0	0	1	0	2	2	1	0	0	0	3	1	0	0	0	0	0	0	10	0	0	0	0	0	0	0	0	0	0	0	0	k__Bacteria	p__Acidobacteria	c__Acidobacteria-6	o__iii1-15	f__unidentified_iii1-15	g__unidentified_iii1-15	s__unidentified_iii1-15	4408165
OTU47745	4	5	0	0	0	0	0	0	0	0	0	0	0	3	3	1	0	0	0	0	0	0	0	6	0	0	0	0	0	0	0	0	0	0	0	0	k__Bacteria	p__Acidobacteria	c__Acidobacteria-6	o__iii1-15	f__unidentified_iii1-15	g__unidentified_iii1-15	s__unidentified_iii1-15	New.CleanUp.ReferenceOTU222428
OTU62106	0	0	3	2	0	0	1	2	1	0	2	5	0	0	0	0	0	1	2	0	2	0	1	0	0	0	0	0	0	0	0	0	0	0	0	0	k__Bacteria	p__Acidobacteria	c__Acidobacteria-6	o__iii1-15	f__unidentified_iii1-15	g__unidentified_iii1-15	s__unidentified_iii1-15	New.CleanUp.ReferenceOTU312231
OTU1597	10	2	0	0	0	0	0	0	0	0	0	0	0	0	0	0	0	0	9	0	0	0	0	0	0	0	0	0	0	0	0	0	0	0	0	0	k__Bacteria	p__Acidobacteria	c__Acidobacteria-6	o__iii1-15	f__unidentified_iii1-15	g__unidentified_iii1-15	s__unidentified_iii1-15	4464809
OTU1785	0	0	0	1	0	0	1	0	2	3	4	4	0	0	0	0	1	0	0	0	0	0	1	0	0	0	0	0	0	0	0	0	0	1	2	1	k__Bacteria	p__Acidobacteria	c__Acidobacteria-6	o__iii1-15	f__unidentified_iii1-15	g__unidentified_iii1-15	s__unidentified_iii1-15	627091
OTU11535	1	0	1	0	0	0	1	0	0	0	0	1	0	0	8	0	0	0	1	4	0	0	0	4	0	0	0	0	0	0	0	0	0	0	0	0	k__Bacteria	p__Acidobacteria	c__Acidobacteria-6	o__iii1-15	f__unidentified_iii1-15	g__unidentified_iii1-15	s__unidentified_iii1-15	New.ReferenceOTU1150
OTU33870	0	0	0	0	0	0	0	0	0	0	1	5	5	0	0	0	0	0	3	1	5	1	0	0	0	0	0	0	0	0	0	0	0	0	0	0	k__Bacteria	p__Acidobacteria	c__Acidobacteria-6	o__iii1-15	f__unidentified_iii1-15	g__unidentified_iii1-15	s__unidentified_iii1-15	New.CleanUp.ReferenceOTU135789
OTU49742	2	0	0	0	0	0	0	0	0	0	0	0	0	2	0	7	0	0	0	0	0	0	0	10	0	0	0	0	0	0	0	0	0	0	0	0	k__Bacteria	p__Acidobacteria	c__Acidobacteria-6	o__iii1-15	f__unidentified_iii1-15	g__unidentified_iii1-15	s__unidentified_iii1-15	New.CleanUp.ReferenceOTU234683
OTU57743	3	8	5	0	3	0	0	0	0	0	0	0	0	0	1	0	0	0	0	1	0	0	0	0	0	0	0	0	0	0	0	0	0	0	0	0	k__Bacteria	p__Acidobacteria	c__Acidobacteria-6	o__iii1-15	f__unidentified_iii1-15	g__unidentified_iii1-15	s__unidentified_iii1-15	New.CleanUp.ReferenceOTU284609
OTU66253	0	0	2	2	0	0	1	5	2	0	2	0	0	0	0	0	0	0	0	0	3	2	2	0	0	0	0	0	0	0	0	0	0	0	0	0	k__Bacteria	p__Acidobacteria	c__Acidobacteria-6	o__iii1-15	f__unidentified_iii1-15	g__unidentified_iii1-15	s__unidentified_iii1-15	New.CleanUp.ReferenceOTU339249
OTU29255	1	0	0	2	0	0	2	1	3	0	0	0	1	0	0	0	2	0	1	1	0	0	3	0	0	0	0	0	0	0	0	0	1	0	1	1	k__Bacteria	p__Acidobacteria	c__Acidobacteria-6	o__iii1-15	f__unidentified_iii1-15	g__unidentified_iii1-15	s__unidentified_iii1-15	New.CleanUp.ReferenceOTU105784
OTU4176	4	1	1	0	0	0	0	0	0	0	0	1	1	2	3	0	0	0	0	0	0	0	0	2	0	0	0	0	0	2	0	1	0	0	1	0	k__Bacteria	p__Acidobacteria	c__Acidobacteria-6	o__iii1-15	f__unidentified_iii1-15	g__unidentified_iii1-15	s__unidentified_iii1-15	4428749
OTU8237	0	0	0	0	0	0	0	0	0	0	0	0	1	1	1	15	0	0	1	0	0	0	0	0	0	0	0	0	0	0	0	0	0	0	0	0	k__Bacteria	p__Acidobacteria	c__Acidobacteria-6	o__iii1-15	f__unidentified_iii1-15	g__unidentified_iii1-15	s__unidentified_iii1-15	215477
OTU43704	0	0	0	0	1	1	1	1	1	0	0	0	0	0	0	0	1	3	0	0	0	0	0	0	0	0	0	0	0	0	0	0	2	1	3	4	k__Bacteria	p__Acidobacteria	c__Acidobacteria-6	o__iii1-15	f__unidentified_iii1-15	g__unidentified_iii1-15	s__unidentified_iii1-15	New.CleanUp.ReferenceOTU197489
OTU45563	3	1	2	0	0	0	0	0	0	0	0	1	0	6	2	0	0	0	0	0	0	0	0	4	0	0	0	0	0	0	0	0	0	0	0	0	k__Bacteria	p__Acidobacteria	c__Acidobacteria-6	o__iii1-15	f__unidentified_iii1-15	g__unidentified_iii1-15	s__unidentified_iii1-15	New.CleanUp.ReferenceOTU209333
OTU36463	0	0	1	0	0	0	0	0	0	0	0	1	0	0	0	0	0	0	0	0	0	0	0	16	0	0	0	0	0	0	0	0	0	0	0	0	k__Bacteria	p__Acidobacteria	c__Acidobacteria-6	o__iii1-15	f__unidentified_iii1-15	g__unidentified_iii1-15	s__unidentified_iii1-15	New.CleanUp.ReferenceOTU152865
OTU56963	0	0	5	1	0	3	1	0	0	0	0	3	1	0	1	1	1	1	0	0	0	0	0	0	0	0	0	0	0	0	0	0	0	0	0	0	k__Bacteria	p__Acidobacteria	c__Acidobacteria-6	o__iii1-15	f__unidentified_iii1-15	g__unidentified_iii1-15	s__unidentified_iii1-15	New.CleanUp.ReferenceOTU279926
OTU4304	3	0	0	0	0	0	0	0	0	0	0	0	0	1	7	5	0	0	0	0	0	0	0	1	0	0	0	0	0	0	0	0	0	0	0	0	k__Bacteria	p__Acidobacteria	c__Acidobacteria-6	o__iii1-15	f__unidentified_iii1-15	g__unidentified_iii1-15	s__unidentified_iii1-15	4402382
OTU5390	4	0	0	0	0	0	0	0	0	0	0	0	0	0	0	8	0	0	0	0	0	0	0	5	0	0	0	0	0	0	0	0	0	0	0	0	k__Bacteria	p__Acidobacteria	c__Acidobacteria-6	o__iii1-15	f__unidentified_iii1-15	g__unidentified_iii1-15	s__unidentified_iii1-15	246466
OTU10566	2	0	0	1	0	0	1	0	0	0	0	4	1	1	1	0	0	0	2	0	1	2	0	0	0	0	0	0	0	0	0	0	1	0	0	0	k__Bacteria	p__Acidobacteria	c__Acidobacteria-6	o__iii1-15	f__unidentified_iii1-15	g__unidentified_iii1-15	s__unidentified_iii1-15	1130197
OTU12151	0	1	0	0	1	2	4	0	0	0	0	0	1	0	0	0	0	1	0	0	0	0	0	0	0	2	1	0	1	2	0	0	0	0	1	0	k__Bacteria	p__Acidobacteria	c__Acidobacteria-6	o__iii1-15	f__unidentified_iii1-15	g__unidentified_iii1-15	s__unidentified_iii1-15	New.ReferenceOTU877
OTU67580	9	1	0	0	0	0	0	0	0	0	0	0	1	3	3	0	0	0	0	0	0	0	0	0	0	0	0	0	0	0	0	0	0	0	0	0	k__Bacteria	p__Acidobacteria	c__Acidobacteria-6	o__iii1-15	f__unidentified_iii1-15	g__unidentified_iii1-15	s__unidentified_iii1-15	New.CleanUp.ReferenceOTU347946
OTU1435	8	1	2	0	0	0	0	0	0	0	0	0	0	4	0	1	0	0	0	0	0	0	0	0	0	0	0	0	0	0	0	0	0	0	0	0	k__Bacteria	p__Acidobacteria	c__Acidobacteria-6	o__iii1-15	f__unidentified_iii1-15	g__unidentified_iii1-15	s__unidentified_iii1-15	3952124
OTU2557	1	3	1	0	2	0	0	0	0	0	0	3	0	2	0	0	2	0	0	2	0	0	0	0	0	0	0	0	0	0	0	0	0	0	0	0	k__Bacteria	p__Acidobacteria	c__Acidobacteria-6	o__iii1-15	f__unidentified_iii1-15	g__unidentified_iii1-15	s__unidentified_iii1-15	704614
OTU5952	0	0	2	0	0	0	0	0	0	0	0	0	0	2	2	2	0	0	1	5	1	0	0	1	0	0	0	0	0	0	0	0	0	0	0	0	k__Bacteria	p__Acidobacteria	c__Acidobacteria-6	o__iii1-15	f__unidentified_iii1-15	g__unidentified_iii1-15	s__unidentified_iii1-15	104490
OTU67581	0	2	3	0	3	0	0	1	0	0	0	1	0	0	1	0	0	0	0	0	2	0	0	2	0	0	0	0	0	0	0	0	1	0	0	0	k__Bacteria	p__Acidobacteria	c__Acidobacteria-6	o__iii1-15	f__unidentified_iii1-15	g__unidentified_iii1-15	s__unidentified_iii1-15	New.CleanUp.ReferenceOTU347948
OTU5533	1	0	1	0	0	0	0	0	0	0	1	1	2	0	0	0	3	0	0	0	0	2	0	0	0	0	0	0	0	0	0	1	1	1	1	0	k__Bacteria	p__Acidobacteria	c__Acidobacteria-6	o__iii1-15	f__unidentified_iii1-15	g__unidentified_iii1-15	s__unidentified_iii1-15	1146157
OTU20268	3	1	0	0	0	0	0	0	0	0	0	0	0	0	3	0	0	0	8	0	0	0	0	0	0	0	0	0	0	0	0	0	0	0	0	0	k__Bacteria	p__Acidobacteria	c__Acidobacteria-6	o__iii1-15	f__unidentified_iii1-15	g__unidentified_iii1-15	s__unidentified_iii1-15	New.CleanUp.ReferenceOTU47975
OTU25774	2	8	0	0	0	0	0	0	0	0	0	0	1	0	0	1	0	0	0	1	2	0	0	0	0	0	0	0	0	0	0	0	0	0	0	0	k__Bacteria	p__Acidobacteria	c__Acidobacteria-6	o__iii1-15	f__unidentified_iii1-15	g__unidentified_iii1-15	s__unidentified_iii1-15	New.CleanUp.ReferenceOTU82836
OTU66145	1	1	1	0	0	0	0	0	0	0	0	0	0	3	0	3	0	0	0	0	0	0	0	6	0	0	0	0	0	0	0	0	0	0	0	0	k__Bacteria	p__Acidobacteria	c__Acidobacteria-6	o__iii1-15	f__unidentified_iii1-15	g__unidentified_iii1-15	s__unidentified_iii1-15	New.CleanUp.ReferenceOTU338494
OTU4715	2	1	1	0	0	0	0	0	0	0	0	0	0	1	3	0	0	0	1	1	1	0	0	3	0	0	0	0	0	0	0	0	0	0	0	0	k__Bacteria	p__Acidobacteria	c__Acidobacteria-6	o__iii1-15	f__unidentified_iii1-15	g__unidentified_iii1-15	s__unidentified_iii1-15	4318789
OTU4724	0	0	2	0	0	0	0	0	0	0	0	0	1	1	0	0	0	0	2	2	3	0	0	0	0	2	0	0	0	0	0	0	0	0	1	0	k__Bacteria	p__Acidobacteria	c__Acidobacteria-6	o__iii1-15	f__unidentified_iii1-15	g__unidentified_iii1-15	s__unidentified_iii1-15	715700
OTU5939	4	0	0	0	0	0	0	0	0	0	0	1	1	2	2	1	0	0	0	0	0	0	0	3	0	0	0	0	0	0	0	0	0	0	0	0	k__Bacteria	p__Acidobacteria	c__Acidobacteria-6	o__iii1-15	f__unidentified_iii1-15	g__unidentified_iii1-15	s__unidentified_iii1-15	1051693
OTU8813	0	0	4	0	0	0	0	0	0	0	1	0	0	0	0	2	0	0	0	0	1	4	0	2	0	0	0	0	0	0	0	0	0	0	0	0	k__Bacteria	p__Acidobacteria	c__Acidobacteria-6	o__iii1-15	f__unidentified_iii1-15	g__unidentified_iii1-15	s__unidentified_iii1-15	815264
OTU9135	2	1	3	0	0	0	0	0	0	0	0	0	3	2	0	0	2	0	0	0	0	0	0	0	0	0	1	0	0	0	0	0	0	0	0	0	k__Bacteria	p__Acidobacteria	c__Acidobacteria-6	o__iii1-15	f__unidentified_iii1-15	g__unidentified_iii1-15	s__unidentified_iii1-15	657034
OTU9921	0	1	0	0	0	0	0	0	0	0	0	0	0	1	0	8	0	0	0	0	0	0	0	4	0	0	0	0	0	0	0	0	0	0	0	0	k__Bacteria	p__Acidobacteria	c__Acidobacteria-6	o__iii1-15	f__unidentified_iii1-15	g__unidentified_iii1-15	s__unidentified_iii1-15	1554351
OTU10745	0	0	0	0	0	0	0	0	0	0	0	1	0	0	0	9	0	0	0	0	2	0	0	2	0	0	0	0	0	0	0	0	0	0	0	0	k__Bacteria	p__Acidobacteria	c__Acidobacteria-6	o__iii1-15	f__unidentified_iii1-15	g__unidentified_iii1-15	s__unidentified_iii1-15	4312368
OTU30311	0	0	0	0	1	0	0	0	0	0	0	0	2	0	1	0	2	1	0	2	5	0	0	0	0	0	0	0	0	0	0	0	0	0	0	0	k__Bacteria	p__Acidobacteria	c__Acidobacteria-6	o__iii1-15	f__unidentified_iii1-15	g__unidentified_iii1-15	s__unidentified_iii1-15	New.CleanUp.ReferenceOTU112571
OTU39736	2	1	1	1	0	0	0	0	0	0	0	0	0	4	0	0	0	0	3	0	2	0	0	0	0	0	0	0	0	0	0	0	0	0	0	0	k__Bacteria	p__Acidobacteria	c__Acidobacteria-6	o__iii1-15	f__unidentified_iii1-15	g__unidentified_iii1-15	s__unidentified_iii1-15	New.CleanUp.ReferenceOTU174550
OTU12346	3	2	2	0	0	0	0	0	0	0	0	1	0	3	0	2	0	0	0	0	0	0	0	0	0	0	0	0	0	0	0	0	0	0	0	0	k__Bacteria	p__Acidobacteria	c__Acidobacteria-6	o__iii1-15	f__unidentified_iii1-15	g__unidentified_iii1-15	s__unidentified_iii1-15	New.ReferenceOTU643
OTU53317	1	1	2	0	0	0	1	0	0	0	0	0	0	0	2	0	2	2	0	2	0	0	0	0	0	0	0	0	0	0	0	0	0	0	0	0	k__Bacteria	p__Acidobacteria	c__Acidobacteria-6	o__iii1-15	f__unidentified_iii1-15	g__unidentified_iii1-15	s__unidentified_iii1-15	New.CleanUp.ReferenceOTU256743
OTU65193	0	0	0	1	0	0	0	0	0	0	1	0	2	0	0	0	1	0	5	0	0	3	0	0	0	0	0	0	0	0	0	0	0	0	0	0	k__Bacteria	p__Acidobacteria	c__Acidobacteria-6	o__iii1-15	f__unidentified_iii1-15	g__unidentified_iii1-15	s__unidentified_iii1-15	New.CleanUp.ReferenceOTU332180
OTU5880	0	0	0	0	0	0	0	0	0	0	0	0	0	0	2	6	0	0	0	0	0	0	0	4	0	0	0	0	0	0	0	0	0	0	0	0	k__Bacteria	p__Acidobacteria	c__Acidobacteria-6	o__iii1-15	f__unidentified_iii1-15	g__unidentified_iii1-15	s__unidentified_iii1-15	4377841
OTU8965	0	0	0	0	0	0	0	0	0	0	0	0	0	1	3	1	0	0	0	0	0	0	0	7	0	0	0	0	0	0	0	0	0	0	0	0	k__Bacteria	p__Acidobacteria	c__Acidobacteria-6	o__iii1-15	f__unidentified_iii1-15	g__unidentified_iii1-15	s__unidentified_iii1-15	562471
OTU31001	0	0	0	0	0	0	0	0	0	0	0	0	0	0	0	0	0	0	0	1	6	5	0	0	0	0	0	0	0	0	0	0	0	0	0	0	k__Bacteria	p__Acidobacteria	c__Acidobacteria-6	o__iii1-15	f__unidentified_iii1-15	g__unidentified_iii1-15	s__unidentified_iii1-15	New.CleanUp.ReferenceOTU116650
OTU37838	1	0	2	1	0	0	1	0	0	0	0	1	0	0	3	3	0	0	0	0	0	0	0	0	0	0	0	0	0	0	0	0	0	0	0	0	k__Bacteria	p__Acidobacteria	c__Acidobacteria-6	o__iii1-15	f__unidentified_iii1-15	g__unidentified_iii1-15	s__unidentified_iii1-15	New.CleanUp.ReferenceOTU162032
OTU38184	2	2	0	0	0	0	0	0	0	0	0	0	0	2	3	2	0	0	0	0	0	0	0	1	0	0	0	0	0	0	0	0	0	0	0	0	k__Bacteria	p__Acidobacteria	c__Acidobacteria-6	o__iii1-15	f__unidentified_iii1-15	g__unidentified_iii1-15	s__unidentified_iii1-15	New.CleanUp.ReferenceOTU164366
OTU41470	0	0	3	0	0	0	1	1	1	1	0	0	0	0	0	0	0	0	2	1	1	0	1	0	0	0	0	0	0	0	0	0	0	0	0	0	k__Bacteria	p__Acidobacteria	c__Acidobacteria-6	o__iii1-15	f__unidentified_iii1-15	g__unidentified_iii1-15	s__unidentified_iii1-15	New.CleanUp.ReferenceOTU184529
OTU50010	0	0	0	0	0	0	2	2	0	0	0	0	1	0	0	0	1	3	1	0	0	0	0	0	0	2	0	0	0	0	0	0	0	0	0	0	k__Bacteria	p__Acidobacteria	c__Acidobacteria-6	o__iii1-15	f__unidentified_iii1-15	g__unidentified_iii1-15	s__unidentified_iii1-15	New.CleanUp.ReferenceOTU236509
OTU50949	5	4	0	1	0	0	0	0	1	0	0	0	0	1	0	0	0	0	0	0	0	0	0	0	0	0	0	0	0	0	0	0	0	0	0	0	k__Bacteria	p__Acidobacteria	c__Acidobacteria-6	o__iii1-15	f__unidentified_iii1-15	g__unidentified_iii1-15	s__unidentified_iii1-15	New.CleanUp.ReferenceOTU242231
OTU6836	0	1	1	0	0	0	0	0	0	0	0	0	0	0	2	7	0	0	0	0	0	0	0	0	0	0	0	0	0	0	0	0	0	0	0	0	k__Bacteria	p__Acidobacteria	c__Acidobacteria-6	o__iii1-15	f__unidentified_iii1-15	g__unidentified_iii1-15	s__unidentified_iii1-15	153308
OTU11106	4	0	0	0	0	0	0	1	0	0	1	0	1	1	0	0	0	0	0	1	0	1	0	0	0	0	0	0	0	0	0	0	0	1	0	0	k__Bacteria	p__Acidobacteria	c__Acidobacteria-6	o__iii1-15	f__unidentified_iii1-15	g__unidentified_iii1-15	s__unidentified_iii1-15	625475
OTU13837	3	7	0	0	0	0	0	0	0	0	0	0	0	1	0	0	0	0	0	0	0	0	0	0	0	0	0	0	0	0	0	0	0	0	0	0	k__Bacteria	p__Acidobacteria	c__Acidobacteria-6	o__iii1-15	f__unidentified_iii1-15	g__unidentified_iii1-15	s__unidentified_iii1-15	New.CleanUp.ReferenceOTU8690
OTU19555	4	0	0	0	0	0	0	0	0	0	0	0	0	4	1	2	0	0	0	0	0	0	0	0	0	0	0	0	0	0	0	0	0	0	0	0	k__Bacteria	p__Acidobacteria	c__Acidobacteria-6	o__iii1-15	f__unidentified_iii1-15	g__unidentified_iii1-15	s__unidentified_iii1-15	New.CleanUp.ReferenceOTU43505
OTU26819	0	1	0	1	0	0	0	2	0	1	0	0	1	0	1	0	0	0	1	0	1	2	0	0	0	0	0	0	0	0	0	0	0	0	0	0	k__Bacteria	p__Acidobacteria	c__Acidobacteria-6	o__iii1-15	f__unidentified_iii1-15	g__unidentified_iii1-15	s__unidentified_iii1-15	New.CleanUp.ReferenceOTU89574
OTU34470	0	2	1	0	0	0	0	0	0	0	0	2	0	0	0	0	0	0	4	2	0	0	0	0	0	0	0	0	0	0	0	0	0	0	0	0	k__Bacteria	p__Acidobacteria	c__Acidobacteria-6	o__iii1-15	f__unidentified_iii1-15	g__unidentified_iii1-15	s__unidentified_iii1-15	New.CleanUp.ReferenceOTU139851
OTU56468	2	0	1	0	0	0	0	0	0	0	0	0	1	2	0	0	0	0	3	2	0	0	0	0	0	0	0	0	0	0	0	0	0	0	0	0	k__Bacteria	p__Acidobacteria	c__Acidobacteria-6	o__iii1-15	f__unidentified_iii1-15	g__unidentified_iii1-15	s__unidentified_iii1-15	New.CleanUp.ReferenceOTU277013
OTU67346	1	0	0	0	0	0	2	2	0	0	0	1	1	0	0	0	0	1	0	0	0	0	2	0	0	0	0	0	0	0	0	0	0	0	1	0	k__Bacteria	p__Acidobacteria	c__Acidobacteria-6	o__iii1-15	f__unidentified_iii1-15	g__unidentified_iii1-15	s__unidentified_iii1-15	New.CleanUp.ReferenceOTU346307
OTU259	0	0	1	0	0	0	1	0	0	0	0	2	0	0	1	2	0	0	0	1	2	0	0	0	0	0	0	0	0	0	0	0	0	0	0	0	k__Bacteria	p__Acidobacteria	c__Acidobacteria-6	o__iii1-15	f__unidentified_iii1-15	g__unidentified_iii1-15	s__unidentified_iii1-15	3922904
OTU959	1	0	1	0	1	0	0	0	0	0	0	0	0	1	0	1	0	0	1	0	2	0	0	2	0	0	0	0	0	0	0	0	0	0	0	0	k__Bacteria	p__Acidobacteria	c__Acidobacteria-6	o__iii1-15	f__unidentified_iii1-15	g__unidentified_iii1-15	s__unidentified_iii1-15	587313
OTU2152	0	0	2	0	0	0	0	0	0	0	0	1	0	0	0	0	1	2	3	0	1	0	0	0	0	0	0	0	0	0	0	0	0	0	0	0	k__Bacteria	p__Acidobacteria	c__Acidobacteria-6	o__iii1-15	f__unidentified_iii1-15	g__unidentified_iii1-15	s__unidentified_iii1-15	3267604
OTU17144	4	0	0	0	0	0	0	0	0	0	0	0	0	1	1	2	0	0	0	0	0	0	0	2	0	0	0	0	0	0	0	0	0	0	0	0	k__Bacteria	p__Acidobacteria	c__Acidobacteria-6	o__iii1-15	f__unidentified_iii1-15	g__unidentified_iii1-15	s__unidentified_iii1-15	New.CleanUp.ReferenceOTU28781
OTU28311	3	0	0	0	0	0	0	0	0	0	0	0	0	2	1	1	0	0	0	0	0	0	0	3	0	0	0	0	0	0	0	0	0	0	0	0	k__Bacteria	p__Acidobacteria	c__Acidobacteria-6	o__iii1-15	f__unidentified_iii1-15	g__unidentified_iii1-15	s__unidentified_iii1-15	New.CleanUp.ReferenceOTU99452
OTU28781	0	1	1	1	0	0	0	0	0	0	0	0	1	0	0	0	2	3	0	1	0	0	0	0	0	0	0	0	0	0	0	0	0	0	0	0	k__Bacteria	p__Acidobacteria	c__Acidobacteria-6	o__iii1-15	f__unidentified_iii1-15	g__unidentified_iii1-15	s__unidentified_iii1-15	New.CleanUp.ReferenceOTU102477
OTU37473	0	0	0	0	0	0	0	0	0	0	0	0	0	0	0	0	0	0	0	0	0	0	0	0	0	0	0	0	0	0	0	0	4	5	0	1	k__Bacteria	p__Acidobacteria	c__Acidobacteria-6	o__iii1-15	f__unidentified_iii1-15	g__unidentified_iii1-15	s__unidentified_iii1-15	New.CleanUp.ReferenceOTU159530
OTU60293	2	0	0	0	0	0	0	0	0	0	0	0	0	0	3	2	0	0	0	0	0	0	0	3	0	0	0	0	0	0	0	0	0	0	0	0	k__Bacteria	p__Acidobacteria	c__Acidobacteria-6	o__iii1-15	f__unidentified_iii1-15	g__unidentified_iii1-15	s__unidentified_iii1-15	New.CleanUp.ReferenceOTU300562
OTU62948	0	0	0	0	0	0	0	1	0	0	0	0	0	0	0	0	1	0	0	0	0	0	4	0	0	0	0	0	0	0	0	0	3	0	0	1	k__Bacteria	p__Acidobacteria	c__Acidobacteria-6	o__iii1-15	f__unidentified_iii1-15	g__unidentified_iii1-15	s__unidentified_iii1-15	New.CleanUp.ReferenceOTU317514
OTU1112	0	0	0	0	0	0	0	0	0	0	0	0	0	1	0	3	0	0	0	0	0	0	0	5	0	0	0	0	0	0	0	0	0	0	0	0	k__Bacteria	p__Acidobacteria	c__Acidobacteria-6	o__iii1-15	f__unidentified_iii1-15	g__unidentified_iii1-15	s__unidentified_iii1-15	2918028
OTU1159	1	0	0	0	0	0	0	0	0	0	0	0	0	1	0	4	0	0	0	0	0	0	0	3	0	0	0	0	0	0	0	0	0	0	0	0	k__Bacteria	p__Acidobacteria	c__Acidobacteria-6	o__iii1-15	f__unidentified_iii1-15	g__unidentified_iii1-15	s__unidentified_iii1-15	578528
OTU9974	0	0	0	1	1	3	2	0	0	0	0	0	0	0	0	0	0	0	0	0	0	0	0	0	0	0	0	0	0	0	0	0	0	0	2	0	k__Bacteria	p__Acidobacteria	c__Acidobacteria-6	o__iii1-15	f__unidentified_iii1-15	g__unidentified_iii1-15	s__unidentified_iii1-15	242275
OTU10593	1	0	0	0	0	0	0	0	1	0	0	1	1	0	0	0	1	0	0	0	0	0	1	0	0	0	0	0	0	0	0	0	0	0	2	1	k__Bacteria	p__Acidobacteria	c__Acidobacteria-6	o__iii1-15	f__unidentified_iii1-15	g__unidentified_iii1-15	s__unidentified_iii1-15	3526330
OTU11273	1	1	0	0	0	0	0	0	0	0	0	0	4	0	0	0	0	0	0	0	1	0	0	2	0	0	0	0	0	0	0	0	0	0	0	0	k__Bacteria	p__Acidobacteria	c__Acidobacteria-6	o__iii1-15	f__unidentified_iii1-15	g__unidentified_iii1-15	s__unidentified_iii1-15	128094
OTU11770	0	0	0	0	0	0	0	0	0	0	0	0	0	0	0	0	0	5	2	0	0	1	0	0	0	1	0	0	0	0	0	0	0	0	0	0	k__Bacteria	p__Acidobacteria	c__Acidobacteria-6	o__iii1-15	f__unidentified_iii1-15	g__unidentified_iii1-15	s__unidentified_iii1-15	New.ReferenceOTU921
OTU22452	0	0	0	0	0	0	0	0	0	0	0	0	0	0	0	0	0	1	0	0	0	0	0	0	0	0	0	0	0	0	0	0	2	5	0	1	k__Bacteria	p__Acidobacteria	c__Acidobacteria-6	o__iii1-15	f__unidentified_iii1-15	g__unidentified_iii1-15	s__unidentified_iii1-15	New.CleanUp.ReferenceOTU61546
OTU30261	0	1	0	0	0	0	0	0	0	0	0	0	0	1	1	0	0	0	0	0	0	0	0	6	0	0	0	0	0	0	0	0	0	0	0	0	k__Bacteria	p__Acidobacteria	c__Acidobacteria-6	o__iii1-15	f__unidentified_iii1-15	g__unidentified_iii1-15	s__unidentified_iii1-15	New.CleanUp.ReferenceOTU112271
OTU48816	0	1	0	0	0	0	0	0	0	0	0	0	1	3	2	1	0	0	0	0	0	0	0	1	0	0	0	0	0	0	0	0	0	0	0	0	k__Bacteria	p__Acidobacteria	c__Acidobacteria-6	o__iii1-15	f__unidentified_iii1-15	g__unidentified_iii1-15	s__unidentified_iii1-15	New.CleanUp.ReferenceOTU229071
OTU53719	0	0	0	0	0	0	0	0	0	0	0	0	0	0	0	0	0	0	0	0	6	3	0	0	0	0	0	0	0	0	0	0	0	0	0	0	k__Bacteria	p__Acidobacteria	c__Acidobacteria-6	o__iii1-15	f__unidentified_iii1-15	g__unidentified_iii1-15	s__unidentified_iii1-15	New.CleanUp.ReferenceOTU259325
OTU54412	0	0	0	1	0	0	0	0	0	0	0	0	0	0	0	0	2	0	0	0	1	0	3	0	0	0	0	0	0	0	0	0	1	0	0	1	k__Bacteria	p__Acidobacteria	c__Acidobacteria-6	o__iii1-15	f__unidentified_iii1-15	g__unidentified_iii1-15	s__unidentified_iii1-15	New.CleanUp.ReferenceOTU263755
OTU64823	0	0	0	2	0	0	0	0	0	0	0	0	0	0	3	0	0	0	2	0	0	1	1	0	0	0	0	0	0	0	0	0	0	0	0	0	k__Bacteria	p__Acidobacteria	c__Acidobacteria-6	o__iii1-15	f__unidentified_iii1-15	g__unidentified_iii1-15	s__unidentified_iii1-15	New.CleanUp.ReferenceOTU329956
OTU966	0	0	0	0	0	0	0	0	0	0	0	0	0	0	0	8	0	0	0	0	0	0	0	0	0	0	0	0	0	0	0	0	0	0	0	0	k__Bacteria	p__Acidobacteria	c__Acidobacteria-6	o__iii1-15	f__unidentified_iii1-15	g__unidentified_iii1-15	s__unidentified_iii1-15	4402369
OTU4649	0	1	1	0	0	0	0	0	0	0	1	0	0	0	0	0	0	1	0	1	1	0	0	0	0	0	0	0	0	0	0	0	2	0	0	0	k__Bacteria	p__Acidobacteria	c__Acidobacteria-6	o__iii1-15	f__unidentified_iii1-15	g__unidentified_iii1-15	s__unidentified_iii1-15	1040827
OTU7071	0	1	2	0	0	0	0	0	0	0	0	0	0	1	2	0	0	0	0	0	1	0	0	1	0	0	0	0	0	0	0	0	0	0	0	0	k__Bacteria	p__Acidobacteria	c__Acidobacteria-6	o__iii1-15	f__unidentified_iii1-15	g__unidentified_iii1-15	s__unidentified_iii1-15	4458184
OTU11001	3	0	0	0	0	0	0	0	0	0	0	0	0	2	0	0	0	0	0	0	0	0	0	2	0	1	0	0	0	0	0	0	0	0	0	0	k__Bacteria	p__Acidobacteria	c__Acidobacteria-6	o__iii1-15	f__unidentified_iii1-15	g__unidentified_iii1-15	s__unidentified_iii1-15	4321226
OTU16208	0	0	0	1	0	0	0	0	0	2	0	1	0	0	0	0	0	0	1	3	0	0	0	0	0	0	0	0	0	0	0	0	0	0	0	0	k__Bacteria	p__Acidobacteria	c__Acidobacteria-6	o__iii1-15	f__unidentified_iii1-15	g__unidentified_iii1-15	s__unidentified_iii1-15	New.CleanUp.ReferenceOTU22932
OTU21722	0	0	1	0	0	0	0	0	0	0	0	0	0	2	1	0	0	0	0	3	1	0	0	0	0	0	0	0	0	0	0	0	0	0	0	0	k__Bacteria	p__Acidobacteria	c__Acidobacteria-6	o__iii1-15	f__unidentified_iii1-15	g__unidentified_iii1-15	s__unidentified_iii1-15	New.CleanUp.ReferenceOTU56888
OTU44516	0	0	0	0	0	0	0	0	0	0	0	1	1	0	0	1	0	0	1	1	1	2	0	0	0	0	0	0	0	0	0	0	0	0	0	0	k__Bacteria	p__Acidobacteria	c__Acidobacteria-6	o__iii1-15	f__unidentified_iii1-15	g__unidentified_iii1-15	s__unidentified_iii1-15	New.CleanUp.ReferenceOTU202475
OTU7557	1	0	0	0	0	0	0	0	0	0	0	0	0	1	1	0	0	0	2	0	0	0	0	2	0	0	0	0	0	0	0	0	0	0	0	0	k__Bacteria	p__Acidobacteria	c__Acidobacteria-6	o__iii1-15	f__unidentified_iii1-15	g__unidentified_iii1-15	s__unidentified_iii1-15	245895
OTU8190	2	0	0	0	0	0	0	0	0	0	0	0	2	2	0	1	0	0	0	0	0	0	0	0	0	0	0	0	0	0	0	0	0	0	0	0	k__Bacteria	p__Acidobacteria	c__Acidobacteria-6	o__iii1-15	f__unidentified_iii1-15	g__unidentified_iii1-15	s__unidentified_iii1-15	2598700
OTU8649	0	0	0	0	0	0	0	1	2	0	0	0	0	0	0	0	0	0	1	1	1	1	0	0	0	0	0	0	0	0	0	0	0	0	0	0	k__Bacteria	p__Acidobacteria	c__Acidobacteria-6	o__iii1-15	f__unidentified_iii1-15	g__unidentified_iii1-15	s__unidentified_iii1-15	100705
OTU13735	0	0	0	0	0	0	1	2	0	0	0	0	0	0	0	0	0	1	1	0	0	0	0	0	0	0	0	0	0	0	0	0	0	2	0	0	k__Bacteria	p__Acidobacteria	c__Acidobacteria-6	o__iii1-15	f__unidentified_iii1-15	g__unidentified_iii1-15	s__unidentified_iii1-15	New.CleanUp.ReferenceOTU8104
OTU16641	0	0	0	0	1	0	1	0	0	1	0	0	1	0	0	0	0	0	1	1	1	0	0	0	0	0	0	0	0	0	0	0	0	0	0	0	k__Bacteria	p__Acidobacteria	c__Acidobacteria-6	o__iii1-15	f__unidentified_iii1-15	g__unidentified_iii1-15	s__unidentified_iii1-15	New.CleanUp.ReferenceOTU25621
OTU22270	0	0	0	0	0	0	0	0	0	0	0	0	0	4	2	1	0	0	0	0	0	0	0	0	0	0	0	0	0	0	0	0	0	0	0	0	k__Bacteria	p__Acidobacteria	c__Acidobacteria-6	o__iii1-15	f__unidentified_iii1-15	g__unidentified_iii1-15	s__unidentified_iii1-15	New.CleanUp.ReferenceOTU60371
OTU29897	0	0	0	0	0	0	0	0	0	0	0	0	0	1	0	1	0	0	0	0	0	0	0	5	0	0	0	0	0	0	0	0	0	0	0	0	k__Bacteria	p__Acidobacteria	c__Acidobacteria-6	o__iii1-15	f__unidentified_iii1-15	g__unidentified_iii1-15	s__unidentified_iii1-15	New.CleanUp.ReferenceOTU109928
OTU34079	0	0	0	0	0	0	0	0	0	0	0	0	0	0	0	6	0	0	0	0	0	0	0	1	0	0	0	0	0	0	0	0	0	0	0	0	k__Bacteria	p__Acidobacteria	c__Acidobacteria-6	o__iii1-15	f__unidentified_iii1-15	g__unidentified_iii1-15	s__unidentified_iii1-15	New.CleanUp.ReferenceOTU137252
OTU34668	0	0	2	0	0	0	0	0	0	0	0	1	1	0	2	0	0	0	1	0	0	0	0	0	0	0	0	0	0	0	0	0	0	0	0	0	k__Bacteria	p__Acidobacteria	c__Acidobacteria-6	o__iii1-15	f__unidentified_iii1-15	g__unidentified_iii1-15	s__unidentified_iii1-15	New.CleanUp.ReferenceOTU141007
OTU41565	0	0	0	1	0	0	0	0	0	0	0	0	0	3	1	0	0	0	0	0	0	0	1	1	0	0	0	0	0	0	0	0	0	0	0	0	k__Bacteria	p__Acidobacteria	c__Acidobacteria-6	o__iii1-15	f__unidentified_iii1-15	g__unidentified_iii1-15	s__unidentified_iii1-15	New.CleanUp.ReferenceOTU185102
OTU45769	0	3	0	1	1	0	1	0	0	0	0	0	0	0	0	0	0	0	0	0	1	0	0	0	0	0	0	0	0	0	0	0	0	0	0	0	k__Bacteria	p__Acidobacteria	c__Acidobacteria-6	o__iii1-15	f__unidentified_iii1-15	g__unidentified_iii1-15	s__unidentified_iii1-15	New.CleanUp.ReferenceOTU210423
OTU46843	0	0	1	0	0	0	0	2	0	1	0	0	0	0	0	0	1	0	1	0	0	0	0	1	0	0	0	0	0	0	0	0	0	0	0	0	k__Bacteria	p__Acidobacteria	c__Acidobacteria-6	o__iii1-15	f__unidentified_iii1-15	g__unidentified_iii1-15	s__unidentified_iii1-15	New.CleanUp.ReferenceOTU216996
OTU53197	0	0	0	0	0	0	0	0	0	0	0	1	0	0	0	0	1	0	2	3	0	0	0	0	0	0	0	0	0	0	0	0	0	0	0	0	k__Bacteria	p__Acidobacteria	c__Acidobacteria-6	o__iii1-15	f__unidentified_iii1-15	g__unidentified_iii1-15	s__unidentified_iii1-15	New.CleanUp.ReferenceOTU255990
OTU60730	0	4	1	0	1	0	0	0	0	0	0	0	0	0	0	0	0	0	1	0	0	0	0	0	0	0	0	0	0	0	0	0	0	0	0	0	k__Bacteria	p__Acidobacteria	c__Acidobacteria-6	o__iii1-15	f__unidentified_iii1-15	g__unidentified_iii1-15	s__unidentified_iii1-15	New.CleanUp.ReferenceOTU303325
OTU64324	0	0	0	0	2	0	1	0	1	0	0	0	0	0	0	0	1	0	0	0	0	0	1	0	0	0	0	0	0	0	0	0	1	0	0	0	k__Bacteria	p__Acidobacteria	c__Acidobacteria-6	o__iii1-15	f__unidentified_iii1-15	g__unidentified_iii1-15	s__unidentified_iii1-15	New.CleanUp.ReferenceOTU326427
OTU734	0	1	1	0	0	0	0	1	0	0	0	0	0	0	0	0	2	0	0	0	0	0	0	1	0	0	0	0	0	0	0	0	0	0	0	0	k__Bacteria	p__Acidobacteria	c__Acidobacteria-6	o__iii1-15	f__unidentified_iii1-15	g__unidentified_iii1-15	s__unidentified_iii1-15	139075
OTU1494	1	0	0	0	0	0	0	0	0	0	0	0	0	0	2	0	0	0	0	1	0	0	0	2	0	0	0	0	0	0	0	0	0	0	0	0	k__Bacteria	p__Acidobacteria	c__Acidobacteria-6	o__iii1-15	f__unidentified_iii1-15	g__unidentified_iii1-15	s__unidentified_iii1-15	207376
OTU2790	0	0	0	0	0	0	0	1	2	0	1	0	0	0	0	0	0	0	0	0	0	0	0	0	0	0	0	0	0	0	0	0	1	0	1	0	k__Bacteria	p__Acidobacteria	c__Acidobacteria-6	o__iii1-15	f__unidentified_iii1-15	g__unidentified_iii1-15	s__unidentified_iii1-15	4469074
OTU3642	2	1	0	0	0	0	0	0	0	0	0	0	0	2	0	1	0	0	0	0	0	0	0	0	0	0	0	0	0	0	0	0	0	0	0	0	k__Bacteria	p__Acidobacteria	c__Acidobacteria-6	o__iii1-15	f__unidentified_iii1-15	g__unidentified_iii1-15	s__unidentified_iii1-15	675804
OTU3884	0	0	0	0	0	0	1	0	0	0	0	0	0	0	0	2	0	2	0	0	0	0	0	1	0	0	0	0	0	0	0	0	0	0	0	0	k__Bacteria	p__Acidobacteria	c__Acidobacteria-6	o__iii1-15	f__unidentified_iii1-15	g__unidentified_iii1-15	s__unidentified_iii1-15	4374754
OTU5001	0	2	2	0	0	0	0	0	0	0	0	0	0	0	1	1	0	0	0	0	0	0	0	0	0	0	0	0	0	0	0	0	0	0	0	0	k__Bacteria	p__Acidobacteria	c__Acidobacteria-6	o__iii1-15	f__unidentified_iii1-15	g__unidentified_iii1-15	s__unidentified_iii1-15	1925460
OTU8988	1	2	0	0	0	0	0	0	0	0	0	0	0	0	0	1	0	0	0	0	0	0	0	2	0	0	0	0	0	0	0	0	0	0	0	0	k__Bacteria	p__Acidobacteria	c__Acidobacteria-6	o__iii1-15	f__unidentified_iii1-15	g__unidentified_iii1-15	s__unidentified_iii1-15	4480648
OTU16522	0	0	0	1	0	1	0	0	0	0	0	0	0	0	0	0	0	0	1	0	0	0	0	0	0	0	0	0	0	0	0	0	2	0	0	1	k__Bacteria	p__Acidobacteria	c__Acidobacteria-6	o__iii1-15	f__unidentified_iii1-15	g__unidentified_iii1-15	s__unidentified_iii1-15	New.CleanUp.ReferenceOTU24850
OTU17256	0	0	0	0	0	0	1	0	0	0	1	1	1	0	0	0	1	0	0	1	0	0	0	0	0	0	0	0	0	0	0	0	0	0	0	0	k__Bacteria	p__Acidobacteria	c__Acidobacteria-6	o__iii1-15	f__unidentified_iii1-15	g__unidentified_iii1-15	s__unidentified_iii1-15	New.CleanUp.ReferenceOTU29462
OTU17900	4	0	0	0	0	0	0	0	0	0	0	0	0	1	0	1	0	0	0	0	0	0	0	0	0	0	0	0	0	0	0	0	0	0	0	0	k__Bacteria	p__Acidobacteria	c__Acidobacteria-6	o__iii1-15	f__unidentified_iii1-15	g__unidentified_iii1-15	s__unidentified_iii1-15	New.CleanUp.ReferenceOTU33324
OTU19698	0	0	0	0	0	0	0	0	0	0	1	0	1	0	0	0	1	0	0	0	0	0	0	0	0	0	0	0	0	0	0	0	0	0	1	2	k__Bacteria	p__Acidobacteria	c__Acidobacteria-6	o__iii1-15	f__unidentified_iii1-15	g__unidentified_iii1-15	s__unidentified_iii1-15	New.CleanUp.ReferenceOTU44471
OTU28288	1	1	0	0	0	0	0	0	0	0	0	0	0	0	3	0	0	0	0	0	0	0	0	0	0	0	0	0	0	1	0	0	0	0	0	0	k__Bacteria	p__Acidobacteria	c__Acidobacteria-6	o__iii1-15	f__unidentified_iii1-15	g__unidentified_iii1-15	s__unidentified_iii1-15	New.CleanUp.ReferenceOTU99290
OTU30561	2	1	0	0	0	0	0	0	0	0	0	0	0	2	1	0	0	0	0	0	0	0	0	0	0	0	0	0	0	0	0	0	0	0	0	0	k__Bacteria	p__Acidobacteria	c__Acidobacteria-6	o__iii1-15	f__unidentified_iii1-15	g__unidentified_iii1-15	s__unidentified_iii1-15	New.CleanUp.ReferenceOTU114150
OTU32368	1	0	0	0	0	0	0	0	0	0	0	0	0	0	0	2	0	0	0	0	0	0	0	3	0	0	0	0	0	0	0	0	0	0	0	0	k__Bacteria	p__Acidobacteria	c__Acidobacteria-6	o__iii1-15	f__unidentified_iii1-15	g__unidentified_iii1-15	s__unidentified_iii1-15	New.CleanUp.ReferenceOTU125824
OTU34209	0	1	1	0	0	0	1	0	0	0	0	0	0	0	2	0	0	0	1	0	0	0	0	0	0	0	0	0	0	0	0	0	0	0	0	0	k__Bacteria	p__Acidobacteria	c__Acidobacteria-6	o__iii1-15	f__unidentified_iii1-15	g__unidentified_iii1-15	s__unidentified_iii1-15	New.CleanUp.ReferenceOTU138146
OTU39412	0	0	0	0	0	0	0	0	0	0	0	3	0	0	0	0	0	0	1	2	0	0	0	0	0	0	0	0	0	0	0	0	0	0	0	0	k__Bacteria	p__Acidobacteria	c__Acidobacteria-6	o__iii1-15	f__unidentified_iii1-15	g__unidentified_iii1-15	s__unidentified_iii1-15	New.CleanUp.ReferenceOTU172437
OTU41676	0	0	4	0	0	0	0	0	0	0	0	0	0	0	0	0	0	0	1	1	0	0	0	0	0	0	0	0	0	0	0	0	0	0	0	0	k__Bacteria	p__Acidobacteria	c__Acidobacteria-6	o__iii1-15	f__unidentified_iii1-15	g__unidentified_iii1-15	s__unidentified_iii1-15	New.CleanUp.ReferenceOTU185777
OTU53586	0	0	0	0	1	0	0	0	0	1	0	1	0	0	0	0	0	0	0	0	2	1	0	0	0	0	0	0	0	0	0	0	0	0	0	0	k__Bacteria	p__Acidobacteria	c__Acidobacteria-6	o__iii1-15	f__unidentified_iii1-15	g__unidentified_iii1-15	s__unidentified_iii1-15	New.CleanUp.ReferenceOTU258378
OTU55337	0	0	0	0	0	0	0	0	1	0	0	0	0	0	1	1	1	0	0	0	1	0	0	1	0	0	0	0	0	0	0	0	0	0	0	0	k__Bacteria	p__Acidobacteria	c__Acidobacteria-6	o__iii1-15	f__unidentified_iii1-15	g__unidentified_iii1-15	s__unidentified_iii1-15	New.CleanUp.ReferenceOTU269670
OTU58310	1	3	0	0	0	0	0	0	0	0	0	0	1	0	0	0	0	0	0	1	0	0	0	0	0	0	0	0	0	0	0	0	0	0	0	0	k__Bacteria	p__Acidobacteria	c__Acidobacteria-6	o__iii1-15	f__unidentified_iii1-15	g__unidentified_iii1-15	s__unidentified_iii1-15	New.CleanUp.ReferenceOTU288021
OTU62606	0	0	0	0	0	0	0	0	0	0	0	0	0	4	1	0	0	0	0	0	0	0	0	1	0	0	0	0	0	0	0	0	0	0	0	0	k__Bacteria	p__Acidobacteria	c__Acidobacteria-6	o__iii1-15	f__unidentified_iii1-15	g__unidentified_iii1-15	s__unidentified_iii1-15	New.CleanUp.ReferenceOTU315370
OTU720	0	0	0	0	0	2	0	0	0	0	0	0	0	0	1	0	0	0	0	0	1	0	0	0	0	1	0	0	0	0	0	0	0	0	0	0	k__Bacteria	p__Acidobacteria	c__Acidobacteria-6	o__iii1-15	f__unidentified_iii1-15	g__unidentified_iii1-15	s__unidentified_iii1-15	4427084
OTU2740	1	1	0	0	0	0	0	0	0	0	0	0	0	2	0	0	0	0	1	0	0	0	0	0	0	0	0	0	0	0	0	0	0	0	0	0	k__Bacteria	p__Acidobacteria	c__Acidobacteria-6	o__iii1-15	f__unidentified_iii1-15	g__unidentified_iii1-15	s__unidentified_iii1-15	194730
OTU3757	0	0	1	0	0	1	0	0	1	0	0	0	1	0	0	0	0	0	1	0	0	0	0	0	0	0	0	0	0	0	0	0	0	0	0	0	k__Bacteria	p__Acidobacteria	c__Acidobacteria-6	o__iii1-15	f__unidentified_iii1-15	g__unidentified_iii1-15	s__unidentified_iii1-15	1142462
OTU5864	0	0	0	0	0	0	0	0	0	2	0	0	2	0	0	0	0	0	0	0	0	0	0	1	0	0	0	0	0	0	0	0	0	0	0	0	k__Bacteria	p__Acidobacteria	c__Acidobacteria-6	o__iii1-15	f__unidentified_iii1-15	g__unidentified_iii1-15	s__unidentified_iii1-15	136847
OTU8503	1	0	0	0	0	0	0	0	0	0	0	0	0	1	1	2	0	0	0	0	0	0	0	0	0	0	0	0	0	0	0	0	0	0	0	0	k__Bacteria	p__Acidobacteria	c__Acidobacteria-6	o__iii1-15	f__unidentified_iii1-15	g__unidentified_iii1-15	s__unidentified_iii1-15	4329546
OTU11460	0	1	3	0	1	0	0	0	0	0	0	0	0	0	0	0	0	0	0	0	0	0	0	0	0	0	0	0	0	0	0	0	0	0	0	0	k__Bacteria	p__Acidobacteria	c__Acidobacteria-6	o__iii1-15	f__unidentified_iii1-15	g__unidentified_iii1-15	s__unidentified_iii1-15	610188
OTU11489	5	0	0	0	0	0	0	0	0	0	0	0	0	0	0	0	0	0	0	0	0	0	0	0	0	0	0	0	0	0	0	0	0	0	0	0	k__Bacteria	p__Acidobacteria	c__Acidobacteria-6	o__iii1-15	f__unidentified_iii1-15	g__unidentified_iii1-15	s__unidentified_iii1-15	1048864
OTU16254	1	0	0	0	0	0	0	0	0	1	0	0	1	0	0	0	0	0	0	1	1	0	0	0	0	0	0	0	0	0	0	0	0	0	0	0	k__Bacteria	p__Acidobacteria	c__Acidobacteria-6	o__iii1-15	f__unidentified_iii1-15	g__unidentified_iii1-15	s__unidentified_iii1-15	New.CleanUp.ReferenceOTU23185
OTU17063	1	0	0	0	0	0	0	0	0	0	0	1	0	0	1	0	0	0	0	0	1	0	0	1	0	0	0	0	0	0	0	0	0	0	0	0	k__Bacteria	p__Acidobacteria	c__Acidobacteria-6	o__iii1-15	f__unidentified_iii1-15	g__unidentified_iii1-15	s__unidentified_iii1-15	New.CleanUp.ReferenceOTU28205
OTU17183	0	2	1	0	0	0	0	0	0	0	0	0	0	1	0	0	0	0	1	0	0	0	0	0	0	0	0	0	0	0	0	0	0	0	0	0	k__Bacteria	p__Acidobacteria	c__Acidobacteria-6	o__iii1-15	f__unidentified_iii1-15	g__unidentified_iii1-15	s__unidentified_iii1-15	New.CleanUp.ReferenceOTU29061
OTU22059	0	0	0	0	0	0	0	0	0	0	0	0	0	0	0	3	0	0	0	0	0	0	0	2	0	0	0	0	0	0	0	0	0	0	0	0	k__Bacteria	p__Acidobacteria	c__Acidobacteria-6	o__iii1-15	f__unidentified_iii1-15	g__unidentified_iii1-15	s__unidentified_iii1-15	New.CleanUp.ReferenceOTU59054
OTU28326	0	0	0	1	0	0	0	1	0	1	1	0	0	0	0	0	0	0	0	1	0	0	0	0	0	0	0	0	0	0	0	0	0	0	0	0	k__Bacteria	p__Acidobacteria	c__Acidobacteria-6	o__iii1-15	f__unidentified_iii1-15	g__unidentified_iii1-15	s__unidentified_iii1-15	New.CleanUp.ReferenceOTU99555
OTU30771	0	0	0	0	0	0	0	0	0	0	0	0	0	1	2	1	0	0	0	0	0	0	0	1	0	0	0	0	0	0	0	0	0	0	0	0	k__Bacteria	p__Acidobacteria	c__Acidobacteria-6	o__iii1-15	f__unidentified_iii1-15	g__unidentified_iii1-15	s__unidentified_iii1-15	New.CleanUp.ReferenceOTU115371
OTU33747	0	0	1	0	0	0	0	0	1	0	0	0	0	0	0	0	2	1	0	0	0	0	0	0	0	0	0	0	0	0	0	0	0	0	0	0	k__Bacteria	p__Acidobacteria	c__Acidobacteria-6	o__iii1-15	f__unidentified_iii1-15	g__unidentified_iii1-15	s__unidentified_iii1-15	New.CleanUp.ReferenceOTU134950
OTU34185	0	0	0	0	0	0	0	1	0	0	0	0	2	0	1	0	0	0	0	1	0	0	0	0	0	0	0	0	0	0	0	0	0	0	0	0	k__Bacteria	p__Acidobacteria	c__Acidobacteria-6	o__iii1-15	f__unidentified_iii1-15	g__unidentified_iii1-15	s__unidentified_iii1-15	New.CleanUp.ReferenceOTU137963
OTU35692	0	0	0	0	0	0	0	1	1	0	0	0	0	0	0	0	1	0	1	0	0	1	0	0	0	0	0	0	0	0	0	0	0	0	0	0	k__Bacteria	p__Acidobacteria	c__Acidobacteria-6	o__iii1-15	f__unidentified_iii1-15	g__unidentified_iii1-15	s__unidentified_iii1-15	New.CleanUp.ReferenceOTU147703
OTU36403	0	1	0	0	0	0	0	0	0	0	0	0	0	0	4	0	0	0	0	0	0	0	0	0	0	0	0	0	0	0	0	0	0	0	0	0	k__Bacteria	p__Acidobacteria	c__Acidobacteria-6	o__iii1-15	f__unidentified_iii1-15	g__unidentified_iii1-15	s__unidentified_iii1-15	New.CleanUp.ReferenceOTU152347
OTU39857	0	0	0	0	0	0	0	0	0	0	0	0	0	0	1	1	0	0	0	0	0	0	0	3	0	0	0	0	0	0	0	0	0	0	0	0	k__Bacteria	p__Acidobacteria	c__Acidobacteria-6	o__iii1-15	f__unidentified_iii1-15	g__unidentified_iii1-15	s__unidentified_iii1-15	New.CleanUp.ReferenceOTU175215
OTU43143	1	0	1	1	0	0	0	0	0	0	0	0	0	0	0	0	0	1	0	1	0	0	0	0	0	0	0	0	0	0	0	0	0	0	0	0	k__Bacteria	p__Acidobacteria	c__Acidobacteria-6	o__iii1-15	f__unidentified_iii1-15	g__unidentified_iii1-15	s__unidentified_iii1-15	New.CleanUp.ReferenceOTU194416
OTU50907	1	0	0	0	0	0	0	0	0	0	0	0	0	1	0	0	0	0	0	0	0	0	0	0	0	0	0	0	0	0	0	3	0	0	0	0	k__Bacteria	p__Acidobacteria	c__Acidobacteria-6	o__iii1-15	f__unidentified_iii1-15	g__unidentified_iii1-15	s__unidentified_iii1-15	New.CleanUp.ReferenceOTU242012
OTU51041	2	2	0	1	0	0	0	0	0	0	0	0	0	0	0	0	0	0	0	0	0	0	0	0	0	0	0	0	0	0	0	0	0	0	0	0	k__Bacteria	p__Acidobacteria	c__Acidobacteria-6	o__iii1-15	f__unidentified_iii1-15	g__unidentified_iii1-15	s__unidentified_iii1-15	New.CleanUp.ReferenceOTU242767
OTU53081	0	0	2	0	1	0	0	0	0	0	0	0	0	1	0	0	0	0	0	1	0	0	0	0	0	0	0	0	0	0	0	0	0	0	0	0	k__Bacteria	p__Acidobacteria	c__Acidobacteria-6	o__iii1-15	f__unidentified_iii1-15	g__unidentified_iii1-15	s__unidentified_iii1-15	New.CleanUp.ReferenceOTU255378
OTU53475	0	1	0	0	0	0	0	0	1	0	0	0	0	0	0	0	0	0	0	0	1	0	0	2	0	0	0	0	0	0	0	0	0	0	0	0	k__Bacteria	p__Acidobacteria	c__Acidobacteria-6	o__iii1-15	f__unidentified_iii1-15	g__unidentified_iii1-15	s__unidentified_iii1-15	New.CleanUp.ReferenceOTU257681
OTU59878	1	0	0	1	0	0	0	0	0	0	0	2	1	0	0	0	0	0	0	0	0	0	0	0	0	0	0	0	0	0	0	0	0	0	0	0	k__Bacteria	p__Acidobacteria	c__Acidobacteria-6	o__iii1-15	f__unidentified_iii1-15	g__unidentified_iii1-15	s__unidentified_iii1-15	New.CleanUp.ReferenceOTU298117
OTU63604	0	0	0	0	0	0	0	0	0	0	0	0	0	0	0	0	1	0	0	0	1	0	2	0	0	0	0	0	0	0	0	0	0	0	0	1	k__Bacteria	p__Acidobacteria	c__Acidobacteria-6	o__iii1-15	f__unidentified_iii1-15	g__unidentified_iii1-15	s__unidentified_iii1-15	New.CleanUp.ReferenceOTU321513
OTU66417	0	0	0	0	0	0	0	0	0	0	0	0	0	0	0	5	0	0	0	0	0	0	0	0	0	0	0	0	0	0	0	0	0	0	0	0	k__Bacteria	p__Acidobacteria	c__Acidobacteria-6	o__iii1-15	f__unidentified_iii1-15	g__unidentified_iii1-15	s__unidentified_iii1-15	New.CleanUp.ReferenceOTU340352
OTU995	0	1	0	0	0	0	0	0	0	0	0	0	0	0	0	0	0	0	1	2	0	0	0	0	0	0	0	0	0	0	0	0	0	0	0	0	k__Bacteria	p__Acidobacteria	c__Acidobacteria-6	o__iii1-15	f__unidentified_iii1-15	g__unidentified_iii1-15	s__unidentified_iii1-15	695392
OTU5826	0	0	0	0	0	0	0	0	0	0	0	0	0	1	0	1	0	0	0	0	0	0	0	2	0	0	0	0	0	0	0	0	0	0	0	0	k__Bacteria	p__Acidobacteria	c__Acidobacteria-6	o__iii1-15	f__unidentified_iii1-15	g__unidentified_iii1-15	s__unidentified_iii1-15	4340285
OTU6676	1	0	0	0	0	0	0	0	0	0	0	1	0	1	0	0	0	0	0	0	0	0	0	1	0	0	0	0	0	0	0	0	0	0	0	0	k__Bacteria	p__Acidobacteria	c__Acidobacteria-6	o__iii1-15	f__unidentified_iii1-15	g__unidentified_iii1-15	s__unidentified_iii1-15	292370
OTU7332	0	0	0	0	0	0	0	0	0	0	0	0	0	0	0	1	0	0	0	0	0	0	0	3	0	0	0	0	0	0	0	0	0	0	0	0	k__Bacteria	p__Acidobacteria	c__Acidobacteria-6	o__iii1-15	f__unidentified_iii1-15	g__unidentified_iii1-15	s__unidentified_iii1-15	114383
OTU8532	0	0	0	1	0	0	0	0	0	1	0	1	0	0	0	0	0	0	0	0	0	0	0	0	0	0	0	0	0	0	0	0	0	0	1	0	k__Bacteria	p__Acidobacteria	c__Acidobacteria-6	o__iii1-15	f__unidentified_iii1-15	g__unidentified_iii1-15	s__unidentified_iii1-15	223520
OTU9369	0	0	0	0	0	0	0	0	0	0	0	0	0	0	0	3	0	0	0	0	0	0	0	1	0	0	0	0	0	0	0	0	0	0	0	0	k__Bacteria	p__Acidobacteria	c__Acidobacteria-6	o__iii1-15	f__unidentified_iii1-15	g__unidentified_iii1-15	s__unidentified_iii1-15	4348980
OTU11365	1	0	0	0	0	0	0	0	0	0	0	0	0	0	0	3	0	0	0	0	0	0	0	0	0	0	0	0	0	0	0	0	0	0	0	0	k__Bacteria	p__Acidobacteria	c__Acidobacteria-6	o__iii1-15	f__unidentified_iii1-15	g__unidentified_iii1-15	s__unidentified_iii1-15	93865
OTU11428	0	0	0	0	0	1	0	0	0	1	0	0	0	0	1	0	0	0	0	0	0	0	0	0	0	0	0	0	0	0	0	0	0	1	0	0	k__Bacteria	p__Acidobacteria	c__Acidobacteria-6	o__iii1-15	f__unidentified_iii1-15	g__unidentified_iii1-15	s__unidentified_iii1-15	1139045
OTU11948	0	0	0	0	0	0	0	1	0	0	0	1	1	0	0	0	0	0	0	0	0	0	1	0	0	0	0	0	0	0	0	0	0	0	0	0	k__Bacteria	p__Acidobacteria	c__Acidobacteria-6	o__iii1-15	f__unidentified_iii1-15	g__unidentified_iii1-15	s__unidentified_iii1-15	New.ReferenceOTU1004
OTU13673	0	0	0	0	0	0	0	0	0	0	0	0	1	1	0	0	0	0	0	0	2	0	0	0	0	0	0	0	0	0	0	0	0	0	0	0	k__Bacteria	p__Acidobacteria	c__Acidobacteria-6	o__iii1-15	f__unidentified_iii1-15	g__unidentified_iii1-15	s__unidentified_iii1-15	New.CleanUp.ReferenceOTU7794
OTU13951	0	0	0	0	0	0	0	0	0	0	0	0	1	0	1	0	0	0	2	0	0	0	0	0	0	0	0	0	0	0	0	0	0	0	0	0	k__Bacteria	p__Acidobacteria	c__Acidobacteria-6	o__iii1-15	f__unidentified_iii1-15	g__unidentified_iii1-15	s__unidentified_iii1-15	New.CleanUp.ReferenceOTU9461
OTU14327	0	0	0	0	0	0	0	0	0	0	0	0	1	2	0	0	0	0	1	0	0	0	0	0	0	0	0	0	0	0	0	0	0	0	0	0	k__Bacteria	p__Acidobacteria	c__Acidobacteria-6	o__iii1-15	f__unidentified_iii1-15	g__unidentified_iii1-15	s__unidentified_iii1-15	New.CleanUp.ReferenceOTU11724
OTU15764	0	0	0	0	0	0	0	1	1	1	0	0	0	0	0	0	0	0	0	0	0	0	0	0	0	0	0	0	0	0	0	0	0	1	0	0	k__Bacteria	p__Acidobacteria	c__Acidobacteria-6	o__iii1-15	f__unidentified_iii1-15	g__unidentified_iii1-15	s__unidentified_iii1-15	New.CleanUp.ReferenceOTU20553
OTU16436	0	0	0	0	0	0	0	0	1	1	0	0	0	0	0	0	1	0	0	0	0	0	0	0	0	0	0	0	0	0	0	0	0	0	1	0	k__Bacteria	p__Acidobacteria	c__Acidobacteria-6	o__iii1-15	f__unidentified_iii1-15	g__unidentified_iii1-15	s__unidentified_iii1-15	New.CleanUp.ReferenceOTU24296
OTU20412	0	0	0	1	0	0	0	1	0	0	0	1	0	0	0	0	0	1	0	0	0	0	0	0	0	0	0	0	0	0	0	0	0	0	0	0	k__Bacteria	p__Acidobacteria	c__Acidobacteria-6	o__iii1-15	f__unidentified_iii1-15	g__unidentified_iii1-15	s__unidentified_iii1-15	New.CleanUp.ReferenceOTU48857
OTU21027	0	0	0	0	1	0	0	0	0	0	0	0	1	0	0	0	0	0	0	0	1	0	1	0	0	0	0	0	0	0	0	0	0	0	0	0	k__Bacteria	p__Acidobacteria	c__Acidobacteria-6	o__iii1-15	f__unidentified_iii1-15	g__unidentified_iii1-15	s__unidentified_iii1-15	New.CleanUp.ReferenceOTU52658
OTU23038	0	0	0	0	0	0	0	0	0	0	0	0	0	2	0	0	0	0	0	0	0	1	0	1	0	0	0	0	0	0	0	0	0	0	0	0	k__Bacteria	p__Acidobacteria	c__Acidobacteria-6	o__iii1-15	f__unidentified_iii1-15	g__unidentified_iii1-15	s__unidentified_iii1-15	New.CleanUp.ReferenceOTU65329
OTU23770	0	0	1	0	0	0	0	0	0	0	0	0	1	0	0	0	0	0	0	0	0	1	0	1	0	0	0	0	0	0	0	0	0	0	0	0	k__Bacteria	p__Acidobacteria	c__Acidobacteria-6	o__iii1-15	f__unidentified_iii1-15	g__unidentified_iii1-15	s__unidentified_iii1-15	New.CleanUp.ReferenceOTU69992
OTU26537	0	0	0	0	0	0	0	0	0	0	0	0	0	0	0	0	0	0	1	1	0	2	0	0	0	0	0	0	0	0	0	0	0	0	0	0	k__Bacteria	p__Acidobacteria	c__Acidobacteria-6	o__iii1-15	f__unidentified_iii1-15	g__unidentified_iii1-15	s__unidentified_iii1-15	New.CleanUp.ReferenceOTU87824
OTU29306	0	0	0	0	0	0	1	0	1	0	2	0	0	0	0	0	0	0	0	0	0	0	0	0	0	0	0	0	0	0	0	0	0	0	0	0	k__Bacteria	p__Acidobacteria	c__Acidobacteria-6	o__iii1-15	f__unidentified_iii1-15	g__unidentified_iii1-15	s__unidentified_iii1-15	New.CleanUp.ReferenceOTU106107
OTU29634	0	0	0	0	0	0	0	0	0	0	0	0	0	0	0	0	0	0	0	0	0	0	0	4	0	0	0	0	0	0	0	0	0	0	0	0	k__Bacteria	p__Acidobacteria	c__Acidobacteria-6	o__iii1-15	f__unidentified_iii1-15	g__unidentified_iii1-15	s__unidentified_iii1-15	New.CleanUp.ReferenceOTU108279
OTU30920	0	0	0	0	0	0	0	0	0	0	0	0	0	0	0	3	0	0	0	0	0	0	0	1	0	0	0	0	0	0	0	0	0	0	0	0	k__Bacteria	p__Acidobacteria	c__Acidobacteria-6	o__iii1-15	f__unidentified_iii1-15	g__unidentified_iii1-15	s__unidentified_iii1-15	New.CleanUp.ReferenceOTU116207
OTU31276	0	0	1	0	0	1	0	0	1	0	0	1	0	0	0	0	0	0	0	0	0	0	0	0	0	0	0	0	0	0	0	0	0	0	0	0	k__Bacteria	p__Acidobacteria	c__Acidobacteria-6	o__iii1-15	f__unidentified_iii1-15	g__unidentified_iii1-15	s__unidentified_iii1-15	New.CleanUp.ReferenceOTU118630
OTU32756	0	0	0	0	0	1	0	0	1	0	1	0	0	0	0	0	0	1	0	0	0	0	0	0	0	0	0	0	0	0	0	0	0	0	0	0	k__Bacteria	p__Acidobacteria	c__Acidobacteria-6	o__iii1-15	f__unidentified_iii1-15	g__unidentified_iii1-15	s__unidentified_iii1-15	New.CleanUp.ReferenceOTU128350
OTU33694	1	0	0	1	1	0	0	0	0	1	0	0	0	0	0	0	0	0	0	0	0	0	0	0	0	0	0	0	0	0	0	0	0	0	0	0	k__Bacteria	p__Acidobacteria	c__Acidobacteria-6	o__iii1-15	f__unidentified_iii1-15	g__unidentified_iii1-15	s__unidentified_iii1-15	New.CleanUp.ReferenceOTU134684
OTU34915	0	1	0	0	0	0	0	0	0	0	0	1	0	0	0	0	0	1	0	0	0	1	0	0	0	0	0	0	0	0	0	0	0	0	0	0	k__Bacteria	p__Acidobacteria	c__Acidobacteria-6	o__iii1-15	f__unidentified_iii1-15	g__unidentified_iii1-15	s__unidentified_iii1-15	New.CleanUp.ReferenceOTU142591
OTU36756	0	1	0	0	0	0	0	0	0	0	0	0	0	0	0	0	0	0	0	1	2	0	0	0	0	0	0	0	0	0	0	0	0	0	0	0	k__Bacteria	p__Acidobacteria	c__Acidobacteria-6	o__iii1-15	f__unidentified_iii1-15	g__unidentified_iii1-15	s__unidentified_iii1-15	New.CleanUp.ReferenceOTU154893
OTU38192	0	0	0	0	0	0	0	0	0	0	2	0	1	0	0	0	1	0	0	0	0	0	0	0	0	0	0	0	0	0	0	0	0	0	0	0	k__Bacteria	p__Acidobacteria	c__Acidobacteria-6	o__iii1-15	f__unidentified_iii1-15	g__unidentified_iii1-15	s__unidentified_iii1-15	New.CleanUp.ReferenceOTU164412
OTU40546	0	0	0	0	0	0	1	0	0	0	0	0	0	1	0	0	0	0	0	0	0	0	0	0	0	0	0	0	0	0	0	0	1	1	0	0	k__Bacteria	p__Acidobacteria	c__Acidobacteria-6	o__iii1-15	f__unidentified_iii1-15	g__unidentified_iii1-15	s__unidentified_iii1-15	New.CleanUp.ReferenceOTU179077
OTU41423	0	0	0	0	1	0	0	1	0	0	0	0	0	0	0	0	2	0	0	0	0	0	0	0	0	0	0	0	0	0	0	0	0	0	0	0	k__Bacteria	p__Acidobacteria	c__Acidobacteria-6	o__iii1-15	f__unidentified_iii1-15	g__unidentified_iii1-15	s__unidentified_iii1-15	New.CleanUp.ReferenceOTU184235
OTU44652	0	0	0	0	0	0	0	0	0	0	0	0	2	0	0	0	2	0	0	0	0	0	0	0	0	0	0	0	0	0	0	0	0	0	0	0	k__Bacteria	p__Acidobacteria	c__Acidobacteria-6	o__iii1-15	f__unidentified_iii1-15	g__unidentified_iii1-15	s__unidentified_iii1-15	New.CleanUp.ReferenceOTU203305
OTU46441	0	0	0	0	0	0	0	1	0	0	3	0	0	0	0	0	0	0	0	0	0	0	0	0	0	0	0	0	0	0	0	0	0	0	0	0	k__Bacteria	p__Acidobacteria	c__Acidobacteria-6	o__iii1-15	f__unidentified_iii1-15	g__unidentified_iii1-15	s__unidentified_iii1-15	New.CleanUp.ReferenceOTU214574
OTU46741	0	0	0	0	0	0	0	0	0	0	0	0	0	0	0	1	0	0	0	0	0	0	0	3	0	0	0	0	0	0	0	0	0	0	0	0	k__Bacteria	p__Acidobacteria	c__Acidobacteria-6	o__iii1-15	f__unidentified_iii1-15	g__unidentified_iii1-15	s__unidentified_iii1-15	New.CleanUp.ReferenceOTU216382
OTU50324	0	0	2	0	0	0	0	0	0	0	0	0	0	0	0	0	0	0	0	1	1	0	0	0	0	0	0	0	0	0	0	0	0	0	0	0	k__Bacteria	p__Acidobacteria	c__Acidobacteria-6	o__iii1-15	f__unidentified_iii1-15	g__unidentified_iii1-15	s__unidentified_iii1-15	New.CleanUp.ReferenceOTU238477
OTU55535	0	0	0	0	0	0	0	0	0	0	0	0	0	1	0	0	0	0	0	0	0	0	0	3	0	0	0	0	0	0	0	0	0	0	0	0	k__Bacteria	p__Acidobacteria	c__Acidobacteria-6	o__iii1-15	f__unidentified_iii1-15	g__unidentified_iii1-15	s__unidentified_iii1-15	New.CleanUp.ReferenceOTU270984
OTU57811	0	0	0	0	0	0	1	2	0	0	0	0	0	0	0	0	0	1	0	0	0	0	0	0	0	0	0	0	0	0	0	0	0	0	0	0	k__Bacteria	p__Acidobacteria	c__Acidobacteria-6	o__iii1-15	f__unidentified_iii1-15	g__unidentified_iii1-15	s__unidentified_iii1-15	New.CleanUp.ReferenceOTU285073
OTU58515	0	1	0	0	0	0	0	0	0	0	0	0	0	1	0	2	0	0	0	0	0	0	0	0	0	0	0	0	0	0	0	0	0	0	0	0	k__Bacteria	p__Acidobacteria	c__Acidobacteria-6	o__iii1-15	f__unidentified_iii1-15	g__unidentified_iii1-15	s__unidentified_iii1-15	New.CleanUp.ReferenceOTU289372
OTU59163	0	1	0	0	0	0	0	0	0	0	0	0	1	0	0	0	0	0	0	0	2	0	0	0	0	0	0	0	0	0	0	0	0	0	0	0	k__Bacteria	p__Acidobacteria	c__Acidobacteria-6	o__iii1-15	f__unidentified_iii1-15	g__unidentified_iii1-15	s__unidentified_iii1-15	New.CleanUp.ReferenceOTU293465
OTU64728	0	0	0	0	0	0	0	1	1	0	0	0	1	0	0	0	0	0	0	0	0	0	1	0	0	0	0	0	0	0	0	0	0	0	0	0	k__Bacteria	p__Acidobacteria	c__Acidobacteria-6	o__iii1-15	f__unidentified_iii1-15	g__unidentified_iii1-15	s__unidentified_iii1-15	New.CleanUp.ReferenceOTU329350
OTU64838	0	0	0	0	1	1	0	0	0	0	0	0	0	0	0	0	0	0	0	1	0	0	0	0	0	0	0	0	0	0	0	0	0	0	1	0	k__Bacteria	p__Acidobacteria	c__Acidobacteria-6	o__iii1-15	f__unidentified_iii1-15	g__unidentified_iii1-15	s__unidentified_iii1-15	New.CleanUp.ReferenceOTU330032
OTU65622	0	0	1	0	0	0	0	0	0	0	0	0	0	0	0	0	0	0	1	1	0	0	1	0	0	0	0	0	0	0	0	0	0	0	0	0	k__Bacteria	p__Acidobacteria	c__Acidobacteria-6	o__iii1-15	f__unidentified_iii1-15	g__unidentified_iii1-15	s__unidentified_iii1-15	New.CleanUp.ReferenceOTU335007
OTU2297	0	1	0	0	0	0	0	0	0	0	0	0	0	0	1	0	0	0	0	0	0	0	0	1	0	0	0	0	0	0	0	0	0	0	0	0	k__Bacteria	p__Acidobacteria	c__Acidobacteria-6	o__iii1-15	f__unidentified_iii1-15	g__unidentified_iii1-15	s__unidentified_iii1-15	4443378
OTU2746	0	0	0	0	0	0	0	0	0	0	0	0	0	0	2	0	0	0	0	0	0	0	0	1	0	0	0	0	0	0	0	0	0	0	0	0	k__Bacteria	p__Acidobacteria	c__Acidobacteria-6	o__iii1-15	f__unidentified_iii1-15	g__unidentified_iii1-15	s__unidentified_iii1-15	142821
OTU2876	0	0	0	0	0	0	0	0	0	0	0	0	1	0	0	0	0	0	0	0	0	0	0	2	0	0	0	0	0	0	0	0	0	0	0	0	k__Bacteria	p__Acidobacteria	c__Acidobacteria-6	o__iii1-15	f__unidentified_iii1-15	g__unidentified_iii1-15	s__unidentified_iii1-15	701743
OTU3221	0	0	0	0	0	0	0	0	0	0	0	0	0	0	0	3	0	0	0	0	0	0	0	0	0	0	0	0	0	0	0	0	0	0	0	0	k__Bacteria	p__Acidobacteria	c__Acidobacteria-6	o__iii1-15	f__unidentified_iii1-15	g__unidentified_iii1-15	s__unidentified_iii1-15	340199
OTU3676	1	0	1	0	0	0	0	0	0	0	0	0	0	0	1	0	0	0	0	0	0	0	0	0	0	0	0	0	0	0	0	0	0	0	0	0	k__Bacteria	p__Acidobacteria	c__Acidobacteria-6	o__iii1-15	f__unidentified_iii1-15	g__unidentified_iii1-15	s__unidentified_iii1-15	88269
OTU5447	1	0	0	0	0	0	0	0	0	0	0	0	0	0	0	2	0	0	0	0	0	0	0	0	0	0	0	0	0	0	0	0	0	0	0	0	k__Bacteria	p__Acidobacteria	c__Acidobacteria-6	o__iii1-15	f__unidentified_iii1-15	g__unidentified_iii1-15	s__unidentified_iii1-15	362645
OTU6023	0	2	0	0	0	0	0	0	0	1	0	0	0	0	0	0	0	0	0	0	0	0	0	0	0	0	0	0	0	0	0	0	0	0	0	0	k__Bacteria	p__Acidobacteria	c__Acidobacteria-6	o__iii1-15	f__unidentified_iii1-15	g__unidentified_iii1-15	s__unidentified_iii1-15	90674
OTU7743	0	0	0	0	0	0	0	0	0	0	0	0	0	0	1	1	0	0	0	0	0	0	0	1	0	0	0	0	0	0	0	0	0	0	0	0	k__Bacteria	p__Acidobacteria	c__Acidobacteria-6	o__iii1-15	f__unidentified_iii1-15	g__unidentified_iii1-15	s__unidentified_iii1-15	4432544
OTU8890	0	1	0	0	0	0	0	0	0	0	0	0	0	0	0	0	0	0	0	0	0	0	0	2	0	0	0	0	0	0	0	0	0	0	0	0	k__Bacteria	p__Acidobacteria	c__Acidobacteria-6	o__iii1-15	f__unidentified_iii1-15	g__unidentified_iii1-15	s__unidentified_iii1-15	4419238
OTU9602	0	0	1	0	0	0	0	1	0	0	0	0	0	0	0	0	0	0	0	1	0	0	0	0	0	0	0	0	0	0	0	0	0	0	0	0	k__Bacteria	p__Acidobacteria	c__Acidobacteria-6	o__iii1-15	f__unidentified_iii1-15	g__unidentified_iii1-15	s__unidentified_iii1-15	4418151
OTU10913	0	0	0	0	0	0	0	0	0	0	0	1	2	0	0	0	0	0	0	0	0	0	0	0	0	0	0	0	0	0	0	0	0	0	0	0	k__Bacteria	p__Acidobacteria	c__Acidobacteria-6	o__iii1-15	f__unidentified_iii1-15	g__unidentified_iii1-15	s__unidentified_iii1-15	245188
OTU11077	0	0	0	0	0	0	0	0	0	0	0	0	0	0	0	0	0	0	0	0	0	0	0	3	0	0	0	0	0	0	0	0	0	0	0	0	k__Bacteria	p__Acidobacteria	c__Acidobacteria-6	o__iii1-15	f__unidentified_iii1-15	g__unidentified_iii1-15	s__unidentified_iii1-15	4418275
OTU12821	0	0	1	0	0	0	0	1	0	0	0	0	0	0	0	0	0	0	1	0	0	0	0	0	0	0	0	0	0	0	0	0	0	0	0	0	k__Bacteria	p__Acidobacteria	c__Acidobacteria-6	o__iii1-15	f__unidentified_iii1-15	g__unidentified_iii1-15	s__unidentified_iii1-15	New.CleanUp.ReferenceOTU2492
OTU12851	1	0	0	0	0	0	0	0	0	0	0	1	0	1	0	0	0	0	0	0	0	0	0	0	0	0	0	0	0	0	0	0	0	0	0	0	k__Bacteria	p__Acidobacteria	c__Acidobacteria-6	o__iii1-15	f__unidentified_iii1-15	g__unidentified_iii1-15	s__unidentified_iii1-15	New.CleanUp.ReferenceOTU2606
OTU13279	0	0	0	2	0	0	0	0	0	0	0	0	0	0	0	0	0	0	0	1	0	0	0	0	0	0	0	0	0	0	0	0	0	0	0	0	k__Bacteria	p__Acidobacteria	c__Acidobacteria-6	o__iii1-15	f__unidentified_iii1-15	g__unidentified_iii1-15	s__unidentified_iii1-15	New.CleanUp.ReferenceOTU5205
OTU13506	0	0	0	0	0	0	0	0	0	0	0	0	0	0	0	0	1	0	1	1	0	0	0	0	0	0	0	0	0	0	0	0	0	0	0	0	k__Bacteria	p__Acidobacteria	c__Acidobacteria-6	o__iii1-15	f__unidentified_iii1-15	g__unidentified_iii1-15	s__unidentified_iii1-15	New.CleanUp.ReferenceOTU6652
OTU13509	0	0	0	0	0	0	0	0	0	0	0	0	0	0	0	0	0	0	0	0	0	0	0	0	0	1	1	0	1	0	0	0	0	0	0	0	k__Bacteria	p__Acidobacteria	c__Acidobacteria-6	o__iii1-15	f__unidentified_iii1-15	g__unidentified_iii1-15	s__unidentified_iii1-15	New.CleanUp.ReferenceOTU6681
OTU13623	2	0	0	0	0	0	0	0	0	0	0	0	0	0	0	0	0	0	0	0	1	0	0	0	0	0	0	0	0	0	0	0	0	0	0	0	k__Bacteria	p__Acidobacteria	c__Acidobacteria-6	o__iii1-15	f__unidentified_iii1-15	g__unidentified_iii1-15	s__unidentified_iii1-15	New.CleanUp.ReferenceOTU7448
OTU13998	1	0	1	0	0	0	0	0	0	0	0	0	0	0	1	0	0	0	0	0	0	0	0	0	0	0	0	0	0	0	0	0	0	0	0	0	k__Bacteria	p__Acidobacteria	c__Acidobacteria-6	o__iii1-15	f__unidentified_iii1-15	g__unidentified_iii1-15	s__unidentified_iii1-15	New.CleanUp.ReferenceOTU9754
OTU14865	0	0	0	0	1	0	0	0	0	0	0	0	0	0	0	1	0	0	0	1	0	0	0	0	0	0	0	0	0	0	0	0	0	0	0	0	k__Bacteria	p__Acidobacteria	c__Acidobacteria-6	o__iii1-15	f__unidentified_iii1-15	g__unidentified_iii1-15	s__unidentified_iii1-15	New.CleanUp.ReferenceOTU14990
OTU15062	0	0	0	0	0	0	0	0	0	0	0	0	0	0	0	0	0	0	0	0	0	0	0	1	0	0	0	0	0	0	0	0	0	0	2	0	k__Bacteria	p__Acidobacteria	c__Acidobacteria-6	o__iii1-15	f__unidentified_iii1-15	g__unidentified_iii1-15	s__unidentified_iii1-15	New.CleanUp.ReferenceOTU16066
OTU17172	0	0	0	0	0	0	0	0	0	0	0	0	0	3	0	0	0	0	0	0	0	0	0	0	0	0	0	0	0	0	0	0	0	0	0	0	k__Bacteria	p__Acidobacteria	c__Acidobacteria-6	o__iii1-15	f__unidentified_iii1-15	g__unidentified_iii1-15	s__unidentified_iii1-15	New.CleanUp.ReferenceOTU28972
OTU17234	0	1	0	0	0	0	0	0	0	0	0	0	0	0	0	0	0	0	2	0	0	0	0	0	0	0	0	0	0	0	0	0	0	0	0	0	k__Bacteria	p__Acidobacteria	c__Acidobacteria-6	o__iii1-15	f__unidentified_iii1-15	g__unidentified_iii1-15	s__unidentified_iii1-15	New.CleanUp.ReferenceOTU29344
OTU17443	0	0	0	0	0	0	0	0	0	0	0	0	0	0	0	0	0	0	0	0	0	0	0	0	0	0	0	0	0	0	0	0	0	0	2	1	k__Bacteria	p__Acidobacteria	c__Acidobacteria-6	o__iii1-15	f__unidentified_iii1-15	g__unidentified_iii1-15	s__unidentified_iii1-15	New.CleanUp.ReferenceOTU30509
OTU18732	1	2	0	0	0	0	0	0	0	0	0	0	0	0	0	0	0	0	0	0	0	0	0	0	0	0	0	0	0	0	0	0	0	0	0	0	k__Bacteria	p__Acidobacteria	c__Acidobacteria-6	o__iii1-15	f__unidentified_iii1-15	g__unidentified_iii1-15	s__unidentified_iii1-15	New.CleanUp.ReferenceOTU38449
OTU20167	0	0	1	0	0	0	0	1	0	0	0	0	0	0	0	0	1	0	0	0	0	0	0	0	0	0	0	0	0	0	0	0	0	0	0	0	k__Bacteria	p__Acidobacteria	c__Acidobacteria-6	o__iii1-15	f__unidentified_iii1-15	g__unidentified_iii1-15	s__unidentified_iii1-15	New.CleanUp.ReferenceOTU47274
OTU20754	0	0	0	0	0	0	0	0	0	2	0	0	0	0	0	0	0	0	0	1	0	0	0	0	0	0	0	0	0	0	0	0	0	0	0	0	k__Bacteria	p__Acidobacteria	c__Acidobacteria-6	o__iii1-15	f__unidentified_iii1-15	g__unidentified_iii1-15	s__unidentified_iii1-15	New.CleanUp.ReferenceOTU50961
OTU22496	0	0	0	0	0	0	0	2	0	0	0	0	0	0	0	0	0	0	1	0	0	0	0	0	0	0	0	0	0	0	0	0	0	0	0	0	k__Bacteria	p__Acidobacteria	c__Acidobacteria-6	o__iii1-15	f__unidentified_iii1-15	g__unidentified_iii1-15	s__unidentified_iii1-15	New.CleanUp.ReferenceOTU61782
OTU22642	3	0	0	0	0	0	0	0	0	0	0	0	0	0	0	0	0	0	0	0	0	0	0	0	0	0	0	0	0	0	0	0	0	0	0	0	k__Bacteria	p__Acidobacteria	c__Acidobacteria-6	o__iii1-15	f__unidentified_iii1-15	g__unidentified_iii1-15	s__unidentified_iii1-15	New.CleanUp.ReferenceOTU62698
OTU23453	0	0	0	0	0	0	0	0	1	0	0	0	1	0	0	0	0	0	0	0	0	0	0	0	0	0	0	0	0	0	0	0	0	1	0	0	k__Bacteria	p__Acidobacteria	c__Acidobacteria-6	o__iii1-15	f__unidentified_iii1-15	g__unidentified_iii1-15	s__unidentified_iii1-15	New.CleanUp.ReferenceOTU67984
OTU23464	0	0	0	0	0	0	0	0	0	0	0	0	0	0	0	1	0	0	0	0	0	0	0	2	0	0	0	0	0	0	0	0	0	0	0	0	k__Bacteria	p__Acidobacteria	c__Acidobacteria-6	o__iii1-15	f__unidentified_iii1-15	g__unidentified_iii1-15	s__unidentified_iii1-15	New.CleanUp.ReferenceOTU68039
OTU25829	0	0	2	0	0	0	0	0	0	0	0	0	0	0	0	0	0	0	1	0	0	0	0	0	0	0	0	0	0	0	0	0	0	0	0	0	k__Bacteria	p__Acidobacteria	c__Acidobacteria-6	o__iii1-15	f__unidentified_iii1-15	g__unidentified_iii1-15	s__unidentified_iii1-15	New.CleanUp.ReferenceOTU83176
OTU29427	1	1	0	0	0	0	0	0	0	0	0	0	0	0	0	0	0	0	0	0	0	0	0	1	0	0	0	0	0	0	0	0	0	0	0	0	k__Bacteria	p__Acidobacteria	c__Acidobacteria-6	o__iii1-15	f__unidentified_iii1-15	g__unidentified_iii1-15	s__unidentified_iii1-15	New.CleanUp.ReferenceOTU106816
OTU31397	0	0	0	0	0	0	0	0	0	0	0	0	0	0	0	0	1	0	0	0	0	0	0	0	0	1	0	0	0	0	1	0	0	0	0	0	k__Bacteria	p__Acidobacteria	c__Acidobacteria-6	o__iii1-15	f__unidentified_iii1-15	g__unidentified_iii1-15	s__unidentified_iii1-15	New.CleanUp.ReferenceOTU119354
OTU32038	0	0	0	0	0	0	0	0	0	0	0	0	0	0	0	0	0	0	0	0	0	0	0	0	0	0	0	0	0	0	0	0	0	2	0	1	k__Bacteria	p__Acidobacteria	c__Acidobacteria-6	o__iii1-15	f__unidentified_iii1-15	g__unidentified_iii1-15	s__unidentified_iii1-15	New.CleanUp.ReferenceOTU123646
OTU32076	0	0	0	0	0	0	0	0	0	0	0	0	0	2	1	0	0	0	0	0	0	0	0	0	0	0	0	0	0	0	0	0	0	0	0	0	k__Bacteria	p__Acidobacteria	c__Acidobacteria-6	o__iii1-15	f__unidentified_iii1-15	g__unidentified_iii1-15	s__unidentified_iii1-15	New.CleanUp.ReferenceOTU123844
OTU32150	0	0	0	0	0	0	0	0	0	0	0	0	1	0	0	0	0	0	1	0	0	0	1	0	0	0	0	0	0	0	0	0	0	0	0	0	k__Bacteria	p__Acidobacteria	c__Acidobacteria-6	o__iii1-15	f__unidentified_iii1-15	g__unidentified_iii1-15	s__unidentified_iii1-15	New.CleanUp.ReferenceOTU124378
OTU32241	0	1	0	1	0	0	0	0	0	0	0	0	0	0	0	0	0	0	0	1	0	0	0	0	0	0	0	0	0	0	0	0	0	0	0	0	k__Bacteria	p__Acidobacteria	c__Acidobacteria-6	o__iii1-15	f__unidentified_iii1-15	g__unidentified_iii1-15	s__unidentified_iii1-15	New.CleanUp.ReferenceOTU124948
OTU32302	0	0	0	0	1	0	0	0	0	0	0	0	0	0	0	0	0	1	0	0	0	0	0	0	0	0	0	0	0	0	0	0	0	1	0	0	k__Bacteria	p__Acidobacteria	c__Acidobacteria-6	o__iii1-15	f__unidentified_iii1-15	g__unidentified_iii1-15	s__unidentified_iii1-15	New.CleanUp.ReferenceOTU125355
OTU32416	0	0	0	0	0	0	0	0	0	0	0	0	1	2	0	0	0	0	0	0	0	0	0	0	0	0	0	0	0	0	0	0	0	0	0	0	k__Bacteria	p__Acidobacteria	c__Acidobacteria-6	o__iii1-15	f__unidentified_iii1-15	g__unidentified_iii1-15	s__unidentified_iii1-15	New.CleanUp.ReferenceOTU126087
OTU32677	1	1	0	0	0	0	0	0	0	0	0	0	0	0	0	0	0	0	0	0	0	0	0	1	0	0	0	0	0	0	0	0	0	0	0	0	k__Bacteria	p__Acidobacteria	c__Acidobacteria-6	o__iii1-15	f__unidentified_iii1-15	g__unidentified_iii1-15	s__unidentified_iii1-15	New.CleanUp.ReferenceOTU127870
OTU32696	0	1	1	0	0	0	0	0	0	0	0	0	0	1	0	0	0	0	0	0	0	0	0	0	0	0	0	0	0	0	0	0	0	0	0	0	k__Bacteria	p__Acidobacteria	c__Acidobacteria-6	o__iii1-15	f__unidentified_iii1-15	g__unidentified_iii1-15	s__unidentified_iii1-15	New.CleanUp.ReferenceOTU128009
OTU33795	0	0	0	0	0	0	0	0	0	1	0	0	0	0	0	0	0	0	1	0	0	1	0	0	0	0	0	0	0	0	0	0	0	0	0	0	k__Bacteria	p__Acidobacteria	c__Acidobacteria-6	o__iii1-15	f__unidentified_iii1-15	g__unidentified_iii1-15	s__unidentified_iii1-15	New.CleanUp.ReferenceOTU135358
OTU34762	0	0	0	0	0	0	0	0	0	0	0	0	0	0	0	0	0	0	0	0	1	1	0	0	0	0	0	0	0	0	0	0	1	0	0	0	k__Bacteria	p__Acidobacteria	c__Acidobacteria-6	o__iii1-15	f__unidentified_iii1-15	g__unidentified_iii1-15	s__unidentified_iii1-15	New.CleanUp.ReferenceOTU141643
OTU35905	0	0	2	1	0	0	0	0	0	0	0	0	0	0	0	0	0	0	0	0	0	0	0	0	0	0	0	0	0	0	0	0	0	0	0	0	k__Bacteria	p__Acidobacteria	c__Acidobacteria-6	o__iii1-15	f__unidentified_iii1-15	g__unidentified_iii1-15	s__unidentified_iii1-15	New.CleanUp.ReferenceOTU148945
OTU36164	0	0	1	0	0	0	0	0	0	0	0	0	0	1	0	0	0	0	0	1	0	0	0	0	0	0	0	0	0	0	0	0	0	0	0	0	k__Bacteria	p__Acidobacteria	c__Acidobacteria-6	o__iii1-15	f__unidentified_iii1-15	g__unidentified_iii1-15	s__unidentified_iii1-15	New.CleanUp.ReferenceOTU150791
OTU36839	1	0	0	0	0	0	0	0	0	0	0	0	0	0	0	0	0	0	1	1	0	0	0	0	0	0	0	0	0	0	0	0	0	0	0	0	k__Bacteria	p__Acidobacteria	c__Acidobacteria-6	o__iii1-15	f__unidentified_iii1-15	g__unidentified_iii1-15	s__unidentified_iii1-15	New.CleanUp.ReferenceOTU155489
OTU37372	0	0	0	0	0	0	0	0	0	0	0	0	1	0	1	0	0	0	0	1	0	0	0	0	0	0	0	0	0	0	0	0	0	0	0	0	k__Bacteria	p__Acidobacteria	c__Acidobacteria-6	o__iii1-15	f__unidentified_iii1-15	g__unidentified_iii1-15	s__unidentified_iii1-15	New.CleanUp.ReferenceOTU158812
OTU38949	0	0	3	0	0	0	0	0	0	0	0	0	0	0	0	0	0	0	0	0	0	0	0	0	0	0	0	0	0	0	0	0	0	0	0	0	k__Bacteria	p__Acidobacteria	c__Acidobacteria-6	o__iii1-15	f__unidentified_iii1-15	g__unidentified_iii1-15	s__unidentified_iii1-15	New.CleanUp.ReferenceOTU169372
OTU42284	0	0	0	1	0	0	0	0	0	0	0	0	0	0	0	0	1	0	0	0	0	0	0	0	0	0	0	0	0	0	0	0	1	0	0	0	k__Bacteria	p__Acidobacteria	c__Acidobacteria-6	o__iii1-15	f__unidentified_iii1-15	g__unidentified_iii1-15	s__unidentified_iii1-15	New.CleanUp.ReferenceOTU189474
OTU42740	0	0	0	0	0	0	1	0	0	0	0	2	0	0	0	0	0	0	0	0	0	0	0	0	0	0	0	0	0	0	0	0	0	0	0	0	k__Bacteria	p__Acidobacteria	c__Acidobacteria-6	o__iii1-15	f__unidentified_iii1-15	g__unidentified_iii1-15	s__unidentified_iii1-15	New.CleanUp.ReferenceOTU192129
OTU43635	0	0	0	0	0	1	0	0	0	0	0	0	1	0	0	0	0	0	1	0	0	0	0	0	0	0	0	0	0	0	0	0	0	0	0	0	k__Bacteria	p__Acidobacteria	c__Acidobacteria-6	o__iii1-15	f__unidentified_iii1-15	g__unidentified_iii1-15	s__unidentified_iii1-15	New.CleanUp.ReferenceOTU197048
OTU44788	0	0	0	0	0	0	0	0	0	0	0	1	1	0	0	0	0	0	1	0	0	0	0	0	0	0	0	0	0	0	0	0	0	0	0	0	k__Bacteria	p__Acidobacteria	c__Acidobacteria-6	o__iii1-15	f__unidentified_iii1-15	g__unidentified_iii1-15	s__unidentified_iii1-15	New.CleanUp.ReferenceOTU204295
OTU45086	0	0	0	0	0	0	0	0	0	0	0	0	0	1	0	0	0	0	0	0	0	0	0	2	0	0	0	0	0	0	0	0	0	0	0	0	k__Bacteria	p__Acidobacteria	c__Acidobacteria-6	o__iii1-15	f__unidentified_iii1-15	g__unidentified_iii1-15	s__unidentified_iii1-15	New.CleanUp.ReferenceOTU206313
OTU45164	0	0	1	0	0	0	0	0	0	0	0	1	0	0	0	0	0	0	0	1	0	0	0	0	0	0	0	0	0	0	0	0	0	0	0	0	k__Bacteria	p__Acidobacteria	c__Acidobacteria-6	o__iii1-15	f__unidentified_iii1-15	g__unidentified_iii1-15	s__unidentified_iii1-15	New.CleanUp.ReferenceOTU206815
OTU45771	0	0	1	0	0	0	0	0	0	0	0	1	0	0	1	0	0	0	0	0	0	0	0	0	0	0	0	0	0	0	0	0	0	0	0	0	k__Bacteria	p__Acidobacteria	c__Acidobacteria-6	o__iii1-15	f__unidentified_iii1-15	g__unidentified_iii1-15	s__unidentified_iii1-15	New.CleanUp.ReferenceOTU210427
OTU45958	0	0	1	0	0	0	0	0	0	0	1	0	0	0	0	0	0	0	0	0	1	0	0	0	0	0	0	0	0	0	0	0	0	0	0	0	k__Bacteria	p__Acidobacteria	c__Acidobacteria-6	o__iii1-15	f__unidentified_iii1-15	g__unidentified_iii1-15	s__unidentified_iii1-15	New.CleanUp.ReferenceOTU211454
OTU46789	0	0	0	0	0	0	0	0	0	0	0	0	0	0	1	0	0	0	1	1	0	0	0	0	0	0	0	0	0	0	0	0	0	0	0	0	k__Bacteria	p__Acidobacteria	c__Acidobacteria-6	o__iii1-15	f__unidentified_iii1-15	g__unidentified_iii1-15	s__unidentified_iii1-15	New.CleanUp.ReferenceOTU216704
OTU47278	0	0	0	0	0	0	0	0	0	0	0	0	0	0	0	0	0	1	0	0	0	0	0	0	1	0	1	0	0	0	0	0	0	0	0	0	k__Bacteria	p__Acidobacteria	c__Acidobacteria-6	o__iii1-15	f__unidentified_iii1-15	g__unidentified_iii1-15	s__unidentified_iii1-15	New.CleanUp.ReferenceOTU219610
OTU47327	0	0	0	0	0	0	0	0	0	0	0	0	0	0	0	1	0	0	0	0	0	0	0	2	0	0	0	0	0	0	0	0	0	0	0	0	k__Bacteria	p__Acidobacteria	c__Acidobacteria-6	o__iii1-15	f__unidentified_iii1-15	g__unidentified_iii1-15	s__unidentified_iii1-15	New.CleanUp.ReferenceOTU219869
OTU47861	0	0	0	0	0	0	0	1	1	1	0	0	0	0	0	0	0	0	0	0	0	0	0	0	0	0	0	0	0	0	0	0	0	0	0	0	k__Bacteria	p__Acidobacteria	c__Acidobacteria-6	o__iii1-15	f__unidentified_iii1-15	g__unidentified_iii1-15	s__unidentified_iii1-15	New.CleanUp.ReferenceOTU223217
OTU48438	0	1	0	0	0	0	0	1	0	0	0	0	0	0	0	0	0	0	0	0	1	0	0	0	0	0	0	0	0	0	0	0	0	0	0	0	k__Bacteria	p__Acidobacteria	c__Acidobacteria-6	o__iii1-15	f__unidentified_iii1-15	g__unidentified_iii1-15	s__unidentified_iii1-15	New.CleanUp.ReferenceOTU226815
OTU48829	0	0	1	0	0	0	0	0	0	0	0	0	0	1	0	0	0	0	0	0	0	0	0	1	0	0	0	0	0	0	0	0	0	0	0	0	k__Bacteria	p__Acidobacteria	c__Acidobacteria-6	o__iii1-15	f__unidentified_iii1-15	g__unidentified_iii1-15	s__unidentified_iii1-15	New.CleanUp.ReferenceOTU229151
OTU49576	1	0	0	0	0	0	0	0	0	0	0	1	0	1	0	0	0	0	0	0	0	0	0	0	0	0	0	0	0	0	0	0	0	0	0	0	k__Bacteria	p__Acidobacteria	c__Acidobacteria-6	o__iii1-15	f__unidentified_iii1-15	g__unidentified_iii1-15	s__unidentified_iii1-15	New.CleanUp.ReferenceOTU233703
OTU50345	0	0	0	0	0	0	0	0	1	0	1	0	1	0	0	0	0	0	0	0	0	0	0	0	0	0	0	0	0	0	0	0	0	0	0	0	k__Bacteria	p__Acidobacteria	c__Acidobacteria-6	o__iii1-15	f__unidentified_iii1-15	g__unidentified_iii1-15	s__unidentified_iii1-15	New.CleanUp.ReferenceOTU238619
OTU50828	0	0	0	0	0	0	0	0	0	0	3	0	0	0	0	0	0	0	0	0	0	0	0	0	0	0	0	0	0	0	0	0	0	0	0	0	k__Bacteria	p__Acidobacteria	c__Acidobacteria-6	o__iii1-15	f__unidentified_iii1-15	g__unidentified_iii1-15	s__unidentified_iii1-15	New.CleanUp.ReferenceOTU241580
OTU51704	0	0	0	0	0	0	0	0	0	0	0	0	0	0	1	0	2	0	0	0	0	0	0	0	0	0	0	0	0	0	0	0	0	0	0	0	k__Bacteria	p__Acidobacteria	c__Acidobacteria-6	o__iii1-15	f__unidentified_iii1-15	g__unidentified_iii1-15	s__unidentified_iii1-15	New.CleanUp.ReferenceOTU246958
OTU52409	0	0	0	0	0	0	0	0	1	1	1	0	0	0	0	0	0	0	0	0	0	0	0	0	0	0	0	0	0	0	0	0	0	0	0	0	k__Bacteria	p__Acidobacteria	c__Acidobacteria-6	o__iii1-15	f__unidentified_iii1-15	g__unidentified_iii1-15	s__unidentified_iii1-15	New.CleanUp.ReferenceOTU251193
OTU53514	0	0	0	1	0	0	0	1	0	0	1	0	0	0	0	0	0	0	0	0	0	0	0	0	0	0	0	0	0	0	0	0	0	0	0	0	k__Bacteria	p__Acidobacteria	c__Acidobacteria-6	o__iii1-15	f__unidentified_iii1-15	g__unidentified_iii1-15	s__unidentified_iii1-15	New.CleanUp.ReferenceOTU257875
OTU54630	1	0	1	0	0	0	0	0	0	0	0	0	1	0	0	0	0	0	0	0	0	0	0	0	0	0	0	0	0	0	0	0	0	0	0	0	k__Bacteria	p__Acidobacteria	c__Acidobacteria-6	o__iii1-15	f__unidentified_iii1-15	g__unidentified_iii1-15	s__unidentified_iii1-15	New.CleanUp.ReferenceOTU265228
OTU54670	0	0	0	0	0	0	0	0	0	0	0	0	0	0	0	0	0	0	0	0	1	2	0	0	0	0	0	0	0	0	0	0	0	0	0	0	k__Bacteria	p__Acidobacteria	c__Acidobacteria-6	o__iii1-15	f__unidentified_iii1-15	g__unidentified_iii1-15	s__unidentified_iii1-15	New.CleanUp.ReferenceOTU265503
OTU54764	0	0	0	0	0	0	0	0	1	0	1	0	0	0	0	0	1	0	0	0	0	0	0	0	0	0	0	0	0	0	0	0	0	0	0	0	k__Bacteria	p__Acidobacteria	c__Acidobacteria-6	o__iii1-15	f__unidentified_iii1-15	g__unidentified_iii1-15	s__unidentified_iii1-15	New.CleanUp.ReferenceOTU266230
OTU55081	0	0	0	0	0	0	0	2	0	0	0	0	0	0	0	0	1	0	0	0	0	0	0	0	0	0	0	0	0	0	0	0	0	0	0	0	k__Bacteria	p__Acidobacteria	c__Acidobacteria-6	o__iii1-15	f__unidentified_iii1-15	g__unidentified_iii1-15	s__unidentified_iii1-15	New.CleanUp.ReferenceOTU268229
OTU56003	0	0	0	0	0	0	0	1	0	0	0	0	1	0	0	0	0	0	0	1	0	0	0	0	0	0	0	0	0	0	0	0	0	0	0	0	k__Bacteria	p__Acidobacteria	c__Acidobacteria-6	o__iii1-15	f__unidentified_iii1-15	g__unidentified_iii1-15	s__unidentified_iii1-15	New.CleanUp.ReferenceOTU273917
OTU56602	1	0	0	0	0	0	0	0	0	0	0	0	0	1	1	0	0	0	0	0	0	0	0	0	0	0	0	0	0	0	0	0	0	0	0	0	k__Bacteria	p__Acidobacteria	c__Acidobacteria-6	o__iii1-15	f__unidentified_iii1-15	g__unidentified_iii1-15	s__unidentified_iii1-15	New.CleanUp.ReferenceOTU277883
OTU56893	0	0	0	0	0	0	0	0	0	0	0	0	0	2	0	0	0	0	0	0	1	0	0	0	0	0	0	0	0	0	0	0	0	0	0	0	k__Bacteria	p__Acidobacteria	c__Acidobacteria-6	o__iii1-15	f__unidentified_iii1-15	g__unidentified_iii1-15	s__unidentified_iii1-15	New.CleanUp.ReferenceOTU279561
OTU57335	1	0	0	0	0	0	0	1	0	0	0	0	0	0	0	0	1	0	0	0	0	0	0	0	0	0	0	0	0	0	0	0	0	0	0	0	k__Bacteria	p__Acidobacteria	c__Acidobacteria-6	o__iii1-15	f__unidentified_iii1-15	g__unidentified_iii1-15	s__unidentified_iii1-15	New.CleanUp.ReferenceOTU282137
OTU57489	0	0	0	1	0	0	0	0	0	1	1	0	0	0	0	0	0	0	0	0	0	0	0	0	0	0	0	0	0	0	0	0	0	0	0	0	k__Bacteria	p__Acidobacteria	c__Acidobacteria-6	o__iii1-15	f__unidentified_iii1-15	g__unidentified_iii1-15	s__unidentified_iii1-15	New.CleanUp.ReferenceOTU282997
OTU57628	0	0	0	0	0	0	0	0	0	0	0	0	0	0	0	3	0	0	0	0	0	0	0	0	0	0	0	0	0	0	0	0	0	0	0	0	k__Bacteria	p__Acidobacteria	c__Acidobacteria-6	o__iii1-15	f__unidentified_iii1-15	g__unidentified_iii1-15	s__unidentified_iii1-15	New.CleanUp.ReferenceOTU283891
OTU58426	0	1	1	0	0	0	0	0	0	0	0	0	0	0	0	1	0	0	0	0	0	0	0	0	0	0	0	0	0	0	0	0	0	0	0	0	k__Bacteria	p__Acidobacteria	c__Acidobacteria-6	o__iii1-15	f__unidentified_iii1-15	g__unidentified_iii1-15	s__unidentified_iii1-15	New.CleanUp.ReferenceOTU288702
OTU59281	0	0	0	0	0	0	0	0	0	0	0	0	0	0	0	0	1	0	0	0	0	0	1	0	0	0	0	0	0	0	0	0	1	0	0	0	k__Bacteria	p__Acidobacteria	c__Acidobacteria-6	o__iii1-15	f__unidentified_iii1-15	g__unidentified_iii1-15	s__unidentified_iii1-15	New.CleanUp.ReferenceOTU294166
OTU61310	0	0	0	0	0	0	0	1	0	0	0	0	0	0	0	0	1	0	0	0	0	0	0	0	0	0	0	0	0	0	0	0	0	1	0	0	k__Bacteria	p__Acidobacteria	c__Acidobacteria-6	o__iii1-15	f__unidentified_iii1-15	g__unidentified_iii1-15	s__unidentified_iii1-15	New.CleanUp.ReferenceOTU307104
OTU61368	1	0	0	0	0	0	0	0	0	0	0	0	0	0	0	0	0	0	0	2	0	0	0	0	0	0	0	0	0	0	0	0	0	0	0	0	k__Bacteria	p__Acidobacteria	c__Acidobacteria-6	o__iii1-15	f__unidentified_iii1-15	g__unidentified_iii1-15	s__unidentified_iii1-15	New.CleanUp.ReferenceOTU307435
OTU61372	0	0	0	0	0	0	0	0	0	0	0	0	0	0	1	0	0	0	0	2	0	0	0	0	0	0	0	0	0	0	0	0	0	0	0	0	k__Bacteria	p__Acidobacteria	c__Acidobacteria-6	o__iii1-15	f__unidentified_iii1-15	g__unidentified_iii1-15	s__unidentified_iii1-15	New.CleanUp.ReferenceOTU307446
OTU61701	0	2	0	0	0	0	0	0	0	0	0	1	0	0	0	0	0	0	0	0	0	0	0	0	0	0	0	0	0	0	0	0	0	0	0	0	k__Bacteria	p__Acidobacteria	c__Acidobacteria-6	o__iii1-15	f__unidentified_iii1-15	g__unidentified_iii1-15	s__unidentified_iii1-15	New.CleanUp.ReferenceOTU309617
OTU62010	0	0	1	0	0	0	0	0	0	0	0	0	0	0	0	0	0	0	0	1	1	0	0	0	0	0	0	0	0	0	0	0	0	0	0	0	k__Bacteria	p__Acidobacteria	c__Acidobacteria-6	o__iii1-15	f__unidentified_iii1-15	g__unidentified_iii1-15	s__unidentified_iii1-15	New.CleanUp.ReferenceOTU311582
OTU62289	0	0	0	0	0	0	0	0	0	0	0	0	0	0	0	3	0	0	0	0	0	0	0	0	0	0	0	0	0	0	0	0	0	0	0	0	k__Bacteria	p__Acidobacteria	c__Acidobacteria-6	o__iii1-15	f__unidentified_iii1-15	g__unidentified_iii1-15	s__unidentified_iii1-15	New.CleanUp.ReferenceOTU313316
OTU62717	1	0	1	0	0	0	0	0	0	0	0	1	0	0	0	0	0	0	0	0	0	0	0	0	0	0	0	0	0	0	0	0	0	0	0	0	k__Bacteria	p__Acidobacteria	c__Acidobacteria-6	o__iii1-15	f__unidentified_iii1-15	g__unidentified_iii1-15	s__unidentified_iii1-15	New.CleanUp.ReferenceOTU316076
OTU64465	0	0	0	0	0	0	0	0	0	0	0	0	0	0	0	2	0	1	0	0	0	0	0	0	0	0	0	0	0	0	0	0	0	0	0	0	k__Bacteria	p__Acidobacteria	c__Acidobacteria-6	o__iii1-15	f__unidentified_iii1-15	g__unidentified_iii1-15	s__unidentified_iii1-15	New.CleanUp.ReferenceOTU327541
OTU64992	0	0	2	0	0	0	0	1	0	0	0	0	0	0	0	0	0	0	0	0	0	0	0	0	0	0	0	0	0	0	0	0	0	0	0	0	k__Bacteria	p__Acidobacteria	c__Acidobacteria-6	o__iii1-15	f__unidentified_iii1-15	g__unidentified_iii1-15	s__unidentified_iii1-15	New.CleanUp.ReferenceOTU330997
OTU66648	0	0	0	0	0	0	1	0	0	0	0	0	0	0	0	0	0	0	0	0	0	0	0	0	0	0	0	0	0	0	0	0	0	1	0	1	k__Bacteria	p__Acidobacteria	c__Acidobacteria-6	o__iii1-15	f__unidentified_iii1-15	g__unidentified_iii1-15	s__unidentified_iii1-15	New.CleanUp.ReferenceOTU341928
OTU2211	2	0	0	0	0	0	0	0	0	0	0	0	0	0	0	0	0	0	0	0	0	0	0	0	0	0	0	0	0	0	0	0	0	0	0	0	k__Bacteria	p__Acidobacteria	c__Acidobacteria-6	o__iii1-15	f__unidentified_iii1-15	g__unidentified_iii1-15	s__unidentified_iii1-15	1854
OTU2324	1	0	0	0	0	0	0	0	0	0	0	0	0	0	0	1	0	0	0	0	0	0	0	0	0	0	0	0	0	0	0	0	0	0	0	0	k__Bacteria	p__Acidobacteria	c__Acidobacteria-6	o__iii1-15	f__unidentified_iii1-15	g__unidentified_iii1-15	s__unidentified_iii1-15	3667535
OTU3361	0	0	0	0	0	0	0	0	0	0	0	0	1	0	1	0	0	0	0	0	0	0	0	0	0	0	0	0	0	0	0	0	0	0	0	0	k__Bacteria	p__Acidobacteria	c__Acidobacteria-6	o__iii1-15	f__unidentified_iii1-15	g__unidentified_iii1-15	s__unidentified_iii1-15	254729
OTU3939	0	0	0	0	0	0	0	0	0	0	0	0	0	0	0	2	0	0	0	0	0	0	0	0	0	0	0	0	0	0	0	0	0	0	0	0	k__Bacteria	p__Acidobacteria	c__Acidobacteria-6	o__iii1-15	f__unidentified_iii1-15	g__unidentified_iii1-15	s__unidentified_iii1-15	1554346
OTU4178	0	0	0	0	0	0	0	0	0	0	0	2	0	0	0	0	0	0	0	0	0	0	0	0	0	0	0	0	0	0	0	0	0	0	0	0	k__Bacteria	p__Acidobacteria	c__Acidobacteria-6	o__iii1-15	f__unidentified_iii1-15	g__unidentified_iii1-15	s__unidentified_iii1-15	4308299
OTU4358	0	0	0	0	0	0	0	0	0	0	0	0	0	0	1	0	0	0	0	0	0	0	0	1	0	0	0	0	0	0	0	0	0	0	0	0	k__Bacteria	p__Acidobacteria	c__Acidobacteria-6	o__iii1-15	f__unidentified_iii1-15	g__unidentified_iii1-15	s__unidentified_iii1-15	557097
OTU4690	0	0	0	0	0	0	0	0	0	0	0	0	0	0	0	0	0	0	0	0	0	0	0	0	0	2	0	0	0	0	0	0	0	0	0	0	k__Bacteria	p__Acidobacteria	c__Acidobacteria-6	o__iii1-15	f__unidentified_iii1-15	g__unidentified_iii1-15	s__unidentified_iii1-15	4325612
OTU7516	0	0	0	0	0	0	0	0	0	0	0	0	0	0	0	0	0	0	0	0	0	0	0	2	0	0	0	0	0	0	0	0	0	0	0	0	k__Bacteria	p__Acidobacteria	c__Acidobacteria-6	o__iii1-15	f__unidentified_iii1-15	g__unidentified_iii1-15	s__unidentified_iii1-15	585398
OTU8702	0	0	0	0	0	0	0	0	0	0	0	0	0	0	0	2	0	0	0	0	0	0	0	0	0	0	0	0	0	0	0	0	0	0	0	0	k__Bacteria	p__Acidobacteria	c__Acidobacteria-6	o__iii1-15	f__unidentified_iii1-15	g__unidentified_iii1-15	s__unidentified_iii1-15	4115545
OTU9912	0	0	0	0	0	0	0	0	0	0	0	0	0	1	1	0	0	0	0	0	0	0	0	0	0	0	0	0	0	0	0	0	0	0	0	0	k__Bacteria	p__Acidobacteria	c__Acidobacteria-6	o__iii1-15	f__unidentified_iii1-15	g__unidentified_iii1-15	s__unidentified_iii1-15	4429026
OTU10310	0	0	0	0	0	0	0	0	0	0	2	0	0	0	0	0	0	0	0	0	0	0	0	0	0	0	0	0	0	0	0	0	0	0	0	0	k__Bacteria	p__Acidobacteria	c__Acidobacteria-6	o__iii1-15	f__unidentified_iii1-15	g__unidentified_iii1-15	s__unidentified_iii1-15	1126447
OTU11895	0	0	0	0	0	0	0	0	0	0	0	0	0	0	0	0	0	0	0	0	0	0	2	0	0	0	0	0	0	0	0	0	0	0	0	0	k__Bacteria	p__Acidobacteria	c__Acidobacteria-6	o__iii1-15	f__unidentified_iii1-15	g__unidentified_iii1-15	s__unidentified_iii1-15	New.ReferenceOTU960
OTU12758	1	0	0	0	0	0	0	0	0	0	0	0	0	0	1	0	0	0	0	0	0	0	0	0	0	0	0	0	0	0	0	0	0	0	0	0	k__Bacteria	p__Acidobacteria	c__Acidobacteria-6	o__iii1-15	f__unidentified_iii1-15	g__unidentified_iii1-15	s__unidentified_iii1-15	New.CleanUp.ReferenceOTU2125
OTU13374	0	0	0	0	0	0	0	0	0	0	0	0	0	0	1	0	0	0	1	0	0	0	0	0	0	0	0	0	0	0	0	0	0	0	0	0	k__Bacteria	p__Acidobacteria	c__Acidobacteria-6	o__iii1-15	f__unidentified_iii1-15	g__unidentified_iii1-15	s__unidentified_iii1-15	New.CleanUp.ReferenceOTU5810
OTU13443	0	0	1	0	0	0	0	0	0	0	0	0	0	0	1	0	0	0	0	0	0	0	0	0	0	0	0	0	0	0	0	0	0	0	0	0	k__Bacteria	p__Acidobacteria	c__Acidobacteria-6	o__iii1-15	f__unidentified_iii1-15	g__unidentified_iii1-15	s__unidentified_iii1-15	New.CleanUp.ReferenceOTU6267
OTU13867	0	0	0	0	0	0	0	0	0	0	0	1	0	0	0	0	0	0	0	1	0	0	0	0	0	0	0	0	0	0	0	0	0	0	0	0	k__Bacteria	p__Acidobacteria	c__Acidobacteria-6	o__iii1-15	f__unidentified_iii1-15	g__unidentified_iii1-15	s__unidentified_iii1-15	New.CleanUp.ReferenceOTU8913
OTU13977	0	0	0	0	0	0	0	1	1	0	0	0	0	0	0	0	0	0	0	0	0	0	0	0	0	0	0	0	0	0	0	0	0	0	0	0	k__Bacteria	p__Acidobacteria	c__Acidobacteria-6	o__iii1-15	f__unidentified_iii1-15	g__unidentified_iii1-15	s__unidentified_iii1-15	New.CleanUp.ReferenceOTU9616
OTU14024	0	2	0	0	0	0	0	0	0	0	0	0	0	0	0	0	0	0	0	0	0	0	0	0	0	0	0	0	0	0	0	0	0	0	0	0	k__Bacteria	p__Acidobacteria	c__Acidobacteria-6	o__iii1-15	f__unidentified_iii1-15	g__unidentified_iii1-15	s__unidentified_iii1-15	New.CleanUp.ReferenceOTU9906
OTU14031	0	0	0	0	0	0	0	0	0	0	0	0	0	0	0	0	0	0	0	0	2	0	0	0	0	0	0	0	0	0	0	0	0	0	0	0	k__Bacteria	p__Acidobacteria	c__Acidobacteria-6	o__iii1-15	f__unidentified_iii1-15	g__unidentified_iii1-15	s__unidentified_iii1-15	New.CleanUp.ReferenceOTU10005
OTU14307	0	0	0	0	0	0	0	0	0	0	0	0	0	0	0	0	0	0	1	1	0	0	0	0	0	0	0	0	0	0	0	0	0	0	0	0	k__Bacteria	p__Acidobacteria	c__Acidobacteria-6	o__iii1-15	f__unidentified_iii1-15	g__unidentified_iii1-15	s__unidentified_iii1-15	New.CleanUp.ReferenceOTU11606
OTU14375	1	1	0	0	0	0	0	0	0	0	0	0	0	0	0	0	0	0	0	0	0	0	0	0	0	0	0	0	0	0	0	0	0	0	0	0	k__Bacteria	p__Acidobacteria	c__Acidobacteria-6	o__iii1-15	f__unidentified_iii1-15	g__unidentified_iii1-15	s__unidentified_iii1-15	New.CleanUp.ReferenceOTU12051
OTU14566	0	0	1	0	0	0	0	0	0	0	0	0	0	0	0	0	0	0	0	0	0	0	1	0	0	0	0	0	0	0	0	0	0	0	0	0	k__Bacteria	p__Acidobacteria	c__Acidobacteria-6	o__iii1-15	f__unidentified_iii1-15	g__unidentified_iii1-15	s__unidentified_iii1-15	New.CleanUp.ReferenceOTU13322
OTU14612	0	0	0	0	0	0	0	0	0	0	0	0	0	0	0	0	0	0	0	0	0	0	0	2	0	0	0	0	0	0	0	0	0	0	0	0	k__Bacteria	p__Acidobacteria	c__Acidobacteria-6	o__iii1-15	f__unidentified_iii1-15	g__unidentified_iii1-15	s__unidentified_iii1-15	New.CleanUp.ReferenceOTU13658
OTU15004	1	0	0	0	0	0	0	1	0	0	0	0	0	0	0	0	0	0	0	0	0	0	0	0	0	0	0	0	0	0	0	0	0	0	0	0	k__Bacteria	p__Acidobacteria	c__Acidobacteria-6	o__iii1-15	f__unidentified_iii1-15	g__unidentified_iii1-15	s__unidentified_iii1-15	New.CleanUp.ReferenceOTU15765
OTU15230	0	0	0	0	0	0	0	0	0	0	0	0	0	0	0	2	0	0	0	0	0	0	0	0	0	0	0	0	0	0	0	0	0	0	0	0	k__Bacteria	p__Acidobacteria	c__Acidobacteria-6	o__iii1-15	f__unidentified_iii1-15	g__unidentified_iii1-15	s__unidentified_iii1-15	New.CleanUp.ReferenceOTU17100
OTU15242	0	1	0	0	0	0	1	0	0	0	0	0	0	0	0	0	0	0	0	0	0	0	0	0	0	0	0	0	0	0	0	0	0	0	0	0	k__Bacteria	p__Acidobacteria	c__Acidobacteria-6	o__iii1-15	f__unidentified_iii1-15	g__unidentified_iii1-15	s__unidentified_iii1-15	New.CleanUp.ReferenceOTU17180
OTU15370	0	0	0	0	0	0	0	0	0	0	0	0	0	0	0	0	0	0	0	0	0	0	0	2	0	0	0	0	0	0	0	0	0	0	0	0	k__Bacteria	p__Acidobacteria	c__Acidobacteria-6	o__iii1-15	f__unidentified_iii1-15	g__unidentified_iii1-15	s__unidentified_iii1-15	New.CleanUp.ReferenceOTU17953
OTU15372	2	0	0	0	0	0	0	0	0	0	0	0	0	0	0	0	0	0	0	0	0	0	0	0	0	0	0	0	0	0	0	0	0	0	0	0	k__Bacteria	p__Acidobacteria	c__Acidobacteria-6	o__iii1-15	f__unidentified_iii1-15	g__unidentified_iii1-15	s__unidentified_iii1-15	New.CleanUp.ReferenceOTU17961
OTU15441	1	0	0	0	0	0	0	0	0	0	0	0	0	1	0	0	0	0	0	0	0	0	0	0	0	0	0	0	0	0	0	0	0	0	0	0	k__Bacteria	p__Acidobacteria	c__Acidobacteria-6	o__iii1-15	f__unidentified_iii1-15	g__unidentified_iii1-15	s__unidentified_iii1-15	New.CleanUp.ReferenceOTU18404
OTU15697	0	0	0	0	0	0	0	0	0	0	0	0	0	0	0	1	0	0	0	0	0	0	0	1	0	0	0	0	0	0	0	0	0	0	0	0	k__Bacteria	p__Acidobacteria	c__Acidobacteria-6	o__iii1-15	f__unidentified_iii1-15	g__unidentified_iii1-15	s__unidentified_iii1-15	New.CleanUp.ReferenceOTU20110
OTU16131	0	0	0	0	0	0	0	0	0	0	0	0	0	0	0	1	0	0	0	0	0	0	0	1	0	0	0	0	0	0	0	0	0	0	0	0	k__Bacteria	p__Acidobacteria	c__Acidobacteria-6	o__iii1-15	f__unidentified_iii1-15	g__unidentified_iii1-15	s__unidentified_iii1-15	New.CleanUp.ReferenceOTU22456
OTU16171	0	0	0	0	0	0	0	0	0	0	0	0	0	0	0	2	0	0	0	0	0	0	0	0	0	0	0	0	0	0	0	0	0	0	0	0	k__Bacteria	p__Acidobacteria	c__Acidobacteria-6	o__iii1-15	f__unidentified_iii1-15	g__unidentified_iii1-15	s__unidentified_iii1-15	New.CleanUp.ReferenceOTU22691
OTU16520	0	0	0	0	0	0	0	0	0	0	0	0	0	0	1	0	0	0	0	0	0	1	0	0	0	0	0	0	0	0	0	0	0	0	0	0	k__Bacteria	p__Acidobacteria	c__Acidobacteria-6	o__iii1-15	f__unidentified_iii1-15	g__unidentified_iii1-15	s__unidentified_iii1-15	New.CleanUp.ReferenceOTU24836
OTU16652	0	0	0	0	0	0	0	0	0	0	0	0	0	0	0	0	0	0	0	0	0	0	1	0	0	1	0	0	0	0	0	0	0	0	0	0	k__Bacteria	p__Acidobacteria	c__Acidobacteria-6	o__iii1-15	f__unidentified_iii1-15	g__unidentified_iii1-15	s__unidentified_iii1-15	New.CleanUp.ReferenceOTU25649
OTU16911	1	0	1	0	0	0	0	0	0	0	0	0	0	0	0	0	0	0	0	0	0	0	0	0	0	0	0	0	0	0	0	0	0	0	0	0	k__Bacteria	p__Acidobacteria	c__Acidobacteria-6	o__iii1-15	f__unidentified_iii1-15	g__unidentified_iii1-15	s__unidentified_iii1-15	New.CleanUp.ReferenceOTU27332
OTU18010	1	0	1	0	0	0	0	0	0	0	0	0	0	0	0	0	0	0	0	0	0	0	0	0	0	0	0	0	0	0	0	0	0	0	0	0	k__Bacteria	p__Acidobacteria	c__Acidobacteria-6	o__iii1-15	f__unidentified_iii1-15	g__unidentified_iii1-15	s__unidentified_iii1-15	New.CleanUp.ReferenceOTU34022
OTU18636	0	1	0	0	0	0	0	0	0	0	0	0	0	0	0	0	0	0	0	1	0	0	0	0	0	0	0	0	0	0	0	0	0	0	0	0	k__Bacteria	p__Acidobacteria	c__Acidobacteria-6	o__iii1-15	f__unidentified_iii1-15	g__unidentified_iii1-15	s__unidentified_iii1-15	New.CleanUp.ReferenceOTU37887
OTU18647	0	0	0	0	0	0	0	0	0	0	0	0	0	1	0	0	0	0	0	0	0	1	0	0	0	0	0	0	0	0	0	0	0	0	0	0	k__Bacteria	p__Acidobacteria	c__Acidobacteria-6	o__iii1-15	f__unidentified_iii1-15	g__unidentified_iii1-15	s__unidentified_iii1-15	New.CleanUp.ReferenceOTU37924
OTU18831	0	0	0	1	0	0	0	0	0	1	0	0	0	0	0	0	0	0	0	0	0	0	0	0	0	0	0	0	0	0	0	0	0	0	0	0	k__Bacteria	p__Acidobacteria	c__Acidobacteria-6	o__iii1-15	f__unidentified_iii1-15	g__unidentified_iii1-15	s__unidentified_iii1-15	New.CleanUp.ReferenceOTU39148
OTU18877	0	0	1	0	0	0	0	0	0	0	0	0	0	0	0	0	0	0	1	0	0	0	0	0	0	0	0	0	0	0	0	0	0	0	0	0	k__Bacteria	p__Acidobacteria	c__Acidobacteria-6	o__iii1-15	f__unidentified_iii1-15	g__unidentified_iii1-15	s__unidentified_iii1-15	New.CleanUp.ReferenceOTU39396
OTU19333	0	0	0	0	0	0	0	0	0	0	0	0	0	0	1	1	0	0	0	0	0	0	0	0	0	0	0	0	0	0	0	0	0	0	0	0	k__Bacteria	p__Acidobacteria	c__Acidobacteria-6	o__iii1-15	f__unidentified_iii1-15	g__unidentified_iii1-15	s__unidentified_iii1-15	New.CleanUp.ReferenceOTU42122
OTU20051	0	0	0	0	0	0	0	0	0	0	0	0	0	1	1	0	0	0	0	0	0	0	0	0	0	0	0	0	0	0	0	0	0	0	0	0	k__Bacteria	p__Acidobacteria	c__Acidobacteria-6	o__iii1-15	f__unidentified_iii1-15	g__unidentified_iii1-15	s__unidentified_iii1-15	New.CleanUp.ReferenceOTU46560
OTU20073	0	0	0	1	0	0	1	0	0	0	0	0	0	0	0	0	0	0	0	0	0	0	0	0	0	0	0	0	0	0	0	0	0	0	0	0	k__Bacteria	p__Acidobacteria	c__Acidobacteria-6	o__iii1-15	f__unidentified_iii1-15	g__unidentified_iii1-15	s__unidentified_iii1-15	New.CleanUp.ReferenceOTU46702
OTU20468	0	0	2	0	0	0	0	0	0	0	0	0	0	0	0	0	0	0	0	0	0	0	0	0	0	0	0	0	0	0	0	0	0	0	0	0	k__Bacteria	p__Acidobacteria	c__Acidobacteria-6	o__iii1-15	f__unidentified_iii1-15	g__unidentified_iii1-15	s__unidentified_iii1-15	New.CleanUp.ReferenceOTU49189
OTU21436	0	0	1	0	0	0	0	0	0	0	0	0	0	0	0	0	0	0	0	1	0	0	0	0	0	0	0	0	0	0	0	0	0	0	0	0	k__Bacteria	p__Acidobacteria	c__Acidobacteria-6	o__iii1-15	f__unidentified_iii1-15	g__unidentified_iii1-15	s__unidentified_iii1-15	New.CleanUp.ReferenceOTU55140
OTU21453	0	0	0	0	0	0	0	0	0	0	0	0	1	0	0	0	0	0	0	0	1	0	0	0	0	0	0	0	0	0	0	0	0	0	0	0	k__Bacteria	p__Acidobacteria	c__Acidobacteria-6	o__iii1-15	f__unidentified_iii1-15	g__unidentified_iii1-15	s__unidentified_iii1-15	New.CleanUp.ReferenceOTU55234
OTU21918	0	0	1	0	0	0	0	0	0	0	0	0	0	0	1	0	0	0	0	0	0	0	0	0	0	0	0	0	0	0	0	0	0	0	0	0	k__Bacteria	p__Acidobacteria	c__Acidobacteria-6	o__iii1-15	f__unidentified_iii1-15	g__unidentified_iii1-15	s__unidentified_iii1-15	New.CleanUp.ReferenceOTU58126
OTU21998	0	0	0	0	0	0	0	0	0	0	0	0	0	1	0	1	0	0	0	0	0	0	0	0	0	0	0	0	0	0	0	0	0	0	0	0	k__Bacteria	p__Acidobacteria	c__Acidobacteria-6	o__iii1-15	f__unidentified_iii1-15	g__unidentified_iii1-15	s__unidentified_iii1-15	New.CleanUp.ReferenceOTU58627
OTU22006	0	0	0	0	0	0	0	0	0	0	0	0	0	0	1	0	0	0	1	0	0	0	0	0	0	0	0	0	0	0	0	0	0	0	0	0	k__Bacteria	p__Acidobacteria	c__Acidobacteria-6	o__iii1-15	f__unidentified_iii1-15	g__unidentified_iii1-15	s__unidentified_iii1-15	New.CleanUp.ReferenceOTU58660
OTU22132	0	0	0	0	0	0	0	1	0	0	0	0	0	0	0	0	0	0	0	0	1	0	0	0	0	0	0	0	0	0	0	0	0	0	0	0	k__Bacteria	p__Acidobacteria	c__Acidobacteria-6	o__iii1-15	f__unidentified_iii1-15	g__unidentified_iii1-15	s__unidentified_iii1-15	New.CleanUp.ReferenceOTU59469
OTU22336	0	0	0	0	0	0	0	0	0	0	0	1	0	0	0	0	0	0	0	0	1	0	0	0	0	0	0	0	0	0	0	0	0	0	0	0	k__Bacteria	p__Acidobacteria	c__Acidobacteria-6	o__iii1-15	f__unidentified_iii1-15	g__unidentified_iii1-15	s__unidentified_iii1-15	New.CleanUp.ReferenceOTU60798
OTU22551	0	0	0	0	0	0	0	0	0	0	0	0	0	0	1	1	0	0	0	0	0	0	0	0	0	0	0	0	0	0	0	0	0	0	0	0	k__Bacteria	p__Acidobacteria	c__Acidobacteria-6	o__iii1-15	f__unidentified_iii1-15	g__unidentified_iii1-15	s__unidentified_iii1-15	New.CleanUp.ReferenceOTU62102
OTU22711	0	0	0	0	0	0	0	0	0	0	0	1	0	0	1	0	0	0	0	0	0	0	0	0	0	0	0	0	0	0	0	0	0	0	0	0	k__Bacteria	p__Acidobacteria	c__Acidobacteria-6	o__iii1-15	f__unidentified_iii1-15	g__unidentified_iii1-15	s__unidentified_iii1-15	New.CleanUp.ReferenceOTU63201
OTU23167	0	0	1	0	0	0	0	0	0	0	0	0	1	0	0	0	0	0	0	0	0	0	0	0	0	0	0	0	0	0	0	0	0	0	0	0	k__Bacteria	p__Acidobacteria	c__Acidobacteria-6	o__iii1-15	f__unidentified_iii1-15	g__unidentified_iii1-15	s__unidentified_iii1-15	New.CleanUp.ReferenceOTU66220
OTU23354	0	0	0	0	0	0	0	0	0	0	0	0	0	0	1	0	0	0	0	0	1	0	0	0	0	0	0	0	0	0	0	0	0	0	0	0	k__Bacteria	p__Acidobacteria	c__Acidobacteria-6	o__iii1-15	f__unidentified_iii1-15	g__unidentified_iii1-15	s__unidentified_iii1-15	New.CleanUp.ReferenceOTU67327
OTU23629	0	0	0	0	0	0	2	0	0	0	0	0	0	0	0	0	0	0	0	0	0	0	0	0	0	0	0	0	0	0	0	0	0	0	0	0	k__Bacteria	p__Acidobacteria	c__Acidobacteria-6	o__iii1-15	f__unidentified_iii1-15	g__unidentified_iii1-15	s__unidentified_iii1-15	New.CleanUp.ReferenceOTU69046
OTU24273	0	1	0	0	0	0	0	0	0	0	0	0	0	1	0	0	0	0	0	0	0	0	0	0	0	0	0	0	0	0	0	0	0	0	0	0	k__Bacteria	p__Acidobacteria	c__Acidobacteria-6	o__iii1-15	f__unidentified_iii1-15	g__unidentified_iii1-15	s__unidentified_iii1-15	New.CleanUp.ReferenceOTU73154
OTU24350	1	0	0	0	0	0	0	0	0	0	0	0	0	0	0	1	0	0	0	0	0	0	0	0	0	0	0	0	0	0	0	0	0	0	0	0	k__Bacteria	p__Acidobacteria	c__Acidobacteria-6	o__iii1-15	f__unidentified_iii1-15	g__unidentified_iii1-15	s__unidentified_iii1-15	New.CleanUp.ReferenceOTU73618
OTU24735	0	0	0	0	0	0	0	0	0	0	0	1	0	1	0	0	0	0	0	0	0	0	0	0	0	0	0	0	0	0	0	0	0	0	0	0	k__Bacteria	p__Acidobacteria	c__Acidobacteria-6	o__iii1-15	f__unidentified_iii1-15	g__unidentified_iii1-15	s__unidentified_iii1-15	New.CleanUp.ReferenceOTU76124
OTU24776	0	0	0	0	0	0	0	0	0	0	0	0	1	0	0	0	0	1	0	0	0	0	0	0	0	0	0	0	0	0	0	0	0	0	0	0	k__Bacteria	p__Acidobacteria	c__Acidobacteria-6	o__iii1-15	f__unidentified_iii1-15	g__unidentified_iii1-15	s__unidentified_iii1-15	New.CleanUp.ReferenceOTU76342
OTU25104	0	0	0	0	0	0	0	0	0	0	0	0	0	0	0	0	0	0	1	0	0	0	0	1	0	0	0	0	0	0	0	0	0	0	0	0	k__Bacteria	p__Acidobacteria	c__Acidobacteria-6	o__iii1-15	f__unidentified_iii1-15	g__unidentified_iii1-15	s__unidentified_iii1-15	New.CleanUp.ReferenceOTU78468
OTU25137	0	0	0	0	0	0	0	0	0	0	0	0	0	0	0	1	0	0	0	0	0	0	0	1	0	0	0	0	0	0	0	0	0	0	0	0	k__Bacteria	p__Acidobacteria	c__Acidobacteria-6	o__iii1-15	f__unidentified_iii1-15	g__unidentified_iii1-15	s__unidentified_iii1-15	New.CleanUp.ReferenceOTU78640
OTU25975	0	0	0	0	0	0	0	0	1	0	0	0	0	0	0	0	0	0	0	0	0	0	0	1	0	0	0	0	0	0	0	0	0	0	0	0	k__Bacteria	p__Acidobacteria	c__Acidobacteria-6	o__iii1-15	f__unidentified_iii1-15	g__unidentified_iii1-15	s__unidentified_iii1-15	New.CleanUp.ReferenceOTU84123
OTU25997	0	1	0	0	1	0	0	0	0	0	0	0	0	0	0	0	0	0	0	0	0	0	0	0	0	0	0	0	0	0	0	0	0	0	0	0	k__Bacteria	p__Acidobacteria	c__Acidobacteria-6	o__iii1-15	f__unidentified_iii1-15	g__unidentified_iii1-15	s__unidentified_iii1-15	New.CleanUp.ReferenceOTU84281
OTU26023	0	0	0	0	0	0	0	0	0	0	0	0	0	2	0	0	0	0	0	0	0	0	0	0	0	0	0	0	0	0	0	0	0	0	0	0	k__Bacteria	p__Acidobacteria	c__Acidobacteria-6	o__iii1-15	f__unidentified_iii1-15	g__unidentified_iii1-15	s__unidentified_iii1-15	New.CleanUp.ReferenceOTU84417
OTU26118	0	0	0	1	0	0	0	0	0	0	0	0	0	0	0	0	1	0	0	0	0	0	0	0	0	0	0	0	0	0	0	0	0	0	0	0	k__Bacteria	p__Acidobacteria	c__Acidobacteria-6	o__iii1-15	f__unidentified_iii1-15	g__unidentified_iii1-15	s__unidentified_iii1-15	New.CleanUp.ReferenceOTU85047
OTU26366	1	0	0	0	0	0	0	0	0	0	0	0	0	0	0	1	0	0	0	0	0	0	0	0	0	0	0	0	0	0	0	0	0	0	0	0	k__Bacteria	p__Acidobacteria	c__Acidobacteria-6	o__iii1-15	f__unidentified_iii1-15	g__unidentified_iii1-15	s__unidentified_iii1-15	New.CleanUp.ReferenceOTU86693
OTU26388	0	0	0	0	0	0	0	0	0	0	0	2	0	0	0	0	0	0	0	0	0	0	0	0	0	0	0	0	0	0	0	0	0	0	0	0	k__Bacteria	p__Acidobacteria	c__Acidobacteria-6	o__iii1-15	f__unidentified_iii1-15	g__unidentified_iii1-15	s__unidentified_iii1-15	New.CleanUp.ReferenceOTU86812
OTU26437	1	0	0	0	0	0	0	0	0	0	0	0	0	1	0	0	0	0	0	0	0	0	0	0	0	0	0	0	0	0	0	0	0	0	0	0	k__Bacteria	p__Acidobacteria	c__Acidobacteria-6	o__iii1-15	f__unidentified_iii1-15	g__unidentified_iii1-15	s__unidentified_iii1-15	New.CleanUp.ReferenceOTU87206
OTU26573	0	0	0	0	0	0	0	0	1	0	0	1	0	0	0	0	0	0	0	0	0	0	0	0	0	0	0	0	0	0	0	0	0	0	0	0	k__Bacteria	p__Acidobacteria	c__Acidobacteria-6	o__iii1-15	f__unidentified_iii1-15	g__unidentified_iii1-15	s__unidentified_iii1-15	New.CleanUp.ReferenceOTU88044
OTU26607	0	0	0	0	0	0	0	0	0	0	0	0	1	0	0	0	0	0	1	0	0	0	0	0	0	0	0	0	0	0	0	0	0	0	0	0	k__Bacteria	p__Acidobacteria	c__Acidobacteria-6	o__iii1-15	f__unidentified_iii1-15	g__unidentified_iii1-15	s__unidentified_iii1-15	New.CleanUp.ReferenceOTU88202
OTU26694	0	1	0	0	0	0	0	0	0	0	0	1	0	0	0	0	0	0	0	0	0	0	0	0	0	0	0	0	0	0	0	0	0	0	0	0	k__Bacteria	p__Acidobacteria	c__Acidobacteria-6	o__iii1-15	f__unidentified_iii1-15	g__unidentified_iii1-15	s__unidentified_iii1-15	New.CleanUp.ReferenceOTU88822
OTU26760	0	0	0	0	0	0	0	0	0	0	0	0	0	0	0	0	0	0	0	0	1	0	0	0	0	0	0	0	0	0	0	0	0	1	0	0	k__Bacteria	p__Acidobacteria	c__Acidobacteria-6	o__iii1-15	f__unidentified_iii1-15	g__unidentified_iii1-15	s__unidentified_iii1-15	New.CleanUp.ReferenceOTU89252
OTU26994	1	0	0	0	0	0	0	0	0	0	0	0	0	0	0	0	0	0	0	0	0	0	0	1	0	0	0	0	0	0	0	0	0	0	0	0	k__Bacteria	p__Acidobacteria	c__Acidobacteria-6	o__iii1-15	f__unidentified_iii1-15	g__unidentified_iii1-15	s__unidentified_iii1-15	New.CleanUp.ReferenceOTU90717
OTU27862	0	0	0	0	0	1	0	0	0	0	1	0	0	0	0	0	0	0	0	0	0	0	0	0	0	0	0	0	0	0	0	0	0	0	0	0	k__Bacteria	p__Acidobacteria	c__Acidobacteria-6	o__iii1-15	f__unidentified_iii1-15	g__unidentified_iii1-15	s__unidentified_iii1-15	New.CleanUp.ReferenceOTU96567
OTU28083	0	0	0	0	0	0	0	0	0	0	0	0	0	1	1	0	0	0	0	0	0	0	0	0	0	0	0	0	0	0	0	0	0	0	0	0	k__Bacteria	p__Acidobacteria	c__Acidobacteria-6	o__iii1-15	f__unidentified_iii1-15	g__unidentified_iii1-15	s__unidentified_iii1-15	New.CleanUp.ReferenceOTU98073
OTU28220	0	0	1	0	0	0	0	0	0	0	0	0	0	0	1	0	0	0	0	0	0	0	0	0	0	0	0	0	0	0	0	0	0	0	0	0	k__Bacteria	p__Acidobacteria	c__Acidobacteria-6	o__iii1-15	f__unidentified_iii1-15	g__unidentified_iii1-15	s__unidentified_iii1-15	New.CleanUp.ReferenceOTU98864
OTU28345	0	0	0	0	0	0	0	1	0	0	0	0	0	0	0	0	0	0	0	0	0	0	0	1	0	0	0	0	0	0	0	0	0	0	0	0	k__Bacteria	p__Acidobacteria	c__Acidobacteria-6	o__iii1-15	f__unidentified_iii1-15	g__unidentified_iii1-15	s__unidentified_iii1-15	New.CleanUp.ReferenceOTU99638
OTU28377	0	0	2	0	0	0	0	0	0	0	0	0	0	0	0	0	0	0	0	0	0	0	0	0	0	0	0	0	0	0	0	0	0	0	0	0	k__Bacteria	p__Acidobacteria	c__Acidobacteria-6	o__iii1-15	f__unidentified_iii1-15	g__unidentified_iii1-15	s__unidentified_iii1-15	New.CleanUp.ReferenceOTU99820
OTU29170	0	0	0	0	0	0	0	0	0	0	0	0	0	1	0	1	0	0	0	0	0	0	0	0	0	0	0	0	0	0	0	0	0	0	0	0	k__Bacteria	p__Acidobacteria	c__Acidobacteria-6	o__iii1-15	f__unidentified_iii1-15	g__unidentified_iii1-15	s__unidentified_iii1-15	New.CleanUp.ReferenceOTU105211
OTU29639	0	0	0	0	0	0	0	0	0	0	0	0	2	0	0	0	0	0	0	0	0	0	0	0	0	0	0	0	0	0	0	0	0	0	0	0	k__Bacteria	p__Acidobacteria	c__Acidobacteria-6	o__iii1-15	f__unidentified_iii1-15	g__unidentified_iii1-15	s__unidentified_iii1-15	New.CleanUp.ReferenceOTU108352
OTU30231	1	0	0	0	0	0	0	0	0	0	1	0	0	0	0	0	0	0	0	0	0	0	0	0	0	0	0	0	0	0	0	0	0	0	0	0	k__Bacteria	p__Acidobacteria	c__Acidobacteria-6	o__iii1-15	f__unidentified_iii1-15	g__unidentified_iii1-15	s__unidentified_iii1-15	New.CleanUp.ReferenceOTU112140
OTU30244	0	0	1	0	0	0	0	0	1	0	0	0	0	0	0	0	0	0	0	0	0	0	0	0	0	0	0	0	0	0	0	0	0	0	0	0	k__Bacteria	p__Acidobacteria	c__Acidobacteria-6	o__iii1-15	f__unidentified_iii1-15	g__unidentified_iii1-15	s__unidentified_iii1-15	New.CleanUp.ReferenceOTU112198
OTU30331	0	0	0	0	0	0	0	0	0	0	0	0	2	0	0	0	0	0	0	0	0	0	0	0	0	0	0	0	0	0	0	0	0	0	0	0	k__Bacteria	p__Acidobacteria	c__Acidobacteria-6	o__iii1-15	f__unidentified_iii1-15	g__unidentified_iii1-15	s__unidentified_iii1-15	New.CleanUp.ReferenceOTU112723
OTU30422	0	0	0	0	0	0	0	0	0	2	0	0	0	0	0	0	0	0	0	0	0	0	0	0	0	0	0	0	0	0	0	0	0	0	0	0	k__Bacteria	p__Acidobacteria	c__Acidobacteria-6	o__iii1-15	f__unidentified_iii1-15	g__unidentified_iii1-15	s__unidentified_iii1-15	New.CleanUp.ReferenceOTU113235
OTU30547	0	0	0	1	0	0	0	0	0	0	0	0	0	0	0	0	0	0	0	1	0	0	0	0	0	0	0	0	0	0	0	0	0	0	0	0	k__Bacteria	p__Acidobacteria	c__Acidobacteria-6	o__iii1-15	f__unidentified_iii1-15	g__unidentified_iii1-15	s__unidentified_iii1-15	New.CleanUp.ReferenceOTU114077
OTU30623	0	2	0	0	0	0	0	0	0	0	0	0	0	0	0	0	0	0	0	0	0	0	0	0	0	0	0	0	0	0	0	0	0	0	0	0	k__Bacteria	p__Acidobacteria	c__Acidobacteria-6	o__iii1-15	f__unidentified_iii1-15	g__unidentified_iii1-15	s__unidentified_iii1-15	New.CleanUp.ReferenceOTU114515
OTU30726	2	0	0	0	0	0	0	0	0	0	0	0	0	0	0	0	0	0	0	0	0	0	0	0	0	0	0	0	0	0	0	0	0	0	0	0	k__Bacteria	p__Acidobacteria	c__Acidobacteria-6	o__iii1-15	f__unidentified_iii1-15	g__unidentified_iii1-15	s__unidentified_iii1-15	New.CleanUp.ReferenceOTU115035
OTU30988	1	0	0	0	0	0	0	0	0	0	0	0	0	0	1	0	0	0	0	0	0	0	0	0	0	0	0	0	0	0	0	0	0	0	0	0	k__Bacteria	p__Acidobacteria	c__Acidobacteria-6	o__iii1-15	f__unidentified_iii1-15	g__unidentified_iii1-15	s__unidentified_iii1-15	New.CleanUp.ReferenceOTU116573
OTU31222	0	0	0	0	0	0	0	0	0	0	0	0	0	0	0	0	1	0	1	0	0	0	0	0	0	0	0	0	0	0	0	0	0	0	0	0	k__Bacteria	p__Acidobacteria	c__Acidobacteria-6	o__iii1-15	f__unidentified_iii1-15	g__unidentified_iii1-15	s__unidentified_iii1-15	New.CleanUp.ReferenceOTU118209
OTU31716	0	0	0	0	0	0	0	0	0	0	0	0	0	0	0	0	0	0	0	0	0	0	0	0	0	0	0	0	0	0	0	0	2	0	0	0	k__Bacteria	p__Acidobacteria	c__Acidobacteria-6	o__iii1-15	f__unidentified_iii1-15	g__unidentified_iii1-15	s__unidentified_iii1-15	New.CleanUp.ReferenceOTU121574
OTU31821	2	0	0	0	0	0	0	0	0	0	0	0	0	0	0	0	0	0	0	0	0	0	0	0	0	0	0	0	0	0	0	0	0	0	0	0	k__Bacteria	p__Acidobacteria	c__Acidobacteria-6	o__iii1-15	f__unidentified_iii1-15	g__unidentified_iii1-15	s__unidentified_iii1-15	New.CleanUp.ReferenceOTU122304
OTU32327	0	0	0	0	0	0	0	0	0	0	0	0	0	0	0	0	0	0	0	0	0	0	0	0	0	0	0	0	0	0	0	0	2	0	0	0	k__Bacteria	p__Acidobacteria	c__Acidobacteria-6	o__iii1-15	f__unidentified_iii1-15	g__unidentified_iii1-15	s__unidentified_iii1-15	New.CleanUp.ReferenceOTU125550
OTU32347	0	1	0	0	1	0	0	0	0	0	0	0	0	0	0	0	0	0	0	0	0	0	0	0	0	0	0	0	0	0	0	0	0	0	0	0	k__Bacteria	p__Acidobacteria	c__Acidobacteria-6	o__iii1-15	f__unidentified_iii1-15	g__unidentified_iii1-15	s__unidentified_iii1-15	New.CleanUp.ReferenceOTU125720
OTU32595	0	0	0	0	0	0	0	0	0	0	0	0	0	0	1	0	0	0	0	0	0	1	0	0	0	0	0	0	0	0	0	0	0	0	0	0	k__Bacteria	p__Acidobacteria	c__Acidobacteria-6	o__iii1-15	f__unidentified_iii1-15	g__unidentified_iii1-15	s__unidentified_iii1-15	New.CleanUp.ReferenceOTU127314
OTU32790	0	0	0	0	0	0	0	0	0	0	0	0	0	0	0	0	0	0	0	0	0	0	0	0	1	0	1	0	0	0	0	0	0	0	0	0	k__Bacteria	p__Acidobacteria	c__Acidobacteria-6	o__iii1-15	f__unidentified_iii1-15	g__unidentified_iii1-15	s__unidentified_iii1-15	New.CleanUp.ReferenceOTU128621
OTU32932	0	1	1	0	0	0	0	0	0	0	0	0	0	0	0	0	0	0	0	0	0	0	0	0	0	0	0	0	0	0	0	0	0	0	0	0	k__Bacteria	p__Acidobacteria	c__Acidobacteria-6	o__iii1-15	f__unidentified_iii1-15	g__unidentified_iii1-15	s__unidentified_iii1-15	New.CleanUp.ReferenceOTU129503
OTU33174	2	0	0	0	0	0	0	0	0	0	0	0	0	0	0	0	0	0	0	0	0	0	0	0	0	0	0	0	0	0	0	0	0	0	0	0	k__Bacteria	p__Acidobacteria	c__Acidobacteria-6	o__iii1-15	f__unidentified_iii1-15	g__unidentified_iii1-15	s__unidentified_iii1-15	New.CleanUp.ReferenceOTU131030
OTU33225	0	0	1	0	0	0	0	0	0	0	0	1	0	0	0	0	0	0	0	0	0	0	0	0	0	0	0	0	0	0	0	0	0	0	0	0	k__Bacteria	p__Acidobacteria	c__Acidobacteria-6	o__iii1-15	f__unidentified_iii1-15	g__unidentified_iii1-15	s__unidentified_iii1-15	New.CleanUp.ReferenceOTU131428
OTU33753	0	1	0	0	0	0	0	0	0	0	0	0	0	0	1	0	0	0	0	0	0	0	0	0	0	0	0	0	0	0	0	0	0	0	0	0	k__Bacteria	p__Acidobacteria	c__Acidobacteria-6	o__iii1-15	f__unidentified_iii1-15	g__unidentified_iii1-15	s__unidentified_iii1-15	New.CleanUp.ReferenceOTU135008
OTU33789	0	0	0	0	0	0	0	0	0	0	0	0	0	0	0	0	0	0	0	0	0	0	0	0	0	0	0	0	0	1	0	0	1	0	0	0	k__Bacteria	p__Acidobacteria	c__Acidobacteria-6	o__iii1-15	f__unidentified_iii1-15	g__unidentified_iii1-15	s__unidentified_iii1-15	New.CleanUp.ReferenceOTU135287
OTU34328	0	0	0	0	0	0	0	0	0	0	0	0	0	0	0	0	0	0	0	0	0	0	0	1	0	0	0	0	0	0	0	0	1	0	0	0	k__Bacteria	p__Acidobacteria	c__Acidobacteria-6	o__iii1-15	f__unidentified_iii1-15	g__unidentified_iii1-15	s__unidentified_iii1-15	New.CleanUp.ReferenceOTU138953
OTU34584	0	0	0	0	0	0	0	0	1	0	0	0	0	0	0	0	1	0	0	0	0	0	0	0	0	0	0	0	0	0	0	0	0	0	0	0	k__Bacteria	p__Acidobacteria	c__Acidobacteria-6	o__iii1-15	f__unidentified_iii1-15	g__unidentified_iii1-15	s__unidentified_iii1-15	New.CleanUp.ReferenceOTU140583
OTU35036	0	0	1	0	0	0	0	0	1	0	0	0	0	0	0	0	0	0	0	0	0	0	0	0	0	0	0	0	0	0	0	0	0	0	0	0	k__Bacteria	p__Acidobacteria	c__Acidobacteria-6	o__iii1-15	f__unidentified_iii1-15	g__unidentified_iii1-15	s__unidentified_iii1-15	New.CleanUp.ReferenceOTU143448
OTU35126	0	0	0	1	0	0	0	0	0	0	0	1	0	0	0	0	0	0	0	0	0	0	0	0	0	0	0	0	0	0	0	0	0	0	0	0	k__Bacteria	p__Acidobacteria	c__Acidobacteria-6	o__iii1-15	f__unidentified_iii1-15	g__unidentified_iii1-15	s__unidentified_iii1-15	New.CleanUp.ReferenceOTU143985
OTU35156	0	0	0	0	0	0	0	0	0	0	0	0	0	1	0	1	0	0	0	0	0	0	0	0	0	0	0	0	0	0	0	0	0	0	0	0	k__Bacteria	p__Acidobacteria	c__Acidobacteria-6	o__iii1-15	f__unidentified_iii1-15	g__unidentified_iii1-15	s__unidentified_iii1-15	New.CleanUp.ReferenceOTU144194
OTU35178	0	0	0	0	0	0	0	0	1	0	0	0	1	0	0	0	0	0	0	0	0	0	0	0	0	0	0	0	0	0	0	0	0	0	0	0	k__Bacteria	p__Acidobacteria	c__Acidobacteria-6	o__iii1-15	f__unidentified_iii1-15	g__unidentified_iii1-15	s__unidentified_iii1-15	New.CleanUp.ReferenceOTU144288
OTU35339	0	0	0	0	0	0	0	0	0	0	0	0	1	0	0	0	0	0	0	0	0	1	0	0	0	0	0	0	0	0	0	0	0	0	0	0	k__Bacteria	p__Acidobacteria	c__Acidobacteria-6	o__iii1-15	f__unidentified_iii1-15	g__unidentified_iii1-15	s__unidentified_iii1-15	New.CleanUp.ReferenceOTU145244
OTU35414	1	1	0	0	0	0	0	0	0	0	0	0	0	0	0	0	0	0	0	0	0	0	0	0	0	0	0	0	0	0	0	0	0	0	0	0	k__Bacteria	p__Acidobacteria	c__Acidobacteria-6	o__iii1-15	f__unidentified_iii1-15	g__unidentified_iii1-15	s__unidentified_iii1-15	New.CleanUp.ReferenceOTU145737
OTU35554	0	0	0	0	0	0	0	2	0	0	0	0	0	0	0	0	0	0	0	0	0	0	0	0	0	0	0	0	0	0	0	0	0	0	0	0	k__Bacteria	p__Acidobacteria	c__Acidobacteria-6	o__iii1-15	f__unidentified_iii1-15	g__unidentified_iii1-15	s__unidentified_iii1-15	New.CleanUp.ReferenceOTU146719
OTU37502	1	0	0	0	0	0	0	0	0	0	0	0	0	0	1	0	0	0	0	0	0	0	0	0	0	0	0	0	0	0	0	0	0	0	0	0	k__Bacteria	p__Acidobacteria	c__Acidobacteria-6	o__iii1-15	f__unidentified_iii1-15	g__unidentified_iii1-15	s__unidentified_iii1-15	New.CleanUp.ReferenceOTU159788
OTU37748	0	1	0	0	0	0	0	0	0	0	0	0	0	0	0	0	0	0	0	1	0	0	0	0	0	0	0	0	0	0	0	0	0	0	0	0	k__Bacteria	p__Acidobacteria	c__Acidobacteria-6	o__iii1-15	f__unidentified_iii1-15	g__unidentified_iii1-15	s__unidentified_iii1-15	New.CleanUp.ReferenceOTU161436
OTU38342	0	0	1	0	0	0	0	1	0	0	0	0	0	0	0	0	0	0	0	0	0	0	0	0	0	0	0	0	0	0	0	0	0	0	0	0	k__Bacteria	p__Acidobacteria	c__Acidobacteria-6	o__iii1-15	f__unidentified_iii1-15	g__unidentified_iii1-15	s__unidentified_iii1-15	New.CleanUp.ReferenceOTU165330
OTU38537	0	0	0	0	0	0	0	0	0	0	0	0	0	1	0	0	0	0	1	0	0	0	0	0	0	0	0	0	0	0	0	0	0	0	0	0	k__Bacteria	p__Acidobacteria	c__Acidobacteria-6	o__iii1-15	f__unidentified_iii1-15	g__unidentified_iii1-15	s__unidentified_iii1-15	New.CleanUp.ReferenceOTU166668
OTU38669	0	0	0	0	0	0	0	0	0	0	0	0	0	1	0	0	0	0	0	0	0	0	0	1	0	0	0	0	0	0	0	0	0	0	0	0	k__Bacteria	p__Acidobacteria	c__Acidobacteria-6	o__iii1-15	f__unidentified_iii1-15	g__unidentified_iii1-15	s__unidentified_iii1-15	New.CleanUp.ReferenceOTU167496
OTU39297	0	0	0	0	0	0	0	0	0	0	0	1	0	0	0	0	0	0	0	1	0	0	0	0	0	0	0	0	0	0	0	0	0	0	0	0	k__Bacteria	p__Acidobacteria	c__Acidobacteria-6	o__iii1-15	f__unidentified_iii1-15	g__unidentified_iii1-15	s__unidentified_iii1-15	New.CleanUp.ReferenceOTU171765
OTU39652	0	0	0	0	0	0	0	0	0	0	0	1	0	0	1	0	0	0	0	0	0	0	0	0	0	0	0	0	0	0	0	0	0	0	0	0	k__Bacteria	p__Acidobacteria	c__Acidobacteria-6	o__iii1-15	f__unidentified_iii1-15	g__unidentified_iii1-15	s__unidentified_iii1-15	New.CleanUp.ReferenceOTU174015
OTU39677	0	0	0	0	0	0	0	0	0	0	0	0	0	0	0	2	0	0	0	0	0	0	0	0	0	0	0	0	0	0	0	0	0	0	0	0	k__Bacteria	p__Acidobacteria	c__Acidobacteria-6	o__iii1-15	f__unidentified_iii1-15	g__unidentified_iii1-15	s__unidentified_iii1-15	New.CleanUp.ReferenceOTU174188
OTU39724	0	0	0	0	1	0	0	0	0	0	0	0	0	0	0	0	0	0	0	0	1	0	0	0	0	0	0	0	0	0	0	0	0	0	0	0	k__Bacteria	p__Acidobacteria	c__Acidobacteria-6	o__iii1-15	f__unidentified_iii1-15	g__unidentified_iii1-15	s__unidentified_iii1-15	New.CleanUp.ReferenceOTU174439
OTU39826	0	0	0	0	1	0	0	0	0	0	0	0	0	0	0	0	1	0	0	0	0	0	0	0	0	0	0	0	0	0	0	0	0	0	0	0	k__Bacteria	p__Acidobacteria	c__Acidobacteria-6	o__iii1-15	f__unidentified_iii1-15	g__unidentified_iii1-15	s__unidentified_iii1-15	New.CleanUp.ReferenceOTU175074
OTU39952	0	0	0	0	0	0	0	0	1	0	0	0	0	0	1	0	0	0	0	0	0	0	0	0	0	0	0	0	0	0	0	0	0	0	0	0	k__Bacteria	p__Acidobacteria	c__Acidobacteria-6	o__iii1-15	f__unidentified_iii1-15	g__unidentified_iii1-15	s__unidentified_iii1-15	New.CleanUp.ReferenceOTU175763
OTU40753	0	1	0	0	0	0	0	0	0	0	0	0	0	0	0	0	0	0	1	0	0	0	0	0	0	0	0	0	0	0	0	0	0	0	0	0	k__Bacteria	p__Acidobacteria	c__Acidobacteria-6	o__iii1-15	f__unidentified_iii1-15	g__unidentified_iii1-15	s__unidentified_iii1-15	New.CleanUp.ReferenceOTU180239
OTU40781	0	0	1	0	0	0	0	0	0	1	0	0	0	0	0	0	0	0	0	0	0	0	0	0	0	0	0	0	0	0	0	0	0	0	0	0	k__Bacteria	p__Acidobacteria	c__Acidobacteria-6	o__iii1-15	f__unidentified_iii1-15	g__unidentified_iii1-15	s__unidentified_iii1-15	New.CleanUp.ReferenceOTU180392
OTU40898	0	0	1	0	0	0	0	0	1	0	0	0	0	0	0	0	0	0	0	0	0	0	0	0	0	0	0	0	0	0	0	0	0	0	0	0	k__Bacteria	p__Acidobacteria	c__Acidobacteria-6	o__iii1-15	f__unidentified_iii1-15	g__unidentified_iii1-15	s__unidentified_iii1-15	New.CleanUp.ReferenceOTU181118
OTU41581	0	1	0	0	0	0	0	0	0	0	0	0	0	0	0	1	0	0	0	0	0	0	0	0	0	0	0	0	0	0	0	0	0	0	0	0	k__Bacteria	p__Acidobacteria	c__Acidobacteria-6	o__iii1-15	f__unidentified_iii1-15	g__unidentified_iii1-15	s__unidentified_iii1-15	New.CleanUp.ReferenceOTU185182
OTU41729	0	0	0	0	0	0	0	0	0	0	0	0	0	1	1	0	0	0	0	0	0	0	0	0	0	0	0	0	0	0	0	0	0	0	0	0	k__Bacteria	p__Acidobacteria	c__Acidobacteria-6	o__iii1-15	f__unidentified_iii1-15	g__unidentified_iii1-15	s__unidentified_iii1-15	New.CleanUp.ReferenceOTU186167
OTU42055	0	0	0	0	0	0	0	0	0	0	0	0	0	0	0	0	0	0	0	0	2	0	0	0	0	0	0	0	0	0	0	0	0	0	0	0	k__Bacteria	p__Acidobacteria	c__Acidobacteria-6	o__iii1-15	f__unidentified_iii1-15	g__unidentified_iii1-15	s__unidentified_iii1-15	New.CleanUp.ReferenceOTU188091
OTU42477	0	0	0	0	0	0	0	0	0	0	0	0	0	1	1	0	0	0	0	0	0	0	0	0	0	0	0	0	0	0	0	0	0	0	0	0	k__Bacteria	p__Acidobacteria	c__Acidobacteria-6	o__iii1-15	f__unidentified_iii1-15	g__unidentified_iii1-15	s__unidentified_iii1-15	New.CleanUp.ReferenceOTU190598
OTU42759	0	0	0	0	0	0	0	0	1	0	0	0	0	0	0	0	0	0	1	0	0	0	0	0	0	0	0	0	0	0	0	0	0	0	0	0	k__Bacteria	p__Acidobacteria	c__Acidobacteria-6	o__iii1-15	f__unidentified_iii1-15	g__unidentified_iii1-15	s__unidentified_iii1-15	New.CleanUp.ReferenceOTU192218
OTU42916	0	0	0	1	0	0	0	0	0	0	0	0	0	0	1	0	0	0	0	0	0	0	0	0	0	0	0	0	0	0	0	0	0	0	0	0	k__Bacteria	p__Acidobacteria	c__Acidobacteria-6	o__iii1-15	f__unidentified_iii1-15	g__unidentified_iii1-15	s__unidentified_iii1-15	New.CleanUp.ReferenceOTU193160
OTU43018	0	0	0	0	0	0	0	0	1	0	0	1	0	0	0	0	0	0	0	0	0	0	0	0	0	0	0	0	0	0	0	0	0	0	0	0	k__Bacteria	p__Acidobacteria	c__Acidobacteria-6	o__iii1-15	f__unidentified_iii1-15	g__unidentified_iii1-15	s__unidentified_iii1-15	New.CleanUp.ReferenceOTU193699
OTU43097	0	0	0	0	0	0	0	0	0	0	0	0	0	0	0	0	1	0	0	0	0	1	0	0	0	0	0	0	0	0	0	0	0	0	0	0	k__Bacteria	p__Acidobacteria	c__Acidobacteria-6	o__iii1-15	f__unidentified_iii1-15	g__unidentified_iii1-15	s__unidentified_iii1-15	New.CleanUp.ReferenceOTU194131
OTU43495	0	0	0	0	0	0	0	0	0	0	0	0	0	0	2	0	0	0	0	0	0	0	0	0	0	0	0	0	0	0	0	0	0	0	0	0	k__Bacteria	p__Acidobacteria	c__Acidobacteria-6	o__iii1-15	f__unidentified_iii1-15	g__unidentified_iii1-15	s__unidentified_iii1-15	New.CleanUp.ReferenceOTU196253
OTU43526	0	0	0	0	0	0	0	0	0	0	0	0	0	0	1	0	0	0	0	0	0	0	0	1	0	0	0	0	0	0	0	0	0	0	0	0	k__Bacteria	p__Acidobacteria	c__Acidobacteria-6	o__iii1-15	f__unidentified_iii1-15	g__unidentified_iii1-15	s__unidentified_iii1-15	New.CleanUp.ReferenceOTU196425
OTU43549	0	0	1	0	0	0	0	0	0	0	0	0	0	0	0	0	0	0	0	1	0	0	0	0	0	0	0	0	0	0	0	0	0	0	0	0	k__Bacteria	p__Acidobacteria	c__Acidobacteria-6	o__iii1-15	f__unidentified_iii1-15	g__unidentified_iii1-15	s__unidentified_iii1-15	New.CleanUp.ReferenceOTU196591
OTU43713	0	0	0	0	0	0	0	1	0	1	0	0	0	0	0	0	0	0	0	0	0	0	0	0	0	0	0	0	0	0	0	0	0	0	0	0	k__Bacteria	p__Acidobacteria	c__Acidobacteria-6	o__iii1-15	f__unidentified_iii1-15	g__unidentified_iii1-15	s__unidentified_iii1-15	New.CleanUp.ReferenceOTU197522
OTU43901	0	0	0	0	0	0	0	0	0	0	1	0	1	0	0	0	0	0	0	0	0	0	0	0	0	0	0	0	0	0	0	0	0	0	0	0	k__Bacteria	p__Acidobacteria	c__Acidobacteria-6	o__iii1-15	f__unidentified_iii1-15	g__unidentified_iii1-15	s__unidentified_iii1-15	New.CleanUp.ReferenceOTU198623
OTU43909	1	0	0	0	0	0	0	0	0	0	0	0	0	0	1	0	0	0	0	0	0	0	0	0	0	0	0	0	0	0	0	0	0	0	0	0	k__Bacteria	p__Acidobacteria	c__Acidobacteria-6	o__iii1-15	f__unidentified_iii1-15	g__unidentified_iii1-15	s__unidentified_iii1-15	New.CleanUp.ReferenceOTU198668
OTU43948	0	0	0	0	0	0	0	0	0	0	0	0	0	0	0	2	0	0	0	0	0	0	0	0	0	0	0	0	0	0	0	0	0	0	0	0	k__Bacteria	p__Acidobacteria	c__Acidobacteria-6	o__iii1-15	f__unidentified_iii1-15	g__unidentified_iii1-15	s__unidentified_iii1-15	New.CleanUp.ReferenceOTU198874
OTU44150	0	0	0	0	0	0	0	0	0	0	0	0	0	0	0	0	0	1	0	0	0	0	0	0	0	0	0	0	0	0	0	0	0	0	0	1	k__Bacteria	p__Acidobacteria	c__Acidobacteria-6	o__iii1-15	f__unidentified_iii1-15	g__unidentified_iii1-15	s__unidentified_iii1-15	New.CleanUp.ReferenceOTU200066
OTU44312	0	0	1	0	0	0	0	0	0	0	0	0	0	0	1	0	0	0	0	0	0	0	0	0	0	0	0	0	0	0	0	0	0	0	0	0	k__Bacteria	p__Acidobacteria	c__Acidobacteria-6	o__iii1-15	f__unidentified_iii1-15	g__unidentified_iii1-15	s__unidentified_iii1-15	New.CleanUp.ReferenceOTU201078
OTU44372	0	0	1	0	0	0	0	0	0	0	0	0	0	0	0	0	1	0	0	0	0	0	0	0	0	0	0	0	0	0	0	0	0	0	0	0	k__Bacteria	p__Acidobacteria	c__Acidobacteria-6	o__iii1-15	f__unidentified_iii1-15	g__unidentified_iii1-15	s__unidentified_iii1-15	New.CleanUp.ReferenceOTU201447
OTU44390	0	0	0	0	0	0	0	0	0	0	0	0	0	0	0	0	1	0	1	0	0	0	0	0	0	0	0	0	0	0	0	0	0	0	0	0	k__Bacteria	p__Acidobacteria	c__Acidobacteria-6	o__iii1-15	f__unidentified_iii1-15	g__unidentified_iii1-15	s__unidentified_iii1-15	New.CleanUp.ReferenceOTU201557
OTU44416	0	0	0	1	0	0	0	0	1	0	0	0	0	0	0	0	0	0	0	0	0	0	0	0	0	0	0	0	0	0	0	0	0	0	0	0	k__Bacteria	p__Acidobacteria	c__Acidobacteria-6	o__iii1-15	f__unidentified_iii1-15	g__unidentified_iii1-15	s__unidentified_iii1-15	New.CleanUp.ReferenceOTU201782
OTU44754	0	0	0	0	1	0	0	0	0	0	0	0	0	0	0	0	0	1	0	0	0	0	0	0	0	0	0	0	0	0	0	0	0	0	0	0	k__Bacteria	p__Acidobacteria	c__Acidobacteria-6	o__iii1-15	f__unidentified_iii1-15	g__unidentified_iii1-15	s__unidentified_iii1-15	New.CleanUp.ReferenceOTU203997
OTU45056	0	0	0	0	0	0	0	0	0	0	0	1	0	1	0	0	0	0	0	0	0	0	0	0	0	0	0	0	0	0	0	0	0	0	0	0	k__Bacteria	p__Acidobacteria	c__Acidobacteria-6	o__iii1-15	f__unidentified_iii1-15	g__unidentified_iii1-15	s__unidentified_iii1-15	New.CleanUp.ReferenceOTU206078
OTU45175	0	0	0	0	0	0	0	1	0	0	0	0	1	0	0	0	0	0	0	0	0	0	0	0	0	0	0	0	0	0	0	0	0	0	0	0	k__Bacteria	p__Acidobacteria	c__Acidobacteria-6	o__iii1-15	f__unidentified_iii1-15	g__unidentified_iii1-15	s__unidentified_iii1-15	New.CleanUp.ReferenceOTU206890
OTU45278	0	0	0	0	1	0	0	0	1	0	0	0	0	0	0	0	0	0	0	0	0	0	0	0	0	0	0	0	0	0	0	0	0	0	0	0	k__Bacteria	p__Acidobacteria	c__Acidobacteria-6	o__iii1-15	f__unidentified_iii1-15	g__unidentified_iii1-15	s__unidentified_iii1-15	New.CleanUp.ReferenceOTU207525
OTU46060	0	0	1	0	0	0	0	0	0	0	0	0	1	0	0	0	0	0	0	0	0	0	0	0	0	0	0	0	0	0	0	0	0	0	0	0	k__Bacteria	p__Acidobacteria	c__Acidobacteria-6	o__iii1-15	f__unidentified_iii1-15	g__unidentified_iii1-15	s__unidentified_iii1-15	New.CleanUp.ReferenceOTU212036
OTU46061	0	0	0	0	0	0	0	0	0	0	0	0	0	0	0	0	0	0	0	0	1	1	0	0	0	0	0	0	0	0	0	0	0	0	0	0	k__Bacteria	p__Acidobacteria	c__Acidobacteria-6	o__iii1-15	f__unidentified_iii1-15	g__unidentified_iii1-15	s__unidentified_iii1-15	New.CleanUp.ReferenceOTU212043
OTU46329	0	0	0	0	0	0	1	0	0	0	0	0	0	0	0	0	0	0	0	0	0	0	1	0	0	0	0	0	0	0	0	0	0	0	0	0	k__Bacteria	p__Acidobacteria	c__Acidobacteria-6	o__iii1-15	f__unidentified_iii1-15	g__unidentified_iii1-15	s__unidentified_iii1-15	New.CleanUp.ReferenceOTU213830
OTU46366	0	0	1	0	0	0	0	0	0	0	0	0	1	0	0	0	0	0	0	0	0	0	0	0	0	0	0	0	0	0	0	0	0	0	0	0	k__Bacteria	p__Acidobacteria	c__Acidobacteria-6	o__iii1-15	f__unidentified_iii1-15	g__unidentified_iii1-15	s__unidentified_iii1-15	New.CleanUp.ReferenceOTU214043
OTU46397	0	0	1	0	0	0	0	0	0	0	0	0	0	0	0	0	0	0	0	1	0	0	0	0	0	0	0	0	0	0	0	0	0	0	0	0	k__Bacteria	p__Acidobacteria	c__Acidobacteria-6	o__iii1-15	f__unidentified_iii1-15	g__unidentified_iii1-15	s__unidentified_iii1-15	New.CleanUp.ReferenceOTU214295
OTU47255	0	0	0	0	0	0	0	1	0	0	0	0	0	0	0	0	0	0	0	0	1	0	0	0	0	0	0	0	0	0	0	0	0	0	0	0	k__Bacteria	p__Acidobacteria	c__Acidobacteria-6	o__iii1-15	f__unidentified_iii1-15	g__unidentified_iii1-15	s__unidentified_iii1-15	New.CleanUp.ReferenceOTU219451
OTU48177	0	0	0	2	0	0	0	0	0	0	0	0	0	0	0	0	0	0	0	0	0	0	0	0	0	0	0	0	0	0	0	0	0	0	0	0	k__Bacteria	p__Acidobacteria	c__Acidobacteria-6	o__iii1-15	f__unidentified_iii1-15	g__unidentified_iii1-15	s__unidentified_iii1-15	New.CleanUp.ReferenceOTU225245
OTU48509	0	0	0	0	0	0	0	0	0	1	1	0	0	0	0	0	0	0	0	0	0	0	0	0	0	0	0	0	0	0	0	0	0	0	0	0	k__Bacteria	p__Acidobacteria	c__Acidobacteria-6	o__iii1-15	f__unidentified_iii1-15	g__unidentified_iii1-15	s__unidentified_iii1-15	New.CleanUp.ReferenceOTU227340
OTU49005	0	0	0	0	0	0	0	0	1	1	0	0	0	0	0	0	0	0	0	0	0	0	0	0	0	0	0	0	0	0	0	0	0	0	0	0	k__Bacteria	p__Acidobacteria	c__Acidobacteria-6	o__iii1-15	f__unidentified_iii1-15	g__unidentified_iii1-15	s__unidentified_iii1-15	New.CleanUp.ReferenceOTU230284
OTU49683	0	1	0	0	0	0	0	0	0	0	0	0	0	1	0	0	0	0	0	0	0	0	0	0	0	0	0	0	0	0	0	0	0	0	0	0	k__Bacteria	p__Acidobacteria	c__Acidobacteria-6	o__iii1-15	f__unidentified_iii1-15	g__unidentified_iii1-15	s__unidentified_iii1-15	New.CleanUp.ReferenceOTU234358
OTU49687	0	0	0	0	0	0	0	0	0	0	0	0	0	0	0	0	0	0	0	0	0	0	0	0	0	0	0	0	0	0	0	0	0	1	0	1	k__Bacteria	p__Acidobacteria	c__Acidobacteria-6	o__iii1-15	f__unidentified_iii1-15	g__unidentified_iii1-15	s__unidentified_iii1-15	New.CleanUp.ReferenceOTU234385
OTU49815	0	0	0	0	0	0	0	0	0	0	0	0	0	0	0	2	0	0	0	0	0	0	0	0	0	0	0	0	0	0	0	0	0	0	0	0	k__Bacteria	p__Acidobacteria	c__Acidobacteria-6	o__iii1-15	f__unidentified_iii1-15	g__unidentified_iii1-15	s__unidentified_iii1-15	New.CleanUp.ReferenceOTU235195
OTU50381	0	0	1	0	0	0	0	0	1	0	0	0	0	0	0	0	0	0	0	0	0	0	0	0	0	0	0	0	0	0	0	0	0	0	0	0	k__Bacteria	p__Acidobacteria	c__Acidobacteria-6	o__iii1-15	f__unidentified_iii1-15	g__unidentified_iii1-15	s__unidentified_iii1-15	New.CleanUp.ReferenceOTU238851
OTU50699	0	0	0	0	0	0	0	0	0	0	0	0	0	0	0	0	0	0	0	1	1	0	0	0	0	0	0	0	0	0	0	0	0	0	0	0	k__Bacteria	p__Acidobacteria	c__Acidobacteria-6	o__iii1-15	f__unidentified_iii1-15	g__unidentified_iii1-15	s__unidentified_iii1-15	New.CleanUp.ReferenceOTU240852
OTU50720	0	0	0	0	0	0	0	0	0	0	0	0	0	0	1	0	0	0	0	0	0	0	0	1	0	0	0	0	0	0	0	0	0	0	0	0	k__Bacteria	p__Acidobacteria	c__Acidobacteria-6	o__iii1-15	f__unidentified_iii1-15	g__unidentified_iii1-15	s__unidentified_iii1-15	New.CleanUp.ReferenceOTU241003
OTU50767	0	0	0	0	0	0	0	0	0	0	0	0	0	0	0	0	1	0	1	0	0	0	0	0	0	0	0	0	0	0	0	0	0	0	0	0	k__Bacteria	p__Acidobacteria	c__Acidobacteria-6	o__iii1-15	f__unidentified_iii1-15	g__unidentified_iii1-15	s__unidentified_iii1-15	New.CleanUp.ReferenceOTU241272
OTU50796	0	0	0	0	0	2	0	0	0	0	0	0	0	0	0	0	0	0	0	0	0	0	0	0	0	0	0	0	0	0	0	0	0	0	0	0	k__Bacteria	p__Acidobacteria	c__Acidobacteria-6	o__iii1-15	f__unidentified_iii1-15	g__unidentified_iii1-15	s__unidentified_iii1-15	New.CleanUp.ReferenceOTU241424
OTU50864	1	0	0	0	0	0	0	0	0	0	0	0	0	0	0	0	0	0	0	0	0	0	0	1	0	0	0	0	0	0	0	0	0	0	0	0	k__Bacteria	p__Acidobacteria	c__Acidobacteria-6	o__iii1-15	f__unidentified_iii1-15	g__unidentified_iii1-15	s__unidentified_iii1-15	New.CleanUp.ReferenceOTU241760
OTU50995	0	0	0	0	0	0	0	0	0	0	0	0	0	0	0	0	2	0	0	0	0	0	0	0	0	0	0	0	0	0	0	0	0	0	0	0	k__Bacteria	p__Acidobacteria	c__Acidobacteria-6	o__iii1-15	f__unidentified_iii1-15	g__unidentified_iii1-15	s__unidentified_iii1-15	New.CleanUp.ReferenceOTU242541
OTU51329	0	0	1	0	0	0	0	0	0	0	0	0	0	0	0	0	0	0	0	0	1	0	0	0	0	0	0	0	0	0	0	0	0	0	0	0	k__Bacteria	p__Acidobacteria	c__Acidobacteria-6	o__iii1-15	f__unidentified_iii1-15	g__unidentified_iii1-15	s__unidentified_iii1-15	New.CleanUp.ReferenceOTU244552
OTU51641	1	0	0	0	0	0	0	0	0	0	0	0	0	0	1	0	0	0	0	0	0	0	0	0	0	0	0	0	0	0	0	0	0	0	0	0	k__Bacteria	p__Acidobacteria	c__Acidobacteria-6	o__iii1-15	f__unidentified_iii1-15	g__unidentified_iii1-15	s__unidentified_iii1-15	New.CleanUp.ReferenceOTU246503
OTU52167	0	0	0	0	0	0	0	0	0	0	0	0	0	0	0	1	0	0	0	0	0	0	0	1	0	0	0	0	0	0	0	0	0	0	0	0	k__Bacteria	p__Acidobacteria	c__Acidobacteria-6	o__iii1-15	f__unidentified_iii1-15	g__unidentified_iii1-15	s__unidentified_iii1-15	New.CleanUp.ReferenceOTU249729
OTU52192	0	0	0	0	0	0	0	0	1	0	0	0	0	0	0	0	0	0	0	0	0	0	1	0	0	0	0	0	0	0	0	0	0	0	0	0	k__Bacteria	p__Acidobacteria	c__Acidobacteria-6	o__iii1-15	f__unidentified_iii1-15	g__unidentified_iii1-15	s__unidentified_iii1-15	New.CleanUp.ReferenceOTU249923
OTU53069	1	0	0	0	0	0	0	0	0	0	0	0	0	0	1	0	0	0	0	0	0	0	0	0	0	0	0	0	0	0	0	0	0	0	0	0	k__Bacteria	p__Acidobacteria	c__Acidobacteria-6	o__iii1-15	f__unidentified_iii1-15	g__unidentified_iii1-15	s__unidentified_iii1-15	New.CleanUp.ReferenceOTU255323
OTU53091	2	0	0	0	0	0	0	0	0	0	0	0	0	0	0	0	0	0	0	0	0	0	0	0	0	0	0	0	0	0	0	0	0	0	0	0	k__Bacteria	p__Acidobacteria	c__Acidobacteria-6	o__iii1-15	f__unidentified_iii1-15	g__unidentified_iii1-15	s__unidentified_iii1-15	New.CleanUp.ReferenceOTU255443
OTU55433	1	0	0	0	0	0	0	0	0	0	0	0	0	0	1	0	0	0	0	0	0	0	0	0	0	0	0	0	0	0	0	0	0	0	0	0	k__Bacteria	p__Acidobacteria	c__Acidobacteria-6	o__iii1-15	f__unidentified_iii1-15	g__unidentified_iii1-15	s__unidentified_iii1-15	New.CleanUp.ReferenceOTU270287
OTU55572	0	0	0	0	0	0	0	0	0	0	0	0	0	0	0	0	0	0	0	1	0	1	0	0	0	0	0	0	0	0	0	0	0	0	0	0	k__Bacteria	p__Acidobacteria	c__Acidobacteria-6	o__iii1-15	f__unidentified_iii1-15	g__unidentified_iii1-15	s__unidentified_iii1-15	New.CleanUp.ReferenceOTU271172
OTU55691	0	0	0	1	0	0	0	0	0	0	0	0	0	0	0	0	0	0	1	0	0	0	0	0	0	0	0	0	0	0	0	0	0	0	0	0	k__Bacteria	p__Acidobacteria	c__Acidobacteria-6	o__iii1-15	f__unidentified_iii1-15	g__unidentified_iii1-15	s__unidentified_iii1-15	New.CleanUp.ReferenceOTU271936
OTU55979	0	0	0	0	0	0	0	0	0	0	0	0	0	0	0	0	0	0	0	0	0	0	2	0	0	0	0	0	0	0	0	0	0	0	0	0	k__Bacteria	p__Acidobacteria	c__Acidobacteria-6	o__iii1-15	f__unidentified_iii1-15	g__unidentified_iii1-15	s__unidentified_iii1-15	New.CleanUp.ReferenceOTU273745
OTU56347	0	0	0	0	0	0	0	0	1	1	0	0	0	0	0	0	0	0	0	0	0	0	0	0	0	0	0	0	0	0	0	0	0	0	0	0	k__Bacteria	p__Acidobacteria	c__Acidobacteria-6	o__iii1-15	f__unidentified_iii1-15	g__unidentified_iii1-15	s__unidentified_iii1-15	New.CleanUp.ReferenceOTU276203
OTU56404	0	0	0	0	0	0	0	0	0	0	0	0	0	0	1	0	0	0	0	0	1	0	0	0	0	0	0	0	0	0	0	0	0	0	0	0	k__Bacteria	p__Acidobacteria	c__Acidobacteria-6	o__iii1-15	f__unidentified_iii1-15	g__unidentified_iii1-15	s__unidentified_iii1-15	New.CleanUp.ReferenceOTU276625
OTU56884	0	0	0	0	0	0	1	0	0	0	0	1	0	0	0	0	0	0	0	0	0	0	0	0	0	0	0	0	0	0	0	0	0	0	0	0	k__Bacteria	p__Acidobacteria	c__Acidobacteria-6	o__iii1-15	f__unidentified_iii1-15	g__unidentified_iii1-15	s__unidentified_iii1-15	New.CleanUp.ReferenceOTU279526
OTU57073	0	0	0	0	0	0	0	0	0	0	0	0	0	0	0	2	0	0	0	0	0	0	0	0	0	0	0	0	0	0	0	0	0	0	0	0	k__Bacteria	p__Acidobacteria	c__Acidobacteria-6	o__iii1-15	f__unidentified_iii1-15	g__unidentified_iii1-15	s__unidentified_iii1-15	New.CleanUp.ReferenceOTU280547
OTU57200	0	0	0	0	0	0	0	0	0	0	0	1	0	0	0	0	0	0	0	0	1	0	0	0	0	0	0	0	0	0	0	0	0	0	0	0	k__Bacteria	p__Acidobacteria	c__Acidobacteria-6	o__iii1-15	f__unidentified_iii1-15	g__unidentified_iii1-15	s__unidentified_iii1-15	New.CleanUp.ReferenceOTU281350
OTU57643	1	0	0	0	0	0	0	0	1	0	0	0	0	0	0	0	0	0	0	0	0	0	0	0	0	0	0	0	0	0	0	0	0	0	0	0	k__Bacteria	p__Acidobacteria	c__Acidobacteria-6	o__iii1-15	f__unidentified_iii1-15	g__unidentified_iii1-15	s__unidentified_iii1-15	New.CleanUp.ReferenceOTU283956
OTU57774	0	0	0	0	0	0	0	0	0	0	0	0	0	0	0	0	0	0	0	0	0	0	0	0	0	0	0	0	0	0	0	0	1	0	0	1	k__Bacteria	p__Acidobacteria	c__Acidobacteria-6	o__iii1-15	f__unidentified_iii1-15	g__unidentified_iii1-15	s__unidentified_iii1-15	New.CleanUp.ReferenceOTU284812
OTU58313	0	0	0	0	0	0	0	0	1	0	0	0	0	1	0	0	0	0	0	0	0	0	0	0	0	0	0	0	0	0	0	0	0	0	0	0	k__Bacteria	p__Acidobacteria	c__Acidobacteria-6	o__iii1-15	f__unidentified_iii1-15	g__unidentified_iii1-15	s__unidentified_iii1-15	New.CleanUp.ReferenceOTU288033
OTU58945	0	0	0	0	0	0	0	0	0	1	0	0	0	0	0	0	1	0	0	0	0	0	0	0	0	0	0	0	0	0	0	0	0	0	0	0	k__Bacteria	p__Acidobacteria	c__Acidobacteria-6	o__iii1-15	f__unidentified_iii1-15	g__unidentified_iii1-15	s__unidentified_iii1-15	New.CleanUp.ReferenceOTU292111
OTU58949	2	0	0	0	0	0	0	0	0	0	0	0	0	0	0	0	0	0	0	0	0	0	0	0	0	0	0	0	0	0	0	0	0	0	0	0	k__Bacteria	p__Acidobacteria	c__Acidobacteria-6	o__iii1-15	f__unidentified_iii1-15	g__unidentified_iii1-15	s__unidentified_iii1-15	New.CleanUp.ReferenceOTU292149
OTU59013	0	0	0	0	0	0	0	1	0	0	0	0	1	0	0	0	0	0	0	0	0	0	0	0	0	0	0	0	0	0	0	0	0	0	0	0	k__Bacteria	p__Acidobacteria	c__Acidobacteria-6	o__iii1-15	f__unidentified_iii1-15	g__unidentified_iii1-15	s__unidentified_iii1-15	New.CleanUp.ReferenceOTU292550
OTU60002	0	0	0	1	1	0	0	0	0	0	0	0	0	0	0	0	0	0	0	0	0	0	0	0	0	0	0	0	0	0	0	0	0	0	0	0	k__Bacteria	p__Acidobacteria	c__Acidobacteria-6	o__iii1-15	f__unidentified_iii1-15	g__unidentified_iii1-15	s__unidentified_iii1-15	New.CleanUp.ReferenceOTU298844
OTU60142	1	0	0	0	0	0	0	0	0	0	0	1	0	0	0	0	0	0	0	0	0	0	0	0	0	0	0	0	0	0	0	0	0	0	0	0	k__Bacteria	p__Acidobacteria	c__Acidobacteria-6	o__iii1-15	f__unidentified_iii1-15	g__unidentified_iii1-15	s__unidentified_iii1-15	New.CleanUp.ReferenceOTU299643
OTU60145	0	1	0	0	0	0	0	0	0	0	0	0	0	0	0	0	0	0	0	0	0	0	0	1	0	0	0	0	0	0	0	0	0	0	0	0	k__Bacteria	p__Acidobacteria	c__Acidobacteria-6	o__iii1-15	f__unidentified_iii1-15	g__unidentified_iii1-15	s__unidentified_iii1-15	New.CleanUp.ReferenceOTU299649
OTU60973	0	1	0	0	0	0	0	0	0	0	0	0	0	0	0	0	0	0	0	0	0	0	0	0	0	1	0	0	0	0	0	0	0	0	0	0	k__Bacteria	p__Acidobacteria	c__Acidobacteria-6	o__iii1-15	f__unidentified_iii1-15	g__unidentified_iii1-15	s__unidentified_iii1-15	New.CleanUp.ReferenceOTU304808
OTU61024	0	0	0	0	0	0	0	1	0	0	0	0	0	0	1	0	0	0	0	0	0	0	0	0	0	0	0	0	0	0	0	0	0	0	0	0	k__Bacteria	p__Acidobacteria	c__Acidobacteria-6	o__iii1-15	f__unidentified_iii1-15	g__unidentified_iii1-15	s__unidentified_iii1-15	New.CleanUp.ReferenceOTU305150
OTU61273	0	0	0	0	0	0	0	0	0	1	0	0	0	0	1	0	0	0	0	0	0	0	0	0	0	0	0	0	0	0	0	0	0	0	0	0	k__Bacteria	p__Acidobacteria	c__Acidobacteria-6	o__iii1-15	f__unidentified_iii1-15	g__unidentified_iii1-15	s__unidentified_iii1-15	New.CleanUp.ReferenceOTU306857
OTU62264	0	0	0	0	0	0	0	0	0	0	0	0	0	0	0	0	0	0	0	0	0	0	0	0	0	0	0	0	1	0	0	0	0	1	0	0	k__Bacteria	p__Acidobacteria	c__Acidobacteria-6	o__iii1-15	f__unidentified_iii1-15	g__unidentified_iii1-15	s__unidentified_iii1-15	New.CleanUp.ReferenceOTU313131
OTU62345	0	1	0	0	0	0	0	0	0	0	0	0	1	0	0	0	0	0	0	0	0	0	0	0	0	0	0	0	0	0	0	0	0	0	0	0	k__Bacteria	p__Acidobacteria	c__Acidobacteria-6	o__iii1-15	f__unidentified_iii1-15	g__unidentified_iii1-15	s__unidentified_iii1-15	New.CleanUp.ReferenceOTU313719
OTU62408	0	0	0	0	0	0	0	0	0	0	0	2	0	0	0	0	0	0	0	0	0	0	0	0	0	0	0	0	0	0	0	0	0	0	0	0	k__Bacteria	p__Acidobacteria	c__Acidobacteria-6	o__iii1-15	f__unidentified_iii1-15	g__unidentified_iii1-15	s__unidentified_iii1-15	New.CleanUp.ReferenceOTU314141
OTU62429	0	0	0	0	0	0	0	0	0	0	0	0	0	0	0	0	0	1	0	0	0	0	0	0	0	0	0	0	0	0	0	0	1	0	0	0	k__Bacteria	p__Acidobacteria	c__Acidobacteria-6	o__iii1-15	f__unidentified_iii1-15	g__unidentified_iii1-15	s__unidentified_iii1-15	New.CleanUp.ReferenceOTU314296
OTU62697	0	0	0	0	0	0	0	0	0	0	0	0	0	0	0	0	0	0	0	0	1	0	0	0	0	0	0	0	0	0	0	0	0	1	0	0	k__Bacteria	p__Acidobacteria	c__Acidobacteria-6	o__iii1-15	f__unidentified_iii1-15	g__unidentified_iii1-15	s__unidentified_iii1-15	New.CleanUp.ReferenceOTU315938
OTU63168	0	0	0	1	0	0	0	0	0	0	0	0	0	0	0	0	0	0	0	0	0	1	0	0	0	0	0	0	0	0	0	0	0	0	0	0	k__Bacteria	p__Acidobacteria	c__Acidobacteria-6	o__iii1-15	f__unidentified_iii1-15	g__unidentified_iii1-15	s__unidentified_iii1-15	New.CleanUp.ReferenceOTU318866
OTU63392	0	0	0	0	0	0	0	1	0	0	0	0	0	0	0	0	0	0	0	1	0	0	0	0	0	0	0	0	0	0	0	0	0	0	0	0	k__Bacteria	p__Acidobacteria	c__Acidobacteria-6	o__iii1-15	f__unidentified_iii1-15	g__unidentified_iii1-15	s__unidentified_iii1-15	New.CleanUp.ReferenceOTU320158
OTU63522	0	0	1	0	0	0	0	0	0	0	0	0	0	0	0	0	0	0	0	0	0	1	0	0	0	0	0	0	0	0	0	0	0	0	0	0	k__Bacteria	p__Acidobacteria	c__Acidobacteria-6	o__iii1-15	f__unidentified_iii1-15	g__unidentified_iii1-15	s__unidentified_iii1-15	New.CleanUp.ReferenceOTU321013
OTU63868	0	0	0	0	0	0	0	0	0	0	0	0	0	0	0	0	0	0	0	0	0	0	1	0	0	0	0	0	0	0	0	0	1	0	0	0	k__Bacteria	p__Acidobacteria	c__Acidobacteria-6	o__iii1-15	f__unidentified_iii1-15	g__unidentified_iii1-15	s__unidentified_iii1-15	New.CleanUp.ReferenceOTU323228
OTU63887	0	0	0	0	0	0	0	0	0	0	0	0	0	0	0	0	0	0	0	0	1	0	0	0	0	0	0	0	0	0	0	0	0	0	0	1	k__Bacteria	p__Acidobacteria	c__Acidobacteria-6	o__iii1-15	f__unidentified_iii1-15	g__unidentified_iii1-15	s__unidentified_iii1-15	New.CleanUp.ReferenceOTU323373
OTU63913	0	0	0	0	0	0	0	0	0	0	0	0	0	0	0	0	0	0	2	0	0	0	0	0	0	0	0	0	0	0	0	0	0	0	0	0	k__Bacteria	p__Acidobacteria	c__Acidobacteria-6	o__iii1-15	f__unidentified_iii1-15	g__unidentified_iii1-15	s__unidentified_iii1-15	New.CleanUp.ReferenceOTU323602
OTU64203	0	0	0	0	0	0	0	0	0	0	0	0	0	0	0	0	0	0	0	1	1	0	0	0	0	0	0	0	0	0	0	0	0	0	0	0	k__Bacteria	p__Acidobacteria	c__Acidobacteria-6	o__iii1-15	f__unidentified_iii1-15	g__unidentified_iii1-15	s__unidentified_iii1-15	New.CleanUp.ReferenceOTU325584
OTU64260	0	0	1	1	0	0	0	0	0	0	0	0	0	0	0	0	0	0	0	0	0	0	0	0	0	0	0	0	0	0	0	0	0	0	0	0	k__Bacteria	p__Acidobacteria	c__Acidobacteria-6	o__iii1-15	f__unidentified_iii1-15	g__unidentified_iii1-15	s__unidentified_iii1-15	New.CleanUp.ReferenceOTU325945
OTU64436	0	1	1	0	0	0	0	0	0	0	0	0	0	0	0	0	0	0	0	0	0	0	0	0	0	0	0	0	0	0	0	0	0	0	0	0	k__Bacteria	p__Acidobacteria	c__Acidobacteria-6	o__iii1-15	f__unidentified_iii1-15	g__unidentified_iii1-15	s__unidentified_iii1-15	New.CleanUp.ReferenceOTU327370
OTU64913	0	0	0	0	0	0	0	0	0	0	0	0	0	0	1	0	0	0	0	0	0	0	0	1	0	0	0	0	0	0	0	0	0	0	0	0	k__Bacteria	p__Acidobacteria	c__Acidobacteria-6	o__iii1-15	f__unidentified_iii1-15	g__unidentified_iii1-15	s__unidentified_iii1-15	New.CleanUp.ReferenceOTU330441
OTU65212	1	0	0	0	0	0	0	0	1	0	0	0	0	0	0	0	0	0	0	0	0	0	0	0	0	0	0	0	0	0	0	0	0	0	0	0	k__Bacteria	p__Acidobacteria	c__Acidobacteria-6	o__iii1-15	f__unidentified_iii1-15	g__unidentified_iii1-15	s__unidentified_iii1-15	New.CleanUp.ReferenceOTU332306
OTU65236	0	0	0	0	0	0	0	0	0	0	0	0	0	0	0	0	0	0	1	0	0	1	0	0	0	0	0	0	0	0	0	0	0	0	0	0	k__Bacteria	p__Acidobacteria	c__Acidobacteria-6	o__iii1-15	f__unidentified_iii1-15	g__unidentified_iii1-15	s__unidentified_iii1-15	New.CleanUp.ReferenceOTU332456
OTU65259	1	0	0	0	0	0	0	0	0	0	0	1	0	0	0	0	0	0	0	0	0	0	0	0	0	0	0	0	0	0	0	0	0	0	0	0	k__Bacteria	p__Acidobacteria	c__Acidobacteria-6	o__iii1-15	f__unidentified_iii1-15	g__unidentified_iii1-15	s__unidentified_iii1-15	New.CleanUp.ReferenceOTU332567
OTU65735	0	0	0	0	0	0	0	0	0	0	0	2	0	0	0	0	0	0	0	0	0	0	0	0	0	0	0	0	0	0	0	0	0	0	0	0	k__Bacteria	p__Acidobacteria	c__Acidobacteria-6	o__iii1-15	f__unidentified_iii1-15	g__unidentified_iii1-15	s__unidentified_iii1-15	New.CleanUp.ReferenceOTU335718
OTU66000	0	0	0	0	0	0	0	0	0	0	1	0	0	0	0	0	1	0	0	0	0	0	0	0	0	0	0	0	0	0	0	0	0	0	0	0	k__Bacteria	p__Acidobacteria	c__Acidobacteria-6	o__iii1-15	f__unidentified_iii1-15	g__unidentified_iii1-15	s__unidentified_iii1-15	New.CleanUp.ReferenceOTU337388
OTU66198	0	0	1	0	0	0	0	0	0	0	0	0	0	1	0	0	0	0	0	0	0	0	0	0	0	0	0	0	0	0	0	0	0	0	0	0	k__Bacteria	p__Acidobacteria	c__Acidobacteria-6	o__iii1-15	f__unidentified_iii1-15	g__unidentified_iii1-15	s__unidentified_iii1-15	New.CleanUp.ReferenceOTU338887
OTU66594	0	1	0	0	0	0	0	0	1	0	0	0	0	0	0	0	0	0	0	0	0	0	0	0	0	0	0	0	0	0	0	0	0	0	0	0	k__Bacteria	p__Acidobacteria	c__Acidobacteria-6	o__iii1-15	f__unidentified_iii1-15	g__unidentified_iii1-15	s__unidentified_iii1-15	New.CleanUp.ReferenceOTU341592
OTU66966	0	0	0	0	0	0	0	0	0	0	0	0	0	0	1	0	0	0	0	0	0	0	0	1	0	0	0	0	0	0	0	0	0	0	0	0	k__Bacteria	p__Acidobacteria	c__Acidobacteria-6	o__iii1-15	f__unidentified_iii1-15	g__unidentified_iii1-15	s__unidentified_iii1-15	New.CleanUp.ReferenceOTU344004
OTU1035	0	0	0	0	0	0	0	0	0	0	0	0	0	0	0	1	0	0	0	0	0	0	0	0	0	0	0	0	0	0	0	0	0	0	0	0	k__Bacteria	p__Acidobacteria	c__Acidobacteria-6	o__iii1-15	f__unidentified_iii1-15	g__unidentified_iii1-15	s__unidentified_iii1-15	4442090
OTU1671	0	0	0	0	1	0	0	0	0	0	0	0	0	0	0	0	0	0	0	0	0	0	0	0	0	0	0	0	0	0	0	0	0	0	0	0	k__Bacteria	p__Acidobacteria	c__Acidobacteria-6	o__iii1-15	f__unidentified_iii1-15	g__unidentified_iii1-15	s__unidentified_iii1-15	23209
OTU1767	0	0	1	0	0	0	0	0	0	0	0	0	0	0	0	0	0	0	0	0	0	0	0	0	0	0	0	0	0	0	0	0	0	0	0	0	k__Bacteria	p__Acidobacteria	c__Acidobacteria-6	o__iii1-15	f__unidentified_iii1-15	g__unidentified_iii1-15	s__unidentified_iii1-15	4041974
OTU2286	0	0	0	0	0	0	0	0	0	0	0	0	0	0	0	0	0	0	1	0	0	0	0	0	0	0	0	0	0	0	0	0	0	0	0	0	k__Bacteria	p__Acidobacteria	c__Acidobacteria-6	o__iii1-15	f__unidentified_iii1-15	g__unidentified_iii1-15	s__unidentified_iii1-15	801831
OTU2653	0	0	0	0	0	0	0	0	0	0	0	0	0	1	0	0	0	0	0	0	0	0	0	0	0	0	0	0	0	0	0	0	0	0	0	0	k__Bacteria	p__Acidobacteria	c__Acidobacteria-6	o__iii1-15	f__unidentified_iii1-15	g__unidentified_iii1-15	s__unidentified_iii1-15	811435
OTU2895	1	0	0	0	0	0	0	0	0	0	0	0	0	0	0	0	0	0	0	0	0	0	0	0	0	0	0	0	0	0	0	0	0	0	0	0	k__Bacteria	p__Acidobacteria	c__Acidobacteria-6	o__iii1-15	f__unidentified_iii1-15	g__unidentified_iii1-15	s__unidentified_iii1-15	151131
OTU3146	0	0	0	0	0	0	0	0	0	0	0	0	0	0	0	0	0	0	1	0	0	0	0	0	0	0	0	0	0	0	0	0	0	0	0	0	k__Bacteria	p__Acidobacteria	c__Acidobacteria-6	o__iii1-15	f__unidentified_iii1-15	g__unidentified_iii1-15	s__unidentified_iii1-15	90253
OTU3239	0	0	0	0	0	0	0	0	0	0	0	0	0	0	0	1	0	0	0	0	0	0	0	0	0	0	0	0	0	0	0	0	0	0	0	0	k__Bacteria	p__Acidobacteria	c__Acidobacteria-6	o__iii1-15	f__unidentified_iii1-15	g__unidentified_iii1-15	s__unidentified_iii1-15	368658
OTU3420	0	0	0	0	0	0	0	0	0	0	0	0	0	0	0	0	0	0	0	0	0	0	0	1	0	0	0	0	0	0	0	0	0	0	0	0	k__Bacteria	p__Acidobacteria	c__Acidobacteria-6	o__iii1-15	f__unidentified_iii1-15	g__unidentified_iii1-15	s__unidentified_iii1-15	357071
OTU3668	0	0	0	0	0	0	0	0	0	0	0	0	0	0	0	1	0	0	0	0	0	0	0	0	0	0	0	0	0	0	0	0	0	0	0	0	k__Bacteria	p__Acidobacteria	c__Acidobacteria-6	o__iii1-15	f__unidentified_iii1-15	g__unidentified_iii1-15	s__unidentified_iii1-15	691966
OTU3866	0	0	0	0	0	0	0	0	0	0	0	0	0	0	0	0	0	0	0	0	0	0	0	1	0	0	0	0	0	0	0	0	0	0	0	0	k__Bacteria	p__Acidobacteria	c__Acidobacteria-6	o__iii1-15	f__unidentified_iii1-15	g__unidentified_iii1-15	s__unidentified_iii1-15	305400
OTU4151	1	0	0	0	0	0	0	0	0	0	0	0	0	0	0	0	0	0	0	0	0	0	0	0	0	0	0	0	0	0	0	0	0	0	0	0	k__Bacteria	p__Acidobacteria	c__Acidobacteria-6	o__iii1-15	f__unidentified_iii1-15	g__unidentified_iii1-15	s__unidentified_iii1-15	322668
OTU4256	0	0	0	0	0	1	0	0	0	0	0	0	0	0	0	0	0	0	0	0	0	0	0	0	0	0	0	0	0	0	0	0	0	0	0	0	k__Bacteria	p__Acidobacteria	c__Acidobacteria-6	o__iii1-15	f__unidentified_iii1-15	g__unidentified_iii1-15	s__unidentified_iii1-15	229803
OTU4714	0	0	0	0	0	0	0	0	0	0	0	0	0	1	0	0	0	0	0	0	0	0	0	0	0	0	0	0	0	0	0	0	0	0	0	0	k__Bacteria	p__Acidobacteria	c__Acidobacteria-6	o__iii1-15	f__unidentified_iii1-15	g__unidentified_iii1-15	s__unidentified_iii1-15	4316328
OTU4809	0	0	0	0	0	0	0	0	0	0	0	0	0	0	1	0	0	0	0	0	0	0	0	0	0	0	0	0	0	0	0	0	0	0	0	0	k__Bacteria	p__Acidobacteria	c__Acidobacteria-6	o__iii1-15	f__unidentified_iii1-15	g__unidentified_iii1-15	s__unidentified_iii1-15	814817
OTU5661	0	0	0	0	0	0	0	0	0	0	0	0	0	1	0	0	0	0	0	0	0	0	0	0	0	0	0	0	0	0	0	0	0	0	0	0	k__Bacteria	p__Acidobacteria	c__Acidobacteria-6	o__iii1-15	f__unidentified_iii1-15	g__unidentified_iii1-15	s__unidentified_iii1-15	3755712
OTU6199	0	0	0	0	0	0	0	0	0	0	0	0	0	1	0	0	0	0	0	0	0	0	0	0	0	0	0	0	0	0	0	0	0	0	0	0	k__Bacteria	p__Acidobacteria	c__Acidobacteria-6	o__iii1-15	f__unidentified_iii1-15	g__unidentified_iii1-15	s__unidentified_iii1-15	205244
OTU7222	0	0	0	0	0	0	0	0	0	0	0	0	0	0	0	0	0	0	0	1	0	0	0	0	0	0	0	0	0	0	0	0	0	0	0	0	k__Bacteria	p__Acidobacteria	c__Acidobacteria-6	o__iii1-15	f__unidentified_iii1-15	g__unidentified_iii1-15	s__unidentified_iii1-15	668399
OTU7390	0	0	0	0	0	0	0	0	0	0	0	0	0	0	0	0	0	0	0	0	0	0	0	1	0	0	0	0	0	0	0	0	0	0	0	0	k__Bacteria	p__Acidobacteria	c__Acidobacteria-6	o__iii1-15	f__unidentified_iii1-15	g__unidentified_iii1-15	s__unidentified_iii1-15	4004674
OTU7507	0	0	0	0	0	0	0	0	0	0	0	0	0	0	1	0	0	0	0	0	0	0	0	0	0	0	0	0	0	0	0	0	0	0	0	0	k__Bacteria	p__Acidobacteria	c__Acidobacteria-6	o__iii1-15	f__unidentified_iii1-15	g__unidentified_iii1-15	s__unidentified_iii1-15	783370
OTU8325	0	0	0	0	0	0	0	0	1	0	0	0	0	0	0	0	0	0	0	0	0	0	0	0	0	0	0	0	0	0	0	0	0	0	0	0	k__Bacteria	p__Acidobacteria	c__Acidobacteria-6	o__iii1-15	f__unidentified_iii1-15	g__unidentified_iii1-15	s__unidentified_iii1-15	3129322
OTU8841	0	0	0	0	0	0	0	0	0	0	0	0	0	0	0	0	0	0	0	0	0	0	0	0	0	0	0	0	0	0	0	0	1	0	0	0	k__Bacteria	p__Acidobacteria	c__Acidobacteria-6	o__iii1-15	f__unidentified_iii1-15	g__unidentified_iii1-15	s__unidentified_iii1-15	575708
OTU9173	0	0	0	0	0	0	0	0	0	0	0	0	0	0	0	0	0	0	0	0	0	1	0	0	0	0	0	0	0	0	0	0	0	0	0	0	k__Bacteria	p__Acidobacteria	c__Acidobacteria-6	o__iii1-15	f__unidentified_iii1-15	g__unidentified_iii1-15	s__unidentified_iii1-15	676787
OTU10585	0	0	0	0	0	0	0	0	0	0	0	0	0	0	0	0	0	0	0	0	0	0	0	1	0	0	0	0	0	0	0	0	0	0	0	0	k__Bacteria	p__Acidobacteria	c__Acidobacteria-6	o__iii1-15	f__unidentified_iii1-15	g__unidentified_iii1-15	s__unidentified_iii1-15	637184
OTU10782	0	1	0	0	0	0	0	0	0	0	0	0	0	0	0	0	0	0	0	0	0	0	0	0	0	0	0	0	0	0	0	0	0	0	0	0	k__Bacteria	p__Acidobacteria	c__Acidobacteria-6	o__iii1-15	f__unidentified_iii1-15	g__unidentified_iii1-15	s__unidentified_iii1-15	836262
OTU11397	0	0	0	0	0	0	0	0	0	0	0	0	0	0	0	1	0	0	0	0	0	0	0	0	0	0	0	0	0	0	0	0	0	0	0	0	k__Bacteria	p__Acidobacteria	c__Acidobacteria-6	o__iii1-15	f__unidentified_iii1-15	g__unidentified_iii1-15	s__unidentified_iii1-15	4292811
OTU12553	0	1	0	0	0	0	0	0	0	0	0	0	0	0	0	0	0	0	0	0	0	0	0	0	0	0	0	0	0	0	0	0	0	0	0	0	k__Bacteria	p__Acidobacteria	c__Acidobacteria-6	o__iii1-15	f__unidentified_iii1-15	g__unidentified_iii1-15	s__unidentified_iii1-15	New.CleanUp.ReferenceOTU732
OTU12560	0	0	0	0	0	0	0	1	0	0	0	0	0	0	0	0	0	0	0	0	0	0	0	0	0	0	0	0	0	0	0	0	0	0	0	0	k__Bacteria	p__Acidobacteria	c__Acidobacteria-6	o__iii1-15	f__unidentified_iii1-15	g__unidentified_iii1-15	s__unidentified_iii1-15	New.CleanUp.ReferenceOTU816
OTU12629	0	0	0	0	0	0	0	0	0	0	0	0	0	0	1	0	0	0	0	0	0	0	0	0	0	0	0	0	0	0	0	0	0	0	0	0	k__Bacteria	p__Acidobacteria	c__Acidobacteria-6	o__iii1-15	f__unidentified_iii1-15	g__unidentified_iii1-15	s__unidentified_iii1-15	New.CleanUp.ReferenceOTU1270
OTU12801	0	0	0	0	0	0	0	0	0	0	0	0	0	0	0	0	0	0	0	0	0	0	0	0	0	0	0	0	0	0	0	0	1	0	0	0	k__Bacteria	p__Acidobacteria	c__Acidobacteria-6	o__iii1-15	f__unidentified_iii1-15	g__unidentified_iii1-15	s__unidentified_iii1-15	New.CleanUp.ReferenceOTU2403
OTU12913	0	0	0	0	0	0	0	0	0	1	0	0	0	0	0	0	0	0	0	0	0	0	0	0	0	0	0	0	0	0	0	0	0	0	0	0	k__Bacteria	p__Acidobacteria	c__Acidobacteria-6	o__iii1-15	f__unidentified_iii1-15	g__unidentified_iii1-15	s__unidentified_iii1-15	New.CleanUp.ReferenceOTU3031
OTU13169	0	0	1	0	0	0	0	0	0	0	0	0	0	0	0	0	0	0	0	0	0	0	0	0	0	0	0	0	0	0	0	0	0	0	0	0	k__Bacteria	p__Acidobacteria	c__Acidobacteria-6	o__iii1-15	f__unidentified_iii1-15	g__unidentified_iii1-15	s__unidentified_iii1-15	New.CleanUp.ReferenceOTU4560
OTU13288	0	0	0	0	0	0	0	0	0	0	0	0	1	0	0	0	0	0	0	0	0	0	0	0	0	0	0	0	0	0	0	0	0	0	0	0	k__Bacteria	p__Acidobacteria	c__Acidobacteria-6	o__iii1-15	f__unidentified_iii1-15	g__unidentified_iii1-15	s__unidentified_iii1-15	New.CleanUp.ReferenceOTU5235
OTU13579	0	0	0	0	0	0	0	0	0	0	0	0	0	0	0	0	1	0	0	0	0	0	0	0	0	0	0	0	0	0	0	0	0	0	0	0	k__Bacteria	p__Acidobacteria	c__Acidobacteria-6	o__iii1-15	f__unidentified_iii1-15	g__unidentified_iii1-15	s__unidentified_iii1-15	New.CleanUp.ReferenceOTU7164
OTU13711	0	0	0	0	0	0	0	0	0	0	0	0	0	1	0	0	0	0	0	0	0	0	0	0	0	0	0	0	0	0	0	0	0	0	0	0	k__Bacteria	p__Acidobacteria	c__Acidobacteria-6	o__iii1-15	f__unidentified_iii1-15	g__unidentified_iii1-15	s__unidentified_iii1-15	New.CleanUp.ReferenceOTU7991
OTU13730	1	0	0	0	0	0	0	0	0	0	0	0	0	0	0	0	0	0	0	0	0	0	0	0	0	0	0	0	0	0	0	0	0	0	0	0	k__Bacteria	p__Acidobacteria	c__Acidobacteria-6	o__iii1-15	f__unidentified_iii1-15	g__unidentified_iii1-15	s__unidentified_iii1-15	New.CleanUp.ReferenceOTU8080
OTU13840	0	0	0	0	0	0	0	0	0	0	0	0	0	0	0	0	0	0	0	0	0	1	0	0	0	0	0	0	0	0	0	0	0	0	0	0	k__Bacteria	p__Acidobacteria	c__Acidobacteria-6	o__iii1-15	f__unidentified_iii1-15	g__unidentified_iii1-15	s__unidentified_iii1-15	New.CleanUp.ReferenceOTU8720
OTU14027	0	0	0	0	0	0	0	0	0	0	0	0	0	1	0	0	0	0	0	0	0	0	0	0	0	0	0	0	0	0	0	0	0	0	0	0	k__Bacteria	p__Acidobacteria	c__Acidobacteria-6	o__iii1-15	f__unidentified_iii1-15	g__unidentified_iii1-15	s__unidentified_iii1-15	New.CleanUp.ReferenceOTU9944
OTU14483	0	0	0	0	0	0	0	0	0	0	0	0	0	1	0	0	0	0	0	0	0	0	0	0	0	0	0	0	0	0	0	0	0	0	0	0	k__Bacteria	p__Acidobacteria	c__Acidobacteria-6	o__iii1-15	f__unidentified_iii1-15	g__unidentified_iii1-15	s__unidentified_iii1-15	New.CleanUp.ReferenceOTU12723
OTU14575	0	0	0	0	0	0	0	0	0	0	0	0	0	1	0	0	0	0	0	0	0	0	0	0	0	0	0	0	0	0	0	0	0	0	0	0	k__Bacteria	p__Acidobacteria	c__Acidobacteria-6	o__iii1-15	f__unidentified_iii1-15	g__unidentified_iii1-15	s__unidentified_iii1-15	New.CleanUp.ReferenceOTU13389
OTU14812	0	0	1	0	0	0	0	0	0	0	0	0	0	0	0	0	0	0	0	0	0	0	0	0	0	0	0	0	0	0	0	0	0	0	0	0	k__Bacteria	p__Acidobacteria	c__Acidobacteria-6	o__iii1-15	f__unidentified_iii1-15	g__unidentified_iii1-15	s__unidentified_iii1-15	New.CleanUp.ReferenceOTU14768
OTU14830	0	0	0	0	0	0	0	0	0	0	0	0	1	0	0	0	0	0	0	0	0	0	0	0	0	0	0	0	0	0	0	0	0	0	0	0	k__Bacteria	p__Acidobacteria	c__Acidobacteria-6	o__iii1-15	f__unidentified_iii1-15	g__unidentified_iii1-15	s__unidentified_iii1-15	New.CleanUp.ReferenceOTU14838
OTU14974	0	0	0	0	0	0	0	0	0	0	0	0	0	0	0	0	1	0	0	0	0	0	0	0	0	0	0	0	0	0	0	0	0	0	0	0	k__Bacteria	p__Acidobacteria	c__Acidobacteria-6	o__iii1-15	f__unidentified_iii1-15	g__unidentified_iii1-15	s__unidentified_iii1-15	New.CleanUp.ReferenceOTU15613
OTU15374	0	0	0	0	0	0	0	0	0	0	0	1	0	0	0	0	0	0	0	0	0	0	0	0	0	0	0	0	0	0	0	0	0	0	0	0	k__Bacteria	p__Acidobacteria	c__Acidobacteria-6	o__iii1-15	f__unidentified_iii1-15	g__unidentified_iii1-15	s__unidentified_iii1-15	New.CleanUp.ReferenceOTU17964
OTU15433	0	0	0	1	0	0	0	0	0	0	0	0	0	0	0	0	0	0	0	0	0	0	0	0	0	0	0	0	0	0	0	0	0	0	0	0	k__Bacteria	p__Acidobacteria	c__Acidobacteria-6	o__iii1-15	f__unidentified_iii1-15	g__unidentified_iii1-15	s__unidentified_iii1-15	New.CleanUp.ReferenceOTU18360
OTU15781	0	0	0	0	0	0	0	0	0	0	0	0	0	0	0	0	0	0	1	0	0	0	0	0	0	0	0	0	0	0	0	0	0	0	0	0	k__Bacteria	p__Acidobacteria	c__Acidobacteria-6	o__iii1-15	f__unidentified_iii1-15	g__unidentified_iii1-15	s__unidentified_iii1-15	New.CleanUp.ReferenceOTU20647
OTU16924	0	1	0	0	0	0	0	0	0	0	0	0	0	0	0	0	0	0	0	0	0	0	0	0	0	0	0	0	0	0	0	0	0	0	0	0	k__Bacteria	p__Acidobacteria	c__Acidobacteria-6	o__iii1-15	f__unidentified_iii1-15	g__unidentified_iii1-15	s__unidentified_iii1-15	New.CleanUp.ReferenceOTU27404
OTU16969	0	0	0	0	0	0	0	0	0	0	0	0	0	0	0	0	0	0	0	0	0	0	0	1	0	0	0	0	0	0	0	0	0	0	0	0	k__Bacteria	p__Acidobacteria	c__Acidobacteria-6	o__iii1-15	f__unidentified_iii1-15	g__unidentified_iii1-15	s__unidentified_iii1-15	New.CleanUp.ReferenceOTU27622
OTU17005	0	0	0	0	0	0	0	0	0	0	0	0	0	0	0	1	0	0	0	0	0	0	0	0	0	0	0	0	0	0	0	0	0	0	0	0	k__Bacteria	p__Acidobacteria	c__Acidobacteria-6	o__iii1-15	f__unidentified_iii1-15	g__unidentified_iii1-15	s__unidentified_iii1-15	New.CleanUp.ReferenceOTU27827
OTU17185	1	0	0	0	0	0	0	0	0	0	0	0	0	0	0	0	0	0	0	0	0	0	0	0	0	0	0	0	0	0	0	0	0	0	0	0	k__Bacteria	p__Acidobacteria	c__Acidobacteria-6	o__iii1-15	f__unidentified_iii1-15	g__unidentified_iii1-15	s__unidentified_iii1-15	New.CleanUp.ReferenceOTU29080
OTU17635	0	0	0	0	0	0	0	0	0	0	0	0	0	0	0	0	0	0	0	0	0	0	0	0	0	1	0	0	0	0	0	0	0	0	0	0	k__Bacteria	p__Acidobacteria	c__Acidobacteria-6	o__iii1-15	f__unidentified_iii1-15	g__unidentified_iii1-15	s__unidentified_iii1-15	New.CleanUp.ReferenceOTU31791
OTU17848	0	0	0	0	0	0	0	0	0	0	0	0	0	0	1	0	0	0	0	0	0	0	0	0	0	0	0	0	0	0	0	0	0	0	0	0	k__Bacteria	p__Acidobacteria	c__Acidobacteria-6	o__iii1-15	f__unidentified_iii1-15	g__unidentified_iii1-15	s__unidentified_iii1-15	New.CleanUp.ReferenceOTU33043
OTU18608	0	0	0	0	0	0	0	0	0	0	0	0	0	0	0	0	0	0	0	0	0	0	1	0	0	0	0	0	0	0	0	0	0	0	0	0	k__Bacteria	p__Acidobacteria	c__Acidobacteria-6	o__iii1-15	f__unidentified_iii1-15	g__unidentified_iii1-15	s__unidentified_iii1-15	New.CleanUp.ReferenceOTU37683
OTU18685	0	0	0	0	0	0	0	0	0	0	0	0	1	0	0	0	0	0	0	0	0	0	0	0	0	0	0	0	0	0	0	0	0	0	0	0	k__Bacteria	p__Acidobacteria	c__Acidobacteria-6	o__iii1-15	f__unidentified_iii1-15	g__unidentified_iii1-15	s__unidentified_iii1-15	New.CleanUp.ReferenceOTU38167
OTU18713	0	0	0	0	0	0	0	1	0	0	0	0	0	0	0	0	0	0	0	0	0	0	0	0	0	0	0	0	0	0	0	0	0	0	0	0	k__Bacteria	p__Acidobacteria	c__Acidobacteria-6	o__iii1-15	f__unidentified_iii1-15	g__unidentified_iii1-15	s__unidentified_iii1-15	New.CleanUp.ReferenceOTU38331
OTU18721	0	0	0	0	0	0	0	0	0	0	0	0	0	0	1	0	0	0	0	0	0	0	0	0	0	0	0	0	0	0	0	0	0	0	0	0	k__Bacteria	p__Acidobacteria	c__Acidobacteria-6	o__iii1-15	f__unidentified_iii1-15	g__unidentified_iii1-15	s__unidentified_iii1-15	New.CleanUp.ReferenceOTU38387
OTU18852	0	0	0	0	0	0	0	0	0	0	0	0	0	0	0	0	0	0	0	0	1	0	0	0	0	0	0	0	0	0	0	0	0	0	0	0	k__Bacteria	p__Acidobacteria	c__Acidobacteria-6	o__iii1-15	f__unidentified_iii1-15	g__unidentified_iii1-15	s__unidentified_iii1-15	New.CleanUp.ReferenceOTU39261
OTU18906	0	0	0	0	0	0	0	0	0	0	0	1	0	0	0	0	0	0	0	0	0	0	0	0	0	0	0	0	0	0	0	0	0	0	0	0	k__Bacteria	p__Acidobacteria	c__Acidobacteria-6	o__iii1-15	f__unidentified_iii1-15	g__unidentified_iii1-15	s__unidentified_iii1-15	New.CleanUp.ReferenceOTU39565
OTU19146	0	0	0	0	0	0	0	0	0	0	0	0	0	0	0	1	0	0	0	0	0	0	0	0	0	0	0	0	0	0	0	0	0	0	0	0	k__Bacteria	p__Acidobacteria	c__Acidobacteria-6	o__iii1-15	f__unidentified_iii1-15	g__unidentified_iii1-15	s__unidentified_iii1-15	New.CleanUp.ReferenceOTU41102
OTU19192	0	0	0	0	0	0	0	0	0	0	0	0	0	0	0	0	0	0	0	0	0	0	1	0	0	0	0	0	0	0	0	0	0	0	0	0	k__Bacteria	p__Acidobacteria	c__Acidobacteria-6	o__iii1-15	f__unidentified_iii1-15	g__unidentified_iii1-15	s__unidentified_iii1-15	New.CleanUp.ReferenceOTU41362
OTU19221	0	0	0	0	0	0	0	0	0	0	0	0	0	0	0	0	0	1	0	0	0	0	0	0	0	0	0	0	0	0	0	0	0	0	0	0	k__Bacteria	p__Acidobacteria	c__Acidobacteria-6	o__iii1-15	f__unidentified_iii1-15	g__unidentified_iii1-15	s__unidentified_iii1-15	New.CleanUp.ReferenceOTU41511
OTU19706	0	0	0	0	0	0	0	0	0	0	0	0	0	0	0	0	0	0	0	0	0	0	0	1	0	0	0	0	0	0	0	0	0	0	0	0	k__Bacteria	p__Acidobacteria	c__Acidobacteria-6	o__iii1-15	f__unidentified_iii1-15	g__unidentified_iii1-15	s__unidentified_iii1-15	New.CleanUp.ReferenceOTU44513
OTU19711	0	0	0	0	0	0	0	0	0	0	0	0	0	0	0	0	0	0	1	0	0	0	0	0	0	0	0	0	0	0	0	0	0	0	0	0	k__Bacteria	p__Acidobacteria	c__Acidobacteria-6	o__iii1-15	f__unidentified_iii1-15	g__unidentified_iii1-15	s__unidentified_iii1-15	New.CleanUp.ReferenceOTU44543
OTU19738	0	0	0	0	0	0	0	0	0	0	0	0	0	0	0	0	0	0	0	0	0	0	1	0	0	0	0	0	0	0	0	0	0	0	0	0	k__Bacteria	p__Acidobacteria	c__Acidobacteria-6	o__iii1-15	f__unidentified_iii1-15	g__unidentified_iii1-15	s__unidentified_iii1-15	New.CleanUp.ReferenceOTU44710
OTU19877	0	0	0	0	0	0	0	0	0	0	0	0	0	0	0	0	0	0	0	1	0	0	0	0	0	0	0	0	0	0	0	0	0	0	0	0	k__Bacteria	p__Acidobacteria	c__Acidobacteria-6	o__iii1-15	f__unidentified_iii1-15	g__unidentified_iii1-15	s__unidentified_iii1-15	New.CleanUp.ReferenceOTU45601
OTU19903	0	0	0	0	0	0	0	0	0	0	0	0	0	0	0	1	0	0	0	0	0	0	0	0	0	0	0	0	0	0	0	0	0	0	0	0	k__Bacteria	p__Acidobacteria	c__Acidobacteria-6	o__iii1-15	f__unidentified_iii1-15	g__unidentified_iii1-15	s__unidentified_iii1-15	New.CleanUp.ReferenceOTU45748
OTU19941	0	0	1	0	0	0	0	0	0	0	0	0	0	0	0	0	0	0	0	0	0	0	0	0	0	0	0	0	0	0	0	0	0	0	0	0	k__Bacteria	p__Acidobacteria	c__Acidobacteria-6	o__iii1-15	f__unidentified_iii1-15	g__unidentified_iii1-15	s__unidentified_iii1-15	New.CleanUp.ReferenceOTU45974
OTU20165	0	0	1	0	0	0	0	0	0	0	0	0	0	0	0	0	0	0	0	0	0	0	0	0	0	0	0	0	0	0	0	0	0	0	0	0	k__Bacteria	p__Acidobacteria	c__Acidobacteria-6	o__iii1-15	f__unidentified_iii1-15	g__unidentified_iii1-15	s__unidentified_iii1-15	New.CleanUp.ReferenceOTU47264
OTU20460	0	0	0	0	0	0	0	0	0	0	0	0	0	0	0	0	0	0	0	0	1	0	0	0	0	0	0	0	0	0	0	0	0	0	0	0	k__Bacteria	p__Acidobacteria	c__Acidobacteria-6	o__iii1-15	f__unidentified_iii1-15	g__unidentified_iii1-15	s__unidentified_iii1-15	New.CleanUp.ReferenceOTU49138
OTU20483	0	0	0	0	0	0	1	0	0	0	0	0	0	0	0	0	0	0	0	0	0	0	0	0	0	0	0	0	0	0	0	0	0	0	0	0	k__Bacteria	p__Acidobacteria	c__Acidobacteria-6	o__iii1-15	f__unidentified_iii1-15	g__unidentified_iii1-15	s__unidentified_iii1-15	New.CleanUp.ReferenceOTU49322
OTU20704	0	0	0	0	0	0	0	0	0	0	0	0	0	0	1	0	0	0	0	0	0	0	0	0	0	0	0	0	0	0	0	0	0	0	0	0	k__Bacteria	p__Acidobacteria	c__Acidobacteria-6	o__iii1-15	f__unidentified_iii1-15	g__unidentified_iii1-15	s__unidentified_iii1-15	New.CleanUp.ReferenceOTU50719
OTU20719	0	0	0	0	0	0	0	0	0	0	0	0	0	0	0	0	0	0	0	0	0	0	0	0	0	0	0	0	0	0	0	0	0	0	1	0	k__Bacteria	p__Acidobacteria	c__Acidobacteria-6	o__iii1-15	f__unidentified_iii1-15	g__unidentified_iii1-15	s__unidentified_iii1-15	New.CleanUp.ReferenceOTU50836
OTU20837	0	0	0	0	0	0	0	0	0	0	0	0	0	1	0	0	0	0	0	0	0	0	0	0	0	0	0	0	0	0	0	0	0	0	0	0	k__Bacteria	p__Acidobacteria	c__Acidobacteria-6	o__iii1-15	f__unidentified_iii1-15	g__unidentified_iii1-15	s__unidentified_iii1-15	New.CleanUp.ReferenceOTU51518
OTU20899	0	0	0	0	0	0	0	0	0	0	0	0	0	0	0	0	0	0	0	0	1	0	0	0	0	0	0	0	0	0	0	0	0	0	0	0	k__Bacteria	p__Acidobacteria	c__Acidobacteria-6	o__iii1-15	f__unidentified_iii1-15	g__unidentified_iii1-15	s__unidentified_iii1-15	New.CleanUp.ReferenceOTU51897
OTU21137	0	0	0	0	0	0	0	0	0	0	0	0	1	0	0	0	0	0	0	0	0	0	0	0	0	0	0	0	0	0	0	0	0	0	0	0	k__Bacteria	p__Acidobacteria	c__Acidobacteria-6	o__iii1-15	f__unidentified_iii1-15	g__unidentified_iii1-15	s__unidentified_iii1-15	New.CleanUp.ReferenceOTU53378
OTU21245	0	0	0	0	0	0	0	0	0	0	0	0	0	0	0	0	1	0	0	0	0	0	0	0	0	0	0	0	0	0	0	0	0	0	0	0	k__Bacteria	p__Acidobacteria	c__Acidobacteria-6	o__iii1-15	f__unidentified_iii1-15	g__unidentified_iii1-15	s__unidentified_iii1-15	New.CleanUp.ReferenceOTU53984
OTU21331	0	1	0	0	0	0	0	0	0	0	0	0	0	0	0	0	0	0	0	0	0	0	0	0	0	0	0	0	0	0	0	0	0	0	0	0	k__Bacteria	p__Acidobacteria	c__Acidobacteria-6	o__iii1-15	f__unidentified_iii1-15	g__unidentified_iii1-15	s__unidentified_iii1-15	New.CleanUp.ReferenceOTU54525
OTU21395	0	0	0	0	0	0	0	0	0	0	0	0	0	0	0	0	0	0	1	0	0	0	0	0	0	0	0	0	0	0	0	0	0	0	0	0	k__Bacteria	p__Acidobacteria	c__Acidobacteria-6	o__iii1-15	f__unidentified_iii1-15	g__unidentified_iii1-15	s__unidentified_iii1-15	New.CleanUp.ReferenceOTU54879
OTU21405	0	0	0	0	0	0	0	1	0	0	0	0	0	0	0	0	0	0	0	0	0	0	0	0	0	0	0	0	0	0	0	0	0	0	0	0	k__Bacteria	p__Acidobacteria	c__Acidobacteria-6	o__iii1-15	f__unidentified_iii1-15	g__unidentified_iii1-15	s__unidentified_iii1-15	New.CleanUp.ReferenceOTU54951
OTU21560	1	0	0	0	0	0	0	0	0	0	0	0	0	0	0	0	0	0	0	0	0	0	0	0	0	0	0	0	0	0	0	0	0	0	0	0	k__Bacteria	p__Acidobacteria	c__Acidobacteria-6	o__iii1-15	f__unidentified_iii1-15	g__unidentified_iii1-15	s__unidentified_iii1-15	New.CleanUp.ReferenceOTU55897
OTU22063	0	0	0	0	0	0	0	0	0	0	0	0	0	0	0	0	0	0	0	1	0	0	0	0	0	0	0	0	0	0	0	0	0	0	0	0	k__Bacteria	p__Acidobacteria	c__Acidobacteria-6	o__iii1-15	f__unidentified_iii1-15	g__unidentified_iii1-15	s__unidentified_iii1-15	New.CleanUp.ReferenceOTU59072
OTU22254	0	0	0	0	0	0	0	0	0	0	0	0	0	0	0	1	0	0	0	0	0	0	0	0	0	0	0	0	0	0	0	0	0	0	0	0	k__Bacteria	p__Acidobacteria	c__Acidobacteria-6	o__iii1-15	f__unidentified_iii1-15	g__unidentified_iii1-15	s__unidentified_iii1-15	New.CleanUp.ReferenceOTU60265
OTU22400	0	0	0	0	1	0	0	0	0	0	0	0	0	0	0	0	0	0	0	0	0	0	0	0	0	0	0	0	0	0	0	0	0	0	0	0	k__Bacteria	p__Acidobacteria	c__Acidobacteria-6	o__iii1-15	f__unidentified_iii1-15	g__unidentified_iii1-15	s__unidentified_iii1-15	New.CleanUp.ReferenceOTU61212
OTU22677	0	0	0	0	0	0	0	0	0	0	0	0	0	0	0	0	0	0	0	0	0	0	0	0	0	0	0	0	0	0	0	0	0	0	1	0	k__Bacteria	p__Acidobacteria	c__Acidobacteria-6	o__iii1-15	f__unidentified_iii1-15	g__unidentified_iii1-15	s__unidentified_iii1-15	New.CleanUp.ReferenceOTU62935
OTU22754	1	0	0	0	0	0	0	0	0	0	0	0	0	0	0	0	0	0	0	0	0	0	0	0	0	0	0	0	0	0	0	0	0	0	0	0	k__Bacteria	p__Acidobacteria	c__Acidobacteria-6	o__iii1-15	f__unidentified_iii1-15	g__unidentified_iii1-15	s__unidentified_iii1-15	New.CleanUp.ReferenceOTU63464
OTU22796	0	0	1	0	0	0	0	0	0	0	0	0	0	0	0	0	0	0	0	0	0	0	0	0	0	0	0	0	0	0	0	0	0	0	0	0	k__Bacteria	p__Acidobacteria	c__Acidobacteria-6	o__iii1-15	f__unidentified_iii1-15	g__unidentified_iii1-15	s__unidentified_iii1-15	New.CleanUp.ReferenceOTU63743
OTU22933	0	0	0	0	0	0	0	0	0	0	0	0	0	0	1	0	0	0	0	0	0	0	0	0	0	0	0	0	0	0	0	0	0	0	0	0	k__Bacteria	p__Acidobacteria	c__Acidobacteria-6	o__iii1-15	f__unidentified_iii1-15	g__unidentified_iii1-15	s__unidentified_iii1-15	New.CleanUp.ReferenceOTU64609
OTU23020	0	0	1	0	0	0	0	0	0	0	0	0	0	0	0	0	0	0	0	0	0	0	0	0	0	0	0	0	0	0	0	0	0	0	0	0	k__Bacteria	p__Acidobacteria	c__Acidobacteria-6	o__iii1-15	f__unidentified_iii1-15	g__unidentified_iii1-15	s__unidentified_iii1-15	New.CleanUp.ReferenceOTU65194
OTU23023	0	0	0	0	0	0	0	0	0	0	0	0	0	0	0	0	0	0	0	0	0	0	0	1	0	0	0	0	0	0	0	0	0	0	0	0	k__Bacteria	p__Acidobacteria	c__Acidobacteria-6	o__iii1-15	f__unidentified_iii1-15	g__unidentified_iii1-15	s__unidentified_iii1-15	New.CleanUp.ReferenceOTU65211
OTU23190	0	1	0	0	0	0	0	0	0	0	0	0	0	0	0	0	0	0	0	0	0	0	0	0	0	0	0	0	0	0	0	0	0	0	0	0	k__Bacteria	p__Acidobacteria	c__Acidobacteria-6	o__iii1-15	f__unidentified_iii1-15	g__unidentified_iii1-15	s__unidentified_iii1-15	New.CleanUp.ReferenceOTU66323
OTU23302	0	0	0	0	0	0	0	0	1	0	0	0	0	0	0	0	0	0	0	0	0	0	0	0	0	0	0	0	0	0	0	0	0	0	0	0	k__Bacteria	p__Acidobacteria	c__Acidobacteria-6	o__iii1-15	f__unidentified_iii1-15	g__unidentified_iii1-15	s__unidentified_iii1-15	New.CleanUp.ReferenceOTU66989
OTU23431	0	1	0	0	0	0	0	0	0	0	0	0	0	0	0	0	0	0	0	0	0	0	0	0	0	0	0	0	0	0	0	0	0	0	0	0	k__Bacteria	p__Acidobacteria	c__Acidobacteria-6	o__iii1-15	f__unidentified_iii1-15	g__unidentified_iii1-15	s__unidentified_iii1-15	New.CleanUp.ReferenceOTU67838
OTU23669	0	0	0	0	0	0	0	0	0	0	0	0	0	0	0	0	0	0	0	0	0	1	0	0	0	0	0	0	0	0	0	0	0	0	0	0	k__Bacteria	p__Acidobacteria	c__Acidobacteria-6	o__iii1-15	f__unidentified_iii1-15	g__unidentified_iii1-15	s__unidentified_iii1-15	New.CleanUp.ReferenceOTU69310
OTU23800	0	0	0	1	0	0	0	0	0	0	0	0	0	0	0	0	0	0	0	0	0	0	0	0	0	0	0	0	0	0	0	0	0	0	0	0	k__Bacteria	p__Acidobacteria	c__Acidobacteria-6	o__iii1-15	f__unidentified_iii1-15	g__unidentified_iii1-15	s__unidentified_iii1-15	New.CleanUp.ReferenceOTU70176
OTU23844	0	1	0	0	0	0	0	0	0	0	0	0	0	0	0	0	0	0	0	0	0	0	0	0	0	0	0	0	0	0	0	0	0	0	0	0	k__Bacteria	p__Acidobacteria	c__Acidobacteria-6	o__iii1-15	f__unidentified_iii1-15	g__unidentified_iii1-15	s__unidentified_iii1-15	New.CleanUp.ReferenceOTU70459
OTU24261	0	0	0	0	0	0	0	0	0	0	0	0	0	0	1	0	0	0	0	0	0	0	0	0	0	0	0	0	0	0	0	0	0	0	0	0	k__Bacteria	p__Acidobacteria	c__Acidobacteria-6	o__iii1-15	f__unidentified_iii1-15	g__unidentified_iii1-15	s__unidentified_iii1-15	New.CleanUp.ReferenceOTU73085
OTU24463	0	0	1	0	0	0	0	0	0	0	0	0	0	0	0	0	0	0	0	0	0	0	0	0	0	0	0	0	0	0	0	0	0	0	0	0	k__Bacteria	p__Acidobacteria	c__Acidobacteria-6	o__iii1-15	f__unidentified_iii1-15	g__unidentified_iii1-15	s__unidentified_iii1-15	New.CleanUp.ReferenceOTU74328
OTU24521	0	0	0	0	0	0	0	0	0	0	0	0	1	0	0	0	0	0	0	0	0	0	0	0	0	0	0	0	0	0	0	0	0	0	0	0	k__Bacteria	p__Acidobacteria	c__Acidobacteria-6	o__iii1-15	f__unidentified_iii1-15	g__unidentified_iii1-15	s__unidentified_iii1-15	New.CleanUp.ReferenceOTU74668
OTU24574	0	0	0	0	0	0	0	0	0	0	0	0	0	0	0	1	0	0	0	0	0	0	0	0	0	0	0	0	0	0	0	0	0	0	0	0	k__Bacteria	p__Acidobacteria	c__Acidobacteria-6	o__iii1-15	f__unidentified_iii1-15	g__unidentified_iii1-15	s__unidentified_iii1-15	New.CleanUp.ReferenceOTU75047
OTU24602	0	0	0	0	1	0	0	0	0	0	0	0	0	0	0	0	0	0	0	0	0	0	0	0	0	0	0	0	0	0	0	0	0	0	0	0	k__Bacteria	p__Acidobacteria	c__Acidobacteria-6	o__iii1-15	f__unidentified_iii1-15	g__unidentified_iii1-15	s__unidentified_iii1-15	New.CleanUp.ReferenceOTU75243
OTU24742	0	0	0	0	0	1	0	0	0	0	0	0	0	0	0	0	0	0	0	0	0	0	0	0	0	0	0	0	0	0	0	0	0	0	0	0	k__Bacteria	p__Acidobacteria	c__Acidobacteria-6	o__iii1-15	f__unidentified_iii1-15	g__unidentified_iii1-15	s__unidentified_iii1-15	New.CleanUp.ReferenceOTU76151
OTU24939	0	0	0	0	0	0	0	0	0	0	0	0	0	0	0	0	0	0	0	0	0	0	0	0	0	0	0	0	0	0	0	0	1	0	0	0	k__Bacteria	p__Acidobacteria	c__Acidobacteria-6	o__iii1-15	f__unidentified_iii1-15	g__unidentified_iii1-15	s__unidentified_iii1-15	New.CleanUp.ReferenceOTU77324
OTU25274	0	0	0	1	0	0	0	0	0	0	0	0	0	0	0	0	0	0	0	0	0	0	0	0	0	0	0	0	0	0	0	0	0	0	0	0	k__Bacteria	p__Acidobacteria	c__Acidobacteria-6	o__iii1-15	f__unidentified_iii1-15	g__unidentified_iii1-15	s__unidentified_iii1-15	New.CleanUp.ReferenceOTU79519
OTU25690	0	0	0	0	0	0	0	0	0	0	0	0	1	0	0	0	0	0	0	0	0	0	0	0	0	0	0	0	0	0	0	0	0	0	0	0	k__Bacteria	p__Acidobacteria	c__Acidobacteria-6	o__iii1-15	f__unidentified_iii1-15	g__unidentified_iii1-15	s__unidentified_iii1-15	New.CleanUp.ReferenceOTU82358
OTU25845	0	0	0	0	0	1	0	0	0	0	0	0	0	0	0	0	0	0	0	0	0	0	0	0	0	0	0	0	0	0	0	0	0	0	0	0	k__Bacteria	p__Acidobacteria	c__Acidobacteria-6	o__iii1-15	f__unidentified_iii1-15	g__unidentified_iii1-15	s__unidentified_iii1-15	New.CleanUp.ReferenceOTU83286
OTU25958	0	0	0	0	1	0	0	0	0	0	0	0	0	0	0	0	0	0	0	0	0	0	0	0	0	0	0	0	0	0	0	0	0	0	0	0	k__Bacteria	p__Acidobacteria	c__Acidobacteria-6	o__iii1-15	f__unidentified_iii1-15	g__unidentified_iii1-15	s__unidentified_iii1-15	New.CleanUp.ReferenceOTU84034
OTU26050	0	0	0	0	0	0	0	0	0	0	0	1	0	0	0	0	0	0	0	0	0	0	0	0	0	0	0	0	0	0	0	0	0	0	0	0	k__Bacteria	p__Acidobacteria	c__Acidobacteria-6	o__iii1-15	f__unidentified_iii1-15	g__unidentified_iii1-15	s__unidentified_iii1-15	New.CleanUp.ReferenceOTU84602
OTU26616	0	0	0	0	0	0	0	0	0	0	0	0	1	0	0	0	0	0	0	0	0	0	0	0	0	0	0	0	0	0	0	0	0	0	0	0	k__Bacteria	p__Acidobacteria	c__Acidobacteria-6	o__iii1-15	f__unidentified_iii1-15	g__unidentified_iii1-15	s__unidentified_iii1-15	New.CleanUp.ReferenceOTU88293
OTU26942	0	0	0	0	0	0	0	0	0	0	0	0	0	1	0	0	0	0	0	0	0	0	0	0	0	0	0	0	0	0	0	0	0	0	0	0	k__Bacteria	p__Acidobacteria	c__Acidobacteria-6	o__iii1-15	f__unidentified_iii1-15	g__unidentified_iii1-15	s__unidentified_iii1-15	New.CleanUp.ReferenceOTU90431
OTU27013	0	0	0	0	0	0	0	0	0	0	0	1	0	0	0	0	0	0	0	0	0	0	0	0	0	0	0	0	0	0	0	0	0	0	0	0	k__Bacteria	p__Acidobacteria	c__Acidobacteria-6	o__iii1-15	f__unidentified_iii1-15	g__unidentified_iii1-15	s__unidentified_iii1-15	New.CleanUp.ReferenceOTU90829
OTU27069	0	0	0	0	0	0	0	0	0	0	0	0	0	0	0	0	0	0	0	0	1	0	0	0	0	0	0	0	0	0	0	0	0	0	0	0	k__Bacteria	p__Acidobacteria	c__Acidobacteria-6	o__iii1-15	f__unidentified_iii1-15	g__unidentified_iii1-15	s__unidentified_iii1-15	New.CleanUp.ReferenceOTU91254
OTU27485	0	0	0	0	0	0	0	0	0	0	0	0	0	1	0	0	0	0	0	0	0	0	0	0	0	0	0	0	0	0	0	0	0	0	0	0	k__Bacteria	p__Acidobacteria	c__Acidobacteria-6	o__iii1-15	f__unidentified_iii1-15	g__unidentified_iii1-15	s__unidentified_iii1-15	New.CleanUp.ReferenceOTU94087
OTU27737	0	0	0	0	0	0	0	0	0	0	0	1	0	0	0	0	0	0	0	0	0	0	0	0	0	0	0	0	0	0	0	0	0	0	0	0	k__Bacteria	p__Acidobacteria	c__Acidobacteria-6	o__iii1-15	f__unidentified_iii1-15	g__unidentified_iii1-15	s__unidentified_iii1-15	New.CleanUp.ReferenceOTU95797
OTU28033	0	0	0	0	0	0	0	0	0	0	0	0	0	1	0	0	0	0	0	0	0	0	0	0	0	0	0	0	0	0	0	0	0	0	0	0	k__Bacteria	p__Acidobacteria	c__Acidobacteria-6	o__iii1-15	f__unidentified_iii1-15	g__unidentified_iii1-15	s__unidentified_iii1-15	New.CleanUp.ReferenceOTU97722
OTU28054	0	0	0	0	0	0	0	0	0	0	0	0	0	0	1	0	0	0	0	0	0	0	0	0	0	0	0	0	0	0	0	0	0	0	0	0	k__Bacteria	p__Acidobacteria	c__Acidobacteria-6	o__iii1-15	f__unidentified_iii1-15	g__unidentified_iii1-15	s__unidentified_iii1-15	New.CleanUp.ReferenceOTU97883
OTU28201	0	1	0	0	0	0	0	0	0	0	0	0	0	0	0	0	0	0	0	0	0	0	0	0	0	0	0	0	0	0	0	0	0	0	0	0	k__Bacteria	p__Acidobacteria	c__Acidobacteria-6	o__iii1-15	f__unidentified_iii1-15	g__unidentified_iii1-15	s__unidentified_iii1-15	New.CleanUp.ReferenceOTU98795
OTU28320	0	0	0	0	0	0	0	1	0	0	0	0	0	0	0	0	0	0	0	0	0	0	0	0	0	0	0	0	0	0	0	0	0	0	0	0	k__Bacteria	p__Acidobacteria	c__Acidobacteria-6	o__iii1-15	f__unidentified_iii1-15	g__unidentified_iii1-15	s__unidentified_iii1-15	New.CleanUp.ReferenceOTU99517
OTU28373	0	0	1	0	0	0	0	0	0	0	0	0	0	0	0	0	0	0	0	0	0	0	0	0	0	0	0	0	0	0	0	0	0	0	0	0	k__Bacteria	p__Acidobacteria	c__Acidobacteria-6	o__iii1-15	f__unidentified_iii1-15	g__unidentified_iii1-15	s__unidentified_iii1-15	New.CleanUp.ReferenceOTU99804
OTU28662	0	0	0	0	0	0	0	0	0	0	0	0	0	0	0	1	0	0	0	0	0	0	0	0	0	0	0	0	0	0	0	0	0	0	0	0	k__Bacteria	p__Acidobacteria	c__Acidobacteria-6	o__iii1-15	f__unidentified_iii1-15	g__unidentified_iii1-15	s__unidentified_iii1-15	New.CleanUp.ReferenceOTU101608
OTU28845	0	0	0	0	0	0	0	0	0	0	0	1	0	0	0	0	0	0	0	0	0	0	0	0	0	0	0	0	0	0	0	0	0	0	0	0	k__Bacteria	p__Acidobacteria	c__Acidobacteria-6	o__iii1-15	f__unidentified_iii1-15	g__unidentified_iii1-15	s__unidentified_iii1-15	New.CleanUp.ReferenceOTU102932
OTU28941	0	0	0	0	0	0	0	0	0	0	0	0	0	0	0	0	0	0	0	0	0	0	0	1	0	0	0	0	0	0	0	0	0	0	0	0	k__Bacteria	p__Acidobacteria	c__Acidobacteria-6	o__iii1-15	f__unidentified_iii1-15	g__unidentified_iii1-15	s__unidentified_iii1-15	New.CleanUp.ReferenceOTU103628
OTU28949	0	0	0	0	0	0	0	1	0	0	0	0	0	0	0	0	0	0	0	0	0	0	0	0	0	0	0	0	0	0	0	0	0	0	0	0	k__Bacteria	p__Acidobacteria	c__Acidobacteria-6	o__iii1-15	f__unidentified_iii1-15	g__unidentified_iii1-15	s__unidentified_iii1-15	New.CleanUp.ReferenceOTU103691
OTU29137	0	0	0	0	0	0	0	0	0	0	0	0	0	0	0	0	0	0	0	0	0	1	0	0	0	0	0	0	0	0	0	0	0	0	0	0	k__Bacteria	p__Acidobacteria	c__Acidobacteria-6	o__iii1-15	f__unidentified_iii1-15	g__unidentified_iii1-15	s__unidentified_iii1-15	New.CleanUp.ReferenceOTU104943
OTU29341	0	0	0	0	0	0	0	0	0	0	0	0	0	0	0	0	0	0	0	0	0	1	0	0	0	0	0	0	0	0	0	0	0	0	0	0	k__Bacteria	p__Acidobacteria	c__Acidobacteria-6	o__iii1-15	f__unidentified_iii1-15	g__unidentified_iii1-15	s__unidentified_iii1-15	New.CleanUp.ReferenceOTU106332
OTU29416	0	0	0	0	0	0	0	0	0	0	0	0	0	1	0	0	0	0	0	0	0	0	0	0	0	0	0	0	0	0	0	0	0	0	0	0	k__Bacteria	p__Acidobacteria	c__Acidobacteria-6	o__iii1-15	f__unidentified_iii1-15	g__unidentified_iii1-15	s__unidentified_iii1-15	New.CleanUp.ReferenceOTU106728
OTU29466	0	0	0	0	0	0	0	0	0	0	0	0	1	0	0	0	0	0	0	0	0	0	0	0	0	0	0	0	0	0	0	0	0	0	0	0	k__Bacteria	p__Acidobacteria	c__Acidobacteria-6	o__iii1-15	f__unidentified_iii1-15	g__unidentified_iii1-15	s__unidentified_iii1-15	New.CleanUp.ReferenceOTU107099
OTU29472	0	1	0	0	0	0	0	0	0	0	0	0	0	0	0	0	0	0	0	0	0	0	0	0	0	0	0	0	0	0	0	0	0	0	0	0	k__Bacteria	p__Acidobacteria	c__Acidobacteria-6	o__iii1-15	f__unidentified_iii1-15	g__unidentified_iii1-15	s__unidentified_iii1-15	New.CleanUp.ReferenceOTU107163
OTU29727	0	0	0	0	0	0	0	1	0	0	0	0	0	0	0	0	0	0	0	0	0	0	0	0	0	0	0	0	0	0	0	0	0	0	0	0	k__Bacteria	p__Acidobacteria	c__Acidobacteria-6	o__iii1-15	f__unidentified_iii1-15	g__unidentified_iii1-15	s__unidentified_iii1-15	New.CleanUp.ReferenceOTU108852
OTU29750	0	0	1	0	0	0	0	0	0	0	0	0	0	0	0	0	0	0	0	0	0	0	0	0	0	0	0	0	0	0	0	0	0	0	0	0	k__Bacteria	p__Acidobacteria	c__Acidobacteria-6	o__iii1-15	f__unidentified_iii1-15	g__unidentified_iii1-15	s__unidentified_iii1-15	New.CleanUp.ReferenceOTU108986
OTU29953	0	0	0	0	0	0	0	0	0	0	0	0	0	0	0	0	0	0	0	0	0	0	0	0	0	0	0	0	0	0	0	0	1	0	0	0	k__Bacteria	p__Acidobacteria	c__Acidobacteria-6	o__iii1-15	f__unidentified_iii1-15	g__unidentified_iii1-15	s__unidentified_iii1-15	New.CleanUp.ReferenceOTU110335
OTU29995	0	0	0	0	0	0	0	0	0	0	0	0	0	0	0	0	0	0	0	0	0	0	0	1	0	0	0	0	0	0	0	0	0	0	0	0	k__Bacteria	p__Acidobacteria	c__Acidobacteria-6	o__iii1-15	f__unidentified_iii1-15	g__unidentified_iii1-15	s__unidentified_iii1-15	New.CleanUp.ReferenceOTU110621
OTU30099	0	0	0	0	0	0	0	0	0	0	0	0	0	0	1	0	0	0	0	0	0	0	0	0	0	0	0	0	0	0	0	0	0	0	0	0	k__Bacteria	p__Acidobacteria	c__Acidobacteria-6	o__iii1-15	f__unidentified_iii1-15	g__unidentified_iii1-15	s__unidentified_iii1-15	New.CleanUp.ReferenceOTU111210
OTU30179	0	0	0	0	0	0	1	0	0	0	0	0	0	0	0	0	0	0	0	0	0	0	0	0	0	0	0	0	0	0	0	0	0	0	0	0	k__Bacteria	p__Acidobacteria	c__Acidobacteria-6	o__iii1-15	f__unidentified_iii1-15	g__unidentified_iii1-15	s__unidentified_iii1-15	New.CleanUp.ReferenceOTU111730
OTU30513	0	0	0	0	0	0	0	0	0	0	0	0	0	0	1	0	0	0	0	0	0	0	0	0	0	0	0	0	0	0	0	0	0	0	0	0	k__Bacteria	p__Acidobacteria	c__Acidobacteria-6	o__iii1-15	f__unidentified_iii1-15	g__unidentified_iii1-15	s__unidentified_iii1-15	New.CleanUp.ReferenceOTU113862
OTU30595	0	0	0	0	0	0	0	0	0	0	0	0	1	0	0	0	0	0	0	0	0	0	0	0	0	0	0	0	0	0	0	0	0	0	0	0	k__Bacteria	p__Acidobacteria	c__Acidobacteria-6	o__iii1-15	f__unidentified_iii1-15	g__unidentified_iii1-15	s__unidentified_iii1-15	New.CleanUp.ReferenceOTU114316
OTU30749	0	0	0	0	0	0	0	0	0	0	0	0	0	0	0	1	0	0	0	0	0	0	0	0	0	0	0	0	0	0	0	0	0	0	0	0	k__Bacteria	p__Acidobacteria	c__Acidobacteria-6	o__iii1-15	f__unidentified_iii1-15	g__unidentified_iii1-15	s__unidentified_iii1-15	New.CleanUp.ReferenceOTU115206
OTU30832	1	0	0	0	0	0	0	0	0	0	0	0	0	0	0	0	0	0	0	0	0	0	0	0	0	0	0	0	0	0	0	0	0	0	0	0	k__Bacteria	p__Acidobacteria	c__Acidobacteria-6	o__iii1-15	f__unidentified_iii1-15	g__unidentified_iii1-15	s__unidentified_iii1-15	New.CleanUp.ReferenceOTU115767
OTU31096	1	0	0	0	0	0	0	0	0	0	0	0	0	0	0	0	0	0	0	0	0	0	0	0	0	0	0	0	0	0	0	0	0	0	0	0	k__Bacteria	p__Acidobacteria	c__Acidobacteria-6	o__iii1-15	f__unidentified_iii1-15	g__unidentified_iii1-15	s__unidentified_iii1-15	New.CleanUp.ReferenceOTU117286
OTU31152	0	0	0	0	0	0	0	0	0	0	0	0	0	0	0	0	0	0	0	1	0	0	0	0	0	0	0	0	0	0	0	0	0	0	0	0	k__Bacteria	p__Acidobacteria	c__Acidobacteria-6	o__iii1-15	f__unidentified_iii1-15	g__unidentified_iii1-15	s__unidentified_iii1-15	New.CleanUp.ReferenceOTU117798
OTU31297	1	0	0	0	0	0	0	0	0	0	0	0	0	0	0	0	0	0	0	0	0	0	0	0	0	0	0	0	0	0	0	0	0	0	0	0	k__Bacteria	p__Acidobacteria	c__Acidobacteria-6	o__iii1-15	f__unidentified_iii1-15	g__unidentified_iii1-15	s__unidentified_iii1-15	New.CleanUp.ReferenceOTU118736
OTU31306	0	0	1	0	0	0	0	0	0	0	0	0	0	0	0	0	0	0	0	0	0	0	0	0	0	0	0	0	0	0	0	0	0	0	0	0	k__Bacteria	p__Acidobacteria	c__Acidobacteria-6	o__iii1-15	f__unidentified_iii1-15	g__unidentified_iii1-15	s__unidentified_iii1-15	New.CleanUp.ReferenceOTU118826
OTU31341	1	0	0	0	0	0	0	0	0	0	0	0	0	0	0	0	0	0	0	0	0	0	0	0	0	0	0	0	0	0	0	0	0	0	0	0	k__Bacteria	p__Acidobacteria	c__Acidobacteria-6	o__iii1-15	f__unidentified_iii1-15	g__unidentified_iii1-15	s__unidentified_iii1-15	New.CleanUp.ReferenceOTU119058
OTU31433	0	0	0	0	0	0	0	0	0	0	0	0	0	0	0	0	0	0	0	1	0	0	0	0	0	0	0	0	0	0	0	0	0	0	0	0	k__Bacteria	p__Acidobacteria	c__Acidobacteria-6	o__iii1-15	f__unidentified_iii1-15	g__unidentified_iii1-15	s__unidentified_iii1-15	New.CleanUp.ReferenceOTU119587
OTU31468	0	0	0	0	0	0	0	0	0	0	0	0	0	0	0	0	0	0	0	0	1	0	0	0	0	0	0	0	0	0	0	0	0	0	0	0	k__Bacteria	p__Acidobacteria	c__Acidobacteria-6	o__iii1-15	f__unidentified_iii1-15	g__unidentified_iii1-15	s__unidentified_iii1-15	New.CleanUp.ReferenceOTU119840
OTU31618	0	0	0	0	0	0	0	0	0	0	0	0	0	0	0	0	0	1	0	0	0	0	0	0	0	0	0	0	0	0	0	0	0	0	0	0	k__Bacteria	p__Acidobacteria	c__Acidobacteria-6	o__iii1-15	f__unidentified_iii1-15	g__unidentified_iii1-15	s__unidentified_iii1-15	New.CleanUp.ReferenceOTU120864
OTU32596	0	0	0	0	0	0	0	0	0	0	1	0	0	0	0	0	0	0	0	0	0	0	0	0	0	0	0	0	0	0	0	0	0	0	0	0	k__Bacteria	p__Acidobacteria	c__Acidobacteria-6	o__iii1-15	f__unidentified_iii1-15	g__unidentified_iii1-15	s__unidentified_iii1-15	New.CleanUp.ReferenceOTU127316
OTU32781	0	0	0	0	0	0	0	0	0	0	0	0	0	0	1	0	0	0	0	0	0	0	0	0	0	0	0	0	0	0	0	0	0	0	0	0	k__Bacteria	p__Acidobacteria	c__Acidobacteria-6	o__iii1-15	f__unidentified_iii1-15	g__unidentified_iii1-15	s__unidentified_iii1-15	New.CleanUp.ReferenceOTU128550
OTU32973	0	0	0	0	0	0	0	0	0	0	0	0	0	0	1	0	0	0	0	0	0	0	0	0	0	0	0	0	0	0	0	0	0	0	0	0	k__Bacteria	p__Acidobacteria	c__Acidobacteria-6	o__iii1-15	f__unidentified_iii1-15	g__unidentified_iii1-15	s__unidentified_iii1-15	New.CleanUp.ReferenceOTU129743
OTU33126	0	0	0	0	0	0	0	0	0	0	0	0	0	0	0	0	0	0	0	0	0	0	0	1	0	0	0	0	0	0	0	0	0	0	0	0	k__Bacteria	p__Acidobacteria	c__Acidobacteria-6	o__iii1-15	f__unidentified_iii1-15	g__unidentified_iii1-15	s__unidentified_iii1-15	New.CleanUp.ReferenceOTU130796
OTU33223	0	0	0	0	0	0	0	0	1	0	0	0	0	0	0	0	0	0	0	0	0	0	0	0	0	0	0	0	0	0	0	0	0	0	0	0	k__Bacteria	p__Acidobacteria	c__Acidobacteria-6	o__iii1-15	f__unidentified_iii1-15	g__unidentified_iii1-15	s__unidentified_iii1-15	New.CleanUp.ReferenceOTU131424
OTU33246	0	0	0	0	0	0	0	0	0	0	0	0	0	0	0	0	0	0	0	0	1	0	0	0	0	0	0	0	0	0	0	0	0	0	0	0	k__Bacteria	p__Acidobacteria	c__Acidobacteria-6	o__iii1-15	f__unidentified_iii1-15	g__unidentified_iii1-15	s__unidentified_iii1-15	New.CleanUp.ReferenceOTU131548
OTU33382	0	0	0	0	0	1	0	0	0	0	0	0	0	0	0	0	0	0	0	0	0	0	0	0	0	0	0	0	0	0	0	0	0	0	0	0	k__Bacteria	p__Acidobacteria	c__Acidobacteria-6	o__iii1-15	f__unidentified_iii1-15	g__unidentified_iii1-15	s__unidentified_iii1-15	New.CleanUp.ReferenceOTU132559
OTU33700	0	0	0	0	0	0	0	0	0	0	0	0	0	0	0	0	0	0	0	0	0	0	0	0	0	0	0	0	0	0	0	0	0	0	0	1	k__Bacteria	p__Acidobacteria	c__Acidobacteria-6	o__iii1-15	f__unidentified_iii1-15	g__unidentified_iii1-15	s__unidentified_iii1-15	New.CleanUp.ReferenceOTU134711
OTU34096	0	0	0	0	0	0	0	0	0	0	0	0	0	0	0	0	0	0	0	0	0	1	0	0	0	0	0	0	0	0	0	0	0	0	0	0	k__Bacteria	p__Acidobacteria	c__Acidobacteria-6	o__iii1-15	f__unidentified_iii1-15	g__unidentified_iii1-15	s__unidentified_iii1-15	New.CleanUp.ReferenceOTU137377
OTU34110	0	0	0	0	0	0	0	0	0	0	0	1	0	0	0	0	0	0	0	0	0	0	0	0	0	0	0	0	0	0	0	0	0	0	0	0	k__Bacteria	p__Acidobacteria	c__Acidobacteria-6	o__iii1-15	f__unidentified_iii1-15	g__unidentified_iii1-15	s__unidentified_iii1-15	New.CleanUp.ReferenceOTU137461
OTU34305	0	0	0	0	0	0	0	0	0	0	0	0	0	0	0	0	0	1	0	0	0	0	0	0	0	0	0	0	0	0	0	0	0	0	0	0	k__Bacteria	p__Acidobacteria	c__Acidobacteria-6	o__iii1-15	f__unidentified_iii1-15	g__unidentified_iii1-15	s__unidentified_iii1-15	New.CleanUp.ReferenceOTU138768
OTU34399	0	0	0	0	0	0	0	0	0	0	0	0	0	1	0	0	0	0	0	0	0	0	0	0	0	0	0	0	0	0	0	0	0	0	0	0	k__Bacteria	p__Acidobacteria	c__Acidobacteria-6	o__iii1-15	f__unidentified_iii1-15	g__unidentified_iii1-15	s__unidentified_iii1-15	New.CleanUp.ReferenceOTU139436
OTU34401	0	1	0	0	0	0	0	0	0	0	0	0	0	0	0	0	0	0	0	0	0	0	0	0	0	0	0	0	0	0	0	0	0	0	0	0	k__Bacteria	p__Acidobacteria	c__Acidobacteria-6	o__iii1-15	f__unidentified_iii1-15	g__unidentified_iii1-15	s__unidentified_iii1-15	New.CleanUp.ReferenceOTU139456
OTU34525	0	0	0	0	0	0	0	1	0	0	0	0	0	0	0	0	0	0	0	0	0	0	0	0	0	0	0	0	0	0	0	0	0	0	0	0	k__Bacteria	p__Acidobacteria	c__Acidobacteria-6	o__iii1-15	f__unidentified_iii1-15	g__unidentified_iii1-15	s__unidentified_iii1-15	New.CleanUp.ReferenceOTU140191
OTU34700	0	0	0	0	0	0	0	0	0	0	0	0	0	0	0	0	0	0	0	0	0	0	0	0	0	1	0	0	0	0	0	0	0	0	0	0	k__Bacteria	p__Acidobacteria	c__Acidobacteria-6	o__iii1-15	f__unidentified_iii1-15	g__unidentified_iii1-15	s__unidentified_iii1-15	New.CleanUp.ReferenceOTU141233
OTU35379	0	0	0	0	0	0	0	0	0	0	0	0	0	0	0	0	1	0	0	0	0	0	0	0	0	0	0	0	0	0	0	0	0	0	0	0	k__Bacteria	p__Acidobacteria	c__Acidobacteria-6	o__iii1-15	f__unidentified_iii1-15	g__unidentified_iii1-15	s__unidentified_iii1-15	New.CleanUp.ReferenceOTU145511
OTU35541	0	0	0	0	0	0	0	0	0	0	0	0	0	0	1	0	0	0	0	0	0	0	0	0	0	0	0	0	0	0	0	0	0	0	0	0	k__Bacteria	p__Acidobacteria	c__Acidobacteria-6	o__iii1-15	f__unidentified_iii1-15	g__unidentified_iii1-15	s__unidentified_iii1-15	New.CleanUp.ReferenceOTU146664
OTU35550	0	0	0	0	0	0	0	0	0	0	0	0	0	0	0	0	0	0	0	0	1	0	0	0	0	0	0	0	0	0	0	0	0	0	0	0	k__Bacteria	p__Acidobacteria	c__Acidobacteria-6	o__iii1-15	f__unidentified_iii1-15	g__unidentified_iii1-15	s__unidentified_iii1-15	New.CleanUp.ReferenceOTU146709
OTU35633	0	0	0	0	0	0	0	0	0	0	0	0	0	0	0	1	0	0	0	0	0	0	0	0	0	0	0	0	0	0	0	0	0	0	0	0	k__Bacteria	p__Acidobacteria	c__Acidobacteria-6	o__iii1-15	f__unidentified_iii1-15	g__unidentified_iii1-15	s__unidentified_iii1-15	New.CleanUp.ReferenceOTU147317
OTU35909	0	0	0	0	0	0	0	0	0	0	0	0	0	0	0	0	0	0	0	0	0	0	1	0	0	0	0	0	0	0	0	0	0	0	0	0	k__Bacteria	p__Acidobacteria	c__Acidobacteria-6	o__iii1-15	f__unidentified_iii1-15	g__unidentified_iii1-15	s__unidentified_iii1-15	New.CleanUp.ReferenceOTU148993
OTU35934	0	0	0	0	0	0	0	0	0	1	0	0	0	0	0	0	0	0	0	0	0	0	0	0	0	0	0	0	0	0	0	0	0	0	0	0	k__Bacteria	p__Acidobacteria	c__Acidobacteria-6	o__iii1-15	f__unidentified_iii1-15	g__unidentified_iii1-15	s__unidentified_iii1-15	New.CleanUp.ReferenceOTU149191
OTU36083	1	0	0	0	0	0	0	0	0	0	0	0	0	0	0	0	0	0	0	0	0	0	0	0	0	0	0	0	0	0	0	0	0	0	0	0	k__Bacteria	p__Acidobacteria	c__Acidobacteria-6	o__iii1-15	f__unidentified_iii1-15	g__unidentified_iii1-15	s__unidentified_iii1-15	New.CleanUp.ReferenceOTU150195
OTU36155	0	0	0	0	0	0	0	0	0	0	0	0	0	1	0	0	0	0	0	0	0	0	0	0	0	0	0	0	0	0	0	0	0	0	0	0	k__Bacteria	p__Acidobacteria	c__Acidobacteria-6	o__iii1-15	f__unidentified_iii1-15	g__unidentified_iii1-15	s__unidentified_iii1-15	New.CleanUp.ReferenceOTU150693
OTU36191	0	0	1	0	0	0	0	0	0	0	0	0	0	0	0	0	0	0	0	0	0	0	0	0	0	0	0	0	0	0	0	0	0	0	0	0	k__Bacteria	p__Acidobacteria	c__Acidobacteria-6	o__iii1-15	f__unidentified_iii1-15	g__unidentified_iii1-15	s__unidentified_iii1-15	New.CleanUp.ReferenceOTU151038
OTU36246	0	0	0	0	0	0	0	0	0	0	0	0	0	0	1	0	0	0	0	0	0	0	0	0	0	0	0	0	0	0	0	0	0	0	0	0	k__Bacteria	p__Acidobacteria	c__Acidobacteria-6	o__iii1-15	f__unidentified_iii1-15	g__unidentified_iii1-15	s__unidentified_iii1-15	New.CleanUp.ReferenceOTU151377
OTU36301	0	0	0	0	0	0	0	0	0	0	0	0	0	0	0	0	0	0	0	0	0	0	0	1	0	0	0	0	0	0	0	0	0	0	0	0	k__Bacteria	p__Acidobacteria	c__Acidobacteria-6	o__iii1-15	f__unidentified_iii1-15	g__unidentified_iii1-15	s__unidentified_iii1-15	New.CleanUp.ReferenceOTU151784
OTU36368	0	0	0	0	0	0	0	0	0	0	0	0	0	0	0	0	0	0	0	0	0	0	0	0	0	0	0	0	0	0	0	0	0	0	1	0	k__Bacteria	p__Acidobacteria	c__Acidobacteria-6	o__iii1-15	f__unidentified_iii1-15	g__unidentified_iii1-15	s__unidentified_iii1-15	New.CleanUp.ReferenceOTU152168
OTU36399	1	0	0	0	0	0	0	0	0	0	0	0	0	0	0	0	0	0	0	0	0	0	0	0	0	0	0	0	0	0	0	0	0	0	0	0	k__Bacteria	p__Acidobacteria	c__Acidobacteria-6	o__iii1-15	f__unidentified_iii1-15	g__unidentified_iii1-15	s__unidentified_iii1-15	New.CleanUp.ReferenceOTU152328
OTU36443	0	0	0	0	0	0	0	0	0	1	0	0	0	0	0	0	0	0	0	0	0	0	0	0	0	0	0	0	0	0	0	0	0	0	0	0	k__Bacteria	p__Acidobacteria	c__Acidobacteria-6	o__iii1-15	f__unidentified_iii1-15	g__unidentified_iii1-15	s__unidentified_iii1-15	New.CleanUp.ReferenceOTU152732
OTU36448	0	0	0	0	0	0	0	1	0	0	0	0	0	0	0	0	0	0	0	0	0	0	0	0	0	0	0	0	0	0	0	0	0	0	0	0	k__Bacteria	p__Acidobacteria	c__Acidobacteria-6	o__iii1-15	f__unidentified_iii1-15	g__unidentified_iii1-15	s__unidentified_iii1-15	New.CleanUp.ReferenceOTU152746
OTU36490	0	0	0	0	0	0	0	1	0	0	0	0	0	0	0	0	0	0	0	0	0	0	0	0	0	0	0	0	0	0	0	0	0	0	0	0	k__Bacteria	p__Acidobacteria	c__Acidobacteria-6	o__iii1-15	f__unidentified_iii1-15	g__unidentified_iii1-15	s__unidentified_iii1-15	New.CleanUp.ReferenceOTU153026
OTU36641	0	0	0	0	0	0	0	0	0	0	0	0	0	0	0	0	0	0	0	0	0	0	0	1	0	0	0	0	0	0	0	0	0	0	0	0	k__Bacteria	p__Acidobacteria	c__Acidobacteria-6	o__iii1-15	f__unidentified_iii1-15	g__unidentified_iii1-15	s__unidentified_iii1-15	New.CleanUp.ReferenceOTU154126
OTU36704	1	0	0	0	0	0	0	0	0	0	0	0	0	0	0	0	0	0	0	0	0	0	0	0	0	0	0	0	0	0	0	0	0	0	0	0	k__Bacteria	p__Acidobacteria	c__Acidobacteria-6	o__iii1-15	f__unidentified_iii1-15	g__unidentified_iii1-15	s__unidentified_iii1-15	New.CleanUp.ReferenceOTU154566
OTU36858	0	0	0	0	0	0	1	0	0	0	0	0	0	0	0	0	0	0	0	0	0	0	0	0	0	0	0	0	0	0	0	0	0	0	0	0	k__Bacteria	p__Acidobacteria	c__Acidobacteria-6	o__iii1-15	f__unidentified_iii1-15	g__unidentified_iii1-15	s__unidentified_iii1-15	New.CleanUp.ReferenceOTU155625
OTU37287	0	0	0	0	0	0	0	0	0	0	0	0	0	0	0	0	0	0	0	0	1	0	0	0	0	0	0	0	0	0	0	0	0	0	0	0	k__Bacteria	p__Acidobacteria	c__Acidobacteria-6	o__iii1-15	f__unidentified_iii1-15	g__unidentified_iii1-15	s__unidentified_iii1-15	New.CleanUp.ReferenceOTU158265
OTU37519	0	0	0	0	1	0	0	0	0	0	0	0	0	0	0	0	0	0	0	0	0	0	0	0	0	0	0	0	0	0	0	0	0	0	0	0	k__Bacteria	p__Acidobacteria	c__Acidobacteria-6	o__iii1-15	f__unidentified_iii1-15	g__unidentified_iii1-15	s__unidentified_iii1-15	New.CleanUp.ReferenceOTU159904
OTU37591	0	0	0	0	0	0	0	0	0	0	0	0	0	0	0	0	0	0	0	0	0	1	0	0	0	0	0	0	0	0	0	0	0	0	0	0	k__Bacteria	p__Acidobacteria	c__Acidobacteria-6	o__iii1-15	f__unidentified_iii1-15	g__unidentified_iii1-15	s__unidentified_iii1-15	New.CleanUp.ReferenceOTU160459
OTU37667	0	0	0	0	0	0	0	0	0	0	0	1	0	0	0	0	0	0	0	0	0	0	0	0	0	0	0	0	0	0	0	0	0	0	0	0	k__Bacteria	p__Acidobacteria	c__Acidobacteria-6	o__iii1-15	f__unidentified_iii1-15	g__unidentified_iii1-15	s__unidentified_iii1-15	New.CleanUp.ReferenceOTU160991
OTU37689	0	0	0	0	0	0	0	0	0	0	0	0	0	0	0	1	0	0	0	0	0	0	0	0	0	0	0	0	0	0	0	0	0	0	0	0	k__Bacteria	p__Acidobacteria	c__Acidobacteria-6	o__iii1-15	f__unidentified_iii1-15	g__unidentified_iii1-15	s__unidentified_iii1-15	New.CleanUp.ReferenceOTU161109
OTU37741	0	0	0	0	0	0	0	0	0	0	0	0	0	0	1	0	0	0	0	0	0	0	0	0	0	0	0	0	0	0	0	0	0	0	0	0	k__Bacteria	p__Acidobacteria	c__Acidobacteria-6	o__iii1-15	f__unidentified_iii1-15	g__unidentified_iii1-15	s__unidentified_iii1-15	New.CleanUp.ReferenceOTU161382
OTU37768	0	0	0	0	0	0	0	0	0	0	0	0	0	0	0	1	0	0	0	0	0	0	0	0	0	0	0	0	0	0	0	0	0	0	0	0	k__Bacteria	p__Acidobacteria	c__Acidobacteria-6	o__iii1-15	f__unidentified_iii1-15	g__unidentified_iii1-15	s__unidentified_iii1-15	New.CleanUp.ReferenceOTU161562
OTU37861	0	0	0	0	0	0	0	0	0	0	0	0	0	0	0	0	1	0	0	0	0	0	0	0	0	0	0	0	0	0	0	0	0	0	0	0	k__Bacteria	p__Acidobacteria	c__Acidobacteria-6	o__iii1-15	f__unidentified_iii1-15	g__unidentified_iii1-15	s__unidentified_iii1-15	New.CleanUp.ReferenceOTU162170
OTU37876	0	0	0	0	0	0	0	0	0	0	0	0	1	0	0	0	0	0	0	0	0	0	0	0	0	0	0	0	0	0	0	0	0	0	0	0	k__Bacteria	p__Acidobacteria	c__Acidobacteria-6	o__iii1-15	f__unidentified_iii1-15	g__unidentified_iii1-15	s__unidentified_iii1-15	New.CleanUp.ReferenceOTU162271
OTU38291	1	0	0	0	0	0	0	0	0	0	0	0	0	0	0	0	0	0	0	0	0	0	0	0	0	0	0	0	0	0	0	0	0	0	0	0	k__Bacteria	p__Acidobacteria	c__Acidobacteria-6	o__iii1-15	f__unidentified_iii1-15	g__unidentified_iii1-15	s__unidentified_iii1-15	New.CleanUp.ReferenceOTU165032
OTU38466	0	0	0	0	0	0	0	0	0	0	0	0	0	0	0	0	0	0	0	0	1	0	0	0	0	0	0	0	0	0	0	0	0	0	0	0	k__Bacteria	p__Acidobacteria	c__Acidobacteria-6	o__iii1-15	f__unidentified_iii1-15	g__unidentified_iii1-15	s__unidentified_iii1-15	New.CleanUp.ReferenceOTU166169
OTU38659	1	0	0	0	0	0	0	0	0	0	0	0	0	0	0	0	0	0	0	0	0	0	0	0	0	0	0	0	0	0	0	0	0	0	0	0	k__Bacteria	p__Acidobacteria	c__Acidobacteria-6	o__iii1-15	f__unidentified_iii1-15	g__unidentified_iii1-15	s__unidentified_iii1-15	New.CleanUp.ReferenceOTU167438
OTU38704	1	0	0	0	0	0	0	0	0	0	0	0	0	0	0	0	0	0	0	0	0	0	0	0	0	0	0	0	0	0	0	0	0	0	0	0	k__Bacteria	p__Acidobacteria	c__Acidobacteria-6	o__iii1-15	f__unidentified_iii1-15	g__unidentified_iii1-15	s__unidentified_iii1-15	New.CleanUp.ReferenceOTU167747
OTU38745	0	0	0	0	0	0	0	0	0	0	0	0	0	0	0	0	0	0	0	0	0	0	0	1	0	0	0	0	0	0	0	0	0	0	0	0	k__Bacteria	p__Acidobacteria	c__Acidobacteria-6	o__iii1-15	f__unidentified_iii1-15	g__unidentified_iii1-15	s__unidentified_iii1-15	New.CleanUp.ReferenceOTU168061
OTU38847	0	0	0	0	0	0	0	0	0	0	0	0	0	0	0	0	0	0	0	0	0	1	0	0	0	0	0	0	0	0	0	0	0	0	0	0	k__Bacteria	p__Acidobacteria	c__Acidobacteria-6	o__iii1-15	f__unidentified_iii1-15	g__unidentified_iii1-15	s__unidentified_iii1-15	New.CleanUp.ReferenceOTU168735
OTU38982	0	0	0	0	0	0	0	0	0	0	0	0	0	0	0	0	0	0	0	0	1	0	0	0	0	0	0	0	0	0	0	0	0	0	0	0	k__Bacteria	p__Acidobacteria	c__Acidobacteria-6	o__iii1-15	f__unidentified_iii1-15	g__unidentified_iii1-15	s__unidentified_iii1-15	New.CleanUp.ReferenceOTU169587
OTU39028	0	0	0	0	0	0	0	0	0	0	0	1	0	0	0	0	0	0	0	0	0	0	0	0	0	0	0	0	0	0	0	0	0	0	0	0	k__Bacteria	p__Acidobacteria	c__Acidobacteria-6	o__iii1-15	f__unidentified_iii1-15	g__unidentified_iii1-15	s__unidentified_iii1-15	New.CleanUp.ReferenceOTU169996
OTU39262	0	0	0	0	0	0	0	0	0	0	0	0	0	0	0	0	0	0	0	1	0	0	0	0	0	0	0	0	0	0	0	0	0	0	0	0	k__Bacteria	p__Acidobacteria	c__Acidobacteria-6	o__iii1-15	f__unidentified_iii1-15	g__unidentified_iii1-15	s__unidentified_iii1-15	New.CleanUp.ReferenceOTU171566
OTU39272	0	0	0	0	0	0	0	0	0	1	0	0	0	0	0	0	0	0	0	0	0	0	0	0	0	0	0	0	0	0	0	0	0	0	0	0	k__Bacteria	p__Acidobacteria	c__Acidobacteria-6	o__iii1-15	f__unidentified_iii1-15	g__unidentified_iii1-15	s__unidentified_iii1-15	New.CleanUp.ReferenceOTU171630
OTU39414	1	0	0	0	0	0	0	0	0	0	0	0	0	0	0	0	0	0	0	0	0	0	0	0	0	0	0	0	0	0	0	0	0	0	0	0	k__Bacteria	p__Acidobacteria	c__Acidobacteria-6	o__iii1-15	f__unidentified_iii1-15	g__unidentified_iii1-15	s__unidentified_iii1-15	New.CleanUp.ReferenceOTU172448
OTU39424	0	0	0	0	0	0	0	0	1	0	0	0	0	0	0	0	0	0	0	0	0	0	0	0	0	0	0	0	0	0	0	0	0	0	0	0	k__Bacteria	p__Acidobacteria	c__Acidobacteria-6	o__iii1-15	f__unidentified_iii1-15	g__unidentified_iii1-15	s__unidentified_iii1-15	New.CleanUp.ReferenceOTU172522
OTU39913	0	0	0	0	0	0	0	1	0	0	0	0	0	0	0	0	0	0	0	0	0	0	0	0	0	0	0	0	0	0	0	0	0	0	0	0	k__Bacteria	p__Acidobacteria	c__Acidobacteria-6	o__iii1-15	f__unidentified_iii1-15	g__unidentified_iii1-15	s__unidentified_iii1-15	New.CleanUp.ReferenceOTU175584
OTU39996	1	0	0	0	0	0	0	0	0	0	0	0	0	0	0	0	0	0	0	0	0	0	0	0	0	0	0	0	0	0	0	0	0	0	0	0	k__Bacteria	p__Acidobacteria	c__Acidobacteria-6	o__iii1-15	f__unidentified_iii1-15	g__unidentified_iii1-15	s__unidentified_iii1-15	New.CleanUp.ReferenceOTU175964
OTU40012	0	1	0	0	0	0	0	0	0	0	0	0	0	0	0	0	0	0	0	0	0	0	0	0	0	0	0	0	0	0	0	0	0	0	0	0	k__Bacteria	p__Acidobacteria	c__Acidobacteria-6	o__iii1-15	f__unidentified_iii1-15	g__unidentified_iii1-15	s__unidentified_iii1-15	New.CleanUp.ReferenceOTU176028
OTU40211	0	0	0	1	0	0	0	0	0	0	0	0	0	0	0	0	0	0	0	0	0	0	0	0	0	0	0	0	0	0	0	0	0	0	0	0	k__Bacteria	p__Acidobacteria	c__Acidobacteria-6	o__iii1-15	f__unidentified_iii1-15	g__unidentified_iii1-15	s__unidentified_iii1-15	New.CleanUp.ReferenceOTU177171
OTU40461	0	0	0	0	0	0	0	0	0	0	0	0	0	0	0	1	0	0	0	0	0	0	0	0	0	0	0	0	0	0	0	0	0	0	0	0	k__Bacteria	p__Acidobacteria	c__Acidobacteria-6	o__iii1-15	f__unidentified_iii1-15	g__unidentified_iii1-15	s__unidentified_iii1-15	New.CleanUp.ReferenceOTU178632
OTU41034	0	0	0	0	0	0	0	0	0	0	0	0	0	0	0	0	0	1	0	0	0	0	0	0	0	0	0	0	0	0	0	0	0	0	0	0	k__Bacteria	p__Acidobacteria	c__Acidobacteria-6	o__iii1-15	f__unidentified_iii1-15	g__unidentified_iii1-15	s__unidentified_iii1-15	New.CleanUp.ReferenceOTU181859
OTU41053	0	0	0	0	0	0	0	0	0	0	0	0	0	1	0	0	0	0	0	0	0	0	0	0	0	0	0	0	0	0	0	0	0	0	0	0	k__Bacteria	p__Acidobacteria	c__Acidobacteria-6	o__iii1-15	f__unidentified_iii1-15	g__unidentified_iii1-15	s__unidentified_iii1-15	New.CleanUp.ReferenceOTU181948
OTU41104	1	0	0	0	0	0	0	0	0	0	0	0	0	0	0	0	0	0	0	0	0	0	0	0	0	0	0	0	0	0	0	0	0	0	0	0	k__Bacteria	p__Acidobacteria	c__Acidobacteria-6	o__iii1-15	f__unidentified_iii1-15	g__unidentified_iii1-15	s__unidentified_iii1-15	New.CleanUp.ReferenceOTU182209
OTU41107	0	0	0	0	0	0	0	0	0	0	0	0	0	0	0	0	0	0	0	1	0	0	0	0	0	0	0	0	0	0	0	0	0	0	0	0	k__Bacteria	p__Acidobacteria	c__Acidobacteria-6	o__iii1-15	f__unidentified_iii1-15	g__unidentified_iii1-15	s__unidentified_iii1-15	New.CleanUp.ReferenceOTU182214
OTU41390	0	0	0	0	0	0	0	0	0	0	0	0	0	0	0	0	0	0	0	0	0	0	0	1	0	0	0	0	0	0	0	0	0	0	0	0	k__Bacteria	p__Acidobacteria	c__Acidobacteria-6	o__iii1-15	f__unidentified_iii1-15	g__unidentified_iii1-15	s__unidentified_iii1-15	New.CleanUp.ReferenceOTU183992
OTU41757	0	0	0	0	0	0	0	1	0	0	0	0	0	0	0	0	0	0	0	0	0	0	0	0	0	0	0	0	0	0	0	0	0	0	0	0	k__Bacteria	p__Acidobacteria	c__Acidobacteria-6	o__iii1-15	f__unidentified_iii1-15	g__unidentified_iii1-15	s__unidentified_iii1-15	New.CleanUp.ReferenceOTU186308
OTU41791	0	0	0	0	0	0	0	0	0	0	0	0	0	0	0	0	0	0	0	0	0	1	0	0	0	0	0	0	0	0	0	0	0	0	0	0	k__Bacteria	p__Acidobacteria	c__Acidobacteria-6	o__iii1-15	f__unidentified_iii1-15	g__unidentified_iii1-15	s__unidentified_iii1-15	New.CleanUp.ReferenceOTU186538
OTU41981	0	0	1	0	0	0	0	0	0	0	0	0	0	0	0	0	0	0	0	0	0	0	0	0	0	0	0	0	0	0	0	0	0	0	0	0	k__Bacteria	p__Acidobacteria	c__Acidobacteria-6	o__iii1-15	f__unidentified_iii1-15	g__unidentified_iii1-15	s__unidentified_iii1-15	New.CleanUp.ReferenceOTU187692
OTU42069	0	0	0	0	0	0	0	0	0	0	0	0	0	0	0	0	0	1	0	0	0	0	0	0	0	0	0	0	0	0	0	0	0	0	0	0	k__Bacteria	p__Acidobacteria	c__Acidobacteria-6	o__iii1-15	f__unidentified_iii1-15	g__unidentified_iii1-15	s__unidentified_iii1-15	New.CleanUp.ReferenceOTU188185
OTU42189	0	0	0	0	0	0	0	0	0	0	0	0	0	0	1	0	0	0	0	0	0	0	0	0	0	0	0	0	0	0	0	0	0	0	0	0	k__Bacteria	p__Acidobacteria	c__Acidobacteria-6	o__iii1-15	f__unidentified_iii1-15	g__unidentified_iii1-15	s__unidentified_iii1-15	New.CleanUp.ReferenceOTU188886
OTU42304	1	0	0	0	0	0	0	0	0	0	0	0	0	0	0	0	0	0	0	0	0	0	0	0	0	0	0	0	0	0	0	0	0	0	0	0	k__Bacteria	p__Acidobacteria	c__Acidobacteria-6	o__iii1-15	f__unidentified_iii1-15	g__unidentified_iii1-15	s__unidentified_iii1-15	New.CleanUp.ReferenceOTU189616
OTU42331	0	0	0	0	0	0	0	0	0	0	0	1	0	0	0	0	0	0	0	0	0	0	0	0	0	0	0	0	0	0	0	0	0	0	0	0	k__Bacteria	p__Acidobacteria	c__Acidobacteria-6	o__iii1-15	f__unidentified_iii1-15	g__unidentified_iii1-15	s__unidentified_iii1-15	New.CleanUp.ReferenceOTU189733
OTU42547	0	0	0	0	0	0	0	0	0	0	0	0	0	0	1	0	0	0	0	0	0	0	0	0	0	0	0	0	0	0	0	0	0	0	0	0	k__Bacteria	p__Acidobacteria	c__Acidobacteria-6	o__iii1-15	f__unidentified_iii1-15	g__unidentified_iii1-15	s__unidentified_iii1-15	New.CleanUp.ReferenceOTU191014
OTU42665	0	1	0	0	0	0	0	0	0	0	0	0	0	0	0	0	0	0	0	0	0	0	0	0	0	0	0	0	0	0	0	0	0	0	0	0	k__Bacteria	p__Acidobacteria	c__Acidobacteria-6	o__iii1-15	f__unidentified_iii1-15	g__unidentified_iii1-15	s__unidentified_iii1-15	New.CleanUp.ReferenceOTU191703
OTU42670	0	0	0	0	0	0	0	0	0	0	0	0	0	0	0	0	0	0	0	1	0	0	0	0	0	0	0	0	0	0	0	0	0	0	0	0	k__Bacteria	p__Acidobacteria	c__Acidobacteria-6	o__iii1-15	f__unidentified_iii1-15	g__unidentified_iii1-15	s__unidentified_iii1-15	New.CleanUp.ReferenceOTU191738
OTU42890	0	0	0	0	0	0	0	0	0	0	0	0	0	0	0	0	0	0	0	0	0	0	0	0	0	0	1	0	0	0	0	0	0	0	0	0	k__Bacteria	p__Acidobacteria	c__Acidobacteria-6	o__iii1-15	f__unidentified_iii1-15	g__unidentified_iii1-15	s__unidentified_iii1-15	New.CleanUp.ReferenceOTU193001
OTU43041	0	0	0	0	0	0	0	0	0	0	0	0	0	1	0	0	0	0	0	0	0	0	0	0	0	0	0	0	0	0	0	0	0	0	0	0	k__Bacteria	p__Acidobacteria	c__Acidobacteria-6	o__iii1-15	f__unidentified_iii1-15	g__unidentified_iii1-15	s__unidentified_iii1-15	New.CleanUp.ReferenceOTU193804
OTU43195	0	0	0	0	0	1	0	0	0	0	0	0	0	0	0	0	0	0	0	0	0	0	0	0	0	0	0	0	0	0	0	0	0	0	0	0	k__Bacteria	p__Acidobacteria	c__Acidobacteria-6	o__iii1-15	f__unidentified_iii1-15	g__unidentified_iii1-15	s__unidentified_iii1-15	New.CleanUp.ReferenceOTU194729
OTU43627	0	0	0	0	0	0	0	0	0	0	0	0	0	0	0	0	0	0	0	1	0	0	0	0	0	0	0	0	0	0	0	0	0	0	0	0	k__Bacteria	p__Acidobacteria	c__Acidobacteria-6	o__iii1-15	f__unidentified_iii1-15	g__unidentified_iii1-15	s__unidentified_iii1-15	New.CleanUp.ReferenceOTU197002
OTU43729	0	1	0	0	0	0	0	0	0	0	0	0	0	0	0	0	0	0	0	0	0	0	0	0	0	0	0	0	0	0	0	0	0	0	0	0	k__Bacteria	p__Acidobacteria	c__Acidobacteria-6	o__iii1-15	f__unidentified_iii1-15	g__unidentified_iii1-15	s__unidentified_iii1-15	New.CleanUp.ReferenceOTU197613
OTU43916	0	0	0	0	0	0	0	0	0	0	0	0	0	0	0	0	0	0	0	0	0	0	0	0	0	0	0	0	0	0	0	0	0	1	0	0	k__Bacteria	p__Acidobacteria	c__Acidobacteria-6	o__iii1-15	f__unidentified_iii1-15	g__unidentified_iii1-15	s__unidentified_iii1-15	New.CleanUp.ReferenceOTU198695
OTU44037	0	0	0	0	0	0	0	0	0	0	0	0	0	0	0	0	0	1	0	0	0	0	0	0	0	0	0	0	0	0	0	0	0	0	0	0	k__Bacteria	p__Acidobacteria	c__Acidobacteria-6	o__iii1-15	f__unidentified_iii1-15	g__unidentified_iii1-15	s__unidentified_iii1-15	New.CleanUp.ReferenceOTU199454
OTU44163	0	0	0	0	0	0	0	0	0	0	0	0	1	0	0	0	0	0	0	0	0	0	0	0	0	0	0	0	0	0	0	0	0	0	0	0	k__Bacteria	p__Acidobacteria	c__Acidobacteria-6	o__iii1-15	f__unidentified_iii1-15	g__unidentified_iii1-15	s__unidentified_iii1-15	New.CleanUp.ReferenceOTU200162
OTU44731	1	0	0	0	0	0	0	0	0	0	0	0	0	0	0	0	0	0	0	0	0	0	0	0	0	0	0	0	0	0	0	0	0	0	0	0	k__Bacteria	p__Acidobacteria	c__Acidobacteria-6	o__iii1-15	f__unidentified_iii1-15	g__unidentified_iii1-15	s__unidentified_iii1-15	New.CleanUp.ReferenceOTU203854
OTU44822	0	0	0	0	0	0	0	1	0	0	0	0	0	0	0	0	0	0	0	0	0	0	0	0	0	0	0	0	0	0	0	0	0	0	0	0	k__Bacteria	p__Acidobacteria	c__Acidobacteria-6	o__iii1-15	f__unidentified_iii1-15	g__unidentified_iii1-15	s__unidentified_iii1-15	New.CleanUp.ReferenceOTU204528
OTU45061	0	0	0	0	0	0	0	1	0	0	0	0	0	0	0	0	0	0	0	0	0	0	0	0	0	0	0	0	0	0	0	0	0	0	0	0	k__Bacteria	p__Acidobacteria	c__Acidobacteria-6	o__iii1-15	f__unidentified_iii1-15	g__unidentified_iii1-15	s__unidentified_iii1-15	New.CleanUp.ReferenceOTU206111
OTU45269	0	0	0	0	0	0	0	0	0	0	0	0	0	0	0	0	0	0	1	0	0	0	0	0	0	0	0	0	0	0	0	0	0	0	0	0	k__Bacteria	p__Acidobacteria	c__Acidobacteria-6	o__iii1-15	f__unidentified_iii1-15	g__unidentified_iii1-15	s__unidentified_iii1-15	New.CleanUp.ReferenceOTU207470
OTU45271	0	0	0	0	0	0	0	0	0	0	1	0	0	0	0	0	0	0	0	0	0	0	0	0	0	0	0	0	0	0	0	0	0	0	0	0	k__Bacteria	p__Acidobacteria	c__Acidobacteria-6	o__iii1-15	f__unidentified_iii1-15	g__unidentified_iii1-15	s__unidentified_iii1-15	New.CleanUp.ReferenceOTU207484
OTU45311	0	0	0	0	0	1	0	0	0	0	0	0	0	0	0	0	0	0	0	0	0	0	0	0	0	0	0	0	0	0	0	0	0	0	0	0	k__Bacteria	p__Acidobacteria	c__Acidobacteria-6	o__iii1-15	f__unidentified_iii1-15	g__unidentified_iii1-15	s__unidentified_iii1-15	New.CleanUp.ReferenceOTU207765
OTU46255	0	1	0	0	0	0	0	0	0	0	0	0	0	0	0	0	0	0	0	0	0	0	0	0	0	0	0	0	0	0	0	0	0	0	0	0	k__Bacteria	p__Acidobacteria	c__Acidobacteria-6	o__iii1-15	f__unidentified_iii1-15	g__unidentified_iii1-15	s__unidentified_iii1-15	New.CleanUp.ReferenceOTU213403
OTU46391	0	0	0	0	0	0	0	0	0	0	0	0	0	0	0	0	0	0	0	0	0	0	0	0	0	1	0	0	0	0	0	0	0	0	0	0	k__Bacteria	p__Acidobacteria	c__Acidobacteria-6	o__iii1-15	f__unidentified_iii1-15	g__unidentified_iii1-15	s__unidentified_iii1-15	New.CleanUp.ReferenceOTU214263
OTU46414	0	0	0	0	0	0	0	0	1	0	0	0	0	0	0	0	0	0	0	0	0	0	0	0	0	0	0	0	0	0	0	0	0	0	0	0	k__Bacteria	p__Acidobacteria	c__Acidobacteria-6	o__iii1-15	f__unidentified_iii1-15	g__unidentified_iii1-15	s__unidentified_iii1-15	New.CleanUp.ReferenceOTU214375
OTU46474	0	0	0	0	0	0	0	0	0	0	0	0	0	0	0	0	0	0	0	0	0	0	0	0	0	0	1	0	0	0	0	0	0	0	0	0	k__Bacteria	p__Acidobacteria	c__Acidobacteria-6	o__iii1-15	f__unidentified_iii1-15	g__unidentified_iii1-15	s__unidentified_iii1-15	New.CleanUp.ReferenceOTU214748
OTU46513	0	0	1	0	0	0	0	0	0	0	0	0	0	0	0	0	0	0	0	0	0	0	0	0	0	0	0	0	0	0	0	0	0	0	0	0	k__Bacteria	p__Acidobacteria	c__Acidobacteria-6	o__iii1-15	f__unidentified_iii1-15	g__unidentified_iii1-15	s__unidentified_iii1-15	New.CleanUp.ReferenceOTU214974
OTU46515	0	0	0	0	0	0	0	0	0	0	0	0	0	0	0	1	0	0	0	0	0	0	0	0	0	0	0	0	0	0	0	0	0	0	0	0	k__Bacteria	p__Acidobacteria	c__Acidobacteria-6	o__iii1-15	f__unidentified_iii1-15	g__unidentified_iii1-15	s__unidentified_iii1-15	New.CleanUp.ReferenceOTU215004
OTU46618	0	0	1	0	0	0	0	0	0	0	0	0	0	0	0	0	0	0	0	0	0	0	0	0	0	0	0	0	0	0	0	0	0	0	0	0	k__Bacteria	p__Acidobacteria	c__Acidobacteria-6	o__iii1-15	f__unidentified_iii1-15	g__unidentified_iii1-15	s__unidentified_iii1-15	New.CleanUp.ReferenceOTU215694
OTU46717	0	0	0	0	0	0	1	0	0	0	0	0	0	0	0	0	0	0	0	0	0	0	0	0	0	0	0	0	0	0	0	0	0	0	0	0	k__Bacteria	p__Acidobacteria	c__Acidobacteria-6	o__iii1-15	f__unidentified_iii1-15	g__unidentified_iii1-15	s__unidentified_iii1-15	New.CleanUp.ReferenceOTU216254
OTU46929	0	0	1	0	0	0	0	0	0	0	0	0	0	0	0	0	0	0	0	0	0	0	0	0	0	0	0	0	0	0	0	0	0	0	0	0	k__Bacteria	p__Acidobacteria	c__Acidobacteria-6	o__iii1-15	f__unidentified_iii1-15	g__unidentified_iii1-15	s__unidentified_iii1-15	New.CleanUp.ReferenceOTU217506
OTU47092	0	0	0	0	0	0	0	0	0	0	0	0	0	0	0	0	0	0	0	1	0	0	0	0	0	0	0	0	0	0	0	0	0	0	0	0	k__Bacteria	p__Acidobacteria	c__Acidobacteria-6	o__iii1-15	f__unidentified_iii1-15	g__unidentified_iii1-15	s__unidentified_iii1-15	New.CleanUp.ReferenceOTU218446
OTU47116	0	0	0	0	0	0	0	0	0	0	0	0	0	0	0	1	0	0	0	0	0	0	0	0	0	0	0	0	0	0	0	0	0	0	0	0	k__Bacteria	p__Acidobacteria	c__Acidobacteria-6	o__iii1-15	f__unidentified_iii1-15	g__unidentified_iii1-15	s__unidentified_iii1-15	New.CleanUp.ReferenceOTU218643
OTU47479	0	0	0	0	0	0	0	0	0	0	0	0	0	0	0	0	0	0	1	0	0	0	0	0	0	0	0	0	0	0	0	0	0	0	0	0	k__Bacteria	p__Acidobacteria	c__Acidobacteria-6	o__iii1-15	f__unidentified_iii1-15	g__unidentified_iii1-15	s__unidentified_iii1-15	New.CleanUp.ReferenceOTU220760
OTU47515	0	1	0	0	0	0	0	0	0	0	0	0	0	0	0	0	0	0	0	0	0	0	0	0	0	0	0	0	0	0	0	0	0	0	0	0	k__Bacteria	p__Acidobacteria	c__Acidobacteria-6	o__iii1-15	f__unidentified_iii1-15	g__unidentified_iii1-15	s__unidentified_iii1-15	New.CleanUp.ReferenceOTU220958
OTU47523	0	0	0	0	0	0	0	0	1	0	0	0	0	0	0	0	0	0	0	0	0	0	0	0	0	0	0	0	0	0	0	0	0	0	0	0	k__Bacteria	p__Acidobacteria	c__Acidobacteria-6	o__iii1-15	f__unidentified_iii1-15	g__unidentified_iii1-15	s__unidentified_iii1-15	New.CleanUp.ReferenceOTU221024
OTU47528	0	0	0	0	0	0	0	0	0	1	0	0	0	0	0	0	0	0	0	0	0	0	0	0	0	0	0	0	0	0	0	0	0	0	0	0	k__Bacteria	p__Acidobacteria	c__Acidobacteria-6	o__iii1-15	f__unidentified_iii1-15	g__unidentified_iii1-15	s__unidentified_iii1-15	New.CleanUp.ReferenceOTU221064
OTU47632	0	0	0	0	0	0	0	0	0	0	0	0	0	0	1	0	0	0	0	0	0	0	0	0	0	0	0	0	0	0	0	0	0	0	0	0	k__Bacteria	p__Acidobacteria	c__Acidobacteria-6	o__iii1-15	f__unidentified_iii1-15	g__unidentified_iii1-15	s__unidentified_iii1-15	New.CleanUp.ReferenceOTU221756
OTU47697	0	0	0	0	0	0	0	0	1	0	0	0	0	0	0	0	0	0	0	0	0	0	0	0	0	0	0	0	0	0	0	0	0	0	0	0	k__Bacteria	p__Acidobacteria	c__Acidobacteria-6	o__iii1-15	f__unidentified_iii1-15	g__unidentified_iii1-15	s__unidentified_iii1-15	New.CleanUp.ReferenceOTU222157
OTU48137	0	0	0	0	0	0	0	1	0	0	0	0	0	0	0	0	0	0	0	0	0	0	0	0	0	0	0	0	0	0	0	0	0	0	0	0	k__Bacteria	p__Acidobacteria	c__Acidobacteria-6	o__iii1-15	f__unidentified_iii1-15	g__unidentified_iii1-15	s__unidentified_iii1-15	New.CleanUp.ReferenceOTU225027
OTU48169	0	0	0	0	0	0	0	0	0	0	0	0	0	0	0	0	0	0	0	0	0	0	0	0	0	0	0	0	0	0	0	1	0	0	0	0	k__Bacteria	p__Acidobacteria	c__Acidobacteria-6	o__iii1-15	f__unidentified_iii1-15	g__unidentified_iii1-15	s__unidentified_iii1-15	New.CleanUp.ReferenceOTU225197
OTU48508	0	0	0	0	0	0	0	0	0	0	0	0	0	0	0	0	0	0	0	0	0	0	0	0	0	0	0	0	0	0	0	0	0	0	0	1	k__Bacteria	p__Acidobacteria	c__Acidobacteria-6	o__iii1-15	f__unidentified_iii1-15	g__unidentified_iii1-15	s__unidentified_iii1-15	New.CleanUp.ReferenceOTU227336
OTU48622	0	0	0	0	0	0	0	0	0	0	0	0	0	0	0	0	0	0	0	0	0	1	0	0	0	0	0	0	0	0	0	0	0	0	0	0	k__Bacteria	p__Acidobacteria	c__Acidobacteria-6	o__iii1-15	f__unidentified_iii1-15	g__unidentified_iii1-15	s__unidentified_iii1-15	New.CleanUp.ReferenceOTU227906
OTU48955	0	0	0	0	0	0	0	0	0	0	0	0	0	0	0	0	0	0	0	0	0	0	0	1	0	0	0	0	0	0	0	0	0	0	0	0	k__Bacteria	p__Acidobacteria	c__Acidobacteria-6	o__iii1-15	f__unidentified_iii1-15	g__unidentified_iii1-15	s__unidentified_iii1-15	New.CleanUp.ReferenceOTU229965
OTU49132	0	0	0	0	0	0	0	0	0	0	0	0	0	0	0	1	0	0	0	0	0	0	0	0	0	0	0	0	0	0	0	0	0	0	0	0	k__Bacteria	p__Acidobacteria	c__Acidobacteria-6	o__iii1-15	f__unidentified_iii1-15	g__unidentified_iii1-15	s__unidentified_iii1-15	New.CleanUp.ReferenceOTU231102
OTU49216	0	0	1	0	0	0	0	0	0	0	0	0	0	0	0	0	0	0	0	0	0	0	0	0	0	0	0	0	0	0	0	0	0	0	0	0	k__Bacteria	p__Acidobacteria	c__Acidobacteria-6	o__iii1-15	f__unidentified_iii1-15	g__unidentified_iii1-15	s__unidentified_iii1-15	New.CleanUp.ReferenceOTU231587
OTU49319	0	0	0	0	0	0	0	0	0	1	0	0	0	0	0	0	0	0	0	0	0	0	0	0	0	0	0	0	0	0	0	0	0	0	0	0	k__Bacteria	p__Acidobacteria	c__Acidobacteria-6	o__iii1-15	f__unidentified_iii1-15	g__unidentified_iii1-15	s__unidentified_iii1-15	New.CleanUp.ReferenceOTU232209
OTU49594	0	0	0	0	0	0	0	0	0	0	0	0	0	0	0	1	0	0	0	0	0	0	0	0	0	0	0	0	0	0	0	0	0	0	0	0	k__Bacteria	p__Acidobacteria	c__Acidobacteria-6	o__iii1-15	f__unidentified_iii1-15	g__unidentified_iii1-15	s__unidentified_iii1-15	New.CleanUp.ReferenceOTU233868
OTU49618	1	0	0	0	0	0	0	0	0	0	0	0	0	0	0	0	0	0	0	0	0	0	0	0	0	0	0	0	0	0	0	0	0	0	0	0	k__Bacteria	p__Acidobacteria	c__Acidobacteria-6	o__iii1-15	f__unidentified_iii1-15	g__unidentified_iii1-15	s__unidentified_iii1-15	New.CleanUp.ReferenceOTU234008
OTU49901	0	0	0	0	0	0	0	0	0	0	0	0	0	0	0	0	0	1	0	0	0	0	0	0	0	0	0	0	0	0	0	0	0	0	0	0	k__Bacteria	p__Acidobacteria	c__Acidobacteria-6	o__iii1-15	f__unidentified_iii1-15	g__unidentified_iii1-15	s__unidentified_iii1-15	New.CleanUp.ReferenceOTU235765
OTU50361	0	0	0	0	0	0	0	1	0	0	0	0	0	0	0	0	0	0	0	0	0	0	0	0	0	0	0	0	0	0	0	0	0	0	0	0	k__Bacteria	p__Acidobacteria	c__Acidobacteria-6	o__iii1-15	f__unidentified_iii1-15	g__unidentified_iii1-15	s__unidentified_iii1-15	New.CleanUp.ReferenceOTU238705
OTU50490	0	0	0	0	0	0	0	0	0	0	0	0	0	0	0	0	1	0	0	0	0	0	0	0	0	0	0	0	0	0	0	0	0	0	0	0	k__Bacteria	p__Acidobacteria	c__Acidobacteria-6	o__iii1-15	f__unidentified_iii1-15	g__unidentified_iii1-15	s__unidentified_iii1-15	New.CleanUp.ReferenceOTU239450
OTU50707	1	0	0	0	0	0	0	0	0	0	0	0	0	0	0	0	0	0	0	0	0	0	0	0	0	0	0	0	0	0	0	0	0	0	0	0	k__Bacteria	p__Acidobacteria	c__Acidobacteria-6	o__iii1-15	f__unidentified_iii1-15	g__unidentified_iii1-15	s__unidentified_iii1-15	New.CleanUp.ReferenceOTU240918
OTU50795	0	0	0	0	0	0	0	0	0	0	0	0	0	0	0	0	0	0	0	0	1	0	0	0	0	0	0	0	0	0	0	0	0	0	0	0	k__Bacteria	p__Acidobacteria	c__Acidobacteria-6	o__iii1-15	f__unidentified_iii1-15	g__unidentified_iii1-15	s__unidentified_iii1-15	New.CleanUp.ReferenceOTU241418
OTU50847	0	0	0	0	0	0	0	0	0	0	0	0	0	0	0	0	0	0	0	0	0	0	0	1	0	0	0	0	0	0	0	0	0	0	0	0	k__Bacteria	p__Acidobacteria	c__Acidobacteria-6	o__iii1-15	f__unidentified_iii1-15	g__unidentified_iii1-15	s__unidentified_iii1-15	New.CleanUp.ReferenceOTU241667
OTU50947	0	0	0	0	0	0	0	0	0	0	0	0	0	0	0	0	0	0	0	0	0	0	1	0	0	0	0	0	0	0	0	0	0	0	0	0	k__Bacteria	p__Acidobacteria	c__Acidobacteria-6	o__iii1-15	f__unidentified_iii1-15	g__unidentified_iii1-15	s__unidentified_iii1-15	New.CleanUp.ReferenceOTU242212
OTU50959	0	0	0	0	0	0	0	0	0	0	0	0	0	0	0	1	0	0	0	0	0	0	0	0	0	0	0	0	0	0	0	0	0	0	0	0	k__Bacteria	p__Acidobacteria	c__Acidobacteria-6	o__iii1-15	f__unidentified_iii1-15	g__unidentified_iii1-15	s__unidentified_iii1-15	New.CleanUp.ReferenceOTU242301
OTU51059	0	0	0	0	0	0	1	0	0	0	0	0	0	0	0	0	0	0	0	0	0	0	0	0	0	0	0	0	0	0	0	0	0	0	0	0	k__Bacteria	p__Acidobacteria	c__Acidobacteria-6	o__iii1-15	f__unidentified_iii1-15	g__unidentified_iii1-15	s__unidentified_iii1-15	New.CleanUp.ReferenceOTU242875
OTU51209	0	0	0	0	0	0	0	0	0	0	0	0	0	0	0	1	0	0	0	0	0	0	0	0	0	0	0	0	0	0	0	0	0	0	0	0	k__Bacteria	p__Acidobacteria	c__Acidobacteria-6	o__iii1-15	f__unidentified_iii1-15	g__unidentified_iii1-15	s__unidentified_iii1-15	New.CleanUp.ReferenceOTU243824
OTU51278	1	0	0	0	0	0	0	0	0	0	0	0	0	0	0	0	0	0	0	0	0	0	0	0	0	0	0	0	0	0	0	0	0	0	0	0	k__Bacteria	p__Acidobacteria	c__Acidobacteria-6	o__iii1-15	f__unidentified_iii1-15	g__unidentified_iii1-15	s__unidentified_iii1-15	New.CleanUp.ReferenceOTU244293
OTU51927	0	0	0	0	0	0	0	0	0	0	0	0	0	0	0	0	0	0	0	1	0	0	0	0	0	0	0	0	0	0	0	0	0	0	0	0	k__Bacteria	p__Acidobacteria	c__Acidobacteria-6	o__iii1-15	f__unidentified_iii1-15	g__unidentified_iii1-15	s__unidentified_iii1-15	New.CleanUp.ReferenceOTU248306
OTU52206	0	0	0	0	0	0	0	0	0	0	0	0	1	0	0	0	0	0	0	0	0	0	0	0	0	0	0	0	0	0	0	0	0	0	0	0	k__Bacteria	p__Acidobacteria	c__Acidobacteria-6	o__iii1-15	f__unidentified_iii1-15	g__unidentified_iii1-15	s__unidentified_iii1-15	New.CleanUp.ReferenceOTU250012
OTU52285	0	0	0	0	0	0	0	0	0	0	0	0	0	0	0	0	0	0	0	0	1	0	0	0	0	0	0	0	0	0	0	0	0	0	0	0	k__Bacteria	p__Acidobacteria	c__Acidobacteria-6	o__iii1-15	f__unidentified_iii1-15	g__unidentified_iii1-15	s__unidentified_iii1-15	New.CleanUp.ReferenceOTU250492
OTU52362	1	0	0	0	0	0	0	0	0	0	0	0	0	0	0	0	0	0	0	0	0	0	0	0	0	0	0	0	0	0	0	0	0	0	0	0	k__Bacteria	p__Acidobacteria	c__Acidobacteria-6	o__iii1-15	f__unidentified_iii1-15	g__unidentified_iii1-15	s__unidentified_iii1-15	New.CleanUp.ReferenceOTU250933
OTU52502	0	0	0	0	1	0	0	0	0	0	0	0	0	0	0	0	0	0	0	0	0	0	0	0	0	0	0	0	0	0	0	0	0	0	0	0	k__Bacteria	p__Acidobacteria	c__Acidobacteria-6	o__iii1-15	f__unidentified_iii1-15	g__unidentified_iii1-15	s__unidentified_iii1-15	New.CleanUp.ReferenceOTU251757
OTU52721	0	0	0	0	0	0	0	0	0	0	0	0	0	0	0	0	0	0	1	0	0	0	0	0	0	0	0	0	0	0	0	0	0	0	0	0	k__Bacteria	p__Acidobacteria	c__Acidobacteria-6	o__iii1-15	f__unidentified_iii1-15	g__unidentified_iii1-15	s__unidentified_iii1-15	New.CleanUp.ReferenceOTU253110
OTU52864	0	0	1	0	0	0	0	0	0	0	0	0	0	0	0	0	0	0	0	0	0	0	0	0	0	0	0	0	0	0	0	0	0	0	0	0	k__Bacteria	p__Acidobacteria	c__Acidobacteria-6	o__iii1-15	f__unidentified_iii1-15	g__unidentified_iii1-15	s__unidentified_iii1-15	New.CleanUp.ReferenceOTU254035
OTU52926	0	0	0	0	0	0	0	0	0	0	0	0	0	0	0	0	1	0	0	0	0	0	0	0	0	0	0	0	0	0	0	0	0	0	0	0	k__Bacteria	p__Acidobacteria	c__Acidobacteria-6	o__iii1-15	f__unidentified_iii1-15	g__unidentified_iii1-15	s__unidentified_iii1-15	New.CleanUp.ReferenceOTU254491
OTU53164	0	0	0	0	0	0	0	0	0	0	0	0	1	0	0	0	0	0	0	0	0	0	0	0	0	0	0	0	0	0	0	0	0	0	0	0	k__Bacteria	p__Acidobacteria	c__Acidobacteria-6	o__iii1-15	f__unidentified_iii1-15	g__unidentified_iii1-15	s__unidentified_iii1-15	New.CleanUp.ReferenceOTU255819
OTU53487	0	0	0	0	0	0	0	0	0	0	0	0	0	0	0	0	0	0	0	0	0	0	0	0	0	0	0	0	0	0	0	0	0	0	1	0	k__Bacteria	p__Acidobacteria	c__Acidobacteria-6	o__iii1-15	f__unidentified_iii1-15	g__unidentified_iii1-15	s__unidentified_iii1-15	New.CleanUp.ReferenceOTU257723
OTU53832	0	0	1	0	0	0	0	0	0	0	0	0	0	0	0	0	0	0	0	0	0	0	0	0	0	0	0	0	0	0	0	0	0	0	0	0	k__Bacteria	p__Acidobacteria	c__Acidobacteria-6	o__iii1-15	f__unidentified_iii1-15	g__unidentified_iii1-15	s__unidentified_iii1-15	New.CleanUp.ReferenceOTU260018
OTU53850	0	0	1	0	0	0	0	0	0	0	0	0	0	0	0	0	0	0	0	0	0	0	0	0	0	0	0	0	0	0	0	0	0	0	0	0	k__Bacteria	p__Acidobacteria	c__Acidobacteria-6	o__iii1-15	f__unidentified_iii1-15	g__unidentified_iii1-15	s__unidentified_iii1-15	New.CleanUp.ReferenceOTU260130
OTU54580	0	0	0	0	0	0	0	0	0	0	0	0	0	0	0	0	0	0	0	1	0	0	0	0	0	0	0	0	0	0	0	0	0	0	0	0	k__Bacteria	p__Acidobacteria	c__Acidobacteria-6	o__iii1-15	f__unidentified_iii1-15	g__unidentified_iii1-15	s__unidentified_iii1-15	New.CleanUp.ReferenceOTU264827
OTU54595	0	0	0	0	0	0	1	0	0	0	0	0	0	0	0	0	0	0	0	0	0	0	0	0	0	0	0	0	0	0	0	0	0	0	0	0	k__Bacteria	p__Acidobacteria	c__Acidobacteria-6	o__iii1-15	f__unidentified_iii1-15	g__unidentified_iii1-15	s__unidentified_iii1-15	New.CleanUp.ReferenceOTU264979
OTU54652	0	0	0	0	0	0	0	0	0	0	0	0	0	1	0	0	0	0	0	0	0	0	0	0	0	0	0	0	0	0	0	0	0	0	0	0	k__Bacteria	p__Acidobacteria	c__Acidobacteria-6	o__iii1-15	f__unidentified_iii1-15	g__unidentified_iii1-15	s__unidentified_iii1-15	New.CleanUp.ReferenceOTU265394
OTU54768	1	0	0	0	0	0	0	0	0	0	0	0	0	0	0	0	0	0	0	0	0	0	0	0	0	0	0	0	0	0	0	0	0	0	0	0	k__Bacteria	p__Acidobacteria	c__Acidobacteria-6	o__iii1-15	f__unidentified_iii1-15	g__unidentified_iii1-15	s__unidentified_iii1-15	New.CleanUp.ReferenceOTU266250
OTU55197	1	0	0	0	0	0	0	0	0	0	0	0	0	0	0	0	0	0	0	0	0	0	0	0	0	0	0	0	0	0	0	0	0	0	0	0	k__Bacteria	p__Acidobacteria	c__Acidobacteria-6	o__iii1-15	f__unidentified_iii1-15	g__unidentified_iii1-15	s__unidentified_iii1-15	New.CleanUp.ReferenceOTU268945
OTU55336	0	0	1	0	0	0	0	0	0	0	0	0	0	0	0	0	0	0	0	0	0	0	0	0	0	0	0	0	0	0	0	0	0	0	0	0	k__Bacteria	p__Acidobacteria	c__Acidobacteria-6	o__iii1-15	f__unidentified_iii1-15	g__unidentified_iii1-15	s__unidentified_iii1-15	New.CleanUp.ReferenceOTU269669
OTU55363	0	0	0	0	0	0	0	0	0	0	0	0	0	0	0	0	0	0	0	0	0	0	0	0	0	0	0	0	0	0	0	0	1	0	0	0	k__Bacteria	p__Acidobacteria	c__Acidobacteria-6	o__iii1-15	f__unidentified_iii1-15	g__unidentified_iii1-15	s__unidentified_iii1-15	New.CleanUp.ReferenceOTU269809
OTU55392	0	0	0	0	0	0	0	0	1	0	0	0	0	0	0	0	0	0	0	0	0	0	0	0	0	0	0	0	0	0	0	0	0	0	0	0	k__Bacteria	p__Acidobacteria	c__Acidobacteria-6	o__iii1-15	f__unidentified_iii1-15	g__unidentified_iii1-15	s__unidentified_iii1-15	New.CleanUp.ReferenceOTU270024
OTU55514	0	0	0	0	0	0	0	0	0	0	0	0	0	0	0	0	0	0	0	0	0	1	0	0	0	0	0	0	0	0	0	0	0	0	0	0	k__Bacteria	p__Acidobacteria	c__Acidobacteria-6	o__iii1-15	f__unidentified_iii1-15	g__unidentified_iii1-15	s__unidentified_iii1-15	New.CleanUp.ReferenceOTU270860
OTU55674	0	0	0	0	0	0	0	1	0	0	0	0	0	0	0	0	0	0	0	0	0	0	0	0	0	0	0	0	0	0	0	0	0	0	0	0	k__Bacteria	p__Acidobacteria	c__Acidobacteria-6	o__iii1-15	f__unidentified_iii1-15	g__unidentified_iii1-15	s__unidentified_iii1-15	New.CleanUp.ReferenceOTU271858
OTU55882	0	0	0	0	0	0	0	0	1	0	0	0	0	0	0	0	0	0	0	0	0	0	0	0	0	0	0	0	0	0	0	0	0	0	0	0	k__Bacteria	p__Acidobacteria	c__Acidobacteria-6	o__iii1-15	f__unidentified_iii1-15	g__unidentified_iii1-15	s__unidentified_iii1-15	New.CleanUp.ReferenceOTU273122
OTU55903	0	0	0	0	0	0	0	0	0	0	0	0	0	0	0	1	0	0	0	0	0	0	0	0	0	0	0	0	0	0	0	0	0	0	0	0	k__Bacteria	p__Acidobacteria	c__Acidobacteria-6	o__iii1-15	f__unidentified_iii1-15	g__unidentified_iii1-15	s__unidentified_iii1-15	New.CleanUp.ReferenceOTU273258
OTU56293	0	0	0	0	0	0	0	0	0	0	0	0	0	0	1	0	0	0	0	0	0	0	0	0	0	0	0	0	0	0	0	0	0	0	0	0	k__Bacteria	p__Acidobacteria	c__Acidobacteria-6	o__iii1-15	f__unidentified_iii1-15	g__unidentified_iii1-15	s__unidentified_iii1-15	New.CleanUp.ReferenceOTU275848
OTU56442	0	0	0	0	0	0	0	0	0	0	0	0	0	0	0	1	0	0	0	0	0	0	0	0	0	0	0	0	0	0	0	0	0	0	0	0	k__Bacteria	p__Acidobacteria	c__Acidobacteria-6	o__iii1-15	f__unidentified_iii1-15	g__unidentified_iii1-15	s__unidentified_iii1-15	New.CleanUp.ReferenceOTU276826
OTU56469	0	0	0	0	0	0	0	0	0	0	0	0	0	0	0	1	0	0	0	0	0	0	0	0	0	0	0	0	0	0	0	0	0	0	0	0	k__Bacteria	p__Acidobacteria	c__Acidobacteria-6	o__iii1-15	f__unidentified_iii1-15	g__unidentified_iii1-15	s__unidentified_iii1-15	New.CleanUp.ReferenceOTU277029
OTU56529	0	0	0	0	0	0	0	0	1	0	0	0	0	0	0	0	0	0	0	0	0	0	0	0	0	0	0	0	0	0	0	0	0	0	0	0	k__Bacteria	p__Acidobacteria	c__Acidobacteria-6	o__iii1-15	f__unidentified_iii1-15	g__unidentified_iii1-15	s__unidentified_iii1-15	New.CleanUp.ReferenceOTU277417
OTU56530	0	0	1	0	0	0	0	0	0	0	0	0	0	0	0	0	0	0	0	0	0	0	0	0	0	0	0	0	0	0	0	0	0	0	0	0	k__Bacteria	p__Acidobacteria	c__Acidobacteria-6	o__iii1-15	f__unidentified_iii1-15	g__unidentified_iii1-15	s__unidentified_iii1-15	New.CleanUp.ReferenceOTU277442
OTU56567	0	0	0	0	0	0	0	0	0	0	0	0	1	0	0	0	0	0	0	0	0	0	0	0	0	0	0	0	0	0	0	0	0	0	0	0	k__Bacteria	p__Acidobacteria	c__Acidobacteria-6	o__iii1-15	f__unidentified_iii1-15	g__unidentified_iii1-15	s__unidentified_iii1-15	New.CleanUp.ReferenceOTU277640
OTU56599	0	0	0	0	0	0	0	0	0	0	0	0	0	0	0	0	0	0	0	0	1	0	0	0	0	0	0	0	0	0	0	0	0	0	0	0	k__Bacteria	p__Acidobacteria	c__Acidobacteria-6	o__iii1-15	f__unidentified_iii1-15	g__unidentified_iii1-15	s__unidentified_iii1-15	New.CleanUp.ReferenceOTU277842
OTU56631	0	0	0	0	0	0	0	0	0	1	0	0	0	0	0	0	0	0	0	0	0	0	0	0	0	0	0	0	0	0	0	0	0	0	0	0	k__Bacteria	p__Acidobacteria	c__Acidobacteria-6	o__iii1-15	f__unidentified_iii1-15	g__unidentified_iii1-15	s__unidentified_iii1-15	New.CleanUp.ReferenceOTU278092
OTU56716	1	0	0	0	0	0	0	0	0	0	0	0	0	0	0	0	0	0	0	0	0	0	0	0	0	0	0	0	0	0	0	0	0	0	0	0	k__Bacteria	p__Acidobacteria	c__Acidobacteria-6	o__iii1-15	f__unidentified_iii1-15	g__unidentified_iii1-15	s__unidentified_iii1-15	New.CleanUp.ReferenceOTU278554
OTU56847	0	0	0	0	0	0	0	0	0	1	0	0	0	0	0	0	0	0	0	0	0	0	0	0	0	0	0	0	0	0	0	0	0	0	0	0	k__Bacteria	p__Acidobacteria	c__Acidobacteria-6	o__iii1-15	f__unidentified_iii1-15	g__unidentified_iii1-15	s__unidentified_iii1-15	New.CleanUp.ReferenceOTU279266
OTU57120	0	0	0	0	0	0	0	0	0	0	0	0	0	0	0	0	1	0	0	0	0	0	0	0	0	0	0	0	0	0	0	0	0	0	0	0	k__Bacteria	p__Acidobacteria	c__Acidobacteria-6	o__iii1-15	f__unidentified_iii1-15	g__unidentified_iii1-15	s__unidentified_iii1-15	New.CleanUp.ReferenceOTU280864
OTU57303	1	0	0	0	0	0	0	0	0	0	0	0	0	0	0	0	0	0	0	0	0	0	0	0	0	0	0	0	0	0	0	0	0	0	0	0	k__Bacteria	p__Acidobacteria	c__Acidobacteria-6	o__iii1-15	f__unidentified_iii1-15	g__unidentified_iii1-15	s__unidentified_iii1-15	New.CleanUp.ReferenceOTU281916
OTU57480	0	0	0	0	0	0	0	0	0	0	0	0	0	0	0	0	0	0	0	1	0	0	0	0	0	0	0	0	0	0	0	0	0	0	0	0	k__Bacteria	p__Acidobacteria	c__Acidobacteria-6	o__iii1-15	f__unidentified_iii1-15	g__unidentified_iii1-15	s__unidentified_iii1-15	New.CleanUp.ReferenceOTU282950
OTU57868	0	0	1	0	0	0	0	0	0	0	0	0	0	0	0	0	0	0	0	0	0	0	0	0	0	0	0	0	0	0	0	0	0	0	0	0	k__Bacteria	p__Acidobacteria	c__Acidobacteria-6	o__iii1-15	f__unidentified_iii1-15	g__unidentified_iii1-15	s__unidentified_iii1-15	New.CleanUp.ReferenceOTU285419
OTU58166	0	0	0	0	0	0	0	0	0	0	1	0	0	0	0	0	0	0	0	0	0	0	0	0	0	0	0	0	0	0	0	0	0	0	0	0	k__Bacteria	p__Acidobacteria	c__Acidobacteria-6	o__iii1-15	f__unidentified_iii1-15	g__unidentified_iii1-15	s__unidentified_iii1-15	New.CleanUp.ReferenceOTU287285
OTU58432	0	0	0	0	0	0	0	0	0	1	0	0	0	0	0	0	0	0	0	0	0	0	0	0	0	0	0	0	0	0	0	0	0	0	0	0	k__Bacteria	p__Acidobacteria	c__Acidobacteria-6	o__iii1-15	f__unidentified_iii1-15	g__unidentified_iii1-15	s__unidentified_iii1-15	New.CleanUp.ReferenceOTU288748
OTU58459	1	0	0	0	0	0	0	0	0	0	0	0	0	0	0	0	0	0	0	0	0	0	0	0	0	0	0	0	0	0	0	0	0	0	0	0	k__Bacteria	p__Acidobacteria	c__Acidobacteria-6	o__iii1-15	f__unidentified_iii1-15	g__unidentified_iii1-15	s__unidentified_iii1-15	New.CleanUp.ReferenceOTU288969
OTU58936	0	0	0	0	0	0	0	0	0	0	0	0	0	1	0	0	0	0	0	0	0	0	0	0	0	0	0	0	0	0	0	0	0	0	0	0	k__Bacteria	p__Acidobacteria	c__Acidobacteria-6	o__iii1-15	f__unidentified_iii1-15	g__unidentified_iii1-15	s__unidentified_iii1-15	New.CleanUp.ReferenceOTU292085
OTU59070	0	0	0	0	0	0	0	0	0	0	0	0	0	0	0	0	0	0	0	0	0	1	0	0	0	0	0	0	0	0	0	0	0	0	0	0	k__Bacteria	p__Acidobacteria	c__Acidobacteria-6	o__iii1-15	f__unidentified_iii1-15	g__unidentified_iii1-15	s__unidentified_iii1-15	New.CleanUp.ReferenceOTU292974
OTU59513	0	0	0	0	0	0	0	1	0	0	0	0	0	0	0	0	0	0	0	0	0	0	0	0	0	0	0	0	0	0	0	0	0	0	0	0	k__Bacteria	p__Acidobacteria	c__Acidobacteria-6	o__iii1-15	f__unidentified_iii1-15	g__unidentified_iii1-15	s__unidentified_iii1-15	New.CleanUp.ReferenceOTU295854
OTU59539	0	0	0	0	0	0	0	0	0	0	0	0	0	0	0	0	0	0	1	0	0	0	0	0	0	0	0	0	0	0	0	0	0	0	0	0	k__Bacteria	p__Acidobacteria	c__Acidobacteria-6	o__iii1-15	f__unidentified_iii1-15	g__unidentified_iii1-15	s__unidentified_iii1-15	New.CleanUp.ReferenceOTU296025
OTU59654	0	0	0	0	0	0	0	0	0	0	0	0	1	0	0	0	0	0	0	0	0	0	0	0	0	0	0	0	0	0	0	0	0	0	0	0	k__Bacteria	p__Acidobacteria	c__Acidobacteria-6	o__iii1-15	f__unidentified_iii1-15	g__unidentified_iii1-15	s__unidentified_iii1-15	New.CleanUp.ReferenceOTU296745
OTU60087	1	0	0	0	0	0	0	0	0	0	0	0	0	0	0	0	0	0	0	0	0	0	0	0	0	0	0	0	0	0	0	0	0	0	0	0	k__Bacteria	p__Acidobacteria	c__Acidobacteria-6	o__iii1-15	f__unidentified_iii1-15	g__unidentified_iii1-15	s__unidentified_iii1-15	New.CleanUp.ReferenceOTU299372
OTU60238	0	0	0	0	0	0	0	0	0	0	0	0	0	1	0	0	0	0	0	0	0	0	0	0	0	0	0	0	0	0	0	0	0	0	0	0	k__Bacteria	p__Acidobacteria	c__Acidobacteria-6	o__iii1-15	f__unidentified_iii1-15	g__unidentified_iii1-15	s__unidentified_iii1-15	New.CleanUp.ReferenceOTU300192
OTU60504	0	0	0	0	0	0	0	0	0	0	0	0	0	0	0	0	0	0	1	0	0	0	0	0	0	0	0	0	0	0	0	0	0	0	0	0	k__Bacteria	p__Acidobacteria	c__Acidobacteria-6	o__iii1-15	f__unidentified_iii1-15	g__unidentified_iii1-15	s__unidentified_iii1-15	New.CleanUp.ReferenceOTU301856
OTU60663	0	0	0	0	0	0	0	0	0	0	0	0	0	0	1	0	0	0	0	0	0	0	0	0	0	0	0	0	0	0	0	0	0	0	0	0	k__Bacteria	p__Acidobacteria	c__Acidobacteria-6	o__iii1-15	f__unidentified_iii1-15	g__unidentified_iii1-15	s__unidentified_iii1-15	New.CleanUp.ReferenceOTU302922
OTU60709	0	1	0	0	0	0	0	0	0	0	0	0	0	0	0	0	0	0	0	0	0	0	0	0	0	0	0	0	0	0	0	0	0	0	0	0	k__Bacteria	p__Acidobacteria	c__Acidobacteria-6	o__iii1-15	f__unidentified_iii1-15	g__unidentified_iii1-15	s__unidentified_iii1-15	New.CleanUp.ReferenceOTU303194
OTU60759	0	0	0	0	0	0	0	0	0	0	0	0	0	0	0	0	0	0	1	0	0	0	0	0	0	0	0	0	0	0	0	0	0	0	0	0	k__Bacteria	p__Acidobacteria	c__Acidobacteria-6	o__iii1-15	f__unidentified_iii1-15	g__unidentified_iii1-15	s__unidentified_iii1-15	New.CleanUp.ReferenceOTU303477
OTU60878	0	0	0	0	0	0	0	1	0	0	0	0	0	0	0	0	0	0	0	0	0	0	0	0	0	0	0	0	0	0	0	0	0	0	0	0	k__Bacteria	p__Acidobacteria	c__Acidobacteria-6	o__iii1-15	f__unidentified_iii1-15	g__unidentified_iii1-15	s__unidentified_iii1-15	New.CleanUp.ReferenceOTU304161
OTU61084	1	0	0	0	0	0	0	0	0	0	0	0	0	0	0	0	0	0	0	0	0	0	0	0	0	0	0	0	0	0	0	0	0	0	0	0	k__Bacteria	p__Acidobacteria	c__Acidobacteria-6	o__iii1-15	f__unidentified_iii1-15	g__unidentified_iii1-15	s__unidentified_iii1-15	New.CleanUp.ReferenceOTU305487
OTU61535	0	0	0	0	0	0	0	0	0	0	0	0	0	0	0	1	0	0	0	0	0	0	0	0	0	0	0	0	0	0	0	0	0	0	0	0	k__Bacteria	p__Acidobacteria	c__Acidobacteria-6	o__iii1-15	f__unidentified_iii1-15	g__unidentified_iii1-15	s__unidentified_iii1-15	New.CleanUp.ReferenceOTU308527
OTU61547	0	0	0	0	0	0	0	1	0	0	0	0	0	0	0	0	0	0	0	0	0	0	0	0	0	0	0	0	0	0	0	0	0	0	0	0	k__Bacteria	p__Acidobacteria	c__Acidobacteria-6	o__iii1-15	f__unidentified_iii1-15	g__unidentified_iii1-15	s__unidentified_iii1-15	New.CleanUp.ReferenceOTU308608
OTU61613	0	0	1	0	0	0	0	0	0	0	0	0	0	0	0	0	0	0	0	0	0	0	0	0	0	0	0	0	0	0	0	0	0	0	0	0	k__Bacteria	p__Acidobacteria	c__Acidobacteria-6	o__iii1-15	f__unidentified_iii1-15	g__unidentified_iii1-15	s__unidentified_iii1-15	New.CleanUp.ReferenceOTU309003
OTU61681	0	0	0	0	0	0	0	0	0	0	0	0	0	0	0	0	0	0	0	1	0	0	0	0	0	0	0	0	0	0	0	0	0	0	0	0	k__Bacteria	p__Acidobacteria	c__Acidobacteria-6	o__iii1-15	f__unidentified_iii1-15	g__unidentified_iii1-15	s__unidentified_iii1-15	New.CleanUp.ReferenceOTU309462
OTU62057	0	0	0	0	0	0	0	0	0	0	0	0	1	0	0	0	0	0	0	0	0	0	0	0	0	0	0	0	0	0	0	0	0	0	0	0	k__Bacteria	p__Acidobacteria	c__Acidobacteria-6	o__iii1-15	f__unidentified_iii1-15	g__unidentified_iii1-15	s__unidentified_iii1-15	New.CleanUp.ReferenceOTU311917
OTU62136	0	0	0	0	0	0	0	0	0	0	0	0	0	1	0	0	0	0	0	0	0	0	0	0	0	0	0	0	0	0	0	0	0	0	0	0	k__Bacteria	p__Acidobacteria	c__Acidobacteria-6	o__iii1-15	f__unidentified_iii1-15	g__unidentified_iii1-15	s__unidentified_iii1-15	New.CleanUp.ReferenceOTU312375
OTU62169	1	0	0	0	0	0	0	0	0	0	0	0	0	0	0	0	0	0	0	0	0	0	0	0	0	0	0	0	0	0	0	0	0	0	0	0	k__Bacteria	p__Acidobacteria	c__Acidobacteria-6	o__iii1-15	f__unidentified_iii1-15	g__unidentified_iii1-15	s__unidentified_iii1-15	New.CleanUp.ReferenceOTU312577
OTU62404	0	0	0	0	0	0	0	1	0	0	0	0	0	0	0	0	0	0	0	0	0	0	0	0	0	0	0	0	0	0	0	0	0	0	0	0	k__Bacteria	p__Acidobacteria	c__Acidobacteria-6	o__iii1-15	f__unidentified_iii1-15	g__unidentified_iii1-15	s__unidentified_iii1-15	New.CleanUp.ReferenceOTU314121
OTU62975	0	1	0	0	0	0	0	0	0	0	0	0	0	0	0	0	0	0	0	0	0	0	0	0	0	0	0	0	0	0	0	0	0	0	0	0	k__Bacteria	p__Acidobacteria	c__Acidobacteria-6	o__iii1-15	f__unidentified_iii1-15	g__unidentified_iii1-15	s__unidentified_iii1-15	New.CleanUp.ReferenceOTU317679
OTU63148	0	0	0	0	0	0	1	0	0	0	0	0	0	0	0	0	0	0	0	0	0	0	0	0	0	0	0	0	0	0	0	0	0	0	0	0	k__Bacteria	p__Acidobacteria	c__Acidobacteria-6	o__iii1-15	f__unidentified_iii1-15	g__unidentified_iii1-15	s__unidentified_iii1-15	New.CleanUp.ReferenceOTU318756
OTU63164	0	0	0	0	0	0	0	0	0	0	0	0	1	0	0	0	0	0	0	0	0	0	0	0	0	0	0	0	0	0	0	0	0	0	0	0	k__Bacteria	p__Acidobacteria	c__Acidobacteria-6	o__iii1-15	f__unidentified_iii1-15	g__unidentified_iii1-15	s__unidentified_iii1-15	New.CleanUp.ReferenceOTU318843
OTU63396	0	0	0	0	0	0	0	0	0	0	0	0	0	0	0	0	0	0	1	0	0	0	0	0	0	0	0	0	0	0	0	0	0	0	0	0	k__Bacteria	p__Acidobacteria	c__Acidobacteria-6	o__iii1-15	f__unidentified_iii1-15	g__unidentified_iii1-15	s__unidentified_iii1-15	New.CleanUp.ReferenceOTU320173
OTU63900	0	0	0	0	0	0	0	0	0	0	0	0	0	0	0	0	1	0	0	0	0	0	0	0	0	0	0	0	0	0	0	0	0	0	0	0	k__Bacteria	p__Acidobacteria	c__Acidobacteria-6	o__iii1-15	f__unidentified_iii1-15	g__unidentified_iii1-15	s__unidentified_iii1-15	New.CleanUp.ReferenceOTU323507
OTU63957	0	0	0	0	0	0	0	0	0	0	0	0	0	0	0	0	0	0	0	0	0	0	1	0	0	0	0	0	0	0	0	0	0	0	0	0	k__Bacteria	p__Acidobacteria	c__Acidobacteria-6	o__iii1-15	f__unidentified_iii1-15	g__unidentified_iii1-15	s__unidentified_iii1-15	New.CleanUp.ReferenceOTU323890
OTU64029	0	0	0	0	0	0	0	0	0	0	0	0	0	1	0	0	0	0	0	0	0	0	0	0	0	0	0	0	0	0	0	0	0	0	0	0	k__Bacteria	p__Acidobacteria	c__Acidobacteria-6	o__iii1-15	f__unidentified_iii1-15	g__unidentified_iii1-15	s__unidentified_iii1-15	New.CleanUp.ReferenceOTU324411
OTU64946	0	0	1	0	0	0	0	0	0	0	0	0	0	0	0	0	0	0	0	0	0	0	0	0	0	0	0	0	0	0	0	0	0	0	0	0	k__Bacteria	p__Acidobacteria	c__Acidobacteria-6	o__iii1-15	f__unidentified_iii1-15	g__unidentified_iii1-15	s__unidentified_iii1-15	New.CleanUp.ReferenceOTU330663
OTU65080	0	0	0	0	0	0	0	0	0	0	0	0	0	1	0	0	0	0	0	0	0	0	0	0	0	0	0	0	0	0	0	0	0	0	0	0	k__Bacteria	p__Acidobacteria	c__Acidobacteria-6	o__iii1-15	f__unidentified_iii1-15	g__unidentified_iii1-15	s__unidentified_iii1-15	New.CleanUp.ReferenceOTU331492
OTU65207	0	0	0	0	0	0	0	0	0	0	0	0	0	0	0	1	0	0	0	0	0	0	0	0	0	0	0	0	0	0	0	0	0	0	0	0	k__Bacteria	p__Acidobacteria	c__Acidobacteria-6	o__iii1-15	f__unidentified_iii1-15	g__unidentified_iii1-15	s__unidentified_iii1-15	New.CleanUp.ReferenceOTU332271
OTU65256	1	0	0	0	0	0	0	0	0	0	0	0	0	0	0	0	0	0	0	0	0	0	0	0	0	0	0	0	0	0	0	0	0	0	0	0	k__Bacteria	p__Acidobacteria	c__Acidobacteria-6	o__iii1-15	f__unidentified_iii1-15	g__unidentified_iii1-15	s__unidentified_iii1-15	New.CleanUp.ReferenceOTU332539
OTU65269	0	0	0	0	0	0	0	0	1	0	0	0	0	0	0	0	0	0	0	0	0	0	0	0	0	0	0	0	0	0	0	0	0	0	0	0	k__Bacteria	p__Acidobacteria	c__Acidobacteria-6	o__iii1-15	f__unidentified_iii1-15	g__unidentified_iii1-15	s__unidentified_iii1-15	New.CleanUp.ReferenceOTU332632
OTU65290	0	0	0	0	0	0	0	0	0	0	1	0	0	0	0	0	0	0	0	0	0	0	0	0	0	0	0	0	0	0	0	0	0	0	0	0	k__Bacteria	p__Acidobacteria	c__Acidobacteria-6	o__iii1-15	f__unidentified_iii1-15	g__unidentified_iii1-15	s__unidentified_iii1-15	New.CleanUp.ReferenceOTU332784
OTU65535	0	0	0	0	0	0	0	0	0	0	0	0	0	0	0	0	0	0	0	0	0	1	0	0	0	0	0	0	0	0	0	0	0	0	0	0	k__Bacteria	p__Acidobacteria	c__Acidobacteria-6	o__iii1-15	f__unidentified_iii1-15	g__unidentified_iii1-15	s__unidentified_iii1-15	New.CleanUp.ReferenceOTU334457
OTU65663	1	0	0	0	0	0	0	0	0	0	0	0	0	0	0	0	0	0	0	0	0	0	0	0	0	0	0	0	0	0	0	0	0	0	0	0	k__Bacteria	p__Acidobacteria	c__Acidobacteria-6	o__iii1-15	f__unidentified_iii1-15	g__unidentified_iii1-15	s__unidentified_iii1-15	New.CleanUp.ReferenceOTU335258
OTU65683	0	0	0	0	0	0	0	0	0	0	0	0	0	0	0	0	0	0	0	0	0	0	0	0	0	0	0	0	0	0	0	0	0	0	1	0	k__Bacteria	p__Acidobacteria	c__Acidobacteria-6	o__iii1-15	f__unidentified_iii1-15	g__unidentified_iii1-15	s__unidentified_iii1-15	New.CleanUp.ReferenceOTU335347
OTU65739	0	0	0	0	0	0	0	0	1	0	0	0	0	0	0	0	0	0	0	0	0	0	0	0	0	0	0	0	0	0	0	0	0	0	0	0	k__Bacteria	p__Acidobacteria	c__Acidobacteria-6	o__iii1-15	f__unidentified_iii1-15	g__unidentified_iii1-15	s__unidentified_iii1-15	New.CleanUp.ReferenceOTU335743
OTU66168	0	0	1	0	0	0	0	0	0	0	0	0	0	0	0	0	0	0	0	0	0	0	0	0	0	0	0	0	0	0	0	0	0	0	0	0	k__Bacteria	p__Acidobacteria	c__Acidobacteria-6	o__iii1-15	f__unidentified_iii1-15	g__unidentified_iii1-15	s__unidentified_iii1-15	New.CleanUp.ReferenceOTU338688
OTU66282	0	0	0	0	0	0	0	0	0	0	1	0	0	0	0	0	0	0	0	0	0	0	0	0	0	0	0	0	0	0	0	0	0	0	0	0	k__Bacteria	p__Acidobacteria	c__Acidobacteria-6	o__iii1-15	f__unidentified_iii1-15	g__unidentified_iii1-15	s__unidentified_iii1-15	New.CleanUp.ReferenceOTU339454
OTU66493	0	0	0	0	0	0	0	0	0	0	0	0	0	0	0	0	0	0	0	0	0	0	0	1	0	0	0	0	0	0	0	0	0	0	0	0	k__Bacteria	p__Acidobacteria	c__Acidobacteria-6	o__iii1-15	f__unidentified_iii1-15	g__unidentified_iii1-15	s__unidentified_iii1-15	New.CleanUp.ReferenceOTU340842
OTU66666	0	0	0	0	0	0	0	0	0	0	0	0	0	0	1	0	0	0	0	0	0	0	0	0	0	0	0	0	0	0	0	0	0	0	0	0	k__Bacteria	p__Acidobacteria	c__Acidobacteria-6	o__iii1-15	f__unidentified_iii1-15	g__unidentified_iii1-15	s__unidentified_iii1-15	New.CleanUp.ReferenceOTU342027
OTU66758	0	0	1	0	0	0	0	0	0	0	0	0	0	0	0	0	0	0	0	0	0	0	0	0	0	0	0	0	0	0	0	0	0	0	0	0	k__Bacteria	p__Acidobacteria	c__Acidobacteria-6	o__iii1-15	f__unidentified_iii1-15	g__unidentified_iii1-15	s__unidentified_iii1-15	New.CleanUp.ReferenceOTU342615
OTU66908	1	0	0	0	0	0	0	0	0	0	0	0	0	0	0	0	0	0	0	0	0	0	0	0	0	0	0	0	0	0	0	0	0	0	0	0	k__Bacteria	p__Acidobacteria	c__Acidobacteria-6	o__iii1-15	f__unidentified_iii1-15	g__unidentified_iii1-15	s__unidentified_iii1-15	New.CleanUp.ReferenceOTU343613
OTU66979	0	0	0	0	0	0	0	0	0	0	0	0	0	0	1	0	0	0	0	0	0	0	0	0	0	0	0	0	0	0	0	0	0	0	0	0	k__Bacteria	p__Acidobacteria	c__Acidobacteria-6	o__iii1-15	f__unidentified_iii1-15	g__unidentified_iii1-15	s__unidentified_iii1-15	New.CleanUp.ReferenceOTU344067
OTU67001	0	1	0	0	0	0	0	0	0	0	0	0	0	0	0	0	0	0	0	0	0	0	0	0	0	0	0	0	0	0	0	0	0	0	0	0	k__Bacteria	p__Acidobacteria	c__Acidobacteria-6	o__iii1-15	f__unidentified_iii1-15	g__unidentified_iii1-15	s__unidentified_iii1-15	New.CleanUp.ReferenceOTU344214
OTU67096	0	0	0	0	0	0	0	0	0	0	0	0	0	0	0	0	0	0	0	0	0	0	0	1	0	0	0	0	0	0	0	0	0	0	0	0	k__Bacteria	p__Acidobacteria	c__Acidobacteria-6	o__iii1-15	f__unidentified_iii1-15	g__unidentified_iii1-15	s__unidentified_iii1-15	New.CleanUp.ReferenceOTU344768
OTU67439	0	0	0	0	0	0	0	0	0	0	0	0	0	1	0	0	0	0	0	0	0	0	0	0	0	0	0	0	0	0	0	0	0	0	0	0	k__Bacteria	p__Acidobacteria	c__Acidobacteria-6	o__iii1-15	f__unidentified_iii1-15	g__unidentified_iii1-15	s__unidentified_iii1-15	New.CleanUp.ReferenceOTU346928
OTU67611	0	0	0	0	0	0	0	0	0	1	0	0	0	0	0	0	0	0	0	0	0	0	0	0	0	0	0	0	0	0	0	0	0	0	0	0	k__Bacteria	p__Acidobacteria	c__Acidobacteria-6	o__iii1-15	f__unidentified_iii1-15	g__unidentified_iii1-15	s__unidentified_iii1-15	New.CleanUp.ReferenceOTU348185
OTU67759	0	1	0	0	0	0	0	0	0	0	0	0	0	0	0	0	0	0	0	0	0	0	0	0	0	0	0	0	0	0	0	0	0	0	0	0	k__Bacteria	p__Acidobacteria	c__Acidobacteria-6	o__iii1-15	f__unidentified_iii1-15	g__unidentified_iii1-15	s__unidentified_iii1-15	New.CleanUp.ReferenceOTU349201
OTU6458	33	23	37	10	2	1	18	15	3	2	6	40	32	41	35	37	13	27	114	45	30	2	1	38	1	1	0	0	0	0	0	1	0	1	0	1	k__Bacteria	p__Acidobacteria	c__Acidobacteria-6	o__iii1-15	f__mb2424	g__unidentified_mb2424	s__unidentified_mb2424	809354
OTU5982	82	13	11	1	1	1	3	1	0	0	0	10	2	71	49	69	0	0	7	9	1	0	0	234	0	0	0	0	0	0	0	0	0	0	0	0	k__Bacteria	p__Acidobacteria	c__Acidobacteria-6	o__iii1-15	f__mb2424	g__unidentified_mb2424	s__unidentified_mb2424	810882
OTU11868	60	16	13	0	0	0	0	0	0	0	0	25	14	113	39	57	0	0	3	7	0	0	0	61	0	0	0	0	0	0	0	0	0	0	0	0	k__Bacteria	p__Acidobacteria	c__Acidobacteria-6	o__iii1-15	f__mb2424	g__unidentified_mb2424	s__unidentified_mb2424	New.ReferenceOTU897
OTU37952	11	11	36	9	0	0	2	0	1	0	0	64	30	15	29	6	4	0	75	39	26	3	0	22	0	0	0	0	0	0	0	0	0	0	0	0	k__Bacteria	p__Acidobacteria	c__Acidobacteria-6	o__iii1-15	f__mb2424	g__unidentified_mb2424	s__unidentified_mb2424	New.CleanUp.ReferenceOTU162737
OTU10307	24	3	10	0	0	0	0	0	0	0	0	20	0	32	58	31	0	0	1	4	0	0	0	121	0	0	0	0	0	0	0	0	0	0	0	0	k__Bacteria	p__Acidobacteria	c__Acidobacteria-6	o__iii1-15	f__mb2424	g__unidentified_mb2424	s__unidentified_mb2424	4478795
OTU7848	43	2	0	0	0	0	0	0	1	0	0	2	0	50	14	17	0	0	0	0	0	0	0	104	0	0	0	0	0	0	0	0	0	0	0	0	k__Bacteria	p__Acidobacteria	c__Acidobacteria-6	o__iii1-15	f__mb2424	g__unidentified_mb2424	s__unidentified_mb2424	884238
OTU5480	48	21	0	2	0	0	0	0	1	0	0	1	2	51	46	5	0	0	2	7	0	0	0	38	0	0	0	0	0	0	0	0	0	0	0	0	k__Bacteria	p__Acidobacteria	c__Acidobacteria-6	o__iii1-15	f__mb2424	g__unidentified_mb2424	s__unidentified_mb2424	2504865
OTU6858	49	6	1	0	0	0	0	0	0	0	0	3	0	9	17	71	0	0	1	0	0	0	0	63	0	0	0	0	0	0	0	0	0	0	0	0	k__Bacteria	p__Acidobacteria	c__Acidobacteria-6	o__iii1-15	f__mb2424	g__unidentified_mb2424	s__unidentified_mb2424	539570
OTU6888	3	3	6	2	0	0	0	0	1	0	3	15	18	4	18	7	2	0	34	15	11	1	1	4	0	0	0	0	0	0	0	0	0	0	0	0	k__Bacteria	p__Acidobacteria	c__Acidobacteria-6	o__iii1-15	f__mb2424	g__unidentified_mb2424	s__unidentified_mb2424	662514
OTU4345	14	3	1	0	0	0	0	0	0	0	0	0	4	44	9	15	0	0	0	0	0	0	0	28	0	0	0	0	0	0	0	0	0	0	0	0	k__Bacteria	p__Acidobacteria	c__Acidobacteria-6	o__iii1-15	f__mb2424	g__unidentified_mb2424	s__unidentified_mb2424	139322
OTU50281	3	5	4	8	0	0	0	0	0	0	0	3	13	5	6	3	1	0	28	7	18	0	0	0	0	0	0	0	0	0	0	0	0	0	0	0	k__Bacteria	p__Acidobacteria	c__Acidobacteria-6	o__iii1-15	f__mb2424	g__unidentified_mb2424	s__unidentified_mb2424	New.CleanUp.ReferenceOTU238211
OTU9577	9	0	6	1	0	0	1	0	0	0	0	5	6	14	9	32	0	0	0	1	0	0	0	14	0	1	0	0	0	0	0	0	0	0	0	0	k__Bacteria	p__Acidobacteria	c__Acidobacteria-6	o__iii1-15	f__mb2424	g__unidentified_mb2424	s__unidentified_mb2424	4456710
OTU4172	24	3	2	0	0	0	0	0	0	0	0	9	7	28	8	8	0	0	1	0	0	0	0	6	0	0	0	0	0	0	0	0	0	0	0	0	k__Bacteria	p__Acidobacteria	c__Acidobacteria-6	o__iii1-15	f__mb2424	g__unidentified_mb2424	s__unidentified_mb2424	112801
OTU516	9	0	0	0	0	0	0	0	0	0	0	0	3	7	12	0	0	0	0	0	0	0	0	58	0	0	0	0	0	0	0	0	0	0	0	0	k__Bacteria	p__Acidobacteria	c__Acidobacteria-6	o__iii1-15	f__mb2424	g__unidentified_mb2424	s__unidentified_mb2424	4378219
OTU6961	8	1	16	2	0	0	0	2	0	0	0	4	9	20	8	7	0	0	0	2	1	0	0	2	0	0	0	0	0	0	0	0	0	0	1	0	k__Bacteria	p__Acidobacteria	c__Acidobacteria-6	o__iii1-15	f__mb2424	g__unidentified_mb2424	s__unidentified_mb2424	4306288
OTU6481	3	0	0	0	0	0	0	0	0	0	0	3	1	2	0	47	0	0	0	0	0	0	0	10	0	0	0	0	0	0	0	0	0	0	0	0	k__Bacteria	p__Acidobacteria	c__Acidobacteria-6	o__iii1-15	f__mb2424	g__unidentified_mb2424	s__unidentified_mb2424	651779
OTU1598	4	0	0	0	0	0	0	0	0	0	0	0	0	5	2	6	0	0	0	0	0	0	0	38	0	0	0	0	0	0	0	0	0	0	0	0	k__Bacteria	p__Acidobacteria	c__Acidobacteria-6	o__iii1-15	f__mb2424	g__unidentified_mb2424	s__unidentified_mb2424	1808
OTU12370	0	0	0	0	0	0	0	0	0	0	0	0	0	1	0	21	0	0	0	0	0	0	0	28	0	0	0	0	0	0	0	0	0	0	0	0	k__Bacteria	p__Acidobacteria	c__Acidobacteria-6	o__iii1-15	f__mb2424	g__unidentified_mb2424	s__unidentified_mb2424	New.ReferenceOTU694
OTU1034	5	2	0	0	0	0	0	0	0	0	0	0	0	9	3	12	0	0	0	0	0	0	0	9	0	0	0	0	0	0	0	0	0	0	0	0	k__Bacteria	p__Acidobacteria	c__Acidobacteria-6	o__iii1-15	f__mb2424	g__unidentified_mb2424	s__unidentified_mb2424	4442093
OTU9381	7	7	8	1	0	0	0	0	0	0	0	1	1	7	2	1	0	0	2	1	0	0	0	0	0	0	0	0	0	0	0	0	0	0	0	0	k__Bacteria	p__Acidobacteria	c__Acidobacteria-6	o__iii1-15	f__mb2424	g__unidentified_mb2424	s__unidentified_mb2424	4390806
OTU11996	9	0	0	0	0	0	0	0	0	0	0	2	0	6	1	5	0	0	0	0	0	0	0	15	0	0	0	0	0	0	0	0	0	0	0	0	k__Bacteria	p__Acidobacteria	c__Acidobacteria-6	o__iii1-15	f__mb2424	g__unidentified_mb2424	s__unidentified_mb2424	New.ReferenceOTU526
OTU21860	5	0	0	0	0	0	0	0	0	0	0	0	0	4	6	1	0	0	0	0	0	0	0	21	0	0	0	0	0	0	0	0	0	0	0	0	k__Bacteria	p__Acidobacteria	c__Acidobacteria-6	o__iii1-15	f__mb2424	g__unidentified_mb2424	s__unidentified_mb2424	New.CleanUp.ReferenceOTU57706
OTU983	3	2	3	0	0	0	0	0	1	0	0	1	2	8	10	2	0	0	1	1	0	0	0	0	0	0	0	0	0	0	0	0	0	0	0	0	k__Bacteria	p__Acidobacteria	c__Acidobacteria-6	o__iii1-15	f__mb2424	g__unidentified_mb2424	s__unidentified_mb2424	612951
OTU9348	0	0	0	0	0	0	0	0	0	0	0	0	0	0	0	4	0	0	0	0	0	0	0	28	0	0	0	0	0	0	0	0	0	0	0	0	k__Bacteria	p__Acidobacteria	c__Acidobacteria-6	o__iii1-15	f__mb2424	g__unidentified_mb2424	s__unidentified_mb2424	3843947
OTU14197	8	1	3	1	0	0	2	0	0	0	0	1	1	1	6	0	0	0	1	1	0	0	0	3	0	0	0	0	0	0	0	0	0	0	0	0	k__Bacteria	p__Acidobacteria	c__Acidobacteria-6	o__iii1-15	f__mb2424	g__unidentified_mb2424	s__unidentified_mb2424	New.CleanUp.ReferenceOTU10957
OTU9148	6	1	4	1	0	0	2	1	0	0	0	1	1	1	0	1	0	1	1	1	2	2	0	0	0	0	0	0	0	0	0	0	0	0	0	0	k__Bacteria	p__Acidobacteria	c__Acidobacteria-6	o__iii1-15	f__mb2424	g__unidentified_mb2424	s__unidentified_mb2424	2651002
OTU77	0	0	0	0	0	0	0	0	0	0	0	0	0	0	0	20	0	0	0	0	0	0	0	1	0	0	0	0	0	0	0	0	0	0	0	0	k__Bacteria	p__Acidobacteria	c__Acidobacteria-6	o__iii1-15	f__mb2424	g__unidentified_mb2424	s__unidentified_mb2424	4293581
OTU5825	2	1	5	0	0	0	0	0	0	0	0	0	0	1	0	0	0	0	0	0	0	0	0	7	0	0	0	0	0	0	0	1	0	0	0	0	k__Bacteria	p__Acidobacteria	c__Acidobacteria-6	o__iii1-15	f__mb2424	g__unidentified_mb2424	s__unidentified_mb2424	4349553
OTU52813	2	13	1	0	0	0	0	0	0	0	0	1	0	0	0	0	0	0	0	0	0	0	0	0	0	0	0	0	0	0	0	0	0	0	0	0	k__Bacteria	p__Acidobacteria	c__Acidobacteria-6	o__iii1-15	f__mb2424	g__unidentified_mb2424	s__unidentified_mb2424	New.CleanUp.ReferenceOTU253649
OTU42677	5	0	0	0	0	0	0	0	0	0	0	0	0	2	1	3	0	0	0	0	0	0	0	5	0	0	0	0	0	0	0	0	0	0	0	0	k__Bacteria	p__Acidobacteria	c__Acidobacteria-6	o__iii1-15	f__mb2424	g__unidentified_mb2424	s__unidentified_mb2424	New.CleanUp.ReferenceOTU191771
OTU800	3	1	3	0	0	0	0	0	0	0	0	0	0	0	3	5	0	0	0	0	0	0	0	0	0	0	0	0	0	0	0	0	0	0	0	0	k__Bacteria	p__Acidobacteria	c__Acidobacteria-6	o__iii1-15	f__mb2424	g__unidentified_mb2424	s__unidentified_mb2424	4377639
OTU47593	2	0	0	0	0	0	0	0	0	0	0	0	0	2	3	3	0	0	0	0	0	0	0	5	0	0	0	0	0	0	0	0	0	0	0	0	k__Bacteria	p__Acidobacteria	c__Acidobacteria-6	o__iii1-15	f__mb2424	g__unidentified_mb2424	s__unidentified_mb2424	New.CleanUp.ReferenceOTU221516
OTU66640	0	0	0	0	0	0	0	0	0	0	0	0	0	0	0	14	0	0	0	0	0	0	0	1	0	0	0	0	0	0	0	0	0	0	0	0	k__Bacteria	p__Acidobacteria	c__Acidobacteria-6	o__iii1-15	f__mb2424	g__unidentified_mb2424	s__unidentified_mb2424	New.CleanUp.ReferenceOTU341852
OTU1419	0	0	0	0	0	0	0	0	0	0	0	0	0	0	0	11	0	0	0	0	0	0	0	3	0	0	0	0	0	0	0	0	0	0	0	0	k__Bacteria	p__Acidobacteria	c__Acidobacteria-6	o__iii1-15	f__mb2424	g__unidentified_mb2424	s__unidentified_mb2424	620407
OTU11301	0	0	0	0	0	0	0	0	0	0	0	1	0	1	0	9	0	0	0	0	0	0	0	1	0	0	0	0	0	0	0	0	0	0	0	0	k__Bacteria	p__Acidobacteria	c__Acidobacteria-6	o__iii1-15	f__mb2424	g__unidentified_mb2424	s__unidentified_mb2424	4387726
OTU45829	0	0	0	0	0	0	0	0	1	0	0	0	0	0	0	5	0	0	0	0	0	0	0	6	0	0	0	0	0	0	0	0	0	0	0	0	k__Bacteria	p__Acidobacteria	c__Acidobacteria-6	o__iii1-15	f__mb2424	g__unidentified_mb2424	s__unidentified_mb2424	New.CleanUp.ReferenceOTU210747
OTU4624	0	0	0	0	0	0	0	0	0	0	0	0	0	0	0	10	0	0	0	0	0	0	0	1	0	0	0	0	0	0	0	0	0	0	0	0	k__Bacteria	p__Acidobacteria	c__Acidobacteria-6	o__iii1-15	f__mb2424	g__unidentified_mb2424	s__unidentified_mb2424	607579
OTU65135	0	0	0	0	0	0	0	0	0	0	0	0	0	0	0	4	0	0	0	0	0	0	0	6	0	0	0	0	0	0	0	0	0	0	0	0	k__Bacteria	p__Acidobacteria	c__Acidobacteria-6	o__iii1-15	f__mb2424	g__unidentified_mb2424	s__unidentified_mb2424	New.CleanUp.ReferenceOTU331851
OTU32472	5	0	0	0	0	0	0	0	0	0	0	0	0	3	1	0	0	0	0	0	0	0	0	0	0	0	0	0	0	0	0	0	0	0	0	0	k__Bacteria	p__Acidobacteria	c__Acidobacteria-6	o__iii1-15	f__mb2424	g__unidentified_mb2424	s__unidentified_mb2424	New.CleanUp.ReferenceOTU126523
OTU46869	0	0	0	0	0	0	0	0	0	0	0	0	0	0	0	9	0	0	0	0	0	0	0	0	0	0	0	0	0	0	0	0	0	0	0	0	k__Bacteria	p__Acidobacteria	c__Acidobacteria-6	o__iii1-15	f__mb2424	g__unidentified_mb2424	s__unidentified_mb2424	New.CleanUp.ReferenceOTU217156
OTU53570	1	0	0	0	0	0	0	0	0	0	0	0	0	0	1	3	0	0	2	0	0	0	0	0	0	0	0	0	0	0	0	0	1	0	0	1	k__Bacteria	p__Acidobacteria	c__Acidobacteria-6	o__iii1-15	f__mb2424	g__unidentified_mb2424	s__unidentified_mb2424	New.CleanUp.ReferenceOTU258279
OTU13719	3	0	0	0	0	0	0	0	0	0	0	0	0	2	1	0	0	0	0	0	0	0	0	2	0	0	0	0	0	0	0	0	0	0	0	0	k__Bacteria	p__Acidobacteria	c__Acidobacteria-6	o__iii1-15	f__mb2424	g__unidentified_mb2424	s__unidentified_mb2424	New.CleanUp.ReferenceOTU8032
OTU4010	1	0	0	0	0	0	0	0	0	0	0	1	0	4	0	0	0	0	0	0	0	0	0	0	0	0	0	0	0	0	0	0	0	0	0	0	k__Bacteria	p__Acidobacteria	c__Acidobacteria-6	o__iii1-15	f__mb2424	g__unidentified_mb2424	s__unidentified_mb2424	724471
OTU12351	1	0	0	0	0	0	0	0	0	0	0	0	0	0	0	2	0	0	0	0	0	0	0	3	0	0	0	0	0	0	0	0	0	0	0	0	k__Bacteria	p__Acidobacteria	c__Acidobacteria-6	o__iii1-15	f__mb2424	g__unidentified_mb2424	s__unidentified_mb2424	New.ReferenceOTU15
OTU35284	0	0	0	0	0	0	0	0	0	0	0	0	0	0	0	3	0	0	0	0	0	0	0	3	0	0	0	0	0	0	0	0	0	0	0	0	k__Bacteria	p__Acidobacteria	c__Acidobacteria-6	o__iii1-15	f__mb2424	g__unidentified_mb2424	s__unidentified_mb2424	New.CleanUp.ReferenceOTU144862
OTU49073	2	1	0	0	0	0	0	0	0	0	0	0	0	1	0	0	0	0	0	0	0	0	0	2	0	0	0	0	0	0	0	0	0	0	0	0	k__Bacteria	p__Acidobacteria	c__Acidobacteria-6	o__iii1-15	f__mb2424	g__unidentified_mb2424	s__unidentified_mb2424	New.CleanUp.ReferenceOTU230726
OTU63811	1	1	0	0	0	0	0	0	0	0	0	0	0	3	1	0	0	0	0	0	0	0	0	0	0	0	0	0	0	0	0	0	0	0	0	0	k__Bacteria	p__Acidobacteria	c__Acidobacteria-6	o__iii1-15	f__mb2424	g__unidentified_mb2424	s__unidentified_mb2424	New.CleanUp.ReferenceOTU322886
OTU13088	0	0	0	0	0	0	0	0	0	0	0	0	0	0	0	5	0	0	0	0	0	0	0	0	0	0	0	0	0	0	0	0	0	0	0	0	k__Bacteria	p__Acidobacteria	c__Acidobacteria-6	o__iii1-15	f__mb2424	g__unidentified_mb2424	s__unidentified_mb2424	New.CleanUp.ReferenceOTU4030
OTU52477	0	0	0	0	0	0	0	0	0	0	0	0	0	2	0	2	0	0	0	0	0	0	0	1	0	0	0	0	0	0	0	0	0	0	0	0	k__Bacteria	p__Acidobacteria	c__Acidobacteria-6	o__iii1-15	f__mb2424	g__unidentified_mb2424	s__unidentified_mb2424	New.CleanUp.ReferenceOTU251600
OTU9107	1	0	0	0	0	0	0	0	0	0	0	0	0	1	0	2	0	0	0	0	0	0	0	0	0	0	0	0	0	0	0	0	0	0	0	0	k__Bacteria	p__Acidobacteria	c__Acidobacteria-6	o__iii1-15	f__mb2424	g__unidentified_mb2424	s__unidentified_mb2424	805941
OTU61752	0	0	0	0	0	0	0	0	0	0	0	0	0	1	2	0	0	0	0	0	0	0	0	1	0	0	0	0	0	0	0	0	0	0	0	0	k__Bacteria	p__Acidobacteria	c__Acidobacteria-6	o__iii1-15	f__mb2424	g__unidentified_mb2424	s__unidentified_mb2424	New.CleanUp.ReferenceOTU309905
OTU3582	2	0	1	0	0	0	0	0	0	0	0	0	0	0	0	0	0	0	0	0	0	0	0	0	0	0	0	0	0	0	0	0	0	0	0	0	k__Bacteria	p__Acidobacteria	c__Acidobacteria-6	o__iii1-15	f__mb2424	g__unidentified_mb2424	s__unidentified_mb2424	4349101
OTU16668	1	0	0	0	0	0	0	0	0	0	0	0	0	1	0	0	0	0	0	0	0	0	0	1	0	0	0	0	0	0	0	0	0	0	0	0	k__Bacteria	p__Acidobacteria	c__Acidobacteria-6	o__iii1-15	f__mb2424	g__unidentified_mb2424	s__unidentified_mb2424	New.CleanUp.ReferenceOTU25760
OTU18872	0	0	1	0	0	0	1	0	0	0	0	0	1	0	0	0	0	0	0	0	0	0	0	0	0	0	0	0	0	0	0	0	0	0	0	0	k__Bacteria	p__Acidobacteria	c__Acidobacteria-6	o__iii1-15	f__mb2424	g__unidentified_mb2424	s__unidentified_mb2424	New.CleanUp.ReferenceOTU39369
OTU21813	0	0	1	0	0	0	0	0	0	0	0	1	0	0	0	0	0	0	1	0	0	0	0	0	0	0	0	0	0	0	0	0	0	0	0	0	k__Bacteria	p__Acidobacteria	c__Acidobacteria-6	o__iii1-15	f__mb2424	g__unidentified_mb2424	s__unidentified_mb2424	New.CleanUp.ReferenceOTU57433
OTU51354	0	0	0	0	0	0	0	0	0	0	0	0	0	0	0	3	0	0	0	0	0	0	0	0	0	0	0	0	0	0	0	0	0	0	0	0	k__Bacteria	p__Acidobacteria	c__Acidobacteria-6	o__iii1-15	f__mb2424	g__unidentified_mb2424	s__unidentified_mb2424	New.CleanUp.ReferenceOTU244695
OTU18086	0	0	0	0	0	0	0	0	0	0	0	0	0	0	2	0	0	0	0	0	0	0	0	0	0	0	0	0	0	0	0	0	0	0	0	0	k__Bacteria	p__Acidobacteria	c__Acidobacteria-6	o__iii1-15	f__mb2424	g__unidentified_mb2424	s__unidentified_mb2424	New.CleanUp.ReferenceOTU34504
OTU29711	0	0	0	0	0	0	1	0	0	0	0	0	0	0	0	0	0	0	0	0	0	0	1	0	0	0	0	0	0	0	0	0	0	0	0	0	k__Bacteria	p__Acidobacteria	c__Acidobacteria-6	o__iii1-15	f__mb2424	g__unidentified_mb2424	s__unidentified_mb2424	New.CleanUp.ReferenceOTU108719
OTU31462	0	0	0	0	0	0	0	0	0	0	0	0	0	0	0	0	0	0	0	0	0	0	0	2	0	0	0	0	0	0	0	0	0	0	0	0	k__Bacteria	p__Acidobacteria	c__Acidobacteria-6	o__iii1-15	f__mb2424	g__unidentified_mb2424	s__unidentified_mb2424	New.CleanUp.ReferenceOTU119796
OTU35472	1	0	0	0	0	0	0	0	0	0	0	0	0	0	1	0	0	0	0	0	0	0	0	0	0	0	0	0	0	0	0	0	0	0	0	0	k__Bacteria	p__Acidobacteria	c__Acidobacteria-6	o__iii1-15	f__mb2424	g__unidentified_mb2424	s__unidentified_mb2424	New.CleanUp.ReferenceOTU146263
OTU39400	0	2	0	0	0	0	0	0	0	0	0	0	0	0	0	0	0	0	0	0	0	0	0	0	0	0	0	0	0	0	0	0	0	0	0	0	k__Bacteria	p__Acidobacteria	c__Acidobacteria-6	o__iii1-15	f__mb2424	g__unidentified_mb2424	s__unidentified_mb2424	New.CleanUp.ReferenceOTU172374
OTU47453	0	0	0	0	0	0	0	0	0	0	0	0	0	0	0	2	0	0	0	0	0	0	0	0	0	0	0	0	0	0	0	0	0	0	0	0	k__Bacteria	p__Acidobacteria	c__Acidobacteria-6	o__iii1-15	f__mb2424	g__unidentified_mb2424	s__unidentified_mb2424	New.CleanUp.ReferenceOTU220584
OTU49476	0	0	1	0	0	0	0	0	0	0	0	0	0	0	0	0	0	0	0	0	0	0	0	1	0	0	0	0	0	0	0	0	0	0	0	0	k__Bacteria	p__Acidobacteria	c__Acidobacteria-6	o__iii1-15	f__mb2424	g__unidentified_mb2424	s__unidentified_mb2424	New.CleanUp.ReferenceOTU233150
OTU54394	0	0	1	0	0	0	0	0	0	0	0	0	0	0	0	0	0	0	0	0	0	0	0	1	0	0	0	0	0	0	0	0	0	0	0	0	k__Bacteria	p__Acidobacteria	c__Acidobacteria-6	o__iii1-15	f__mb2424	g__unidentified_mb2424	s__unidentified_mb2424	New.CleanUp.ReferenceOTU263694
OTU57404	0	0	0	0	0	0	0	0	0	0	0	0	0	0	0	0	0	0	0	2	0	0	0	0	0	0	0	0	0	0	0	0	0	0	0	0	k__Bacteria	p__Acidobacteria	c__Acidobacteria-6	o__iii1-15	f__mb2424	g__unidentified_mb2424	s__unidentified_mb2424	New.CleanUp.ReferenceOTU282519
OTU59871	0	0	0	0	0	0	0	0	1	0	0	0	0	0	0	0	0	0	0	0	1	0	0	0	0	0	0	0	0	0	0	0	0	0	0	0	k__Bacteria	p__Acidobacteria	c__Acidobacteria-6	o__iii1-15	f__mb2424	g__unidentified_mb2424	s__unidentified_mb2424	New.CleanUp.ReferenceOTU298061
OTU1603	0	0	0	0	0	0	0	0	0	0	0	0	0	0	0	1	0	0	0	0	0	0	0	0	0	0	0	0	0	0	0	0	0	0	0	0	k__Bacteria	p__Acidobacteria	c__Acidobacteria-6	o__iii1-15	f__mb2424	g__unidentified_mb2424	s__unidentified_mb2424	4419154
OTU3857	1	0	0	0	0	0	0	0	0	0	0	0	0	0	0	0	0	0	0	0	0	0	0	0	0	0	0	0	0	0	0	0	0	0	0	0	k__Bacteria	p__Acidobacteria	c__Acidobacteria-6	o__iii1-15	f__mb2424	g__unidentified_mb2424	s__unidentified_mb2424	1753826
OTU13776	0	0	0	0	0	0	0	0	0	0	0	0	0	0	0	0	0	0	0	0	0	0	0	1	0	0	0	0	0	0	0	0	0	0	0	0	k__Bacteria	p__Acidobacteria	c__Acidobacteria-6	o__iii1-15	f__mb2424	g__unidentified_mb2424	s__unidentified_mb2424	New.CleanUp.ReferenceOTU8319
OTU14181	0	0	0	0	0	0	0	0	0	0	0	0	0	0	0	0	0	0	0	0	0	0	0	1	0	0	0	0	0	0	0	0	0	0	0	0	k__Bacteria	p__Acidobacteria	c__Acidobacteria-6	o__iii1-15	f__mb2424	g__unidentified_mb2424	s__unidentified_mb2424	New.CleanUp.ReferenceOTU10836
OTU21301	0	0	0	0	0	0	0	0	0	0	0	0	0	0	0	0	0	0	0	0	0	0	0	1	0	0	0	0	0	0	0	0	0	0	0	0	k__Bacteria	p__Acidobacteria	c__Acidobacteria-6	o__iii1-15	f__mb2424	g__unidentified_mb2424	s__unidentified_mb2424	New.CleanUp.ReferenceOTU54278
OTU22978	0	0	0	0	0	0	0	0	0	0	0	0	0	0	0	1	0	0	0	0	0	0	0	0	0	0	0	0	0	0	0	0	0	0	0	0	k__Bacteria	p__Acidobacteria	c__Acidobacteria-6	o__iii1-15	f__mb2424	g__unidentified_mb2424	s__unidentified_mb2424	New.CleanUp.ReferenceOTU64926
OTU24810	0	0	0	0	0	0	0	0	0	0	0	0	0	1	0	0	0	0	0	0	0	0	0	0	0	0	0	0	0	0	0	0	0	0	0	0	k__Bacteria	p__Acidobacteria	c__Acidobacteria-6	o__iii1-15	f__mb2424	g__unidentified_mb2424	s__unidentified_mb2424	New.CleanUp.ReferenceOTU76485
OTU26861	0	0	0	0	0	0	0	0	0	0	0	0	0	0	0	0	0	0	0	0	0	0	0	1	0	0	0	0	0	0	0	0	0	0	0	0	k__Bacteria	p__Acidobacteria	c__Acidobacteria-6	o__iii1-15	f__mb2424	g__unidentified_mb2424	s__unidentified_mb2424	New.CleanUp.ReferenceOTU89887
OTU27662	0	0	0	0	0	0	0	0	0	0	0	0	0	0	0	0	0	0	0	0	0	0	0	1	0	0	0	0	0	0	0	0	0	0	0	0	k__Bacteria	p__Acidobacteria	c__Acidobacteria-6	o__iii1-15	f__mb2424	g__unidentified_mb2424	s__unidentified_mb2424	New.CleanUp.ReferenceOTU95282
OTU27814	0	0	0	0	0	0	0	0	0	0	0	0	0	0	0	0	0	0	0	0	0	0	0	1	0	0	0	0	0	0	0	0	0	0	0	0	k__Bacteria	p__Acidobacteria	c__Acidobacteria-6	o__iii1-15	f__mb2424	g__unidentified_mb2424	s__unidentified_mb2424	New.CleanUp.ReferenceOTU96307
OTU30563	0	0	0	0	0	0	0	0	0	0	0	0	0	0	0	0	0	0	0	0	0	0	0	1	0	0	0	0	0	0	0	0	0	0	0	0	k__Bacteria	p__Acidobacteria	c__Acidobacteria-6	o__iii1-15	f__mb2424	g__unidentified_mb2424	s__unidentified_mb2424	New.CleanUp.ReferenceOTU114156
OTU30938	0	0	0	0	0	0	0	0	0	0	0	0	0	0	0	0	0	0	0	0	0	0	0	1	0	0	0	0	0	0	0	0	0	0	0	0	k__Bacteria	p__Acidobacteria	c__Acidobacteria-6	o__iii1-15	f__mb2424	g__unidentified_mb2424	s__unidentified_mb2424	New.CleanUp.ReferenceOTU116326
OTU34666	1	0	0	0	0	0	0	0	0	0	0	0	0	0	0	0	0	0	0	0	0	0	0	0	0	0	0	0	0	0	0	0	0	0	0	0	k__Bacteria	p__Acidobacteria	c__Acidobacteria-6	o__iii1-15	f__mb2424	g__unidentified_mb2424	s__unidentified_mb2424	New.CleanUp.ReferenceOTU141002
OTU37644	0	0	0	0	0	0	0	0	0	0	0	0	0	0	1	0	0	0	0	0	0	0	0	0	0	0	0	0	0	0	0	0	0	0	0	0	k__Bacteria	p__Acidobacteria	c__Acidobacteria-6	o__iii1-15	f__mb2424	g__unidentified_mb2424	s__unidentified_mb2424	New.CleanUp.ReferenceOTU160874
OTU40071	0	0	0	0	0	0	0	0	0	0	0	0	0	0	0	1	0	0	0	0	0	0	0	0	0	0	0	0	0	0	0	0	0	0	0	0	k__Bacteria	p__Acidobacteria	c__Acidobacteria-6	o__iii1-15	f__mb2424	g__unidentified_mb2424	s__unidentified_mb2424	New.CleanUp.ReferenceOTU176362
OTU42568	0	0	0	0	0	0	0	0	0	0	0	0	0	0	1	0	0	0	0	0	0	0	0	0	0	0	0	0	0	0	0	0	0	0	0	0	k__Bacteria	p__Acidobacteria	c__Acidobacteria-6	o__iii1-15	f__mb2424	g__unidentified_mb2424	s__unidentified_mb2424	New.CleanUp.ReferenceOTU191116
OTU43472	0	0	0	0	0	0	0	0	0	0	0	0	0	0	1	0	0	0	0	0	0	0	0	0	0	0	0	0	0	0	0	0	0	0	0	0	k__Bacteria	p__Acidobacteria	c__Acidobacteria-6	o__iii1-15	f__mb2424	g__unidentified_mb2424	s__unidentified_mb2424	New.CleanUp.ReferenceOTU196128
OTU43678	0	0	0	0	0	0	0	0	0	0	0	0	0	0	0	1	0	0	0	0	0	0	0	0	0	0	0	0	0	0	0	0	0	0	0	0	k__Bacteria	p__Acidobacteria	c__Acidobacteria-6	o__iii1-15	f__mb2424	g__unidentified_mb2424	s__unidentified_mb2424	New.CleanUp.ReferenceOTU197309
OTU44886	0	0	0	0	0	0	0	0	0	0	0	0	0	0	0	1	0	0	0	0	0	0	0	0	0	0	0	0	0	0	0	0	0	0	0	0	k__Bacteria	p__Acidobacteria	c__Acidobacteria-6	o__iii1-15	f__mb2424	g__unidentified_mb2424	s__unidentified_mb2424	New.CleanUp.ReferenceOTU204932
OTU45041	0	0	0	0	0	0	0	0	0	0	0	0	0	0	0	0	0	0	0	0	0	0	0	1	0	0	0	0	0	0	0	0	0	0	0	0	k__Bacteria	p__Acidobacteria	c__Acidobacteria-6	o__iii1-15	f__mb2424	g__unidentified_mb2424	s__unidentified_mb2424	New.CleanUp.ReferenceOTU205971
OTU45670	0	0	0	0	0	0	0	1	0	0	0	0	0	0	0	0	0	0	0	0	0	0	0	0	0	0	0	0	0	0	0	0	0	0	0	0	k__Bacteria	p__Acidobacteria	c__Acidobacteria-6	o__iii1-15	f__mb2424	g__unidentified_mb2424	s__unidentified_mb2424	New.CleanUp.ReferenceOTU209900
OTU53100	0	0	1	0	0	0	0	0	0	0	0	0	0	0	0	0	0	0	0	0	0	0	0	0	0	0	0	0	0	0	0	0	0	0	0	0	k__Bacteria	p__Acidobacteria	c__Acidobacteria-6	o__iii1-15	f__mb2424	g__unidentified_mb2424	s__unidentified_mb2424	New.CleanUp.ReferenceOTU255486
OTU57143	1	0	0	0	0	0	0	0	0	0	0	0	0	0	0	0	0	0	0	0	0	0	0	0	0	0	0	0	0	0	0	0	0	0	0	0	k__Bacteria	p__Acidobacteria	c__Acidobacteria-6	o__iii1-15	f__mb2424	g__unidentified_mb2424	s__unidentified_mb2424	New.CleanUp.ReferenceOTU280987
OTU64754	0	0	0	0	0	0	0	0	0	0	0	0	0	0	1	0	0	0	0	0	0	0	0	0	0	0	0	0	0	0	0	0	0	0	0	0	k__Bacteria	p__Acidobacteria	c__Acidobacteria-6	o__iii1-15	f__mb2424	g__unidentified_mb2424	s__unidentified_mb2424	New.CleanUp.ReferenceOTU329522
OTU7315	141	57	210	110	3	2	27	106	100	63	19	46	141	139	79	117	212	20	274	119	151	37	42	196	0	1	0	0	0	0	0	0	5	4	0	9	k__Bacteria	p__Acidobacteria	c__Acidobacteria-6	o__iii1-15	f__RB40	g__unidentified_RB40	s__unidentified_RB40	4368625
OTU5451	18	31	104	33	4	1	17	60	39	28	20	88	102	64	57	14	59	7	219	113	112	62	57	7	0	0	0	0	0	0	0	0	24	18	3	20	k__Bacteria	p__Acidobacteria	c__Acidobacteria-6	o__iii1-15	f__RB40	g__unidentified_RB40	s__unidentified_RB40	4429453
OTU1779	38	25	66	21	0	0	4	42	2	5	0	37	86	106	71	26	17	1	285	82	146	45	1	32	0	1	0	0	0	0	0	0	0	0	0	0	k__Bacteria	p__Acidobacteria	c__Acidobacteria-6	o__iii1-15	f__RB40	g__unidentified_RB40	s__unidentified_RB40	3053116
OTU3551	35	20	53	17	6	14	18	33	22	11	10	13	50	32	33	26	37	7	78	55	125	41	19	51	0	1	0	0	0	2	0	0	3	9	6	4	k__Bacteria	p__Acidobacteria	c__Acidobacteria-6	o__iii1-15	f__RB40	g__unidentified_RB40	s__unidentified_RB40	4467260
OTU2426	65	67	53	10	0	3	3	30	10	10	9	23	29	77	35	22	59	3	114	28	50	32	29	10	0	0	0	0	0	0	0	0	19	0	0	2	k__Bacteria	p__Acidobacteria	c__Acidobacteria-6	o__iii1-15	f__RB40	g__unidentified_RB40	s__unidentified_RB40	4481156
OTU486	36	19	8	3	0	0	0	1	9	9	3	7	30	37	27	25	2	0	171	70	182	20	11	43	0	0	0	0	0	0	0	0	0	0	0	0	k__Bacteria	p__Acidobacteria	c__Acidobacteria-6	o__iii1-15	f__RB40	g__unidentified_RB40	s__unidentified_RB40	1902952
OTU2407	5	6	53	13	7	4	17	42	41	21	22	29	39	0	7	3	49	22	66	47	55	39	32	2	0	3	0	0	0	0	0	0	21	0	12	1	k__Bacteria	p__Acidobacteria	c__Acidobacteria-6	o__iii1-15	f__RB40	g__unidentified_RB40	s__unidentified_RB40	4369843
OTU4367	74	37	17	1	0	0	0	0	1	0	0	24	25	107	44	29	0	0	139	33	40	2	0	13	0	0	0	0	0	0	0	0	0	0	0	0	k__Bacteria	p__Acidobacteria	c__Acidobacteria-6	o__iii1-15	f__RB40	g__unidentified_RB40	s__unidentified_RB40	4440765
OTU7544	69	20	26	0	0	0	0	1	1	0	0	7	11	89	51	75	0	0	12	5	0	0	0	38	0	0	0	0	0	0	0	0	0	0	0	0	k__Bacteria	p__Acidobacteria	c__Acidobacteria-6	o__iii1-15	f__RB40	g__unidentified_RB40	s__unidentified_RB40	2195184
OTU12382	9	8	40	14	3	0	11	33	17	2	4	11	24	19	17	1	12	5	40	30	30	17	14	1	0	1	0	0	0	0	0	0	7	3	0	7	k__Bacteria	p__Acidobacteria	c__Acidobacteria-6	o__iii1-15	f__RB40	g__unidentified_RB40	s__unidentified_RB40	New.ReferenceOTU188
OTU11572	18	13	53	24	0	0	5	32	9	1	0	9	27	12	10	3	10	1	99	32	13	6	0	0	0	1	0	0	0	0	0	0	0	0	0	0	k__Bacteria	p__Acidobacteria	c__Acidobacteria-6	o__iii1-15	f__RB40	g__unidentified_RB40	s__unidentified_RB40	New.ReferenceOTU732
OTU4769	23	24	53	7	0	0	13	5	2	0	0	31	16	45	38	12	4	1	42	21	9	5	0	12	0	0	0	0	0	0	0	0	0	0	0	1	k__Bacteria	p__Acidobacteria	c__Acidobacteria-6	o__iii1-15	f__RB40	g__unidentified_RB40	s__unidentified_RB40	671757
OTU967	0	5	49	1	0	16	1	35	24	10	3	0	25	0	0	0	67	18	7	6	0	0	1	0	0	0	0	0	0	0	0	0	35	1	10	28	k__Bacteria	p__Acidobacteria	c__Acidobacteria-6	o__iii1-15	f__RB40	g__unidentified_RB40	s__unidentified_RB40	4351273
OTU9222	9	3	14	6	0	2	9	14	7	3	3	24	13	17	17	14	13	7	33	13	47	10	6	4	0	1	0	0	0	1	0	0	6	2	3	5	k__Bacteria	p__Acidobacteria	c__Acidobacteria-6	o__iii1-15	f__RB40	g__unidentified_RB40	s__unidentified_RB40	858813
OTU7842	4	3	22	3	3	0	7	21	28	1	0	28	22	4	7	3	10	0	55	28	24	6	12	8	0	0	0	0	0	0	0	0	0	0	1	1	k__Bacteria	p__Acidobacteria	c__Acidobacteria-6	o__iii1-15	f__RB40	g__unidentified_RB40	s__unidentified_RB40	4372503
OTU2597	14	8	26	4	0	0	2	24	3	3	0	2	12	24	9	18	9	0	52	23	21	2	2	34	0	0	0	0	0	0	0	0	2	1	0	1	k__Bacteria	p__Acidobacteria	c__Acidobacteria-6	o__iii1-15	f__RB40	g__unidentified_RB40	s__unidentified_RB40	772651
OTU53858	1	0	4	4	1	0	6	18	20	21	29	10	14	0	0	0	27	4	22	8	8	34	44	0	0	0	0	0	0	0	0	0	7	3	3	3	k__Bacteria	p__Acidobacteria	c__Acidobacteria-6	o__iii1-15	f__RB40	g__unidentified_RB40	s__unidentified_RB40	New.CleanUp.ReferenceOTU260164
OTU11785	36	36	21	0	0	0	1	0	0	0	0	19	7	83	26	6	0	0	19	7	0	0	0	7	0	0	0	0	0	0	0	0	0	0	0	0	k__Bacteria	p__Acidobacteria	c__Acidobacteria-6	o__iii1-15	f__RB40	g__unidentified_RB40	s__unidentified_RB40	New.ReferenceOTU177
OTU11425	21	8	4	4	0	1	4	6	19	3	3	24	10	24	5	18	3	0	15	12	13	6	2	23	0	0	0	0	0	0	0	0	4	0	0	0	k__Bacteria	p__Acidobacteria	c__Acidobacteria-6	o__iii1-15	f__RB40	g__unidentified_RB40	s__unidentified_RB40	113782
OTU492	14	14	15	4	0	0	6	7	9	3	2	22	14	19	8	3	10	0	22	7	6	2	10	10	0	0	0	0	0	0	0	0	0	0	1	1	k__Bacteria	p__Acidobacteria	c__Acidobacteria-6	o__iii1-15	f__RB40	g__unidentified_RB40	s__unidentified_RB40	2127554
OTU5662	4	2	3	2	2	2	3	7	3	1	2	2	22	3	5	0	30	7	40	13	8	3	11	0	0	0	0	0	0	0	0	0	1	0	0	1	k__Bacteria	p__Acidobacteria	c__Acidobacteria-6	o__iii1-15	f__RB40	g__unidentified_RB40	s__unidentified_RB40	3755711
OTU4679	3	6	14	3	10	1	7	6	8	5	3	3	6	4	4	0	8	7	11	9	10	7	4	0	0	1	0	0	0	0	0	1	0	8	4	6	k__Bacteria	p__Acidobacteria	c__Acidobacteria-6	o__iii1-15	f__RB40	g__unidentified_RB40	s__unidentified_RB40	666413
OTU4708	43	5	0	0	0	0	0	0	0	0	0	0	0	31	8	49	0	0	0	0	0	0	0	21	0	0	0	0	0	0	0	0	0	0	0	0	k__Bacteria	p__Acidobacteria	c__Acidobacteria-6	o__iii1-15	f__RB40	g__unidentified_RB40	s__unidentified_RB40	2733658
OTU9368	22	3	1	0	0	1	3	0	0	0	0	5	1	15	7	27	0	0	2	2	0	0	0	47	1	0	6	0	0	8	0	5	0	0	1	0	k__Bacteria	p__Acidobacteria	c__Acidobacteria-6	o__iii1-15	f__RB40	g__unidentified_RB40	s__unidentified_RB40	4428771
OTU59441	8	0	1	0	0	0	0	0	0	0	0	0	3	5	7	36	0	1	0	0	0	0	0	85	0	0	0	0	0	0	0	0	0	0	0	0	k__Bacteria	p__Acidobacteria	c__Acidobacteria-6	o__iii1-15	f__RB40	g__unidentified_RB40	s__unidentified_RB40	New.CleanUp.ReferenceOTU295323
OTU7980	0	2	2	4	0	39	17	1	0	0	0	0	0	0	0	0	2	27	0	3	0	0	0	0	0	2	3	0	7	9	1	8	1	5	2	5	k__Bacteria	p__Acidobacteria	c__Acidobacteria-6	o__iii1-15	f__RB40	g__unidentified_RB40	s__unidentified_RB40	151454
OTU692	11	0	0	0	0	0	0	0	0	0	0	0	0	59	14	31	0	0	0	0	0	0	0	10	0	0	0	0	0	0	0	0	0	0	0	0	k__Bacteria	p__Acidobacteria	c__Acidobacteria-6	o__iii1-15	f__RB40	g__unidentified_RB40	s__unidentified_RB40	3300262
OTU39947	14	8	7	0	1	0	0	0	0	0	0	15	9	24	28	5	0	0	4	8	2	0	0	0	0	0	0	0	0	0	0	0	0	0	0	0	k__Bacteria	p__Acidobacteria	c__Acidobacteria-6	o__iii1-15	f__RB40	g__unidentified_RB40	s__unidentified_RB40	New.CleanUp.ReferenceOTU175745
OTU7237	36	4	1	1	0	0	2	0	0	0	0	6	2	19	10	16	0	0	1	2	0	0	0	9	0	0	0	0	0	0	0	0	0	0	0	0	k__Bacteria	p__Acidobacteria	c__Acidobacteria-6	o__iii1-15	f__RB40	g__unidentified_RB40	s__unidentified_RB40	4340699
OTU60366	0	0	0	0	0	0	0	0	0	0	0	0	0	0	3	0	2	2	0	0	0	0	0	0	0	0	0	0	0	0	0	0	48	11	0	25	k__Bacteria	p__Acidobacteria	c__Acidobacteria-6	o__iii1-15	f__RB40	g__unidentified_RB40	s__unidentified_RB40	New.CleanUp.ReferenceOTU301013
OTU11496	1	2	4	1	5	1	4	1	0	0	0	2	2	0	2	0	1	3	2	6	0	1	0	2	1	2	2	0	0	0	0	2	2	1	12	4	k__Bacteria	p__Acidobacteria	c__Acidobacteria-6	o__iii1-15	f__RB40	g__unidentified_RB40	s__unidentified_RB40	750490
OTU41881	0	0	2	1	0	2	2	1	9	1	8	0	6	0	0	0	14	5	3	3	0	1	5	0	0	0	0	0	0	0	0	0	0	0	0	2	k__Bacteria	p__Acidobacteria	c__Acidobacteria-6	o__iii1-15	f__RB40	g__unidentified_RB40	s__unidentified_RB40	New.CleanUp.ReferenceOTU187016
OTU25992	6	8	8	2	0	0	1	0	0	0	0	10	7	2	6	0	0	0	3	2	8	0	0	0	0	0	0	0	0	0	0	0	0	0	0	0	k__Bacteria	p__Acidobacteria	c__Acidobacteria-6	o__iii1-15	f__RB40	g__unidentified_RB40	s__unidentified_RB40	New.CleanUp.ReferenceOTU84246
OTU11854	0	0	0	0	0	0	0	0	0	0	0	0	0	0	0	0	2	0	0	0	0	0	0	0	0	0	0	0	0	0	0	0	32	7	1	15	k__Bacteria	p__Acidobacteria	c__Acidobacteria-6	o__iii1-15	f__RB40	g__unidentified_RB40	s__unidentified_RB40	New.ReferenceOTU418
[truncated: 35,184 more rows]
