# Supplementary material
Source: MDPI journal article supplement (https://www.mdpi.com/1999-4907/11/11/1153)
Supplement: s1 [file s1 › Table S4.xlsx]

## Sheet: Supplementary Table S4
Electronic Supplementary Material
Article title: Linking Tree Health, Rhizosphere Physicochemical Properties, and Microbiome in Acute Oak Decline
Journal name: Forests
Diogo Pinho1,2, Cristina Barroso1,3, Hugo Froufe1, Nathan Brown4, Elena Vanguelova4, Conceição Egas1,3, Sandra Denman4
1 Next Generation Sequencing Unit, UC-Biotech, Biocant Park, Núcleo 04 Lote 8, 3060-197 Cantanhede, Portugal
2 Department of Biology and CESAM, University of Aveiro, Campus Santiago, 3810-193 Aveiro, Portugal
3 Center for Neuroscience and Cell Biology, University of Coimbra, Rua Larga Faculdade de Medicina, Pólo I, 1st floor, 3004-504 Coimbra, Portugal
4 Forest Research, Centre for Ecology, Biosecurity and Society, Farnham, Surrey GU10 4LH, UK
Author for correspondence: Sandra Denman. Tel: +44 (0)300 067 5640. Email: sandra.denman@forestry.gsi.gov.uk
Supplementary Table S4 Fungal OTU table

## Sheet: Table S4
OTU_ID	1H-E	2H-E	4H-E	5H-E	1AOD-E	2AOD-E	3AOD-E	4AOD-E	1B-E	2B-E	4B-E	5B-E	1H-H	3H-H	4H-H	5H-H	1AOD-H	2AOD-H	3AOD-H	5AOD-H	1B-H	2B-H	3B-H	4B-H	1H-R	2H-R	4H-R	5H-R	1AOD-R	2AOD-R	3AOD-R	5AOD-R	2B-R	3B-R	4B-R	5B-R	Kingdom	Phylum	Class	Order	Family	Genus	Species	OTU_ID
OTU7008	728	417	523	745	51	192	485	460	886	440	391	2059	2531	362	874	660	600	758	689	339	833	1834	2672	379	5	261	7	2	36	120	52	295	1118	1702	1271	672	k__Fungi	p__unidentified_Fungi	c__unidentified_Fungi	o__unidentified_Fungi	f__unidentified_Fungi	g___unidentified_Fungi	s___unidentified_Fungi	New.ReferenceOTU425
OTU6974	1	609	6	2206	0	1418	620	718	1	1	0	1	0	1	0	0	2719	794	4	0	0	2	0	0	0	0	0	0	0	0	0	0	17	0	0	1	k__Fungi	p__unidentified_Fungi	c__unidentified_Fungi	o__unidentified_Fungi	f__unidentified_Fungi	g___unidentified_Fungi	s___unidentified_Fungi	SH007867.07FU_FR852111_reps
OTU6861	0	0	4	0	0	8	0	0	0	0	0	0	0	0	0	0	0	26	0	0	0	0	0	0	7	37	86	1125	210	32	407	320	0	0	0	0	k__Fungi	p__unidentified_Fungi	c__unidentified_Fungi	o__unidentified_Fungi	f__unidentified_Fungi	g___unidentified_Fungi	s___unidentified_Fungi	SH008901.07FU_HQ211894_reps
OTU6778	3	2	20	1	0	1	0	7	3	0	3	4	129	4	41	19	29	224	33	19	52	277	238	0	0	1	0	0	0	2	0	0	24	2	48	12	k__Fungi	p__unidentified_Fungi	c__unidentified_Fungi	o__unidentified_Fungi	f__unidentified_Fungi	g___unidentified_Fungi	s___unidentified_Fungi	New.ReferenceOTU93
OTU6746	0	0	0	3	0	4	9	0	6	1	257	149	0	0	0	0	5	7	0	0	0	1	0	0	0	0	0	0	0	0	0	0	2	9	150	490	k__Fungi	p__unidentified_Fungi	c__unidentified_Fungi	o__unidentified_Fungi	f__unidentified_Fungi	g___unidentified_Fungi	s___unidentified_Fungi	SH008904.07FU_EF040832_reps
OTU6755	15	10	62	5	0	2	7	5	20	24	1	3	76	60	10	5	6	8	5	6	11	36	463	22	0	0	0	10	1	6	3	2	1	3	91	15	k__Fungi	p__unidentified_Fungi	c__unidentified_Fungi	o__unidentified_Fungi	f__unidentified_Fungi	g___unidentified_Fungi	s___unidentified_Fungi	SH006606.07FU_GQ292750_refs
OTU6753	12	3	7	13	0	87	6	13	0	27	17	15	0	10	55	19	9	0	12	5	7	20	3	0	1	1	0	12	6	8	57	33	259	31	50	186	k__Fungi	p__unidentified_Fungi	c__unidentified_Fungi	o__unidentified_Fungi	f__unidentified_Fungi	g___unidentified_Fungi	s___unidentified_Fungi	SH016424.07FU_JF740263_refs
OTU6713	0	0	0	0	0	0	0	0	0	0	0	0	0	0	0	0	0	0	0	0	0	0	0	0	1	27	382	11	43	60	98	96	0	0	0	0	k__Fungi	p__unidentified_Fungi	c__unidentified_Fungi	o__unidentified_Fungi	f__unidentified_Fungi	g___unidentified_Fungi	s___unidentified_Fungi	New.ReferenceOTU921
OTU6656	22	5	29	15	0	6	22	22	0	4	9	62	36	8	15	6	1	1	7	6	12	16	23	0	0	36	1	24	4	11	65	84	18	8	18	24	k__Fungi	p__unidentified_Fungi	c__unidentified_Fungi	o__unidentified_Fungi	f__unidentified_Fungi	g___unidentified_Fungi	s___unidentified_Fungi	SH008402.07FU_EU326196_reps
OTU6629	0	0	391	3	0	0	0	0	0	0	0	0	0	161	35	19	0	0	0	0	0	0	0	0	0	0	0	0	0	0	0	0	0	0	0	0	k__Fungi	p__unidentified_Fungi	c__unidentified_Fungi	o__unidentified_Fungi	f__unidentified_Fungi	g___unidentified_Fungi	s___unidentified_Fungi	SH028658.07FU_AB979728_reps_singleton
OTU6672	10	7	2	3	2	1	48	23	1	0	2	0	60	7	6	5	14	8	35	3	0	1	4	1	9	0	2	0	216	16	4	0	0	0	0	0	k__Fungi	p__unidentified_Fungi	c__unidentified_Fungi	o__unidentified_Fungi	f__unidentified_Fungi	g___unidentified_Fungi	s___unidentified_Fungi	New.ReferenceOTU562
OTU6327	0	0	1	0	1	0	0	2	0	1	2	0	23	0	0	0	0	0	0	0	0	0	0	0	0	18	30	0	6	4	85	83	0	0	0	0	k__Fungi	p__unidentified_Fungi	c__unidentified_Fungi	o__unidentified_Fungi	f__unidentified_Fungi	g___unidentified_Fungi	s___unidentified_Fungi	New.ReferenceOTU201
OTU6701	12	0	1	0	0	0	8	7	2	11	0	21	0	0	3	12	0	2	0	0	7	7	0	73	0	0	0	0	0	0	5	27	0	14	18	10	k__Fungi	p__unidentified_Fungi	c__unidentified_Fungi	o__unidentified_Fungi	f__unidentified_Fungi	g___unidentified_Fungi	s___unidentified_Fungi	SH030059.07FU_AB114223_refs
OTU6145	110	69	0	0	0	0	0	0	0	0	0	0	0	0	0	0	0	0	0	0	0	0	0	0	0	0	0	0	0	0	0	0	0	0	0	0	k__Fungi	p__unidentified_Fungi	c__unidentified_Fungi	o__unidentified_Fungi	f__unidentified_Fungi	g___unidentified_Fungi	s___unidentified_Fungi	New.CleanUp.ReferenceOTU99307
OTU6252	0	2	0	6	0	3	0	0	0	17	0	0	0	0	0	0	0	3	0	2	0	0	0	0	5	35	2	17	30	24	13	14	0	0	4	0	k__Fungi	p__unidentified_Fungi	c__unidentified_Fungi	o__unidentified_Fungi	f__unidentified_Fungi	g___unidentified_Fungi	s___unidentified_Fungi	New.ReferenceOTU311
OTU6209	0	0	71	1	0	0	0	0	0	0	0	0	0	38	41	6	0	0	0	1	0	0	0	0	0	0	0	0	0	0	0	0	0	0	1	0	k__Fungi	p__unidentified_Fungi	c__unidentified_Fungi	o__unidentified_Fungi	f__unidentified_Fungi	g___unidentified_Fungi	s___unidentified_Fungi	New.CleanUp.ReferenceOTU40405
OTU6022	0	0	0	0	0	1	0	15	0	4	94	16	0	0	0	0	0	0	0	0	0	0	0	0	0	0	0	0	0	0	0	0	0	0	0	0	k__Fungi	p__unidentified_Fungi	c__unidentified_Fungi	o__unidentified_Fungi	f__unidentified_Fungi	g___unidentified_Fungi	s___unidentified_Fungi	New.CleanUp.ReferenceOTU117918
OTU5999	0	0	0	0	0	4	4	0	0	0	0	0	0	0	0	0	0	16	0	0	0	0	1	0	0	5	0	9	0	17	0	19	11	24	11	0	k__Fungi	p__unidentified_Fungi	c__unidentified_Fungi	o__unidentified_Fungi	f__unidentified_Fungi	g___unidentified_Fungi	s___unidentified_Fungi	SH018936.07FU_JF755910_reps_singleton
OTU6008	0	0	0	1	0	8	0	0	0	0	15	28	0	0	0	0	0	0	18	0	8	0	2	0	0	0	0	0	0	1	1	0	1	6	0	27	k__Fungi	p__unidentified_Fungi	c__unidentified_Fungi	o__unidentified_Fungi	f__unidentified_Fungi	g___unidentified_Fungi	s___unidentified_Fungi	New.CleanUp.ReferenceOTU58337
OTU5930	0	0	9	0	0	0	0	0	0	0	0	0	0	0	0	0	0	1	0	0	0	0	0	0	10	1	1	0	1	3	18	53	0	0	0	0	k__Fungi	p__unidentified_Fungi	c__unidentified_Fungi	o__unidentified_Fungi	f__unidentified_Fungi	g___unidentified_Fungi	s___unidentified_Fungi	SH011088.07FU_HG008762_reps
OTU5938	12	1	0	0	0	4	2	0	0	0	0	0	0	18	5	12	1	8	1	4	0	0	9	0	0	2	0	0	0	0	2	3	0	0	0	0	k__Fungi	p__unidentified_Fungi	c__unidentified_Fungi	o__unidentified_Fungi	f__unidentified_Fungi	g___unidentified_Fungi	s___unidentified_Fungi	SH010348.07FU_JF449726_reps
OTU5756	15	0	1	0	0	0	0	0	0	11	0	0	33	3	0	3	0	0	0	10	0	0	0	0	0	0	0	0	0	0	0	0	0	0	0	0	k__Fungi	p__unidentified_Fungi	c__unidentified_Fungi	o__unidentified_Fungi	f__unidentified_Fungi	g___unidentified_Fungi	s___unidentified_Fungi	SH005173.07FU_KF617919_reps_singleton
OTU6414	0	0	0	0	0	0	0	0	0	0	0	0	11	32	0	21	0	0	0	4	0	0	0	0	0	0	0	0	0	0	0	0	0	0	0	0	k__Fungi	p__unidentified_Fungi	c__unidentified_Fungi	o__unidentified_Fungi	f__unidentified_Fungi	g___unidentified_Fungi	s___unidentified_Fungi	New.CleanUp.ReferenceOTU73326
OTU5685	0	0	0	0	0	0	0	0	0	0	0	0	0	0	0	0	0	36	0	0	0	0	0	0	0	31	0	0	0	0	0	0	0	0	0	0	k__Fungi	p__unidentified_Fungi	c__unidentified_Fungi	o__unidentified_Fungi	f__unidentified_Fungi	g___unidentified_Fungi	s___unidentified_Fungi	New.CleanUp.ReferenceOTU88131
OTU5817	0	0	2	0	0	0	0	0	0	0	0	0	13	0	0	0	3	6	1	0	0	13	2	0	1	0	0	0	0	1	5	9	0	3	0	0	k__Fungi	p__unidentified_Fungi	c__unidentified_Fungi	o__unidentified_Fungi	f__unidentified_Fungi	g___unidentified_Fungi	s___unidentified_Fungi	New.CleanUp.ReferenceOTU62978
OTU5589	0	0	0	0	0	0	0	0	0	0	0	0	0	0	0	0	0	0	0	0	0	0	0	57	0	0	0	0	0	0	0	0	0	0	0	0	k__Fungi	p__unidentified_Fungi	c__unidentified_Fungi	o__unidentified_Fungi	f__unidentified_Fungi	g___unidentified_Fungi	s___unidentified_Fungi	SH490202.07FU_KM374364_reps_singleton
OTU5618	0	0	5	0	0	0	0	0	0	0	0	0	12	16	0	0	0	3	3	0	0	0	0	0	0	1	1	2	2	0	0	5	0	0	0	0	k__Fungi	p__unidentified_Fungi	c__unidentified_Fungi	o__unidentified_Fungi	f__unidentified_Fungi	g___unidentified_Fungi	s___unidentified_Fungi	SH026260.07FU_GU174383_reps_singleton
OTU5441	0	0	0	2	0	0	0	5	0	0	0	0	4	0	0	0	8	0	6	0	0	13	7	0	0	0	0	0	0	0	0	0	0	0	0	0	k__Fungi	p__unidentified_Fungi	c__unidentified_Fungi	o__unidentified_Fungi	f__unidentified_Fungi	g___unidentified_Fungi	s___unidentified_Fungi	SH027407.07FU_DQ093749_reps_singleton
OTU5422	0	0	0	0	0	0	0	3	0	0	2	0	0	0	0	0	0	0	0	0	8	17	14	0	0	0	0	0	0	0	0	0	0	0	0	0	k__Fungi	p__unidentified_Fungi	c__unidentified_Fungi	o__unidentified_Fungi	f__unidentified_Fungi	g___unidentified_Fungi	s___unidentified_Fungi	SH007573.07FU_EF434002_reps_singleton
OTU5456	0	0	0	3	0	2	18	0	0	0	8	0	0	0	0	1	0	7	0	0	0	0	0	0	2	0	0	0	0	0	0	0	2	0	0	1	k__Fungi	p__unidentified_Fungi	c__unidentified_Fungi	o__unidentified_Fungi	f__unidentified_Fungi	g___unidentified_Fungi	s___unidentified_Fungi	New.CleanUp.ReferenceOTU81950
OTU5408	0	0	2	0	0	6	30	0	0	0	0	0	0	0	0	0	4	0	0	1	0	0	0	0	0	0	0	0	0	0	0	0	0	0	0	0	k__Fungi	p__unidentified_Fungi	c__unidentified_Fungi	o__unidentified_Fungi	f__unidentified_Fungi	g___unidentified_Fungi	s___unidentified_Fungi	New.CleanUp.ReferenceOTU62226
OTU5788	0	2	1	0	0	0	0	0	3	0	0	0	0	16	0	2	4	0	3	2	0	0	0	8	0	0	0	0	0	0	0	0	0	0	2	0	k__Fungi	p__unidentified_Fungi	c__unidentified_Fungi	o__unidentified_Fungi	f__unidentified_Fungi	g___unidentified_Fungi	s___unidentified_Fungi	New.CleanUp.ReferenceOTU8827
OTU5370	0	0	0	0	0	0	0	0	0	0	0	0	0	0	0	0	0	0	0	0	0	0	0	0	0	2	0	2	1	8	16	7	0	0	5	0	k__Fungi	p__unidentified_Fungi	c__unidentified_Fungi	o__unidentified_Fungi	f__unidentified_Fungi	g___unidentified_Fungi	s___unidentified_Fungi	New.CleanUp.ReferenceOTU27066
OTU5442	0	0	0	0	0	0	0	0	0	0	0	0	0	0	0	0	0	0	0	0	0	0	0	0	0	41	0	0	0	0	0	0	0	0	0	0	k__Fungi	p__unidentified_Fungi	c__unidentified_Fungi	o__unidentified_Fungi	f__unidentified_Fungi	g___unidentified_Fungi	s___unidentified_Fungi	New.CleanUp.ReferenceOTU90980
OTU5337	0	0	0	0	0	0	0	0	0	0	0	0	35	0	0	0	4	0	0	0	0	0	0	0	0	0	0	0	0	0	0	0	0	0	0	0	k__Fungi	p__unidentified_Fungi	c__unidentified_Fungi	o__unidentified_Fungi	f__unidentified_Fungi	g___unidentified_Fungi	s___unidentified_Fungi	SH027158.07FU_EF040884_reps
OTU5318	0	0	0	0	0	0	0	0	0	0	17	9	0	0	0	0	0	0	0	0	0	0	12	0	0	0	0	0	0	0	0	0	0	0	0	0	k__Fungi	p__unidentified_Fungi	c__unidentified_Fungi	o__unidentified_Fungi	f__unidentified_Fungi	g___unidentified_Fungi	s___unidentified_Fungi	New.CleanUp.ReferenceOTU71844
OTU5276	0	0	0	0	0	0	0	0	0	0	0	0	0	0	0	0	0	0	0	0	0	0	0	0	0	0	0	0	34	0	2	0	0	0	0	0	k__Fungi	p__unidentified_Fungi	c__unidentified_Fungi	o__unidentified_Fungi	f__unidentified_Fungi	g___unidentified_Fungi	s___unidentified_Fungi	New.CleanUp.ReferenceOTU99954
OTU5710	0	0	0	0	0	0	0	0	0	0	0	0	0	0	0	0	0	0	0	0	0	0	0	0	0	0	10	0	5	2	9	5	0	0	0	0	k__Fungi	p__unidentified_Fungi	c__unidentified_Fungi	o__unidentified_Fungi	f__unidentified_Fungi	g___unidentified_Fungi	s___unidentified_Fungi	New.CleanUp.ReferenceOTU66498
OTU5159	22	0	0	0	0	5	1	0	0	0	0	0	0	0	0	0	0	0	0	0	0	0	0	0	0	0	0	0	0	0	0	0	0	0	0	0	k__Fungi	p__unidentified_Fungi	c__unidentified_Fungi	o__unidentified_Fungi	f__unidentified_Fungi	g___unidentified_Fungi	s___unidentified_Fungi	New.CleanUp.ReferenceOTU9523
OTU5029	0	0	0	0	0	0	0	0	24	1	0	0	0	0	0	0	0	0	0	0	0	0	0	0	0	0	0	0	0	0	0	0	0	0	0	1	k__Fungi	p__unidentified_Fungi	c__unidentified_Fungi	o__unidentified_Fungi	f__unidentified_Fungi	g___unidentified_Fungi	s___unidentified_Fungi	SH025720.07FU_FJ554419_reps
OTU4821	0	0	0	0	0	0	0	0	0	0	0	0	16	0	0	0	1	0	0	0	0	1	2	0	0	0	0	0	0	0	0	0	0	0	0	0	k__Fungi	p__unidentified_Fungi	c__unidentified_Fungi	o__unidentified_Fungi	f__unidentified_Fungi	g___unidentified_Fungi	s___unidentified_Fungi	SH027408.07FU_KF618055_reps_singleton
OTU4792	0	0	0	0	0	0	0	0	0	0	0	0	0	19	0	0	0	0	0	0	0	0	0	0	0	0	0	0	0	0	0	0	0	0	0	0	k__Fungi	p__unidentified_Fungi	c__unidentified_Fungi	o__unidentified_Fungi	f__unidentified_Fungi	g___unidentified_Fungi	s___unidentified_Fungi	New.CleanUp.ReferenceOTU63649
OTU4737	2	0	2	1	0	1	0	0	3	0	0	0	0	5	0	0	0	0	3	0	0	0	0	0	1	0	0	0	0	0	0	0	0	0	0	0	k__Fungi	p__unidentified_Fungi	c__unidentified_Fungi	o__unidentified_Fungi	f__unidentified_Fungi	g___unidentified_Fungi	s___unidentified_Fungi	SH022211.07FU_FJ820734_reps
OTU5160	0	0	0	0	1	0	13	0	0	0	0	0	0	0	0	0	0	1	0	0	0	0	0	0	0	1	0	0	0	0	0	0	0	0	0	0	k__Fungi	p__unidentified_Fungi	c__unidentified_Fungi	o__unidentified_Fungi	f__unidentified_Fungi	g___unidentified_Fungi	s___unidentified_Fungi	New.CleanUp.ReferenceOTU80021
OTU4568	0	0	0	0	0	0	0	0	0	0	0	0	10	0	0	0	0	0	0	1	0	0	0	0	3	0	0	0	0	0	0	1	0	0	0	0	k__Fungi	p__unidentified_Fungi	c__unidentified_Fungi	o__unidentified_Fungi	f__unidentified_Fungi	g___unidentified_Fungi	s___unidentified_Fungi	New.CleanUp.ReferenceOTU30278
OTU4569	0	0	0	0	2	0	0	0	0	0	0	0	5	0	0	0	0	0	0	8	0	0	0	0	0	0	0	0	0	0	0	0	0	0	0	0	k__Fungi	p__unidentified_Fungi	c__unidentified_Fungi	o__unidentified_Fungi	f__unidentified_Fungi	g___unidentified_Fungi	s___unidentified_Fungi	New.CleanUp.ReferenceOTU79983
OTU4519	0	0	0	0	0	0	0	0	0	2	0	0	0	0	0	0	0	0	0	0	3	4	5	0	0	0	0	0	0	0	0	0	0	0	0	0	k__Fungi	p__unidentified_Fungi	c__unidentified_Fungi	o__unidentified_Fungi	f__unidentified_Fungi	g___unidentified_Fungi	s___unidentified_Fungi	New.CleanUp.ReferenceOTU20010
OTU4520	0	0	0	0	0	0	0	0	0	6	0	8	0	0	0	0	0	0	0	0	0	0	0	0	0	0	0	0	0	0	0	0	0	0	0	0	k__Fungi	p__unidentified_Fungi	c__unidentified_Fungi	o__unidentified_Fungi	f__unidentified_Fungi	g___unidentified_Fungi	s___unidentified_Fungi	New.CleanUp.ReferenceOTU86875
OTU4442	0	0	0	0	0	0	0	0	0	0	0	0	0	0	2	0	0	0	0	0	0	0	0	11	0	0	0	0	0	0	0	0	0	0	0	0	k__Fungi	p__unidentified_Fungi	c__unidentified_Fungi	o__unidentified_Fungi	f__unidentified_Fungi	g___unidentified_Fungi	s___unidentified_Fungi	New.CleanUp.ReferenceOTU48309
OTU4261	0	0	0	0	0	0	0	0	0	0	0	0	0	0	0	0	0	0	0	0	0	0	0	0	0	0	0	11	0	0	0	0	0	0	0	0	k__Fungi	p__unidentified_Fungi	c__unidentified_Fungi	o__unidentified_Fungi	f__unidentified_Fungi	g___unidentified_Fungi	s___unidentified_Fungi	SH487853.07FU_KT215295_reps_singleton
OTU4164	0	0	0	0	0	4	4	0	0	0	0	0	0	0	0	0	0	0	0	0	0	0	0	0	0	0	0	2	0	0	0	0	0	0	0	0	k__Fungi	p__unidentified_Fungi	c__unidentified_Fungi	o__unidentified_Fungi	f__unidentified_Fungi	g___unidentified_Fungi	s___unidentified_Fungi	SH476292.07FU_KF617430_reps_singleton
OTU4263	0	2	0	0	0	0	8	0	0	0	0	0	0	0	0	0	0	0	0	0	0	0	0	0	0	0	0	0	0	0	0	0	0	0	0	0	k__Fungi	p__unidentified_Fungi	c__unidentified_Fungi	o__unidentified_Fungi	f__unidentified_Fungi	g___unidentified_Fungi	s___unidentified_Fungi	SH023586.07FU_AY969995_reps_singleton
OTU4055	0	0	0	0	0	0	0	0	0	0	0	0	0	0	0	0	0	0	0	0	0	9	0	0	0	0	0	0	0	0	0	0	0	0	0	0	k__Fungi	p__unidentified_Fungi	c__unidentified_Fungi	o__unidentified_Fungi	f__unidentified_Fungi	g___unidentified_Fungi	s___unidentified_Fungi	New.CleanUp.ReferenceOTU20036
OTU4855	0	0	0	0	0	0	0	0	0	0	0	0	0	3	0	0	0	0	0	0	0	5	0	1	0	0	0	0	0	0	0	0	0	0	0	0	k__Fungi	p__unidentified_Fungi	c__unidentified_Fungi	o__unidentified_Fungi	f__unidentified_Fungi	g___unidentified_Fungi	s___unidentified_Fungi	New.CleanUp.ReferenceOTU98360
OTU3918	0	0	0	0	1	0	0	0	0	0	0	0	7	0	0	0	0	0	0	0	0	0	0	0	0	0	0	0	0	0	0	0	0	0	0	0	k__Fungi	p__unidentified_Fungi	c__unidentified_Fungi	o__unidentified_Fungi	f__unidentified_Fungi	g___unidentified_Fungi	s___unidentified_Fungi	New.CleanUp.ReferenceOTU88461
OTU4262	0	0	0	0	0	0	0	0	0	0	0	0	0	0	0	0	0	0	0	0	0	0	0	0	0	0	0	0	3	0	0	0	5	0	0	0	k__Fungi	p__unidentified_Fungi	c__unidentified_Fungi	o__unidentified_Fungi	f__unidentified_Fungi	g___unidentified_Fungi	s___unidentified_Fungi	SH019548.07FU_DQ309148_reps
OTU3748	0	0	0	0	0	0	0	6	1	0	0	0	0	0	0	0	0	0	0	0	0	0	0	0	0	0	0	0	0	0	0	0	0	0	0	0	k__Fungi	p__unidentified_Fungi	c__unidentified_Fungi	o__unidentified_Fungi	f__unidentified_Fungi	g___unidentified_Fungi	s___unidentified_Fungi	SH012717.07FU_KJ834357_reps
OTU3749	0	0	0	0	0	0	0	0	0	0	0	7	0	0	0	0	0	0	0	0	0	0	0	0	0	0	0	0	0	0	0	0	0	0	0	0	k__Fungi	p__unidentified_Fungi	c__unidentified_Fungi	o__unidentified_Fungi	f__unidentified_Fungi	g___unidentified_Fungi	s___unidentified_Fungi	SH015854.07FU_KF297145_reps_singleton
OTU4054	0	0	0	0	0	0	0	4	0	0	0	0	0	0	3	0	0	0	0	0	0	0	0	0	0	0	0	0	0	0	0	0	0	0	0	0	k__Fungi	p__unidentified_Fungi	c__unidentified_Fungi	o__unidentified_Fungi	f__unidentified_Fungi	g___unidentified_Fungi	s___unidentified_Fungi	SH016702.07FU_AY254051_refs_singleton
OTU3752	0	0	0	0	0	0	0	0	0	0	0	0	4	0	0	0	0	0	0	0	0	0	0	0	0	1	0	0	1	0	0	0	0	0	0	0	k__Fungi	p__unidentified_Fungi	c__unidentified_Fungi	o__unidentified_Fungi	f__unidentified_Fungi	g___unidentified_Fungi	s___unidentified_Fungi	New.CleanUp.ReferenceOTU114403
OTU4443	0	0	0	0	0	0	0	1	4	0	0	0	0	0	1	0	0	0	0	0	0	0	0	0	0	0	0	0	0	0	0	0	0	0	0	0	k__Fungi	p__unidentified_Fungi	c__unidentified_Fungi	o__unidentified_Fungi	f__unidentified_Fungi	g___unidentified_Fungi	s___unidentified_Fungi	New.CleanUp.ReferenceOTU111146
OTU3329	0	4	0	0	0	0	0	0	0	0	0	1	0	0	0	0	0	0	0	0	0	0	0	0	0	0	0	0	0	0	0	0	0	0	0	0	k__Fungi	p__unidentified_Fungi	c__unidentified_Fungi	o__unidentified_Fungi	f__unidentified_Fungi	g___unidentified_Fungi	s___unidentified_Fungi	New.CleanUp.ReferenceOTU10868
OTU3331	0	0	0	0	0	0	3	2	0	0	0	0	0	0	0	0	0	0	0	0	0	0	0	0	0	0	0	0	0	0	0	0	0	0	0	0	k__Fungi	p__unidentified_Fungi	c__unidentified_Fungi	o__unidentified_Fungi	f__unidentified_Fungi	g___unidentified_Fungi	s___unidentified_Fungi	New.CleanUp.ReferenceOTU44771
OTU3753	0	0	3	0	0	0	0	0	0	0	0	0	0	0	0	0	0	0	0	0	0	0	0	0	0	0	0	1	0	0	0	1	0	0	0	0	k__Fungi	p__unidentified_Fungi	c__unidentified_Fungi	o__unidentified_Fungi	f__unidentified_Fungi	g___unidentified_Fungi	s___unidentified_Fungi	New.CleanUp.ReferenceOTU118283
OTU2957	0	0	4	0	0	0	0	0	0	0	0	0	0	0	0	0	0	0	0	0	0	0	0	0	0	0	0	0	0	0	0	0	0	0	0	0	k__Fungi	p__unidentified_Fungi	c__unidentified_Fungi	o__unidentified_Fungi	f__unidentified_Fungi	g___unidentified_Fungi	s___unidentified_Fungi	SH017789.07FU_JN104564_reps_singleton
OTU2958	0	0	0	0	0	0	0	0	0	0	0	0	0	0	0	0	0	0	4	0	0	0	0	0	0	0	0	0	0	0	0	0	0	0	0	0	k__Fungi	p__unidentified_Fungi	c__unidentified_Fungi	o__unidentified_Fungi	f__unidentified_Fungi	g___unidentified_Fungi	s___unidentified_Fungi	SH018556.07FU_FM199968_reps
OTU2959	0	0	4	0	0	0	0	0	0	0	0	0	0	0	0	0	0	0	0	0	0	0	0	0	0	0	0	0	0	0	0	0	0	0	0	0	k__Fungi	p__unidentified_Fungi	c__unidentified_Fungi	o__unidentified_Fungi	f__unidentified_Fungi	g___unidentified_Fungi	s___unidentified_Fungi	SH001637.07FU_JF519052_reps
OTU2961	0	0	0	0	0	0	0	0	0	0	0	0	0	0	0	0	0	0	0	0	0	0	0	0	0	0	0	4	0	0	0	0	0	0	0	0	k__Fungi	p__unidentified_Fungi	c__unidentified_Fungi	o__unidentified_Fungi	f__unidentified_Fungi	g___unidentified_Fungi	s___unidentified_Fungi	New.CleanUp.ReferenceOTU102001
OTU4264	0	0	1	0	0	0	0	0	0	0	0	0	0	0	0	0	3	0	0	0	0	0	0	0	0	0	0	0	0	0	0	0	0	0	0	0	k__Fungi	p__unidentified_Fungi	c__unidentified_Fungi	o__unidentified_Fungi	f__unidentified_Fungi	g___unidentified_Fungi	s___unidentified_Fungi	New.CleanUp.ReferenceOTU23009
OTU2393	0	0	0	0	0	0	0	0	0	0	0	0	0	0	0	0	0	0	0	0	0	0	0	0	0	0	0	2	0	0	0	1	0	0	0	0	k__Fungi	p__unidentified_Fungi	c__unidentified_Fungi	o__unidentified_Fungi	f__unidentified_Fungi	g___unidentified_Fungi	s___unidentified_Fungi	SH492696.07FU_KP889780_reps_singleton
OTU2394	0	0	0	0	0	0	0	0	0	0	0	0	0	0	0	0	0	0	0	0	0	0	0	0	0	0	0	0	0	0	0	0	0	0	3	0	k__Fungi	p__unidentified_Fungi	c__unidentified_Fungi	o__unidentified_Fungi	f__unidentified_Fungi	g___unidentified_Fungi	s___unidentified_Fungi	SH488590.07FU_KU195580_reps_singleton
OTU2395	0	0	0	0	0	0	0	0	0	0	0	0	0	0	0	0	0	0	0	0	0	0	0	0	0	0	0	0	0	0	0	3	0	0	0	0	k__Fungi	p__unidentified_Fungi	c__unidentified_Fungi	o__unidentified_Fungi	f__unidentified_Fungi	g___unidentified_Fungi	s___unidentified_Fungi	SH010289.07FU_AF444322_refs
OTU2396	0	0	1	0	0	0	0	0	0	0	0	0	0	0	0	0	0	0	0	0	0	0	0	0	0	0	0	0	2	0	0	0	0	0	0	0	k__Fungi	p__unidentified_Fungi	c__unidentified_Fungi	o__unidentified_Fungi	f__unidentified_Fungi	g___unidentified_Fungi	s___unidentified_Fungi	SH024417.07FU_JF519018_reps
OTU2398	0	0	0	0	0	0	0	0	0	0	0	0	0	0	0	0	0	0	0	0	0	0	0	0	0	0	0	0	0	0	0	0	0	0	0	3	k__Fungi	p__unidentified_Fungi	c__unidentified_Fungi	o__unidentified_Fungi	f__unidentified_Fungi	g___unidentified_Fungi	s___unidentified_Fungi	New.CleanUp.ReferenceOTU7571
OTU2399	0	0	0	0	0	0	0	0	0	0	0	0	0	0	0	0	0	0	0	0	0	0	0	0	0	0	0	0	0	0	2	0	0	0	1	0	k__Fungi	p__unidentified_Fungi	c__unidentified_Fungi	o__unidentified_Fungi	f__unidentified_Fungi	g___unidentified_Fungi	s___unidentified_Fungi	New.CleanUp.ReferenceOTU27354
OTU2402	0	0	0	0	0	0	0	0	0	0	0	0	0	0	3	0	0	0	0	0	0	0	0	0	0	0	0	0	0	0	0	0	0	0	0	0	k__Fungi	p__unidentified_Fungi	c__unidentified_Fungi	o__unidentified_Fungi	f__unidentified_Fungi	g___unidentified_Fungi	s___unidentified_Fungi	New.CleanUp.ReferenceOTU91968
OTU2403	0	0	0	0	0	0	0	0	0	0	0	0	0	0	0	0	0	0	0	0	0	0	0	0	0	0	0	3	0	0	0	0	0	0	0	0	k__Fungi	p__unidentified_Fungi	c__unidentified_Fungi	o__unidentified_Fungi	f__unidentified_Fungi	g___unidentified_Fungi	s___unidentified_Fungi	New.CleanUp.ReferenceOTU114107
OTU2404	0	0	0	0	0	0	0	0	0	0	0	0	0	0	0	0	0	0	0	0	2	0	1	0	0	0	0	0	0	0	0	0	0	0	0	0	k__Fungi	p__unidentified_Fungi	c__unidentified_Fungi	o__unidentified_Fungi	f__unidentified_Fungi	g___unidentified_Fungi	s___unidentified_Fungi	New.CleanUp.ReferenceOTU116349
OTU3332	0	0	0	0	0	0	0	0	1	0	0	0	0	0	2	0	0	0	0	0	0	0	0	0	0	0	0	0	0	0	0	0	0	0	0	0	k__Fungi	p__unidentified_Fungi	c__unidentified_Fungi	o__unidentified_Fungi	f__unidentified_Fungi	g___unidentified_Fungi	s___unidentified_Fungi	New.CleanUp.ReferenceOTU114685
OTU3750	0	0	0	0	0	0	0	0	0	0	0	0	0	0	0	0	0	0	0	0	0	1	0	0	0	0	0	0	0	0	0	0	0	1	1	0	k__Fungi	p__unidentified_Fungi	c__unidentified_Fungi	o__unidentified_Fungi	f__unidentified_Fungi	g___unidentified_Fungi	s___unidentified_Fungi	SH019820.07FU_EU480223_reps
OTU1156	0	0	0	0	0	2	0	0	0	0	0	0	0	0	0	0	0	0	0	0	0	0	0	0	0	0	0	0	0	0	0	0	0	0	0	0	k__Fungi	p__unidentified_Fungi	c__unidentified_Fungi	o__unidentified_Fungi	f__unidentified_Fungi	g___unidentified_Fungi	s___unidentified_Fungi	SH492673.07FU_KP889904_reps_singleton
OTU1157	0	0	0	0	0	0	0	0	0	0	0	0	0	0	0	0	0	0	0	0	0	0	0	0	0	0	0	2	0	0	0	0	0	0	0	0	k__Fungi	p__unidentified_Fungi	c__unidentified_Fungi	o__unidentified_Fungi	f__unidentified_Fungi	g___unidentified_Fungi	s___unidentified_Fungi	SH497320.07FU_LN997710_reps_singleton
OTU1159	0	0	0	0	0	0	0	0	0	0	0	0	0	0	0	2	0	0	0	0	0	0	0	0	0	0	0	0	0	0	0	0	0	0	0	0	k__Fungi	p__unidentified_Fungi	c__unidentified_Fungi	o__unidentified_Fungi	f__unidentified_Fungi	g___unidentified_Fungi	s___unidentified_Fungi	SH494317.07FU_KM504425_reps_singleton
OTU1160	0	1	1	0	0	0	0	0	0	0	0	0	0	0	0	0	0	0	0	0	0	0	0	0	0	0	0	0	0	0	0	0	0	0	0	0	k__Fungi	p__unidentified_Fungi	c__unidentified_Fungi	o__unidentified_Fungi	f__unidentified_Fungi	g___unidentified_Fungi	s___unidentified_Fungi	SH015941.07FU_KF823589_reps
OTU1161	1	0	0	0	0	0	0	1	0	0	0	0	0	0	0	0	0	0	0	0	0	0	0	0	0	0	0	0	0	0	0	0	0	0	0	0	k__Fungi	p__unidentified_Fungi	c__unidentified_Fungi	o__unidentified_Fungi	f__unidentified_Fungi	g___unidentified_Fungi	s___unidentified_Fungi	New.CleanUp.ReferenceOTU1297
OTU1162	0	0	0	0	0	0	0	0	0	0	0	0	0	0	0	0	0	0	0	0	0	0	0	0	0	0	0	2	0	0	0	0	0	0	0	0	k__Fungi	p__unidentified_Fungi	c__unidentified_Fungi	o__unidentified_Fungi	f__unidentified_Fungi	g___unidentified_Fungi	s___unidentified_Fungi	New.CleanUp.ReferenceOTU14376
OTU1164	0	0	0	0	0	0	1	1	0	0	0	0	0	0	0	0	0	0	0	0	0	0	0	0	0	0	0	0	0	0	0	0	0	0	0	0	k__Fungi	p__unidentified_Fungi	c__unidentified_Fungi	o__unidentified_Fungi	f__unidentified_Fungi	g___unidentified_Fungi	s___unidentified_Fungi	New.CleanUp.ReferenceOTU25075
OTU1166	0	0	0	0	0	0	0	0	0	0	0	0	0	0	0	0	0	0	0	0	0	0	0	0	0	0	0	2	0	0	0	0	0	0	0	0	k__Fungi	p__unidentified_Fungi	c__unidentified_Fungi	o__unidentified_Fungi	f__unidentified_Fungi	g___unidentified_Fungi	s___unidentified_Fungi	New.CleanUp.ReferenceOTU39657
OTU1167	0	0	0	0	0	0	0	0	0	2	0	0	0	0	0	0	0	0	0	0	0	0	0	0	0	0	0	0	0	0	0	0	0	0	0	0	k__Fungi	p__unidentified_Fungi	c__unidentified_Fungi	o__unidentified_Fungi	f__unidentified_Fungi	g___unidentified_Fungi	s___unidentified_Fungi	New.CleanUp.ReferenceOTU40065
OTU1169	0	0	0	0	0	0	0	0	0	0	0	0	0	0	0	0	0	0	0	0	0	0	0	0	1	0	0	0	1	0	0	0	0	0	0	0	k__Fungi	p__unidentified_Fungi	c__unidentified_Fungi	o__unidentified_Fungi	f__unidentified_Fungi	g___unidentified_Fungi	s___unidentified_Fungi	New.CleanUp.ReferenceOTU76072
OTU1170	0	0	2	0	0	0	0	0	0	0	0	0	0	0	0	0	0	0	0	0	0	0	0	0	0	0	0	0	0	0	0	0	0	0	0	0	k__Fungi	p__unidentified_Fungi	c__unidentified_Fungi	o__unidentified_Fungi	f__unidentified_Fungi	g___unidentified_Fungi	s___unidentified_Fungi	New.CleanUp.ReferenceOTU97003
OTU1171	0	0	0	0	0	0	0	0	0	0	0	0	0	0	0	0	0	0	0	0	0	0	0	0	0	0	0	0	0	0	0	2	0	0	0	0	k__Fungi	p__unidentified_Fungi	c__unidentified_Fungi	o__unidentified_Fungi	f__unidentified_Fungi	g___unidentified_Fungi	s___unidentified_Fungi	New.CleanUp.ReferenceOTU101184
OTU1172	0	0	0	0	0	0	0	0	0	0	0	0	0	0	0	0	0	0	0	2	0	0	0	0	0	0	0	0	0	0	0	0	0	0	0	0	k__Fungi	p__unidentified_Fungi	c__unidentified_Fungi	o__unidentified_Fungi	f__unidentified_Fungi	g___unidentified_Fungi	s___unidentified_Fungi	New.CleanUp.ReferenceOTU113709
OTU2397	0	0	0	0	0	0	0	0	0	0	0	0	0	0	0	0	0	2	0	0	0	0	0	0	0	0	0	0	0	0	0	0	0	0	0	0	k__Fungi	p__unidentified_Fungi	c__unidentified_Fungi	o__unidentified_Fungi	f__unidentified_Fungi	g___unidentified_Fungi	s___unidentified_Fungi	New.CleanUp.ReferenceOTU2774
OTU2401	0	0	0	0	0	0	0	0	0	0	0	0	0	0	0	0	0	0	0	0	0	0	1	0	0	0	0	0	0	0	0	0	0	1	0	0	k__Fungi	p__unidentified_Fungi	c__unidentified_Fungi	o__unidentified_Fungi	f__unidentified_Fungi	g___unidentified_Fungi	s___unidentified_Fungi	New.CleanUp.ReferenceOTU83870
OTU1	0	0	0	0	0	0	0	0	0	0	0	0	0	0	0	0	0	0	0	0	0	0	0	0	0	0	0	0	0	1	0	0	0	0	0	0	k__Fungi	p__unidentified_Fungi	c__unidentified_Fungi	o__unidentified_Fungi	f__unidentified_Fungi	g___unidentified_Fungi	s___unidentified_Fungi	SH024992.07FU_AM999605_reps_singleton
OTU2	0	0	0	0	0	0	0	0	0	0	0	0	0	0	0	0	0	0	0	0	0	0	0	0	0	0	0	0	0	0	1	0	0	0	0	0	k__Fungi	p__unidentified_Fungi	c__unidentified_Fungi	o__unidentified_Fungi	f__unidentified_Fungi	g___unidentified_Fungi	s___unidentified_Fungi	SH012782.07FU_HM123462_reps
OTU3	1	0	0	0	0	0	0	0	0	0	0	0	0	0	0	0	0	0	0	0	0	0	0	0	0	0	0	0	0	0	0	0	0	0	0	0	k__Fungi	p__unidentified_Fungi	c__unidentified_Fungi	o__unidentified_Fungi	f__unidentified_Fungi	g___unidentified_Fungi	s___unidentified_Fungi	SH471427.07FU_AM999647_reps
OTU4	0	0	0	0	0	0	0	0	0	0	0	0	0	0	0	1	0	0	0	0	0	0	0	0	0	0	0	0	0	0	0	0	0	0	0	0	k__Fungi	p__unidentified_Fungi	c__unidentified_Fungi	o__unidentified_Fungi	f__unidentified_Fungi	g___unidentified_Fungi	s___unidentified_Fungi	SH017788.07FU_AJ007843_refs
OTU5	0	0	0	0	0	0	0	0	0	0	0	0	1	0	0	0	0	0	0	0	0	0	0	0	0	0	0	0	0	0	0	0	0	0	0	0	k__Fungi	p__unidentified_Fungi	c__unidentified_Fungi	o__unidentified_Fungi	f__unidentified_Fungi	g___unidentified_Fungi	s___unidentified_Fungi	SH027768.07FU_KJ411453_reps_singleton
OTU6	0	0	0	0	0	0	0	1	0	0	0	0	0	0	0	0	0	0	0	0	0	0	0	0	0	0	0	0	0	0	0	0	0	0	0	0	k__Fungi	p__unidentified_Fungi	c__unidentified_Fungi	o__unidentified_Fungi	f__unidentified_Fungi	g___unidentified_Fungi	s___unidentified_Fungi	New.CleanUp.ReferenceOTU4855
OTU7	0	0	0	0	0	0	0	1	0	0	0	0	0	0	0	0	0	0	0	0	0	0	0	0	0	0	0	0	0	0	0	0	0	0	0	0	k__Fungi	p__unidentified_Fungi	c__unidentified_Fungi	o__unidentified_Fungi	f__unidentified_Fungi	g___unidentified_Fungi	s___unidentified_Fungi	New.CleanUp.ReferenceOTU17791
OTU8	0	0	0	0	0	0	0	0	0	0	0	0	1	0	0	0	0	0	0	0	0	0	0	0	0	0	0	0	0	0	0	0	0	0	0	0	k__Fungi	p__unidentified_Fungi	c__unidentified_Fungi	o__unidentified_Fungi	f__unidentified_Fungi	g___unidentified_Fungi	s___unidentified_Fungi	New.CleanUp.ReferenceOTU20790
OTU9	0	0	0	0	0	0	0	0	0	0	0	0	0	0	0	0	0	0	0	0	0	0	0	1	0	0	0	0	0	0	0	0	0	0	0	0	k__Fungi	p__unidentified_Fungi	c__unidentified_Fungi	o__unidentified_Fungi	f__unidentified_Fungi	g___unidentified_Fungi	s___unidentified_Fungi	New.CleanUp.ReferenceOTU23488
OTU10	0	0	0	0	0	0	0	1	0	0	0	0	0	0	0	0	0	0	0	0	0	0	0	0	0	0	0	0	0	0	0	0	0	0	0	0	k__Fungi	p__unidentified_Fungi	c__unidentified_Fungi	o__unidentified_Fungi	f__unidentified_Fungi	g___unidentified_Fungi	s___unidentified_Fungi	New.CleanUp.ReferenceOTU24784
OTU11	0	0	0	0	0	1	0	0	0	0	0	0	0	0	0	0	0	0	0	0	0	0	0	0	0	0	0	0	0	0	0	0	0	0	0	0	k__Fungi	p__unidentified_Fungi	c__unidentified_Fungi	o__unidentified_Fungi	f__unidentified_Fungi	g___unidentified_Fungi	s___unidentified_Fungi	New.CleanUp.ReferenceOTU28721
OTU12	0	0	0	0	0	0	0	0	0	0	0	0	0	0	0	0	0	0	0	0	0	0	0	0	0	0	0	0	0	0	0	0	0	0	0	1	k__Fungi	p__unidentified_Fungi	c__unidentified_Fungi	o__unidentified_Fungi	f__unidentified_Fungi	g___unidentified_Fungi	s___unidentified_Fungi	New.CleanUp.ReferenceOTU37966
OTU13	0	0	0	0	0	0	1	0	0	0	0	0	0	0	0	0	0	0	0	0	0	0	0	0	0	0	0	0	0	0	0	0	0	0	0	0	k__Fungi	p__unidentified_Fungi	c__unidentified_Fungi	o__unidentified_Fungi	f__unidentified_Fungi	g___unidentified_Fungi	s___unidentified_Fungi	New.CleanUp.ReferenceOTU38113
OTU14	0	0	0	0	0	0	0	1	0	0	0	0	0	0	0	0	0	0	0	0	0	0	0	0	0	0	0	0	0	0	0	0	0	0	0	0	k__Fungi	p__unidentified_Fungi	c__unidentified_Fungi	o__unidentified_Fungi	f__unidentified_Fungi	g___unidentified_Fungi	s___unidentified_Fungi	New.CleanUp.ReferenceOTU44753
OTU17	0	0	0	0	0	0	0	1	0	0	0	0	0	0	0	0	0	0	0	0	0	0	0	0	0	0	0	0	0	0	0	0	0	0	0	0	k__Fungi	p__unidentified_Fungi	c__unidentified_Fungi	o__unidentified_Fungi	f__unidentified_Fungi	g___unidentified_Fungi	s___unidentified_Fungi	New.CleanUp.ReferenceOTU61590
OTU18	0	0	0	0	0	0	0	0	0	0	0	0	0	0	0	0	0	1	0	0	0	0	0	0	0	0	0	0	0	0	0	0	0	0	0	0	k__Fungi	p__unidentified_Fungi	c__unidentified_Fungi	o__unidentified_Fungi	f__unidentified_Fungi	g___unidentified_Fungi	s___unidentified_Fungi	New.CleanUp.ReferenceOTU72635
OTU19	0	0	0	0	0	0	0	0	0	0	0	0	0	0	0	0	0	0	0	0	0	0	0	0	0	0	0	0	0	0	1	0	0	0	0	0	k__Fungi	p__unidentified_Fungi	c__unidentified_Fungi	o__unidentified_Fungi	f__unidentified_Fungi	g___unidentified_Fungi	s___unidentified_Fungi	New.CleanUp.ReferenceOTU84618
OTU20	0	0	0	0	0	0	0	1	0	0	0	0	0	0	0	0	0	0	0	0	0	0	0	0	0	0	0	0	0	0	0	0	0	0	0	0	k__Fungi	p__unidentified_Fungi	c__unidentified_Fungi	o__unidentified_Fungi	f__unidentified_Fungi	g___unidentified_Fungi	s___unidentified_Fungi	New.CleanUp.ReferenceOTU88839
OTU21	0	0	0	0	0	0	0	1	0	0	0	0	0	0	0	0	0	0	0	0	0	0	0	0	0	0	0	0	0	0	0	0	0	0	0	0	k__Fungi	p__unidentified_Fungi	c__unidentified_Fungi	o__unidentified_Fungi	f__unidentified_Fungi	g___unidentified_Fungi	s___unidentified_Fungi	New.CleanUp.ReferenceOTU89517
OTU22	0	0	0	0	0	0	0	1	0	0	0	0	0	0	0	0	0	0	0	0	0	0	0	0	0	0	0	0	0	0	0	0	0	0	0	0	k__Fungi	p__unidentified_Fungi	c__unidentified_Fungi	o__unidentified_Fungi	f__unidentified_Fungi	g___unidentified_Fungi	s___unidentified_Fungi	New.CleanUp.ReferenceOTU92920
OTU23	0	0	0	0	0	0	0	1	0	0	0	0	0	0	0	0	0	0	0	0	0	0	0	0	0	0	0	0	0	0	0	0	0	0	0	0	k__Fungi	p__unidentified_Fungi	c__unidentified_Fungi	o__unidentified_Fungi	f__unidentified_Fungi	g___unidentified_Fungi	s___unidentified_Fungi	New.CleanUp.ReferenceOTU104056
OTU24	0	0	0	0	0	0	0	1	0	0	0	0	0	0	0	0	0	0	0	0	0	0	0	0	0	0	0	0	0	0	0	0	0	0	0	0	k__Fungi	p__unidentified_Fungi	c__unidentified_Fungi	o__unidentified_Fungi	f__unidentified_Fungi	g___unidentified_Fungi	s___unidentified_Fungi	New.CleanUp.ReferenceOTU105325
OTU25	0	0	0	0	0	0	0	1	0	0	0	0	0	0	0	0	0	0	0	0	0	0	0	0	0	0	0	0	0	0	0	0	0	0	0	0	k__Fungi	p__unidentified_Fungi	c__unidentified_Fungi	o__unidentified_Fungi	f__unidentified_Fungi	g___unidentified_Fungi	s___unidentified_Fungi	New.CleanUp.ReferenceOTU112872
OTU27	0	0	0	0	0	0	0	1	0	0	0	0	0	0	0	0	0	0	0	0	0	0	0	0	0	0	0	0	0	0	0	0	0	0	0	0	k__Fungi	p__unidentified_Fungi	c__unidentified_Fungi	o__unidentified_Fungi	f__unidentified_Fungi	g___unidentified_Fungi	s___unidentified_Fungi	New.CleanUp.ReferenceOTU121033
OTU28	0	0	0	0	0	0	1	0	0	0	0	0	0	0	0	0	0	0	0	0	0	0	0	0	0	0	0	0	0	0	0	0	0	0	0	0	k__Fungi	p__unidentified_Fungi	c__unidentified_Fungi	o__unidentified_Fungi	f__unidentified_Fungi	g___unidentified_Fungi	s___unidentified_Fungi	New.CleanUp.ReferenceOTU121863
OTU1158	0	0	0	0	0	0	0	0	0	0	0	0	0	0	0	0	0	0	0	1	0	0	0	0	0	0	0	0	0	0	0	0	0	0	0	0	k__Fungi	p__unidentified_Fungi	c__unidentified_Fungi	o__unidentified_Fungi	f__unidentified_Fungi	g___unidentified_Fungi	s___unidentified_Fungi	SH026230.07FU_HM439584_reps_singleton
OTU1168	0	0	0	0	0	0	0	0	0	0	0	0	0	0	0	0	0	0	0	0	0	0	0	0	0	0	0	0	1	0	0	0	0	0	0	0	k__Fungi	p__unidentified_Fungi	c__unidentified_Fungi	o__unidentified_Fungi	f__unidentified_Fungi	g___unidentified_Fungi	s___unidentified_Fungi	New.CleanUp.ReferenceOTU64556
OTU2400	0	0	0	0	0	0	0	0	0	0	0	0	0	0	0	0	0	0	0	0	0	0	0	0	0	0	0	0	1	0	0	0	0	0	0	0	k__Fungi	p__unidentified_Fungi	c__unidentified_Fungi	o__unidentified_Fungi	f__unidentified_Fungi	g___unidentified_Fungi	s___unidentified_Fungi	New.CleanUp.ReferenceOTU48642
OTU2960	0	1	0	0	0	0	0	0	0	0	0	0	0	0	0	0	0	0	0	0	0	0	0	0	0	0	0	0	0	0	0	0	0	0	0	0	k__Fungi	p__unidentified_Fungi	c__unidentified_Fungi	o__unidentified_Fungi	f__unidentified_Fungi	g___unidentified_Fungi	s___unidentified_Fungi	New.CleanUp.ReferenceOTU37868
OTU3751	0	0	0	0	0	0	0	0	0	0	0	0	0	0	0	0	1	0	0	0	0	0	0	0	0	0	0	0	0	0	0	0	0	0	0	0	k__Fungi	p__unidentified_Fungi	c__unidentified_Fungi	o__unidentified_Fungi	f__unidentified_Fungi	g___unidentified_Fungi	s___unidentified_Fungi	New.CleanUp.ReferenceOTU93431
OTU7003	262	78	643	236	89	280	447	195	209	9	15	10	2157	2210	872	393	308	575	1365	424	200	109	111	0	141	354	263	168	1101	550	456	530	27	30	144	167	k__Fungi	p__Ascomycota	c__unidentified_Ascomycota	o__unidentified_Ascomycota	f__unidentified_Ascomycota	g__unidentified_Ascomycota	s__unidentified_Ascomycota	SH013921.07FU_KF981440_refs
OTU6995	147	21	120	23	3	22	69	551	178	240	85	120	1592	294	870	176	427	298	855	89	1211	581	741	318	0	0	282	7	70	17	2	31	184	0	6	8	k__Fungi	p__Ascomycota	c__unidentified_Ascomycota	o__unidentified_Ascomycota	f__unidentified_Ascomycota	g__unidentified_Ascomycota	s__unidentified_Ascomycota	SH493450.07FU_HG937035_reps
OTU6977	70	41	94	104	180	9	4	28	0	0	0	0	637	17	255	1	72	1415	82	192	0	0	0	0	183	736	552	876	734	286	453	316	0	1	0	7	k__Fungi	p__Ascomycota	c__unidentified_Ascomycota	o__unidentified_Ascomycota	f__unidentified_Ascomycota	g__unidentified_Ascomycota	s__unidentified_Ascomycota	SH016884.07FU_AY394919_reps
OTU6929	98	37	39	159	47	12	142	148	295	261	352	272	335	78	44	14	17	10	68	21	283	175	288	281	1	1	1	0	5	6	0	5	117	96	64	88	k__Fungi	p__Ascomycota	c__unidentified_Ascomycota	o__unidentified_Ascomycota	f__unidentified_Ascomycota	g__unidentified_Ascomycota	s__unidentified_Ascomycota	SH016191.07FU_JN995638_refs
OTU6899	1	0	0	0	0	3	0	6	0	0	0	0	0	3	0	0	0	0	0	0	0	0	0	0	25	59	134	14	131	631	1422	519	0	0	0	0	k__Fungi	p__Ascomycota	c__unidentified_Ascomycota	o__unidentified_Ascomycota	f__unidentified_Ascomycota	g__unidentified_Ascomycota	s__unidentified_Ascomycota	New.ReferenceOTU367
OTU6874	0	2	1	0	0	0	0	33	1	80	127	1262	24	0	0	0	0	5	0	0	106	32	6	25	0	0	0	0	1	0	0	0	46	108	173	167	k__Fungi	p__Ascomycota	c__unidentified_Ascomycota	o__unidentified_Ascomycota	f__unidentified_Ascomycota	g__unidentified_Ascomycota	s__unidentified_Ascomycota	SH029814.07FU_AB671495_refs
OTU6840	85	17	256	25	10	11	19	19	3	0	0	0	241	98	73	56	8	13	96	56	1	0	0	0	81	97	8	1	177	50	19	160	6	27	1	7	k__Fungi	p__Ascomycota	c__unidentified_Ascomycota	o__unidentified_Ascomycota	f__unidentified_Ascomycota	g__unidentified_Ascomycota	s__unidentified_Ascomycota	SH024549.07FU_EU437434_reps
OTU6817	21	6	10	0	0	0	0	8	9	41	96	73	213	32	32	11	38	5	77	19	212	101	143	42	0	0	0	2	1	0	0	0	7	0	0	0	k__Fungi	p__Ascomycota	c__unidentified_Ascomycota	o__unidentified_Ascomycota	f__unidentified_Ascomycota	g__unidentified_Ascomycota	s__unidentified_Ascomycota	New.ReferenceOTU506
OTU6743	0	1	5	0	4	2	19	8	0	0	0	0	0	21	2	6	2	23	4	2	0	0	0	0	79	103	4	10	277	34	56	183	1	16	5	0	k__Fungi	p__Ascomycota	c__unidentified_Ascomycota	o__unidentified_Ascomycota	f__unidentified_Ascomycota	g__unidentified_Ascomycota	s__unidentified_Ascomycota	SH013609.07FU_LM652379_refs
OTU6783	77	47	3	0	0	2	1	41	3	34	33	34	44	35	88	20	10	20	38	10	32	6	20	59	0	0	6	0	11	0	0	8	14	0	4	14	k__Fungi	p__Ascomycota	c__unidentified_Ascomycota	o__unidentified_Ascomycota	f__unidentified_Ascomycota	g__unidentified_Ascomycota	s__unidentified_Ascomycota	New.ReferenceOTU432
OTU6664	12	0	89	0	5	20	21	2	0	7	6	0	46	2	9	0	27	15	27	2	0	0	0	0	6	3	14	0	16	26	7	223	6	2	8	6	k__Fungi	p__Ascomycota	c__unidentified_Ascomycota	o__unidentified_Ascomycota	f__unidentified_Ascomycota	g__unidentified_Ascomycota	s__unidentified_Ascomycota	New.CleanUp.ReferenceOTU12200
OTU6479	36	6	0	51	1	1	2	8	0	0	0	0	27	0	35	0	0	0	2	6	0	0	0	0	0	0	0	0	0	0	0	0	0	0	0	234	k__Fungi	p__Ascomycota	c__unidentified_Ascomycota	o__unidentified_Ascomycota	f__unidentified_Ascomycota	g__unidentified_Ascomycota	s__unidentified_Ascomycota	New.CleanUp.ReferenceOTU31841
OTU6554	0	1	13	60	0	0	0	0	0	0	0	0	0	166	0	4	5	14	9	6	0	0	0	0	5	37	8	23	11	6	6	14	0	0	0	0	k__Fungi	p__Ascomycota	c__unidentified_Ascomycota	o__unidentified_Ascomycota	f__unidentified_Ascomycota	g__unidentified_Ascomycota	s__unidentified_Ascomycota	SH030594.07FU_FR667224_refs
OTU6506	11	1	42	0	0	0	0	1	0	0	0	4	128	54	60	31	6	11	12	23	0	0	0	0	0	0	0	0	0	0	0	0	0	0	0	0	k__Fungi	p__Ascomycota	c__unidentified_Ascomycota	o__unidentified_Ascomycota	f__unidentified_Ascomycota	g__unidentified_Ascomycota	s__unidentified_Ascomycota	New.ReferenceOTU254
OTU6450	3	0	120	0	0	2	10	0	3	0	2	31	43	23	3	2	7	4	15	16	0	0	8	9	6	4	1	0	36	2	0	1	0	0	0	0	k__Fungi	p__Ascomycota	c__unidentified_Ascomycota	o__unidentified_Ascomycota	f__unidentified_Ascomycota	g__unidentified_Ascomycota	s__unidentified_Ascomycota	SH490663.07FU_HG937104_reps_singleton
OTU6438	8	7	0	16	3	21	68	6	0	2	2	6	43	32	2	0	3	46	7	3	0	4	0	0	6	1	0	0	4	4	1	1	50	0	0	1	k__Fungi	p__Ascomycota	c__unidentified_Ascomycota	o__unidentified_Ascomycota	f__unidentified_Ascomycota	g__unidentified_Ascomycota	s__unidentified_Ascomycota	New.ReferenceOTU71
OTU6546	0	0	65	7	0	3	16	2	17	0	0	6	0	1	31	79	0	0	10	1	0	0	0	56	0	4	0	0	5	0	0	11	0	0	0	0	k__Fungi	p__Ascomycota	c__unidentified_Ascomycota	o__unidentified_Ascomycota	f__unidentified_Ascomycota	g__unidentified_Ascomycota	s__unidentified_Ascomycota	New.ReferenceOTU248
OTU6466	6	2	31	1	0	1	0	0	0	0	0	0	15	93	7	132	0	1	14	3	0	0	0	0	2	0	0	0	0	0	0	0	0	0	0	0	k__Fungi	p__Ascomycota	c__unidentified_Ascomycota	o__unidentified_Ascomycota	f__unidentified_Ascomycota	g__unidentified_Ascomycota	s__unidentified_Ascomycota	SH024551.07FU_EU520619_reps
OTU6719	0	0	23	4	0	0	0	5	0	0	0	0	27	180	1	38	0	0	0	9	0	0	0	0	1	0	0	0	0	10	0	2	0	0	0	0	k__Fungi	p__Ascomycota	c__unidentified_Ascomycota	o__unidentified_Ascomycota	f__unidentified_Ascomycota	g__unidentified_Ascomycota	s__unidentified_Ascomycota	New.ReferenceOTU371
OTU6351	0	0	13	0	0	7	3	1	0	0	0	0	0	0	0	0	5	8	0	0	0	0	0	0	12	54	8	4	23	16	109	11	0	0	3	0	k__Fungi	p__Ascomycota	c__unidentified_Ascomycota	o__unidentified_Ascomycota	f__unidentified_Ascomycota	g__unidentified_Ascomycota	s__unidentified_Ascomycota	SH006034.07FU_JN104527_reps
OTU6321	0	0	21	0	0	39	179	0	0	0	0	0	5	5	0	13	4	0	0	0	0	0	0	0	0	0	0	0	0	0	0	0	0	0	0	0	k__Fungi	p__Ascomycota	c__unidentified_Ascomycota	o__unidentified_Ascomycota	f__unidentified_Ascomycota	g__unidentified_Ascomycota	s__unidentified_Ascomycota	New.CleanUp.ReferenceOTU93832
OTU6434	0	0	0	0	1	1	1	0	0	14	0	0	30	0	0	0	7	3	14	0	0	0	0	0	0	0	0	0	0	0	0	0	27	53	63	18	k__Fungi	p__Ascomycota	c__unidentified_Ascomycota	o__unidentified_Ascomycota	f__unidentified_Ascomycota	g__unidentified_Ascomycota	s__unidentified_Ascomycota	New.CleanUp.ReferenceOTU36056
OTU6289	2	5	1	4	13	0	0	1	0	0	0	0	11	0	1	0	1	35	1	4	0	0	0	1	11	17	9	16	63	9	6	15	0	0	0	1	k__Fungi	p__Ascomycota	c__unidentified_Ascomycota	o__unidentified_Ascomycota	f__unidentified_Ascomycota	g__unidentified_Ascomycota	s__unidentified_Ascomycota	New.ReferenceOTU857
OTU6288	0	0	0	0	42	5	2	5	22	17	43	11	0	0	0	0	0	0	2	0	0	0	12	0	0	0	0	0	0	0	0	0	41	0	19	4	k__Fungi	p__Ascomycota	c__unidentified_Ascomycota	o__unidentified_Ascomycota	f__unidentified_Ascomycota	g__unidentified_Ascomycota	s__unidentified_Ascomycota	SH019172.07FU_HQ260260_reps_singleton
OTU6246	0	0	0	0	0	0	0	67	23	75	8	0	0	0	0	0	0	0	0	0	18	15	0	0	0	0	0	0	0	0	0	0	0	0	0	0	k__Fungi	p__Ascomycota	c__unidentified_Ascomycota	o__unidentified_Ascomycota	f__unidentified_Ascomycota	g__unidentified_Ascomycota	s__unidentified_Ascomycota	New.CleanUp.ReferenceOTU56795
OTU6239	26	0	0	0	1	0	0	8	0	0	0	0	14	105	24	10	0	0	0	14	0	0	0	2	0	0	0	0	0	0	0	0	0	0	0	0	k__Fungi	p__Ascomycota	c__unidentified_Ascomycota	o__unidentified_Ascomycota	f__unidentified_Ascomycota	g__unidentified_Ascomycota	s__unidentified_Ascomycota	New.ReferenceOTU418
OTU6147	172	7	0	0	0	0	0	0	0	0	0	0	0	0	0	0	0	0	0	0	0	0	0	0	0	0	0	0	0	0	0	0	0	0	0	0	k__Fungi	p__Ascomycota	c__unidentified_Ascomycota	o__unidentified_Ascomycota	f__unidentified_Ascomycota	g__unidentified_Ascomycota	s__unidentified_Ascomycota	SH016530.07FU_GQ219875_reps_singleton
OTU6175	6	0	24	0	0	0	0	0	0	0	0	5	0	21	10	0	0	8	3	0	0	0	0	0	0	10	1	6	3	13	1	14	0	0	16	32	k__Fungi	p__Ascomycota	c__unidentified_Ascomycota	o__unidentified_Ascomycota	f__unidentified_Ascomycota	g__unidentified_Ascomycota	s__unidentified_Ascomycota	SH006557.07FU_AY969434_reps_singleton
OTU6113	12	4	5	8	1	2	13	5	0	6	8	14	52	0	1	5	0	4	0	2	1	7	0	0	0	0	0	0	0	0	0	0	0	0	0	0	k__Fungi	p__Ascomycota	c__unidentified_Ascomycota	o__unidentified_Ascomycota	f__unidentified_Ascomycota	g__unidentified_Ascomycota	s__unidentified_Ascomycota	New.CleanUp.ReferenceOTU26719
OTU6078	0	0	0	0	0	0	0	0	0	0	0	0	0	0	0	0	1	0	0	0	0	0	0	0	41	2	3	0	70	5	3	22	0	0	0	0	k__Fungi	p__Ascomycota	c__unidentified_Ascomycota	o__unidentified_Ascomycota	f__unidentified_Ascomycota	g__unidentified_Ascomycota	s__unidentified_Ascomycota	New.CleanUp.ReferenceOTU41239
OTU6132	0	3	14	0	0	3	0	2	0	0	0	0	16	0	4	0	0	0	0	12	0	0	0	0	6	8	5	2	19	5	2	38	1	0	0	2	k__Fungi	p__Ascomycota	c__unidentified_Ascomycota	o__unidentified_Ascomycota	f__unidentified_Ascomycota	g__unidentified_Ascomycota	s__unidentified_Ascomycota	SH014323.07FU_HM488478_reps
OTU6322	0	0	0	0	0	0	0	0	0	0	0	0	0	0	0	0	0	0	0	0	0	0	0	133	0	0	0	0	0	0	0	0	0	0	0	0	k__Fungi	p__Ascomycota	c__unidentified_Ascomycota	o__unidentified_Ascomycota	f__unidentified_Ascomycota	g__unidentified_Ascomycota	s__unidentified_Ascomycota	SH495094.07FU_HG937144_reps_singleton
OTU6005	0	0	0	0	0	0	0	0	0	0	0	31	0	0	0	0	0	0	0	0	90	0	8	0	0	0	0	0	0	0	0	0	0	0	0	0	k__Fungi	p__Ascomycota	c__unidentified_Ascomycota	o__unidentified_Ascomycota	f__unidentified_Ascomycota	g__unidentified_Ascomycota	s__unidentified_Ascomycota	New.CleanUp.ReferenceOTU103888
OTU6083	1	0	2	0	0	0	0	0	0	0	4	3	1	4	12	4	2	1	0	0	4	3	6	0	1	0	2	2	0	0	15	25	17	3	7	9	k__Fungi	p__Ascomycota	c__unidentified_Ascomycota	o__unidentified_Ascomycota	f__unidentified_Ascomycota	g__unidentified_Ascomycota	s__unidentified_Ascomycota	SH030698.07FU_KF572477_reps_singleton
OTU6001	0	0	0	0	0	1	116	0	0	0	0	0	0	0	0	0	0	2	0	0	0	0	0	0	1	0	1	1	3	0	2	0	0	0	0	0	k__Fungi	p__Ascomycota	c__unidentified_Ascomycota	o__unidentified_Ascomycota	f__unidentified_Ascomycota	g__unidentified_Ascomycota	s__unidentified_Ascomycota	New.CleanUp.ReferenceOTU9735
OTU5975	2	0	2	0	12	7	0	2	2	22	19	12	6	0	0	0	1	6	0	0	0	0	1	0	0	0	0	0	0	0	0	0	2	5	2	11	k__Fungi	p__Ascomycota	c__unidentified_Ascomycota	o__unidentified_Ascomycota	f__unidentified_Ascomycota	g__unidentified_Ascomycota	s__unidentified_Ascomycota	New.CleanUp.ReferenceOTU577
OTU5943	0	0	0	0	0	0	0	0	0	0	0	0	14	0	0	86	0	0	0	1	0	0	0	0	0	0	0	0	0	0	0	0	1	0	0	0	k__Fungi	p__Ascomycota	c__unidentified_Ascomycota	o__unidentified_Ascomycota	f__unidentified_Ascomycota	g__unidentified_Ascomycota	s__unidentified_Ascomycota	New.CleanUp.ReferenceOTU53886
OTU5850	0	2	0	5	16	1	3	9	4	2	0	11	23	0	0	0	0	3	0	0	3	5	0	0	0	1	0	0	0	0	0	0	0	0	0	0	k__Fungi	p__Ascomycota	c__unidentified_Ascomycota	o__unidentified_Ascomycota	f__unidentified_Ascomycota	g__unidentified_Ascomycota	s__unidentified_Ascomycota	SH019130.07FU_KC966138_reps
OTU5829	0	0	0	0	0	0	0	0	0	0	0	0	0	0	0	0	0	0	0	0	0	0	0	0	0	1	2	0	0	10	56	17	0	0	0	0	k__Fungi	p__Ascomycota	c__unidentified_Ascomycota	o__unidentified_Ascomycota	f__unidentified_Ascomycota	g__unidentified_Ascomycota	s__unidentified_Ascomycota	New.CleanUp.ReferenceOTU1186
OTU5879	0	0	0	0	0	0	0	0	0	0	0	0	0	0	0	0	0	0	0	0	0	0	0	0	8	7	0	7	4	8	8	10	0	28	5	0	k__Fungi	p__Ascomycota	c__unidentified_Ascomycota	o__unidentified_Ascomycota	f__unidentified_Ascomycota	g__unidentified_Ascomycota	s__unidentified_Ascomycota	New.CleanUp.ReferenceOTU37097
OTU5974	0	1	1	0	0	1	0	0	0	0	17	12	0	0	0	0	0	1	0	0	0	0	0	0	0	6	3	6	1	0	17	16	0	0	0	0	k__Fungi	p__Ascomycota	c__unidentified_Ascomycota	o__unidentified_Ascomycota	f__unidentified_Ascomycota	g__unidentified_Ascomycota	s__unidentified_Ascomycota	New.ReferenceOTU264
OTU5775	0	0	22	0	0	2	34	6	3	0	0	0	0	0	0	0	0	1	0	0	3	0	0	0	0	0	0	0	0	0	0	0	0	0	0	0	k__Fungi	p__Ascomycota	c__unidentified_Ascomycota	o__unidentified_Ascomycota	f__unidentified_Ascomycota	g__unidentified_Ascomycota	s__unidentified_Ascomycota	New.CleanUp.ReferenceOTU65355
OTU5722	0	0	0	0	0	0	0	2	0	0	0	0	0	0	0	0	2	0	21	4	4	0	0	0	4	0	6	1	15	5	1	1	0	0	0	0	k__Fungi	p__Ascomycota	c__unidentified_Ascomycota	o__unidentified_Ascomycota	f__unidentified_Ascomycota	g__unidentified_Ascomycota	s__unidentified_Ascomycota	SH022664.07FU_GQ219942_reps_singleton
OTU5822	0	0	23	5	0	0	0	0	0	0	0	2	9	0	0	0	3	1	0	6	0	0	0	0	3	4	1	1	1	0	0	4	0	0	0	0	k__Fungi	p__Ascomycota	c__unidentified_Ascomycota	o__unidentified_Ascomycota	f__unidentified_Ascomycota	g__unidentified_Ascomycota	s__unidentified_Ascomycota	New.CleanUp.ReferenceOTU42837
OTU5560	0	0	0	0	0	0	0	0	0	0	0	0	0	0	0	0	0	0	0	0	0	0	0	0	0	0	0	0	0	0	54	0	0	0	0	0	k__Fungi	p__Ascomycota	c__unidentified_Ascomycota	o__unidentified_Ascomycota	f__unidentified_Ascomycota	g__unidentified_Ascomycota	s__unidentified_Ascomycota	New.CleanUp.ReferenceOTU13414
OTU5707	0	0	0	0	0	0	0	0	0	0	0	0	0	0	46	1	0	0	7	0	0	0	0	0	0	0	0	0	0	0	0	0	0	0	0	0	k__Fungi	p__Ascomycota	c__unidentified_Ascomycota	o__unidentified_Ascomycota	f__unidentified_Ascomycota	g__unidentified_Ascomycota	s__unidentified_Ascomycota	New.CleanUp.ReferenceOTU71205
OTU5547	0	1	0	0	0	0	9	3	1	3	2	2	0	0	0	0	0	0	0	0	0	21	10	0	0	0	0	0	0	0	0	0	0	0	0	0	k__Fungi	p__Ascomycota	c__unidentified_Ascomycota	o__unidentified_Ascomycota	f__unidentified_Ascomycota	g__unidentified_Ascomycota	s__unidentified_Ascomycota	New.CleanUp.ReferenceOTU37088
OTU5557	0	0	0	0	0	0	0	0	0	0	0	0	0	0	0	0	0	0	0	0	0	0	0	0	2	7	1	0	15	1	0	24	0	0	0	2	k__Fungi	p__Ascomycota	c__unidentified_Ascomycota	o__unidentified_Ascomycota	f__unidentified_Ascomycota	g__unidentified_Ascomycota	s__unidentified_Ascomycota	SH029957.07FU_EU437432_reps
OTU5715	0	0	2	3	0	1	12	1	1	0	0	0	0	0	0	0	0	10	5	0	0	0	0	0	7	0	0	0	4	1	0	2	0	0	0	1	k__Fungi	p__Ascomycota	c__unidentified_Ascomycota	o__unidentified_Ascomycota	f__unidentified_Ascomycota	g__unidentified_Ascomycota	s__unidentified_Ascomycota	New.CleanUp.ReferenceOTU43314
OTU5480	0	0	0	0	0	0	0	0	0	0	0	0	0	2	0	6	0	0	0	1	0	0	0	0	14	10	0	4	5	5	0	1	0	0	0	0	k__Fungi	p__Ascomycota	c__unidentified_Ascomycota	o__unidentified_Ascomycota	f__unidentified_Ascomycota	g__unidentified_Ascomycota	s__unidentified_Ascomycota	SH028598.07FU_JQ857040_reps
OTU5468	0	0	0	0	0	1	0	0	0	0	0	0	0	0	0	0	0	0	0	0	0	0	0	0	2	0	4	0	1	1	37	1	0	0	0	0	k__Fungi	p__Ascomycota	c__unidentified_Ascomycota	o__unidentified_Ascomycota	f__unidentified_Ascomycota	g__unidentified_Ascomycota	s__unidentified_Ascomycota	SH028595.07FU_JX270429_reps
OTU5458	0	0	0	0	0	0	0	0	0	0	0	0	0	0	0	0	0	0	0	0	0	0	0	0	0	45	1	0	0	0	0	0	0	0	0	0	k__Fungi	p__Ascomycota	c__unidentified_Ascomycota	o__unidentified_Ascomycota	f__unidentified_Ascomycota	g__unidentified_Ascomycota	s__unidentified_Ascomycota	SH000090.07FU_KF359560_reps
OTU5488	0	0	33	5	0	0	2	0	0	0	0	2	0	0	0	0	0	0	2	0	0	0	0	0	0	0	0	0	0	0	0	0	0	1	0	0	k__Fungi	p__Ascomycota	c__unidentified_Ascomycota	o__unidentified_Ascomycota	f__unidentified_Ascomycota	g__unidentified_Ascomycota	s__unidentified_Ascomycota	New.CleanUp.ReferenceOTU79947
OTU5376	0	0	0	0	0	0	0	0	0	0	0	19	0	0	0	0	0	0	0	0	0	22	0	0	0	0	0	0	0	0	0	0	0	0	0	0	k__Fungi	p__Ascomycota	c__unidentified_Ascomycota	o__unidentified_Ascomycota	f__unidentified_Ascomycota	g__unidentified_Ascomycota	s__unidentified_Ascomycota	New.CleanUp.ReferenceOTU16334
OTU5644	0	0	2	0	0	0	0	6	0	1	0	2	0	0	0	0	0	0	0	0	0	0	0	0	1	2	2	3	0	7	5	8	2	0	0	0	k__Fungi	p__Ascomycota	c__unidentified_Ascomycota	o__unidentified_Ascomycota	f__unidentified_Ascomycota	g__unidentified_Ascomycota	s__unidentified_Ascomycota	SH473989.07FU_AY026939_reps_singleton
OTU5492	0	0	18	0	0	0	10	0	0	0	0	0	0	0	0	0	0	7	0	0	0	0	0	0	0	1	0	4	0	0	0	0	0	0	0	0	k__Fungi	p__Ascomycota	c__unidentified_Ascomycota	o__unidentified_Ascomycota	f__unidentified_Ascomycota	g__unidentified_Ascomycota	s__unidentified_Ascomycota	SH026325.07FU_EU563511_reps_singleton
OTU5322	20	1	0	0	0	0	0	0	0	0	0	0	0	9	2	4	0	0	0	0	0	0	0	0	0	0	0	0	0	0	0	0	0	0	0	0	k__Fungi	p__Ascomycota	c__unidentified_Ascomycota	o__unidentified_Ascomycota	f__unidentified_Ascomycota	g__unidentified_Ascomycota	s__unidentified_Ascomycota	SH019824.07FU_KF280586_reps
OTU5604	0	0	0	0	0	0	5	0	27	0	0	0	0	0	0	0	0	0	0	0	0	0	0	0	0	1	0	2	0	0	0	0	0	0	0	0	k__Fungi	p__Ascomycota	c__unidentified_Ascomycota	o__unidentified_Ascomycota	f__unidentified_Ascomycota	g__unidentified_Ascomycota	s__unidentified_Ascomycota	SH030587.07FU_KC457014_reps
OTU5239	0	0	0	0	0	0	0	0	0	0	0	0	0	0	0	0	0	0	0	0	0	0	0	0	0	0	0	0	0	0	0	0	0	0	29	5	k__Fungi	p__Ascomycota	c__unidentified_Ascomycota	o__unidentified_Ascomycota	f__unidentified_Ascomycota	g__unidentified_Ascomycota	s__unidentified_Ascomycota	New.CleanUp.ReferenceOTU43270
OTU5495	3	0	0	1	0	0	0	0	0	0	0	0	0	0	0	1	0	0	0	0	0	0	0	0	0	0	0	0	0	0	0	9	2	0	13	2	k__Fungi	p__Ascomycota	c__unidentified_Ascomycota	o__unidentified_Ascomycota	f__unidentified_Ascomycota	g__unidentified_Ascomycota	s__unidentified_Ascomycota	New.CleanUp.ReferenceOTU13843
OTU5143	1	0	0	0	0	0	0	0	0	0	0	0	11	14	0	3	0	0	0	0	0	0	0	1	0	0	0	0	0	0	0	0	0	0	0	0	k__Fungi	p__Ascomycota	c__unidentified_Ascomycota	o__unidentified_Ascomycota	f__unidentified_Ascomycota	g__unidentified_Ascomycota	s__unidentified_Ascomycota	SH019822.07FU_AY204596_reps
OTU5219	12	0	0	3	1	5	2	0	0	0	0	0	0	5	0	0	0	0	0	0	0	0	0	0	0	0	0	0	0	0	0	0	0	2	0	0	k__Fungi	p__Ascomycota	c__unidentified_Ascomycota	o__unidentified_Ascomycota	f__unidentified_Ascomycota	g__unidentified_Ascomycota	s__unidentified_Ascomycota	SH026685.07FU_JX042982_reps_singleton
OTU5339	0	0	0	2	0	1	0	0	0	0	0	9	0	0	0	0	0	0	0	0	0	0	0	0	0	0	0	0	0	0	0	3	11	4	0	0	k__Fungi	p__Ascomycota	c__unidentified_Ascomycota	o__unidentified_Ascomycota	f__unidentified_Ascomycota	g__unidentified_Ascomycota	s__unidentified_Ascomycota	SH008322.07FU_HM216213_reps
OTU5065	0	0	0	0	0	0	0	0	0	0	0	0	0	0	0	0	0	0	0	0	0	0	0	0	14	0	3	0	7	1	1	1	0	0	0	0	k__Fungi	p__Ascomycota	c__unidentified_Ascomycota	o__unidentified_Ascomycota	f__unidentified_Ascomycota	g__unidentified_Ascomycota	s__unidentified_Ascomycota	New.ReferenceOTU878
OTU5040	0	0	0	0	0	0	0	0	0	0	0	0	0	0	0	0	0	0	0	0	26	0	0	0	0	0	0	0	0	0	0	0	0	0	0	0	k__Fungi	p__Ascomycota	c__unidentified_Ascomycota	o__unidentified_Ascomycota	f__unidentified_Ascomycota	g__unidentified_Ascomycota	s__unidentified_Ascomycota	New.CleanUp.ReferenceOTU7831
OTU5171	0	0	0	0	0	0	0	0	0	1	4	18	0	0	0	0	0	0	0	0	0	0	0	0	0	0	0	0	0	0	0	0	0	1	1	1	k__Fungi	p__Ascomycota	c__unidentified_Ascomycota	o__unidentified_Ascomycota	f__unidentified_Ascomycota	g__unidentified_Ascomycota	s__unidentified_Ascomycota	New.CleanUp.ReferenceOTU81886
OTU5012	3	0	0	1	0	4	0	0	0	0	0	0	0	0	0	0	0	0	0	11	0	0	0	0	0	0	1	3	0	0	1	0	0	0	0	0	k__Fungi	p__Ascomycota	c__unidentified_Ascomycota	o__unidentified_Ascomycota	f__unidentified_Ascomycota	g__unidentified_Ascomycota	s__unidentified_Ascomycota	New.CleanUp.ReferenceOTU70576
OTU4906	0	0	0	0	0	0	0	0	0	0	21	1	0	0	0	0	0	0	0	0	0	0	0	0	0	0	0	0	0	0	0	0	0	0	0	0	k__Fungi	p__Ascomycota	c__unidentified_Ascomycota	o__unidentified_Ascomycota	f__unidentified_Ascomycota	g__unidentified_Ascomycota	s__unidentified_Ascomycota	New.CleanUp.ReferenceOTU108065
OTU5286	0	0	2	1	0	0	0	0	0	0	0	0	0	10	0	0	0	0	0	0	0	0	0	0	1	3	0	1	2	1	0	1	0	0	0	0	k__Fungi	p__Ascomycota	c__unidentified_Ascomycota	o__unidentified_Ascomycota	f__unidentified_Ascomycota	g__unidentified_Ascomycota	s__unidentified_Ascomycota	New.CleanUp.ReferenceOTU33169
OTU4857	0	0	0	0	0	3	0	0	0	0	2	6	0	0	0	0	0	4	0	0	2	0	0	4	0	0	0	0	0	0	0	0	0	0	0	0	k__Fungi	p__Ascomycota	c__unidentified_Ascomycota	o__unidentified_Ascomycota	f__unidentified_Ascomycota	g__unidentified_Ascomycota	s__unidentified_Ascomycota	SH008228.07FU_GQ411306_refs
OTU5509	0	0	0	0	1	0	0	0	0	0	0	0	0	0	0	0	0	0	0	0	0	0	0	0	0	8	0	0	0	1	1	10	0	0	0	0	k__Fungi	p__Ascomycota	c__unidentified_Ascomycota	o__unidentified_Ascomycota	f__unidentified_Ascomycota	g__unidentified_Ascomycota	s__unidentified_Ascomycota	New.CleanUp.ReferenceOTU111450
OTU4970	0	0	0	0	0	2	0	0	0	0	0	6	0	0	0	0	0	0	0	0	10	0	2	0	0	0	0	0	0	0	0	0	0	0	0	0	k__Fungi	p__Ascomycota	c__unidentified_Ascomycota	o__unidentified_Ascomycota	f__unidentified_Ascomycota	g__unidentified_Ascomycota	s__unidentified_Ascomycota	SH021229.07FU_KP131521_refs
OTU4874	0	0	5	4	0	0	0	0	0	0	0	0	0	1	4	3	0	0	0	2	0	0	0	0	0	0	0	0	0	0	0	0	0	0	0	0	k__Fungi	p__Ascomycota	c__unidentified_Ascomycota	o__unidentified_Ascomycota	f__unidentified_Ascomycota	g__unidentified_Ascomycota	s__unidentified_Ascomycota	New.CleanUp.ReferenceOTU93989
OTU5417	0	0	0	6	0	1	2	1	0	0	0	0	4	0	0	0	0	3	2	0	0	0	0	0	0	0	0	0	0	0	0	0	0	0	0	0	k__Fungi	p__Ascomycota	c__unidentified_Ascomycota	o__unidentified_Ascomycota	f__unidentified_Ascomycota	g__unidentified_Ascomycota	s__unidentified_Ascomycota	New.CleanUp.ReferenceOTU87112
OTU4743	0	0	0	0	0	0	0	0	0	0	15	3	0	0	0	0	0	0	0	0	0	0	0	0	0	0	0	0	0	0	0	0	0	0	0	0	k__Fungi	p__Ascomycota	c__unidentified_Ascomycota	o__unidentified_Ascomycota	f__unidentified_Ascomycota	g__unidentified_Ascomycota	s__unidentified_Ascomycota	SH004617.07FU_HQ211754_reps_singleton
OTU5216	0	0	0	1	0	0	2	0	1	0	0	0	0	0	6	0	0	0	0	0	0	0	0	0	0	0	0	2	0	0	0	3	3	0	0	0	k__Fungi	p__Ascomycota	c__unidentified_Ascomycota	o__unidentified_Ascomycota	f__unidentified_Ascomycota	g__unidentified_Ascomycota	s__unidentified_Ascomycota	SH008140.07FU_KF800556_reps_singleton
OTU4641	0	0	0	0	0	2	1	0	6	2	4	1	0	0	0	0	0	0	0	0	0	0	0	0	0	0	0	0	0	0	0	0	0	0	0	0	k__Fungi	p__Ascomycota	c__unidentified_Ascomycota	o__unidentified_Ascomycota	f__unidentified_Ascomycota	g__unidentified_Ascomycota	s__unidentified_Ascomycota	New.CleanUp.ReferenceOTU35975
OTU4650	0	0	7	1	0	0	0	0	0	0	0	0	0	0	8	0	0	0	0	0	0	0	0	0	0	0	0	0	0	0	0	0	0	0	0	0	k__Fungi	p__Ascomycota	c__unidentified_Ascomycota	o__unidentified_Ascomycota	f__unidentified_Ascomycota	g__unidentified_Ascomycota	s__unidentified_Ascomycota	New.CleanUp.ReferenceOTU93236
OTU4980	0	0	0	0	0	2	1	0	2	0	0	0	4	3	0	0	0	0	1	1	0	0	0	0	0	0	0	0	0	0	1	1	0	0	0	0	k__Fungi	p__Ascomycota	c__unidentified_Ascomycota	o__unidentified_Ascomycota	f__unidentified_Ascomycota	g__unidentified_Ascomycota	s__unidentified_Ascomycota	New.CleanUp.ReferenceOTU112295
OTU4586	0	0	0	5	0	1	0	0	0	0	0	0	3	0	4	0	0	0	0	2	0	0	0	0	0	0	0	0	0	0	0	0	0	0	0	0	k__Fungi	p__Ascomycota	c__unidentified_Ascomycota	o__unidentified_Ascomycota	f__unidentified_Ascomycota	g__unidentified_Ascomycota	s__unidentified_Ascomycota	New.CleanUp.ReferenceOTU17676
OTU4633	0	0	0	0	0	0	0	0	0	0	0	6	0	0	0	0	0	1	0	0	0	0	0	0	0	2	0	0	0	1	2	3	0	0	0	0	k__Fungi	p__Ascomycota	c__unidentified_Ascomycota	o__unidentified_Ascomycota	f__unidentified_Ascomycota	g__unidentified_Ascomycota	s__unidentified_Ascomycota	SH028799.07FU_GU174312_reps
OTU4828	9	0	5	0	0	0	0	0	0	0	0	0	0	0	0	1	0	0	0	0	0	0	0	0	0	0	0	0	0	0	0	0	0	0	0	0	k__Fungi	p__Ascomycota	c__unidentified_Ascomycota	o__unidentified_Ascomycota	f__unidentified_Ascomycota	g__unidentified_Ascomycota	s__unidentified_Ascomycota	New.CleanUp.ReferenceOTU775
OTU4830	0	0	0	0	0	0	0	3	0	0	0	3	0	0	0	0	0	0	0	0	0	0	0	0	0	0	0	0	0	0	0	0	1	5	0	2	k__Fungi	p__Ascomycota	c__unidentified_Ascomycota	o__unidentified_Ascomycota	f__unidentified_Ascomycota	g__unidentified_Ascomycota	s__unidentified_Ascomycota	New.CleanUp.ReferenceOTU9513
OTU4452	0	0	0	0	0	0	0	0	0	0	2	10	0	0	0	0	0	0	0	0	0	0	0	0	0	0	0	0	0	0	0	0	1	0	0	0	k__Fungi	p__Ascomycota	c__unidentified_Ascomycota	o__unidentified_Ascomycota	f__unidentified_Ascomycota	g__unidentified_Ascomycota	s__unidentified_Ascomycota	SH017668.07FU_KC871044_reps
OTU4364	0	0	0	0	0	0	0	0	0	0	0	2	8	0	0	0	0	0	0	0	0	0	0	0	0	0	0	0	0	0	0	0	0	0	2	0	k__Fungi	p__Ascomycota	c__unidentified_Ascomycota	o__unidentified_Ascomycota	f__unidentified_Ascomycota	g__unidentified_Ascomycota	s__unidentified_Ascomycota	SH000314.07FU_GU909516_reps
OTU4384	0	3	0	0	0	0	8	0	0	0	0	0	0	0	0	0	1	0	0	0	0	0	0	0	0	0	0	0	0	0	0	0	0	0	0	0	k__Fungi	p__Ascomycota	c__unidentified_Ascomycota	o__unidentified_Ascomycota	f__unidentified_Ascomycota	g__unidentified_Ascomycota	s__unidentified_Ascomycota	New.CleanUp.ReferenceOTU56261
OTU4286	0	0	0	0	0	0	0	0	0	0	0	0	0	0	0	0	0	0	0	0	0	0	0	0	0	0	0	0	0	0	0	0	0	0	9	2	k__Fungi	p__Ascomycota	c__unidentified_Ascomycota	o__unidentified_Ascomycota	f__unidentified_Ascomycota	g__unidentified_Ascomycota	s__unidentified_Ascomycota	SH006563.07FU_UDB020854_reps_singleton
OTU4295	0	0	0	0	0	0	0	0	0	0	0	0	0	0	0	0	0	0	0	0	0	0	0	0	0	0	0	0	0	0	0	0	0	0	6	5	k__Fungi	p__Ascomycota	c__unidentified_Ascomycota	o__unidentified_Ascomycota	f__unidentified_Ascomycota	g__unidentified_Ascomycota	s__unidentified_Ascomycota	New.CleanUp.ReferenceOTU16247
OTU4307	0	0	0	0	0	0	0	0	0	0	0	0	0	0	0	0	0	0	0	0	0	0	0	11	0	0	0	0	0	0	0	0	0	0	0	0	k__Fungi	p__Ascomycota	c__unidentified_Ascomycota	o__unidentified_Ascomycota	f__unidentified_Ascomycota	g__unidentified_Ascomycota	s__unidentified_Ascomycota	New.CleanUp.ReferenceOTU65581
OTU4460	0	0	0	0	0	1	0	0	0	2	1	0	0	0	0	0	0	0	3	0	0	4	0	0	0	0	0	0	0	0	0	0	0	0	0	0	k__Fungi	p__Ascomycota	c__unidentified_Ascomycota	o__unidentified_Ascomycota	f__unidentified_Ascomycota	g__unidentified_Ascomycota	s__unidentified_Ascomycota	New.ReferenceOTU293
OTU4190	1	0	0	2	0	0	0	0	0	0	0	0	0	2	1	0	0	0	4	0	0	0	0	0	0	0	0	0	0	0	0	0	0	0	0	0	k__Fungi	p__Ascomycota	c__unidentified_Ascomycota	o__unidentified_Ascomycota	f__unidentified_Ascomycota	g__unidentified_Ascomycota	s__unidentified_Ascomycota	New.CleanUp.ReferenceOTU13241
OTU4215	0	0	0	0	0	0	0	0	0	0	0	0	10	0	0	0	0	0	0	0	0	0	0	0	0	0	0	0	0	0	0	0	0	0	0	0	k__Fungi	p__Ascomycota	c__unidentified_Ascomycota	o__unidentified_Ascomycota	f__unidentified_Ascomycota	g__unidentified_Ascomycota	s__unidentified_Ascomycota	New.CleanUp.ReferenceOTU115747
OTU4595	0	0	1	0	0	3	2	0	0	0	0	1	0	0	0	0	0	0	0	0	0	0	0	0	0	0	0	0	0	0	3	0	0	0	0	0	k__Fungi	p__Ascomycota	c__unidentified_Ascomycota	o__unidentified_Ascomycota	f__unidentified_Ascomycota	g__unidentified_Ascomycota	s__unidentified_Ascomycota	New.CleanUp.ReferenceOTU90364
OTU4690	0	0	0	0	0	0	0	0	0	0	0	0	0	0	0	0	0	0	0	0	0	0	0	0	0	0	0	0	0	0	0	0	0	0	10	0	k__Fungi	p__Ascomycota	c__unidentified_Ascomycota	o__unidentified_Ascomycota	f__unidentified_Ascomycota	g__unidentified_Ascomycota	s__unidentified_Ascomycota	SH019901.07FU_GU727562_refs
OTU4114	0	0	0	0	0	0	0	0	0	0	9	0	0	0	0	0	0	0	0	0	0	0	0	0	0	0	0	0	0	0	0	0	0	0	0	0	k__Fungi	p__Ascomycota	c__unidentified_Ascomycota	o__unidentified_Ascomycota	f__unidentified_Ascomycota	g__unidentified_Ascomycota	s__unidentified_Ascomycota	New.CleanUp.ReferenceOTU119906
OTU4453	1	0	0	0	0	0	1	0	0	0	0	0	0	1	1	1	0	1	0	0	1	0	1	0	0	0	1	0	0	0	0	0	0	0	0	0	k__Fungi	p__Ascomycota	c__unidentified_Ascomycota	o__unidentified_Ascomycota	f__unidentified_Ascomycota	g__unidentified_Ascomycota	s__unidentified_Ascomycota	SH489650.07FU_HG937149_reps_singleton
OTU3938	0	0	8	0	0	0	0	0	0	0	0	0	0	0	0	0	0	0	0	0	0	0	0	0	0	0	0	0	0	0	0	0	0	0	0	0	k__Fungi	p__Ascomycota	c__unidentified_Ascomycota	o__unidentified_Ascomycota	f__unidentified_Ascomycota	g__unidentified_Ascomycota	s__unidentified_Ascomycota	SH010352.07FU_HQ850135_reps_singleton
OTU3943	0	0	0	0	0	0	1	0	0	0	0	7	0	0	0	0	0	0	0	0	0	0	0	0	0	0	0	0	0	0	0	0	0	0	0	0	k__Fungi	p__Ascomycota	c__unidentified_Ascomycota	o__unidentified_Ascomycota	f__unidentified_Ascomycota	g__unidentified_Ascomycota	s__unidentified_Ascomycota	New.CleanUp.ReferenceOTU5977
OTU3952	0	0	0	0	0	0	0	0	0	0	0	0	0	2	2	4	0	0	0	0	0	0	0	0	0	0	0	0	0	0	0	0	0	0	0	0	k__Fungi	p__Ascomycota	c__unidentified_Ascomycota	o__unidentified_Ascomycota	f__unidentified_Ascomycota	g__unidentified_Ascomycota	s__unidentified_Ascomycota	New.CleanUp.ReferenceOTU22861
OTU3967	0	0	0	0	0	0	0	0	0	0	5	3	0	0	0	0	0	0	0	0	0	0	0	0	0	0	0	0	0	0	0	0	0	0	0	0	k__Fungi	p__Ascomycota	c__unidentified_Ascomycota	o__unidentified_Ascomycota	f__unidentified_Ascomycota	g__unidentified_Ascomycota	s__unidentified_Ascomycota	New.CleanUp.ReferenceOTU68973
OTU4366	0	0	0	0	0	0	0	0	0	0	0	0	0	0	0	0	0	0	0	0	0	0	0	0	0	0	0	1	0	0	6	1	0	0	0	0	k__Fungi	p__Ascomycota	c__unidentified_Ascomycota	o__unidentified_Ascomycota	f__unidentified_Ascomycota	g__unidentified_Ascomycota	s__unidentified_Ascomycota	SH025374.07FU_KF874620_refs
OTU3790	1	0	4	0	0	2	0	0	0	0	0	0	0	0	0	0	0	0	0	0	0	0	0	0	0	0	0	0	0	0	0	0	0	0	0	0	k__Fungi	p__Ascomycota	c__unidentified_Ascomycota	o__unidentified_Ascomycota	f__unidentified_Ascomycota	g__unidentified_Ascomycota	s__unidentified_Ascomycota	New.CleanUp.ReferenceOTU22645
OTU3799	1	0	0	0	0	0	0	0	0	0	0	0	4	0	1	0	1	0	0	0	0	0	0	0	0	0	0	0	0	0	0	0	0	0	0	0	k__Fungi	p__Ascomycota	c__unidentified_Ascomycota	o__unidentified_Ascomycota	f__unidentified_Ascomycota	g__unidentified_Ascomycota	s__unidentified_Ascomycota	New.CleanUp.ReferenceOTU62460
OTU3927	0	0	0	0	0	0	0	3	0	0	0	1	0	0	0	0	0	0	3	0	0	0	0	0	0	0	0	0	0	0	0	0	0	0	0	0	k__Fungi	p__Ascomycota	c__unidentified_Ascomycota	o__unidentified_Ascomycota	f__unidentified_Ascomycota	g__unidentified_Ascomycota	s__unidentified_Ascomycota	SH028593.07FU_AY129291_refs
OTU4392	0	0	0	0	0	0	0	0	0	3	4	0	0	0	0	0	0	0	0	0	0	0	0	0	0	0	0	0	0	0	0	0	0	0	0	0	k__Fungi	p__Ascomycota	c__unidentified_Ascomycota	o__unidentified_Ascomycota	f__unidentified_Ascomycota	g__unidentified_Ascomycota	s__unidentified_Ascomycota	New.CleanUp.ReferenceOTU83568
OTU4591	0	0	0	0	0	0	0	0	0	0	0	0	0	0	0	0	0	0	0	7	0	0	0	0	0	0	0	0	0	0	0	0	0	0	0	0	k__Fungi	p__Ascomycota	c__unidentified_Ascomycota	o__unidentified_Ascomycota	f__unidentified_Ascomycota	g__unidentified_Ascomycota	s__unidentified_Ascomycota	New.CleanUp.ReferenceOTU64836
OTU4695	0	0	3	0	0	0	4	0	0	0	0	0	0	0	0	0	0	0	0	0	0	0	0	0	0	0	0	0	0	0	0	0	0	0	0	0	k__Fungi	p__Ascomycota	c__unidentified_Ascomycota	o__unidentified_Ascomycota	f__unidentified_Ascomycota	g__unidentified_Ascomycota	s__unidentified_Ascomycota	New.CleanUp.ReferenceOTU12215
OTU3618	0	0	0	0	0	0	0	0	0	0	0	0	0	0	6	0	0	0	0	0	0	0	0	0	0	0	0	0	0	0	0	0	0	0	0	0	k__Fungi	p__Ascomycota	c__unidentified_Ascomycota	o__unidentified_Ascomycota	f__unidentified_Ascomycota	g__unidentified_Ascomycota	s__unidentified_Ascomycota	New.CleanUp.ReferenceOTU53405
OTU3632	0	0	0	0	0	0	0	0	0	0	0	0	0	0	0	0	0	0	0	0	0	0	0	0	0	0	0	0	0	0	0	0	6	0	0	0	k__Fungi	p__Ascomycota	c__unidentified_Ascomycota	o__unidentified_Ascomycota	f__unidentified_Ascomycota	g__unidentified_Ascomycota	s__unidentified_Ascomycota	New.CleanUp.ReferenceOTU76758
OTU3652	0	0	0	0	0	0	0	0	0	0	6	0	0	0	0	0	0	0	0	0	0	0	0	0	0	0	0	0	0	0	0	0	0	0	0	0	k__Fungi	p__Ascomycota	c__unidentified_Ascomycota	o__unidentified_Ascomycota	f__unidentified_Ascomycota	g__unidentified_Ascomycota	s__unidentified_Ascomycota	New.CleanUp.ReferenceOTU119892
OTU3809	0	0	1	0	0	1	0	0	0	0	0	0	0	0	0	2	0	0	0	0	0	0	0	0	0	0	0	1	1	0	0	0	0	0	0	0	k__Fungi	p__Ascomycota	c__unidentified_Ascomycota	o__unidentified_Ascomycota	f__unidentified_Ascomycota	g__unidentified_Ascomycota	s__unidentified_Ascomycota	New.CleanUp.ReferenceOTU82419
OTU4177	2	0	0	0	0	0	0	0	0	0	0	0	0	0	0	4	0	0	0	0	0	0	0	0	0	0	0	0	0	0	0	0	0	0	0	0	k__Fungi	p__Ascomycota	c__unidentified_Ascomycota	o__unidentified_Ascomycota	f__unidentified_Ascomycota	g__unidentified_Ascomycota	s__unidentified_Ascomycota	SH022602.07FU_EU552162_reps
OTU3373	0	0	0	5	0	0	0	0	0	0	0	0	0	0	0	0	0	0	0	0	0	0	0	0	0	0	0	0	0	0	0	0	0	0	0	0	k__Fungi	p__Ascomycota	c__unidentified_Ascomycota	o__unidentified_Ascomycota	f__unidentified_Ascomycota	g__unidentified_Ascomycota	s__unidentified_Ascomycota	New.CleanUp.ReferenceOTU18841
OTU3381	0	0	0	0	0	0	0	0	0	0	0	0	0	4	0	1	0	0	0	0	0	0	0	0	0	0	0	0	0	0	0	0	0	0	0	0	k__Fungi	p__Ascomycota	c__unidentified_Ascomycota	o__unidentified_Ascomycota	f__unidentified_Ascomycota	g__unidentified_Ascomycota	s__unidentified_Ascomycota	New.CleanUp.ReferenceOTU28870
OTU3413	0	0	0	0	0	0	0	1	0	0	0	0	0	0	0	0	0	0	0	0	2	0	0	2	0	0	0	0	0	0	0	0	0	0	0	0	k__Fungi	p__Ascomycota	c__unidentified_Ascomycota	o__unidentified_Ascomycota	f__unidentified_Ascomycota	g__unidentified_Ascomycota	s__unidentified_Ascomycota	New.CleanUp.ReferenceOTU77059
OTU3418	0	0	0	0	0	0	0	0	0	0	0	0	0	0	0	0	0	0	0	0	0	0	0	0	0	2	0	0	0	2	1	0	0	0	0	0	k__Fungi	p__Ascomycota	c__unidentified_Ascomycota	o__unidentified_Ascomycota	f__unidentified_Ascomycota	g__unidentified_Ascomycota	s__unidentified_Ascomycota	New.CleanUp.ReferenceOTU84552
OTU3614	0	0	0	0	0	0	0	0	0	0	0	0	0	0	4	0	0	0	0	0	0	0	0	0	0	1	0	0	0	0	0	0	0	0	0	0	k__Fungi	p__Ascomycota	c__unidentified_Ascomycota	o__unidentified_Ascomycota	f__unidentified_Ascomycota	g__unidentified_Ascomycota	s__unidentified_Ascomycota	New.CleanUp.ReferenceOTU32075
OTU2965	0	0	0	0	0	0	0	0	0	0	0	0	0	0	0	0	0	0	0	4	0	0	0	0	0	0	0	0	0	0	0	0	0	0	0	0	k__Fungi	p__Ascomycota	c__unidentified_Ascomycota	o__unidentified_Ascomycota	f__unidentified_Ascomycota	g__unidentified_Ascomycota	s__unidentified_Ascomycota	SH027433.07FU_HQ914945_reps
OTU2972	4	0	0	0	0	0	0	0	0	0	0	0	0	0	0	0	0	0	0	0	0	0	0	0	0	0	0	0	0	0	0	0	0	0	0	0	k__Fungi	p__Ascomycota	c__unidentified_Ascomycota	o__unidentified_Ascomycota	f__unidentified_Ascomycota	g__unidentified_Ascomycota	s__unidentified_Ascomycota	SH025331.07FU_GQ120985_reps
OTU3030	0	0	0	0	0	0	0	0	0	0	0	0	0	0	0	0	0	0	0	0	0	0	0	0	0	0	0	1	0	0	0	2	0	0	1	0	k__Fungi	p__Ascomycota	c__unidentified_Ascomycota	o__unidentified_Ascomycota	f__unidentified_Ascomycota	g__unidentified_Ascomycota	s__unidentified_Ascomycota	New.CleanUp.ReferenceOTU21262
OTU3036	0	0	0	0	0	0	0	0	0	0	0	0	0	0	0	0	0	0	0	0	0	0	0	0	0	0	1	0	1	1	0	1	0	0	0	0	k__Fungi	p__Ascomycota	c__unidentified_Ascomycota	o__unidentified_Ascomycota	f__unidentified_Ascomycota	g__unidentified_Ascomycota	s__unidentified_Ascomycota	New.CleanUp.ReferenceOTU25171
OTU3040	0	0	0	4	0	0	0	0	0	0	0	0	0	0	0	0	0	0	0	0	0	0	0	0	0	0	0	0	0	0	0	0	0	0	0	0	k__Fungi	p__Ascomycota	c__unidentified_Ascomycota	o__unidentified_Ascomycota	f__unidentified_Ascomycota	g__unidentified_Ascomycota	s__unidentified_Ascomycota	New.CleanUp.ReferenceOTU28699
OTU3048	0	0	0	0	0	0	4	0	0	0	0	0	0	0	0	0	0	0	0	0	0	0	0	0	0	0	0	0	0	0	0	0	0	0	0	0	k__Fungi	p__Ascomycota	c__unidentified_Ascomycota	o__unidentified_Ascomycota	f__unidentified_Ascomycota	g__unidentified_Ascomycota	s__unidentified_Ascomycota	New.CleanUp.ReferenceOTU34999
OTU3808	0	0	0	0	0	0	0	0	0	0	0	0	0	0	0	0	4	0	0	0	0	0	0	0	0	0	0	0	0	0	0	0	0	0	0	0	k__Fungi	p__Ascomycota	c__unidentified_Ascomycota	o__unidentified_Ascomycota	f__unidentified_Ascomycota	g__unidentified_Ascomycota	s__unidentified_Ascomycota	New.CleanUp.ReferenceOTU81936
OTU4386	0	0	0	0	0	2	0	0	0	0	0	0	0	0	0	0	0	2	0	0	0	0	0	0	0	0	0	0	0	0	0	0	0	0	0	0	k__Fungi	p__Ascomycota	c__unidentified_Ascomycota	o__unidentified_Ascomycota	f__unidentified_Ascomycota	g__unidentified_Ascomycota	s__unidentified_Ascomycota	New.CleanUp.ReferenceOTU56837
OTU4465	0	0	0	0	0	0	0	0	0	0	0	4	0	0	0	0	0	0	0	0	0	0	0	0	0	0	0	0	0	0	0	0	0	0	0	0	k__Fungi	p__Ascomycota	c__unidentified_Ascomycota	o__unidentified_Ascomycota	f__unidentified_Ascomycota	g__unidentified_Ascomycota	s__unidentified_Ascomycota	New.CleanUp.ReferenceOTU37592
OTU2417	0	0	0	0	0	0	0	0	0	0	0	3	0	0	0	0	0	0	0	0	0	0	0	0	0	0	0	0	0	0	0	0	0	0	0	0	k__Fungi	p__Ascomycota	c__unidentified_Ascomycota	o__unidentified_Ascomycota	f__unidentified_Ascomycota	g__unidentified_Ascomycota	s__unidentified_Ascomycota	SH489523.07FU_KU535754_reps_singleton
OTU2432	0	0	0	0	0	0	0	0	0	0	0	0	0	0	0	0	0	0	0	0	0	0	0	3	0	0	0	0	0	0	0	0	0	0	0	0	k__Fungi	p__Ascomycota	c__unidentified_Ascomycota	o__unidentified_Ascomycota	f__unidentified_Ascomycota	g__unidentified_Ascomycota	s__unidentified_Ascomycota	SH005188.07FU_GU327419_reps
OTU2481	0	0	0	0	0	0	0	0	0	3	0	0	0	0	0	0	0	0	0	0	0	0	0	0	0	0	0	0	0	0	0	0	0	0	0	0	k__Fungi	p__Ascomycota	c__unidentified_Ascomycota	o__unidentified_Ascomycota	f__unidentified_Ascomycota	g__unidentified_Ascomycota	s__unidentified_Ascomycota	New.CleanUp.ReferenceOTU7354
OTU2494	0	0	0	0	0	0	0	0	0	0	0	0	0	0	3	0	0	0	0	0	0	0	0	0	0	0	0	0	0	0	0	0	0	0	0	0	k__Fungi	p__Ascomycota	c__unidentified_Ascomycota	o__unidentified_Ascomycota	f__unidentified_Ascomycota	g__unidentified_Ascomycota	s__unidentified_Ascomycota	New.CleanUp.ReferenceOTU16173
OTU2513	0	0	0	0	0	0	0	0	0	1	0	0	0	0	0	0	0	0	0	0	0	0	0	0	0	0	0	0	0	0	0	0	0	2	0	0	k__Fungi	p__Ascomycota	c__unidentified_Ascomycota	o__unidentified_Ascomycota	f__unidentified_Ascomycota	g__unidentified_Ascomycota	s__unidentified_Ascomycota	New.CleanUp.ReferenceOTU26650
OTU2602	0	0	0	0	0	0	1	0	0	0	0	0	0	0	0	0	0	2	0	0	0	0	0	0	0	0	0	0	0	0	0	0	0	0	0	0	k__Fungi	p__Ascomycota	c__unidentified_Ascomycota	o__unidentified_Ascomycota	f__unidentified_Ascomycota	g__unidentified_Ascomycota	s__unidentified_Ascomycota	New.CleanUp.ReferenceOTU90952
OTU2615	0	0	0	0	0	0	0	0	0	0	0	3	0	0	0	0	0	0	0	0	0	0	0	0	0	0	0	0	0	0	0	0	0	0	0	0	k__Fungi	p__Ascomycota	c__unidentified_Ascomycota	o__unidentified_Ascomycota	f__unidentified_Ascomycota	g__unidentified_Ascomycota	s__unidentified_Ascomycota	New.CleanUp.ReferenceOTU102014
OTU2638	0	0	0	0	0	0	3	0	0	0	0	0	0	0	0	0	0	0	0	0	0	0	0	0	0	0	0	0	0	0	0	0	0	0	0	0	k__Fungi	p__Ascomycota	c__unidentified_Ascomycota	o__unidentified_Ascomycota	f__unidentified_Ascomycota	g__unidentified_Ascomycota	s__unidentified_Ascomycota	New.CleanUp.ReferenceOTU116822
OTU3052	0	0	0	0	0	0	0	0	0	0	0	0	0	0	0	0	0	0	0	0	0	0	0	0	0	1	0	1	0	0	1	0	0	0	0	0	k__Fungi	p__Ascomycota	c__unidentified_Ascomycota	o__unidentified_Ascomycota	f__unidentified_Ascomycota	g__unidentified_Ascomycota	s__unidentified_Ascomycota	New.CleanUp.ReferenceOTU39537
OTU4092	0	0	0	0	0	0	0	0	2	0	0	0	0	0	0	0	0	0	0	0	1	0	0	0	0	0	0	0	0	0	0	0	0	0	0	0	k__Fungi	p__Ascomycota	c__unidentified_Ascomycota	o__unidentified_Ascomycota	f__unidentified_Ascomycota	g__unidentified_Ascomycota	s__unidentified_Ascomycota	New.CleanUp.ReferenceOTU39446
OTU1183	0	0	0	0	0	0	0	0	0	0	0	0	0	0	0	0	2	0	0	0	0	0	0	0	0	0	0	0	0	0	0	0	0	0	0	0	k__Fungi	p__Ascomycota	c__unidentified_Ascomycota	o__unidentified_Ascomycota	f__unidentified_Ascomycota	g__unidentified_Ascomycota	s__unidentified_Ascomycota	SH008241.07FU_AB520283_reps
OTU1195	0	0	0	0	0	0	0	0	0	0	0	0	0	0	0	0	0	0	0	0	0	0	0	0	0	0	0	0	0	0	0	2	0	0	0	0	k__Fungi	p__Ascomycota	c__unidentified_Ascomycota	o__unidentified_Ascomycota	f__unidentified_Ascomycota	g__unidentified_Ascomycota	s__unidentified_Ascomycota	SH002810.07FU_GQ303268_refs
OTU1199	0	0	2	0	0	0	0	0	0	0	0	0	0	0	0	0	0	0	0	0	0	0	0	0	0	0	0	0	0	0	0	0	0	0	0	0	k__Fungi	p__Ascomycota	c__unidentified_Ascomycota	o__unidentified_Ascomycota	f__unidentified_Ascomycota	g__unidentified_Ascomycota	s__unidentified_Ascomycota	SH002249.07FU_AJ244263_reps_singleton
OTU1200	0	0	0	0	0	0	0	0	0	0	0	0	0	0	0	0	0	0	0	0	0	0	0	0	0	0	2	0	0	0	0	0	0	0	0	0	k__Fungi	p__Ascomycota	c__unidentified_Ascomycota	o__unidentified_Ascomycota	f__unidentified_Ascomycota	g__unidentified_Ascomycota	s__unidentified_Ascomycota	SH006366.07FU_HM239740_reps
OTU1202	0	0	0	0	0	2	0	0	0	0	0	0	0	0	0	0	0	0	0	0	0	0	0	0	0	0	0	0	0	0	0	0	0	0	0	0	k__Fungi	p__Ascomycota	c__unidentified_Ascomycota	o__unidentified_Ascomycota	f__unidentified_Ascomycota	g__unidentified_Ascomycota	s__unidentified_Ascomycota	SH030697.07FU_JQ044425_refs_singleton
OTU1240	0	0	0	0	0	0	0	0	0	0	0	0	0	0	0	0	2	0	0	0	0	0	0	0	0	0	0	0	0	0	0	0	0	0	0	0	k__Fungi	p__Ascomycota	c__unidentified_Ascomycota	o__unidentified_Ascomycota	f__unidentified_Ascomycota	g__unidentified_Ascomycota	s__unidentified_Ascomycota	SH030692.07FU_EU675983_reps
OTU1242	0	0	0	0	0	0	0	0	0	0	0	0	0	0	0	2	0	0	0	0	0	0	0	0	0	0	0	0	0	0	0	0	0	0	0	0	k__Fungi	p__Ascomycota	c__unidentified_Ascomycota	o__unidentified_Ascomycota	f__unidentified_Ascomycota	g__unidentified_Ascomycota	s__unidentified_Ascomycota	SH006197.07FU_FJ008686_reps_singleton
OTU1284	0	0	0	0	0	0	0	0	0	0	0	2	0	0	0	0	0	0	0	0	0	0	0	0	0	0	0	0	0	0	0	0	0	0	0	0	k__Fungi	p__Ascomycota	c__unidentified_Ascomycota	o__unidentified_Ascomycota	f__unidentified_Ascomycota	g__unidentified_Ascomycota	s__unidentified_Ascomycota	New.CleanUp.ReferenceOTU5593
OTU1306	0	0	0	0	0	0	0	0	0	0	0	0	0	0	0	0	0	0	0	0	0	0	0	0	0	0	0	2	0	0	0	0	0	0	0	0	k__Fungi	p__Ascomycota	c__unidentified_Ascomycota	o__unidentified_Ascomycota	f__unidentified_Ascomycota	g__unidentified_Ascomycota	s__unidentified_Ascomycota	New.CleanUp.ReferenceOTU14570
OTU1312	0	0	0	0	0	0	0	0	0	0	0	0	0	0	2	0	0	0	0	0	0	0	0	0	0	0	0	0	0	0	0	0	0	0	0	0	k__Fungi	p__Ascomycota	c__unidentified_Ascomycota	o__unidentified_Ascomycota	f__unidentified_Ascomycota	g__unidentified_Ascomycota	s__unidentified_Ascomycota	New.CleanUp.ReferenceOTU17200
OTU1350	0	0	0	0	0	0	0	0	0	0	0	0	0	0	0	0	0	0	0	0	0	0	0	0	0	0	1	0	0	0	1	0	0	0	0	0	k__Fungi	p__Ascomycota	c__unidentified_Ascomycota	o__unidentified_Ascomycota	f__unidentified_Ascomycota	g__unidentified_Ascomycota	s__unidentified_Ascomycota	New.CleanUp.ReferenceOTU29187
OTU1357	0	0	0	0	0	0	0	0	0	0	0	0	0	0	0	0	0	2	0	0	0	0	0	0	0	0	0	0	0	0	0	0	0	0	0	0	k__Fungi	p__Ascomycota	c__unidentified_Ascomycota	o__unidentified_Ascomycota	f__unidentified_Ascomycota	g__unidentified_Ascomycota	s__unidentified_Ascomycota	New.CleanUp.ReferenceOTU31751
OTU1380	0	0	0	0	0	0	0	0	0	0	0	0	0	0	0	0	0	0	0	0	0	0	0	0	0	0	0	0	1	0	0	1	0	0	0	0	k__Fungi	p__Ascomycota	c__unidentified_Ascomycota	o__unidentified_Ascomycota	f__unidentified_Ascomycota	g__unidentified_Ascomycota	s__unidentified_Ascomycota	New.CleanUp.ReferenceOTU41852
OTU1386	2	0	0	0	0	0	0	0	0	0	0	0	0	0	0	0	0	0	0	0	0	0	0	0	0	0	0	0	0	0	0	0	0	0	0	0	k__Fungi	p__Ascomycota	c__unidentified_Ascomycota	o__unidentified_Ascomycota	f__unidentified_Ascomycota	g__unidentified_Ascomycota	s__unidentified_Ascomycota	New.CleanUp.ReferenceOTU43668
OTU1455	0	0	0	0	0	0	0	0	0	0	0	0	0	0	0	0	0	0	0	0	0	0	0	0	0	0	0	0	0	0	0	0	0	2	0	0	k__Fungi	p__Ascomycota	c__unidentified_Ascomycota	o__unidentified_Ascomycota	f__unidentified_Ascomycota	g__unidentified_Ascomycota	s__unidentified_Ascomycota	New.CleanUp.ReferenceOTU65526
OTU1456	0	0	0	0	0	2	0	0	0	0	0	0	0	0	0	0	0	0	0	0	0	0	0	0	0	0	0	0	0	0	0	0	0	0	0	0	k__Fungi	p__Ascomycota	c__unidentified_Ascomycota	o__unidentified_Ascomycota	f__unidentified_Ascomycota	g__unidentified_Ascomycota	s__unidentified_Ascomycota	New.CleanUp.ReferenceOTU65571
OTU1517	0	0	0	0	0	0	0	0	0	0	0	0	0	0	0	0	0	0	0	0	0	0	0	0	0	0	0	0	2	0	0	0	0	0	0	0	k__Fungi	p__Ascomycota	c__unidentified_Ascomycota	o__unidentified_Ascomycota	f__unidentified_Ascomycota	g__unidentified_Ascomycota	s__unidentified_Ascomycota	New.CleanUp.ReferenceOTU81364
OTU1533	0	2	0	0	0	0	0	0	0	0	0	0	0	0	0	0	0	0	0	0	0	0	0	0	0	0	0	0	0	0	0	0	0	0	0	0	k__Fungi	p__Ascomycota	c__unidentified_Ascomycota	o__unidentified_Ascomycota	f__unidentified_Ascomycota	g__unidentified_Ascomycota	s__unidentified_Ascomycota	New.CleanUp.ReferenceOTU85940
OTU1536	0	0	0	0	0	0	0	0	0	0	0	0	0	0	0	0	0	0	0	0	0	0	0	0	0	0	0	0	0	2	0	0	0	0	0	0	k__Fungi	p__Ascomycota	c__unidentified_Ascomycota	o__unidentified_Ascomycota	f__unidentified_Ascomycota	g__unidentified_Ascomycota	s__unidentified_Ascomycota	New.CleanUp.ReferenceOTU87113
OTU1571	0	0	0	0	0	0	0	0	0	0	0	0	0	0	0	0	0	0	0	0	0	0	0	0	0	0	0	0	1	0	1	0	0	0	0	0	k__Fungi	p__Ascomycota	c__unidentified_Ascomycota	o__unidentified_Ascomycota	f__unidentified_Ascomycota	g__unidentified_Ascomycota	s__unidentified_Ascomycota	New.CleanUp.ReferenceOTU98756
OTU1582	0	0	0	0	0	0	0	0	0	0	0	2	0	0	0	0	0	0	0	0	0	0	0	0	0	0	0	0	0	0	0	0	0	0	0	0	k__Fungi	p__Ascomycota	c__unidentified_Ascomycota	o__unidentified_Ascomycota	f__unidentified_Ascomycota	g__unidentified_Ascomycota	s__unidentified_Ascomycota	New.CleanUp.ReferenceOTU102677
OTU1586	0	0	2	0	0	0	0	0	0	0	0	0	0	0	0	0	0	0	0	0	0	0	0	0	0	0	0	0	0	0	0	0	0	0	0	0	k__Fungi	p__Ascomycota	c__unidentified_Ascomycota	o__unidentified_Ascomycota	f__unidentified_Ascomycota	g__unidentified_Ascomycota	s__unidentified_Ascomycota	New.CleanUp.ReferenceOTU104482
OTU1637	0	0	0	0	0	0	1	1	0	0	0	0	0	0	0	0	0	0	0	0	0	0	0	0	0	0	0	0	0	0	0	0	0	0	0	0	k__Fungi	p__Ascomycota	c__unidentified_Ascomycota	o__unidentified_Ascomycota	f__unidentified_Ascomycota	g__unidentified_Ascomycota	s__unidentified_Ascomycota	New.CleanUp.ReferenceOTU122358
OTU2407	0	0	0	0	0	1	0	0	0	1	0	0	0	0	0	0	0	0	0	0	0	0	0	0	0	0	0	0	0	0	0	0	0	0	0	0	k__Fungi	p__Ascomycota	c__unidentified_Ascomycota	o__unidentified_Ascomycota	f__unidentified_Ascomycota	g__unidentified_Ascomycota	s__unidentified_Ascomycota	SH008258.07FU_KF428527_reps_singleton
OTU2505	0	0	0	0	0	0	0	0	0	0	0	0	1	0	0	0	0	0	0	0	0	1	0	0	0	0	0	0	0	0	0	0	0	0	0	0	k__Fungi	p__Ascomycota	c__unidentified_Ascomycota	o__unidentified_Ascomycota	f__unidentified_Ascomycota	g__unidentified_Ascomycota	s__unidentified_Ascomycota	New.CleanUp.ReferenceOTU23391
OTU2581	0	0	0	1	0	0	0	0	0	0	0	0	0	0	0	0	0	1	0	0	0	0	0	0	0	0	0	0	0	0	0	0	0	0	0	0	k__Fungi	p__Ascomycota	c__unidentified_Ascomycota	o__unidentified_Ascomycota	f__unidentified_Ascomycota	g__unidentified_Ascomycota	s__unidentified_Ascomycota	New.CleanUp.ReferenceOTU76040
OTU2610	0	0	0	0	1	0	0	0	0	0	0	0	0	0	0	0	0	0	0	0	0	0	0	0	0	1	0	0	0	0	0	0	0	0	0	0	k__Fungi	p__Ascomycota	c__unidentified_Ascomycota	o__unidentified_Ascomycota	f__unidentified_Ascomycota	g__unidentified_Ascomycota	s__unidentified_Ascomycota	New.CleanUp.ReferenceOTU96746
OTU3051	0	0	0	0	0	0	0	0	0	0	0	0	0	0	0	0	0	0	0	0	0	0	0	0	0	0	0	0	0	0	0	0	2	0	0	0	k__Fungi	p__Ascomycota	c__unidentified_Ascomycota	o__unidentified_Ascomycota	f__unidentified_Ascomycota	g__unidentified_Ascomycota	s__unidentified_Ascomycota	New.CleanUp.ReferenceOTU38876
OTU5284	0	0	0	0	0	0	0	0	0	0	0	0	0	0	0	0	0	0	0	2	0	0	0	0	0	0	0	0	0	0	0	0	0	0	0	0	k__Fungi	p__Ascomycota	c__unidentified_Ascomycota	o__unidentified_Ascomycota	f__unidentified_Ascomycota	g__unidentified_Ascomycota	s__unidentified_Ascomycota	New.CleanUp.ReferenceOTU4475
OTU91	1	0	0	0	0	0	0	0	0	0	0	0	0	0	0	0	0	0	0	0	0	0	0	0	0	0	0	0	0	0	0	0	0	0	0	0	k__Fungi	p__Ascomycota	c__unidentified_Ascomycota	o__unidentified_Ascomycota	f__unidentified_Ascomycota	g__unidentified_Ascomycota	s__unidentified_Ascomycota	SH026897.07FU_AM901898_reps_singleton
OTU92	0	0	0	0	0	0	0	0	0	0	0	0	0	1	0	0	0	0	0	0	0	0	0	0	0	0	0	0	0	0	0	0	0	0	0	0	k__Fungi	p__Ascomycota	c__unidentified_Ascomycota	o__unidentified_Ascomycota	f__unidentified_Ascomycota	g__unidentified_Ascomycota	s__unidentified_Ascomycota	SH031534.07FU_KC455319_reps
OTU105	0	0	0	0	1	0	0	0	0	0	0	0	0	0	0	0	0	0	0	0	0	0	0	0	0	0	0	0	0	0	0	0	0	0	0	0	k__Fungi	p__Ascomycota	c__unidentified_Ascomycota	o__unidentified_Ascomycota	f__unidentified_Ascomycota	g__unidentified_Ascomycota	s__unidentified_Ascomycota	SH022603.07FU_EF589898_reps
OTU133	0	0	0	0	0	0	0	0	0	0	0	0	0	0	0	0	0	0	0	0	0	0	0	0	1	0	0	0	0	0	0	0	0	0	0	0	k__Fungi	p__Ascomycota	c__unidentified_Ascomycota	o__unidentified_Ascomycota	f__unidentified_Ascomycota	g__unidentified_Ascomycota	s__unidentified_Ascomycota	New.ReferenceOTU684
OTU154	0	0	0	0	0	0	0	0	0	0	0	0	1	0	0	0	0	0	0	0	0	0	0	0	0	0	0	0	0	0	0	0	0	0	0	0	k__Fungi	p__Ascomycota	c__unidentified_Ascomycota	o__unidentified_Ascomycota	f__unidentified_Ascomycota	g__unidentified_Ascomycota	s__unidentified_Ascomycota	New.CleanUp.ReferenceOTU4525
OTU175	0	0	0	0	0	1	0	0	0	0	0	0	0	0	0	0	0	0	0	0	0	0	0	0	0	0	0	0	0	0	0	0	0	0	0	0	k__Fungi	p__Ascomycota	c__unidentified_Ascomycota	o__unidentified_Ascomycota	f__unidentified_Ascomycota	g__unidentified_Ascomycota	s__unidentified_Ascomycota	New.CleanUp.ReferenceOTU10693
OTU184	0	0	1	0	0	0	0	0	0	0	0	0	0	0	0	0	0	0	0	0	0	0	0	0	0	0	0	0	0	0	0	0	0	0	0	0	k__Fungi	p__Ascomycota	c__unidentified_Ascomycota	o__unidentified_Ascomycota	f__unidentified_Ascomycota	g__unidentified_Ascomycota	s__unidentified_Ascomycota	New.CleanUp.ReferenceOTU12828
OTU187	0	0	0	0	0	0	0	0	0	0	0	0	0	0	0	0	0	0	0	0	0	0	0	0	0	0	1	0	0	0	0	0	0	0	0	0	k__Fungi	p__Ascomycota	c__unidentified_Ascomycota	o__unidentified_Ascomycota	f__unidentified_Ascomycota	g__unidentified_Ascomycota	s__unidentified_Ascomycota	New.CleanUp.ReferenceOTU13355
OTU198	0	0	0	1	0	0	0	0	0	0	0	0	0	0	0	0	0	0	0	0	0	0	0	0	0	0	0	0	0	0	0	0	0	0	0	0	k__Fungi	p__Ascomycota	c__unidentified_Ascomycota	o__unidentified_Ascomycota	f__unidentified_Ascomycota	g__unidentified_Ascomycota	s__unidentified_Ascomycota	New.CleanUp.ReferenceOTU17403
OTU220	0	0	0	0	0	0	0	1	0	0	0	0	0	0	0	0	0	0	0	0	0	0	0	0	0	0	0	0	0	0	0	0	0	0	0	0	k__Fungi	p__Ascomycota	c__unidentified_Ascomycota	o__unidentified_Ascomycota	f__unidentified_Ascomycota	g__unidentified_Ascomycota	s__unidentified_Ascomycota	New.CleanUp.ReferenceOTU23611
OTU225	0	0	0	1	0	0	0	0	0	0	0	0	0	0	0	0	0	0	0	0	0	0	0	0	0	0	0	0	0	0	0	0	0	0	0	0	k__Fungi	p__Ascomycota	c__unidentified_Ascomycota	o__unidentified_Ascomycota	f__unidentified_Ascomycota	g__unidentified_Ascomycota	s__unidentified_Ascomycota	New.CleanUp.ReferenceOTU24619
OTU239	0	0	0	0	0	0	0	0	0	0	0	0	0	0	0	0	0	0	0	0	0	0	0	0	0	0	0	0	0	1	0	0	0	0	0	0	k__Fungi	p__Ascomycota	c__unidentified_Ascomycota	o__unidentified_Ascomycota	f__unidentified_Ascomycota	g__unidentified_Ascomycota	s__unidentified_Ascomycota	New.CleanUp.ReferenceOTU29819
OTU255	1	0	0	0	0	0	0	0	0	0	0	0	0	0	0	0	0	0	0	0	0	0	0	0	0	0	0	0	0	0	0	0	0	0	0	0	k__Fungi	p__Ascomycota	c__unidentified_Ascomycota	o__unidentified_Ascomycota	f__unidentified_Ascomycota	g__unidentified_Ascomycota	s__unidentified_Ascomycota	New.CleanUp.ReferenceOTU35267
OTU269	0	0	0	0	0	0	0	0	0	0	0	0	0	0	0	0	0	0	0	0	0	0	0	0	0	0	0	1	0	0	0	0	0	0	0	0	k__Fungi	p__Ascomycota	c__unidentified_Ascomycota	o__unidentified_Ascomycota	f__unidentified_Ascomycota	g__unidentified_Ascomycota	s__unidentified_Ascomycota	New.CleanUp.ReferenceOTU39912
OTU292	0	0	0	0	0	0	0	0	0	0	0	0	0	0	0	0	0	0	1	0	0	0	0	0	0	0	0	0	0	0	0	0	0	0	0	0	k__Fungi	p__Ascomycota	c__unidentified_Ascomycota	o__unidentified_Ascomycota	f__unidentified_Ascomycota	g__unidentified_Ascomycota	s__unidentified_Ascomycota	New.CleanUp.ReferenceOTU48439
OTU340	0	0	0	0	0	0	0	0	0	0	0	0	0	0	0	0	0	0	0	0	0	0	0	0	0	0	0	0	0	0	0	0	0	1	0	0	k__Fungi	p__Ascomycota	c__unidentified_Ascomycota	o__unidentified_Ascomycota	f__unidentified_Ascomycota	g__unidentified_Ascomycota	s__unidentified_Ascomycota	New.CleanUp.ReferenceOTU62923
OTU393	0	0	0	0	0	0	0	0	0	0	0	0	0	0	0	0	0	0	0	0	0	0	0	0	0	1	0	0	0	0	0	0	0	0	0	0	k__Fungi	p__Ascomycota	c__unidentified_Ascomycota	o__unidentified_Ascomycota	f__unidentified_Ascomycota	g__unidentified_Ascomycota	s__unidentified_Ascomycota	New.CleanUp.ReferenceOTU78125
OTU403	0	0	0	0	0	0	0	0	0	0	0	0	0	0	0	0	0	1	0	0	0	0	0	0	0	0	0	0	0	0	0	0	0	0	0	0	k__Fungi	p__Ascomycota	c__unidentified_Ascomycota	o__unidentified_Ascomycota	f__unidentified_Ascomycota	g__unidentified_Ascomycota	s__unidentified_Ascomycota	New.CleanUp.ReferenceOTU80414
OTU431	0	0	0	0	0	0	0	0	0	0	0	0	0	0	0	0	0	0	0	0	0	0	0	0	0	0	0	0	0	1	0	0	0	0	0	0	k__Fungi	p__Ascomycota	c__unidentified_Ascomycota	o__unidentified_Ascomycota	f__unidentified_Ascomycota	g__unidentified_Ascomycota	s__unidentified_Ascomycota	New.CleanUp.ReferenceOTU89732
OTU469	0	0	0	0	0	0	0	0	0	0	0	0	1	0	0	0	0	0	0	0	0	0	0	0	0	0	0	0	0	0	0	0	0	0	0	0	k__Fungi	p__Ascomycota	c__unidentified_Ascomycota	o__unidentified_Ascomycota	f__unidentified_Ascomycota	g__unidentified_Ascomycota	s__unidentified_Ascomycota	New.CleanUp.ReferenceOTU100679
OTU470	0	0	1	0	0	0	0	0	0	0	0	0	0	0	0	0	0	0	0	0	0	0	0	0	0	0	0	0	0	0	0	0	0	0	0	0	k__Fungi	p__Ascomycota	c__unidentified_Ascomycota	o__unidentified_Ascomycota	f__unidentified_Ascomycota	g__unidentified_Ascomycota	s__unidentified_Ascomycota	New.CleanUp.ReferenceOTU100782
OTU503	0	0	0	0	0	0	0	0	0	0	0	0	0	0	0	0	0	1	0	0	0	0	0	0	0	0	0	0	0	0	0	0	0	0	0	0	k__Fungi	p__Ascomycota	c__unidentified_Ascomycota	o__unidentified_Ascomycota	f__unidentified_Ascomycota	g__unidentified_Ascomycota	s__unidentified_Ascomycota	New.CleanUp.ReferenceOTU110515
OTU510	0	0	0	0	0	0	0	0	0	0	0	0	0	0	0	0	0	0	0	0	0	0	0	0	0	1	0	0	0	0	0	0	0	0	0	0	k__Fungi	p__Ascomycota	c__unidentified_Ascomycota	o__unidentified_Ascomycota	f__unidentified_Ascomycota	g__unidentified_Ascomycota	s__unidentified_Ascomycota	New.CleanUp.ReferenceOTU113337
OTU513	0	0	0	0	0	0	0	0	0	0	0	0	0	0	0	0	0	0	0	1	0	0	0	0	0	0	0	0	0	0	0	0	0	0	0	0	k__Fungi	p__Ascomycota	c__unidentified_Ascomycota	o__unidentified_Ascomycota	f__unidentified_Ascomycota	g__unidentified_Ascomycota	s__unidentified_Ascomycota	New.CleanUp.ReferenceOTU114771
OTU518	0	0	1	0	0	0	0	0	0	0	0	0	0	0	0	0	0	0	0	0	0	0	0	0	0	0	0	0	0	0	0	0	0	0	0	0	k__Fungi	p__Ascomycota	c__unidentified_Ascomycota	o__unidentified_Ascomycota	f__unidentified_Ascomycota	g__unidentified_Ascomycota	s__unidentified_Ascomycota	New.CleanUp.ReferenceOTU115423
OTU531	0	0	0	0	0	0	0	0	0	0	1	0	0	0	0	0	0	0	0	0	0	0	0	0	0	0	0	0	0	0	0	0	0	0	0	0	k__Fungi	p__Ascomycota	c__unidentified_Ascomycota	o__unidentified_Ascomycota	f__unidentified_Ascomycota	g__unidentified_Ascomycota	s__unidentified_Ascomycota	New.CleanUp.ReferenceOTU118734
OTU547	0	0	0	0	0	0	0	0	0	0	0	0	0	0	0	0	0	0	0	0	0	0	0	0	0	0	0	0	0	0	0	0	0	0	0	1	k__Fungi	p__Ascomycota	c__unidentified_Ascomycota	o__unidentified_Ascomycota	f__unidentified_Ascomycota	g__unidentified_Ascomycota	s__unidentified_Ascomycota	New.CleanUp.ReferenceOTU122476
OTU1186	0	0	0	0	0	0	0	0	0	0	0	0	0	0	0	0	0	0	0	0	0	0	0	0	0	0	0	1	0	0	0	0	0	0	0	0	k__Fungi	p__Ascomycota	c__unidentified_Ascomycota	o__unidentified_Ascomycota	f__unidentified_Ascomycota	g__unidentified_Ascomycota	s__unidentified_Ascomycota	SH027941.07FU_FJ553943_reps
OTU1223	0	0	0	0	0	0	0	0	0	0	0	0	0	0	0	0	0	0	0	0	0	0	0	1	0	0	0	0	0	0	0	0	0	0	0	0	k__Fungi	p__Ascomycota	c__unidentified_Ascomycota	o__unidentified_Ascomycota	f__unidentified_Ascomycota	g__unidentified_Ascomycota	s__unidentified_Ascomycota	SH004769.07FU_KJ572124_reps
OTU1267	0	0	0	0	0	0	0	0	0	0	0	0	0	0	0	0	0	1	0	0	0	0	0	0	0	0	0	0	0	0	0	0	0	0	0	0	k__Fungi	p__Ascomycota	c__unidentified_Ascomycota	o__unidentified_Ascomycota	f__unidentified_Ascomycota	g__unidentified_Ascomycota	s__unidentified_Ascomycota	New.CleanUp.ReferenceOTU1962
OTU1291	1	0	0	0	0	0	0	0	0	0	0	0	0	0	0	0	0	0	0	0	0	0	0	0	0	0	0	0	0	0	0	0	0	0	0	0	k__Fungi	p__Ascomycota	c__unidentified_Ascomycota	o__unidentified_Ascomycota	f__unidentified_Ascomycota	g__unidentified_Ascomycota	s__unidentified_Ascomycota	New.CleanUp.ReferenceOTU8678
OTU1321	0	0	0	0	0	0	0	0	0	0	0	0	0	0	0	0	0	0	0	0	0	0	0	0	0	0	0	0	1	0	0	0	0	0	0	0	k__Fungi	p__Ascomycota	c__unidentified_Ascomycota	o__unidentified_Ascomycota	f__unidentified_Ascomycota	g__unidentified_Ascomycota	s__unidentified_Ascomycota	New.CleanUp.ReferenceOTU21350
OTU1600	0	0	0	0	0	0	0	0	0	0	0	0	0	0	0	0	0	0	0	0	0	0	0	0	0	0	0	1	0	0	0	0	0	0	0	0	k__Fungi	p__Ascomycota	c__unidentified_Ascomycota	o__unidentified_Ascomycota	f__unidentified_Ascomycota	g__unidentified_Ascomycota	s__unidentified_Ascomycota	New.CleanUp.ReferenceOTU109100
OTU2492	0	0	0	0	0	0	0	0	0	0	0	1	0	0	0	0	0	0	0	0	0	0	0	0	0	0	0	0	0	0	0	0	0	0	0	0	k__Fungi	p__Ascomycota	c__unidentified_Ascomycota	o__unidentified_Ascomycota	f__unidentified_Ascomycota	g__unidentified_Ascomycota	s__unidentified_Ascomycota	New.CleanUp.ReferenceOTU15107
OTU4629	0	0	0	0	0	0	1	3	0	1	3	0	0	0	0	0	0	0	0	0	0	1	7	0	0	0	0	0	0	0	0	0	0	0	0	0	k__Fungi	p__Ascomycota	c__Archaeorhizomycetes	o__Archaeorhizomycetales	f__Archaeorhizomycetaceae	g__Archaeorhizomyces	s__unidentified__Archaeorhizomyces	SH032850.07FU_GU174326_reps
OTU3116	0	0	0	0	0	0	0	0	0	1	3	0	0	0	0	0	0	0	0	0	0	0	0	0	0	0	0	0	0	0	0	0	0	0	0	0	k__Fungi	p__Ascomycota	c__Archaeorhizomycetes	o__Archaeorhizomycetales	f__Archaeorhizomycetaceae	g__Archaeorhizomyces	s__unidentified__Archaeorhizomyces	New.CleanUp.ReferenceOTU101004
OTU1219	0	0	0	0	0	0	1	0	0	1	0	0	0	0	0	0	0	0	0	0	0	0	0	0	0	0	0	0	0	0	0	0	0	0	0	0	k__Fungi	p__Ascomycota	c__Archaeorhizomycetes	o__Archaeorhizomycetales	f__Archaeorhizomycetaceae	g__Archaeorhizomyces	s__unidentified__Archaeorhizomyces	SH025552.07FU_GU174290_reps_singleton
OTU5846	0	0	0	0	21	0	0	0	0	0	0	0	0	0	0	0	0	0	0	0	0	0	63	0	0	0	0	0	0	0	0	0	0	0	0	0	k__Fungi	p__Ascomycota	c__Dothideomycetes	o__unidentified_Dothideomycetes	f__unidentified_Dothideomycetes	g__unidentified_Dothideomycetes	s__unidentified_Dothideomycetes	New.ReferenceOTU122
OTU5637	0	0	0	0	0	0	2	50	0	4	0	0	0	0	0	4	0	0	0	0	0	0	0	0	0	0	0	0	0	0	0	0	0	0	0	0	k__Fungi	p__Ascomycota	c__Dothideomycetes	o__unidentified_Dothideomycetes	f__unidentified_Dothideomycetes	g__unidentified_Dothideomycetes	s__unidentified_Dothideomycetes	New.CleanUp.ReferenceOTU104490
OTU5413	7	0	1	1	0	0	0	0	0	0	0	0	0	0	0	0	0	1	0	2	0	0	0	0	0	0	1	0	1	0	0	0	0	27	0	0	k__Fungi	p__Ascomycota	c__Dothideomycetes	o__unidentified_Dothideomycetes	f__unidentified_Dothideomycetes	g__unidentified_Dothideomycetes	s__unidentified_Dothideomycetes	New.CleanUp.ReferenceOTU63209
OTU5543	0	0	1	3	12	4	0	6	0	0	0	0	0	0	0	0	0	0	0	2	0	0	0	0	0	0	0	0	0	0	0	0	0	0	0	0	k__Fungi	p__Ascomycota	c__Dothideomycetes	o__unidentified_Dothideomycetes	f__unidentified_Dothideomycetes	g__unidentified_Dothideomycetes	s__unidentified_Dothideomycetes	SH005063.07FU_JF519399_reps
OTU5507	0	0	0	2	2	0	0	12	0	0	0	0	0	0	0	0	0	0	0	0	4	0	4	0	0	0	0	0	0	0	0	0	0	0	0	0	k__Fungi	p__Ascomycota	c__Dothideomycetes	o__unidentified_Dothideomycetes	f__unidentified_Dothideomycetes	g__unidentified_Dothideomycetes	s__unidentified_Dothideomycetes	SH012931.07FU_KF675718_reps
OTU5416	0	0	2	0	0	0	0	0	0	0	0	0	12	1	2	0	2	0	2	0	0	0	0	0	0	0	0	0	0	0	0	0	0	0	0	0	k__Fungi	p__Ascomycota	c__Dothideomycetes	o__unidentified_Dothideomycetes	f__unidentified_Dothideomycetes	g__unidentified_Dothideomycetes	s__unidentified_Dothideomycetes	New.CleanUp.ReferenceOTU70945
OTU4464	0	0	0	0	0	0	0	1	0	0	0	0	0	0	0	0	0	0	0	0	12	0	0	0	0	0	0	0	0	0	0	0	0	0	0	0	k__Fungi	p__Ascomycota	c__Dothideomycetes	o__unidentified_Dothideomycetes	f__unidentified_Dothideomycetes	g__unidentified_Dothideomycetes	s__unidentified_Dothideomycetes	New.CleanUp.ReferenceOTU26350
OTU4474	0	0	3	0	0	0	0	0	0	0	0	0	0	0	0	4	0	0	0	0	0	0	0	0	0	1	0	0	0	2	0	0	1	0	0	0	k__Fungi	p__Ascomycota	c__Dothideomycetes	o__unidentified_Dothideomycetes	f__unidentified_Dothideomycetes	g__unidentified_Dothideomycetes	s__unidentified_Dothideomycetes	New.CleanUp.ReferenceOTU87956
OTU3980	0	0	0	0	0	0	0	0	0	0	0	0	0	0	0	0	0	0	0	0	2	0	6	0	0	0	0	0	0	0	0	0	0	0	0	0	k__Fungi	p__Ascomycota	c__Dothideomycetes	o__unidentified_Dothideomycetes	f__unidentified_Dothideomycetes	g__unidentified_Dothideomycetes	s__unidentified_Dothideomycetes	New.CleanUp.ReferenceOTU98086
OTU3640	0	0	0	0	0	0	0	0	0	0	0	0	0	0	0	0	0	6	0	0	0	0	0	0	0	0	0	0	0	0	0	0	0	0	0	0	k__Fungi	p__Ascomycota	c__Dothideomycetes	o__unidentified_Dothideomycetes	f__unidentified_Dothideomycetes	g__unidentified_Dothideomycetes	s__unidentified_Dothideomycetes	New.CleanUp.ReferenceOTU93581
OTU4895	0	0	0	0	0	0	0	0	0	0	0	0	0	0	0	0	0	0	0	0	0	0	0	0	0	0	0	3	0	3	0	0	0	0	0	0	k__Fungi	p__Ascomycota	c__Dothideomycetes	o__unidentified_Dothideomycetes	f__unidentified_Dothideomycetes	g__unidentified_Dothideomycetes	s__unidentified_Dothideomycetes	New.CleanUp.ReferenceOTU5924
OTU3817	0	0	0	0	0	0	0	0	0	0	0	0	0	0	0	3	0	0	2	0	0	0	0	0	0	0	0	0	0	0	0	0	0	0	0	0	k__Fungi	p__Ascomycota	c__Dothideomycetes	o__unidentified_Dothideomycetes	f__unidentified_Dothideomycetes	g__unidentified_Dothideomycetes	s__unidentified_Dothideomycetes	New.CleanUp.ReferenceOTU95412
OTU4525	0	0	0	0	1	0	0	0	0	0	0	0	0	0	0	0	0	0	0	0	1	0	0	0	0	0	0	0	0	0	2	0	0	0	0	1	k__Fungi	p__Ascomycota	c__Dothideomycetes	o__unidentified_Dothideomycetes	f__unidentified_Dothideomycetes	g__unidentified_Dothideomycetes	s__unidentified_Dothideomycetes	SH496364.07FU_KT269002_reps_singleton
OTU2585	0	0	0	0	0	0	0	0	0	0	3	0	0	0	0	0	0	0	0	0	0	0	0	0	0	0	0	0	0	0	0	0	0	0	0	0	k__Fungi	p__Ascomycota	c__Dothideomycetes	o__unidentified_Dothideomycetes	f__unidentified_Dothideomycetes	g__unidentified_Dothideomycetes	s__unidentified_Dothideomycetes	New.CleanUp.ReferenceOTU79355
OTU4270	0	0	0	0	0	0	3	0	0	0	0	0	0	0	0	0	0	0	0	0	0	0	0	0	0	0	0	0	0	0	0	0	0	0	0	0	k__Fungi	p__Ascomycota	c__Dothideomycetes	o__unidentified_Dothideomycetes	f__unidentified_Dothideomycetes	g__unidentified_Dothideomycetes	s__unidentified_Dothideomycetes	SH006643.07FU_GQ203792_reps_singleton
OTU1328	0	0	0	0	1	0	0	1	0	0	0	0	0	0	0	0	0	0	0	0	0	0	0	0	0	0	0	0	0	0	0	0	0	0	0	0	k__Fungi	p__Ascomycota	c__Dothideomycetes	o__unidentified_Dothideomycetes	f__unidentified_Dothideomycetes	g__unidentified_Dothideomycetes	s__unidentified_Dothideomycetes	New.CleanUp.ReferenceOTU22667
OTU50	0	0	0	0	0	0	0	0	0	0	0	0	0	0	0	0	0	0	0	0	0	0	0	0	0	0	0	0	1	0	0	0	0	0	0	0	k__Fungi	p__Ascomycota	c__Dothideomycetes	o__unidentified_Dothideomycetes	f__unidentified_Dothideomycetes	g__unidentified_Dothideomycetes	s__unidentified_Dothideomycetes	SH019254.07FU_FN394707_reps
OTU67	0	0	0	0	0	0	0	0	0	0	0	0	0	0	0	0	0	0	0	1	0	0	0	0	0	0	0	0	0	0	0	0	0	0	0	0	k__Fungi	p__Ascomycota	c__Dothideomycetes	o__unidentified_Dothideomycetes	f__unidentified_Dothideomycetes	g__unidentified_Dothideomycetes	s__unidentified_Dothideomycetes	SH020739.07FU_AY970144_reps
OTU241	0	0	0	1	0	0	0	0	0	0	0	0	0	0	0	0	0	0	0	0	0	0	0	0	0	0	0	0	0	0	0	0	0	0	0	0	k__Fungi	p__Ascomycota	c__Dothideomycetes	o__unidentified_Dothideomycetes	f__unidentified_Dothideomycetes	g__unidentified_Dothideomycetes	s__unidentified_Dothideomycetes	New.CleanUp.ReferenceOTU30375
OTU330	0	0	0	0	0	0	0	0	0	0	0	0	0	0	0	0	0	1	0	0	0	0	0	0	0	0	0	0	0	0	0	0	0	0	0	0	k__Fungi	p__Ascomycota	c__Dothideomycetes	o__unidentified_Dothideomycetes	f__unidentified_Dothideomycetes	g__unidentified_Dothideomycetes	s__unidentified_Dothideomycetes	New.CleanUp.ReferenceOTU59758
OTU448	0	0	1	0	0	0	0	0	0	0	0	0	0	0	0	0	0	0	0	0	0	0	0	0	0	0	0	0	0	0	0	0	0	0	0	0	k__Fungi	p__Ascomycota	c__Dothideomycetes	o__unidentified_Dothideomycetes	f__unidentified_Dothideomycetes	g__unidentified_Dothideomycetes	s__unidentified_Dothideomycetes	New.CleanUp.ReferenceOTU96748
OTU2967	0	0	0	0	0	0	0	0	0	0	0	0	0	0	0	0	0	0	0	0	0	0	0	0	4	0	0	0	0	0	0	0	0	0	0	0	k__Fungi	p__Ascomycota	c__Dothideomycetes	o__Botryosphaeriales	f__Botryosphaeriaceae	g__Diplodia	s__unidentified_Diplodia	SH025771.07FU_DQ458893_refs
OTU5238	0	0	0	0	0	0	0	0	0	0	0	3	0	0	0	0	0	0	0	0	0	0	0	0	0	0	0	0	0	0	0	0	0	0	0	0	k__Fungi	p__Ascomycota	c__Dothideomycetes	o__Botryosphaeriales	f__unidentified_Botryosphaeriales	g__unidentified_Botryosphaeriales	s__unidentified_Botryosphaeriales	SH022599.07FU_JF449510_reps
OTU6744	60	15	19	52	3	82	5	2	1	5	41	42	71	50	96	27	4	39	5	11	18	2	22	1	9	26	7	67	8	12	28	76	19	12	7	19	k__Fungi	p__Ascomycota	c__Dothideomycetes	o__Capnodiales	f__unidentified_Capnodiales	g__unidentified_Capnodiales	s__unidentified_Capnodiales	SH028821.07FU_EF679363_refs
OTU6352	7	4	2	2	8	6	7	6	0	44	66	63	0	0	0	6	0	0	0	0	0	4	46	0	0	1	0	0	0	4	0	0	0	2	0	0	k__Fungi	p__Ascomycota	c__Dothideomycetes	o__Capnodiales	f__unidentified_Capnodiales	g__unidentified_Capnodiales	s__unidentified_Capnodiales	SH012131.07FU_JQ585533_reps
OTU1179	0	0	0	2	0	0	0	0	0	0	0	0	0	0	0	0	0	0	0	0	0	0	0	0	0	0	0	0	0	0	0	0	0	0	0	0	k__Fungi	p__Ascomycota	c__Dothideomycetes	o__Capnodiales	f__unidentified_Capnodiales	g__unidentified_Capnodiales	s__unidentified_Capnodiales	SH018820.07FU_KF800501_reps
OTU6390	0	0	1	0	21	11	25	0	0	0	0	0	0	0	0	0	0	4	0	0	0	0	0	0	19	0	4	168	1	1	3	0	0	0	0	0	k__Fungi	p__Ascomycota	c__Dothideomycetes	o__Capnodiales	f__Capnodiales_fam_Incertae_sedis	g__Capnobotryella	s__unidentified_Capnobotryella	SH473352.07FU_GU174376_reps_singleton
OTU3340	0	0	0	1	0	1	0	0	0	0	0	0	0	0	0	0	0	0	0	0	0	0	0	0	0	0	0	0	0	0	0	0	0	0	0	0	k__Fungi	p__Ascomycota	c__Dothideomycetes	o__Capnodiales	f__Davidiellaceae	g__Cladosporium	s__unidentified_Cladosporium	SH492655.07FU_KT329224_reps_singleton
OTU35	0	0	0	0	0	0	0	0	0	0	0	1	0	0	0	0	0	0	0	0	0	0	0	0	0	0	0	0	0	0	0	0	0	0	0	0	k__Fungi	p__Ascomycota	c__Dothideomycetes	o__Capnodiales	f__Davidiellaceae	g__Cladosporium	s__unidentified_Cladosporium	SH496412.07FU_KT315484_reps_singleton
OTU336	0	0	0	0	0	0	0	0	0	0	0	0	1	0	0	0	0	0	0	0	0	0	0	0	0	0	0	0	0	0	0	0	0	0	0	0	k__Fungi	p__Ascomycota	c__Dothideomycetes	o__Capnodiales	f__Davidiellaceae	g__Cladosporium	s__unidentified_Cladosporium	New.CleanUp.ReferenceOTU61404
OTU2990	2	0	0	0	0	0	0	0	0	0	0	0	0	0	0	0	0	0	0	0	0	0	0	0	0	0	0	0	1	0	0	0	0	0	0	0	k__Fungi	p__Ascomycota	c__Dothideomycetes	o__Capnodiales	f__Davidiellaceae	g__Cladosporium	s__unidentified_Cladosporium	SH026647.07FU_AF050265_reps
OTU1264	0	0	0	0	0	0	0	0	0	0	0	0	0	0	0	0	0	0	0	0	0	0	0	0	0	0	0	0	0	2	0	0	0	0	0	0	k__Fungi	p__Ascomycota	c__Dothideomycetes	o__Capnodiales	f__Davidiellaceae	g__Cladosporium	s__Cladosporium_colocasiae	New.CleanUp.ReferenceOTU526
OTU5089	0	0	0	2	0	0	1	0	0	0	0	2	13	0	0	10	0	0	0	0	0	0	0	0	0	0	0	0	0	0	0	0	0	0	0	0	k__Fungi	p__Ascomycota	c__Dothideomycetes	o__Capnodiales	f__Mycosphaerellaceae	g__unidentified_Mycosphaerellaceae	s__unidentified_Mycosphaerellaceae	SH021511.07FU_DQ019381_reps
OTU4447	0	0	0	0	0	0	5	0	0	0	2	0	0	4	0	0	0	0	0	0	0	0	2	0	0	0	0	0	0	0	0	0	0	0	0	0	k__Fungi	p__Ascomycota	c__Dothideomycetes	o__Capnodiales	f__Mycosphaerellaceae	g__unidentified_Mycosphaerellaceae	s__unidentified_Mycosphaerellaceae	SH022041.07FU_KF251637_refs
OTU6306	1	1	4	1	0	0	0	0	0	0	0	1	0	26	51	30	5	2	0	4	45	10	11	0	2	9	0	2	6	0	0	3	0	0	0	0	k__Fungi	p__Ascomycota	c__Dothideomycetes	o__Capnodiales	f__Mycosphaerellaceae	g__Ramularia	s__unidentified_Ramularia	SH022043.07FU_HQ728117_refs
OTU5824	1	1	0	0	0	0	0	0	0	0	0	0	5	0	6	2	1	3	0	0	12	1	0	0	0	3	1	1	0	0	0	2	0	0	0	3	k__Fungi	p__Ascomycota	c__Dothideomycetes	o__Capnodiales	f__Mycosphaerellaceae	g__Ramularia	s__unidentified_Ramularia	New.CleanUp.ReferenceOTU73049
OTU521	0	0	0	0	0	0	0	0	0	0	0	0	0	0	0	0	0	0	0	0	0	0	0	0	0	0	0	0	1	0	0	0	0	0	0	0	k__Fungi	p__Ascomycota	c__Dothideomycetes	o__Capnodiales	f__Mycosphaerellaceae	g__Ramularia	s__unidentified_Ramularia	New.CleanUp.ReferenceOTU116353
OTU6710	10	14	11	8	0	8	5	0	0	0	4	12	25	111	248	127	15	30	0	24	12	3	24	15	10	19	0	2	36	1	6	2	2	0	0	2	k__Fungi	p__Ascomycota	c__Dothideomycetes	o__Capnodiales	f__Mycosphaerellaceae	g__Ramularia	s__Ramularia_cynarae	New.CleanUp.ReferenceOTU88800
OTU1377	0	0	0	0	0	0	0	0	0	0	0	0	0	1	0	0	0	0	0	0	0	0	1	0	0	0	0	0	0	0	0	0	0	0	0	0	k__Fungi	p__Ascomycota	c__Dothideomycetes	o__Capnodiales	f__Mycosphaerellaceae	g__Ramularia	s__Ramularia_cynarae	New.CleanUp.ReferenceOTU39865
OTU5321	7	1	0	0	0	0	0	0	0	0	0	8	0	5	2	1	4	0	4	0	0	0	0	0	0	0	0	0	0	0	0	0	0	0	0	0	k__Fungi	p__Ascomycota	c__Dothideomycetes	o__Capnodiales	f__Mycosphaerellaceae	g__Sphaerulina	s__Sphaerulina_quercicola	SH021503.07FU_KF251627_reps
OTU4073	0	0	0	0	0	0	0	0	0	0	0	0	0	0	0	0	0	0	0	0	9	0	0	0	0	0	0	0	0	0	0	0	0	0	0	0	k__Fungi	p__Ascomycota	c__Dothideomycetes	o__Capnodiales	f__Mycosphaerellaceae	g__Stromatoseptoria	s__Stromatoseptoria_castaneicola	SH017441.07FU_KF251271_reps
OTU2408	0	0	0	0	0	0	0	0	0	0	0	3	0	0	0	0	0	0	0	0	0	0	0	0	0	0	0	0	0	0	0	0	0	0	0	0	k__Fungi	p__Ascomycota	c__Dothideomycetes	o__Capnodiales	f__Mycosphaerellaceae	g__unidentified_Mycosphaerellaceae	s__unidentified_Mycosphaerellaceae	SH008974.07FU_DQ778612_reps_singleton
OTU1509	0	0	0	0	0	2	0	0	0	0	0	0	0	0	0	0	0	0	0	0	0	0	0	0	0	0	0	0	0	0	0	0	0	0	0	0	k__Fungi	p__Ascomycota	c__Dothideomycetes	o__Capnodiales	f__Mycosphaerellaceae	g__unidentified_Mycosphaerellaceae	s__unidentified_Mycosphaerellaceae	New.CleanUp.ReferenceOTU79204
OTU333	0	0	0	0	0	0	0	0	0	0	0	0	0	0	0	0	0	0	0	0	0	0	0	0	0	0	0	0	0	0	0	1	0	0	0	0	k__Fungi	p__Ascomycota	c__Dothideomycetes	o__Capnodiales	f__Mycosphaerellaceae	g__unidentified_Mycosphaerellaceae	s__unidentified_Mycosphaerellaceae	New.CleanUp.ReferenceOTU61068
OTU2969	0	0	0	0	0	0	0	0	0	0	0	0	0	0	0	0	0	0	0	0	0	0	0	0	0	0	0	0	0	0	0	1	0	0	0	0	k__Fungi	p__Ascomycota	c__Dothideomycetes	o__Capnodiales	f__Mycosphaerellaceae	g__unidentified_Mycosphaerellaceae	s__unidentified_Mycosphaerellaceae	SH012370.07FU_KF823590_reps
OTU3771	0	0	0	0	0	0	0	0	0	0	0	0	0	0	0	0	1	0	0	0	0	0	0	0	0	0	0	1	0	0	0	0	0	0	0	0	k__Fungi	p__Ascomycota	c__Dothideomycetes	o__Capnodiales	f__Teratosphaeriaceae	g__unidentified_Mycosphaerellaceae	s__unidentified_Mycosphaerellaceae	SH009128.07FU_KC005778_refs
OTU4272	0	0	0	0	0	0	0	0	0	0	0	0	0	0	5	0	0	0	0	0	0	0	0	0	0	0	0	0	0	0	0	0	0	0	0	0	k__Fungi	p__Ascomycota	c__Dothideomycetes	o__Capnodiales	f__Teratosphaeriaceae	g__unidentified_Mycosphaerellaceae	s__unidentified_Mycosphaerellaceae	SH012132.07FU_JF449736_reps
OTU5983	0	0	0	0	36	1	19	0	0	0	0	0	0	0	0	0	0	0	0	0	0	0	0	0	0	0	0	0	0	0	0	0	0	0	0	0	k__Fungi	p__Ascomycota	c__Dothideomycetes	o__Capnodiales	f__Teratosphaeriaceae	g__Devriesia	s__unidentified_Devriesia	New.ReferenceOTU657
OTU1466	0	0	0	0	0	0	0	0	0	0	0	0	0	0	0	0	0	0	0	0	0	0	0	0	0	0	0	0	0	0	0	0	0	0	0	1	k__Fungi	p__Ascomycota	c__Dothideomycetes	o__Capnodiales	f__Teratosphaeriaceae	g__Devriesia	s__Devriesia_tardicrescens	New.CleanUp.ReferenceOTU69726
OTU297	0	0	0	0	0	0	0	0	0	0	0	0	0	0	0	0	0	0	0	0	1	0	0	0	0	0	0	0	0	0	0	0	0	0	0	0	k__Fungi	p__Ascomycota	c__Dothideomycetes	o__Capnodiales	f__Teratosphaeriaceae	g__Neodevriesia	s__unidentified_Neodevriesia	New.CleanUp.ReferenceOTU50765
OTU1614	0	0	0	1	0	0	0	0	0	0	0	0	0	0	0	0	0	0	0	0	0	0	0	0	0	0	0	0	0	0	0	0	0	0	0	0	k__Fungi	p__Ascomycota	c__Dothideomycetes	o__Capnodiales	f__Teratosphaeriaceae	g__Neodevriesia	s__unidentified_Neodevriesia	New.CleanUp.ReferenceOTU111996
OTU6971	664	50	242	142	4	366	113	125	55	34	418	1207	367	183	432	222	62	189	132	144	44	28	41	23	78	135	83	214	171	228	83	719	128	84	216	191	k__Fungi	p__Ascomycota	c__Dothideomycetes	o__Capnodiales	f__unidentified_Capnodiales	g__unidentified_Capnodiales	s__unidentified_Capnodiales	SH025163.07FU_GU721215_reps
OTU6769	7	1	7	0	29	20	134	8	1	0	6	10	190	10	0	0	11	18	0	33	5	11	317	0	53	22	1	18	15	8	4	9	1	0	0	0	k__Fungi	p__Ascomycota	c__Dothideomycetes	o__Capnodiales	f__unidentified_Capnodiales	g__unidentified_Capnodiales	s__unidentified_Capnodiales	New.ReferenceOTU203
OTU6578	0	0	16	2	37	3	64	3	0	0	4	2	0	8	0	0	0	0	0	0	3	5	1	0	0	0	0	0	0	0	0	0	0	0	0	0	k__Fungi	p__Ascomycota	c__Dothideomycetes	o__Capnodiales	f__unidentified_Capnodiales	g__unidentified_Capnodiales	s__unidentified_Capnodiales	New.ReferenceOTU198
OTU6104	0	0	2	0	1	5	7	0	0	0	0	0	0	0	0	0	3	1	2	2	0	0	0	0	14	8	4	6	39	23	6	9	0	0	0	0	k__Fungi	p__Ascomycota	c__Dothideomycetes	o__Capnodiales	f__unidentified_Capnodiales	g__unidentified_Capnodiales	s__unidentified_Capnodiales	New.CleanUp.ReferenceOTU13653
OTU5789	2	1	1	0	0	0	0	0	0	0	1	1	0	0	0	0	0	13	1	0	0	1	0	0	0	4	3	3	0	0	0	4	2	0	0	2	k__Fungi	p__Ascomycota	c__Dothideomycetes	o__Capnodiales	f__unidentified_Capnodiales	g__unidentified_Capnodiales	s__unidentified_Capnodiales	SH495097.07FU_HG937110_reps_singleton
OTU5358	0	0	0	4	0	1	8	0	0	0	0	0	0	0	0	0	0	0	0	0	0	0	0	0	5	1	2	2	3	2	0	0	0	0	0	0	k__Fungi	p__Ascomycota	c__Dothideomycetes	o__Capnodiales	f__unidentified_Capnodiales	g__unidentified_Capnodiales	s__unidentified_Capnodiales	SH472617.07FU_KF617528_reps
OTU5533	0	0	14	1	0	0	0	0	0	0	0	0	8	0	0	0	0	0	0	0	0	0	5	0	0	0	0	0	0	0	0	0	0	0	0	0	k__Fungi	p__Ascomycota	c__Dothideomycetes	o__Capnodiales	f__unidentified_Capnodiales	g__unidentified_Capnodiales	s__unidentified_Capnodiales	SH016853.07FU_EU754974_reps_singleton
OTU5307	0	0	0	0	1	5	7	0	0	0	0	0	0	0	0	0	0	0	0	0	0	0	0	0	0	2	6	1	1	4	0	0	0	0	0	0	k__Fungi	p__Ascomycota	c__Dothideomycetes	o__Capnodiales	f__unidentified_Capnodiales	g__unidentified_Capnodiales	s__unidentified_Capnodiales	New.CleanUp.ReferenceOTU24415
OTU4635	0	0	0	0	0	0	0	0	0	0	0	2	0	0	0	7	4	0	0	0	0	0	0	0	0	0	0	1	1	0	0	0	0	0	0	0	k__Fungi	p__Ascomycota	c__Dothideomycetes	o__Capnodiales	f__unidentified_Capnodiales	g__unidentified_Capnodiales	s__unidentified_Capnodiales	SH468697.07FU_GU122904_reps_singleton
OTU4282	1	0	1	1	0	1	0	0	0	0	1	1	0	1	0	1	0	0	0	0	0	0	0	0	0	0	0	1	1	0	0	0	0	0	0	0	k__Fungi	p__Ascomycota	c__Dothideomycetes	o__Capnodiales	f__unidentified_Capnodiales	g__unidentified_Capnodiales	s__unidentified_Capnodiales	SH494205.07FU_KT268697_reps_singleton
OTU3348	0	0	0	0	3	1	0	0	0	0	0	0	0	0	0	0	0	0	0	0	0	0	0	1	0	0	0	0	0	0	0	0	0	0	0	0	k__Fungi	p__Ascomycota	c__Dothideomycetes	o__Capnodiales	f__unidentified_Capnodiales	g__unidentified_Capnodiales	s__unidentified_Capnodiales	SH019181.07FU_HM069372_reps
OTU2516	0	0	0	0	0	0	0	0	0	0	0	0	0	0	0	0	0	0	0	0	0	0	0	0	0	0	0	0	0	3	0	0	0	0	0	0	k__Fungi	p__Ascomycota	c__Dothideomycetes	o__Capnodiales	f__unidentified_Capnodiales	g__unidentified_Capnodiales	s__unidentified_Capnodiales	New.CleanUp.ReferenceOTU28247
OTU1564	0	0	0	0	0	0	2	0	0	0	0	0	0	0	0	0	0	0	0	0	0	0	0	0	0	0	0	0	0	0	0	0	0	0	0	0	k__Fungi	p__Ascomycota	c__Dothideomycetes	o__Capnodiales	f__unidentified_Capnodiales	g__unidentified_Capnodiales	s__unidentified_Capnodiales	New.CleanUp.ReferenceOTU96763
OTU2448	0	0	2	0	0	0	0	0	0	0	0	0	0	0	0	0	0	0	0	0	0	0	0	0	0	0	0	0	0	0	0	0	0	0	0	0	k__Fungi	p__Ascomycota	c__Dothideomycetes	o__Capnodiales	f__unidentified_Capnodiales	g__unidentified_Capnodiales	s__unidentified_Capnodiales	SH025822.07FU_HM030593_reps_singleton
OTU30	0	0	0	0	0	1	0	0	0	0	0	0	0	0	0	0	0	0	0	0	0	0	0	0	0	0	0	0	0	0	0	0	0	0	0	0	k__Fungi	p__Ascomycota	c__Dothideomycetes	o__Capnodiales	f__unidentified_Capnodiales	g__unidentified_Capnodiales	s__unidentified_Capnodiales	SH018815.07FU_AY843057_reps
OTU1182	0	0	0	0	0	0	0	0	0	0	0	1	0	0	0	0	0	0	0	0	0	0	0	0	0	0	0	0	0	0	0	0	0	0	0	0	k__Fungi	p__Ascomycota	c__Dothideomycetes	o__Capnodiales	f__unidentified_Capnodiales	g__unidentified_Capnodiales	s__unidentified_Capnodiales	SH001577.07FU_JF770450_refs
OTU6488	34	0	10	4	0	15	1	0	0	0	7	0	57	50	15	2	0	9	0	3	0	0	9	0	1	27	4	35	2	0	9	29	2	0	3	5	k__Fungi	p__Ascomycota	c__Dothideomycetes	o__Dothideales	f__Dothioraceae	g__Aureobasidium	s__unidentified_Aureobasidium	SH014188.07FU_AJ244232_refs
OTU75	0	0	0	0	0	0	0	0	0	0	0	0	0	0	0	0	0	0	0	0	0	0	0	0	0	0	0	1	0	0	0	0	0	0	0	0	k__Fungi	p__Ascomycota	c__Dothideomycetes	o__Dothideales	f__Dothioraceae	g__Aureobasidium	s__unidentified_Aureobasidium	SH014201.07FU_KF800543_reps_singleton
OTU1503	0	0	0	0	0	0	0	0	0	0	0	0	0	0	0	0	0	0	0	0	0	0	0	0	0	0	0	1	0	0	0	0	0	0	0	0	k__Fungi	p__Ascomycota	c__Dothideomycetes	o__Dothideales	f__Dothioraceae	g__unidentified_Dothioraceae	s__unidentified_Dothioraceae	New.CleanUp.ReferenceOTU77900
OTU3099	0	0	0	0	0	0	0	0	0	0	0	0	0	0	4	0	0	0	0	0	0	0	0	0	0	0	0	0	0	0	0	0	0	0	0	0	k__Fungi	p__Ascomycota	c__Dothideomycetes	o__Dothideomycetes_ord_Incertae_sedis	f__Dothideomycetes_fam_Incertae_sedis	g__Halokirschsteiniothelia	s__Halokirschsteiniothelia_maritima	New.CleanUp.ReferenceOTU84401
OTU41	0	0	0	0	0	0	0	0	0	0	0	0	0	0	0	0	0	0	0	0	0	0	0	0	0	0	0	0	1	0	0	0	0	0	0	0	k__Fungi	p__Ascomycota	c__Dothideomycetes	o__Dothideomycetes_ord_Incertae_sedis	f__Dothideomycetes_fam_Incertae_sedis	g__Peltaster	s__Peltaster_cerophilus	SH032396.07FU_KF646816_reps
OTU4759	0	0	0	0	0	0	0	0	0	0	0	18	0	0	0	0	0	0	0	0	0	0	0	0	0	0	0	0	0	0	0	0	0	0	0	0	k__Fungi	p__Ascomycota	c__Dothideomycetes	o__Dothideomycetes_ord_Incertae_sedis	f__Dothideomycetes_fam_Incertae_sedis	g__Zymoseptoria	s__Zymoseptoria_brevis	New.CleanUp.ReferenceOTU26898
OTU1367	0	0	0	0	0	0	0	0	0	0	0	2	0	0	0	0	0	0	0	0	0	0	0	0	0	0	0	0	0	0	0	0	0	0	0	0	k__Fungi	p__Ascomycota	c__Dothideomycetes	o__Dothideomycetes_ord_Incertae_sedis	f__Dothideomycetes_fam_Incertae_sedis	g__Zymoseptoria	s__Zymoseptoria_brevis	New.CleanUp.ReferenceOTU35310
OTU6643	1	1	22	8	2	3	43	2	2	0	0	0	81	19	1	17	8	36	5	7	0	0	3	0	37	35	0	0	93	21	14	4	0	0	0	0	k__Fungi	p__Ascomycota	c__Dothideomycetes	o__Dothideomycetidae_ord_Incertae_sedis	f__Eremomycetaceae	g__Arthrographis	s__Arthrographis_kalrae	New.CleanUp.ReferenceOTU93800
OTU4936	1	0	1	1	0	0	0	0	0	0	0	0	0	0	0	0	0	1	0	0	0	0	1	0	5	1	0	0	4	0	3	0	0	0	0	0	k__Fungi	p__Ascomycota	c__Dothideomycetes	o__Dothideomycetidae_ord_Incertae_sedis	f__Eremomycetaceae	g__Arthrographis	s__Arthrographis_kalrae	New.CleanUp.ReferenceOTU1046
OTU4876	0	0	0	0	0	0	0	0	0	0	0	0	0	0	0	0	0	0	0	0	0	0	0	0	12	0	0	0	2	1	0	0	0	0	0	0	k__Fungi	p__Ascomycota	c__Dothideomycetes	o__Dothideomycetidae_ord_Incertae_sedis	f__Eremomycetaceae	g__Arthrographis	s__unidentified_Arthrographis	New.CleanUp.ReferenceOTU119387
OTU4067	0	0	0	0	0	0	0	0	0	0	0	0	0	0	0	2	0	2	0	0	0	0	0	0	0	0	0	0	0	0	0	0	0	0	0	0	k__Fungi	p__Ascomycota	c__Dothideomycetes	o__Dothideomycetidae_ord_Incertae_sedis	f__Eremomycetaceae	g__Arthrographis	s__unidentified_Arthrographis	SH025356.07FU_EU139247_reps
OTU1585	0	0	0	0	0	0	0	0	0	0	0	0	0	0	0	0	0	0	0	0	0	0	0	0	0	2	0	0	0	0	0	0	0	0	0	0	k__Fungi	p__Ascomycota	c__Dothideomycetes	o__Dothideomycetidae_ord_Incertae_sedis	f__Eremomycetaceae	g__Arthrographis	s__unidentified_Arthrographis	New.CleanUp.ReferenceOTU103611
OTU6839	0	0	0	0	0	0	0	0	0	0	0	0	0	0	0	0	0	0	0	0	0	0	0	0	0	113	304	3	10	786	19	10	0	0	0	1	k__Fungi	p__Ascomycota	c__Dothideomycetes	o__Hysteriales	f__Gloniaceae	g__Cenococcum	s__unidentified_Cenococcum	New.ReferenceOTU636
OTU1487	0	0	0	0	0	0	0	0	0	0	0	0	0	0	0	0	0	0	0	0	0	0	0	0	2	0	0	0	0	0	0	0	0	0	0	0	k__Fungi	p__Ascomycota	c__Dothideomycetes	o__Hysteriales	f__Gloniaceae	g__Cenococcum	s__unidentified_Cenococcum	New.CleanUp.ReferenceOTU73930
OTU6773	51	80	9	24	2	0	0	0	0	0	0	0	231	34	212	0	45	110	280	2	0	1	0	0	0	181	0	0	44	1	0	0	0	0	0	0	k__Fungi	p__Ascomycota	c__Dothideomycetes	o__Hysteriales	f__Gloniaceae	g__Cenococcum	s__Cenococcum_geophilum	SH027498.07FU_HM488459_reps
OTU5068	0	0	0	0	0	0	0	0	0	0	0	0	0	0	0	0	0	0	0	0	0	0	0	0	0	22	0	0	5	0	0	0	0	0	0	0	k__Fungi	p__Ascomycota	c__Dothideomycetes	o__Hysteriales	f__Gloniaceae	g__Cenococcum	s__Cenococcum_geophilum	New.CleanUp.ReferenceOTU20474
OTU4380	0	0	0	0	0	0	0	0	0	0	0	0	12	0	0	0	0	0	0	0	0	0	0	0	0	0	0	0	0	0	0	0	0	0	0	0	k__Fungi	p__Ascomycota	c__Dothideomycetes	o__Hysteriales	f__Gloniaceae	g__Cenococcum	s__Cenococcum_geophilum	New.CleanUp.ReferenceOTU25865
OTU4300	0	0	1	0	0	0	0	0	0	0	0	0	0	0	0	0	0	1	0	0	0	0	0	0	2	1	0	0	4	0	1	1	0	0	0	0	k__Fungi	p__Ascomycota	c__Dothideomycetes	o__Hysteriales	f__Gloniaceae	g__Cenococcum	s__Cenococcum_geophilum	New.CleanUp.ReferenceOTU41014
OTU2474	0	0	0	0	0	0	0	0	0	0	0	0	0	0	0	0	0	0	0	0	0	0	0	0	1	0	0	0	1	0	1	0	0	0	0	0	k__Fungi	p__Ascomycota	c__Dothideomycetes	o__Hysteriales	f__Gloniaceae	g__Cenococcum	s__Cenococcum_geophilum	New.CleanUp.ReferenceOTU2059
OTU1318	0	0	0	0	2	0	0	0	0	0	0	0	0	0	0	0	0	0	0	0	0	0	0	0	0	0	0	0	0	0	0	0	0	0	0	0	k__Fungi	p__Ascomycota	c__Dothideomycetes	o__Hysteriales	f__Gloniaceae	g__Cenococcum	s__Cenococcum_geophilum	New.CleanUp.ReferenceOTU19580
OTU1560	0	0	1	0	0	0	0	0	0	0	0	0	0	0	0	0	0	0	0	0	0	0	0	1	0	0	0	0	0	0	0	0	0	0	0	0	k__Fungi	p__Ascomycota	c__Dothideomycetes	o__Hysteriales	f__Gloniaceae	g__Cenococcum	s__Cenococcum_geophilum	New.CleanUp.ReferenceOTU95037
OTU1615	0	0	0	0	0	0	0	0	0	0	0	0	0	0	0	0	0	1	1	0	0	0	0	0	0	0	0	0	0	0	0	0	0	0	0	0	k__Fungi	p__Ascomycota	c__Dothideomycetes	o__Hysteriales	f__Gloniaceae	g__Cenococcum	s__Cenococcum_geophilum	New.CleanUp.ReferenceOTU112084
OTU1628	0	0	0	0	0	0	0	0	0	0	0	0	0	0	0	0	0	0	0	0	0	0	0	0	0	0	0	1	0	0	1	0	0	0	0	0	k__Fungi	p__Ascomycota	c__Dothideomycetes	o__Hysteriales	f__Gloniaceae	g__Cenococcum	s__Cenococcum_geophilum	New.CleanUp.ReferenceOTU116931
OTU217	0	0	0	0	0	0	0	0	0	0	0	0	0	0	0	0	0	1	0	0	0	0	0	0	0	0	0	0	0	0	0	0	0	0	0	0	k__Fungi	p__Ascomycota	c__Dothideomycetes	o__Hysteriales	f__Gloniaceae	g__Cenococcum	s__Cenococcum_geophilum	New.CleanUp.ReferenceOTU22723
OTU242	0	0	0	0	0	0	0	0	0	0	0	0	0	0	0	0	0	0	0	0	0	0	0	0	0	0	0	1	0	0	0	0	0	0	0	0	k__Fungi	p__Ascomycota	c__Dothideomycetes	o__Hysteriales	f__Gloniaceae	g__Cenococcum	s__Cenococcum_geophilum	New.CleanUp.ReferenceOTU30445
OTU272	0	0	0	0	0	0	0	0	0	0	0	0	1	0	0	0	0	0	0	0	0	0	0	0	0	0	0	0	0	0	0	0	0	0	0	0	k__Fungi	p__Ascomycota	c__Dothideomycetes	o__Hysteriales	f__Gloniaceae	g__Cenococcum	s__Cenococcum_geophilum	New.CleanUp.ReferenceOTU41087
OTU309	0	0	0	0	0	0	0	0	0	0	0	0	0	0	0	0	0	0	0	0	0	0	0	0	0	0	0	0	1	0	0	0	0	0	0	0	k__Fungi	p__Ascomycota	c__Dothideomycetes	o__Hysteriales	f__Gloniaceae	g__Cenococcum	s__Cenococcum_geophilum	New.CleanUp.ReferenceOTU55118
OTU328	0	0	0	0	0	0	0	0	0	0	0	0	0	0	0	0	0	0	0	0	0	0	0	0	0	0	1	0	0	0	0	0	0	0	0	0	k__Fungi	p__Ascomycota	c__Dothideomycetes	o__Hysteriales	f__Gloniaceae	g__Cenococcum	s__Cenococcum_geophilum	New.CleanUp.ReferenceOTU59413
OTU356	0	0	0	0	0	0	0	0	0	0	0	0	0	0	1	0	0	0	0	0	0	0	0	0	0	0	0	0	0	0	0	0	0	0	0	0	k__Fungi	p__Ascomycota	c__Dothideomycetes	o__Hysteriales	f__Gloniaceae	g__Cenococcum	s__Cenococcum_geophilum	New.CleanUp.ReferenceOTU68632
OTU426	0	0	0	0	0	0	0	0	0	0	0	0	0	0	0	0	0	0	0	0	0	0	0	0	0	0	0	1	0	0	0	0	0	0	0	0	k__Fungi	p__Ascomycota	c__Dothideomycetes	o__Hysteriales	f__Gloniaceae	g__Cenococcum	s__Cenococcum_geophilum	New.CleanUp.ReferenceOTU88126
OTU1354	0	0	0	0	0	0	0	0	0	0	0	0	0	0	0	0	0	0	0	0	0	0	0	0	0	0	1	0	0	0	0	0	0	0	0	0	k__Fungi	p__Ascomycota	c__Dothideomycetes	o__Hysteriales	f__Gloniaceae	g__Cenococcum	s__Cenococcum_geophilum	New.CleanUp.ReferenceOTU30139
OTU1559	0	0	0	0	0	0	0	0	0	0	0	0	0	0	0	0	0	0	0	1	0	0	0	0	0	0	0	0	0	0	0	0	0	0	0	0	k__Fungi	p__Ascomycota	c__Dothideomycetes	o__Hysteriales	f__Gloniaceae	g__Cenococcum	s__Cenococcum_geophilum	New.CleanUp.ReferenceOTU94748
OTU1384	2	0	0	0	0	0	0	0	0	0	0	0	0	0	0	0	0	0	0	0	0	0	0	0	0	0	0	0	0	0	0	0	0	0	0	0	k__Fungi	p__Ascomycota	c__Dothideomycetes	o__Myriangiales	f__Myriangiaceae	g__Myriangium	s__unidentified_Myriangium	New.CleanUp.ReferenceOTU43247
OTU179	0	0	0	0	0	0	0	0	0	0	0	0	0	0	0	0	0	0	0	0	0	0	0	0	1	0	0	0	0	0	0	0	0	0	0	0	k__Fungi	p__Ascomycota	c__Dothideomycetes	o__Myriangiales	f__unidentified_Myriangiales	g__unidentified_Myriangiales	s__unidentified_Myriangiales	New.CleanUp.ReferenceOTU12173
OTU6993	454	74	302	273	20	16	116	430	794	173	42	63	2648	628	688	748	117	995	489	482	25	36	206	64	58	49	1	5	26	23	21	20	106	101	51	2	k__Fungi	p__Ascomycota	c__Dothideomycetes	o__Pleosporales	f__unidentified_Pleosporales	g__unidentified_Pleosporales	s__unidentified_Pleosporales	SH006608.07FU_AY943061_refs
OTU6784	13	4	18	17	0	22	15	17	4	6	65	115	53	32	15	20	8	35	17	21	25	28	1	0	14	13	6	95	18	20	35	59	78	53	18	56	k__Fungi	p__Ascomycota	c__Dothideomycetes	o__Pleosporales	f__unidentified_Pleosporales	g__unidentified_Pleosporales	s__unidentified_Pleosporales	SH016423.07FU_JF740262_refs
OTU6335	0	0	40	4	0	0	0	0	0	0	0	2	0	5	76	0	3	45	0	0	0	0	0	0	27	35	5	2	0	0	0	4	0	0	0	0	k__Fungi	p__Ascomycota	c__Dothideomycetes	o__Pleosporales	f__unidentified_Pleosporales	g__unidentified_Pleosporales	s__unidentified_Pleosporales	SH016464.07FU_HQ607848_reps
OTU6262	1	0	0	0	0	0	13	0	0	0	2	0	63	7	0	0	5	6	0	13	0	10	13	0	0	0	0	0	0	0	3	3	28	9	0	9	k__Fungi	p__Ascomycota	c__Dothideomycetes	o__Pleosporales	f__unidentified_Pleosporales	g__unidentified_Pleosporales	s__unidentified_Pleosporales	New.CleanUp.ReferenceOTU2233
OTU6180	6	0	6	2	0	3	18	2	0	2	0	13	10	0	10	5	0	0	1	0	0	0	0	0	1	3	2	19	6	18	1	6	3	2	0	1	k__Fungi	p__Ascomycota	c__Dothideomycetes	o__Pleosporales	f__unidentified_Pleosporales	g__unidentified_Pleosporales	s__unidentified_Pleosporales	New.ReferenceOTU860
OTU6057	4	2	8	0	1	2	1	0	4	0	0	44	0	0	0	0	0	0	0	0	3	2	0	0	1	0	0	0	19	0	0	2	0	0	28	1	k__Fungi	p__Ascomycota	c__Dothideomycetes	o__Pleosporales	f__unidentified_Pleosporales	g__unidentified_Pleosporales	s__unidentified_Pleosporales	New.CleanUp.ReferenceOTU83410
OTU5884	0	0	0	0	0	0	0	0	0	14	0	1	0	0	0	0	0	0	0	0	0	0	0	0	0	0	0	0	0	0	0	0	12	0	2	49	k__Fungi	p__Ascomycota	c__Dothideomycetes	o__Pleosporales	f__unidentified_Pleosporales	g__unidentified_Pleosporales	s__unidentified_Pleosporales	SH008348.07FU_JX624287_reps
OTU5724	0	0	0	9	0	0	0	0	0	0	0	0	11	0	0	6	0	2	7	8	0	0	0	0	2	5	0	0	1	0	0	2	4	0	0	0	k__Fungi	p__Ascomycota	c__Dothideomycetes	o__Pleosporales	f__unidentified_Pleosporales	g__unidentified_Pleosporales	s__unidentified_Pleosporales	New.CleanUp.ReferenceOTU101640
OTU5521	0	0	46	0	0	0	0	0	0	0	0	0	0	0	0	5	0	0	0	0	0	0	0	0	0	0	0	0	0	0	0	0	0	0	0	0	k__Fungi	p__Ascomycota	c__Dothideomycetes	o__Pleosporales	f__unidentified_Pleosporales	g__unidentified_Pleosporales	s__unidentified_Pleosporales	New.CleanUp.ReferenceOTU96011
OTU5447	0	0	0	0	0	0	0	0	0	0	0	0	11	0	0	0	0	33	0	0	0	0	0	0	0	0	1	0	0	0	0	0	0	0	0	0	k__Fungi	p__Ascomycota	c__Dothideomycetes	o__Pleosporales	f__unidentified_Pleosporales	g__unidentified_Pleosporales	s__unidentified_Pleosporales	New.CleanUp.ReferenceOTU105954
OTU5374	0	0	0	0	0	0	0	0	0	0	5	3	0	0	0	0	0	1	0	0	0	0	31	0	0	0	0	0	0	0	0	0	1	0	0	0	k__Fungi	p__Ascomycota	c__Dothideomycetes	o__Pleosporales	f__unidentified_Pleosporales	g__unidentified_Pleosporales	s__unidentified_Pleosporales	SH004390.07FU_JQ760106_reps_singleton
OTU5473	2	0	0	0	0	0	0	0	0	0	0	0	0	0	30	0	1	1	3	2	1	0	0	0	0	0	0	0	0	0	0	0	0	0	0	0	k__Fungi	p__Ascomycota	c__Dothideomycetes	o__Pleosporales	f__unidentified_Pleosporales	g__unidentified_Pleosporales	s__unidentified_Pleosporales	New.CleanUp.ReferenceOTU86355
OTU5514	0	0	0	0	0	0	0	0	0	0	0	2	0	0	0	1	0	0	0	0	1	9	0	23	0	0	0	0	2	0	0	0	1	0	0	0	k__Fungi	p__Ascomycota	c__Dothideomycetes	o__Pleosporales	f__unidentified_Pleosporales	g__unidentified_Pleosporales	s__unidentified_Pleosporales	SH022170.07FU_EU490036_reps
OTU5532	0	0	0	0	0	0	0	0	0	0	4	10	0	0	0	0	7	9	0	2	0	0	0	0	0	0	0	2	0	0	0	1	0	0	0	0	k__Fungi	p__Ascomycota	c__Dothideomycetes	o__Pleosporales	f__unidentified_Pleosporales	g__unidentified_Pleosporales	s__unidentified_Pleosporales	SH005750.07FU_EF619689_reps
OTU5343	18	0	2	0	0	0	2	0	0	0	0	0	0	5	0	3	0	0	0	0	2	0	0	0	0	0	0	0	0	0	0	0	0	0	0	0	k__Fungi	p__Ascomycota	c__Dothideomycetes	o__Pleosporales	f__unidentified_Pleosporales	g__unidentified_Pleosporales	s__unidentified_Pleosporales	SH497382.07FU_HG937143_reps_singleton
OTU4869	0	0	3	0	0	0	0	0	0	0	0	0	0	1	0	0	0	0	0	1	0	0	0	0	2	0	0	0	5	7	0	0	0	0	0	0	k__Fungi	p__Ascomycota	c__Dothideomycetes	o__Pleosporales	f__unidentified_Pleosporales	g__unidentified_Pleosporales	s__unidentified_Pleosporales	New.CleanUp.ReferenceOTU76277
OTU4574	4	2	0	1	0	0	0	0	0	0	0	0	0	8	0	0	0	0	0	0	0	0	0	0	0	0	0	0	0	0	0	0	0	0	0	0	k__Fungi	p__Ascomycota	c__Dothideomycetes	o__Pleosporales	f__unidentified_Pleosporales	g__unidentified_Pleosporales	s__unidentified_Pleosporales	SH023258.07FU_HF947083_reps
OTU4540	0	0	2	6	0	0	0	0	0	0	0	0	0	0	0	0	0	0	0	3	0	0	0	0	0	0	0	0	3	0	0	0	0	0	0	0	k__Fungi	p__Ascomycota	c__Dothideomycetes	o__Pleosporales	f__unidentified_Pleosporales	g__unidentified_Pleosporales	s__unidentified_Pleosporales	New.CleanUp.ReferenceOTU103949
OTU4709	0	0	0	0	0	3	0	0	0	0	0	0	0	3	0	0	0	1	0	0	0	0	0	0	0	0	0	0	0	1	0	6	0	0	0	0	k__Fungi	p__Ascomycota	c__Dothideomycetes	o__Pleosporales	f__unidentified_Pleosporales	g__unidentified_Pleosporales	s__unidentified_Pleosporales	New.CleanUp.ReferenceOTU55709
OTU4939	0	0	0	0	0	0	0	0	0	0	0	13	0	0	0	0	0	0	0	0	0	0	0	0	0	0	0	0	0	0	0	0	0	0	0	0	k__Fungi	p__Ascomycota	c__Dothideomycetes	o__Pleosporales	f__unidentified_Pleosporales	g__unidentified_Pleosporales	s__unidentified_Pleosporales	New.CleanUp.ReferenceOTU79565
OTU4805	0	0	0	0	0	0	0	0	0	0	0	9	0	0	0	0	0	0	0	0	0	0	0	3	0	0	0	0	0	0	0	0	0	0	0	0	k__Fungi	p__Ascomycota	c__Dothideomycetes	o__Pleosporales	f__unidentified_Pleosporales	g__unidentified_Pleosporales	s__unidentified_Pleosporales	New.CleanUp.ReferenceOTU53057
OTU4276	0	0	0	0	0	0	0	0	0	0	0	0	0	0	0	0	0	0	0	0	0	0	11	0	0	0	0	0	0	0	0	0	0	0	0	0	k__Fungi	p__Ascomycota	c__Dothideomycetes	o__Pleosporales	f__unidentified_Pleosporales	g__unidentified_Pleosporales	s__unidentified_Pleosporales	SH020108.07FU_GU054285_reps
OTU4168	0	0	0	0	0	0	0	0	0	0	0	6	0	0	0	0	0	0	0	0	2	0	2	0	0	0	0	0	0	0	0	0	0	0	0	0	k__Fungi	p__Ascomycota	c__Dothideomycetes	o__Pleosporales	f__unidentified_Pleosporales	g__unidentified_Pleosporales	s__unidentified_Pleosporales	SH020114.07FU_GU054273_reps_singleton
OTU4968	0	0	0	0	0	0	0	0	0	0	0	0	0	2	0	1	0	0	0	0	0	0	0	0	1	1	0	0	3	0	0	2	0	0	0	0	k__Fungi	p__Ascomycota	c__Dothideomycetes	o__Pleosporales	f__unidentified_Pleosporales	g__unidentified_Pleosporales	s__unidentified_Pleosporales	SH030016.07FU_KJ591760_reps
OTU4746	0	0	0	0	0	0	0	0	0	0	0	0	1	0	2	3	0	0	3	0	0	0	0	0	0	0	0	0	0	0	0	0	0	0	0	0	k__Fungi	p__Ascomycota	c__Dothideomycetes	o__Pleosporales	f__unidentified_Pleosporales	g__unidentified_Pleosporales	s__unidentified_Pleosporales	SH006654.07FU_KF800419_reps_singleton
OTU3948	0	0	0	0	0	0	0	0	0	0	0	0	0	0	0	0	0	0	0	0	0	0	0	8	0	0	0	0	0	0	0	0	0	0	0	0	k__Fungi	p__Ascomycota	c__Dothideomycetes	o__Pleosporales	f__unidentified_Pleosporales	g__unidentified_Pleosporales	s__unidentified_Pleosporales	New.CleanUp.ReferenceOTU13485
OTU3959	0	0	0	0	0	0	0	0	0	0	0	5	0	0	0	0	0	0	0	0	0	0	0	0	0	0	0	0	0	0	0	0	1	0	1	1	k__Fungi	p__Ascomycota	c__Dothideomycetes	o__Pleosporales	f__unidentified_Pleosporales	g__unidentified_Pleosporales	s__unidentified_Pleosporales	New.CleanUp.ReferenceOTU41259
OTU3970	0	0	0	0	0	0	0	0	0	0	0	0	0	0	0	0	0	1	6	1	0	0	0	0	0	0	0	0	0	0	0	0	0	0	0	0	k__Fungi	p__Ascomycota	c__Dothideomycetes	o__Pleosporales	f__unidentified_Pleosporales	g__unidentified_Pleosporales	s__unidentified_Pleosporales	New.CleanUp.ReferenceOTU76510
OTU4375	7	0	0	0	0	0	0	0	0	0	0	0	0	0	0	0	0	0	0	0	0	0	0	0	0	0	0	0	0	0	0	0	0	0	0	0	k__Fungi	p__Ascomycota	c__Dothideomycetes	o__Pleosporales	f__unidentified_Pleosporales	g__unidentified_Pleosporales	s__unidentified_Pleosporales	SH020694.07FU_KC339248_reps
OTU4646	0	0	1	0	0	0	0	0	0	0	0	0	3	0	0	0	0	3	0	0	0	0	0	0	0	0	0	0	0	0	0	0	0	0	0	0	k__Fungi	p__Ascomycota	c__Dothideomycetes	o__Pleosporales	f__unidentified_Pleosporales	g__unidentified_Pleosporales	s__unidentified_Pleosporales	New.CleanUp.ReferenceOTU62516
OTU3598	0	0	0	0	0	0	0	0	0	0	0	0	0	0	0	0	0	0	0	0	0	0	0	0	0	0	0	0	0	0	6	0	0	0	0	0	k__Fungi	p__Ascomycota	c__Dothideomycetes	o__Pleosporales	f__unidentified_Pleosporales	g__unidentified_Pleosporales	s__unidentified_Pleosporales	SH008367.07FU_FJ481946_reps_singleton
OTU3360	0	0	0	0	0	0	0	0	0	0	0	0	0	5	0	0	0	0	0	0	0	0	0	0	0	0	0	0	0	0	0	0	0	0	0	0	k__Fungi	p__Ascomycota	c__Dothideomycetes	o__Pleosporales	f__unidentified_Pleosporales	g__unidentified_Pleosporales	s__unidentified_Pleosporales	SH022162.07FU_KP183983_refs
OTU3044	1	0	0	0	0	0	0	0	0	0	0	0	0	0	0	1	0	0	0	0	0	0	1	0	0	1	0	0	0	0	0	0	0	0	0	0	k__Fungi	p__Ascomycota	c__Dothideomycetes	o__Pleosporales	f__unidentified_Pleosporales	g__unidentified_Pleosporales	s__unidentified_Pleosporales	New.CleanUp.ReferenceOTU31699
OTU3105	0	0	0	0	0	0	0	0	0	0	0	0	4	0	0	0	0	0	0	0	0	0	0	0	0	0	0	0	0	0	0	0	0	0	0	0	k__Fungi	p__Ascomycota	c__Dothideomycetes	o__Pleosporales	f__unidentified_Pleosporales	g__unidentified_Pleosporales	s__unidentified_Pleosporales	New.CleanUp.ReferenceOTU93334
OTU3112	0	0	0	0	0	0	0	0	0	0	0	4	0	0	0	0	0	0	0	0	0	0	0	0	0	0	0	0	0	0	0	0	0	0	0	0	k__Fungi	p__Ascomycota	c__Dothideomycetes	o__Pleosporales	f__unidentified_Pleosporales	g__unidentified_Pleosporales	s__unidentified_Pleosporales	New.CleanUp.ReferenceOTU98796
OTU3391	0	0	0	0	0	0	0	0	0	0	0	0	0	0	3	0	0	1	0	0	0	0	0	0	0	0	0	0	0	0	0	0	0	0	0	0	k__Fungi	p__Ascomycota	c__Dothideomycetes	o__Pleosporales	f__unidentified_Pleosporales	g__unidentified_Pleosporales	s__unidentified_Pleosporales	New.CleanUp.ReferenceOTU42696
OTU2487	0	0	0	0	0	0	0	0	0	0	0	0	0	0	0	3	0	0	0	0	0	0	0	0	0	0	0	0	0	0	0	0	0	0	0	0	k__Fungi	p__Ascomycota	c__Dothideomycetes	o__Pleosporales	f__unidentified_Pleosporales	g__unidentified_Pleosporales	s__unidentified_Pleosporales	New.CleanUp.ReferenceOTU12524
OTU2495	3	0	0	0	0	0	0	0	0	0	0	0	0	0	0	0	0	0	0	0	0	0	0	0	0	0	0	0	0	0	0	0	0	0	0	0	k__Fungi	p__Ascomycota	c__Dothideomycetes	o__Pleosporales	f__unidentified_Pleosporales	g__unidentified_Pleosporales	s__unidentified_Pleosporales	New.CleanUp.ReferenceOTU16205
OTU2535	0	0	0	0	0	0	0	0	0	0	0	0	0	0	0	0	0	3	0	0	0	0	0	0	0	0	0	0	0	0	0	0	0	0	0	0	k__Fungi	p__Ascomycota	c__Dothideomycetes	o__Pleosporales	f__unidentified_Pleosporales	g__unidentified_Pleosporales	s__unidentified_Pleosporales	New.CleanUp.ReferenceOTU37246
OTU2555	0	0	0	0	0	0	0	0	0	0	0	0	0	0	0	0	0	0	0	0	0	0	0	0	0	0	0	0	0	0	2	1	0	0	0	0	k__Fungi	p__Ascomycota	c__Dothideomycetes	o__Pleosporales	f__unidentified_Pleosporales	g__unidentified_Pleosporales	s__unidentified_Pleosporales	New.CleanUp.ReferenceOTU57120
OTU2635	0	3	0	0	0	0	0	0	0	0	0	0	0	0	0	0	0	0	0	0	0	0	0	0	0	0	0	0	0	0	0	0	0	0	0	0	k__Fungi	p__Ascomycota	c__Dothideomycetes	o__Pleosporales	f__unidentified_Pleosporales	g__unidentified_Pleosporales	s__unidentified_Pleosporales	New.CleanUp.ReferenceOTU115787
OTU3060	0	0	0	0	0	0	0	2	0	0	0	0	0	0	1	0	0	0	0	0	0	0	0	0	0	0	0	0	0	0	0	0	0	0	0	0	k__Fungi	p__Ascomycota	c__Dothideomycetes	o__Pleosporales	f__unidentified_Pleosporales	g__unidentified_Pleosporales	s__unidentified_Pleosporales	New.CleanUp.ReferenceOTU46982
OTU3070	0	0	0	0	0	0	0	0	0	0	0	2	0	0	0	0	0	0	0	0	0	1	0	0	0	0	0	0	0	0	0	0	0	0	0	0	k__Fungi	p__Ascomycota	c__Dothideomycetes	o__Pleosporales	f__unidentified_Pleosporales	g__unidentified_Pleosporales	s__unidentified_Pleosporales	New.CleanUp.ReferenceOTU59726
OTU3075	0	0	0	1	0	0	0	0	0	0	0	0	0	0	0	0	0	0	0	0	0	0	0	0	1	0	0	0	0	0	1	0	0	0	0	0	k__Fungi	p__Ascomycota	c__Dothideomycetes	o__Pleosporales	f__unidentified_Pleosporales	g__unidentified_Pleosporales	s__unidentified_Pleosporales	New.CleanUp.ReferenceOTU64453
OTU1196	0	0	0	0	0	0	0	0	0	0	0	0	0	0	0	0	0	0	0	0	0	0	0	0	0	0	1	1	0	0	0	0	0	0	0	0	k__Fungi	p__Ascomycota	c__Dothideomycetes	o__Pleosporales	f__unidentified_Pleosporales	g__unidentified_Pleosporales	s__unidentified_Pleosporales	SH011797.07FU_JF740181_reps
OTU1216	0	0	0	0	0	0	0	0	0	0	0	0	0	0	0	0	0	0	0	0	2	0	0	0	0	0	0	0	0	0	0	0	0	0	0	0	k__Fungi	p__Ascomycota	c__Dothideomycetes	o__Pleosporales	f__unidentified_Pleosporales	g__unidentified_Pleosporales	s__unidentified_Pleosporales	SH022165.07FU_JQ070592_reps
OTU1275	0	0	0	0	0	0	0	0	0	0	2	0	0	0	0	0	0	0	0	0	0	0	0	0	0	0	0	0	0	0	0	0	0	0	0	0	k__Fungi	p__Ascomycota	c__Dothideomycetes	o__Pleosporales	f__unidentified_Pleosporales	g__unidentified_Pleosporales	s__unidentified_Pleosporales	New.CleanUp.ReferenceOTU3847
OTU1457	0	0	0	0	0	0	0	0	0	0	0	0	0	0	0	2	0	0	0	0	0	0	0	0	0	0	0	0	0	0	0	0	0	0	0	0	k__Fungi	p__Ascomycota	c__Dothideomycetes	o__Pleosporales	f__unidentified_Pleosporales	g__unidentified_Pleosporales	s__unidentified_Pleosporales	New.CleanUp.ReferenceOTU66191
OTU1462	0	0	0	2	0	0	0	0	0	0	0	0	0	0	0	0	0	0	0	0	0	0	0	0	0	0	0	0	0	0	0	0	0	0	0	0	k__Fungi	p__Ascomycota	c__Dothideomycetes	o__Pleosporales	f__unidentified_Pleosporales	g__unidentified_Pleosporales	s__unidentified_Pleosporales	New.CleanUp.ReferenceOTU68069
OTU1470	0	0	0	0	0	0	0	0	0	0	0	0	0	0	0	0	0	2	0	0	0	0	0	0	0	0	0	0	0	0	0	0	0	0	0	0	k__Fungi	p__Ascomycota	c__Dothideomycetes	o__Pleosporales	f__unidentified_Pleosporales	g__unidentified_Pleosporales	s__unidentified_Pleosporales	New.CleanUp.ReferenceOTU70199
OTU1475	2	0	0	0	0	0	0	0	0	0	0	0	0	0	0	0	0	0	0	0	0	0	0	0	0	0	0	0	0	0	0	0	0	0	0	0	k__Fungi	p__Ascomycota	c__Dothideomycetes	o__Pleosporales	f__unidentified_Pleosporales	g__unidentified_Pleosporales	s__unidentified_Pleosporales	New.CleanUp.ReferenceOTU71411
OTU1516	0	0	0	0	0	0	0	0	0	0	0	0	0	0	0	0	0	2	0	0	0	0	0	0	0	0	0	0	0	0	0	0	0	0	0	0	k__Fungi	p__Ascomycota	c__Dothideomycetes	o__Pleosporales	f__unidentified_Pleosporales	g__unidentified_Pleosporales	s__unidentified_Pleosporales	New.CleanUp.ReferenceOTU81220
OTU1549	0	0	0	0	0	0	0	0	1	0	0	0	1	0	0	0	0	0	0	0	0	0	0	0	0	0	0	0	0	0	0	0	0	0	0	0	k__Fungi	p__Ascomycota	c__Dothideomycetes	o__Pleosporales	f__unidentified_Pleosporales	g__unidentified_Pleosporales	s__unidentified_Pleosporales	New.CleanUp.ReferenceOTU92377
OTU1606	0	0	0	0	0	0	0	0	0	0	0	0	2	0	0	0	0	0	0	0	0	0	0	0	0	0	0	0	0	0	0	0	0	0	0	0	k__Fungi	p__Ascomycota	c__Dothideomycetes	o__Pleosporales	f__unidentified_Pleosporales	g__unidentified_Pleosporales	s__unidentified_Pleosporales	New.CleanUp.ReferenceOTU110149
OTU1610	0	0	0	0	0	0	0	0	0	0	0	0	1	0	0	0	0	0	0	0	0	0	0	0	0	0	0	0	0	0	0	0	1	0	0	0	k__Fungi	p__Ascomycota	c__Dothideomycetes	o__Pleosporales	f__unidentified_Pleosporales	g__unidentified_Pleosporales	s__unidentified_Pleosporales	New.CleanUp.ReferenceOTU111081
OTU99	0	0	0	0	0	0	0	0	0	0	0	0	0	0	0	0	0	0	0	0	0	0	0	0	0	1	0	0	0	0	0	0	0	0	0	0	k__Fungi	p__Ascomycota	c__Dothideomycetes	o__Pleosporales	f__unidentified_Pleosporales	g__unidentified_Pleosporales	s__unidentified_Pleosporales	SH008359.07FU_GQ921796_reps_singleton
OTU141	0	0	1	0	0	0	0	0	0	0	0	0	0	0	0	0	0	0	0	0	0	0	0	0	0	0	0	0	0	0	0	0	0	0	0	0	k__Fungi	p__Ascomycota	c__Dothideomycetes	o__Pleosporales	f__unidentified_Pleosporales	g__unidentified_Pleosporales	s__unidentified_Pleosporales	New.CleanUp.ReferenceOTU1791
OTU158	0	0	0	0	0	0	0	0	0	0	0	0	1	0	0	0	0	0	0	0	0	0	0	0	0	0	0	0	0	0	0	0	0	0	0	0	k__Fungi	p__Ascomycota	c__Dothideomycetes	o__Pleosporales	f__unidentified_Pleosporales	g__unidentified_Pleosporales	s__unidentified_Pleosporales	New.CleanUp.ReferenceOTU5503
OTU181	0	0	0	0	0	0	0	0	0	0	0	0	0	0	0	0	0	1	0	0	0	0	0	0	0	0	0	0	0	0	0	0	0	0	0	0	k__Fungi	p__Ascomycota	c__Dothideomycetes	o__Pleosporales	f__unidentified_Pleosporales	g__unidentified_Pleosporales	s__unidentified_Pleosporales	New.CleanUp.ReferenceOTU12673
OTU288	0	0	0	0	0	0	0	0	0	0	0	0	0	0	1	0	0	0	0	0	0	0	0	0	0	0	0	0	0	0	0	0	0	0	0	0	k__Fungi	p__Ascomycota	c__Dothideomycetes	o__Pleosporales	f__unidentified_Pleosporales	g__unidentified_Pleosporales	s__unidentified_Pleosporales	New.CleanUp.ReferenceOTU47178
OTU421	0	0	0	0	0	0	0	0	1	0	0	0	0	0	0	0	0	0	0	0	0	0	0	0	0	0	0	0	0	0	0	0	0	0	0	0	k__Fungi	p__Ascomycota	c__Dothideomycetes	o__Pleosporales	f__unidentified_Pleosporales	g__unidentified_Pleosporales	s__unidentified_Pleosporales	New.CleanUp.ReferenceOTU86115
OTU428	0	0	0	1	0	0	0	0	0	0	0	0	0	0	0	0	0	0	0	0	0	0	0	0	0	0	0	0	0	0	0	0	0	0	0	0	k__Fungi	p__Ascomycota	c__Dothideomycetes	o__Pleosporales	f__unidentified_Pleosporales	g__unidentified_Pleosporales	s__unidentified_Pleosporales	New.CleanUp.ReferenceOTU89421
OTU456	0	0	0	0	0	0	0	1	0	0	0	0	0	0	0	0	0	0	0	0	0	0	0	0	0	0	0	0	0	0	0	0	0	0	0	0	k__Fungi	p__Ascomycota	c__Dothideomycetes	o__Pleosporales	f__unidentified_Pleosporales	g__unidentified_Pleosporales	s__unidentified_Pleosporales	New.CleanUp.ReferenceOTU97723
OTU490	0	0	0	0	0	0	0	0	0	0	0	0	0	1	0	0	0	0	0	0	0	0	0	0	0	0	0	0	0	0	0	0	0	0	0	0	k__Fungi	p__Ascomycota	c__Dothideomycetes	o__Pleosporales	f__unidentified_Pleosporales	g__unidentified_Pleosporales	s__unidentified_Pleosporales	New.CleanUp.ReferenceOTU107410
OTU492	0	0	0	0	0	0	0	0	0	0	0	0	0	0	0	0	0	0	0	0	0	0	0	0	1	0	0	0	0	0	0	0	0	0	0	0	k__Fungi	p__Ascomycota	c__Dothideomycetes	o__Pleosporales	f__unidentified_Pleosporales	g__unidentified_Pleosporales	s__unidentified_Pleosporales	New.CleanUp.ReferenceOTU107830
OTU546	0	0	0	0	0	1	0	0	0	0	0	0	0	0	0	0	0	0	0	0	0	0	0	0	0	0	0	0	0	0	0	0	0	0	0	0	k__Fungi	p__Ascomycota	c__Dothideomycetes	o__Pleosporales	f__unidentified_Pleosporales	g__unidentified_Pleosporales	s__unidentified_Pleosporales	New.CleanUp.ReferenceOTU122444
OTU1398	0	0	0	0	0	0	0	0	0	0	0	0	0	0	0	0	1	0	0	0	0	0	0	0	0	0	0	0	0	0	0	0	0	0	0	0	k__Fungi	p__Ascomycota	c__Dothideomycetes	o__Pleosporales	f__unidentified_Pleosporales	g__unidentified_Pleosporales	s__unidentified_Pleosporales	New.CleanUp.ReferenceOTU48433
OTU1452	0	0	1	0	0	0	0	0	0	0	0	0	0	0	0	0	0	0	0	0	0	0	0	0	0	0	0	0	0	0	0	0	0	0	0	0	k__Fungi	p__Ascomycota	c__Dothideomycetes	o__Pleosporales	f__unidentified_Pleosporales	g__unidentified_Pleosporales	s__unidentified_Pleosporales	New.CleanUp.ReferenceOTU64755
OTU1525	0	0	0	0	0	0	0	0	0	0	0	0	0	0	0	0	0	0	1	0	0	0	0	0	0	0	0	0	0	0	0	0	0	0	0	0	k__Fungi	p__Ascomycota	c__Dothideomycetes	o__Pleosporales	f__unidentified_Pleosporales	g__unidentified_Pleosporales	s__unidentified_Pleosporales	New.CleanUp.ReferenceOTU83483
OTU2591	0	0	0	0	0	0	0	1	0	0	0	0	0	0	0	0	0	0	0	0	0	0	0	0	0	0	0	0	0	0	0	0	0	0	0	0	k__Fungi	p__Ascomycota	c__Dothideomycetes	o__Pleosporales	f__unidentified_Pleosporales	g__unidentified_Pleosporales	s__unidentified_Pleosporales	New.CleanUp.ReferenceOTU83371
OTU3602	0	0	0	0	0	0	0	0	0	0	0	0	0	0	0	0	0	0	0	0	0	0	0	0	0	0	0	0	1	0	0	0	0	0	0	0	k__Fungi	p__Ascomycota	c__Dothideomycetes	o__Pleosporales	f__unidentified_Pleosporales	g__unidentified_Pleosporales	s__unidentified_Pleosporales	SH008134.07FU_JQ936163_reps_singleton
OTU3098	4	0	0	0	0	0	0	0	0	0	0	0	0	0	0	0	0	0	0	0	0	0	0	0	0	0	0	0	0	0	0	0	0	0	0	0	k__Fungi	p__Ascomycota	c__Dothideomycetes	o__Pleosporales	f__Dacampiaceae	g__Teichospora	s__unidentified_Teichospora	New.CleanUp.ReferenceOTU83853
OTU3803	0	0	0	0	0	0	0	0	0	0	0	0	0	0	0	0	0	2	0	0	0	0	0	0	0	0	0	0	0	0	0	0	0	0	0	0	k__Fungi	p__Ascomycota	c__Dothideomycetes	o__Pleosporales	f__Dacampiaceae	g__Teichospora	s__Teichospora_trabicola	New.CleanUp.ReferenceOTU71703
OTU2988	0	0	0	0	0	3	0	0	0	0	0	0	0	0	0	0	0	0	0	0	0	0	0	0	0	0	0	1	0	0	0	0	0	0	0	0	k__Fungi	p__Ascomycota	c__Dothideomycetes	o__Pleosporales	f__Didymellaceae	g__Neoascochyta	s__unidentified_Neoascochyta	SH028498.07FU_FJ427048_refs
OTU6399	0	0	0	0	1	0	0	66	0	0	0	0	0	0	0	0	0	0	0	0	57	170	23	0	0	0	0	0	0	0	0	0	0	0	0	0	k__Fungi	p__Ascomycota	c__Dothideomycetes	o__Pleosporales	f__Didymosphaeriaceae	g__Didymosphaeria	s__unidentified_Didymosphaeria	SH015428.07FU_JX043137_reps
OTU1335	0	0	0	0	0	0	0	0	0	0	0	0	0	0	0	0	0	0	0	0	0	2	0	0	0	0	0	0	0	0	0	0	0	0	0	0	k__Fungi	p__Ascomycota	c__Dothideomycetes	o__Pleosporales	f__Didymosphaeriaceae	g__Didymosphaeria	s__unidentified_Didymosphaeria	New.CleanUp.ReferenceOTU25283
OTU314	0	0	0	0	0	0	0	0	0	0	0	0	0	0	1	0	0	0	0	0	0	0	0	0	0	0	0	0	0	0	0	0	0	0	0	0	k__Fungi	p__Ascomycota	c__Dothideomycetes	o__Pleosporales	f__Didymosphaeriaceae	g__Didymosphaeria	s__unidentified_Didymosphaeria	New.CleanUp.ReferenceOTU56490
OTU5194	0	0	0	0	0	0	0	0	0	3	0	0	9	0	0	0	0	0	0	0	6	5	0	0	0	0	0	0	0	0	0	0	6	0	0	0	k__Fungi	p__Ascomycota	c__Dothideomycetes	o__Pleosporales	f__Lentitheciaceae	g__Flavomyces	s__Flavomyces_fulophazii	New.CleanUp.ReferenceOTU21751
OTU4860	0	0	0	0	0	0	1	0	0	0	0	0	0	0	0	0	0	11	3	0	0	0	0	0	0	0	0	0	0	0	0	0	0	0	0	6	k__Fungi	p__Ascomycota	c__Dothideomycetes	o__Pleosporales	f__Leptosphaeriaceae	g__unidentified_Leptosphaeriaceae	s__unidentified_Leptosphaeriaceae	SH020636.07FU_HM439521_reps
OTU5041	0	0	26	0	0	0	0	0	0	0	0	0	0	0	0	0	0	0	0	0	0	0	0	0	0	0	0	0	0	0	0	0	0	0	0	0	k__Fungi	p__Ascomycota	c__Dothideomycetes	o__Pleosporales	f__Leptosphaeriaceae	g__Leptosphaeria	s__Leptosphaeria_sclerotioides	New.CleanUp.ReferenceOTU11766
OTU1211	0	0	2	0	0	0	0	0	0	0	0	0	0	0	0	0	0	0	0	0	0	0	0	0	0	0	0	0	0	0	0	0	0	0	0	0	k__Fungi	p__Ascomycota	c__Dothideomycetes	o__Pleosporales	f__Leptosphaeriaceae	g__Leptosphaeria	s__Leptosphaeria_sclerotioides	SH021543.07FU_JF740192_refs
OTU2464	0	0	3	0	0	0	0	0	0	0	0	0	0	0	0	0	0	0	0	0	0	0	0	0	0	0	0	0	0	0	0	0	0	0	0	0	k__Fungi	p__Ascomycota	c__Dothideomycetes	o__Pleosporales	f__Leptosphaeriaceae	g__Leptosphaeria	s__unidentified_Leptosphaeria	SH021552.07FU_FJ552958_reps_singleton
OTU5150	0	0	0	0	0	0	0	0	0	0	0	0	24	0	0	0	0	0	6	0	0	0	0	0	0	0	0	0	0	0	0	0	0	0	0	0	k__Fungi	p__Ascomycota	c__Dothideomycetes	o__Pleosporales	f__Lindgomycetaceae	g__Lindgomyces	s__Lindgomyces_apiculatus	New.CleanUp.ReferenceOTU88880
OTU4522	0	0	0	0	0	0	0	0	0	0	0	0	0	14	0	0	0	0	0	0	0	0	0	0	0	0	0	0	0	0	0	0	0	0	0	0	k__Fungi	p__Ascomycota	c__Dothideomycetes	o__Pleosporales	f__Lophiostomataceae	g__unidentified_Lophiostomataceae	s__unidentified_Lophiostomataceae	SH004338.07FU_LC001726_refs
OTU4531	6	0	0	0	0	0	0	0	0	0	0	0	0	0	5	0	0	0	0	0	0	0	0	0	0	1	0	0	0	0	0	2	0	0	0	0	k__Fungi	p__Ascomycota	c__Dothideomycetes	o__Pleosporales	f__Lophiostomataceae	g__unidentified_Lophiostomataceae	s__unidentified_Lophiostomataceae	New.ReferenceOTU238
OTU3589	0	0	0	0	0	0	0	0	0	0	0	0	0	4	0	0	0	0	0	0	0	0	0	0	0	0	0	0	0	0	0	0	0	0	0	0	k__Fungi	p__Ascomycota	c__Dothideomycetes	o__Pleosporales	f__Lophiostomataceae	g__unidentified_Lophiostomataceae	s__unidentified_Lophiostomataceae	SH016463.07FU_KP899132_refs
OTU115	0	0	0	0	0	0	0	0	0	0	0	0	0	0	1	0	0	0	0	0	0	0	0	0	0	0	0	0	0	0	0	0	0	0	0	0	k__Fungi	p__Ascomycota	c__Dothideomycetes	o__Pleosporales	f__Lophiostomataceae	g__unidentified_Lophiostomataceae	s__unidentified_Lophiostomataceae	SH004341.07FU_LC001728_refs
OTU4712	0	0	0	0	0	0	0	0	0	0	0	0	0	0	0	0	0	0	0	0	0	0	0	1	0	0	0	0	0	0	0	0	0	0	0	0	k__Fungi	p__Ascomycota	c__Dothideomycetes	o__Pleosporales	f__Lophiostomataceae	g__unidentified_Lophiostomataceae	s__unidentified_Lophiostomataceae	New.CleanUp.ReferenceOTU72672
OTU6204	0	0	175	0	0	0	0	0	0	0	0	0	0	0	0	0	0	0	0	1	0	0	0	0	0	0	0	0	0	0	0	0	0	0	0	0	k__Fungi	p__Ascomycota	c__Dothideomycetes	o__Pleosporales	f__Lophiostomataceae	g__Acrocalymma	s__unidentified_Acrocalymma	New.CleanUp.ReferenceOTU105746
OTU2459	0	0	3	0	0	0	0	0	0	0	0	0	0	0	0	0	0	0	0	0	0	0	0	0	0	0	0	0	0	0	0	0	0	0	0	0	k__Fungi	p__Ascomycota	c__Dothideomycetes	o__Pleosporales	f__Lophiostomataceae	g__Acrocalymma	s__unidentified_Acrocalymma	SH018134.07FU_AF383965_reps
OTU5432	0	0	1	0	0	0	0	0	0	0	0	0	0	5	1	1	3	7	0	0	0	0	0	0	0	8	0	0	0	0	0	8	0	0	0	0	k__Fungi	p__Ascomycota	c__Dothideomycetes	o__Pleosporales	f__Lophiostomataceae	g__Lophiostoma	s__Lophiostoma_cynaroidis	New.CleanUp.ReferenceOTU85104
OTU4654	0	0	0	1	0	0	0	0	0	0	0	0	0	2	1	11	0	0	0	0	0	0	0	0	0	0	0	0	0	0	0	0	0	0	0	0	k__Fungi	p__Ascomycota	c__Dothideomycetes	o__Pleosporales	f__Lophiostomataceae	g__Lophiostoma	s__unidentified_Lophiostoma	New.CleanUp.ReferenceOTU111413
OTU300	0	0	1	0	0	0	0	0	0	0	0	0	0	0	0	0	0	0	0	0	0	0	0	0	0	0	0	0	0	0	0	0	0	0	0	0	k__Fungi	p__Ascomycota	c__Dothideomycetes	o__Pleosporales	f__Lophiostomataceae	g__Lophiostoma	s__unidentified_Lophiostoma	New.CleanUp.ReferenceOTU51202
OTU534	0	0	0	0	0	0	0	0	0	0	0	0	0	0	0	0	0	0	0	0	0	0	0	0	0	1	0	0	0	0	0	0	0	0	0	0	k__Fungi	p__Ascomycota	c__Dothideomycetes	o__Pleosporales	f__Lophiostomataceae	g__Lophiostoma	s__unidentified_Lophiostoma	New.CleanUp.ReferenceOTU119233
OTU6053	0	0	143	0	0	0	0	0	0	0	0	0	0	0	0	0	0	0	0	0	0	0	0	0	0	0	0	0	0	0	0	0	0	0	0	0	k__Fungi	p__Ascomycota	c__Dothideomycetes	o__Pleosporales	f__Montagnulaceae	g__Paraconiothyrium	s__unidentified_Paraconiothyrium	New.CleanUp.ReferenceOTU67620
OTU4462	0	0	2	0	0	0	0	0	0	0	0	0	0	4	0	0	0	0	0	0	0	0	0	0	0	0	0	0	0	0	0	0	0	0	0	0	k__Fungi	p__Ascomycota	c__Dothideomycetes	o__Pleosporales	f__Phaeosphaeriaceae	g__unidentified_Phaeosphaeriaceae	s__unidentified_Phaeosphaeriaceae	New.CleanUp.ReferenceOTU7528
OTU3417	0	0	0	0	0	0	0	0	0	0	0	0	0	0	0	5	0	0	0	0	0	0	0	0	0	0	0	0	0	0	0	0	0	0	0	0	k__Fungi	p__Ascomycota	c__Dothideomycetes	o__Pleosporales	f__Phaeosphaeriaceae	g__unidentified_Phaeosphaeriaceae	s__unidentified_Phaeosphaeriaceae	New.CleanUp.ReferenceOTU84145
OTU2971	0	0	3	0	0	0	0	0	0	0	0	0	0	0	0	0	0	0	0	0	0	0	0	0	0	0	0	0	0	0	0	0	0	0	0	0	k__Fungi	p__Ascomycota	c__Dothideomycetes	o__Pleosporales	f__Phaeosphaeriaceae	g__unidentified_Phaeosphaeriaceae	s__unidentified_Phaeosphaeriaceae	SH491965.07FU_HG937140_reps_singleton
OTU1353	0	0	0	0	0	0	0	0	0	0	0	0	0	0	0	0	0	0	0	0	0	0	0	0	0	0	0	0	0	0	1	0	0	0	0	0	k__Fungi	p__Ascomycota	c__Dothideomycetes	o__Pleosporales	f__Phaeosphaeriaceae	g__unidentified_Phaeosphaeriaceae	s__unidentified_Phaeosphaeriaceae	New.CleanUp.ReferenceOTU30106
OTU6508	8	4	23	5	2	1	2	0	25	23	0	7	12	29	17	2	21	9	44	5	6	0	4	1	0	1	1	0	0	3	10	1	26	9	8	5	k__Fungi	p__Ascomycota	c__Dothideomycetes	o__Pleosporales	f__Phaeosphaeriaceae	g__Ophiosphaerella	s__unidentified_Ophiosphaerella	SH005822.07FU_FN392311_reps
OTU2451	0	0	0	0	0	0	0	0	0	0	0	0	0	0	0	0	0	0	0	0	0	0	0	0	0	0	0	0	0	0	0	0	0	0	0	3	k__Fungi	p__Ascomycota	c__Dothideomycetes	o__Pleosporales	f__Phaeosphaeriaceae	g__Ophiosphaerella	s__unidentified_Ophiosphaerella	SH005858.07FU_EU516981_reps_singleton
OTU4899	0	1	0	0	0	0	0	0	0	0	0	0	0	0	0	0	0	4	0	0	0	0	0	0	0	0	0	0	0	0	0	0	0	0	0	0	k__Fungi	p__Ascomycota	c__Dothideomycetes	o__Pleosporales	f__Phaeosphaeriaceae	g__Parastagonospora	s__unidentified_Parastagonospora	New.CleanUp.ReferenceOTU46796
OTU4480	0	1	1	0	0	0	0	0	0	0	0	0	0	0	0	0	0	0	0	0	0	0	0	0	0	0	0	0	1	0	0	0	0	0	0	0	k__Fungi	p__Ascomycota	c__Dothideomycetes	o__Pleosporales	f__Phaeosphaeriaceae	g__Parastagonospora	s__unidentified_Parastagonospora	New.CleanUp.ReferenceOTU114366
OTU4209	0	0	2	0	0	0	0	0	0	1	0	0	0	0	0	0	1	1	0	3	0	0	0	0	0	2	0	0	0	0	0	0	0	0	0	0	k__Fungi	p__Ascomycota	c__Dothideomycetes	o__Pleosporales	f__Phaeosphaeriaceae	g__Phaeosphaeria	s__unidentified_Phaeosphaeria	New.CleanUp.ReferenceOTU103913
OTU4072	0	0	0	0	0	0	0	0	0	0	4	0	0	5	0	0	0	0	0	0	0	0	0	0	0	0	0	0	0	0	0	0	0	0	0	0	k__Fungi	p__Ascomycota	c__Dothideomycetes	o__Pleosporales	f__Phaeosphaeriaceae	g__Phaeosphaeria	s__unidentified_Phaeosphaeria	SH023259.07FU_FR864988_reps
OTU4208	0	0	0	0	0	0	0	0	0	0	0	0	0	0	0	0	0	0	0	0	0	0	0	0	0	0	0	9	0	0	0	0	0	0	0	0	k__Fungi	p__Ascomycota	c__Dothideomycetes	o__Pleosporales	f__Phaeosphaeriaceae	g__Phaeosphaeria	s__unidentified_Phaeosphaeria	New.CleanUp.ReferenceOTU102329
OTU5833	1	0	0	4	0	14	0	0	0	0	0	0	0	18	7	0	0	6	0	13	0	0	1	4	0	0	1	9	0	0	0	0	0	0	0	0	k__Fungi	p__Ascomycota	c__Dothideomycetes	o__Pleosporales	f__Phaeosphaeriaceae	g__Stagonospora	s__unidentified_Stagonospora	New.CleanUp.ReferenceOTU84680
OTU3954	0	0	0	0	0	0	0	0	0	0	0	0	0	0	0	0	0	0	0	0	0	0	7	0	0	0	0	0	0	0	0	0	1	0	0	0	k__Fungi	p__Ascomycota	c__Dothideomycetes	o__Pleosporales	f__Phaeosphaeriaceae	g__Stagonospora	s__unidentified_Stagonospora	New.CleanUp.ReferenceOTU26920
OTU2639	0	0	0	0	0	0	0	0	0	0	0	0	0	0	0	0	0	3	0	0	0	0	0	0	0	0	0	0	0	0	0	0	0	0	0	0	k__Fungi	p__Ascomycota	c__Dothideomycetes	o__Pleosporales	f__Phaeosphaeriaceae	g__Stagonospora	s__unidentified_Stagonospora	New.CleanUp.ReferenceOTU117207
OTU1541	0	0	0	0	0	0	0	0	0	0	0	0	0	0	0	0	0	0	0	0	0	0	0	0	0	0	0	2	0	0	0	0	0	0	0	0	k__Fungi	p__Ascomycota	c__Dothideomycetes	o__Pleosporales	f__Phaeosphaeriaceae	g__Stagonospora	s__unidentified_Stagonospora	New.CleanUp.ReferenceOTU89377
OTU5264	0	0	0	0	0	2	0	0	0	0	0	0	0	0	0	0	0	0	0	0	0	0	0	0	0	0	1	25	0	0	0	4	0	0	0	0	k__Fungi	p__Ascomycota	c__Dothideomycetes	o__Pleosporales	f__Phaeosphaeriaceae	g__unidentified_Phaeosphaeriaceae	s__unidentified_Phaeosphaeriaceae	New.CleanUp.ReferenceOTU115560
OTU4105	0	0	0	0	0	9	0	0	0	0	0	0	0	0	0	0	0	0	0	0	0	0	0	0	0	0	0	0	0	0	0	0	0	0	0	0	k__Fungi	p__Ascomycota	c__Dothideomycetes	o__Pleosporales	f__Phaeosphaeriaceae	g__unidentified_Phaeosphaeriaceae	s__unidentified_Phaeosphaeriaceae	New.CleanUp.ReferenceOTU78553
OTU3428	0	0	0	0	0	0	5	0	0	0	0	0	0	0	0	0	0	0	0	0	0	0	0	0	0	0	0	0	0	0	0	0	0	0	0	0	k__Fungi	p__Ascomycota	c__Dothideomycetes	o__Pleosporales	f__Phaeosphaeriaceae	g__unidentified_Phaeosphaeriaceae	s__unidentified_Phaeosphaeriaceae	New.CleanUp.ReferenceOTU97869
OTU5262	0	0	0	0	0	0	0	0	0	0	19	4	0	0	0	0	0	0	0	0	0	0	0	0	0	0	0	0	0	0	0	0	4	0	0	0	k__Fungi	p__Ascomycota	c__Dothideomycetes	o__Pleosporales	f__Pleomassariaceae	g__unidentified_Pleomassariaceae	s__unidentified_Pleomassariaceae	New.CleanUp.ReferenceOTU90979
OTU5997	5	1	4	2	0	21	1	0	0	1	21	5	0	1	10	0	0	3	0	0	0	0	2	0	0	4	1	14	0	0	1	5	1	0	1	3	k__Fungi	p__Ascomycota	c__Dothideomycetes	o__Pleosporales	f__Pleosporaceae	g__unidentified_Pleosporaceae	s__unidentified_Pleosporaceae	SH016818.07FU_FJ839608_refs
OTU5708	0	0	0	0	0	0	0	0	0	0	0	0	0	0	0	0	0	0	0	0	0	0	0	0	0	6	0	33	0	1	2	10	0	0	0	4	k__Fungi	p__Ascomycota	c__Dothideomycetes	o__Pleosporales	f__Pleosporaceae	g__unidentified_Pleosporaceae	s__unidentified_Pleosporaceae	New.CleanUp.ReferenceOTU96937
OTU4373	0	0	0	0	0	0	0	0	0	0	0	0	0	0	0	0	0	0	0	0	0	0	0	0	0	0	0	3	0	0	0	9	0	0	0	0	k__Fungi	p__Ascomycota	c__Dothideomycetes	o__Pleosporales	f__Pleosporaceae	g__unidentified_Pleosporaceae	s__unidentified_Pleosporaceae	SH012502.07FU_AY004805_reps
OTU4627	0	0	0	0	0	3	0	0	0	0	1	0	0	0	0	0	0	0	0	0	0	0	0	0	0	0	0	0	1	0	0	0	0	0	0	0	k__Fungi	p__Ascomycota	c__Dothideomycetes	o__Pleosporales	f__Pleosporaceae	g__unidentified_Pleosporaceae	s__unidentified_Pleosporaceae	SH487464.07FU_KT203176_reps
OTU1379	2	0	0	0	0	0	0	0	0	0	0	0	0	0	0	0	0	0	0	0	0	0	0	0	0	0	0	0	0	0	0	0	0	0	0	0	k__Fungi	p__Ascomycota	c__Dothideomycetes	o__Pleosporales	f__Pleosporaceae	g__unidentified_Pleosporaceae	s__unidentified_Pleosporaceae	New.CleanUp.ReferenceOTU41757
OTU511	0	0	0	0	0	0	0	0	0	0	0	0	0	0	0	0	0	0	0	0	0	0	0	0	0	0	0	1	0	0	0	0	0	0	0	0	k__Fungi	p__Ascomycota	c__Dothideomycetes	o__Pleosporales	f__Pleosporaceae	g__unidentified_Pleosporaceae	s__unidentified_Pleosporaceae	New.CleanUp.ReferenceOTU113564
OTU5167	0	0	0	0	0	0	0	0	1	2	0	0	6	5	0	0	0	0	0	0	0	0	0	11	3	0	0	0	0	0	0	0	0	0	0	0	k__Fungi	p__Ascomycota	c__Dothideomycetes	o__Pleosporales	f__Pleosporaceae	g__Alternaria	s__unidentified_Alternaria	New.CleanUp.ReferenceOTU25756
OTU4458	0	0	0	0	0	0	0	0	0	0	0	0	0	0	0	0	0	0	0	0	0	0	0	0	0	0	0	2	0	0	0	5	0	0	0	0	k__Fungi	p__Ascomycota	c__Dothideomycetes	o__Pleosporales	f__Pleosporaceae	g__Alternaria	s__unidentified_Alternaria	SH492991.07FU_LN833539_reps_singleton
OTU2458	0	0	3	0	0	0	0	0	0	0	0	0	0	0	0	0	0	0	0	0	0	0	0	0	0	0	0	0	0	0	0	0	0	0	0	0	k__Fungi	p__Ascomycota	c__Dothideomycetes	o__Pleosporales	f__Pleosporaceae	g__Alternaria	s__Alternaria_solani	SH026465.07FU_JF491215_reps_singleton
OTU1175	0	0	0	0	0	0	0	0	0	0	0	0	0	0	0	0	0	0	0	0	0	0	0	0	0	0	0	0	0	0	0	2	0	0	0	0	k__Fungi	p__Ascomycota	c__Dothideomycetes	o__Pleosporales	f__Pleosporaceae	g__Bipolaris	s__unidentified_Bipolaris	SH491142.07FU_KR819404_reps_singleton
OTU49	0	0	0	0	0	0	0	0	0	0	0	0	0	0	0	0	0	0	0	0	0	0	0	0	0	0	0	0	0	0	0	0	0	0	1	0	k__Fungi	p__Ascomycota	c__Dothideomycetes	o__Pleosporales	f__Pleosporaceae	g__Curvularia	s__unidentified_Curvularia	SH489281.07FU_KF852581_reps_singleton
OTU1215	0	0	0	0	0	0	0	0	0	0	0	0	0	0	2	0	0	0	0	0	0	0	0	0	0	0	0	0	0	0	0	0	0	0	0	0	k__Fungi	p__Ascomycota	c__Dothideomycetes	o__Pleosporales	f__Pleosporaceae	g__Dendryphion	s__unidentified_Dendryphion	SH020803.07FU_JF433009_reps
OTU6586	3	2	7	2	6	51	18	30	30	25	11	14	4	0	0	0	13	0	27	8	10	57	35	0	0	0	1	0	0	0	0	19	45	25	33	23	k__Fungi	p__Ascomycota	c__Dothideomycetes	o__Pleosporales	f__Pleosporaceae	g__Drechslera	s__unidentified_Drechslera	SH010243.07FU_FJ868975_reps
OTU5340	0	0	0	0	0	0	0	0	0	0	0	0	0	0	0	0	0	0	0	0	0	0	0	0	0	0	0	0	0	0	4	0	18	1	9	4	k__Fungi	p__Ascomycota	c__Dothideomycetes	o__Pleosporales	f__Pleosporaceae	g__unidentified_Pleosporaceae	s__unidentified_Pleosporaceae	SH019446.07FU_AB847028_reps
OTU3782	0	0	0	0	0	0	0	0	0	0	0	0	0	0	0	0	0	0	0	0	0	0	0	0	0	0	0	0	0	0	1	0	3	0	3	0	k__Fungi	p__Ascomycota	c__Dothideomycetes	o__Pleosporales	f__Pleosporaceae	g__unidentified_Pleosporaceae	s__unidentified_Pleosporaceae	New.CleanUp.ReferenceOTU11365
OTU3626	0	0	0	0	0	0	0	0	0	0	0	0	0	0	0	0	0	0	0	0	0	0	0	0	0	0	0	0	0	0	0	0	0	0	4	0	k__Fungi	p__Ascomycota	c__Dothideomycetes	o__Pleosporales	f__Pleosporaceae	g__unidentified_Pleosporaceae	s__unidentified_Pleosporaceae	New.CleanUp.ReferenceOTU61403
OTU2411	0	0	0	0	0	1	0	0	0	0	0	0	0	0	0	0	0	0	0	0	1	0	0	0	1	0	0	0	0	0	0	0	0	0	0	0	k__Fungi	p__Ascomycota	c__Dothideomycetes	o__Pleosporales	f__Pleosporaceae	g__unidentified_Pleosporaceae	s__unidentified_Pleosporaceae	SH021962.07FU_FN386271_reps
OTU5390	0	7	0	0	0	0	2	0	0	0	0	0	0	0	5	1	0	0	0	0	7	0	0	7	0	0	0	0	0	0	0	0	0	0	0	0	k__Fungi	p__Ascomycota	c__Dothideomycetes	o__Pleosporales	f__Pleosporales_fam_Incertae_sedis	g__unidentified_Pleosporales_fam_Incertae_sedis	s__unidentified_Pleosporales_fam_Incertae_sedis	SH010273.07FU_DQ018093_reps_singleton
OTU2584	0	0	0	0	0	0	0	0	0	0	0	0	0	0	0	0	0	0	0	0	3	0	0	0	0	0	0	0	0	0	0	0	0	0	0	0	k__Fungi	p__Ascomycota	c__Dothideomycetes	o__Pleosporales	f__Pleosporales_fam_Incertae_sedis	g__unidentified_Pleosporales_fam_Incertae_sedis	s__unidentified_Pleosporales_fam_Incertae_sedis	New.CleanUp.ReferenceOTU78657
OTU37	0	0	0	0	0	0	0	0	0	0	0	0	0	0	0	0	0	0	0	0	0	0	0	0	0	0	0	1	0	0	0	0	0	0	0	0	k__Fungi	p__Ascomycota	c__Dothideomycetes	o__Pleosporales	f__Pleosporales_fam_Incertae_sedis	g__unidentified_Pleosporales_fam_Incertae_sedis	s__unidentified_Pleosporales_fam_Incertae_sedis	SH020646.07FU_KM056324_reps
OTU126	0	0	0	0	0	0	0	0	0	0	0	0	0	0	0	0	0	0	0	0	0	0	0	0	0	0	0	0	1	0	0	0	0	0	0	0	k__Fungi	p__Ascomycota	c__Dothideomycetes	o__Pleosporales	f__Pleosporales_fam_Incertae_sedis	g__unidentified_Pleosporales_fam_Incertae_sedis	s__unidentified_Pleosporales_fam_Incertae_sedis	SH010266.07FU_JQ267362_reps
OTU5496	11	1	0	0	0	0	0	0	0	0	0	0	0	6	2	2	0	0	0	0	0	0	0	9	0	0	0	0	0	0	0	0	0	0	0	0	k__Fungi	p__Ascomycota	c__Dothideomycetes	o__Pleosporales	f__Pleosporales_fam_Incertae_sedis	g__Anguillospora	s__Anguillospora_longissima	New.CleanUp.ReferenceOTU114763
OTU6076	0	0	0	3	0	0	0	10	0	0	0	0	0	72	0	19	0	0	16	0	7	17	0	0	0	0	0	0	0	0	0	0	0	0	0	0	k__Fungi	p__Ascomycota	c__Dothideomycetes	o__Pleosporales	f__Pleosporales_fam_Incertae_sedis	g__Cheiromoniliophora	s__Cheiromoniliophora_elegans	SH026365.07FU_DQ018099_refs
OTU5797	0	0	0	0	0	0	0	0	2	0	0	0	9	0	0	0	4	0	3	2	4	13	20	0	0	0	0	0	0	0	0	0	5	0	11	7	k__Fungi	p__Ascomycota	c__Dothideomycetes	o__Pleosporales	f__Pleosporales_fam_Incertae_sedis	g__Dictyosporium	s__unidentified_Dictyosporium	SH010265.07FU_KF931342_reps
OTU5544	0	0	0	0	0	0	0	0	0	0	0	0	0	0	0	0	0	0	0	0	0	0	0	22	0	0	0	0	0	0	0	0	0	0	0	0	k__Fungi	p__Ascomycota	c__Dothideomycetes	o__Pleosporales	f__Pleosporales_fam_Incertae_sedis	g__Dictyosporium	s__Dictyosporium_australiense	SH010271.07FU_DQ018092_reps_singleton
OTU2537	0	0	0	0	0	0	0	0	0	0	0	0	0	0	0	0	0	0	0	0	0	0	0	3	0	0	0	0	0	0	0	0	0	0	0	0	k__Fungi	p__Ascomycota	c__Dothideomycetes	o__Pleosporales	f__Pleosporales_fam_Incertae_sedis	g__Dictyosporium	s__Dictyosporium_alatum	New.CleanUp.ReferenceOTU40277
OTU2553	0	0	0	0	0	0	0	0	0	0	0	0	0	0	0	0	0	0	0	0	3	0	0	0	0	0	0	0	0	0	0	0	0	0	0	0	k__Fungi	p__Ascomycota	c__Dothideomycetes	o__Pleosporales	f__Pleosporales_fam_Incertae_sedis	g__Neophaeosphaeria	s__unidentified_Neophaeosphaeria	New.CleanUp.ReferenceOTU55067
OTU101	0	0	0	0	0	0	0	0	0	0	0	0	0	0	0	0	0	0	0	0	0	0	1	0	0	0	0	0	0	0	0	0	0	0	0	0	k__Fungi	p__Ascomycota	c__Dothideomycetes	o__Pleosporales	f__Pleosporales_fam_Incertae_sedis	g__Paraphoma	s__unidentified_Paraphoma	SH025130.07FU_KJ702587_reps_singleton
OTU5146	0	0	0	0	0	0	0	0	0	0	6	0	0	2	0	4	0	1	0	4	2	0	0	0	0	0	0	0	0	0	4	1	0	0	0	0	k__Fungi	p__Ascomycota	c__Dothideomycetes	o__Pleosporales	f__Pleosporales_fam_Incertae_sedis	g__Periconia	s__unidentified_Periconia	SH020105.07FU_FJ820729_reps
OTU4688	0	0	0	0	0	0	0	0	0	0	0	7	0	0	0	0	0	0	0	0	5	0	5	0	0	0	0	0	0	0	0	0	0	0	0	0	k__Fungi	p__Ascomycota	c__Dothideomycetes	o__Pleosporales	f__Pleosporales_fam_Incertae_sedis	g__Periconia	s__unidentified_Periconia	SH020103.07FU_AM084451_reps
OTU3931	0	0	0	0	0	0	0	0	0	0	0	0	0	8	0	0	0	0	0	0	0	0	0	0	0	0	0	0	0	0	0	0	0	0	0	0	k__Fungi	p__Ascomycota	c__Dothideomycetes	o__Pleosporales	f__Pleosporales_fam_Incertae_sedis	g__Periconia	s__unidentified_Periconia	SH489011.07FU_AB809645_reps_singleton
OTU3759	0	0	5	2	0	0	0	0	0	0	0	0	0	0	0	0	0	0	0	0	0	0	0	0	0	0	0	0	0	0	0	0	0	0	0	0	k__Fungi	p__Ascomycota	c__Dothideomycetes	o__Pleosporales	f__Pleosporales_fam_Incertae_sedis	g__Periconia	s__unidentified_Periconia	SH004373.07FU_JX984754_reps
OTU2963	0	0	0	0	0	0	0	0	0	0	0	0	0	0	0	0	0	0	0	0	0	0	0	0	0	0	0	0	4	0	0	0	0	0	0	0	k__Fungi	p__Ascomycota	c__Dothideomycetes	o__Pleosporales	f__Pleosporales_fam_Incertae_sedis	g__Phoma	s__unidentified_Phoma	SH005849.07FU_JQ238617_reps_singleton
OTU5037	0	0	2	0	0	0	0	0	0	0	0	0	0	0	0	0	0	0	0	0	0	0	0	7	0	1	0	0	0	0	0	0	0	2	0	0	k__Fungi	p__Ascomycota	c__Dothideomycetes	o__Pleosporales	f__Pleosporales_fam_Incertae_sedis	g__Pyrenochaeta	s__unidentified_Pyrenochaeta	SH030017.07FU_FN392316_reps
OTU3341	0	0	0	0	0	0	0	0	0	0	0	0	0	0	0	5	0	0	0	0	0	0	0	0	0	0	0	0	0	0	0	0	0	0	0	0	k__Fungi	p__Ascomycota	c__Dothideomycetes	o__Pleosporales	f__Pleosporales_fam_Incertae_sedis	g__Pyrenochaeta	s__unidentified_Pyrenochaeta	SH030021.07FU_KF385302_reps
OTU4078	0	0	0	0	0	0	0	0	0	0	9	0	0	0	0	0	0	0	0	0	0	0	0	0	0	0	0	0	0	0	0	0	0	0	0	0	k__Fungi	p__Ascomycota	c__Dothideomycetes	o__Pleosporales	f__Pleosporales_fam_Incertae_sedis	g__Pyrenochaeta	s__Pyrenochaeta_keratinophila	New.ReferenceOTU667
OTU6308	11	0	0	41	17	0	1	1	2	0	0	59	0	16	0	0	0	0	0	0	26	30	0	6	0	0	0	0	0	0	0	0	0	0	0	0	k__Fungi	p__Ascomycota	c__Dothideomycetes	o__Pleosporales	f__Pleosporales_fam_Incertae_sedis	g__Pyrenochaeta	s__unidentified_Pyrenochaeta	SH014373.07FU_HQ446092_reps
OTU5949	5	0	0	0	0	0	0	0	0	0	7	13	15	0	0	0	0	0	0	0	2	13	2	10	0	0	0	13	0	0	0	0	0	0	0	15	k__Fungi	p__Ascomycota	c__Dothideomycetes	o__Pleosporales	f__Pleosporales_fam_Incertae_sedis	g__Pyrenochaeta	s__unidentified_Pyrenochaeta	SH019261.07FU_EF619733_reps
OTU349	0	0	0	0	0	0	0	0	0	0	0	0	0	0	0	0	0	0	0	0	0	1	0	0	0	0	0	0	0	0	0	0	0	0	0	0	k__Fungi	p__Ascomycota	c__Dothideomycetes	o__Pleosporales	f__Pleosporales_fam_Incertae_sedis	g__Shiraia	s__unidentified_Shiraia	New.CleanUp.ReferenceOTU65735
OTU5147	0	0	25	0	0	0	0	0	0	0	0	0	0	0	0	0	0	0	0	0	0	0	0	0	0	0	0	0	0	0	0	0	0	0	0	0	k__Fungi	p__Ascomycota	c__Dothideomycetes	o__Pleosporales	f__Pleosporales_fam_Incertae_sedis	g__unidentified_Pleosporales_fam_Incertae_sedis	s__unidentified_Pleosporales_fam_Incertae_sedis	New.ReferenceOTU769
OTU5195	0	0	0	0	0	0	0	0	0	0	0	0	0	0	8	0	0	0	0	0	0	0	0	0	0	0	0	0	0	0	0	0	0	0	0	0	k__Fungi	p__Ascomycota	c__Dothideomycetes	o__Pleosporales	f__Pleosporales_fam_Incertae_sedis	g__unidentified_Pleosporales_fam_Incertae_sedis	s__unidentified_Pleosporales_fam_Incertae_sedis	New.CleanUp.ReferenceOTU50954
OTU5934	0	0	0	3	0	1	3	16	3	0	0	0	21	0	1	0	0	10	1	2	0	0	0	0	2	2	0	6	4	6	6	4	0	0	5	0	k__Fungi	p__Ascomycota	c__Dothideomycetes	o__Pleosporales	f__Sporormiaceae	g__unidentified_Sporormiaceae	s__unidentified_Sporormiaceae	SH006642.07FU_GQ203780_reps_singleton
OTU3371	0	0	3	0	0	0	0	0	0	1	0	0	0	0	0	0	0	0	0	0	0	0	0	0	0	0	0	0	0	0	0	0	0	0	0	0	k__Fungi	p__Ascomycota	c__Dothideomycetes	o__Pleosporales	f__Sporormiaceae	g__Preussia	s__unidentified_Preussia	New.CleanUp.ReferenceOTU17132
OTU5853	0	3	8	2	1	1	5	0	0	0	0	11	0	1	2	11	0	0	0	0	0	8	0	0	1	2	0	1	0	0	0	0	0	3	1	0	k__Fungi	p__Ascomycota	c__Dothideomycetes	o__Pleosporales	f__Sporormiaceae	g__Preussia	s__Preussia_persica	New.CleanUp.ReferenceOTU109539
OTU6000	0	0	0	0	0	0	0	0	0	0	0	0	0	10	0	5	0	0	0	0	0	0	0	78	0	0	0	0	0	0	0	0	0	7	0	0	k__Fungi	p__Ascomycota	c__Dothideomycetes	o__Pleosporales	f__Sporormiaceae	g__Preussia	s__unidentified_Preussia	SH488194.07FU_KT269102_reps
OTU296	0	0	1	0	0	0	0	0	0	0	0	0	0	0	0	0	0	0	0	0	0	0	0	0	0	0	0	0	0	0	0	0	0	0	0	0	k__Fungi	p__Ascomycota	c__Dothideomycetes	o__Pleosporales	f__Sporormiaceae	g__Preussia	s__unidentified_Preussia	New.CleanUp.ReferenceOTU50640
OTU5357	0	0	0	0	0	0	0	0	0	0	0	0	0	0	0	0	0	0	0	0	0	0	0	0	0	0	0	0	0	0	0	0	9	12	2	16	k__Fungi	p__Ascomycota	c__Dothideomycetes	o__Pleosporales	f__Sporormiaceae	g__Westerdykella	s__unidentified_Westerdykella	SH006621.07FU_JX235700_refs
OTU5145	0	0	0	0	0	0	0	0	0	0	0	0	12	0	0	0	0	0	0	0	0	0	11	0	0	0	0	0	0	0	0	0	0	0	0	0	k__Fungi	p__Ascomycota	c__Dothideomycetes	o__Pleosporales	f__Sporormiaceae	g__Westerdykella	s__unidentified_Westerdykella	SH006616.07FU_HG917294_reps
OTU5090	0	0	0	0	0	0	0	0	0	0	0	0	0	0	19	0	0	1	0	0	0	0	0	0	0	0	0	0	0	0	0	0	0	0	0	0	k__Fungi	p__Ascomycota	c__Dothideomycetes	o__Pleosporales	f__Sporormiaceae	g__Westerdykella	s__unidentified_Westerdykella	SH006651.07FU_GQ203799_reps_singleton
OTU5723	0	0	0	0	0	0	0	0	0	0	0	0	0	0	0	0	0	0	0	0	0	72	0	0	0	0	0	0	0	0	0	0	0	0	0	0	k__Fungi	p__Ascomycota	c__Dothideomycetes	o__Pleosporales	f__Tetraplosphaeriaceae	g__Tetraplosphaeria	s__Tetraplosphaeria_sasicola	New.CleanUp.ReferenceOTU15280
OTU6624	0	2	0	12	0	2	3	0	0	0	0	0	0	11	12	0	6	108	21	4	4	0	6	0	6	14	4	32	75	9	85	16	0	0	57	10	k__Fungi	p__Ascomycota	c__Dothideomycetes	o__Pleosporales	f__unidentified_Pleosporales	g__unidentified_Pleosporales	s__unidentified_Pleosporales	SH008320.07FU_EU295639_refs
OTU6397	0	0	0	0	0	0	0	0	0	0	0	0	0	0	0	0	0	0	0	0	0	0	0	0	0	0	0	0	0	0	0	0	0	0	0	322	k__Fungi	p__Ascomycota	c__Dothideomycetes	o__Pleosporales	f__unidentified_Pleosporales	g__unidentified_Pleosporales	s__unidentified_Pleosporales	SH016473.07FU_JQ070521_reps
OTU6439	2	1	1	7	0	3	6	15	18	44	6	15	8	16	33	0	6	2	74	5	6	2	7	0	0	0	0	0	0	0	0	0	5	7	1	1	k__Fungi	p__Ascomycota	c__Dothideomycetes	o__Pleosporales	f__unidentified_Pleosporales	g__unidentified_Pleosporales	s__unidentified_Pleosporales	SH008343.07FU_EF635649_reps
OTU6238	0	0	87	0	0	0	0	0	0	0	0	0	0	0	0	0	0	0	0	0	0	0	0	0	1	1	0	0	0	0	0	0	3	112	4	1	k__Fungi	p__Ascomycota	c__Dothideomycetes	o__Pleosporales	f__unidentified_Pleosporales	g__unidentified_Pleosporales	s__unidentified_Pleosporales	New.ReferenceOTU458
OTU6086	2	0	16	1	0	0	3	0	0	0	0	0	19	5	0	14	0	1	0	0	0	0	0	0	0	0	0	0	1	6	0	0	0	0	0	67	k__Fungi	p__Ascomycota	c__Dothideomycetes	o__Pleosporales	f__unidentified_Pleosporales	g__unidentified_Pleosporales	s__unidentified_Pleosporales	SH016303.07FU_KC339223_reps
OTU5996	4	1	4	1	0	0	1	0	0	0	7	3	9	32	0	5	0	1	1	3	7	8	2	0	4	2	1	2	2	1	10	2	0	0	0	0	k__Fungi	p__Ascomycota	c__Dothideomycetes	o__Pleosporales	f__unidentified_Pleosporales	g__unidentified_Pleosporales	s__unidentified_Pleosporales	SH022164.07FU_FJ553168_reps
OTU6336	0	0	0	0	0	0	0	0	0	0	0	0	0	0	1	0	0	0	5	0	0	0	0	0	0	10	6	1	0	75	0	1	0	0	0	0	k__Fungi	p__Ascomycota	c__Dothideomycetes	o__Pleosporales	f__unidentified_Pleosporales	g__unidentified_Pleosporales	s__unidentified_Pleosporales	SH460059.07FU_HQ445456_reps_singleton
OTU5823	0	0	0	12	0	0	0	7	0	0	0	0	6	0	0	0	0	0	0	0	0	0	62	0	0	0	0	0	0	0	0	0	0	0	0	0	k__Fungi	p__Ascomycota	c__Dothideomycetes	o__Pleosporales	f__unidentified_Pleosporales	g__unidentified_Pleosporales	s__unidentified_Pleosporales	New.CleanUp.ReferenceOTU54543
OTU5799	0	0	55	0	0	1	28	0	0	0	0	0	0	0	0	0	0	0	0	0	0	0	0	0	0	0	0	0	0	0	0	0	0	0	0	0	k__Fungi	p__Ascomycota	c__Dothideomycetes	o__Pleosporales	f__unidentified_Pleosporales	g__unidentified_Pleosporales	s__unidentified_Pleosporales	New.CleanUp.ReferenceOTU55168
OTU5781	0	0	0	3	0	0	8	0	0	1	0	0	7	0	0	0	5	0	0	0	0	0	0	0	0	0	0	0	0	0	0	0	22	0	7	26	k__Fungi	p__Ascomycota	c__Dothideomycetes	o__Pleosporales	f__unidentified_Pleosporales	g__unidentified_Pleosporales	s__unidentified_Pleosporales	New.CleanUp.ReferenceOTU13932
OTU5692	0	0	0	0	0	0	0	0	0	0	0	38	0	0	0	0	0	0	0	0	0	0	0	15	0	0	0	0	0	0	0	0	0	0	0	3	k__Fungi	p__Ascomycota	c__Dothideomycetes	o__Pleosporales	f__unidentified_Pleosporales	g__unidentified_Pleosporales	s__unidentified_Pleosporales	SH495027.07FU_KT309961_reps_singleton
OTU6446	5	0	3	0	1	0	0	0	0	0	0	0	0	0	8	6	5	1	8	5	0	0	0	0	0	0	1	3	2	0	0	1	0	0	0	0	k__Fungi	p__Ascomycota	c__Dothideomycetes	o__Pleosporales	f__unidentified_Pleosporales	g__unidentified_Pleosporales	s__unidentified_Pleosporales	SH020691.07FU_HM116750_reps
OTU5431	0	0	0	0	0	0	0	3	2	0	0	0	0	0	0	0	0	0	0	0	5	18	16	0	0	0	0	0	0	0	0	0	0	0	0	0	k__Fungi	p__Ascomycota	c__Dothideomycetes	o__Pleosporales	f__unidentified_Pleosporales	g__unidentified_Pleosporales	s__unidentified_Pleosporales	New.CleanUp.ReferenceOTU80900
OTU5300	0	0	13	0	1	0	0	0	0	0	0	0	0	0	0	0	0	0	0	0	3	0	0	0	1	1	0	0	3	3	3	5	0	0	0	0	k__Fungi	p__Ascomycota	c__Dothideomycetes	o__Pleosporales	f__unidentified_Pleosporales	g__unidentified_Pleosporales	s__unidentified_Pleosporales	SH016198.07FU_FM172825_reps
OTU4941	0	0	7	0	0	0	0	0	0	0	0	0	0	4	0	0	0	4	0	0	0	0	0	0	2	0	0	0	0	0	0	1	0	0	0	0	k__Fungi	p__Ascomycota	c__Dothideomycetes	o__Pleosporales	f__unidentified_Pleosporales	g__unidentified_Pleosporales	s__unidentified_Pleosporales	New.CleanUp.ReferenceOTU102310
OTU4578	0	0	0	11	0	0	0	0	0	0	0	0	0	0	0	4	0	0	0	0	0	0	0	0	0	0	0	0	0	0	0	0	0	0	0	0	k__Fungi	p__Ascomycota	c__Dothideomycetes	o__Pleosporales	f__unidentified_Pleosporales	g__unidentified_Pleosporales	s__unidentified_Pleosporales	SH008369.07FU_KJ188732_reps_singleton
OTU4652	0	0	0	0	0	0	0	0	0	0	0	0	0	14	1	0	0	0	0	0	0	0	0	0	0	0	0	0	0	0	0	0	0	0	0	0	k__Fungi	p__Ascomycota	c__Dothideomycetes	o__Pleosporales	f__unidentified_Pleosporales	g__unidentified_Pleosporales	s__unidentified_Pleosporales	New.CleanUp.ReferenceOTU102860
OTU5063	0	0	0	0	0	0	0	0	0	0	0	0	3	0	0	0	2	0	0	0	0	0	0	6	0	0	0	0	0	0	0	0	0	1	0	2	k__Fungi	p__Ascomycota	c__Dothideomycetes	o__Pleosporales	f__unidentified_Pleosporales	g__unidentified_Pleosporales	s__unidentified_Pleosporales	SH464245.07FU_AF504831_reps_singleton
OTU4371	0	0	0	0	0	0	0	0	0	0	0	12	0	0	0	0	0	0	0	0	0	0	0	0	0	0	0	0	0	0	0	0	0	0	0	0	k__Fungi	p__Ascomycota	c__Dothideomycetes	o__Pleosporales	f__unidentified_Pleosporales	g__unidentified_Pleosporales	s__unidentified_Pleosporales	SH017502.07FU_EU516846_reps
OTU4292	0	0	0	0	0	0	0	0	0	0	0	10	0	0	0	0	0	0	0	0	0	0	0	0	0	0	0	0	0	0	0	0	0	0	0	0	k__Fungi	p__Ascomycota	c__Dothideomycetes	o__Pleosporales	f__unidentified_Pleosporales	g__unidentified_Pleosporales	s__unidentified_Pleosporales	New.CleanUp.ReferenceOTU2973
OTU4070	0	0	4	0	0	0	0	0	0	0	0	0	0	0	5	0	0	0	0	0	0	0	0	0	0	0	0	0	0	0	0	0	0	0	0	0	k__Fungi	p__Ascomycota	c__Dothideomycetes	o__Pleosporales	f__unidentified_Pleosporales	g__unidentified_Pleosporales	s__unidentified_Pleosporales	SH019038.07FU_JN545815_reps
OTU3942	0	0	1	0	0	0	0	0	0	0	0	0	0	2	0	0	0	0	0	0	2	0	1	0	0	0	0	0	0	0	0	0	0	0	0	2	k__Fungi	p__Ascomycota	c__Dothideomycetes	o__Pleosporales	f__unidentified_Pleosporales	g__unidentified_Pleosporales	s__unidentified_Pleosporales	New.CleanUp.ReferenceOTU766
OTU3785	0	0	0	0	0	0	0	0	0	0	0	7	0	0	0	0	0	0	0	0	0	0	0	0	0	0	0	0	0	0	0	0	0	0	0	0	k__Fungi	p__Ascomycota	c__Dothideomycetes	o__Pleosporales	f__unidentified_Pleosporales	g__unidentified_Pleosporales	s__unidentified_Pleosporales	New.CleanUp.ReferenceOTU13384
OTU3592	0	0	0	0	0	0	0	0	3	0	0	0	0	0	0	0	0	3	0	0	0	0	0	0	0	0	0	0	0	0	0	0	0	0	0	0	k__Fungi	p__Ascomycota	c__Dothideomycetes	o__Pleosporales	f__unidentified_Pleosporales	g__unidentified_Pleosporales	s__unidentified_Pleosporales	SH005806.07FU_KC966093_reps
OTU4277	0	0	0	0	0	0	0	0	0	0	0	0	0	0	0	0	0	2	0	0	0	0	0	0	0	0	0	1	1	0	2	0	0	0	0	0	k__Fungi	p__Ascomycota	c__Dothideomycetes	o__Pleosporales	f__unidentified_Pleosporales	g__unidentified_Pleosporales	s__unidentified_Pleosporales	SH492669.07FU_KP843441_reps_singleton
OTU3390	0	0	0	0	0	0	0	0	0	0	0	3	0	0	0	0	0	0	0	0	0	0	0	0	0	0	0	1	1	0	0	0	0	0	0	0	k__Fungi	p__Ascomycota	c__Dothideomycetes	o__Pleosporales	f__unidentified_Pleosporales	g__unidentified_Pleosporales	s__unidentified_Pleosporales	New.CleanUp.ReferenceOTU40473
OTU3441	0	0	0	1	0	0	1	0	0	0	0	0	2	0	0	0	0	0	0	0	0	0	0	0	0	0	0	0	0	0	0	0	0	0	0	0	k__Fungi	p__Ascomycota	c__Dothideomycetes	o__Pleosporales	f__unidentified_Pleosporales	g__unidentified_Pleosporales	s__unidentified_Pleosporales	New.CleanUp.ReferenceOTU120620
OTU3605	0	0	0	0	0	0	0	0	0	0	0	0	0	3	0	0	0	0	0	1	0	0	0	0	0	0	0	0	0	0	0	0	0	0	0	0	k__Fungi	p__Ascomycota	c__Dothideomycetes	o__Pleosporales	f__unidentified_Pleosporales	g__unidentified_Pleosporales	s__unidentified_Pleosporales	SH017495.07FU_HM208740_reps
OTU2607	0	0	0	0	0	0	0	0	0	0	0	1	0	0	0	2	0	0	0	0	0	0	0	0	0	0	0	0	0	0	0	0	0	0	0	0	k__Fungi	p__Ascomycota	c__Dothideomycetes	o__Pleosporales	f__unidentified_Pleosporales	g__unidentified_Pleosporales	s__unidentified_Pleosporales	New.CleanUp.ReferenceOTU94184
OTU2984	0	0	0	0	0	0	0	0	0	0	0	0	0	0	0	0	0	0	0	0	0	0	0	0	0	0	2	1	0	0	0	0	0	0	0	0	k__Fungi	p__Ascomycota	c__Dothideomycetes	o__Pleosporales	f__unidentified_Pleosporales	g__unidentified_Pleosporales	s__unidentified_Pleosporales	SH473198.07FU_FJ553423_reps_singleton
OTU3054	0	0	0	0	0	0	0	0	0	0	0	0	0	2	0	0	0	1	0	0	0	0	0	0	0	0	0	0	0	0	0	0	0	0	0	0	k__Fungi	p__Ascomycota	c__Dothideomycetes	o__Pleosporales	f__unidentified_Pleosporales	g__unidentified_Pleosporales	s__unidentified_Pleosporales	New.CleanUp.ReferenceOTU40547
OTU3125	0	0	0	0	0	0	0	0	0	0	0	0	0	1	0	0	0	0	0	0	0	0	0	0	0	0	0	0	0	0	1	1	0	0	0	0	k__Fungi	p__Ascomycota	c__Dothideomycetes	o__Pleosporales	f__unidentified_Pleosporales	g__unidentified_Pleosporales	s__unidentified_Pleosporales	New.CleanUp.ReferenceOTU122003
OTU3601	0	0	3	0	0	0	0	0	0	0	0	0	0	0	0	0	0	0	0	0	0	0	0	0	0	0	0	0	0	0	0	0	0	0	0	0	k__Fungi	p__Ascomycota	c__Dothideomycetes	o__Pleosporales	f__unidentified_Pleosporales	g__unidentified_Pleosporales	s__unidentified_Pleosporales	SH004167.07FU_KC339235_reps_singleton
OTU1174	0	0	2	0	0	0	0	0	0	0	0	0	0	0	0	0	0	0	0	0	0	0	0	0	0	0	0	0	0	0	0	0	0	0	0	0	k__Fungi	p__Ascomycota	c__Dothideomycetes	o__Pleosporales	f__unidentified_Pleosporales	g__unidentified_Pleosporales	s__unidentified_Pleosporales	SH024991.07FU_AY590793_reps
OTU1342	0	0	0	0	0	0	0	0	0	0	0	0	0	0	0	0	0	2	0	0	0	0	0	0	0	0	0	0	0	0	0	0	0	0	0	0	k__Fungi	p__Ascomycota	c__Dothideomycetes	o__Pleosporales	f__unidentified_Pleosporales	g__unidentified_Pleosporales	s__unidentified_Pleosporales	New.CleanUp.ReferenceOTU26776
OTU1513	0	0	0	0	0	0	0	0	0	0	0	0	0	0	0	0	0	0	0	0	0	2	0	0	0	0	0	0	0	0	0	0	0	0	0	0	k__Fungi	p__Ascomycota	c__Dothideomycetes	o__Pleosporales	f__unidentified_Pleosporales	g__unidentified_Pleosporales	s__unidentified_Pleosporales	New.CleanUp.ReferenceOTU80446
OTU1537	0	0	0	0	0	0	0	0	0	0	0	0	0	0	0	0	0	0	0	0	0	0	0	0	0	0	0	0	0	0	0	0	2	0	0	0	k__Fungi	p__Ascomycota	c__Dothideomycetes	o__Pleosporales	f__unidentified_Pleosporales	g__unidentified_Pleosporales	s__unidentified_Pleosporales	New.CleanUp.ReferenceOTU87200
OTU46	0	0	0	0	0	0	0	0	0	0	0	0	0	0	0	0	0	0	0	0	0	0	0	0	0	0	0	0	1	0	0	0	0	0	0	0	k__Fungi	p__Ascomycota	c__Dothideomycetes	o__Pleosporales	f__unidentified_Pleosporales	g__unidentified_Pleosporales	s__unidentified_Pleosporales	SH488002.07FU_KT328637_reps_singleton
OTU83	0	0	0	1	0	0	0	0	0	0	0	0	0	0	0	0	0	0	0	0	0	0	0	0	0	0	0	0	0	0	0	0	0	0	0	0	k__Fungi	p__Ascomycota	c__Dothideomycetes	o__Pleosporales	f__unidentified_Pleosporales	g__unidentified_Pleosporales	s__unidentified_Pleosporales	SH008321.07FU_EU144809_reps
OTU116	0	0	0	0	0	0	0	0	0	0	0	0	0	0	1	0	0	0	0	0	0	0	0	0	0	0	0	0	0	0	0	0	0	0	0	0	k__Fungi	p__Ascomycota	c__Dothideomycetes	o__Pleosporales	f__unidentified_Pleosporales	g__unidentified_Pleosporales	s__unidentified_Pleosporales	SH008358.07FU_EU552112_reps_singleton
OTU182	0	0	0	0	0	0	0	0	0	0	0	0	0	0	0	0	0	0	0	0	0	0	0	0	0	0	0	0	1	0	0	0	0	0	0	0	k__Fungi	p__Ascomycota	c__Dothideomycetes	o__Pleosporales	f__unidentified_Pleosporales	g__unidentified_Pleosporales	s__unidentified_Pleosporales	New.CleanUp.ReferenceOTU12692
OTU468	0	0	1	0	0	0	0	0	0	0	0	0	0	0	0	0	0	0	0	0	0	0	0	0	0	0	0	0	0	0	0	0	0	0	0	0	k__Fungi	p__Ascomycota	c__Dothideomycetes	o__Pleosporales	f__unidentified_Pleosporales	g__unidentified_Pleosporales	s__unidentified_Pleosporales	New.CleanUp.ReferenceOTU100583
OTU484	0	0	0	0	0	0	0	0	0	0	0	0	0	0	0	0	0	0	0	0	0	0	0	0	0	0	0	1	0	0	0	0	0	0	0	0	k__Fungi	p__Ascomycota	c__Dothideomycetes	o__Pleosporales	f__unidentified_Pleosporales	g__unidentified_Pleosporales	s__unidentified_Pleosporales	New.CleanUp.ReferenceOTU104868
OTU550	0	0	1	0	0	0	0	0	0	0	0	0	0	0	0	0	0	0	0	0	0	0	0	0	0	0	0	0	0	0	0	0	0	0	0	0	k__Fungi	p__Ascomycota	c__Dothideomycetes	o__Pleosporales	f__unidentified_Pleosporales	g__unidentified_Pleosporales	s__unidentified_Pleosporales	New.CleanUp.ReferenceOTU122782
OTU3588	0	0	0	0	0	0	0	0	0	0	0	6	0	0	0	0	0	0	0	0	0	0	0	0	0	0	0	0	0	0	0	0	0	0	0	0	k__Fungi	p__Ascomycota	c__Dothideomycetes	o__Tubeufiales	f__Tubeufiaceae	g__unidentified_Tubeufiaceae	s__unidentified_Tubeufiaceae	SH023937.07FU_DQ124145_reps
OTU2462	0	0	0	0	0	0	0	0	0	0	0	0	0	0	0	0	0	0	0	1	0	0	0	0	1	0	0	0	1	0	0	0	0	0	0	0	k__Fungi	p__Ascomycota	c__Dothideomycetes	o__Tubeufiales	f__Tubeufiaceae	g__unidentified_Tubeufiaceae	s__unidentified_Tubeufiaceae	SH018857.07FU_AY916487_reps
OTU5263	0	0	0	0	0	0	0	0	0	0	0	21	0	0	0	0	0	0	0	0	1	11	0	0	0	0	0	0	0	0	0	0	0	0	0	0	k__Fungi	p__Ascomycota	c__Dothideomycetes	o__Tubeufiales	f__Tubeufiaceae	g__unidentified_Tubeufiaceae	s__unidentified_Tubeufiaceae	New.CleanUp.ReferenceOTU105692
OTU4801	0	0	0	0	0	0	0	4	0	0	0	11	0	0	0	0	0	2	0	0	0	0	0	0	0	0	1	0	0	0	0	0	0	0	0	0	k__Fungi	p__Ascomycota	c__Dothideomycetes	o__Tubeufiales	f__Tubeufiaceae	g__unidentified_Tubeufiaceae	s__unidentified_Tubeufiaceae	New.CleanUp.ReferenceOTU5361
OTU3922	0	0	0	0	0	0	0	0	2	0	0	0	0	0	0	0	0	0	0	0	0	0	0	0	0	0	0	0	0	0	0	4	0	0	2	0	k__Fungi	p__Ascomycota	c__Dothideomycetes	o__Tubeufiales	f__Tubeufiaceae	g__unidentified_Tubeufiaceae	s__unidentified_Tubeufiaceae	SH492154.07FU_KT581905_reps
OTU3073	0	0	0	0	0	0	0	0	0	0	0	0	0	4	0	0	0	0	0	0	0	0	0	0	0	0	0	0	0	0	0	0	0	0	0	0	k__Fungi	p__Ascomycota	c__Dothideomycetes	o__Tubeufiales	f__Tubeufiaceae	g__unidentified_Tubeufiaceae	s__unidentified_Tubeufiaceae	New.CleanUp.ReferenceOTU63234
OTU2430	0	0	2	0	0	0	0	0	0	0	0	0	0	0	0	0	0	0	0	0	0	0	0	0	0	0	0	0	0	0	1	0	0	0	0	0	k__Fungi	p__Ascomycota	c__Dothideomycetes	o__Tubeufiales	f__Tubeufiaceae	g__unidentified_Tubeufiaceae	s__unidentified_Tubeufiaceae	SH023935.07FU_AY916461_reps
OTU2508	0	0	1	0	0	0	0	0	0	0	0	0	0	0	0	0	0	0	0	0	0	0	0	0	0	2	0	0	0	0	0	0	0	0	0	0	k__Fungi	p__Ascomycota	c__Dothideomycetes	o__Tubeufiales	f__Tubeufiaceae	g__unidentified_Tubeufiaceae	s__unidentified_Tubeufiaceae	New.CleanUp.ReferenceOTU25054
OTU2632	0	0	0	0	0	0	0	0	0	0	3	0	0	0	0	0	0	0	0	0	0	0	0	0	0	0	0	0	0	0	0	0	0	0	0	0	k__Fungi	p__Ascomycota	c__Dothideomycetes	o__Tubeufiales	f__Tubeufiaceae	g__unidentified_Tubeufiaceae	s__unidentified_Tubeufiaceae	New.CleanUp.ReferenceOTU113955
OTU1532	0	0	0	0	0	0	0	0	0	0	0	0	0	0	0	0	0	0	0	0	0	0	0	0	0	0	0	0	0	0	0	0	0	0	1	1	k__Fungi	p__Ascomycota	c__Dothideomycetes	o__Tubeufiales	f__Tubeufiaceae	g__unidentified_Tubeufiaceae	s__unidentified_Tubeufiaceae	New.CleanUp.ReferenceOTU85515
OTU3015	0	0	0	0	0	0	0	0	0	0	0	0	0	2	0	0	0	0	0	0	0	0	0	0	0	0	0	0	0	0	0	0	0	0	0	0	k__Fungi	p__Ascomycota	c__Dothideomycetes	o__Tubeufiales	f__Tubeufiaceae	g__unidentified_Tubeufiaceae	s__unidentified_Tubeufiaceae	New.CleanUp.ReferenceOTU5698
OTU1524	0	0	1	0	0	0	0	0	0	0	0	0	0	0	0	0	0	0	0	0	0	0	0	0	0	0	0	0	0	0	0	0	0	0	0	0	k__Fungi	p__Ascomycota	c__Dothideomycetes	o__Tubeufiales	f__Tubeufiaceae	g__unidentified_Tubeufiaceae	s__unidentified_Tubeufiaceae	New.CleanUp.ReferenceOTU83474
OTU6670	0	1	0	0	0	0	0	0	0	0	0	0	0	0	0	1	1	2	0	0	0	0	0	0	31	15	25	37	5	13	10	678	0	0	0	0	k__Fungi	p__Ascomycota	c__Dothideomycetes	o__unidentified_Dothideomycetes	f__unidentified_Dothideomycetes	g__unidentified_Dothideomycetes	s__unidentified_Dothideomycetes	SH016467.07FU_HM030634_reps
OTU6443	1	2	30	0	0	0	3	0	6	72	3	21	36	29	20	53	0	1	59	0	0	5	1	0	4	0	0	0	1	0	0	0	0	0	0	1	k__Fungi	p__Ascomycota	c__Dothideomycetes	o__unidentified_Dothideomycetes	f__unidentified_Dothideomycetes	g__unidentified_Dothideomycetes	s__unidentified_Dothideomycetes	SH004149.07FU_DQ421181_reps
OTU6208	124	2	22	0	2	1	1	4	0	0	0	12	10	0	0	0	0	21	0	4	0	0	0	0	0	0	0	0	0	0	0	0	0	0	0	0	k__Fungi	p__Ascomycota	c__Dothideomycetes	o__unidentified_Dothideomycetes	f__unidentified_Dothideomycetes	g__unidentified_Dothideomycetes	s__unidentified_Dothideomycetes	New.ReferenceOTU236
OTU5831	5	0	0	0	0	0	0	0	0	0	0	0	0	0	0	2	0	2	0	0	0	0	0	7	0	4	0	0	0	0	9	8	5	0	3	1	k__Fungi	p__Ascomycota	c__Dothideomycetes	o__unidentified_Dothideomycetes	f__unidentified_Dothideomycetes	g__unidentified_Dothideomycetes	s__unidentified_Dothideomycetes	New.CleanUp.ReferenceOTU59676
OTU5425	2	0	6	0	0	0	0	0	0	0	0	0	36	0	0	0	0	0	0	0	0	0	0	0	0	0	0	0	0	0	0	0	0	0	0	0	k__Fungi	p__Ascomycota	c__Dothideomycetes	o__unidentified_Dothideomycetes	f__unidentified_Dothideomycetes	g__unidentified_Dothideomycetes	s__unidentified_Dothideomycetes	SH006625.07FU_JX489810_reps
OTU4312	0	0	0	0	0	0	0	0	0	0	0	0	0	0	0	0	0	0	0	0	0	0	0	11	0	0	0	0	0	0	0	0	0	0	0	0	k__Fungi	p__Ascomycota	c__Dothideomycetes	o__unidentified_Dothideomycetes	f__unidentified_Dothideomycetes	g__unidentified_Dothideomycetes	s__unidentified_Dothideomycetes	New.CleanUp.ReferenceOTU94050
OTU4856	4	0	0	0	0	0	0	0	0	0	0	0	0	3	0	3	0	0	0	0	0	0	0	0	0	0	0	0	0	0	0	0	0	0	0	0	k__Fungi	p__Ascomycota	c__Dothideomycetes	o__unidentified_Dothideomycetes	f__unidentified_Dothideomycetes	g__unidentified_Dothideomycetes	s__unidentified_Dothideomycetes	SH015427.07FU_JX244063_reps
OTU3928	0	0	0	0	0	0	0	8	0	0	0	0	0	0	0	0	0	0	0	0	0	0	0	0	0	0	0	0	0	0	0	0	0	0	0	0	k__Fungi	p__Ascomycota	c__Dothideomycetes	o__unidentified_Dothideomycetes	f__unidentified_Dothideomycetes	g__unidentified_Dothideomycetes	s__unidentified_Dothideomycetes	SH019473.07FU_HM136643_reps_singleton
OTU3358	0	0	0	0	0	0	0	0	0	0	1	0	0	0	0	0	0	0	0	0	0	0	0	0	0	0	0	0	0	0	4	0	0	0	0	0	k__Fungi	p__Ascomycota	c__Dothideomycetes	o__unidentified_Dothideomycetes	f__unidentified_Dothideomycetes	g__unidentified_Dothideomycetes	s__unidentified_Dothideomycetes	SH029566.07FU_AY836370_reps
OTU132	0	0	0	0	0	0	0	0	0	0	0	0	0	0	0	0	0	0	0	0	1	0	0	0	0	0	0	0	0	0	0	0	0	0	0	0	k__Fungi	p__Ascomycota	c__Dothideomycetes	o__unidentified_Dothideomycetes	f__unidentified_Dothideomycetes	g__unidentified_Dothideomycetes	s__unidentified_Dothideomycetes	New.ReferenceOTU717
OTU222	1	0	0	0	0	0	0	0	0	0	0	0	0	0	0	0	0	0	0	0	0	0	0	0	0	0	0	0	0	0	0	0	0	0	0	0	k__Fungi	p__Ascomycota	c__Dothideomycetes	o__unidentified_Dothideomycetes	f__unidentified_Dothideomycetes	g__unidentified_Dothideomycetes	s__unidentified_Dothideomycetes	New.CleanUp.ReferenceOTU23892
OTU4192	1	0	0	0	0	0	0	0	0	0	0	0	0	0	0	0	0	0	0	0	0	0	0	0	0	0	0	0	0	0	0	0	0	0	0	0	k__Fungi	p__Ascomycota	c__Dothideomycetes	o__unidentified_Dothideomycetes	f__unidentified_Dothideomycetes	g__unidentified_Dothideomycetes	s__unidentified_Dothideomycetes	New.CleanUp.ReferenceOTU18663
OTU3770	0	0	0	0	0	0	0	0	0	0	0	0	0	0	0	4	0	0	0	0	0	0	0	0	0	0	0	0	0	0	0	0	0	0	0	2	k__Fungi	p__Ascomycota	c__Dothideomycetes	o__Valsariales	f__Valsariaceae	g__Valsaria	s__unidentified_Valsaria	SH025336.07FU_KP687886_refs
OTU5306	1	0	1	0	0	2	12	2	0	3	0	0	14	0	0	0	0	0	0	0	0	0	0	0	0	0	0	0	0	0	0	0	0	0	0	0	k__Fungi	p__Ascomycota	c__Dothideomycetes	o__Venturiales	f__unidentified_Venturiales	g__unidentified_Venturiales	s__unidentified_Venturiales	New.ReferenceOTU123
OTU5257	0	0	0	0	0	8	2	0	0	0	0	0	0	0	0	0	2	0	0	0	0	0	0	0	0	0	0	0	0	0	0	0	0	0	0	0	k__Fungi	p__Ascomycota	c__Dothideomycetes	o__Venturiales	f__unidentified_Venturiales	g__unidentified_Venturiales	s__unidentified_Venturiales	New.CleanUp.ReferenceOTU20589
OTU6149	7	2	16	0	0	1	13	0	0	1	0	0	42	0	26	4	13	4	0	9	0	0	6	0	1	0	0	0	0	0	0	0	0	0	0	0	k__Fungi	p__Ascomycota	c__Dothideomycetes	o__Venturiales	f__Venturiaceae	g__unidentified_Venturiaceae	s__unidentified_Venturiaceae	New.CleanUp.ReferenceOTU50324
OTU5032	0	0	0	0	0	0	5	0	0	0	2	3	5	0	0	0	0	0	0	0	0	0	0	0	0	0	0	0	2	2	0	1	0	0	3	3	k__Fungi	p__Ascomycota	c__Dothideomycetes	o__Venturiales	f__Venturiaceae	g__unidentified_Venturiaceae	s__unidentified_Venturiaceae	SH489175.07FU_KT581884_reps
OTU4862	3	0	1	0	0	0	0	0	0	0	0	0	0	0	3	0	0	7	0	0	0	0	0	0	0	1	0	0	1	2	0	3	0	0	0	0	k__Fungi	p__Ascomycota	c__Dothideomycetes	o__Venturiales	f__Venturiaceae	g__unidentified_Venturiaceae	s__unidentified_Venturiaceae	New.ReferenceOTU404
OTU4632	0	0	0	0	0	0	2	0	0	0	0	0	2	0	0	0	4	1	3	4	0	0	0	0	0	0	0	0	0	0	0	0	0	0	0	0	k__Fungi	p__Ascomycota	c__Dothideomycetes	o__Venturiales	f__Venturiaceae	g__unidentified_Venturiaceae	s__unidentified_Venturiaceae	SH031258.07FU_HQ260131_reps_singleton
OTU4864	0	0	0	0	0	0	0	0	0	1	2	3	0	0	0	0	0	0	0	0	0	0	0	0	0	0	0	2	1	0	0	0	2	4	0	0	k__Fungi	p__Ascomycota	c__Dothideomycetes	o__Venturiales	f__Venturiaceae	g__unidentified_Venturiaceae	s__unidentified_Venturiaceae	New.CleanUp.ReferenceOTU13166
OTU4448	0	0	0	0	0	0	11	0	0	0	0	0	0	0	0	0	0	1	0	0	0	0	0	0	0	0	0	0	0	0	0	0	0	0	0	0	k__Fungi	p__Ascomycota	c__Dothideomycetes	o__Venturiales	f__Venturiaceae	g__unidentified_Venturiaceae	s__unidentified_Venturiaceae	SH031227.07FU_EU035437_reps
OTU4206	10	0	0	0	0	0	0	0	0	0	0	0	0	0	0	0	0	0	0	0	0	0	0	0	0	0	0	0	0	0	0	0	0	0	0	0	k__Fungi	p__Ascomycota	c__Dothideomycetes	o__Venturiales	f__Venturiaceae	g__unidentified_Venturiaceae	s__unidentified_Venturiaceae	New.CleanUp.ReferenceOTU98327
OTU3643	1	0	0	0	0	0	1	0	0	0	0	0	1	0	0	0	0	0	0	0	0	0	0	0	0	0	0	0	0	0	0	2	0	0	0	0	k__Fungi	p__Ascomycota	c__Dothideomycetes	o__Venturiales	f__Venturiaceae	g__unidentified_Venturiaceae	s__unidentified_Venturiaceae	New.CleanUp.ReferenceOTU98943
OTU2589	0	0	0	0	0	2	0	0	0	0	0	0	0	0	0	0	0	0	0	0	0	0	0	0	0	0	0	0	0	0	0	0	0	0	0	0	k__Fungi	p__Ascomycota	c__Dothideomycetes	o__Venturiales	f__Venturiaceae	g__unidentified_Venturiaceae	s__unidentified_Venturiaceae	New.CleanUp.ReferenceOTU82871
OTU5414	0	0	1	0	0	0	0	0	0	0	0	0	0	2	0	0	0	0	1	0	0	0	0	0	0	6	2	2	0	2	5	16	1	0	4	1	k__Fungi	p__Ascomycota	c__Dothideomycetes	o__Venturiales	f__Venturiaceae	g__unidentified_Venturiaceae	s__unidentified_Venturiaceae	New.CleanUp.ReferenceOTU67097
OTU5301	9	0	1	0	0	0	0	0	0	0	0	2	0	3	0	0	2	4	0	0	0	0	0	0	0	1	1	0	1	0	0	0	0	0	2	0	k__Fungi	p__Ascomycota	c__Dothideomycetes	o__Venturiales	f__Venturiaceae	g__unidentified_Venturiaceae	s__unidentified_Venturiaceae	SH020202.07FU_JF424292_reps
OTU4084	0	0	0	0	0	0	0	0	0	0	0	3	0	6	0	0	0	0	0	0	0	0	0	0	0	0	0	0	0	0	0	0	0	0	0	0	k__Fungi	p__Ascomycota	c__Dothideomycetes	o__Venturiales	f__Venturiaceae	g__unidentified_Venturiaceae	s__unidentified_Venturiaceae	New.CleanUp.ReferenceOTU20430
OTU368	0	0	1	0	0	0	0	0	0	0	0	0	0	0	0	0	0	0	0	0	0	0	0	0	0	0	0	0	0	0	0	0	0	0	0	0	k__Fungi	p__Ascomycota	c__Dothideomycetes	o__Venturiales	f__Venturiaceae	g__unidentified_Venturiaceae	s__unidentified_Venturiaceae	New.CleanUp.ReferenceOTU71319
OTU5744	0	0	0	0	0	0	0	2	0	0	0	0	0	0	0	0	0	0	0	0	8	33	19	4	0	0	0	0	0	0	0	0	0	0	0	0	k__Fungi	p__Ascomycota	c__Eurotiomycetes	o__unidentified_Eurotiomycetes	f__unidentified_Eurotiomycetes	g__unidentified_Eurotiomycetes	s__unidentified_Eurotiomycetes	New.CleanUp.ReferenceOTU668
OTU4082	0	0	0	0	0	0	4	0	0	0	0	0	3	0	0	0	0	0	0	2	0	0	0	0	0	0	0	0	0	0	0	0	0	0	0	0	k__Fungi	p__Ascomycota	c__Eurotiomycetes	o__unidentified_Eurotiomycetes	f__unidentified_Eurotiomycetes	g__unidentified_Eurotiomycetes	s__unidentified_Eurotiomycetes	New.CleanUp.ReferenceOTU18290
OTU3389	0	0	0	0	0	0	0	0	0	0	0	0	0	0	0	0	0	0	0	0	0	0	0	5	0	0	0	0	0	0	0	0	0	0	0	0	k__Fungi	p__Ascomycota	c__Eurotiomycetes	o__unidentified_Eurotiomycetes	f__unidentified_Eurotiomycetes	g__unidentified_Eurotiomycetes	s__unidentified_Eurotiomycetes	New.CleanUp.ReferenceOTU37002
OTU1212	0	0	0	0	0	0	0	0	0	0	0	0	0	0	0	0	0	0	0	0	0	0	0	0	1	0	0	1	0	0	0	0	0	0	0	0	k__Fungi	p__Ascomycota	c__Eurotiomycetes	o__unidentified_Eurotiomycetes	f__unidentified_Eurotiomycetes	g__unidentified_Eurotiomycetes	s__unidentified_Eurotiomycetes	SH029682.07FU_KF800140_reps
OTU3100	0	0	0	0	0	0	0	0	0	0	0	0	0	0	0	0	0	0	0	2	0	0	0	0	0	0	0	0	0	0	0	0	0	0	0	0	k__Fungi	p__Ascomycota	c__Eurotiomycetes	o__unidentified_Eurotiomycetes	f__unidentified_Eurotiomycetes	g__unidentified_Eurotiomycetes	s__unidentified_Eurotiomycetes	New.CleanUp.ReferenceOTU85045
OTU6541	7	2	8	7	12	0	8	2	2	8	0	7	49	36	7	23	2	67	63	11	6	1	0	12	0	0	0	0	0	0	0	0	3	7	8	13	k__Fungi	p__Ascomycota	c__Eurotiomycetes	o__Arachnomycetales	f__Arachnomycetaceae	g__unidentified_Arachnomycetaceae	s__unidentified_Arachnomycetaceae	New.CleanUp.ReferenceOTU11218
OTU5122	0	0	0	0	0	0	0	0	0	1	0	0	12	2	1	1	1	0	4	1	1	1	0	1	0	0	0	0	0	0	0	0	0	0	0	0	k__Fungi	p__Ascomycota	c__Eurotiomycetes	o__Arachnomycetales	f__Arachnomycetaceae	g__unidentified_Arachnomycetaceae	s__unidentified_Arachnomycetaceae	New.CleanUp.ReferenceOTU88740
OTU4587	1	0	0	0	0	0	0	0	0	0	0	0	0	2	0	0	0	0	2	1	1	0	0	4	0	0	0	0	0	0	0	0	0	0	0	0	k__Fungi	p__Ascomycota	c__Eurotiomycetes	o__Arachnomycetales	f__Arachnomycetaceae	g__unidentified_Arachnomycetaceae	s__unidentified_Arachnomycetaceae	New.CleanUp.ReferenceOTU22270
OTU2534	0	0	0	0	0	0	0	0	0	0	0	0	1	0	0	1	0	0	0	1	0	0	0	0	0	0	0	0	0	0	0	0	0	0	0	0	k__Fungi	p__Ascomycota	c__Eurotiomycetes	o__Arachnomycetales	f__Arachnomycetaceae	g__unidentified_Arachnomycetaceae	s__unidentified_Arachnomycetaceae	New.CleanUp.ReferenceOTU36936
OTU4752	0	0	0	10	0	0	0	0	0	0	0	0	0	5	0	3	0	0	0	0	0	0	0	0	0	0	0	0	0	0	0	0	0	0	0	0	k__Fungi	p__Ascomycota	c__Eurotiomycetes	o__Arachnomycetales	f__Arachnomycetaceae	g__Arachnomyces	s__unidentified_Arachnomyces	New.ReferenceOTU601
OTU2572	0	0	0	1	0	0	0	0	0	0	0	0	0	0	0	0	0	0	0	0	0	0	0	0	0	0	0	0	0	0	0	0	0	0	2	0	k__Fungi	p__Ascomycota	c__Eurotiomycetes	o__Arachnomycetales	f__Arachnomycetaceae	g__Arachnomyces	s__unidentified_Arachnomyces	New.CleanUp.ReferenceOTU68799
OTU6366	0	1	0	0	0	0	0	0	0	2	0	0	0	0	0	0	0	3	0	0	0	0	0	0	5	0	1	15	4	4	143	45	0	6	43	19	k__Fungi	p__Ascomycota	c__Eurotiomycetes	o__Chaetothyriales	f__unidentified_Chaetothyriales	g__unidentified_Chaetothyriales	s__unidentified_Chaetothyriales	SH026636.07FU_UDB004170_reps
OTU6247	0	0	0	2	0	0	0	2	5	68	68	10	0	0	0	0	0	0	0	0	31	1	0	24	0	0	0	0	0	0	0	0	0	0	0	0	k__Fungi	p__Ascomycota	c__Eurotiomycetes	o__Chaetothyriales	f__unidentified_Chaetothyriales	g__unidentified_Chaetothyriales	s__unidentified_Chaetothyriales	New.CleanUp.ReferenceOTU112345
OTU6212	0	0	0	6	0	0	4	5	0	16	0	7	0	0	0	0	0	0	0	0	138	25	0	0	0	0	0	0	0	0	0	0	0	0	0	0	k__Fungi	p__Ascomycota	c__Eurotiomycetes	o__Chaetothyriales	f__unidentified_Chaetothyriales	g__unidentified_Chaetothyriales	s__unidentified_Chaetothyriales	New.CleanUp.ReferenceOTU42411
OTU6125	0	1	0	0	0	0	0	4	0	0	95	66	0	0	0	0	0	0	0	0	0	0	0	0	0	0	0	0	0	0	0	0	0	0	0	0	k__Fungi	p__Ascomycota	c__Eurotiomycetes	o__Chaetothyriales	f__unidentified_Chaetothyriales	g__unidentified_Chaetothyriales	s__unidentified_Chaetothyriales	New.CleanUp.ReferenceOTU90255
OTU6030	0	0	0	0	0	0	0	0	0	18	23	1	0	0	0	0	0	0	0	0	83	4	1	0	0	0	0	0	0	0	0	0	0	0	0	0	k__Fungi	p__Ascomycota	c__Eurotiomycetes	o__Chaetothyriales	f__unidentified_Chaetothyriales	g__unidentified_Chaetothyriales	s__unidentified_Chaetothyriales	New.CleanUp.ReferenceOTU116891
OTU5944	0	0	0	0	0	0	3	0	4	64	28	0	0	0	0	0	0	0	0	0	0	0	0	0	0	0	0	0	0	0	0	0	0	0	0	0	k__Fungi	p__Ascomycota	c__Eurotiomycetes	o__Chaetothyriales	f__unidentified_Chaetothyriales	g__unidentified_Chaetothyriales	s__unidentified_Chaetothyriales	New.CleanUp.ReferenceOTU60477
OTU5871	0	0	0	0	0	0	0	0	0	0	86	10	0	0	0	0	0	0	0	0	0	0	0	0	0	0	0	0	0	0	0	0	0	0	0	0	k__Fungi	p__Ascomycota	c__Eurotiomycetes	o__Chaetothyriales	f__unidentified_Chaetothyriales	g__unidentified_Chaetothyriales	s__unidentified_Chaetothyriales	New.CleanUp.ReferenceOTU90408
OTU5803	0	0	0	0	0	0	4	21	9	17	2	0	2	0	0	0	0	0	0	0	17	11	0	0	0	0	0	0	0	0	0	0	0	0	0	0	k__Fungi	p__Ascomycota	c__Eurotiomycetes	o__Chaetothyriales	f__unidentified_Chaetothyriales	g__unidentified_Chaetothyriales	s__unidentified_Chaetothyriales	New.CleanUp.ReferenceOTU1069
OTU5763	0	0	0	0	0	0	0	0	0	0	18	59	0	0	0	0	0	0	0	0	0	0	0	0	0	0	0	0	0	0	0	0	0	0	0	0	k__Fungi	p__Ascomycota	c__Eurotiomycetes	o__Chaetothyriales	f__unidentified_Chaetothyriales	g__unidentified_Chaetothyriales	s__unidentified_Chaetothyriales	New.CleanUp.ReferenceOTU70118
OTU5737	0	0	0	0	0	0	0	0	0	0	0	0	0	0	0	0	0	0	0	0	0	0	0	0	52	2	0	0	15	0	3	0	0	0	0	0	k__Fungi	p__Ascomycota	c__Eurotiomycetes	o__Chaetothyriales	f__unidentified_Chaetothyriales	g__unidentified_Chaetothyriales	s__unidentified_Chaetothyriales	New.CleanUp.ReferenceOTU117040
OTU5746	0	1	0	0	0	0	0	0	0	7	12	16	0	0	0	0	0	0	0	0	0	14	22	0	0	0	0	0	0	0	0	0	0	0	0	0	k__Fungi	p__Ascomycota	c__Eurotiomycetes	o__Chaetothyriales	f__unidentified_Chaetothyriales	g__unidentified_Chaetothyriales	s__unidentified_Chaetothyriales	New.CleanUp.ReferenceOTU88578
OTU5619	0	0	0	0	0	0	0	0	0	0	0	59	0	0	0	0	0	0	0	0	0	0	0	0	0	0	0	0	0	0	0	0	0	0	0	0	k__Fungi	p__Ascomycota	c__Eurotiomycetes	o__Chaetothyriales	f__unidentified_Chaetothyriales	g__unidentified_Chaetothyriales	s__unidentified_Chaetothyriales	SH023303.07FU_HQ022099_reps
OTU5433	0	1	0	0	0	0	0	0	0	0	42	1	0	0	0	0	0	0	0	0	0	0	0	0	0	0	0	0	0	0	0	0	0	0	0	0	k__Fungi	p__Ascomycota	c__Eurotiomycetes	o__Chaetothyriales	f__unidentified_Chaetothyriales	g__unidentified_Chaetothyriales	s__unidentified_Chaetothyriales	New.CleanUp.ReferenceOTU110002
OTU5392	0	2	0	0	0	0	3	0	0	0	27	10	0	0	0	0	0	0	0	0	0	0	0	0	0	0	0	0	0	0	0	0	0	0	0	0	k__Fungi	p__Ascomycota	c__Eurotiomycetes	o__Chaetothyriales	f__unidentified_Chaetothyriales	g__unidentified_Chaetothyriales	s__unidentified_Chaetothyriales	SH023297.07FU_AY970069_reps
OTU5393	0	0	0	0	0	0	9	0	0	32	1	0	0	0	0	0	0	0	0	0	0	0	0	0	0	0	0	0	0	0	0	0	0	0	0	0	k__Fungi	p__Ascomycota	c__Eurotiomycetes	o__Chaetothyriales	f__unidentified_Chaetothyriales	g__unidentified_Chaetothyriales	s__unidentified_Chaetothyriales	SH021609.07FU_AY970094_reps_singleton
OTU5398	0	0	0	0	0	0	0	0	0	0	11	31	0	0	0	0	0	0	0	0	0	0	0	0	0	0	0	0	0	0	0	0	0	0	0	0	k__Fungi	p__Ascomycota	c__Eurotiomycetes	o__Chaetothyriales	f__unidentified_Chaetothyriales	g__unidentified_Chaetothyriales	s__unidentified_Chaetothyriales	New.CleanUp.ReferenceOTU102894
OTU5443	0	0	0	0	0	0	0	0	0	37	3	0	0	0	0	0	0	0	0	0	0	0	0	0	0	0	0	0	0	0	0	0	0	0	0	0	k__Fungi	p__Ascomycota	c__Eurotiomycetes	o__Chaetothyriales	f__unidentified_Chaetothyriales	g__unidentified_Chaetothyriales	s__unidentified_Chaetothyriales	SH021605.07FU_AY970173_reps
OTU5290	0	0	0	0	0	0	0	0	0	0	36	0	0	0	0	0	0	0	0	0	0	0	0	0	0	0	0	0	0	0	0	0	0	0	0	0	k__Fungi	p__Ascomycota	c__Eurotiomycetes	o__Chaetothyriales	f__unidentified_Chaetothyriales	g__unidentified_Chaetothyriales	s__unidentified_Chaetothyriales	New.CleanUp.ReferenceOTU91076
OTU4643	0	0	0	0	0	0	1	0	0	0	1	0	0	0	0	0	0	0	0	0	4	0	10	0	0	0	0	0	0	0	0	0	0	0	0	0	k__Fungi	p__Ascomycota	c__Eurotiomycetes	o__Chaetothyriales	f__unidentified_Chaetothyriales	g__unidentified_Chaetothyriales	s__unidentified_Chaetothyriales	New.CleanUp.ReferenceOTU40827
OTU4645	0	0	0	0	0	0	0	14	0	0	0	0	0	0	0	0	0	0	0	0	0	0	0	0	0	0	0	0	0	0	0	0	0	0	0	0	k__Fungi	p__Ascomycota	c__Eurotiomycetes	o__Chaetothyriales	f__unidentified_Chaetothyriales	g__unidentified_Chaetothyriales	s__unidentified_Chaetothyriales	New.CleanUp.ReferenceOTU49081
OTU4459	0	2	0	0	0	0	0	0	0	3	8	0	0	0	0	0	0	0	0	0	0	0	0	0	0	0	0	0	0	0	0	0	0	0	0	0	k__Fungi	p__Ascomycota	c__Eurotiomycetes	o__Chaetothyriales	f__unidentified_Chaetothyriales	g__unidentified_Chaetothyriales	s__unidentified_Chaetothyriales	New.ReferenceOTU421
OTU3973	0	0	0	0	0	0	0	0	2	0	0	6	0	0	0	0	0	0	0	0	0	0	0	0	0	0	0	0	0	0	0	0	0	0	0	0	k__Fungi	p__Ascomycota	c__Eurotiomycetes	o__Chaetothyriales	f__unidentified_Chaetothyriales	g__unidentified_Chaetothyriales	s__unidentified_Chaetothyriales	New.CleanUp.ReferenceOTU84393
OTU3975	0	0	0	0	0	0	0	0	0	0	0	8	0	0	0	0	0	0	0	0	0	0	0	0	0	0	0	0	0	0	0	0	0	0	0	0	k__Fungi	p__Ascomycota	c__Eurotiomycetes	o__Chaetothyriales	f__unidentified_Chaetothyriales	g__unidentified_Chaetothyriales	s__unidentified_Chaetothyriales	New.CleanUp.ReferenceOTU85278
OTU3798	0	0	0	0	0	0	0	1	0	0	4	2	0	0	0	0	0	0	0	0	0	0	0	0	0	0	0	0	0	0	0	0	0	0	0	0	k__Fungi	p__Ascomycota	c__Eurotiomycetes	o__Chaetothyriales	f__unidentified_Chaetothyriales	g__unidentified_Chaetothyriales	s__unidentified_Chaetothyriales	New.CleanUp.ReferenceOTU60697
OTU3816	0	0	0	0	0	0	2	0	0	0	0	0	0	0	0	0	0	0	0	0	0	0	5	0	0	0	0	0	0	0	0	0	0	0	0	0	k__Fungi	p__Ascomycota	c__Eurotiomycetes	o__Chaetothyriales	f__unidentified_Chaetothyriales	g__unidentified_Chaetothyriales	s__unidentified_Chaetothyriales	New.CleanUp.ReferenceOTU93582
OTU3642	0	1	0	0	0	0	4	0	1	0	0	0	0	0	0	0	0	0	0	0	0	0	0	0	0	0	0	0	0	0	0	0	0	0	0	0	k__Fungi	p__Ascomycota	c__Eurotiomycetes	o__Chaetothyriales	f__unidentified_Chaetothyriales	g__unidentified_Chaetothyriales	s__unidentified_Chaetothyriales	New.CleanUp.ReferenceOTU97343
OTU4211	0	0	0	0	0	0	0	0	0	5	0	0	0	0	0	0	0	0	0	0	0	0	0	0	0	0	0	0	0	0	0	0	0	0	0	0	k__Fungi	p__Ascomycota	c__Eurotiomycetes	o__Chaetothyriales	f__unidentified_Chaetothyriales	g__unidentified_Chaetothyriales	s__unidentified_Chaetothyriales	New.CleanUp.ReferenceOTU106610
OTU3065	0	0	0	0	0	0	0	3	0	0	1	0	0	0	0	0	0	0	0	0	0	0	0	0	0	0	0	0	0	0	0	0	0	0	0	0	k__Fungi	p__Ascomycota	c__Eurotiomycetes	o__Chaetothyriales	f__unidentified_Chaetothyriales	g__unidentified_Chaetothyriales	s__unidentified_Chaetothyriales	New.CleanUp.ReferenceOTU55349
OTU3088	0	0	0	0	0	0	0	0	0	0	0	4	0	0	0	0	0	0	0	0	0	0	0	0	0	0	0	0	0	0	0	0	0	0	0	0	k__Fungi	p__Ascomycota	c__Eurotiomycetes	o__Chaetothyriales	f__unidentified_Chaetothyriales	g__unidentified_Chaetothyriales	s__unidentified_Chaetothyriales	New.CleanUp.ReferenceOTU75424
OTU3421	0	0	0	0	0	0	0	0	0	2	1	0	0	0	0	0	0	0	0	0	1	0	0	0	0	0	0	0	0	0	0	0	0	0	0	0	k__Fungi	p__Ascomycota	c__Eurotiomycetes	o__Chaetothyriales	f__unidentified_Chaetothyriales	g__unidentified_Chaetothyriales	s__unidentified_Chaetothyriales	New.CleanUp.ReferenceOTU88332
OTU3622	0	0	0	0	0	0	0	0	0	0	4	0	0	0	0	0	0	0	0	0	0	0	0	0	0	0	0	0	0	0	0	0	0	0	0	0	k__Fungi	p__Ascomycota	c__Eurotiomycetes	o__Chaetothyriales	f__unidentified_Chaetothyriales	g__unidentified_Chaetothyriales	s__unidentified_Chaetothyriales	New.CleanUp.ReferenceOTU56040
OTU2460	0	0	0	0	0	0	0	0	0	0	0	0	0	0	0	0	0	0	0	0	0	0	0	0	1	0	0	1	1	0	0	0	0	0	0	0	k__Fungi	p__Ascomycota	c__Eurotiomycetes	o__Chaetothyriales	f__unidentified_Chaetothyriales	g__unidentified_Chaetothyriales	s__unidentified_Chaetothyriales	SH491755.07FU_UDB027816_reps
OTU2531	0	0	0	0	0	0	0	0	0	0	0	0	0	0	0	0	0	0	0	0	3	0	0	0	0	0	0	0	0	0	0	0	0	0	0	0	k__Fungi	p__Ascomycota	c__Eurotiomycetes	o__Chaetothyriales	f__unidentified_Chaetothyriales	g__unidentified_Chaetothyriales	s__unidentified_Chaetothyriales	New.CleanUp.ReferenceOTU35241
OTU2547	0	0	0	0	0	0	0	0	0	0	3	0	0	0	0	0	0	0	0	0	0	0	0	0	0	0	0	0	0	0	0	0	0	0	0	0	k__Fungi	p__Ascomycota	c__Eurotiomycetes	o__Chaetothyriales	f__unidentified_Chaetothyriales	g__unidentified_Chaetothyriales	s__unidentified_Chaetothyriales	New.CleanUp.ReferenceOTU47934
OTU1207	0	0	0	0	0	0	0	0	0	0	0	0	0	0	0	0	0	0	0	0	0	0	0	0	0	0	0	0	0	0	0	2	0	0	0	0	k__Fungi	p__Ascomycota	c__Eurotiomycetes	o__Chaetothyriales	f__unidentified_Chaetothyriales	g__unidentified_Chaetothyriales	s__unidentified_Chaetothyriales	SH015644.07FU_JQ766431_reps
OTU1213	0	0	0	0	0	0	0	0	0	0	0	0	0	0	1	0	0	1	0	0	0	0	0	0	0	0	0	0	0	0	0	0	0	0	0	0	k__Fungi	p__Ascomycota	c__Eurotiomycetes	o__Chaetothyriales	f__unidentified_Chaetothyriales	g__unidentified_Chaetothyriales	s__unidentified_Chaetothyriales	SH022461.07FU_AY559349_reps_singleton
OTU1567	0	0	0	0	0	0	0	0	0	2	0	0	0	0	0	0	0	0	0	0	0	0	0	0	0	0	0	0	0	0	0	0	0	0	0	0	k__Fungi	p__Ascomycota	c__Eurotiomycetes	o__Chaetothyriales	f__unidentified_Chaetothyriales	g__unidentified_Chaetothyriales	s__unidentified_Chaetothyriales	New.CleanUp.ReferenceOTU97668
OTU1576	0	0	0	0	0	0	0	0	2	0	0	0	0	0	0	0	0	0	0	0	0	0	0	0	0	0	0	0	0	0	0	0	0	0	0	0	k__Fungi	p__Ascomycota	c__Eurotiomycetes	o__Chaetothyriales	f__unidentified_Chaetothyriales	g__unidentified_Chaetothyriales	s__unidentified_Chaetothyriales	New.CleanUp.ReferenceOTU100378
OTU102	0	0	0	0	0	0	0	0	0	0	0	0	0	0	0	0	0	0	0	0	0	0	0	0	0	1	0	0	0	0	0	0	0	0	0	0	k__Fungi	p__Ascomycota	c__Eurotiomycetes	o__Chaetothyriales	f__unidentified_Chaetothyriales	g__unidentified_Chaetothyriales	s__unidentified_Chaetothyriales	SH012582.07FU_UDB020631_reps
OTU3008	0	0	0	0	0	0	0	0	0	0	0	0	0	0	0	0	0	0	0	0	0	0	1	0	0	0	0	0	0	0	0	0	0	0	0	0	k__Fungi	p__Ascomycota	c__Eurotiomycetes	o__Chaetothyriales	f__unidentified_Chaetothyriales	g__unidentified_Chaetothyriales	s__unidentified_Chaetothyriales	New.ReferenceOTU170
OTU5660	0	0	0	0	0	0	0	0	0	0	0	0	0	0	0	0	0	0	0	0	0	0	0	0	0	4	0	41	0	5	0	13	0	0	0	0	k__Fungi	p__Ascomycota	c__Eurotiomycetes	o__Chaetothyriales	f__Chaetothyriaceae	g__Cyphellophora	s__unidentified_Cyphellophora	SH015632.07FU_EU035416_refs
OTU4538	0	0	0	0	0	0	0	0	0	0	0	0	0	0	0	0	0	0	0	0	0	0	0	0	0	0	0	10	1	1	0	2	0	0	0	0	k__Fungi	p__Ascomycota	c__Eurotiomycetes	o__Chaetothyriales	f__Chaetothyriaceae	g__Cyphellophora	s__unidentified_Cyphellophora	New.CleanUp.ReferenceOTU89101
OTU4528	0	0	0	0	0	0	0	0	0	0	0	0	0	0	0	0	0	1	0	0	0	0	0	0	0	0	0	0	0	0	0	1	0	0	0	0	k__Fungi	p__Ascomycota	c__Eurotiomycetes	o__Chaetothyriales	f__Chaetothyriaceae	g__Cyphellophora	s__unidentified_Cyphellophora	SH015645.07FU_JQ766428_reps
OTU6384	0	0	0	0	0	0	0	0	0	0	12	36	0	0	0	0	0	0	0	1	0	0	0	0	11	0	0	36	5	8	25	3	0	4	0	0	k__Fungi	p__Ascomycota	c__Eurotiomycetes	o__Chaetothyriales	f__Herpotrichiellaceae	g__unidentified_Herpotrichiellaceae	s__unidentified_Herpotrichiellaceae	New.ReferenceOTU135
OTU5854	0	0	0	0	93	0	0	0	0	0	0	0	0	0	0	0	0	0	0	0	0	0	0	0	0	0	0	0	0	0	0	0	0	0	0	0	k__Fungi	p__Ascomycota	c__Eurotiomycetes	o__Chaetothyriales	f__Herpotrichiellaceae	g__unidentified_Herpotrichiellaceae	s__unidentified_Herpotrichiellaceae	New.CleanUp.ReferenceOTU5353
OTU5484	0	0	3	0	0	2	5	0	0	0	0	2	0	1	8	1	0	4	0	1	0	0	0	0	0	1	0	0	0	0	0	15	0	0	0	0	k__Fungi	p__Ascomycota	c__Eurotiomycetes	o__Chaetothyriales	f__Herpotrichiellaceae	g__unidentified_Herpotrichiellaceae	s__unidentified_Herpotrichiellaceae	SH015491.07FU_HQ446088_reps
OTU5260	0	0	0	6	0	0	6	0	0	0	0	0	0	0	0	0	0	0	0	0	0	0	0	0	0	0	0	0	0	0	0	0	4	0	0	0	k__Fungi	p__Ascomycota	c__Eurotiomycetes	o__Chaetothyriales	f__Herpotrichiellaceae	g__unidentified_Herpotrichiellaceae	s__unidentified_Herpotrichiellaceae	New.CleanUp.ReferenceOTU78427
OTU3981	0	0	0	0	6	2	0	0	0	0	0	0	0	0	0	0	0	0	0	0	0	0	0	0	0	0	0	0	0	0	0	0	0	0	0	0	k__Fungi	p__Ascomycota	c__Eurotiomycetes	o__Chaetothyriales	f__Herpotrichiellaceae	g__unidentified_Herpotrichiellaceae	s__unidentified_Herpotrichiellaceae	New.CleanUp.ReferenceOTU103709
OTU3821	0	0	2	0	0	0	1	2	0	0	0	0	0	0	0	0	0	0	0	0	0	1	0	0	0	0	0	0	0	0	0	0	0	0	1	0	k__Fungi	p__Ascomycota	c__Eurotiomycetes	o__Chaetothyriales	f__Herpotrichiellaceae	g__unidentified_Herpotrichiellaceae	s__unidentified_Herpotrichiellaceae	New.CleanUp.ReferenceOTU113952
OTU3365	0	0	0	0	0	0	1	0	0	0	0	0	0	0	0	0	0	0	0	0	0	0	0	0	3	0	0	0	0	0	0	1	0	0	0	0	k__Fungi	p__Ascomycota	c__Eurotiomycetes	o__Chaetothyriales	f__Herpotrichiellaceae	g__unidentified_Herpotrichiellaceae	s__unidentified_Herpotrichiellaceae	New.CleanUp.ReferenceOTU9154
OTU3584	0	0	0	0	0	0	0	1	1	0	0	1	0	0	1	0	0	0	0	0	0	0	0	0	0	0	0	0	0	0	0	0	0	0	0	1	k__Fungi	p__Ascomycota	c__Eurotiomycetes	o__Chaetothyriales	f__Herpotrichiellaceae	g__unidentified_Herpotrichiellaceae	s__unidentified_Herpotrichiellaceae	SH015503.07FU_HG796879_reps_singleton
OTU2499	0	0	0	0	0	0	1	0	0	0	0	0	0	0	0	0	0	0	0	0	0	0	0	0	0	1	0	0	0	0	0	0	1	0	0	0	k__Fungi	p__Ascomycota	c__Eurotiomycetes	o__Chaetothyriales	f__Herpotrichiellaceae	g__unidentified_Herpotrichiellaceae	s__unidentified_Herpotrichiellaceae	New.CleanUp.ReferenceOTU19842
OTU2529	0	0	0	0	0	1	0	0	0	0	0	0	1	0	0	0	0	0	0	0	0	0	0	0	0	0	0	0	0	1	0	0	0	0	0	0	k__Fungi	p__Ascomycota	c__Eurotiomycetes	o__Chaetothyriales	f__Herpotrichiellaceae	g__unidentified_Herpotrichiellaceae	s__unidentified_Herpotrichiellaceae	New.CleanUp.ReferenceOTU32367
OTU1323	0	0	0	0	0	0	0	0	0	0	0	0	0	0	0	0	0	0	0	0	1	0	0	0	0	1	0	0	0	0	0	0	0	0	0	0	k__Fungi	p__Ascomycota	c__Eurotiomycetes	o__Chaetothyriales	f__Herpotrichiellaceae	g__unidentified_Herpotrichiellaceae	s__unidentified_Herpotrichiellaceae	New.CleanUp.ReferenceOTU21588
OTU1404	0	0	0	0	0	0	1	1	0	0	0	0	0	0	0	0	0	0	0	0	0	0	0	0	0	0	0	0	0	0	0	0	0	0	0	0	k__Fungi	p__Ascomycota	c__Eurotiomycetes	o__Chaetothyriales	f__Herpotrichiellaceae	g__unidentified_Herpotrichiellaceae	s__unidentified_Herpotrichiellaceae	New.CleanUp.ReferenceOTU50145
OTU1521	0	0	0	0	0	0	0	0	0	0	0	1	0	0	0	0	0	0	0	0	0	0	0	0	0	0	0	0	1	0	0	0	0	0	0	0	k__Fungi	p__Ascomycota	c__Eurotiomycetes	o__Chaetothyriales	f__Herpotrichiellaceae	g__unidentified_Herpotrichiellaceae	s__unidentified_Herpotrichiellaceae	New.CleanUp.ReferenceOTU82473
OTU1546	0	0	0	0	0	0	0	0	0	0	0	0	0	1	0	0	0	0	0	0	0	0	0	0	0	0	0	0	0	0	0	0	0	0	1	0	k__Fungi	p__Ascomycota	c__Eurotiomycetes	o__Chaetothyriales	f__Herpotrichiellaceae	g__unidentified_Herpotrichiellaceae	s__unidentified_Herpotrichiellaceae	New.CleanUp.ReferenceOTU92222
OTU1561	0	0	0	0	0	0	0	0	0	1	0	0	0	0	0	0	0	0	0	0	0	0	0	0	0	0	0	0	0	0	0	0	1	0	0	0	k__Fungi	p__Ascomycota	c__Eurotiomycetes	o__Chaetothyriales	f__Herpotrichiellaceae	g__unidentified_Herpotrichiellaceae	s__unidentified_Herpotrichiellaceae	New.CleanUp.ReferenceOTU95171
OTU1593	0	0	0	0	0	0	0	0	1	0	0	0	0	0	0	0	0	0	1	0	0	0	0	0	0	0	0	0	0	0	0	0	0	0	0	0	k__Fungi	p__Ascomycota	c__Eurotiomycetes	o__Chaetothyriales	f__Herpotrichiellaceae	g__unidentified_Herpotrichiellaceae	s__unidentified_Herpotrichiellaceae	New.CleanUp.ReferenceOTU108022
OTU1597	0	0	0	0	0	0	0	0	0	0	0	1	0	0	0	0	0	0	0	0	0	0	0	0	0	1	0	0	0	0	0	0	0	0	0	0	k__Fungi	p__Ascomycota	c__Eurotiomycetes	o__Chaetothyriales	f__Herpotrichiellaceae	g__unidentified_Herpotrichiellaceae	s__unidentified_Herpotrichiellaceae	New.CleanUp.ReferenceOTU108581
OTU1621	0	0	0	0	0	0	0	0	0	0	0	0	1	0	0	0	0	0	0	0	0	0	0	0	0	0	0	0	0	0	0	0	1	0	0	0	k__Fungi	p__Ascomycota	c__Eurotiomycetes	o__Chaetothyriales	f__Herpotrichiellaceae	g__unidentified_Herpotrichiellaceae	s__unidentified_Herpotrichiellaceae	New.CleanUp.ReferenceOTU114488
OTU5192	0	0	0	0	0	0	0	0	0	0	0	0	0	0	0	0	0	0	0	0	0	0	0	0	0	0	0	2	0	0	0	0	0	0	0	0	k__Fungi	p__Ascomycota	c__Eurotiomycetes	o__Chaetothyriales	f__Herpotrichiellaceae	g__unidentified_Herpotrichiellaceae	s__unidentified_Herpotrichiellaceae	New.ReferenceOTU753
OTU29	0	0	0	0	0	0	0	0	0	0	0	0	1	0	0	0	0	0	0	0	0	0	0	0	0	0	0	0	0	0	0	0	0	0	0	0	k__Fungi	p__Ascomycota	c__Eurotiomycetes	o__Chaetothyriales	f__Herpotrichiellaceae	g__unidentified_Herpotrichiellaceae	s__unidentified_Herpotrichiellaceae	SH018799.07FU_JF747040_refs
OTU165	0	0	0	0	0	0	0	0	0	0	0	0	0	0	0	0	0	0	0	0	0	0	0	0	0	0	0	0	0	0	0	0	0	0	0	1	k__Fungi	p__Ascomycota	c__Eurotiomycetes	o__Chaetothyriales	f__Herpotrichiellaceae	g__unidentified_Herpotrichiellaceae	s__unidentified_Herpotrichiellaceae	New.CleanUp.ReferenceOTU7251
OTU245	0	0	0	0	0	0	1	0	0	0	0	0	0	0	0	0	0	0	0	0	0	0	0	0	0	0	0	0	0	0	0	0	0	0	0	0	k__Fungi	p__Ascomycota	c__Eurotiomycetes	o__Chaetothyriales	f__Herpotrichiellaceae	g__unidentified_Herpotrichiellaceae	s__unidentified_Herpotrichiellaceae	New.CleanUp.ReferenceOTU32061
OTU334	0	0	0	0	0	0	0	0	0	0	0	1	0	0	0	0	0	0	0	0	0	0	0	0	0	0	0	0	0	0	0	0	0	0	0	0	k__Fungi	p__Ascomycota	c__Eurotiomycetes	o__Chaetothyriales	f__Herpotrichiellaceae	g__unidentified_Herpotrichiellaceae	s__unidentified_Herpotrichiellaceae	New.CleanUp.ReferenceOTU61179
OTU350	0	0	0	0	1	0	0	0	0	0	0	0	0	0	0	0	0	0	0	0	0	0	0	0	0	0	0	0	0	0	0	0	0	0	0	0	k__Fungi	p__Ascomycota	c__Eurotiomycetes	o__Chaetothyriales	f__Herpotrichiellaceae	g__unidentified_Herpotrichiellaceae	s__unidentified_Herpotrichiellaceae	New.CleanUp.ReferenceOTU65967
OTU363	0	0	0	0	0	0	0	0	0	0	0	0	1	0	0	0	0	0	0	0	0	0	0	0	0	0	0	0	0	0	0	0	0	0	0	0	k__Fungi	p__Ascomycota	c__Eurotiomycetes	o__Chaetothyriales	f__Herpotrichiellaceae	g__unidentified_Herpotrichiellaceae	s__unidentified_Herpotrichiellaceae	New.CleanUp.ReferenceOTU70104
OTU371	0	0	1	0	0	0	0	0	0	0	0	0	0	0	0	0	0	0	0	0	0	0	0	0	0	0	0	0	0	0	0	0	0	0	0	0	k__Fungi	p__Ascomycota	c__Eurotiomycetes	o__Chaetothyriales	f__Herpotrichiellaceae	g__unidentified_Herpotrichiellaceae	s__unidentified_Herpotrichiellaceae	New.CleanUp.ReferenceOTU71925
OTU479	0	0	0	0	0	0	0	0	0	0	0	1	0	0	0	0	0	0	0	0	0	0	0	0	0	0	0	0	0	0	0	0	0	0	0	0	k__Fungi	p__Ascomycota	c__Eurotiomycetes	o__Chaetothyriales	f__Herpotrichiellaceae	g__unidentified_Herpotrichiellaceae	s__unidentified_Herpotrichiellaceae	New.CleanUp.ReferenceOTU102756
OTU496	0	0	0	0	0	0	0	0	0	0	0	1	0	0	0	0	0	0	0	0	0	0	0	0	0	0	0	0	0	0	0	0	0	0	0	0	k__Fungi	p__Ascomycota	c__Eurotiomycetes	o__Chaetothyriales	f__Herpotrichiellaceae	g__unidentified_Herpotrichiellaceae	s__unidentified_Herpotrichiellaceae	New.CleanUp.ReferenceOTU108785
OTU544	0	0	0	0	0	0	0	0	0	0	0	1	0	0	0	0	0	0	0	0	0	0	0	0	0	0	0	0	0	0	0	0	0	0	0	0	k__Fungi	p__Ascomycota	c__Eurotiomycetes	o__Chaetothyriales	f__Herpotrichiellaceae	g__unidentified_Herpotrichiellaceae	s__unidentified_Herpotrichiellaceae	New.CleanUp.ReferenceOTU122068
OTU1506	0	0	0	0	0	0	0	1	0	0	0	0	0	0	0	0	0	0	0	0	0	0	0	0	0	0	0	0	0	0	0	0	0	0	0	0	k__Fungi	p__Ascomycota	c__Eurotiomycetes	o__Chaetothyriales	f__Herpotrichiellaceae	g__unidentified_Herpotrichiellaceae	s__unidentified_Herpotrichiellaceae	New.CleanUp.ReferenceOTU78664
OTU5396	0	0	0	0	0	0	0	0	0	0	0	0	37	0	0	0	2	2	0	0	0	0	0	0	0	0	0	0	0	0	0	0	0	0	0	0	k__Fungi	p__Ascomycota	c__Eurotiomycetes	o__Chaetothyriales	f__Herpotrichiellaceae	g__Capronia	s__Capronia_fungicola	New.CleanUp.ReferenceOTU71900
OTU4369	7	4	1	0	0	0	0	0	0	0	0	0	0	0	0	0	0	0	0	0	0	0	0	0	0	0	0	0	0	0	0	0	0	0	0	0	k__Fungi	p__Ascomycota	c__Eurotiomycetes	o__Chaetothyriales	f__Herpotrichiellaceae	g__Capronia	s__unidentified_Capronia	SH007166.07FU_GQ223468_reps_singleton
OTU4214	0	0	1	0	0	2	0	6	0	0	0	0	0	0	0	0	0	0	0	0	0	0	0	0	0	0	0	1	0	0	0	0	0	0	0	0	k__Fungi	p__Ascomycota	c__Eurotiomycetes	o__Chaetothyriales	f__Herpotrichiellaceae	g__Capronia	s__unidentified_Capronia	New.CleanUp.ReferenceOTU114617
OTU31	0	0	1	0	0	0	0	0	0	0	0	0	0	0	0	0	0	0	0	0	0	0	0	0	0	0	0	0	0	0	0	0	0	0	0	0	k__Fungi	p__Ascomycota	c__Eurotiomycetes	o__Chaetothyriales	f__Herpotrichiellaceae	g__Capronia	s__unidentified_Capronia	SH022459.07FU_EU139150_reps_singleton
OTU372	0	0	0	0	0	0	0	0	0	0	0	0	0	0	0	0	0	1	0	0	0	0	0	0	0	0	0	0	0	0	0	0	0	0	0	0	k__Fungi	p__Ascomycota	c__Eurotiomycetes	o__Chaetothyriales	f__Herpotrichiellaceae	g__Capronia	s__unidentified_Capronia	New.CleanUp.ReferenceOTU72278
OTU6202	0	0	5	1	1	0	26	0	12	0	4	44	0	0	0	0	0	0	0	0	0	0	0	0	0	0	0	39	3	0	7	4	5	0	14	13	k__Fungi	p__Ascomycota	c__Eurotiomycetes	o__Chaetothyriales	f__Herpotrichiellaceae	g__Cladophialophora	s__unidentified_Cladophialophora	SH026632.07FU_EU035405_refs
OTU6051	0	5	0	0	0	0	2	0	0	0	0	0	0	0	0	0	0	0	0	0	0	0	0	0	22	11	3	14	29	8	5	8	0	0	0	0	k__Fungi	p__Ascomycota	c__Eurotiomycetes	o__Chaetothyriales	f__Herpotrichiellaceae	g__Cladophialophora	s__unidentified_Cladophialophora	New.ReferenceOTU745
OTU5691	0	0	20	17	0	0	0	0	0	0	0	0	0	0	0	0	0	0	0	0	0	0	0	0	0	0	0	0	0	0	0	0	0	0	0	0	k__Fungi	p__Ascomycota	c__Eurotiomycetes	o__Chaetothyriales	f__Herpotrichiellaceae	g__Cladophialophora	s__unidentified_Cladophialophora	SH479715.07FU_HF674573_reps_singleton
OTU4823	3	0	0	0	8	0	1	0	0	0	0	0	0	0	0	0	0	0	0	0	0	0	0	0	0	1	2	4	0	0	0	0	0	0	0	0	k__Fungi	p__Ascomycota	c__Eurotiomycetes	o__Chaetothyriales	f__Herpotrichiellaceae	g__Cladophialophora	s__unidentified_Cladophialophora	SH026692.07FU_UDB020765_reps_singleton
OTU4705	0	0	0	0	0	0	0	0	0	0	0	0	0	0	0	0	0	0	0	0	0	0	0	0	2	0	0	6	3	0	1	1	0	0	0	0	k__Fungi	p__Ascomycota	c__Eurotiomycetes	o__Chaetothyriales	f__Herpotrichiellaceae	g__Cladophialophora	s__unidentified_Cladophialophora	New.CleanUp.ReferenceOTU49885
OTU263	0	0	0	0	1	0	0	0	0	0	0	0	0	0	0	0	0	0	0	0	0	0	0	0	0	0	0	0	0	0	0	0	0	0	0	0	k__Fungi	p__Ascomycota	c__Eurotiomycetes	o__Chaetothyriales	f__Herpotrichiellaceae	g__Cladophialophora	s__unidentified_Cladophialophora	New.CleanUp.ReferenceOTU37714
OTU280	0	0	0	0	0	0	0	0	0	0	0	0	0	0	0	0	0	0	0	0	0	0	0	0	1	0	0	0	0	0	0	0	0	0	0	0	k__Fungi	p__Ascomycota	c__Eurotiomycetes	o__Chaetothyriales	f__Herpotrichiellaceae	g__Cladophialophora	s__unidentified_Cladophialophora	New.CleanUp.ReferenceOTU45141
OTU351	0	0	0	0	0	0	0	0	0	0	0	0	0	0	0	0	0	0	0	0	0	0	0	0	0	0	0	0	0	1	0	0	0	0	0	0	k__Fungi	p__Ascomycota	c__Eurotiomycetes	o__Chaetothyriales	f__Herpotrichiellaceae	g__Cladophialophora	s__unidentified_Cladophialophora	New.CleanUp.ReferenceOTU66200
OTU4269	0	0	0	0	0	0	2	0	0	0	0	0	0	0	3	0	0	0	0	0	0	0	0	0	0	0	0	0	1	0	0	2	0	0	0	0	k__Fungi	p__Ascomycota	c__Eurotiomycetes	o__Chaetothyriales	f__Herpotrichiellaceae	g__Cladophialophora	s__Cladophialophora_chaetospira	SH026638.07FU_AY843201_reps
OTU6442	4	0	12	6	4	6	49	4	0	0	0	4	0	2	2	1	0	18	0	7	0	0	0	0	26	5	6	10	51	15	8	30	0	8	0	1	k__Fungi	p__Ascomycota	c__Eurotiomycetes	o__Chaetothyriales	f__Herpotrichiellaceae	g__Cladophialophora	s__unidentified_Cladophialophora	SH026648.07FU_DQ124131_reps
OTU6367	3	7	3	5	14	5	39	0	0	0	0	97	0	0	0	0	0	7	0	6	0	0	0	0	20	2	0	4	46	4	2	1	0	0	0	0	k__Fungi	p__Ascomycota	c__Eurotiomycetes	o__Chaetothyriales	f__Herpotrichiellaceae	g__Cladophialophora	s__unidentified_Cladophialophora	SH026633.07FU_GU083193_reps
OTU5344	0	2	0	2	0	0	4	0	0	0	0	0	0	8	0	4	0	8	0	7	0	0	0	0	0	0	0	0	0	0	0	0	0	0	0	0	k__Fungi	p__Ascomycota	c__Eurotiomycetes	o__Chaetothyriales	f__Herpotrichiellaceae	g__Cladophialophora	s__unidentified_Cladophialophora	New.CleanUp.ReferenceOTU51909
OTU3620	0	0	0	0	0	0	0	0	0	0	0	0	0	6	0	0	0	0	0	0	0	0	0	0	0	0	0	0	0	0	0	0	0	0	0	0	k__Fungi	p__Ascomycota	c__Eurotiomycetes	o__Chaetothyriales	f__Herpotrichiellaceae	g__Cladophialophora	s__unidentified_Cladophialophora	New.CleanUp.ReferenceOTU53696
OTU2633	0	0	0	0	0	0	0	0	0	0	0	0	0	3	0	0	0	0	0	0	0	0	0	0	0	0	0	0	0	0	0	0	0	0	0	0	k__Fungi	p__Ascomycota	c__Eurotiomycetes	o__Chaetothyriales	f__Herpotrichiellaceae	g__Cladophialophora	s__unidentified_Cladophialophora	New.CleanUp.ReferenceOTU114555
OTU1262	0	0	0	0	2	0	0	0	0	0	0	0	0	0	0	0	0	0	0	0	0	0	0	0	0	0	0	0	0	0	0	0	0	0	0	0	k__Fungi	p__Ascomycota	c__Eurotiomycetes	o__Chaetothyriales	f__Herpotrichiellaceae	g__Cladophialophora	s__unidentified_Cladophialophora	New.ReferenceOTU760
OTU4066	0	0	0	0	1	0	1	0	0	0	0	0	0	0	0	0	0	0	0	0	0	0	0	0	0	0	0	0	0	0	0	0	0	0	0	0	k__Fungi	p__Ascomycota	c__Eurotiomycetes	o__Chaetothyriales	f__Herpotrichiellaceae	g__Cladophialophora	s__unidentified_Cladophialophora	SH491437.07FU_AB986341_reps
OTU78	0	0	0	0	0	0	0	0	0	0	0	0	0	0	0	0	0	0	1	0	0	0	0	0	0	0	0	0	0	0	0	0	0	0	0	0	k__Fungi	p__Ascomycota	c__Eurotiomycetes	o__Chaetothyriales	f__Herpotrichiellaceae	g__Cladophialophora	s__unidentified_Cladophialophora	SH491438.07FU_AB986346_reps
OTU320	0	0	0	0	0	0	0	0	0	0	0	0	0	0	0	0	0	1	0	0	0	0	0	0	0	0	0	0	0	0	0	0	0	0	0	0	k__Fungi	p__Ascomycota	c__Eurotiomycetes	o__Chaetothyriales	f__Herpotrichiellaceae	g__Cladophialophora	s__unidentified_Cladophialophora	New.CleanUp.ReferenceOTU57696
OTU379	0	0	0	0	0	0	0	0	0	0	0	0	0	0	0	0	0	0	0	1	0	0	0	0	0	0	0	0	0	0	0	0	0	0	0	0	k__Fungi	p__Ascomycota	c__Eurotiomycetes	o__Chaetothyriales	f__Herpotrichiellaceae	g__Cladophialophora	s__unidentified_Cladophialophora	New.CleanUp.ReferenceOTU74309
OTU398	0	0	0	0	0	0	1	0	0	0	0	0	0	0	0	0	0	0	0	0	0	0	0	0	0	0	0	0	0	0	0	0	0	0	0	0	k__Fungi	p__Ascomycota	c__Eurotiomycetes	o__Chaetothyriales	f__Herpotrichiellaceae	g__Cladophialophora	s__unidentified_Cladophialophora	New.CleanUp.ReferenceOTU78999
OTU406	0	0	0	0	0	0	0	0	0	0	0	0	0	0	0	0	0	0	0	1	0	0	0	0	0	0	0	0	0	0	0	0	0	0	0	0	k__Fungi	p__Ascomycota	c__Eurotiomycetes	o__Chaetothyriales	f__Herpotrichiellaceae	g__Cladophialophora	s__unidentified_Cladophialophora	New.CleanUp.ReferenceOTU81482
OTU471	0	0	0	0	0	0	0	0	0	0	0	0	0	0	0	0	0	0	0	0	0	0	0	0	1	0	0	0	0	0	0	0	0	0	0	0	k__Fungi	p__Ascomycota	c__Eurotiomycetes	o__Chaetothyriales	f__Herpotrichiellaceae	g__Cladophialophora	s__unidentified_Cladophialophora	New.CleanUp.ReferenceOTU100853
OTU508	0	0	0	0	0	0	0	0	0	0	0	0	0	1	0	0	0	0	0	0	0	0	0	0	0	0	0	0	0	0	0	0	0	0	0	0	k__Fungi	p__Ascomycota	c__Eurotiomycetes	o__Chaetothyriales	f__Herpotrichiellaceae	g__Cladophialophora	s__unidentified_Cladophialophora	New.CleanUp.ReferenceOTU112511
OTU6379	17	0	0	0	0	6	5	0	14	0	6	64	0	38	3	0	0	8	6	0	16	5	0	5	0	2	1	32	1	2	10	6	4	0	2	7	k__Fungi	p__Ascomycota	c__Eurotiomycetes	o__Chaetothyriales	f__Herpotrichiellaceae	g__Exophiala	s__unidentified_Exophiala	SH015486.07FU_JF747124_reps
OTU5546	2	0	0	0	0	0	0	0	0	5	1	12	0	3	5	0	0	0	4	0	0	1	0	1	0	1	0	2	0	1	2	5	2	1	2	0	k__Fungi	p__Ascomycota	c__Eurotiomycetes	o__Chaetothyriales	f__Herpotrichiellaceae	g__Exophiala	s__unidentified_Exophiala	New.CleanUp.ReferenceOTU28238
OTU4696	0	0	0	0	0	0	0	0	0	0	0	0	0	0	0	0	0	0	0	0	0	0	0	0	2	0	3	7	1	0	0	1	1	0	0	0	k__Fungi	p__Ascomycota	c__Eurotiomycetes	o__Chaetothyriales	f__Herpotrichiellaceae	g__Exophiala	s__unidentified_Exophiala	New.CleanUp.ReferenceOTU13115
OTU3936	0	0	4	0	0	0	0	0	0	0	0	0	0	0	0	0	0	0	0	0	0	0	0	0	2	1	0	0	0	0	0	0	0	0	0	0	k__Fungi	p__Ascomycota	c__Eurotiomycetes	o__Chaetothyriales	f__Herpotrichiellaceae	g__Exophiala	s__unidentified_Exophiala	SH015492.07FU_JQ070491_reps
OTU3585	0	0	1	0	0	0	0	0	0	0	0	0	0	0	0	0	0	1	0	0	0	1	1	0	0	0	0	0	2	0	0	0	0	0	0	0	k__Fungi	p__Ascomycota	c__Eurotiomycetes	o__Chaetothyriales	f__Herpotrichiellaceae	g__Exophiala	s__unidentified_Exophiala	SH015500.07FU_AF050276_reps_singleton
OTU3092	0	0	0	1	1	0	0	0	0	0	0	0	1	0	0	1	0	0	0	0	0	0	0	0	0	0	0	0	0	0	0	0	0	0	0	0	k__Fungi	p__Ascomycota	c__Eurotiomycetes	o__Chaetothyriales	f__Herpotrichiellaceae	g__Exophiala	s__unidentified_Exophiala	New.CleanUp.ReferenceOTU79600
OTU1269	0	0	0	0	0	0	0	0	0	0	0	0	0	0	0	0	0	0	0	0	0	0	0	0	0	0	0	0	1	0	0	1	0	0	0	0	k__Fungi	p__Ascomycota	c__Eurotiomycetes	o__Chaetothyriales	f__Herpotrichiellaceae	g__Exophiala	s__unidentified_Exophiala	New.CleanUp.ReferenceOTU2081
OTU1337	0	0	0	0	0	0	0	0	0	0	0	1	0	0	0	0	0	0	0	0	0	0	0	0	0	0	0	0	0	0	0	0	0	0	1	0	k__Fungi	p__Ascomycota	c__Eurotiomycetes	o__Chaetothyriales	f__Herpotrichiellaceae	g__Exophiala	s__unidentified_Exophiala	New.CleanUp.ReferenceOTU25463
OTU1468	0	0	0	0	0	0	1	0	0	0	0	0	0	0	0	0	0	0	0	0	0	0	0	0	0	0	0	0	0	1	0	0	0	0	0	0	k__Fungi	p__Ascomycota	c__Eurotiomycetes	o__Chaetothyriales	f__Herpotrichiellaceae	g__Exophiala	s__unidentified_Exophiala	New.CleanUp.ReferenceOTU70150
OTU1477	0	0	0	0	0	0	0	0	0	0	0	0	0	0	0	0	0	0	0	0	0	0	1	0	0	0	0	0	1	0	0	0	0	0	0	0	k__Fungi	p__Ascomycota	c__Eurotiomycetes	o__Chaetothyriales	f__Herpotrichiellaceae	g__Exophiala	s__unidentified_Exophiala	New.CleanUp.ReferenceOTU72034
OTU195	0	1	0	0	0	0	0	0	0	0	0	0	0	0	0	0	0	0	0	0	0	0	0	0	0	0	0	0	0	0	0	0	0	0	0	0	k__Fungi	p__Ascomycota	c__Eurotiomycetes	o__Chaetothyriales	f__Herpotrichiellaceae	g__Exophiala	s__unidentified_Exophiala	New.CleanUp.ReferenceOTU16122
OTU256	0	0	1	0	0	0	0	0	0	0	0	0	0	0	0	0	0	0	0	0	0	0	0	0	0	0	0	0	0	0	0	0	0	0	0	0	k__Fungi	p__Ascomycota	c__Eurotiomycetes	o__Chaetothyriales	f__Herpotrichiellaceae	g__Exophiala	s__unidentified_Exophiala	New.CleanUp.ReferenceOTU35294
OTU407	0	0	0	0	0	0	0	0	0	0	0	0	0	0	0	0	0	0	0	0	0	0	0	0	0	0	0	0	1	0	0	0	0	0	0	0	k__Fungi	p__Ascomycota	c__Eurotiomycetes	o__Chaetothyriales	f__Herpotrichiellaceae	g__Exophiala	s__unidentified_Exophiala	New.CleanUp.ReferenceOTU81827
OTU504	0	0	0	0	0	0	0	0	0	0	0	0	0	0	0	0	0	0	0	0	0	0	0	0	0	1	0	0	0	0	0	0	0	0	0	0	k__Fungi	p__Ascomycota	c__Eurotiomycetes	o__Chaetothyriales	f__Herpotrichiellaceae	g__Exophiala	s__unidentified_Exophiala	New.CleanUp.ReferenceOTU110703
OTU1502	1	0	0	0	0	0	0	0	0	0	0	0	0	0	0	0	0	0	0	0	0	0	0	0	0	0	0	0	0	0	0	0	0	0	0	0	k__Fungi	p__Ascomycota	c__Eurotiomycetes	o__Chaetothyriales	f__Herpotrichiellaceae	g__Exophiala	s__unidentified_Exophiala	New.CleanUp.ReferenceOTU77771
OTU5362	18	17	0	0	0	0	0	0	0	0	0	0	0	0	0	0	0	0	5	0	0	0	0	0	0	0	0	0	0	0	0	0	0	0	0	0	k__Fungi	p__Ascomycota	c__Eurotiomycetes	o__Chaetothyriales	f__Herpotrichiellaceae	g__Exophiala	s__Exophiala_angulospora	New.CleanUp.ReferenceOTU25538
OTU4079	3	6	0	0	0	0	0	0	0	0	0	0	0	0	0	0	0	0	0	0	0	0	0	0	0	0	0	0	0	0	0	0	0	0	0	0	k__Fungi	p__Ascomycota	c__Eurotiomycetes	o__Chaetothyriales	f__Herpotrichiellaceae	g__Exophiala	s__Exophiala_angulospora	New.CleanUp.ReferenceOTU7279
OTU5380	5	0	0	0	2	0	1	0	0	0	0	0	0	0	0	0	0	0	0	0	0	0	0	0	8	4	0	3	4	9	0	3	0	0	0	0	k__Fungi	p__Ascomycota	c__Eurotiomycetes	o__Chaetothyriales	f__Herpotrichiellaceae	g__Exophiala	s__Exophiala_moniliae	New.CleanUp.ReferenceOTU113822
OTU5378	0	0	0	0	0	0	0	0	0	0	0	0	0	4	0	0	8	2	0	0	0	0	0	0	4	0	0	1	9	2	3	2	0	0	0	0	k__Fungi	p__Ascomycota	c__Eurotiomycetes	o__Chaetothyriales	f__Herpotrichiellaceae	g__Exophiala	s__Exophiala_moniliae	New.CleanUp.ReferenceOTU62564
OTU4966	0	0	0	0	0	2	0	0	0	0	0	0	0	0	0	0	12	0	0	0	0	0	0	0	4	0	0	0	3	2	0	0	0	0	0	0	k__Fungi	p__Ascomycota	c__Eurotiomycetes	o__Chaetothyriales	f__Herpotrichiellaceae	g__Exophiala	s__Exophiala_moniliae	SH016576.07FU_HE605213_reps
OTU3599	0	0	0	0	0	0	0	0	0	0	0	0	0	0	0	1	0	0	0	0	0	0	0	0	3	2	0	0	0	0	0	0	0	0	0	0	k__Fungi	p__Ascomycota	c__Eurotiomycetes	o__Chaetothyriales	f__Herpotrichiellaceae	g__Exophiala	s__Exophiala_moniliae	SH016577.07FU_GU225948_refs
OTU254	0	0	0	0	0	0	0	0	0	0	0	0	0	0	0	0	0	0	0	0	0	0	0	0	1	0	0	0	0	0	0	0	0	0	0	0	k__Fungi	p__Ascomycota	c__Eurotiomycetes	o__Chaetothyriales	f__Herpotrichiellaceae	g__Exophiala	s__Exophiala_moniliae	New.CleanUp.ReferenceOTU35240
OTU305	0	0	0	0	0	0	0	0	0	0	0	0	0	0	0	0	0	0	0	0	0	0	0	0	1	0	0	0	0	0	0	0	0	0	0	0	k__Fungi	p__Ascomycota	c__Eurotiomycetes	o__Chaetothyriales	f__Herpotrichiellaceae	g__Exophiala	s__Exophiala_salmonis	New.CleanUp.ReferenceOTU53682
OTU2450	0	0	0	0	0	0	0	0	0	0	0	0	0	0	0	0	0	0	0	0	0	3	0	0	0	0	0	0	0	0	0	0	0	0	0	0	k__Fungi	p__Ascomycota	c__Eurotiomycetes	o__Chaetothyriales	f__Herpotrichiellaceae	g__Phialophora	s__Phialophora_livistonae	SH026603.07FU_KC005774_refs
OTU6852	109	51	17	86	7	3	54	41	33	6	0	183	123	30	25	105	5	7	1	4	48	18	38	226	2	1	2	6	3	4	7	1	61	67	20	6	k__Fungi	p__Ascomycota	c__Eurotiomycetes	o__Chaetothyriales	f__Herpotrichiellaceae	g__unidentified_Herpotrichiellaceae	s__unidentified_Herpotrichiellaceae	SH495089.07FU_HG937082_reps_singleton
OTU6068	0	0	0	0	0	0	0	0	0	9	28	5	0	0	0	0	0	0	0	0	25	42	38	0	0	0	0	0	0	0	0	0	0	0	0	0	k__Fungi	p__Ascomycota	c__Eurotiomycetes	o__Chaetothyriales	f__Herpotrichiellaceae	g__unidentified_Herpotrichiellaceae	s__unidentified_Herpotrichiellaceae	New.CleanUp.ReferenceOTU4681
OTU6071	0	0	0	1	0	0	34	10	0	65	19	1	0	0	0	0	0	0	0	0	0	8	4	0	0	0	0	0	0	0	0	0	0	0	0	0	k__Fungi	p__Ascomycota	c__Eurotiomycetes	o__Chaetothyriales	f__Herpotrichiellaceae	g__unidentified_Herpotrichiellaceae	s__unidentified_Herpotrichiellaceae	New.CleanUp.ReferenceOTU99646
OTU5559	0	0	0	0	0	0	6	0	4	14	21	0	0	0	0	0	0	0	0	0	0	6	3	0	0	0	0	0	0	0	0	0	0	0	0	0	k__Fungi	p__Ascomycota	c__Eurotiomycetes	o__Chaetothyriales	f__Herpotrichiellaceae	g__unidentified_Herpotrichiellaceae	s__unidentified_Herpotrichiellaceae	New.ReferenceOTU112
OTU5118	0	0	0	0	0	0	0	0	0	0	0	2	0	0	0	0	0	0	0	0	2	22	3	0	0	0	0	0	0	0	0	0	0	0	0	0	k__Fungi	p__Ascomycota	c__Eurotiomycetes	o__Chaetothyriales	f__Herpotrichiellaceae	g__unidentified_Herpotrichiellaceae	s__unidentified_Herpotrichiellaceae	New.CleanUp.ReferenceOTU32908
OTU4940	0	0	0	0	0	0	0	0	0	0	0	0	0	0	0	0	0	0	0	0	0	0	0	0	2	5	2	3	8	2	0	1	0	0	0	0	k__Fungi	p__Ascomycota	c__Eurotiomycetes	o__Chaetothyriales	f__Herpotrichiellaceae	g__unidentified_Herpotrichiellaceae	s__unidentified_Herpotrichiellaceae	New.CleanUp.ReferenceOTU84387
OTU4875	0	0	0	0	0	0	0	0	0	0	20	1	0	0	0	0	0	0	0	0	0	0	0	0	0	0	0	0	0	0	0	0	0	0	0	0	k__Fungi	p__Ascomycota	c__Eurotiomycetes	o__Chaetothyriales	f__Herpotrichiellaceae	g__unidentified_Herpotrichiellaceae	s__unidentified_Herpotrichiellaceae	New.CleanUp.ReferenceOTU107110
OTU4400	0	0	0	0	0	0	0	0	0	0	8	4	0	0	0	0	0	0	0	0	0	0	0	0	0	0	0	0	0	0	0	0	0	0	0	0	k__Fungi	p__Ascomycota	c__Eurotiomycetes	o__Chaetothyriales	f__Herpotrichiellaceae	g__unidentified_Herpotrichiellaceae	s__unidentified_Herpotrichiellaceae	New.CleanUp.ReferenceOTU116186
OTU3787	0	0	0	0	0	0	2	0	0	0	0	1	0	0	0	0	0	0	0	0	0	1	1	0	0	0	0	0	0	2	0	0	0	0	0	0	k__Fungi	p__Ascomycota	c__Eurotiomycetes	o__Chaetothyriales	f__Herpotrichiellaceae	g__unidentified_Herpotrichiellaceae	s__unidentified_Herpotrichiellaceae	New.CleanUp.ReferenceOTU21166
OTU3646	0	0	0	0	0	0	0	0	0	0	0	0	6	0	0	0	0	0	0	0	0	0	0	0	0	0	0	0	0	0	0	0	0	0	0	0	k__Fungi	p__Ascomycota	c__Eurotiomycetes	o__Chaetothyriales	f__Herpotrichiellaceae	g__unidentified_Herpotrichiellaceae	s__unidentified_Herpotrichiellaceae	New.CleanUp.ReferenceOTU107473
OTU2501	0	0	0	0	0	0	0	0	0	0	0	0	0	0	0	0	0	0	0	0	0	0	0	0	0	0	0	1	0	0	0	2	0	0	0	0	k__Fungi	p__Ascomycota	c__Eurotiomycetes	o__Chaetothyriales	f__Herpotrichiellaceae	g__unidentified_Herpotrichiellaceae	s__unidentified_Herpotrichiellaceae	New.CleanUp.ReferenceOTU20744
OTU1294	0	0	0	0	0	0	0	0	0	2	0	0	0	0	0	0	0	0	0	0	0	0	0	0	0	0	0	0	0	0	0	0	0	0	0	0	k__Fungi	p__Ascomycota	c__Eurotiomycetes	o__Chaetothyriales	f__Herpotrichiellaceae	g__unidentified_Herpotrichiellaceae	s__unidentified_Herpotrichiellaceae	New.CleanUp.ReferenceOTU9890
OTU1375	0	0	0	0	0	0	0	0	0	0	1	1	0	0	0	0	0	0	0	0	0	0	0	0	0	0	0	0	0	0	0	0	0	0	0	0	k__Fungi	p__Ascomycota	c__Eurotiomycetes	o__Chaetothyriales	f__Herpotrichiellaceae	g__unidentified_Herpotrichiellaceae	s__unidentified_Herpotrichiellaceae	New.CleanUp.ReferenceOTU38870
OTU1481	0	0	0	0	0	0	0	0	0	0	0	0	0	0	0	0	0	0	0	0	0	0	0	0	0	0	0	0	2	0	0	0	0	0	0	0	k__Fungi	p__Ascomycota	c__Eurotiomycetes	o__Chaetothyriales	f__Herpotrichiellaceae	g__unidentified_Herpotrichiellaceae	s__unidentified_Herpotrichiellaceae	New.CleanUp.ReferenceOTU73367
OTU1483	0	0	0	0	0	0	0	2	0	0	0	0	0	0	0	0	0	0	0	0	0	0	0	0	0	0	0	0	0	0	0	0	0	0	0	0	k__Fungi	p__Ascomycota	c__Eurotiomycetes	o__Chaetothyriales	f__Herpotrichiellaceae	g__unidentified_Herpotrichiellaceae	s__unidentified_Herpotrichiellaceae	New.CleanUp.ReferenceOTU73736
OTU1488	0	1	0	0	0	0	0	0	0	0	0	0	0	0	0	0	0	0	0	0	0	0	0	0	0	0	0	0	0	0	0	0	0	0	1	0	k__Fungi	p__Ascomycota	c__Eurotiomycetes	o__Chaetothyriales	f__Herpotrichiellaceae	g__unidentified_Herpotrichiellaceae	s__unidentified_Herpotrichiellaceae	New.CleanUp.ReferenceOTU74302
OTU69	0	0	0	0	0	0	0	0	0	0	0	0	0	0	0	0	0	0	0	0	0	0	0	0	0	0	1	0	0	0	0	0	0	0	0	0	k__Fungi	p__Ascomycota	c__Eurotiomycetes	o__Chaetothyriales	f__Herpotrichiellaceae	g__unidentified_Herpotrichiellaceae	s__unidentified_Herpotrichiellaceae	SH002124.07FU_AF050240_reps
OTU125	0	1	0	0	0	0	0	0	0	0	0	0	0	0	0	0	0	0	0	0	0	0	0	0	0	0	0	0	0	0	0	0	0	0	0	0	k__Fungi	p__Ascomycota	c__Eurotiomycetes	o__Chaetothyriales	f__Herpotrichiellaceae	g__unidentified_Herpotrichiellaceae	s__unidentified_Herpotrichiellaceae	SH029986.07FU_FJ475797_reps
OTU129	0	0	0	0	1	0	0	0	0	0	0	0	0	0	0	0	0	0	0	0	0	0	0	0	0	0	0	0	0	0	0	0	0	0	0	0	k__Fungi	p__Ascomycota	c__Eurotiomycetes	o__Chaetothyriales	f__Herpotrichiellaceae	g__unidentified_Herpotrichiellaceae	s__unidentified_Herpotrichiellaceae	New.ReferenceOTU962
OTU135	0	0	0	0	0	0	0	0	0	1	0	0	0	0	0	0	0	0	0	0	0	0	0	0	0	0	0	0	0	0	0	0	0	0	0	0	k__Fungi	p__Ascomycota	c__Eurotiomycetes	o__Chaetothyriales	f__Herpotrichiellaceae	g__unidentified_Herpotrichiellaceae	s__unidentified_Herpotrichiellaceae	New.CleanUp.ReferenceOTU163
OTU229	0	0	1	0	0	0	0	0	0	0	0	0	0	0	0	0	0	0	0	0	0	0	0	0	0	0	0	0	0	0	0	0	0	0	0	0	k__Fungi	p__Ascomycota	c__Eurotiomycetes	o__Chaetothyriales	f__Herpotrichiellaceae	g__unidentified_Herpotrichiellaceae	s__unidentified_Herpotrichiellaceae	New.CleanUp.ReferenceOTU25098
OTU318	0	0	0	0	0	0	0	1	0	0	0	0	0	0	0	0	0	0	0	0	0	0	0	0	0	0	0	0	0	0	0	0	0	0	0	0	k__Fungi	p__Ascomycota	c__Eurotiomycetes	o__Chaetothyriales	f__Herpotrichiellaceae	g__unidentified_Herpotrichiellaceae	s__unidentified_Herpotrichiellaceae	New.CleanUp.ReferenceOTU57511
OTU412	0	0	0	0	0	0	0	1	0	0	0	0	0	0	0	0	0	0	0	0	0	0	0	0	0	0	0	0	0	0	0	0	0	0	0	0	k__Fungi	p__Ascomycota	c__Eurotiomycetes	o__Chaetothyriales	f__Herpotrichiellaceae	g__unidentified_Herpotrichiellaceae	s__unidentified_Herpotrichiellaceae	New.CleanUp.ReferenceOTU83352
OTU489	0	0	0	0	1	0	0	0	0	0	0	0	0	0	0	0	0	0	0	0	0	0	0	0	0	0	0	0	0	0	0	0	0	0	0	0	k__Fungi	p__Ascomycota	c__Eurotiomycetes	o__Chaetothyriales	f__Herpotrichiellaceae	g__unidentified_Herpotrichiellaceae	s__unidentified_Herpotrichiellaceae	New.CleanUp.ReferenceOTU107272
OTU505	0	0	0	0	0	0	0	0	0	0	0	0	0	0	0	0	0	0	0	0	0	0	0	0	0	0	0	0	1	0	0	0	0	0	0	0	k__Fungi	p__Ascomycota	c__Eurotiomycetes	o__Chaetothyriales	f__Herpotrichiellaceae	g__unidentified_Herpotrichiellaceae	s__unidentified_Herpotrichiellaceae	New.CleanUp.ReferenceOTU111085
OTU548	0	0	0	0	0	0	0	0	0	0	0	0	1	0	0	0	0	0	0	0	0	0	0	0	0	0	0	0	0	0	0	0	0	0	0	0	k__Fungi	p__Ascomycota	c__Eurotiomycetes	o__Chaetothyriales	f__Herpotrichiellaceae	g__unidentified_Herpotrichiellaceae	s__unidentified_Herpotrichiellaceae	New.CleanUp.ReferenceOTU122646
OTU7012	1431	602	1441	475	238	516	3260	862	869	296	884	2602	2915	380	105	256	460	1133	312	460	352	1057	3465	3	726	1677	221	335	3013	735	421	993	551	492	546	203	k__Fungi	p__Ascomycota	c__Eurotiomycetes	o__Chaetothyriales	f__Herpotrichiellaceae	g__unidentified_Herpotrichiellaceae	s__unidentified_Herpotrichiellaceae	SH015483.07FU_JF747094_refs
OTU6730	0	0	0	0	2	14	3	0	27	5	0	4	0	0	0	0	0	0	0	0	0	0	0	0	0	14	43	149	2	26	63	125	258	47	29	120	k__Fungi	p__Ascomycota	c__Eurotiomycetes	o__Chaetothyriales	f__unidentified_Chaetothyriales	g__unidentified_Chaetothyriales	s__unidentified_Chaetothyriales	New.ReferenceOTU378
OTU6634	0	0	0	0	0	0	0	0	0	0	0	0	0	0	0	0	0	0	0	0	0	0	0	0	49	111	20	16	113	146	124	127	0	0	0	0	k__Fungi	p__Ascomycota	c__Eurotiomycetes	o__Chaetothyriales	f__unidentified_Chaetothyriales	g__unidentified_Chaetothyriales	s__unidentified_Chaetothyriales	New.ReferenceOTU50
OTU6376	0	0	0	2	0	0	9	116	0	87	13	12	12	0	0	0	0	0	0	0	7	19	16	0	0	0	0	0	0	0	0	0	0	0	0	0	k__Fungi	p__Ascomycota	c__Eurotiomycetes	o__Chaetothyriales	f__unidentified_Chaetothyriales	g__unidentified_Chaetothyriales	s__unidentified_Chaetothyriales	SH021604.07FU_HM239764_reps
OTU5950	0	0	0	0	0	0	0	0	4	67	30	10	0	0	0	0	0	0	0	0	0	0	0	0	0	0	0	0	0	0	0	0	0	0	0	0	k__Fungi	p__Ascomycota	c__Eurotiomycetes	o__Chaetothyriales	f__unidentified_Chaetothyriales	g__unidentified_Chaetothyriales	s__unidentified_Chaetothyriales	New.CleanUp.ReferenceOTU72876
OTU5925	0	0	0	0	0	0	0	3	0	0	19	14	0	0	0	0	0	0	0	0	0	71	0	0	0	0	0	0	0	0	0	0	0	0	0	0	k__Fungi	p__Ascomycota	c__Eurotiomycetes	o__Chaetothyriales	f__unidentified_Chaetothyriales	g__unidentified_Chaetothyriales	s__unidentified_Chaetothyriales	New.CleanUp.ReferenceOTU84941
OTU5852	0	0	0	0	0	0	0	0	0	0	0	0	0	0	0	0	0	0	0	0	0	0	0	0	49	1	8	1	15	2	6	3	0	0	0	0	k__Fungi	p__Ascomycota	c__Eurotiomycetes	o__Chaetothyriales	f__unidentified_Chaetothyriales	g__unidentified_Chaetothyriales	s__unidentified_Chaetothyriales	SH029739.07FU_JQ585537_refs
OTU5880	0	0	9	4	3	1	8	5	0	0	0	0	45	0	0	0	0	0	0	0	0	0	0	0	0	0	0	0	0	0	0	0	0	0	0	0	k__Fungi	p__Ascomycota	c__Eurotiomycetes	o__Chaetothyriales	f__unidentified_Chaetothyriales	g__unidentified_Chaetothyriales	s__unidentified_Chaetothyriales	New.CleanUp.ReferenceOTU112433
OTU5535	0	0	0	0	0	0	0	0	0	0	46	6	0	0	0	0	0	0	0	0	0	0	0	0	0	0	0	0	0	0	0	0	0	0	0	0	k__Fungi	p__Ascomycota	c__Eurotiomycetes	o__Chaetothyriales	f__unidentified_Chaetothyriales	g__unidentified_Chaetothyriales	s__unidentified_Chaetothyriales	New.CleanUp.ReferenceOTU107615
OTU5461	0	0	0	0	0	0	0	0	0	0	39	7	0	0	0	0	0	0	0	0	0	0	0	0	0	0	0	0	0	0	0	0	0	0	0	0	k__Fungi	p__Ascomycota	c__Eurotiomycetes	o__Chaetothyriales	f__unidentified_Chaetothyriales	g__unidentified_Chaetothyriales	s__unidentified_Chaetothyriales	New.CleanUp.ReferenceOTU28464
OTU5261	0	0	0	5	0	0	4	3	4	2	0	0	0	0	0	0	0	0	0	0	1	15	0	0	0	0	0	0	0	0	0	0	0	0	0	0	k__Fungi	p__Ascomycota	c__Eurotiomycetes	o__Chaetothyriales	f__unidentified_Chaetothyriales	g__unidentified_Chaetothyriales	s__unidentified_Chaetothyriales	New.CleanUp.ReferenceOTU83594
OTU5565	0	16	0	0	0	0	0	0	0	0	0	15	0	0	0	0	0	0	0	0	0	0	0	0	0	0	0	0	0	0	0	0	0	0	0	0	k__Fungi	p__Ascomycota	c__Eurotiomycetes	o__Chaetothyriales	f__unidentified_Chaetothyriales	g__unidentified_Chaetothyriales	s__unidentified_Chaetothyriales	New.CleanUp.ReferenceOTU99300
OTU5513	0	0	0	0	0	7	0	0	0	0	0	0	0	0	0	0	0	0	0	0	0	0	0	0	0	0	13	9	0	0	0	0	0	0	0	0	k__Fungi	p__Ascomycota	c__Eurotiomycetes	o__Chaetothyriales	f__unidentified_Chaetothyriales	g__unidentified_Chaetothyriales	s__unidentified_Chaetothyriales	SH013078.07FU_EU888622_refs
OTU4901	0	0	0	0	0	0	0	0	0	9	13	0	0	0	0	0	0	0	0	0	0	0	0	0	0	0	0	0	0	0	0	0	0	0	0	0	k__Fungi	p__Ascomycota	c__Eurotiomycetes	o__Chaetothyriales	f__unidentified_Chaetothyriales	g__unidentified_Chaetothyriales	s__unidentified_Chaetothyriales	New.CleanUp.ReferenceOTU63298
OTU4747	0	0	0	0	0	0	0	0	7	0	9	2	0	0	0	0	0	0	0	0	0	0	0	0	0	0	0	0	0	0	0	0	0	0	0	0	k__Fungi	p__Ascomycota	c__Eurotiomycetes	o__Chaetothyriales	f__unidentified_Chaetothyriales	g__unidentified_Chaetothyriales	s__unidentified_Chaetothyriales	SH001791.07FU_GQ159945_reps_singleton
OTU4755	0	0	0	0	0	1	17	0	0	0	0	0	0	0	0	0	0	0	0	0	0	0	0	0	0	0	0	0	0	0	0	0	0	0	0	0	k__Fungi	p__Ascomycota	c__Eurotiomycetes	o__Chaetothyriales	f__unidentified_Chaetothyriales	g__unidentified_Chaetothyriales	s__unidentified_Chaetothyriales	New.CleanUp.ReferenceOTU3395
OTU4697	0	0	0	0	0	0	0	0	0	0	0	0	0	0	0	0	0	0	0	0	17	0	0	0	0	0	0	0	0	0	0	0	0	0	0	0	k__Fungi	p__Ascomycota	c__Eurotiomycetes	o__Chaetothyriales	f__unidentified_Chaetothyriales	g__unidentified_Chaetothyriales	s__unidentified_Chaetothyriales	New.CleanUp.ReferenceOTU13555
OTU4534	0	0	0	0	0	0	3	0	0	0	0	0	0	0	0	0	0	0	0	0	0	11	0	0	0	0	0	0	0	0	0	0	0	0	0	0	k__Fungi	p__Ascomycota	c__Eurotiomycetes	o__Chaetothyriales	f__unidentified_Chaetothyriales	g__unidentified_Chaetothyriales	s__unidentified_Chaetothyriales	New.CleanUp.ReferenceOTU16082
OTU5002	0	0	1	0	0	6	0	0	0	0	0	0	0	0	0	0	0	4	0	0	0	0	0	0	0	0	0	1	1	0	0	1	0	0	0	0	k__Fungi	p__Ascomycota	c__Eurotiomycetes	o__Chaetothyriales	f__unidentified_Chaetothyriales	g__unidentified_Chaetothyriales	s__unidentified_Chaetothyriales	SH002246.07FU_GU054287_reps
OTU4103	0	0	0	0	0	0	0	0	0	0	9	0	0	0	0	0	0	0	0	0	0	0	0	0	0	0	0	0	0	0	0	0	0	0	0	0	k__Fungi	p__Ascomycota	c__Eurotiomycetes	o__Chaetothyriales	f__unidentified_Chaetothyriales	g__unidentified_Chaetothyriales	s__unidentified_Chaetothyriales	New.CleanUp.ReferenceOTU68848
OTU4288	0	0	0	0	0	1	6	0	0	0	0	0	0	0	0	0	0	2	0	0	0	0	0	0	0	0	0	0	0	0	0	0	0	0	0	0	k__Fungi	p__Ascomycota	c__Eurotiomycetes	o__Chaetothyriales	f__unidentified_Chaetothyriales	g__unidentified_Chaetothyriales	s__unidentified_Chaetothyriales	SH489374.07FU_KJ188561_reps
OTU4542	0	0	0	0	0	0	0	0	0	0	0	0	0	0	0	0	0	0	0	0	0	0	0	0	0	0	1	7	0	1	0	0	0	0	0	0	k__Fungi	p__Ascomycota	c__Eurotiomycetes	o__Chaetothyriales	f__unidentified_Chaetothyriales	g__unidentified_Chaetothyriales	s__unidentified_Chaetothyriales	New.CleanUp.ReferenceOTU115539
OTU3964	0	0	6	0	0	0	0	0	0	0	0	0	0	0	0	0	0	0	0	0	0	0	0	0	0	0	2	0	0	0	0	0	0	0	0	0	k__Fungi	p__Ascomycota	c__Eurotiomycetes	o__Chaetothyriales	f__unidentified_Chaetothyriales	g__unidentified_Chaetothyriales	s__unidentified_Chaetothyriales	New.CleanUp.ReferenceOTU53958
OTU4212	0	0	0	0	0	0	0	2	0	0	0	0	0	0	0	0	0	1	0	0	0	0	0	0	1	0	0	0	4	0	0	0	0	0	0	0	k__Fungi	p__Ascomycota	c__Eurotiomycetes	o__Chaetothyriales	f__unidentified_Chaetothyriales	g__unidentified_Chaetothyriales	s__unidentified_Chaetothyriales	New.CleanUp.ReferenceOTU109851
OTU4651	5	0	0	0	0	0	0	0	0	0	0	0	0	0	0	0	0	2	0	0	0	0	0	0	0	0	0	0	1	0	0	0	0	0	0	0	k__Fungi	p__Ascomycota	c__Eurotiomycetes	o__Chaetothyriales	f__unidentified_Chaetothyriales	g__unidentified_Chaetothyriales	s__unidentified_Chaetothyriales	New.CleanUp.ReferenceOTU98785
OTU3380	0	0	0	1	0	0	0	0	0	0	0	0	0	0	0	0	0	0	0	0	1	3	0	0	0	0	0	0	0	0	0	0	0	0	0	0	k__Fungi	p__Ascomycota	c__Eurotiomycetes	o__Chaetothyriales	f__unidentified_Chaetothyriales	g__unidentified_Chaetothyriales	s__unidentified_Chaetothyriales	New.CleanUp.ReferenceOTU28173
OTU4279	0	0	4	0	0	0	0	0	0	0	0	0	0	0	0	0	0	0	0	0	0	0	0	0	0	0	0	0	0	0	0	1	0	0	0	0	k__Fungi	p__Ascomycota	c__Eurotiomycetes	o__Chaetothyriales	f__unidentified_Chaetothyriales	g__unidentified_Chaetothyriales	s__unidentified_Chaetothyriales	SH020620.07FU_FR682264_reps_singleton
OTU3011	0	0	0	0	0	0	0	0	0	0	0	4	0	0	0	0	0	0	0	0	0	0	0	0	0	0	0	0	0	0	0	0	0	0	0	0	k__Fungi	p__Ascomycota	c__Eurotiomycetes	o__Chaetothyriales	f__unidentified_Chaetothyriales	g__unidentified_Chaetothyriales	s__unidentified_Chaetothyriales	New.CleanUp.ReferenceOTU1282
OTU1203	0	0	0	0	0	0	2	0	0	0	0	0	0	0	0	0	0	0	0	0	0	0	0	0	0	0	0	0	0	0	0	0	0	0	0	0	k__Fungi	p__Ascomycota	c__Eurotiomycetes	o__Chaetothyriales	f__unidentified_Chaetothyriales	g__unidentified_Chaetothyriales	s__unidentified_Chaetothyriales	SH483012.07FU_FJ197959_reps_singleton
OTU1272	0	0	0	0	0	0	0	0	0	2	0	0	0	0	0	0	0	0	0	0	0	0	0	0	0	0	0	0	0	0	0	0	0	0	0	0	k__Fungi	p__Ascomycota	c__Eurotiomycetes	o__Chaetothyriales	f__unidentified_Chaetothyriales	g__unidentified_Chaetothyriales	s__unidentified_Chaetothyriales	New.CleanUp.ReferenceOTU2667
OTU1563	0	0	0	0	0	0	0	2	0	0	0	0	0	0	0	0	0	0	0	0	0	0	0	0	0	0	0	0	0	0	0	0	0	0	0	0	k__Fungi	p__Ascomycota	c__Eurotiomycetes	o__Chaetothyriales	f__unidentified_Chaetothyriales	g__unidentified_Chaetothyriales	s__unidentified_Chaetothyriales	New.CleanUp.ReferenceOTU96705
OTU1584	0	0	0	0	0	0	0	0	0	0	0	0	0	0	0	0	0	0	0	0	0	0	0	0	0	1	0	1	0	0	0	0	0	0	0	0	k__Fungi	p__Ascomycota	c__Eurotiomycetes	o__Chaetothyriales	f__unidentified_Chaetothyriales	g__unidentified_Chaetothyriales	s__unidentified_Chaetothyriales	New.CleanUp.ReferenceOTU103497
OTU173	0	0	0	0	0	0	0	0	0	0	0	0	0	0	0	0	0	0	0	0	0	0	0	0	0	0	0	0	0	0	0	1	0	0	0	0	k__Fungi	p__Ascomycota	c__Eurotiomycetes	o__Chaetothyriales	f__unidentified_Chaetothyriales	g__unidentified_Chaetothyriales	s__unidentified_Chaetothyriales	New.CleanUp.ReferenceOTU9264
OTU313	0	0	0	0	0	0	0	0	0	0	0	0	0	0	0	0	0	0	0	0	0	0	0	0	1	0	0	0	0	0	0	0	0	0	0	0	k__Fungi	p__Ascomycota	c__Eurotiomycetes	o__Chaetothyriales	f__unidentified_Chaetothyriales	g__unidentified_Chaetothyriales	s__unidentified_Chaetothyriales	New.CleanUp.ReferenceOTU56249
OTU1241	0	0	0	0	0	0	0	1	0	0	0	0	0	0	0	0	0	0	0	0	0	0	0	0	0	0	0	0	0	0	0	0	0	0	0	0	k__Fungi	p__Ascomycota	c__Eurotiomycetes	o__Chaetothyriales	f__unidentified_Chaetothyriales	g__unidentified_Chaetothyriales	s__unidentified_Chaetothyriales	SH016651.07FU_FJ197905_reps_singleton
OTU3792	0	0	0	0	0	0	0	0	0	0	0	0	0	0	0	0	0	0	0	2	0	0	0	0	0	0	0	0	0	0	0	0	0	0	0	0	k__Fungi	p__Ascomycota	c__Eurotiomycetes	o__Coryneliales	f__Coryneliaceae	g__Caliciopsis	s__unidentified_Caliciopsis	New.CleanUp.ReferenceOTU38025
OTU5235	0	0	0	0	0	0	0	0	0	0	0	0	32	0	0	0	0	0	0	0	0	0	0	0	2	0	0	0	0	0	0	0	0	0	0	0	k__Fungi	p__Ascomycota	c__Eurotiomycetes	o__Eurotiales	f__unidentified_Eurotiales	g__unidentified_Eurotiales	s__unidentified_Eurotiales	SH014034.07FU_HQ392598_reps
OTU5305	0	0	0	0	0	0	0	0	0	0	0	0	31	0	0	0	1	1	0	0	0	0	0	0	0	0	0	0	0	0	0	0	0	0	0	0	k__Fungi	p__Ascomycota	c__Eurotiomycetes	o__Eurotiales	f__unidentified_Eurotiales	g__unidentified_Eurotiales	s__unidentified_Eurotiales	New.ReferenceOTU90
OTU5188	0	0	0	0	0	0	0	0	0	0	0	8	0	0	0	0	0	2	0	0	0	0	0	0	1	0	0	0	19	0	0	0	0	0	0	0	k__Fungi	p__Ascomycota	c__Eurotiomycetes	o__Eurotiales	f__unidentified_Eurotiales	g__unidentified_Eurotiales	s__unidentified_Eurotiales	SH014035.07FU_JN104521_reps
OTU4182	0	1	0	0	0	0	0	0	0	0	0	0	1	0	0	0	0	0	0	0	0	0	0	0	0	1	1	3	0	1	0	0	0	0	0	0	k__Fungi	p__Ascomycota	c__Eurotiomycetes	o__Eurotiales	f__unidentified_Eurotiales	g__unidentified_Eurotiales	s__unidentified_Eurotiales	New.ReferenceOTU837
OTU5429	0	0	0	0	0	0	0	0	0	0	0	0	0	0	0	0	0	0	0	0	0	0	0	0	0	0	0	0	0	0	0	0	1	0	3	0	k__Fungi	p__Ascomycota	c__Eurotiomycetes	o__Eurotiales	f__unidentified_Eurotiales	g__unidentified_Eurotiales	s__unidentified_Eurotiales	New.CleanUp.ReferenceOTU40997
OTU2467	0	0	0	0	0	0	0	0	0	0	0	0	0	0	0	0	0	0	0	0	0	0	0	0	0	0	0	1	0	0	1	0	0	0	0	0	k__Fungi	p__Ascomycota	c__Eurotiomycetes	o__Eurotiales	f__unidentified_Eurotiales	g__unidentified_Eurotiales	s__unidentified_Eurotiales	New.ReferenceOTU185
OTU230	0	0	0	0	0	0	0	0	0	0	0	0	0	0	0	0	0	1	0	0	0	0	0	0	0	0	0	0	0	0	0	0	0	0	0	0	k__Fungi	p__Ascomycota	c__Eurotiomycetes	o__Eurotiales	f__unidentified_Eurotiales	g__unidentified_Eurotiales	s__unidentified_Eurotiales	New.CleanUp.ReferenceOTU25575
OTU284	0	0	0	0	0	0	0	0	0	0	0	0	0	0	0	0	0	0	0	0	0	0	0	0	0	0	0	0	0	1	0	0	0	0	0	0	k__Fungi	p__Ascomycota	c__Eurotiomycetes	o__Eurotiales	f__unidentified_Eurotiales	g__unidentified_Eurotiales	s__unidentified_Eurotiales	New.CleanUp.ReferenceOTU45553
OTU538	0	0	0	0	0	0	0	0	0	0	0	0	0	0	0	0	0	0	0	0	0	0	0	0	0	0	1	0	0	0	0	0	0	0	0	0	k__Fungi	p__Ascomycota	c__Eurotiomycetes	o__Eurotiales	f__unidentified_Eurotiales	g__unidentified_Eurotiales	s__unidentified_Eurotiales	New.CleanUp.ReferenceOTU120468
OTU1622	0	0	0	0	0	0	0	0	0	0	0	0	0	0	0	0	0	0	0	0	0	0	0	0	0	0	0	0	0	1	0	0	0	0	0	0	k__Fungi	p__Ascomycota	c__Eurotiomycetes	o__Eurotiales	f__unidentified_Eurotiales	g__unidentified_Eurotiales	s__unidentified_Eurotiales	New.CleanUp.ReferenceOTU115032
OTU2416	0	0	0	0	0	1	0	0	0	0	0	0	0	0	0	0	0	0	0	0	0	0	0	0	0	0	0	0	0	0	0	0	0	0	0	0	k__Fungi	p__Ascomycota	c__Eurotiomycetes	o__Eurotiales	f__unidentified_Eurotiales	g__unidentified_Eurotiales	s__unidentified_Eurotiales	SH022274.07FU_KJ406889_reps
OTU6240	0	0	0	0	0	0	0	0	0	0	0	0	0	0	193	28	0	0	0	0	0	0	0	0	0	0	0	0	0	0	0	0	0	0	0	0	k__Fungi	p__Ascomycota	c__Eurotiomycetes	o__Eurotiales	f__Elaphomycetaceae	g__Elaphomyces	s__unidentified_Elaphomyces	New.CleanUp.ReferenceOTU1379
OTU4304	0	0	0	0	0	0	0	0	7	0	0	0	0	0	0	0	0	0	0	0	0	0	0	0	0	0	0	0	0	0	0	0	0	0	0	0	k__Fungi	p__Ascomycota	c__Eurotiomycetes	o__Eurotiales	f__Elaphomycetaceae	g__Elaphomyces	s__unidentified_Elaphomyces	New.CleanUp.ReferenceOTU53162
OTU2452	0	0	0	0	0	0	0	0	3	0	0	0	0	0	0	0	0	0	0	0	0	0	0	0	0	0	0	0	0	0	0	0	0	0	0	0	k__Fungi	p__Ascomycota	c__Eurotiomycetes	o__Eurotiales	f__Elaphomycetaceae	g__Elaphomyces	s__Elaphomyces_muricatus	SH495030.07FU_KR029740_reps
OTU3932	0	0	0	0	0	0	0	0	0	0	0	8	0	0	0	0	0	0	0	0	0	0	0	0	0	0	0	0	0	0	0	0	0	0	0	0	k__Fungi	p__Ascomycota	c__Eurotiomycetes	o__Eurotiales	f__Eurotiales_fam_Incertae_sedis	g__Thermomyces	s__Thermomyces_lanuginosus	SH007619.07FU_AY706335_refs
OTU2994	0	0	0	0	0	0	0	0	0	1	0	0	0	3	0	0	0	0	0	0	0	0	0	0	0	0	0	0	0	0	0	0	0	0	0	0	k__Fungi	p__Ascomycota	c__Eurotiomycetes	o__Eurotiales	f__Thermoascaceae	g__Thermoascus	s__Thermoascus_aurantiacus	SH005511.07FU_KC342033_reps
OTU6957	0	35	3	30	35	69	196	103	131	259	61	11	282	44	1	51	110	287	288	52	66	139	312	0	75	84	154	571	10	72	85	265	380	443	417	278	k__Fungi	p__Ascomycota	c__Eurotiomycetes	o__Eurotiales	f__Trichocomaceae	g__unidentified_Trichocomaceae	s__unidentified_Trichocomaceae	New.ReferenceOTU37
OTU6934	20	81	3	17	143	25	31	7	0	0	0	0	13	0	0	1	2	122	4	9	0	0	0	0	239	336	359	1381	302	308	406	357	2	0	2	9	k__Fungi	p__Ascomycota	c__Eurotiomycetes	o__Eurotiales	f__Trichocomaceae	g__unidentified_Trichocomaceae	s__unidentified_Trichocomaceae	New.ReferenceOTU250
OTU6822	0	0	0	0	0	0	0	0	0	0	0	0	1473	1	8	0	126	81	6	10	0	5	0	0	0	0	0	0	0	0	0	0	0	0	0	0	k__Fungi	p__Ascomycota	c__Eurotiomycetes	o__Eurotiales	f__Trichocomaceae	g__unidentified_Trichocomaceae	s__unidentified_Trichocomaceae	SH005529.07FU_KC222792_reps_singleton
OTU6742	0	0	7	0	0	3	6	1	3	0	2	0	29	0	0	0	6	18	5	0	0	0	0	0	1	10	3	0	26	35	8	2	41	0	47	15	k__Fungi	p__Ascomycota	c__Eurotiomycetes	o__Eurotiales	f__Trichocomaceae	g__unidentified_Trichocomaceae	s__unidentified_Trichocomaceae	New.ReferenceOTU398
OTU6355	37	201	7	0	0	0	0	0	0	0	0	0	0	12	0	0	0	0	3	0	7	0	0	0	0	0	0	0	0	0	0	0	0	0	0	0	k__Fungi	p__Ascomycota	c__Eurotiomycetes	o__Eurotiales	f__Trichocomaceae	g__unidentified_Trichocomaceae	s__unidentified_Trichocomaceae	New.ReferenceOTU728
OTU6111	15	0	5	0	0	0	1	2	0	0	0	0	5	10	0	24	2	10	39	6	1	0	0	0	15	0	0	0	0	0	0	0	0	0	0	0	k__Fungi	p__Ascomycota	c__Eurotiomycetes	o__Eurotiales	f__Trichocomaceae	g__unidentified_Trichocomaceae	s__unidentified_Trichocomaceae	New.ReferenceOTU282
OTU5849	1	0	0	5	0	0	0	4	3	0	1	0	11	5	0	0	0	0	1	0	0	13	10	21	0	0	0	0	0	0	0	0	1	0	0	0	k__Fungi	p__Ascomycota	c__Eurotiomycetes	o__Eurotiales	f__Trichocomaceae	g__unidentified_Trichocomaceae	s__unidentified_Trichocomaceae	SH005518.07FU_GU092967_reps
OTU5519	0	2	1	4	0	14	1	0	0	0	3	26	0	0	0	0	0	0	0	0	0	0	0	0	0	0	0	0	0	0	0	0	0	0	0	0	k__Fungi	p__Ascomycota	c__Eurotiomycetes	o__Eurotiales	f__Trichocomaceae	g__unidentified_Trichocomaceae	s__unidentified_Trichocomaceae	New.CleanUp.ReferenceOTU48185
OTU5460	0	0	1	2	0	0	0	0	0	0	0	0	0	14	0	7	0	0	0	0	0	0	0	0	8	9	0	0	0	0	0	3	0	0	0	0	k__Fungi	p__Ascomycota	c__Eurotiomycetes	o__Eurotiales	f__Trichocomaceae	g__unidentified_Trichocomaceae	s__unidentified_Trichocomaceae	New.ReferenceOTU4
OTU5840	0	0	0	0	2	4	16	2	0	0	0	2	0	0	0	0	0	7	0	0	0	0	0	0	0	0	1	2	0	0	0	1	5	0	1	0	k__Fungi	p__Ascomycota	c__Eurotiomycetes	o__Eurotiales	f__Trichocomaceae	g__unidentified_Trichocomaceae	s__unidentified_Trichocomaceae	SH023253.07FU_JX043088_reps_singleton
OTU5861	0	0	0	0	0	3	0	0	0	0	0	0	30	0	1	0	0	0	3	0	0	0	0	0	0	0	0	0	0	0	0	0	4	0	0	0	k__Fungi	p__Ascomycota	c__Eurotiomycetes	o__Eurotiales	f__Trichocomaceae	g__unidentified_Trichocomaceae	s__unidentified_Trichocomaceae	New.CleanUp.ReferenceOTU45531
OTU4185	0	0	0	2	2	0	4	0	0	0	0	0	0	0	0	0	0	0	0	0	0	0	0	0	0	0	0	2	0	0	0	0	0	0	0	0	k__Fungi	p__Ascomycota	c__Eurotiomycetes	o__Eurotiales	f__Trichocomaceae	g__unidentified_Trichocomaceae	s__unidentified_Trichocomaceae	New.CleanUp.ReferenceOTU1925
OTU4389	0	0	0	0	0	0	0	0	0	0	0	0	0	0	0	0	0	0	0	0	0	0	0	0	0	1	0	3	2	1	0	3	0	0	0	0	k__Fungi	p__Ascomycota	c__Eurotiomycetes	o__Eurotiales	f__Trichocomaceae	g__unidentified_Trichocomaceae	s__unidentified_Trichocomaceae	New.CleanUp.ReferenceOTU75753
OTU4577	0	0	0	0	0	0	0	1	0	0	0	0	0	0	0	0	0	0	0	0	0	5	0	0	0	0	0	0	0	0	0	0	0	0	2	0	k__Fungi	p__Ascomycota	c__Eurotiomycetes	o__Eurotiales	f__Trichocomaceae	g__unidentified_Trichocomaceae	s__unidentified_Trichocomaceae	SH014097.07FU_GU566286_reps
OTU3610	0	0	0	0	0	0	0	0	0	0	0	0	0	0	0	0	0	0	0	0	0	0	0	0	1	1	0	0	1	1	1	1	0	0	0	0	k__Fungi	p__Ascomycota	c__Eurotiomycetes	o__Eurotiales	f__Trichocomaceae	g__unidentified_Trichocomaceae	s__unidentified_Trichocomaceae	New.CleanUp.ReferenceOTU18874
OTU3638	0	0	0	0	0	0	0	0	0	0	0	0	0	0	0	0	0	0	0	0	0	0	0	0	1	0	0	0	4	0	1	0	0	0	0	0	k__Fungi	p__Ascomycota	c__Eurotiomycetes	o__Eurotiales	f__Trichocomaceae	g__unidentified_Trichocomaceae	s__unidentified_Trichocomaceae	New.CleanUp.ReferenceOTU91732
OTU3793	0	0	0	0	0	0	0	2	0	0	0	0	0	0	0	0	0	0	0	0	0	0	0	0	0	3	0	0	0	0	1	0	0	0	0	0	k__Fungi	p__Ascomycota	c__Eurotiomycetes	o__Eurotiales	f__Trichocomaceae	g__unidentified_Trichocomaceae	s__unidentified_Trichocomaceae	New.CleanUp.ReferenceOTU38535
OTU3379	0	0	0	0	0	1	0	0	2	2	0	0	0	0	0	0	0	0	0	0	0	0	0	0	0	0	0	0	0	0	0	0	0	0	0	0	k__Fungi	p__Ascomycota	c__Eurotiomycetes	o__Eurotiales	f__Trichocomaceae	g__unidentified_Trichocomaceae	s__unidentified_Trichocomaceae	New.CleanUp.ReferenceOTU27741
OTU2468	0	0	0	0	0	0	0	0	3	0	0	0	0	0	0	0	0	0	0	0	0	0	0	0	0	0	0	0	0	0	0	0	0	0	0	0	k__Fungi	p__Ascomycota	c__Eurotiomycetes	o__Eurotiales	f__Trichocomaceae	g__unidentified_Trichocomaceae	s__unidentified_Trichocomaceae	New.ReferenceOTU751
OTU1283	0	0	0	0	0	0	0	0	0	0	0	0	0	0	0	0	0	0	0	0	0	0	0	0	1	0	0	1	0	0	0	0	0	0	0	0	k__Fungi	p__Ascomycota	c__Eurotiomycetes	o__Eurotiales	f__Trichocomaceae	g__unidentified_Trichocomaceae	s__unidentified_Trichocomaceae	New.CleanUp.ReferenceOTU5007
OTU1307	0	0	1	0	1	0	0	0	0	0	0	0	0	0	0	0	0	0	0	0	0	0	0	0	0	0	0	0	0	0	0	0	0	0	0	0	k__Fungi	p__Ascomycota	c__Eurotiomycetes	o__Eurotiales	f__Trichocomaceae	g__unidentified_Trichocomaceae	s__unidentified_Trichocomaceae	New.CleanUp.ReferenceOTU15121
OTU1336	0	0	0	0	0	0	0	0	0	0	0	0	0	0	0	0	0	0	0	0	0	0	0	0	0	0	0	2	0	0	0	0	0	0	0	0	k__Fungi	p__Ascomycota	c__Eurotiomycetes	o__Eurotiales	f__Trichocomaceae	g__unidentified_Trichocomaceae	s__unidentified_Trichocomaceae	New.CleanUp.ReferenceOTU25309
OTU2476	0	0	0	0	0	0	0	0	0	0	0	0	0	0	0	0	0	1	0	0	0	0	0	0	0	0	0	0	0	1	0	0	0	0	0	0	k__Fungi	p__Ascomycota	c__Eurotiomycetes	o__Eurotiales	f__Trichocomaceae	g__unidentified_Trichocomaceae	s__unidentified_Trichocomaceae	New.CleanUp.ReferenceOTU3903
OTU3118	0	0	0	0	0	1	0	0	0	0	0	0	0	0	0	0	0	0	0	0	0	0	0	0	0	0	0	0	0	0	1	0	0	0	0	0	k__Fungi	p__Ascomycota	c__Eurotiomycetes	o__Eurotiales	f__Trichocomaceae	g__unidentified_Trichocomaceae	s__unidentified_Trichocomaceae	New.CleanUp.ReferenceOTU105008
OTU77	0	0	0	0	0	0	0	0	0	0	0	0	0	0	0	0	1	0	0	0	0	0	0	0	0	0	0	0	0	0	0	0	0	0	0	0	k__Fungi	p__Ascomycota	c__Eurotiomycetes	o__Eurotiales	f__Trichocomaceae	g__unidentified_Trichocomaceae	s__unidentified_Trichocomaceae	SH020503.07FU_KC962102_reps
OTU205	0	0	0	0	0	0	0	0	0	0	0	0	0	0	0	0	0	0	0	0	0	0	0	0	0	0	0	1	0	0	0	0	0	0	0	0	k__Fungi	p__Ascomycota	c__Eurotiomycetes	o__Eurotiales	f__Trichocomaceae	g__unidentified_Trichocomaceae	s__unidentified_Trichocomaceae	New.CleanUp.ReferenceOTU19903
OTU271	0	0	0	0	0	0	0	0	0	0	0	0	0	0	0	0	0	0	0	0	0	0	0	0	0	0	0	0	0	0	1	0	0	0	0	0	k__Fungi	p__Ascomycota	c__Eurotiomycetes	o__Eurotiales	f__Trichocomaceae	g__unidentified_Trichocomaceae	s__unidentified_Trichocomaceae	New.CleanUp.ReferenceOTU40763
OTU332	0	0	0	0	1	0	0	0	0	0	0	0	0	0	0	0	0	0	0	0	0	0	0	0	0	0	0	0	0	0	0	0	0	0	0	0	k__Fungi	p__Ascomycota	c__Eurotiomycetes	o__Eurotiales	f__Trichocomaceae	g__unidentified_Trichocomaceae	s__unidentified_Trichocomaceae	New.CleanUp.ReferenceOTU60947
OTU342	0	0	0	0	0	0	1	0	0	0	0	0	0	0	0	0	0	0	0	0	0	0	0	0	0	0	0	0	0	0	0	0	0	0	0	0	k__Fungi	p__Ascomycota	c__Eurotiomycetes	o__Eurotiales	f__Trichocomaceae	g__unidentified_Trichocomaceae	s__unidentified_Trichocomaceae	New.CleanUp.ReferenceOTU63395
OTU444	0	0	0	0	0	0	0	0	0	0	0	0	0	0	0	0	0	0	0	0	0	0	0	0	0	0	0	1	0	0	0	0	0	0	0	0	k__Fungi	p__Ascomycota	c__Eurotiomycetes	o__Eurotiales	f__Trichocomaceae	g__unidentified_Trichocomaceae	s__unidentified_Trichocomaceae	New.CleanUp.ReferenceOTU95175
OTU1347	0	0	0	0	0	0	0	0	0	0	0	0	0	0	0	0	0	0	0	0	0	0	0	0	0	0	0	0	0	0	1	0	0	0	0	0	k__Fungi	p__Ascomycota	c__Eurotiomycetes	o__Eurotiales	f__Trichocomaceae	g__unidentified_Trichocomaceae	s__unidentified_Trichocomaceae	New.CleanUp.ReferenceOTU27754
OTU6987	1	24	16	3	33	188	258	19	0	0	2	0	146	59	1	0	8	1187	30	96	3	0	4	0	1076	1338	761	993	700	1505	489	1823	4	0	239	42	k__Fungi	p__Ascomycota	c__Eurotiomycetes	o__Eurotiales	f__Trichocomaceae	g__Aspergillus	s__unidentified_Aspergillus	New.ReferenceOTU137
OTU6309	0	0	0	0	0	0	0	0	0	0	0	0	0	0	0	0	0	1	0	0	0	0	0	0	96	42	5	101	0	0	4	3	0	0	0	0	k__Fungi	p__Ascomycota	c__Eurotiomycetes	o__Eurotiales	f__Trichocomaceae	g__Aspergillus	s__unidentified_Aspergillus	New.ReferenceOTU304
OTU5865	0	0	0	0	0	0	0	0	0	0	0	0	0	10	0	85	0	0	0	0	0	0	0	0	0	0	0	0	0	0	0	0	0	0	0	0	k__Fungi	p__Ascomycota	c__Eurotiomycetes	o__Eurotiales	f__Trichocomaceae	g__Aspergillus	s__unidentified_Aspergillus	SH007910.07FU_FJ531161_refs
OTU5779	6	0	1	0	0	0	0	3	0	0	0	0	34	2	10	0	3	4	6	0	0	0	0	0	0	0	0	1	0	0	2	0	1	0	0	0	k__Fungi	p__Ascomycota	c__Eurotiomycetes	o__Eurotiales	f__Trichocomaceae	g__Aspergillus	s__unidentified_Aspergillus	SH003415.07FU_EF652074_refs
OTU5341	0	0	0	0	0	0	0	0	1	2	0	1	0	0	0	2	0	4	0	7	0	0	1	0	2	0	0	0	1	0	4	0	3	0	0	0	k__Fungi	p__Ascomycota	c__Eurotiomycetes	o__Eurotiales	f__Trichocomaceae	g__Aspergillus	s__unidentified_Aspergillus	SH019644.07FU_FJ629352_refs
OTU4597	0	0	0	0	0	0	0	0	0	0	0	0	0	0	0	0	0	3	0	0	0	0	0	0	1	2	0	4	0	2	0	2	0	0	0	0	k__Fungi	p__Ascomycota	c__Eurotiomycetes	o__Eurotiales	f__Trichocomaceae	g__Aspergillus	s__unidentified_Aspergillus	New.CleanUp.ReferenceOTU96821
OTU4169	0	0	0	0	0	0	0	0	2	0	0	2	0	0	0	0	0	0	0	0	0	0	0	0	0	0	0	0	3	2	0	0	0	0	0	0	k__Fungi	p__Ascomycota	c__Eurotiomycetes	o__Eurotiales	f__Trichocomaceae	g__Aspergillus	s__unidentified_Aspergillus	SH007901.07FU_JQ301894_refs
OTU4739	0	0	0	0	0	0	0	0	0	0	0	0	0	0	0	0	0	0	0	0	1	0	0	0	0	0	0	0	5	0	1	2	0	0	0	0	k__Fungi	p__Ascomycota	c__Eurotiomycetes	o__Eurotiales	f__Trichocomaceae	g__Aspergillus	s__unidentified_Aspergillus	SH004957.07FU_EF661275_reps
OTU3930	0	0	0	0	0	0	0	0	0	0	0	8	0	0	0	0	0	0	0	0	0	0	0	0	0	0	0	0	0	0	0	0	0	0	0	0	k__Fungi	p__Ascomycota	c__Eurotiomycetes	o__Eurotiales	f__Trichocomaceae	g__Aspergillus	s__unidentified_Aspergillus	SH007940.07FU_KJ679498_reps_singleton
OTU4268	0	0	0	0	0	0	0	0	0	0	0	0	0	0	0	0	0	0	0	0	0	0	0	0	0	0	0	0	0	0	0	0	8	0	0	0	k__Fungi	p__Ascomycota	c__Eurotiomycetes	o__Eurotiales	f__Trichocomaceae	g__Aspergillus	s__unidentified_Aspergillus	SH004958.07FU_HF937386_refs
OTU4541	0	0	0	0	0	0	0	0	0	0	0	0	0	0	0	0	0	0	0	0	0	0	0	0	2	2	0	0	3	1	0	0	0	0	0	0	k__Fungi	p__Ascomycota	c__Eurotiomycetes	o__Eurotiales	f__Trichocomaceae	g__Aspergillus	s__unidentified_Aspergillus	New.CleanUp.ReferenceOTU114289
OTU4642	0	0	0	0	0	0	0	1	0	0	0	0	1	0	0	0	0	2	0	0	0	0	0	0	0	0	1	1	1	0	0	0	0	0	1	0	k__Fungi	p__Ascomycota	c__Eurotiomycetes	o__Eurotiales	f__Trichocomaceae	g__Aspergillus	s__unidentified_Aspergillus	New.CleanUp.ReferenceOTU38280
OTU3783	0	0	0	0	0	0	0	0	0	0	0	0	0	0	0	0	0	1	0	0	0	0	0	0	0	1	1	1	0	0	0	1	0	0	0	1	k__Fungi	p__Ascomycota	c__Eurotiomycetes	o__Eurotiales	f__Trichocomaceae	g__Aspergillus	s__unidentified_Aspergillus	New.CleanUp.ReferenceOTU12672
OTU4317	0	0	0	0	0	0	0	0	0	0	0	0	0	0	0	0	0	0	0	0	0	0	0	0	1	0	1	0	0	1	0	2	0	0	0	0	k__Fungi	p__Ascomycota	c__Eurotiomycetes	o__Eurotiales	f__Trichocomaceae	g__Aspergillus	s__unidentified_Aspergillus	New.CleanUp.ReferenceOTU122167
OTU3069	0	0	1	0	0	1	2	0	0	0	0	0	0	0	0	0	0	0	0	0	0	0	0	0	0	0	0	0	0	0	0	0	0	0	0	0	k__Fungi	p__Ascomycota	c__Eurotiomycetes	o__Eurotiales	f__Trichocomaceae	g__Aspergillus	s__unidentified_Aspergillus	New.CleanUp.ReferenceOTU58543
OTU2548	0	0	0	0	0	0	0	0	0	0	0	0	0	0	0	0	0	0	0	0	0	0	0	0	0	0	0	3	0	0	0	0	0	0	0	0	k__Fungi	p__Ascomycota	c__Eurotiomycetes	o__Eurotiales	f__Trichocomaceae	g__Aspergillus	s__unidentified_Aspergillus	New.CleanUp.ReferenceOTU49755
OTU1492	0	0	0	0	0	0	0	0	0	0	0	0	0	0	2	0	0	0	0	0	0	0	0	0	0	0	0	0	0	0	0	0	0	0	0	0	k__Fungi	p__Ascomycota	c__Eurotiomycetes	o__Eurotiales	f__Trichocomaceae	g__Aspergillus	s__unidentified_Aspergillus	New.CleanUp.ReferenceOTU75771
OTU1556	0	1	0	0	0	0	0	0	0	0	0	0	0	0	0	0	0	1	0	0	0	0	0	0	0	0	0	0	0	0	0	0	0	0	0	0	k__Fungi	p__Ascomycota	c__Eurotiomycetes	o__Eurotiales	f__Trichocomaceae	g__Aspergillus	s__unidentified_Aspergillus	New.CleanUp.ReferenceOTU94000
OTU2575	0	0	2	0	0	0	0	0	0	0	0	0	0	0	0	0	0	0	0	0	0	0	0	0	0	0	0	0	0	0	0	0	0	0	0	0	k__Fungi	p__Ascomycota	c__Eurotiomycetes	o__Eurotiales	f__Trichocomaceae	g__Aspergillus	s__unidentified_Aspergillus	New.CleanUp.ReferenceOTU69739
OTU66	0	0	0	0	0	0	0	0	0	0	0	0	0	0	1	0	0	0	0	0	0	0	0	0	0	0	0	0	0	0	0	0	0	0	0	0	k__Fungi	p__Ascomycota	c__Eurotiomycetes	o__Eurotiales	f__Trichocomaceae	g__Aspergillus	s__unidentified_Aspergillus	SH487121.07FU_LN482438_reps_singleton
OTU424	0	0	0	0	0	0	0	0	0	0	0	0	0	0	0	0	0	0	0	0	0	0	0	0	0	0	0	1	0	0	0	0	0	0	0	0	k__Fungi	p__Ascomycota	c__Eurotiomycetes	o__Eurotiales	f__Trichocomaceae	g__Aspergillus	s__unidentified_Aspergillus	New.CleanUp.ReferenceOTU87637
OTU432	0	0	0	0	0	0	0	0	0	0	0	0	0	0	0	0	0	0	0	0	0	0	0	0	0	1	0	0	0	0	0	0	0	0	0	0	k__Fungi	p__Ascomycota	c__Eurotiomycetes	o__Eurotiales	f__Trichocomaceae	g__Aspergillus	s__unidentified_Aspergillus	New.CleanUp.ReferenceOTU90400
OTU543	0	0	0	0	0	0	0	0	0	0	0	0	0	0	0	0	0	0	0	0	0	0	0	0	0	0	0	0	0	0	0	0	0	0	1	0	k__Fungi	p__Ascomycota	c__Eurotiomycetes	o__Eurotiales	f__Trichocomaceae	g__Aspergillus	s__unidentified_Aspergillus	New.CleanUp.ReferenceOTU121920
OTU1437	0	0	0	0	1	0	0	0	0	0	0	0	0	0	0	0	0	0	0	0	0	0	0	0	0	0	0	0	0	0	0	0	0	0	0	0	k__Fungi	p__Ascomycota	c__Eurotiomycetes	o__Eurotiales	f__Trichocomaceae	g__Aspergillus	s__unidentified_Aspergillus	New.CleanUp.ReferenceOTU61408
OTU1491	0	0	0	0	0	0	0	0	0	0	0	0	1	0	0	0	0	0	0	0	0	0	0	0	0	0	0	0	0	0	0	0	0	0	0	0	k__Fungi	p__Ascomycota	c__Eurotiomycetes	o__Eurotiales	f__Trichocomaceae	g__Aspergillus	s__unidentified_Aspergillus	New.CleanUp.ReferenceOTU75070
OTU3761	0	0	0	0	0	0	0	0	0	0	0	0	0	0	7	0	0	0	0	0	0	0	0	0	0	0	0	0	0	0	0	0	0	0	0	0	k__Fungi	p__Ascomycota	c__Eurotiomycetes	o__Eurotiales	f__Trichocomaceae	g__Aspergillus	s__Aspergillus_citrisporus	SH005510.07FU_EF669702_refs
OTU4702	0	0	0	0	0	0	0	0	0	0	8	0	0	0	0	0	1	0	0	8	0	0	0	0	0	0	0	0	0	0	0	0	0	0	0	0	k__Fungi	p__Ascomycota	c__Eurotiomycetes	o__Eurotiales	f__Trichocomaceae	g__Aspergillus	s__Aspergillus_clavatoflavus	New.CleanUp.ReferenceOTU32680
OTU5645	0	0	0	0	0	0	0	0	0	0	0	41	0	0	0	8	0	0	0	0	0	0	0	0	0	0	0	0	0	0	0	0	0	0	0	0	k__Fungi	p__Ascomycota	c__Eurotiomycetes	o__Eurotiales	f__Trichocomaceae	g__Aspergillus	s__Aspergillus_fumigatus	SH032325.07FU_HQ026746_refs
OTU4376	0	0	0	0	7	5	0	0	0	0	0	0	0	0	0	0	0	0	0	0	0	0	0	0	0	0	0	0	0	0	0	0	0	0	0	0	k__Fungi	p__Ascomycota	c__Eurotiomycetes	o__Eurotiales	f__Trichocomaceae	g__Aspergillus	s__Aspergillus_fumigatus	New.ReferenceOTU327
OTU3072	0	0	0	0	4	0	0	0	0	0	0	0	0	0	0	0	0	0	0	0	0	0	0	0	0	0	0	0	0	0	0	0	0	0	0	0	k__Fungi	p__Ascomycota	c__Eurotiomycetes	o__Eurotiales	f__Trichocomaceae	g__Aspergillus	s__Aspergillus_fumigatus	New.CleanUp.ReferenceOTU61042
OTU2995	0	0	0	0	0	0	0	3	1	0	0	0	0	0	0	0	0	0	0	0	0	0	0	0	0	0	0	0	0	0	0	0	0	0	0	0	k__Fungi	p__Ascomycota	c__Eurotiomycetes	o__Eurotiales	f__Trichocomaceae	g__Paecilomyces	s__unidentified_Paecilomyces	SH017581.07FU_KF028769_reps_singleton
OTU7006	0	14	0	0	19	129	261	97	47	22	31	89	473	13	0	0	135	1384	23	0	0	7	46	0	717	1599	1200	3395	756	1052	1886	1878	456	399	1525	555	k__Fungi	p__Ascomycota	c__Eurotiomycetes	o__Eurotiales	f__Trichocomaceae	g__Penicillium	s__unidentified_Penicillium	SH005487.07FU_AF033401_refs
OTU6997	151	833	11	1232	902	606	391	59	168	27	52	77	987	0	0	0	346	1241	98	83	2	4	5	0	169	554	681	34	1066	523	884	764	18	125	70	557	k__Fungi	p__Ascomycota	c__Eurotiomycetes	o__Eurotiales	f__Trichocomaceae	g__Penicillium	s__unidentified_Penicillium	SH027144.07FU_GU981582_refs
OTU6950	44	18	30	176	29	109	92	181	104	34	25	27	919	98	6	55	122	242	323	82	10	0	47	4	0	5	1	0	2	4	0	1	526	110	230	584	k__Fungi	p__Ascomycota	c__Eurotiomycetes	o__Eurotiales	f__Trichocomaceae	g__Penicillium	s__unidentified_Penicillium	New.ReferenceOTU277
OTU6913	0	0	0	0	0	1	0	0	28	22	0	0	0	1	0	0	0	311	0	0	0	0	0	0	9	272	264	724	274	100	475	50	67	114	56	28	k__Fungi	p__Ascomycota	c__Eurotiomycetes	o__Eurotiales	f__Trichocomaceae	g__Penicillium	s__unidentified_Penicillium	New.ReferenceOTU145
OTU6910	169	9	88	34	0	7	37	1	1	2	0	0	461	356	163	278	148	212	427	183	3	0	4	0	13	25	0	6	51	9	0	3	0	0	0	0	k__Fungi	p__Ascomycota	c__Eurotiomycetes	o__Eurotiales	f__Trichocomaceae	g__Penicillium	s__unidentified_Penicillium	SH005496.07FU_AF033406_refs
OTU6858	0	0	6	0	0	8	0	0	81	42	24	0	0	3	0	0	0	32	0	0	0	0	0	0	4	6	18	0	3	58	1	153	1	1	805	758	k__Fungi	p__Ascomycota	c__Eurotiomycetes	o__Eurotiales	f__Trichocomaceae	g__Penicillium	s__unidentified_Penicillium	SH017811.07FU_HQ655818_reps_singleton
OTU6846	0	9	0	1	4	64	82	0	0	0	0	0	37	2	3	0	0	243	0	2	0	0	0	0	641	85	12	134	355	117	15	105	12	0	0	1	k__Fungi	p__Ascomycota	c__Eurotiomycetes	o__Eurotiales	f__Trichocomaceae	g__Penicillium	s__unidentified_Penicillium	New.ReferenceOTU918
OTU6809	0	1	9	1	1	2	15	4	21	19	16	9	180	0	0	0	31	18	22	16	89	38	142	34	0	2	9	5	0	5	3	10	382	96	22	64	k__Fungi	p__Ascomycota	c__Eurotiomycetes	o__Eurotiales	f__Trichocomaceae	g__Penicillium	s__unidentified_Penicillium	SH492574.07FU_KP401864_reps_singleton
OTU6750	8	3	19	2	4	16	12	24	10	1	0	0	99	50	34	9	24	43	22	30	13	13	10	2	70	29	13	75	98	34	18	59	45	4	15	1	k__Fungi	p__Ascomycota	c__Eurotiomycetes	o__Eurotiales	f__Trichocomaceae	g__Penicillium	s__unidentified_Penicillium	SH013505.07FU_JN617674_refs
OTU6677	274	48	18	111	166	5	37	43	0	0	0	3	0	31	0	0	0	0	0	1	5	2	9	0	0	0	0	0	0	0	3	0	3	0	0	0	k__Fungi	p__Ascomycota	c__Eurotiomycetes	o__Eurotiales	f__Trichocomaceae	g__Penicillium	s__unidentified_Penicillium	SH496539.07FU_KM278058_reps_singleton
OTU6667	5	1	4	1	5	5	7	0	64	43	13	3	39	0	0	0	152	91	5	1	0	0	0	0	0	20	1	10	13	0	8	26	29	43	29	34	k__Fungi	p__Ascomycota	c__Eurotiomycetes	o__Eurotiales	f__Trichocomaceae	g__Penicillium	s__unidentified_Penicillium	SH022272.07FU_KC411733_refs
OTU6724	0	0	0	22	33	0	8	69	0	0	0	0	423	0	0	0	7	46	5	0	0	0	0	0	0	0	0	0	1	4	0	3	0	0	0	0	k__Fungi	p__Ascomycota	c__Eurotiomycetes	o__Eurotiales	f__Trichocomaceae	g__Penicillium	s__unidentified_Penicillium	New.ReferenceOTU400
OTU6632	49	167	2	72	8	69	14	14	1	15	2	7	40	21	6	7	8	0	70	4	0	1	0	0	0	0	0	0	0	0	0	0	0	0	0	0	k__Fungi	p__Ascomycota	c__Eurotiomycetes	o__Eurotiales	f__Trichocomaceae	g__Penicillium	s__unidentified_Penicillium	SH028845.07FU_EU142884_reps
OTU6599	0	0	1	1	0	0	0	0	0	0	0	0	423	3	14	76	11	7	31	5	0	0	0	0	0	0	0	0	0	0	0	0	0	0	0	0	k__Fungi	p__Ascomycota	c__Eurotiomycetes	o__Eurotiales	f__Trichocomaceae	g__Penicillium	s__unidentified_Penicillium	SH005523.07FU_AF125938_reps
OTU6617	23	1	31	2	1	0	0	0	0	0	0	3	11	31	36	24	3	12	6	12	0	0	0	0	24	20	1	25	27	73	7	49	0	0	6	1	k__Fungi	p__Ascomycota	c__Eurotiomycetes	o__Eurotiales	f__Trichocomaceae	g__Penicillium	s__unidentified_Penicillium	SH016729.07FU_EU587315_refs
OTU6565	0	0	0	0	0	0	0	0	0	0	0	1	0	0	0	0	4	0	0	0	0	0	0	7	1	0	0	1	0	0	1	21	109	30	207	21	k__Fungi	p__Ascomycota	c__Eurotiomycetes	o__Eurotiales	f__Trichocomaceae	g__Penicillium	s__unidentified_Penicillium	SH491168.07FU_KT211865_reps_singleton
OTU6492	0	0	0	0	0	0	0	2	57	49	30	6	0	0	0	0	0	0	0	0	9	26	181	0	0	0	0	0	0	0	0	0	1	16	12	9	k__Fungi	p__Ascomycota	c__Eurotiomycetes	o__Eurotiales	f__Trichocomaceae	g__Penicillium	s__unidentified_Penicillium	New.ReferenceOTU245
OTU6547	0	2	23	0	0	3	0	0	0	0	0	0	4	41	27	36	5	21	38	3	2	0	0	0	19	27	4	17	90	15	3	4	0	0	1	0	k__Fungi	p__Ascomycota	c__Eurotiomycetes	o__Eurotiales	f__Trichocomaceae	g__Penicillium	s__unidentified_Penicillium	SH005503.07FU_AF125937_refs
OTU6481	0	1	15	13	0	4	0	18	2	12	7	9	129	0	4	0	27	23	52	11	0	0	0	0	0	0	0	0	0	0	0	0	0	0	0	0	k__Fungi	p__Ascomycota	c__Eurotiomycetes	o__Eurotiales	f__Trichocomaceae	g__Penicillium	s__unidentified_Penicillium	New.CleanUp.ReferenceOTU103315
OTU6126	0	0	0	0	0	0	0	0	0	0	0	0	0	0	0	0	0	0	0	0	0	0	0	0	0	0	0	0	0	0	0	0	75	55	20	5	k__Fungi	p__Ascomycota	c__Eurotiomycetes	o__Eurotiales	f__Trichocomaceae	g__Penicillium	s__unidentified_Penicillium	New.CleanUp.ReferenceOTU70585
OTU6112	0	0	0	0	0	0	0	0	0	0	0	0	0	0	0	0	1	6	0	0	0	0	0	0	4	9	3	104	8	2	10	2	0	0	0	0	k__Fungi	p__Ascomycota	c__Eurotiomycetes	o__Eurotiales	f__Trichocomaceae	g__Penicillium	s__unidentified_Penicillium	New.CleanUp.ReferenceOTU23617
OTU6035	3	0	3	2	44	4	12	0	0	0	0	4	18	0	2	0	3	7	20	0	3	0	0	0	0	1	0	0	0	0	0	0	0	0	0	0	k__Fungi	p__Ascomycota	c__Eurotiomycetes	o__Eurotiales	f__Trichocomaceae	g__Penicillium	s__unidentified_Penicillium	New.CleanUp.ReferenceOTU81357
OTU6056	40	12	0	18	25	0	4	7	0	0	0	0	0	5	0	0	0	0	0	0	1	0	1	0	0	0	0	0	0	0	0	0	1	0	0	0	k__Fungi	p__Ascomycota	c__Eurotiomycetes	o__Eurotiales	f__Trichocomaceae	g__Penicillium	s__unidentified_Penicillium	New.ReferenceOTU473
OTU5931	0	0	0	41	1	2	0	4	2	1	16	2	0	0	0	0	0	0	0	0	0	0	0	0	0	0	0	0	0	0	10	20	0	0	0	0	k__Fungi	p__Ascomycota	c__Eurotiomycetes	o__Eurotiales	f__Trichocomaceae	g__Penicillium	s__unidentified_Penicillium	SH005485.07FU_JN626097_refs
OTU5881	6	1	6	3	0	2	4	2	0	0	0	3	0	0	0	0	0	1	0	0	0	0	0	0	0	0	0	0	0	0	0	0	3	59	3	3	k__Fungi	p__Ascomycota	c__Eurotiomycetes	o__Eurotiales	f__Trichocomaceae	g__Penicillium	s__unidentified_Penicillium	New.CleanUp.ReferenceOTU120781
OTU6015	0	0	0	0	0	0	0	0	0	0	0	0	0	37	0	0	3	0	34	11	0	0	0	0	0	0	0	0	0	0	0	0	0	0	0	0	k__Fungi	p__Ascomycota	c__Eurotiomycetes	o__Eurotiales	f__Trichocomaceae	g__Penicillium	s__unidentified_Penicillium	New.CleanUp.ReferenceOTU102421
OTU5732	2	0	3	3	0	0	0	0	0	0	0	0	11	6	5	1	3	5	6	4	0	0	0	0	0	0	0	0	2	0	0	0	0	0	0	0	k__Fungi	p__Ascomycota	c__Eurotiomycetes	o__Eurotiales	f__Trichocomaceae	g__Penicillium	s__unidentified_Penicillium	New.ReferenceOTU864
OTU5783	0	0	0	0	0	0	0	0	1	0	0	0	0	0	0	0	0	2	0	0	0	0	0	0	1	8	2	13	3	4	7	9	0	0	0	0	k__Fungi	p__Ascomycota	c__Eurotiomycetes	o__Eurotiales	f__Trichocomaceae	g__Penicillium	s__unidentified_Penicillium	New.CleanUp.ReferenceOTU8205
OTU5622	0	0	0	0	0	2	0	0	0	0	0	0	21	0	0	0	5	2	4	13	0	1	0	0	0	0	0	0	0	0	0	0	0	0	0	0	k__Fungi	p__Ascomycota	c__Eurotiomycetes	o__Eurotiales	f__Trichocomaceae	g__Penicillium	s__unidentified_Penicillium	New.CleanUp.ReferenceOTU88995
OTU5479	0	0	0	0	42	2	0	0	0	0	0	0	0	0	0	1	0	0	0	0	0	0	0	0	0	0	0	0	0	0	0	0	0	0	0	0	k__Fungi	p__Ascomycota	c__Eurotiomycetes	o__Eurotiales	f__Trichocomaceae	g__Penicillium	s__unidentified_Penicillium	SH005554.07FU_KF673643_reps_singleton
OTU5288	6	0	0	0	0	2	3	0	10	0	4	11	0	0	0	0	0	0	0	0	0	0	0	0	0	0	0	0	0	0	0	0	0	0	0	0	k__Fungi	p__Ascomycota	c__Eurotiomycetes	o__Eurotiales	f__Trichocomaceae	g__Penicillium	s__unidentified_Penicillium	New.CleanUp.ReferenceOTU51706
OTU5285	0	0	0	0	0	0	0	0	0	0	0	0	0	0	0	0	0	1	0	0	0	0	0	0	0	5	1	19	1	1	1	2	0	0	0	0	k__Fungi	p__Ascomycota	c__Eurotiomycetes	o__Eurotiales	f__Trichocomaceae	g__Penicillium	s__unidentified_Penicillium	New.CleanUp.ReferenceOTU7061
OTU5289	0	0	0	0	0	1	1	0	0	0	0	0	2	0	0	0	0	3	0	0	0	0	0	0	1	4	1	3	3	4	2	5	0	0	1	0	k__Fungi	p__Ascomycota	c__Eurotiomycetes	o__Eurotiales	f__Trichocomaceae	g__Penicillium	s__unidentified_Penicillium	New.CleanUp.ReferenceOTU62204
OTU5116	0	0	0	1	0	0	0	0	0	0	8	13	0	0	0	0	0	0	0	0	1	0	0	0	0	0	0	0	0	0	0	0	1	2	3	0	k__Fungi	p__Ascomycota	c__Eurotiomycetes	o__Eurotiales	f__Trichocomaceae	g__Penicillium	s__unidentified_Penicillium	New.CleanUp.ReferenceOTU24695
OTU5304	0	0	0	0	0	0	2	4	0	0	0	0	1	4	1	1	1	3	2	4	0	1	0	0	1	0	0	0	1	2	1	0	0	0	0	0	k__Fungi	p__Ascomycota	c__Eurotiomycetes	o__Eurotiales	f__Trichocomaceae	g__Penicillium	s__unidentified_Penicillium	New.ReferenceOTU631
OTU5087	0	0	0	0	0	0	0	0	0	0	0	0	0	0	0	0	0	0	0	0	0	0	0	0	2	2	8	0	2	6	3	1	0	0	0	0	k__Fungi	p__Ascomycota	c__Eurotiomycetes	o__Eurotiales	f__Trichocomaceae	g__Penicillium	s__unidentified_Penicillium	SH005553.07FU_EU427300_refs
OTU5042	0	0	0	0	0	0	0	0	0	0	0	0	0	0	0	0	0	1	0	0	0	0	0	0	0	2	0	13	0	0	2	2	0	1	0	0	k__Fungi	p__Ascomycota	c__Eurotiomycetes	o__Eurotiales	f__Trichocomaceae	g__Penicillium	s__unidentified_Penicillium	New.CleanUp.ReferenceOTU25626
OTU5193	0	0	0	0	0	0	0	0	0	0	0	0	0	6	0	0	2	0	5	0	0	0	0	0	0	1	0	0	0	2	0	3	0	0	1	0	k__Fungi	p__Ascomycota	c__Eurotiomycetes	o__Eurotiales	f__Trichocomaceae	g__Penicillium	s__unidentified_Penicillium	New.CleanUp.ReferenceOTU6376
OTU5281	0	0	0	0	0	0	2	0	0	0	0	3	0	6	3	1	0	0	0	0	0	0	0	0	0	2	1	1	1	0	0	0	0	0	0	0	k__Fungi	p__Ascomycota	c__Eurotiomycetes	o__Eurotiales	f__Trichocomaceae	g__Penicillium	s__unidentified_Penicillium	New.ReferenceOTU130
OTU5066	0	0	0	0	0	0	1	0	1	0	0	0	2	0	0	0	0	0	0	0	1	2	3	0	0	0	0	0	0	0	0	0	7	0	0	2	k__Fungi	p__Ascomycota	c__Eurotiomycetes	o__Eurotiales	f__Trichocomaceae	g__Penicillium	s__unidentified_Penicillium	New.CleanUp.ReferenceOTU2283
OTU5006	0	0	0	0	0	0	7	0	0	0	0	0	0	1	0	0	0	0	0	4	0	0	0	0	0	0	0	0	0	0	0	5	0	0	0	0	k__Fungi	p__Ascomycota	c__Eurotiomycetes	o__Eurotiales	f__Trichocomaceae	g__Penicillium	s__unidentified_Penicillium	New.CleanUp.ReferenceOTU22609
OTU4753	0	0	0	0	0	0	0	0	0	0	0	0	0	0	0	0	0	0	0	0	0	0	0	0	2	1	0	0	13	0	0	0	0	0	0	0	k__Fungi	p__Ascomycota	c__Eurotiomycetes	o__Eurotiales	f__Trichocomaceae	g__Penicillium	s__unidentified_Penicillium	New.ReferenceOTU60
OTU4972	0	0	0	0	0	0	0	0	0	0	0	0	0	0	0	0	0	0	0	0	0	0	0	0	2	9	0	0	0	5	0	0	0	0	0	0	k__Fungi	p__Ascomycota	c__Eurotiomycetes	o__Eurotiales	f__Trichocomaceae	g__Penicillium	s__unidentified_Penicillium	SH005501.07FU_JN686433_refs
OTU4716	0	0	0	0	0	1	7	0	3	2	2	0	0	0	0	0	0	0	0	0	0	0	0	0	0	0	0	0	0	0	0	0	0	0	0	0	k__Fungi	p__Ascomycota	c__Eurotiomycetes	o__Eurotiales	f__Trichocomaceae	g__Penicillium	s__unidentified_Penicillium	New.CleanUp.ReferenceOTU100836
OTU4902	0	0	0	0	0	0	0	1	0	0	0	0	0	0	0	0	0	1	13	0	0	0	0	0	0	0	0	0	0	0	0	0	0	0	0	0	k__Fungi	p__Ascomycota	c__Eurotiomycetes	o__Eurotiales	f__Trichocomaceae	g__Penicillium	s__unidentified_Penicillium	New.CleanUp.ReferenceOTU66276
OTU5091	0	0	0	0	0	0	0	0	0	0	0	0	0	0	1	3	10	0	0	0	0	1	0	0	0	0	0	0	0	0	0	0	0	0	0	0	k__Fungi	p__Ascomycota	c__Eurotiomycetes	o__Eurotiales	f__Trichocomaceae	g__Penicillium	s__unidentified_Penicillium	SH017810.07FU_JF439501_reps
OTU4579	2	0	0	0	0	0	0	0	0	0	0	0	0	0	0	0	0	0	0	2	0	7	0	0	2	0	0	0	0	1	0	0	0	0	0	0	k__Fungi	p__Ascomycota	c__Eurotiomycetes	o__Eurotiales	f__Trichocomaceae	g__Penicillium	s__unidentified_Penicillium	SH496542.07FU_KM277956_reps_singleton
OTU4584	0	0	0	0	0	0	0	0	0	0	0	0	0	0	0	0	0	0	0	0	0	0	0	0	1	1	3	3	0	2	4	0	0	0	0	0	k__Fungi	p__Ascomycota	c__Eurotiomycetes	o__Eurotiales	f__Trichocomaceae	g__Penicillium	s__unidentified_Penicillium	New.CleanUp.ReferenceOTU9213
OTU4446	0	0	0	0	12	1	0	0	0	0	0	0	0	0	0	0	0	0	0	0	0	0	0	0	0	0	0	0	0	0	0	0	0	0	0	0	k__Fungi	p__Ascomycota	c__Eurotiomycetes	o__Eurotiales	f__Trichocomaceae	g__Penicillium	s__unidentified_Penicillium	SH005531.07FU_KC773833_refs_singleton
OTU4536	0	0	0	0	0	0	0	0	0	0	0	0	0	0	0	0	0	0	0	0	0	0	0	0	2	0	2	1	1	0	5	2	0	0	0	0	k__Fungi	p__Ascomycota	c__Eurotiomycetes	o__Eurotiales	f__Trichocomaceae	g__Penicillium	s__unidentified_Penicillium	New.CleanUp.ReferenceOTU56531
OTU4648	0	0	0	0	0	0	0	0	0	0	0	0	0	0	0	0	0	1	0	0	0	0	0	0	4	0	2	2	1	0	2	1	0	0	0	0	k__Fungi	p__Ascomycota	c__Eurotiomycetes	o__Eurotiales	f__Trichocomaceae	g__Penicillium	s__unidentified_Penicillium	New.CleanUp.ReferenceOTU81022
OTU4473	0	0	0	0	0	0	2	0	0	0	0	0	0	0	0	0	0	0	0	0	0	0	0	0	0	0	1	5	0	1	3	0	0	0	0	0	k__Fungi	p__Ascomycota	c__Eurotiomycetes	o__Eurotiales	f__Trichocomaceae	g__Penicillium	s__unidentified_Penicillium	New.CleanUp.ReferenceOTU79189
OTU4477	0	0	0	0	0	0	0	0	0	0	0	0	0	0	0	0	0	0	0	0	0	0	0	0	2	3	0	5	2	0	0	0	0	0	0	0	k__Fungi	p__Ascomycota	c__Eurotiomycetes	o__Eurotiales	f__Trichocomaceae	g__Penicillium	s__unidentified_Penicillium	New.CleanUp.ReferenceOTU104498
OTU4481	0	0	0	0	0	0	1	0	0	0	0	0	0	0	0	0	0	1	0	0	0	0	0	0	0	0	0	4	0	3	3	0	0	0	0	0	k__Fungi	p__Ascomycota	c__Eurotiomycetes	o__Eurotiales	f__Trichocomaceae	g__Penicillium	s__unidentified_Penicillium	New.CleanUp.ReferenceOTU117925
OTU4758	0	0	0	0	0	0	0	0	0	0	0	0	0	0	0	0	0	1	0	0	0	0	0	0	1	1	0	1	1	3	2	2	0	0	0	0	k__Fungi	p__Ascomycota	c__Eurotiomycetes	o__Eurotiales	f__Trichocomaceae	g__Penicillium	s__unidentified_Penicillium	New.CleanUp.ReferenceOTU23168
OTU4471	0	0	0	0	0	1	0	0	0	0	0	0	0	0	0	0	0	0	1	0	0	0	0	0	0	3	0	4	0	1	0	1	0	0	0	0	k__Fungi	p__Ascomycota	c__Eurotiomycetes	o__Eurotiales	f__Trichocomaceae	g__Penicillium	s__unidentified_Penicillium	New.CleanUp.ReferenceOTU69797
OTU4475	0	0	0	0	0	0	0	0	0	0	0	0	0	0	0	0	0	0	0	0	0	0	0	0	1	3	0	4	1	0	2	0	0	0	0	0	k__Fungi	p__Ascomycota	c__Eurotiomycetes	o__Eurotiales	f__Trichocomaceae	g__Penicillium	s__unidentified_Penicillium	New.CleanUp.ReferenceOTU88384
OTU4308	0	0	0	0	0	0	1	0	0	0	0	0	0	0	0	0	0	0	0	0	0	0	0	0	1	1	1	6	0	0	0	0	0	0	0	0	k__Fungi	p__Ascomycota	c__Eurotiomycetes	o__Eurotiales	f__Trichocomaceae	g__Penicillium	s__unidentified_Penicillium	New.CleanUp.ReferenceOTU66967
OTU4095	0	0	0	0	0	0	0	0	0	0	0	0	0	7	0	0	0	0	0	0	0	0	0	0	2	0	0	0	0	0	0	0	0	0	0	0	k__Fungi	p__Ascomycota	c__Eurotiomycetes	o__Eurotiales	f__Trichocomaceae	g__Penicillium	s__unidentified_Penicillium	New.CleanUp.ReferenceOTU41626
OTU4316	0	0	0	0	0	0	0	0	0	0	0	0	0	0	0	0	0	1	0	0	0	0	0	0	0	2	0	3	0	0	1	2	0	0	0	0	k__Fungi	p__Ascomycota	c__Eurotiomycetes	o__Eurotiales	f__Trichocomaceae	g__Penicillium	s__unidentified_Penicillium	New.CleanUp.ReferenceOTU117338
OTU4653	0	0	0	0	0	0	0	0	0	0	0	0	0	0	0	0	0	0	0	0	0	0	0	0	0	0	1	0	4	1	2	1	0	0	0	0	k__Fungi	p__Ascomycota	c__Eurotiomycetes	o__Eurotiales	f__Trichocomaceae	g__Penicillium	s__unidentified_Penicillium	New.CleanUp.ReferenceOTU103634
OTU4694	0	0	0	0	0	0	0	0	0	0	0	0	0	0	0	0	0	0	0	0	0	0	0	0	0	0	0	0	0	0	0	5	0	0	4	0	k__Fungi	p__Ascomycota	c__Eurotiomycetes	o__Eurotiales	f__Trichocomaceae	g__Penicillium	s__unidentified_Penicillium	New.CleanUp.ReferenceOTU10522
OTU3961	0	0	0	0	0	0	0	0	0	0	0	0	0	0	0	0	0	0	0	0	0	0	0	0	0	1	0	5	1	0	1	0	0	0	0	0	k__Fungi	p__Ascomycota	c__Eurotiomycetes	o__Eurotiales	f__Trichocomaceae	g__Penicillium	s__unidentified_Penicillium	New.CleanUp.ReferenceOTU49524
OTU3962	0	0	0	0	0	0	0	0	0	0	0	0	0	0	0	0	0	2	0	0	0	0	0	0	0	0	1	3	0	0	1	0	0	0	0	1	k__Fungi	p__Ascomycota	c__Eurotiomycetes	o__Eurotiales	f__Trichocomaceae	g__Penicillium	s__unidentified_Penicillium	New.CleanUp.ReferenceOTU50858
OTU4113	0	0	0	0	0	0	0	0	0	0	0	0	0	0	0	0	0	0	0	0	0	0	0	0	0	1	1	2	0	2	1	0	0	0	0	0	k__Fungi	p__Ascomycota	c__Eurotiomycetes	o__Eurotiales	f__Trichocomaceae	g__Penicillium	s__unidentified_Penicillium	New.CleanUp.ReferenceOTU118075
OTU3608	0	0	0	0	2	0	0	0	0	0	0	0	1	0	0	0	0	1	0	0	0	0	0	0	0	0	0	0	0	0	1	1	0	0	0	0	k__Fungi	p__Ascomycota	c__Eurotiomycetes	o__Eurotiales	f__Trichocomaceae	g__Penicillium	s__unidentified_Penicillium	New.CleanUp.ReferenceOTU16083
OTU3621	0	0	0	0	0	0	0	0	0	0	0	0	0	0	0	0	0	0	0	0	0	0	0	0	0	2	1	0	1	0	2	0	0	0	0	0	k__Fungi	p__Ascomycota	c__Eurotiomycetes	o__Eurotiales	f__Trichocomaceae	g__Penicillium	s__unidentified_Penicillium	New.CleanUp.ReferenceOTU55981
OTU3789	0	0	0	0	0	0	0	0	0	0	0	0	0	0	0	0	0	0	0	0	0	0	0	0	0	0	1	1	0	2	2	0	0	0	0	0	k__Fungi	p__Ascomycota	c__Eurotiomycetes	o__Eurotiales	f__Trichocomaceae	g__Penicillium	s__unidentified_Penicillium	New.CleanUp.ReferenceOTU22604
OTU3971	0	0	0	0	0	0	0	0	0	0	0	0	0	0	0	0	0	0	0	0	0	0	0	0	0	1	0	5	0	0	0	0	0	0	0	0	k__Fungi	p__Ascomycota	c__Eurotiomycetes	o__Eurotiales	f__Trichocomaceae	g__Penicillium	s__unidentified_Penicillium	New.CleanUp.ReferenceOTU79641
OTU3978	0	0	0	0	0	0	0	0	0	0	0	0	0	0	0	0	0	0	0	0	0	0	0	0	0	1	1	2	0	1	1	0	0	0	0	0	k__Fungi	p__Ascomycota	c__Eurotiomycetes	o__Eurotiales	f__Trichocomaceae	g__Penicillium	s__unidentified_Penicillium	New.CleanUp.ReferenceOTU94288
OTU4062	0	0	0	0	0	0	0	0	0	0	0	0	0	0	0	0	0	0	0	0	0	0	0	0	0	1	0	0	5	0	0	0	0	0	0	0	k__Fungi	p__Ascomycota	c__Eurotiomycetes	o__Eurotiales	f__Trichocomaceae	g__Penicillium	s__unidentified_Penicillium	SH027145.07FU_AF033400_refs
OTU4098	0	0	0	0	0	0	0	0	0	0	0	0	0	0	0	0	0	1	0	0	0	0	0	0	0	2	0	1	0	0	2	0	0	0	0	0	k__Fungi	p__Ascomycota	c__Eurotiomycetes	o__Eurotiales	f__Trichocomaceae	g__Penicillium	s__unidentified_Penicillium	New.CleanUp.ReferenceOTU53873
OTU4393	0	0	0	0	0	0	0	0	0	0	0	0	0	0	0	0	0	0	0	0	0	0	0	0	0	0	0	0	0	0	0	0	0	0	4	2	k__Fungi	p__Ascomycota	c__Eurotiomycetes	o__Eurotiales	f__Trichocomaceae	g__Penicillium	s__unidentified_Penicillium	New.CleanUp.ReferenceOTU85552
OTU4478	0	0	0	0	0	0	0	0	0	0	0	0	0	0	0	0	0	0	6	0	0	0	0	0	0	0	0	0	0	0	0	0	0	0	0	0	k__Fungi	p__Ascomycota	c__Eurotiomycetes	o__Eurotiales	f__Trichocomaceae	g__Penicillium	s__unidentified_Penicillium	New.CleanUp.ReferenceOTU112608
OTU3606	0	0	0	0	0	0	0	0	0	0	0	0	0	0	0	0	0	0	0	0	0	0	0	0	2	1	0	2	0	0	0	0	0	0	0	0	k__Fungi	p__Ascomycota	c__Eurotiomycetes	o__Eurotiales	f__Trichocomaceae	g__Penicillium	s__unidentified_Penicillium	New.CleanUp.ReferenceOTU4255
OTU3609	0	0	0	0	0	0	0	0	0	0	0	0	0	0	0	0	0	0	0	0	0	0	0	0	0	0	0	4	0	0	0	1	0	0	0	0	k__Fungi	p__Ascomycota	c__Eurotiomycetes	o__Eurotiales	f__Trichocomaceae	g__Penicillium	s__unidentified_Penicillium	New.CleanUp.ReferenceOTU16474
OTU3637	0	0	0	0	0	0	0	0	0	0	0	0	0	0	0	0	0	0	0	0	0	0	0	0	0	1	0	4	0	0	0	0	0	0	0	0	k__Fungi	p__Ascomycota	c__Eurotiomycetes	o__Eurotiales	f__Trichocomaceae	g__Penicillium	s__unidentified_Penicillium	New.CleanUp.ReferenceOTU87996
OTU3644	0	0	0	0	0	0	0	0	0	0	0	0	0	0	0	0	0	0	0	0	0	0	0	0	0	1	1	2	0	0	0	1	0	0	0	0	k__Fungi	p__Ascomycota	c__Eurotiomycetes	o__Eurotiales	f__Trichocomaceae	g__Penicillium	s__unidentified_Penicillium	New.CleanUp.ReferenceOTU100937
OTU3647	0	0	0	0	0	0	0	0	0	0	0	0	0	0	0	0	0	1	0	0	0	0	0	0	0	1	0	0	1	0	0	2	0	0	0	0	k__Fungi	p__Ascomycota	c__Eurotiomycetes	o__Eurotiales	f__Trichocomaceae	g__Penicillium	s__unidentified_Penicillium	New.CleanUp.ReferenceOTU110260
OTU3763	0	0	0	0	0	0	0	0	0	5	0	0	0	0	0	0	0	0	0	0	0	0	0	0	0	0	0	0	0	0	0	0	0	0	0	0	k__Fungi	p__Ascomycota	c__Eurotiomycetes	o__Eurotiales	f__Trichocomaceae	g__Penicillium	s__unidentified_Penicillium	SH005544.07FU_KJ834508_refs
OTU3822	0	0	0	0	0	0	0	0	0	0	0	0	0	0	0	0	0	1	0	0	0	0	0	0	0	0	0	0	1	0	2	1	0	0	0	0	k__Fungi	p__Ascomycota	c__Eurotiomycetes	o__Eurotiales	f__Trichocomaceae	g__Penicillium	s__unidentified_Penicillium	New.CleanUp.ReferenceOTU121837
OTU3966	0	0	0	0	0	0	0	0	0	0	0	0	0	0	0	0	0	0	0	0	0	0	0	0	1	0	2	0	0	1	1	0	0	0	0	0	k__Fungi	p__Ascomycota	c__Eurotiomycetes	o__Eurotiales	f__Trichocomaceae	g__Penicillium	s__unidentified_Penicillium	New.CleanUp.ReferenceOTU67532
OTU3029	0	0	0	0	0	0	0	0	0	0	0	0	0	0	0	0	0	2	0	0	0	0	0	0	1	0	1	0	0	0	0	0	0	0	0	0	k__Fungi	p__Ascomycota	c__Eurotiomycetes	o__Eurotiales	f__Trichocomaceae	g__Penicillium	s__unidentified_Penicillium	New.CleanUp.ReferenceOTU19701
OTU3059	0	0	0	0	0	0	0	1	0	0	0	0	3	0	0	0	0	0	0	0	0	0	0	0	0	0	0	0	0	0	0	0	0	0	0	0	k__Fungi	p__Ascomycota	c__Eurotiomycetes	o__Eurotiales	f__Trichocomaceae	g__Penicillium	s__unidentified_Penicillium	New.CleanUp.ReferenceOTU45295
OTU3076	0	0	0	0	0	0	0	0	0	0	0	0	0	3	0	0	0	0	0	0	0	0	0	0	0	0	0	0	1	0	0	0	0	0	0	0	k__Fungi	p__Ascomycota	c__Eurotiomycetes	o__Eurotiales	f__Trichocomaceae	g__Penicillium	s__unidentified_Penicillium	New.CleanUp.ReferenceOTU65006
OTU3083	0	0	0	0	0	0	0	0	0	0	0	0	0	0	0	0	0	0	0	0	0	0	0	0	0	1	0	2	0	1	0	0	0	0	0	0	k__Fungi	p__Ascomycota	c__Eurotiomycetes	o__Eurotiales	f__Trichocomaceae	g__Penicillium	s__unidentified_Penicillium	New.CleanUp.ReferenceOTU73104
OTU3097	0	0	0	0	0	0	0	0	0	0	0	0	0	0	0	0	1	0	0	0	0	0	1	0	0	0	0	0	0	0	0	0	2	0	0	0	k__Fungi	p__Ascomycota	c__Eurotiomycetes	o__Eurotiales	f__Trichocomaceae	g__Penicillium	s__unidentified_Penicillium	New.CleanUp.ReferenceOTU82624
OTU3120	0	0	0	0	0	0	0	0	0	0	0	0	0	0	0	0	0	0	0	0	0	0	0	0	0	0	0	0	0	0	1	0	0	1	1	1	k__Fungi	p__Ascomycota	c__Eurotiomycetes	o__Eurotiales	f__Trichocomaceae	g__Penicillium	s__unidentified_Penicillium	New.CleanUp.ReferenceOTU111903
OTU3393	0	0	0	0	0	0	0	0	0	0	0	0	0	0	0	0	0	0	0	0	0	0	0	0	0	0	0	2	0	0	1	1	0	0	0	0	k__Fungi	p__Ascomycota	c__Eurotiomycetes	o__Eurotiales	f__Trichocomaceae	g__Penicillium	s__unidentified_Penicillium	New.CleanUp.ReferenceOTU43035
OTU3405	0	0	0	0	0	0	0	0	0	0	0	0	0	0	0	0	0	0	0	0	0	0	0	0	1	0	0	0	1	0	1	0	0	0	0	1	k__Fungi	p__Ascomycota	c__Eurotiomycetes	o__Eurotiales	f__Trichocomaceae	g__Penicillium	s__unidentified_Penicillium	New.CleanUp.ReferenceOTU67807
OTU3432	0	0	0	0	0	0	0	0	0	0	0	0	0	0	0	0	0	1	0	0	0	0	0	0	0	0	0	0	0	1	1	0	0	0	1	0	k__Fungi	p__Ascomycota	c__Eurotiomycetes	o__Eurotiales	f__Trichocomaceae	g__Penicillium	s__unidentified_Penicillium	New.CleanUp.ReferenceOTU103034
OTU2461	1	0	0	0	0	0	0	0	0	0	0	0	0	0	0	0	1	0	0	0	0	0	0	0	0	0	1	0	0	0	0	0	0	0	0	0	k__Fungi	p__Ascomycota	c__Eurotiomycetes	o__Eurotiales	f__Trichocomaceae	g__Penicillium	s__unidentified_Penicillium	SH022275.07FU_KM189708_refs
OTU2469	0	0	0	1	1	0	1	0	0	0	0	0	0	0	0	0	0	0	0	0	0	0	0	0	0	0	0	0	0	0	0	0	0	0	0	0	k__Fungi	p__Ascomycota	c__Eurotiomycetes	o__Eurotiales	f__Trichocomaceae	g__Penicillium	s__unidentified_Penicillium	New.ReferenceOTU127
OTU2477	0	0	0	0	0	0	0	0	0	0	0	0	0	0	0	0	0	0	0	0	0	0	0	0	0	1	0	0	1	0	1	0	0	0	0	0	k__Fungi	p__Ascomycota	c__Eurotiomycetes	o__Eurotiales	f__Trichocomaceae	g__Penicillium	s__unidentified_Penicillium	New.CleanUp.ReferenceOTU3989
OTU2484	0	0	0	0	0	0	0	0	0	0	0	0	0	0	0	0	0	0	0	0	0	0	0	0	0	0	0	1	0	0	2	0	0	0	0	0	k__Fungi	p__Ascomycota	c__Eurotiomycetes	o__Eurotiales	f__Trichocomaceae	g__Penicillium	s__unidentified_Penicillium	New.CleanUp.ReferenceOTU8719
OTU2486	0	0	1	0	2	0	0	0	0	0	0	0	0	0	0	0	0	0	0	0	0	0	0	0	0	0	0	0	0	0	0	0	0	0	0	0	k__Fungi	p__Ascomycota	c__Eurotiomycetes	o__Eurotiales	f__Trichocomaceae	g__Penicillium	s__unidentified_Penicillium	New.CleanUp.ReferenceOTU11109
OTU2493	0	0	0	0	0	0	1	0	0	0	0	0	0	0	0	0	0	0	0	0	0	0	0	0	0	1	0	0	0	0	0	0	0	0	1	0	k__Fungi	p__Ascomycota	c__Eurotiomycetes	o__Eurotiales	f__Trichocomaceae	g__Penicillium	s__unidentified_Penicillium	New.CleanUp.ReferenceOTU15464
OTU2496	0	0	0	0	0	0	0	0	0	0	0	0	0	0	0	0	0	0	0	0	0	0	0	0	0	1	0	2	0	0	0	0	0	0	0	0	k__Fungi	p__Ascomycota	c__Eurotiomycetes	o__Eurotiales	f__Trichocomaceae	g__Penicillium	s__unidentified_Penicillium	New.CleanUp.ReferenceOTU16697
OTU2497	0	0	0	0	0	0	1	0	0	0	0	0	0	0	0	0	0	0	0	0	0	0	0	0	1	0	0	0	0	1	0	0	0	0	0	0	k__Fungi	p__Ascomycota	c__Eurotiomycetes	o__Eurotiales	f__Trichocomaceae	g__Penicillium	s__unidentified_Penicillium	New.CleanUp.ReferenceOTU17257
OTU2511	0	0	0	0	0	0	0	0	0	0	0	0	0	0	0	0	0	1	0	0	0	0	0	0	0	0	1	0	0	0	1	0	0	0	0	0	k__Fungi	p__Ascomycota	c__Eurotiomycetes	o__Eurotiales	f__Trichocomaceae	g__Penicillium	s__unidentified_Penicillium	New.CleanUp.ReferenceOTU25557
OTU2517	0	0	0	0	0	0	0	0	0	0	0	0	0	0	0	0	0	0	0	0	0	0	0	0	1	1	0	0	0	0	1	0	0	0	0	0	k__Fungi	p__Ascomycota	c__Eurotiomycetes	o__Eurotiales	f__Trichocomaceae	g__Penicillium	s__unidentified_Penicillium	New.CleanUp.ReferenceOTU28556
OTU2542	0	0	0	0	0	0	0	0	0	0	0	0	0	0	0	0	0	0	1	0	0	0	0	0	0	0	0	0	0	0	0	0	1	0	0	1	k__Fungi	p__Ascomycota	c__Eurotiomycetes	o__Eurotiales	f__Trichocomaceae	g__Penicillium	s__unidentified_Penicillium	New.CleanUp.ReferenceOTU45359
OTU2545	0	0	0	0	0	0	0	0	0	0	0	0	0	0	0	0	0	0	0	0	0	0	0	0	0	0	1	1	0	0	0	1	0	0	0	0	k__Fungi	p__Ascomycota	c__Eurotiomycetes	o__Eurotiales	f__Trichocomaceae	g__Penicillium	s__unidentified_Penicillium	New.CleanUp.ReferenceOTU45638
OTU2554	0	0	0	0	0	0	0	0	0	0	0	0	0	0	0	0	0	0	0	0	0	0	0	0	0	1	1	1	0	0	0	0	0	0	0	0	k__Fungi	p__Ascomycota	c__Eurotiomycetes	o__Eurotiales	f__Trichocomaceae	g__Penicillium	s__unidentified_Penicillium	New.CleanUp.ReferenceOTU56440
OTU2559	0	0	0	0	0	0	0	0	0	0	0	0	0	0	0	0	0	0	0	0	0	0	0	0	0	0	0	0	1	0	1	1	0	0	0	0	k__Fungi	p__Ascomycota	c__Eurotiomycetes	o__Eurotiales	f__Trichocomaceae	g__Penicillium	s__unidentified_Penicillium	New.CleanUp.ReferenceOTU61964
OTU2562	0	0	0	0	0	0	0	0	0	0	0	0	0	0	0	0	0	0	0	0	0	0	0	0	0	0	0	1	2	0	0	0	0	0	0	0	k__Fungi	p__Ascomycota	c__Eurotiomycetes	o__Eurotiales	f__Trichocomaceae	g__Penicillium	s__unidentified_Penicillium	New.CleanUp.ReferenceOTU63777
OTU2568	0	0	0	0	0	0	0	0	0	0	0	0	0	0	0	0	0	0	0	0	0	0	0	0	0	0	0	0	0	0	0	0	1	0	2	0	k__Fungi	p__Ascomycota	c__Eurotiomycetes	o__Eurotiales	f__Trichocomaceae	g__Penicillium	s__unidentified_Penicillium	New.CleanUp.ReferenceOTU66853
OTU2570	0	0	0	0	0	0	0	0	0	0	0	0	0	0	0	0	0	0	0	0	0	0	0	0	1	0	0	2	0	0	0	0	0	0	0	0	k__Fungi	p__Ascomycota	c__Eurotiomycetes	o__Eurotiales	f__Trichocomaceae	g__Penicillium	s__unidentified_Penicillium	New.CleanUp.ReferenceOTU67400
OTU2577	0	0	0	0	0	0	0	0	0	0	0	0	0	0	0	0	0	1	0	0	0	0	0	0	1	0	0	0	0	0	1	0	0	0	0	0	k__Fungi	p__Ascomycota	c__Eurotiomycetes	o__Eurotiales	f__Trichocomaceae	g__Penicillium	s__unidentified_Penicillium	New.CleanUp.ReferenceOTU72057
OTU2598	0	0	0	0	0	0	0	0	0	0	0	0	0	0	0	0	0	1	0	0	0	0	0	0	0	1	0	0	0	0	1	0	0	0	0	0	k__Fungi	p__Ascomycota	c__Eurotiomycetes	o__Eurotiales	f__Trichocomaceae	g__Penicillium	s__unidentified_Penicillium	New.CleanUp.ReferenceOTU87138
OTU2601	0	0	0	0	0	0	0	0	0	0	0	0	0	0	0	0	0	1	0	0	0	0	0	0	0	0	0	0	0	0	0	0	0	0	1	1	k__Fungi	p__Ascomycota	c__Eurotiomycetes	o__Eurotiales	f__Trichocomaceae	g__Penicillium	s__unidentified_Penicillium	New.CleanUp.ReferenceOTU90777
OTU2605	0	0	0	2	0	0	0	1	0	0	0	0	0	0	0	0	0	0	0	0	0	0	0	0	0	0	0	0	0	0	0	0	0	0	0	0	k__Fungi	p__Ascomycota	c__Eurotiomycetes	o__Eurotiales	f__Trichocomaceae	g__Penicillium	s__unidentified_Penicillium	New.CleanUp.ReferenceOTU93137
OTU2614	0	0	0	0	0	0	0	0	0	0	0	0	0	2	0	0	0	0	0	1	0	0	0	0	0	0	0	0	0	0	0	0	0	0	0	0	k__Fungi	p__Ascomycota	c__Eurotiomycetes	o__Eurotiales	f__Trichocomaceae	g__Penicillium	s__unidentified_Penicillium	New.CleanUp.ReferenceOTU100284
OTU2620	0	0	0	0	0	0	0	0	0	0	0	0	0	0	0	0	0	1	0	0	0	0	0	0	0	0	0	1	0	0	0	0	0	1	0	0	k__Fungi	p__Ascomycota	c__Eurotiomycetes	o__Eurotiales	f__Trichocomaceae	g__Penicillium	s__unidentified_Penicillium	New.CleanUp.ReferenceOTU103899
OTU2622	0	0	0	0	0	0	0	0	0	0	0	0	0	0	0	0	0	0	0	0	0	0	0	0	0	0	1	1	0	0	0	1	0	0	0	0	k__Fungi	p__Ascomycota	c__Eurotiomycetes	o__Eurotiales	f__Trichocomaceae	g__Penicillium	s__unidentified_Penicillium	New.CleanUp.ReferenceOTU106559
OTU2623	0	0	0	0	0	0	0	0	0	0	0	0	0	0	0	0	0	0	0	0	0	0	0	0	0	1	0	2	0	0	0	0	0	0	0	0	k__Fungi	p__Ascomycota	c__Eurotiomycetes	o__Eurotiales	f__Trichocomaceae	g__Penicillium	s__unidentified_Penicillium	New.CleanUp.ReferenceOTU106751
OTU2624	0	0	0	0	0	0	0	0	0	0	0	0	0	0	0	0	0	0	0	0	0	0	0	0	0	0	0	0	0	0	0	2	0	1	0	0	k__Fungi	p__Ascomycota	c__Eurotiomycetes	o__Eurotiales	f__Trichocomaceae	g__Penicillium	s__unidentified_Penicillium	New.CleanUp.ReferenceOTU107043
OTU2625	0	0	0	0	0	0	0	0	0	0	0	0	0	0	0	0	0	0	0	0	0	0	0	0	0	0	1	1	1	0	0	0	0	0	0	0	k__Fungi	p__Ascomycota	c__Eurotiomycetes	o__Eurotiales	f__Trichocomaceae	g__Penicillium	s__unidentified_Penicillium	New.CleanUp.ReferenceOTU109220
OTU3033	0	0	0	0	0	0	0	0	0	0	0	0	0	0	0	0	0	1	0	0	0	0	0	0	0	0	0	0	0	1	1	0	0	0	0	0	k__Fungi	p__Ascomycota	c__Eurotiomycetes	o__Eurotiales	f__Trichocomaceae	g__Penicillium	s__unidentified_Penicillium	New.CleanUp.ReferenceOTU23188
OTU3063	0	0	0	0	0	0	0	0	0	0	0	0	0	0	0	0	0	0	0	0	0	0	0	0	0	1	1	0	0	0	1	0	0	0	0	0	k__Fungi	p__Ascomycota	c__Eurotiomycetes	o__Eurotiales	f__Trichocomaceae	g__Penicillium	s__unidentified_Penicillium	New.CleanUp.ReferenceOTU54248
OTU3068	0	0	0	0	0	0	0	0	0	0	0	0	0	0	0	0	0	0	0	0	0	0	0	0	0	0	0	0	1	0	0	0	0	0	2	0	k__Fungi	p__Ascomycota	c__Eurotiomycetes	o__Eurotiales	f__Trichocomaceae	g__Penicillium	s__unidentified_Penicillium	New.CleanUp.ReferenceOTU56778
OTU3109	0	0	0	0	0	0	0	0	0	0	0	0	1	0	0	0	0	0	0	0	0	0	0	0	0	0	0	0	0	0	0	0	1	0	1	0	k__Fungi	p__Ascomycota	c__Eurotiomycetes	o__Eurotiales	f__Trichocomaceae	g__Penicillium	s__unidentified_Penicillium	New.CleanUp.ReferenceOTU97457
OTU3376	0	0	1	0	0	0	0	0	0	0	0	0	0	0	1	0	0	0	0	0	0	0	0	0	0	0	0	0	0	0	0	0	0	0	1	0	k__Fungi	p__Ascomycota	c__Eurotiomycetes	o__Eurotiales	f__Trichocomaceae	g__Penicillium	s__unidentified_Penicillium	New.CleanUp.ReferenceOTU22849
OTU3645	0	0	0	0	0	0	0	0	0	0	0	0	0	0	0	0	0	0	0	0	0	0	0	0	0	0	0	2	0	1	0	0	0	0	0	0	k__Fungi	p__Ascomycota	c__Eurotiomycetes	o__Eurotiales	f__Trichocomaceae	g__Penicillium	s__unidentified_Penicillium	New.CleanUp.ReferenceOTU103498
OTU4306	0	0	0	0	0	0	0	0	0	0	0	0	0	0	0	0	0	0	0	0	0	0	0	0	0	0	0	1	0	0	1	1	0	0	0	0	k__Fungi	p__Ascomycota	c__Eurotiomycetes	o__Eurotiales	f__Trichocomaceae	g__Penicillium	s__unidentified_Penicillium	New.CleanUp.ReferenceOTU62968
OTU1185	0	0	0	0	0	0	1	0	0	0	0	0	0	0	0	0	0	0	0	0	0	0	0	0	0	0	0	0	0	1	0	0	0	0	0	0	k__Fungi	p__Ascomycota	c__Eurotiomycetes	o__Eurotiales	f__Trichocomaceae	g__Penicillium	s__unidentified_Penicillium	SH005538.07FU_FJ820831_reps_singleton
OTU1244	1	1	0	0	0	0	0	0	0	0	0	0	0	0	0	0	0	0	0	0	0	0	0	0	0	0	0	0	0	0	0	0	0	0	0	0	k__Fungi	p__Ascomycota	c__Eurotiomycetes	o__Eurotiales	f__Trichocomaceae	g__Penicillium	s__unidentified_Penicillium	SH022001.07FU_GU981574_refs
OTU1268	0	0	0	0	0	0	0	0	0	0	0	0	0	0	0	0	0	0	0	0	0	0	0	0	0	1	0	1	0	0	0	0	0	0	0	0	k__Fungi	p__Ascomycota	c__Eurotiomycetes	o__Eurotiales	f__Trichocomaceae	g__Penicillium	s__unidentified_Penicillium	New.CleanUp.ReferenceOTU2022
OTU1276	0	0	0	0	0	0	0	0	0	0	0	0	0	0	0	0	0	0	0	0	0	0	0	0	0	0	0	1	0	0	1	0	0	0	0	0	k__Fungi	p__Ascomycota	c__Eurotiomycetes	o__Eurotiales	f__Trichocomaceae	g__Penicillium	s__unidentified_Penicillium	New.CleanUp.ReferenceOTU4260
OTU1278	0	0	0	0	0	0	0	0	0	0	0	0	1	0	0	0	0	0	0	0	0	0	0	0	0	0	0	0	0	0	0	0	1	0	0	0	k__Fungi	p__Ascomycota	c__Eurotiomycetes	o__Eurotiales	f__Trichocomaceae	g__Penicillium	s__unidentified_Penicillium	New.CleanUp.ReferenceOTU4449
OTU1290	0	0	0	0	0	0	0	0	0	0	0	0	0	0	0	0	0	0	0	0	0	0	0	0	0	0	0	0	0	0	0	0	0	1	1	0	k__Fungi	p__Ascomycota	c__Eurotiomycetes	o__Eurotiales	f__Trichocomaceae	g__Penicillium	s__unidentified_Penicillium	New.CleanUp.ReferenceOTU7959
OTU1311	0	0	0	0	0	0	0	0	0	0	0	0	0	0	0	0	0	0	0	0	0	0	0	0	0	0	1	0	0	1	0	0	0	0	0	0	k__Fungi	p__Ascomycota	c__Eurotiomycetes	o__Eurotiales	f__Trichocomaceae	g__Penicillium	s__unidentified_Penicillium	New.CleanUp.ReferenceOTU16822
OTU1313	0	0	0	0	0	0	1	0	0	0	0	0	0	0	0	0	0	1	0	0	0	0	0	0	0	0	0	0	0	0	0	0	0	0	0	0	k__Fungi	p__Ascomycota	c__Eurotiomycetes	o__Eurotiales	f__Trichocomaceae	g__Penicillium	s__unidentified_Penicillium	New.CleanUp.ReferenceOTU17223
OTU1330	0	0	0	0	0	0	0	0	0	0	0	0	0	0	0	0	0	0	0	0	0	0	0	0	0	1	0	0	1	0	0	0	0	0	0	0	k__Fungi	p__Ascomycota	c__Eurotiomycetes	o__Eurotiales	f__Trichocomaceae	g__Penicillium	s__unidentified_Penicillium	New.CleanUp.ReferenceOTU23208
OTU1339	0	0	0	0	0	0	0	1	0	0	0	0	0	0	0	0	0	0	0	0	0	0	0	0	0	0	0	0	0	0	0	0	0	0	0	1	k__Fungi	p__Ascomycota	c__Eurotiomycetes	o__Eurotiales	f__Trichocomaceae	g__Penicillium	s__unidentified_Penicillium	New.CleanUp.ReferenceOTU25608
OTU1345	0	0	0	0	0	0	0	0	0	0	0	0	0	0	0	0	0	0	0	0	0	0	0	0	0	0	0	0	0	0	1	1	0	0	0	0	k__Fungi	p__Ascomycota	c__Eurotiomycetes	o__Eurotiales	f__Trichocomaceae	g__Penicillium	s__unidentified_Penicillium	New.CleanUp.ReferenceOTU27302
OTU1351	0	0	0	0	0	0	0	0	0	0	0	0	0	0	0	0	0	1	0	0	0	0	0	0	1	0	0	0	0	0	0	0	0	0	0	0	k__Fungi	p__Ascomycota	c__Eurotiomycetes	o__Eurotiales	f__Trichocomaceae	g__Penicillium	s__unidentified_Penicillium	New.CleanUp.ReferenceOTU29686
OTU1352	0	0	0	0	0	1	0	0	0	0	0	0	0	0	0	0	0	0	0	0	0	0	0	0	0	0	0	0	0	0	0	0	1	0	0	0	k__Fungi	p__Ascomycota	c__Eurotiomycetes	o__Eurotiales	f__Trichocomaceae	g__Penicillium	s__unidentified_Penicillium	New.CleanUp.ReferenceOTU29800
OTU1378	0	0	0	0	0	0	0	0	0	0	0	0	0	0	0	0	0	0	0	0	0	0	0	0	0	0	0	2	0	0	0	0	0	0	0	0	k__Fungi	p__Ascomycota	c__Eurotiomycetes	o__Eurotiales	f__Trichocomaceae	g__Penicillium	s__unidentified_Penicillium	New.CleanUp.ReferenceOTU40696
OTU1388	0	0	0	0	0	0	0	0	0	0	0	0	0	0	0	0	0	0	0	0	0	0	0	0	0	0	0	0	1	0	1	0	0	0	0	0	k__Fungi	p__Ascomycota	c__Eurotiomycetes	o__Eurotiales	f__Trichocomaceae	g__Penicillium	s__unidentified_Penicillium	New.CleanUp.ReferenceOTU44745
OTU1396	0	0	0	0	0	0	0	0	0	0	0	0	0	0	0	0	0	0	0	0	0	0	0	0	0	0	0	1	1	0	0	0	0	0	0	0	k__Fungi	p__Ascomycota	c__Eurotiomycetes	o__Eurotiales	f__Trichocomaceae	g__Penicillium	s__unidentified_Penicillium	New.CleanUp.ReferenceOTU48353
OTU1402	0	0	0	0	0	0	0	0	0	0	0	0	0	0	0	0	0	0	0	0	0	0	0	0	0	0	1	1	0	0	0	0	0	0	0	0	k__Fungi	p__Ascomycota	c__Eurotiomycetes	o__Eurotiales	f__Trichocomaceae	g__Penicillium	s__unidentified_Penicillium	New.CleanUp.ReferenceOTU50028
OTU1417	0	0	0	0	0	0	0	0	0	0	0	0	0	0	0	0	0	0	0	0	0	0	0	0	0	0	0	1	0	0	1	0	0	0	0	0	k__Fungi	p__Ascomycota	c__Eurotiomycetes	o__Eurotiales	f__Trichocomaceae	g__Penicillium	s__unidentified_Penicillium	New.CleanUp.ReferenceOTU55160
OTU1419	0	0	0	0	0	0	0	0	0	0	0	0	0	0	0	0	0	0	0	0	0	0	0	0	0	0	0	2	0	0	0	0	0	0	0	0	k__Fungi	p__Ascomycota	c__Eurotiomycetes	o__Eurotiales	f__Trichocomaceae	g__Penicillium	s__unidentified_Penicillium	New.CleanUp.ReferenceOTU55310
OTU1423	0	0	0	0	0	0	0	0	0	0	0	0	0	0	0	0	0	1	0	0	0	0	0	0	0	0	0	0	0	0	0	0	0	0	1	0	k__Fungi	p__Ascomycota	c__Eurotiomycetes	o__Eurotiales	f__Trichocomaceae	g__Penicillium	s__unidentified_Penicillium	New.CleanUp.ReferenceOTU57098
OTU1425	0	0	0	0	0	0	0	0	0	0	0	0	0	0	0	0	0	0	0	0	0	0	0	0	0	1	0	0	1	0	0	0	0	0	0	0	k__Fungi	p__Ascomycota	c__Eurotiomycetes	o__Eurotiales	f__Trichocomaceae	g__Penicillium	s__unidentified_Penicillium	New.CleanUp.ReferenceOTU57691
OTU1428	0	0	0	0	0	0	0	0	0	0	0	0	1	0	0	0	0	0	0	0	0	0	0	0	0	0	0	0	0	0	0	1	0	0	0	0	k__Fungi	p__Ascomycota	c__Eurotiomycetes	o__Eurotiales	f__Trichocomaceae	g__Penicillium	s__unidentified_Penicillium	New.CleanUp.ReferenceOTU58305
OTU1429	0	0	0	0	0	0	0	0	0	0	0	0	0	0	0	0	0	0	0	0	0	0	0	0	0	0	0	0	1	1	0	0	0	0	0	0	k__Fungi	p__Ascomycota	c__Eurotiomycetes	o__Eurotiales	f__Trichocomaceae	g__Penicillium	s__unidentified_Penicillium	New.CleanUp.ReferenceOTU58473
OTU1431	0	0	0	0	0	0	0	0	0	0	0	0	0	0	0	0	0	1	0	0	0	0	0	0	0	1	0	0	0	0	0	0	0	0	0	0	k__Fungi	p__Ascomycota	c__Eurotiomycetes	o__Eurotiales	f__Trichocomaceae	g__Penicillium	s__unidentified_Penicillium	New.CleanUp.ReferenceOTU58764
OTU1434	0	0	0	1	0	0	1	0	0	0	0	0	0	0	0	0	0	0	0	0	0	0	0	0	0	0	0	0	0	0	0	0	0	0	0	0	k__Fungi	p__Ascomycota	c__Eurotiomycetes	o__Eurotiales	f__Trichocomaceae	g__Penicillium	s__unidentified_Penicillium	New.CleanUp.ReferenceOTU59595
OTU1436	0	0	0	0	0	0	0	0	0	0	0	0	0	0	0	0	0	0	0	0	0	0	1	0	0	0	1	0	0	0	0	0	0	0	0	0	k__Fungi	p__Ascomycota	c__Eurotiomycetes	o__Eurotiales	f__Trichocomaceae	g__Penicillium	s__unidentified_Penicillium	New.CleanUp.ReferenceOTU61148
OTU1438	0	0	0	0	0	0	0	0	0	0	0	0	0	0	0	0	0	0	0	0	0	0	0	0	0	0	1	0	1	0	0	0	0	0	0	0	k__Fungi	p__Ascomycota	c__Eurotiomycetes	o__Eurotiales	f__Trichocomaceae	g__Penicillium	s__unidentified_Penicillium	New.CleanUp.ReferenceOTU61544
OTU1439	0	0	0	0	0	0	0	0	0	0	0	0	0	0	0	0	0	0	0	0	0	0	0	0	0	0	0	2	0	0	0	0	0	0	0	0	k__Fungi	p__Ascomycota	c__Eurotiomycetes	o__Eurotiales	f__Trichocomaceae	g__Penicillium	s__unidentified_Penicillium	New.CleanUp.ReferenceOTU61815
OTU1440	0	0	0	0	0	0	0	0	0	0	0	0	0	0	0	0	0	1	0	0	0	0	0	0	0	1	0	0	0	0	0	0	0	0	0	0	k__Fungi	p__Ascomycota	c__Eurotiomycetes	o__Eurotiales	f__Trichocomaceae	g__Penicillium	s__unidentified_Penicillium	New.CleanUp.ReferenceOTU61935
OTU1446	0	0	0	0	0	0	0	0	0	0	0	0	0	0	0	0	0	0	0	0	0	0	0	0	0	0	0	0	1	0	1	0	0	0	0	0	k__Fungi	p__Ascomycota	c__Eurotiomycetes	o__Eurotiales	f__Trichocomaceae	g__Penicillium	s__unidentified_Penicillium	New.CleanUp.ReferenceOTU63714
OTU1447	0	0	0	0	0	0	0	0	0	0	0	0	0	0	0	0	0	0	0	0	0	0	0	0	0	2	0	0	0	0	0	0	0	0	0	0	k__Fungi	p__Ascomycota	c__Eurotiomycetes	o__Eurotiales	f__Trichocomaceae	g__Penicillium	s__unidentified_Penicillium	New.CleanUp.ReferenceOTU63794
OTU1448	0	0	0	0	1	0	0	0	0	0	0	0	0	0	0	0	0	0	0	0	0	0	0	0	0	0	0	0	0	0	0	0	0	0	1	0	k__Fungi	p__Ascomycota	c__Eurotiomycetes	o__Eurotiales	f__Trichocomaceae	g__Penicillium	s__unidentified_Penicillium	New.CleanUp.ReferenceOTU63821
OTU1451	0	0	0	0	0	0	0	0	0	0	0	0	0	0	0	0	0	0	0	0	0	0	0	0	0	0	0	1	0	0	0	1	0	0	0	0	k__Fungi	p__Ascomycota	c__Eurotiomycetes	o__Eurotiales	f__Trichocomaceae	g__Penicillium	s__unidentified_Penicillium	New.CleanUp.ReferenceOTU64261
OTU1458	0	0	0	0	0	0	0	0	0	0	2	0	0	0	0	0	0	0	0	0	0	0	0	0	0	0	0	0	0	0	0	0	0	0	0	0	k__Fungi	p__Ascomycota	c__Eurotiomycetes	o__Eurotiales	f__Trichocomaceae	g__Penicillium	s__unidentified_Penicillium	New.CleanUp.ReferenceOTU66970
OTU1463	0	0	0	0	0	0	1	0	0	0	0	0	0	0	0	0	0	0	0	0	0	0	0	0	0	1	0	0	0	0	0	0	0	0	0	0	k__Fungi	p__Ascomycota	c__Eurotiomycetes	o__Eurotiales	f__Trichocomaceae	g__Penicillium	s__unidentified_Penicillium	New.CleanUp.ReferenceOTU68175
OTU1469	0	0	0	0	0	0	0	0	0	0	0	0	0	0	0	0	0	0	0	0	0	0	0	0	0	0	0	0	0	0	0	1	0	0	1	0	k__Fungi	p__Ascomycota	c__Eurotiomycetes	o__Eurotiales	f__Trichocomaceae	g__Penicillium	s__unidentified_Penicillium	New.CleanUp.ReferenceOTU70185
OTU1471	0	0	0	0	0	0	0	0	0	0	0	0	0	0	0	0	0	0	0	0	0	0	0	0	0	1	0	1	0	0	0	0	0	0	0	0	k__Fungi	p__Ascomycota	c__Eurotiomycetes	o__Eurotiales	f__Trichocomaceae	g__Penicillium	s__unidentified_Penicillium	New.CleanUp.ReferenceOTU70201
OTU1505	0	0	0	0	0	0	0	0	0	0	0	0	0	0	0	0	0	0	0	0	0	0	0	0	0	0	0	0	0	0	1	1	0	0	0	0	k__Fungi	p__Ascomycota	c__Eurotiomycetes	o__Eurotiales	f__Trichocomaceae	g__Penicillium	s__unidentified_Penicillium	New.CleanUp.ReferenceOTU78284
OTU1510	0	0	0	0	0	0	0	0	0	0	0	0	0	0	0	0	0	0	0	0	0	0	0	0	0	0	0	0	0	0	0	0	2	0	0	0	k__Fungi	p__Ascomycota	c__Eurotiomycetes	o__Eurotiales	f__Trichocomaceae	g__Penicillium	s__unidentified_Penicillium	New.CleanUp.ReferenceOTU79401
OTU1512	0	0	0	0	0	0	0	0	0	0	0	0	0	0	0	0	0	0	0	0	0	0	0	0	0	0	0	1	0	0	1	0	0	0	0	0	k__Fungi	p__Ascomycota	c__Eurotiomycetes	o__Eurotiales	f__Trichocomaceae	g__Penicillium	s__unidentified_Penicillium	New.CleanUp.ReferenceOTU79980
OTU1514	0	0	0	0	0	0	0	0	0	0	0	0	0	0	0	0	0	0	0	0	0	0	0	0	0	1	0	0	1	0	0	0	0	0	0	0	k__Fungi	p__Ascomycota	c__Eurotiomycetes	o__Eurotiales	f__Trichocomaceae	g__Penicillium	s__unidentified_Penicillium	New.CleanUp.ReferenceOTU80830
OTU1519	0	0	0	0	0	0	0	0	0	0	0	0	0	0	0	0	0	0	0	0	0	0	0	0	0	0	0	0	1	0	1	0	0	0	0	0	k__Fungi	p__Ascomycota	c__Eurotiomycetes	o__Eurotiales	f__Trichocomaceae	g__Penicillium	s__unidentified_Penicillium	New.CleanUp.ReferenceOTU81983
OTU1522	0	0	0	0	0	0	0	0	0	0	0	0	0	0	0	0	0	0	0	0	0	0	0	0	1	0	0	0	0	1	0	0	0	0	0	0	k__Fungi	p__Ascomycota	c__Eurotiomycetes	o__Eurotiales	f__Trichocomaceae	g__Penicillium	s__unidentified_Penicillium	New.CleanUp.ReferenceOTU82915
OTU1528	0	0	0	0	0	0	0	0	0	0	0	0	0	0	0	0	0	1	0	0	0	0	0	0	0	0	0	0	0	0	1	0	0	0	0	0	k__Fungi	p__Ascomycota	c__Eurotiomycetes	o__Eurotiales	f__Trichocomaceae	g__Penicillium	s__unidentified_Penicillium	New.CleanUp.ReferenceOTU83738
OTU1545	0	0	0	0	0	0	0	0	0	0	0	0	0	0	0	0	0	1	0	0	0	0	0	0	0	0	0	0	1	0	0	0	0	0	0	0	k__Fungi	p__Ascomycota	c__Eurotiomycetes	o__Eurotiales	f__Trichocomaceae	g__Penicillium	s__unidentified_Penicillium	New.CleanUp.ReferenceOTU91515
OTU1550	0	0	0	0	0	0	0	0	0	0	0	0	0	0	0	0	0	0	0	0	0	0	0	0	0	0	0	0	0	0	0	0	0	0	2	0	k__Fungi	p__Ascomycota	c__Eurotiomycetes	o__Eurotiales	f__Trichocomaceae	g__Penicillium	s__unidentified_Penicillium	New.CleanUp.ReferenceOTU92425
OTU1551	0	0	0	0	0	0	0	0	0	0	0	0	0	0	0	0	0	0	0	0	0	0	0	0	0	1	0	1	0	0	0	0	0	0	0	0	k__Fungi	p__Ascomycota	c__Eurotiomycetes	o__Eurotiales	f__Trichocomaceae	g__Penicillium	s__unidentified_Penicillium	New.CleanUp.ReferenceOTU92936
OTU1562	0	0	0	0	0	0	0	0	0	0	0	0	0	0	0	0	0	0	0	0	0	0	0	0	0	0	0	0	0	2	0	0	0	0	0	0	k__Fungi	p__Ascomycota	c__Eurotiomycetes	o__Eurotiales	f__Trichocomaceae	g__Penicillium	s__unidentified_Penicillium	New.CleanUp.ReferenceOTU96699
OTU1565	0	0	0	0	0	0	0	0	0	0	0	0	0	0	0	0	0	0	0	0	0	0	0	0	0	0	0	0	0	0	0	0	1	0	0	1	k__Fungi	p__Ascomycota	c__Eurotiomycetes	o__Eurotiales	f__Trichocomaceae	g__Penicillium	s__unidentified_Penicillium	New.CleanUp.ReferenceOTU96917
OTU1580	0	0	0	0	0	0	0	0	0	0	0	0	0	0	0	0	0	0	0	0	0	0	0	0	0	1	0	1	0	0	0	0	0	0	0	0	k__Fungi	p__Ascomycota	c__Eurotiomycetes	o__Eurotiales	f__Trichocomaceae	g__Penicillium	s__unidentified_Penicillium	New.CleanUp.ReferenceOTU101826
OTU1587	0	0	0	0	0	0	0	0	0	0	0	0	0	0	0	0	0	0	0	0	0	0	0	0	0	0	0	0	2	0	0	0	0	0	0	0	k__Fungi	p__Ascomycota	c__Eurotiomycetes	o__Eurotiales	f__Trichocomaceae	g__Penicillium	s__unidentified_Penicillium	New.CleanUp.ReferenceOTU104537
OTU1590	0	0	0	0	0	0	0	0	0	0	0	0	0	0	0	0	0	0	0	0	0	0	0	0	0	0	0	2	0	0	0	0	0	0	0	0	k__Fungi	p__Ascomycota	c__Eurotiomycetes	o__Eurotiales	f__Trichocomaceae	g__Penicillium	s__unidentified_Penicillium	New.CleanUp.ReferenceOTU105042
OTU1596	0	0	0	0	0	0	0	0	0	0	0	0	0	0	0	0	0	0	0	0	0	0	0	0	0	1	0	0	0	0	1	0	0	0	0	0	k__Fungi	p__Ascomycota	c__Eurotiomycetes	o__Eurotiales	f__Trichocomaceae	g__Penicillium	s__unidentified_Penicillium	New.CleanUp.ReferenceOTU108425
OTU1605	0	0	0	0	0	0	0	0	0	0	0	0	0	0	0	0	0	0	0	0	0	0	0	0	0	0	0	2	0	0	0	0	0	0	0	0	k__Fungi	p__Ascomycota	c__Eurotiomycetes	o__Eurotiales	f__Trichocomaceae	g__Penicillium	s__unidentified_Penicillium	New.CleanUp.ReferenceOTU109973
OTU1620	0	0	0	0	0	0	0	0	0	0	0	0	0	0	0	0	0	0	0	0	0	0	0	0	0	0	1	0	0	1	0	0	0	0	0	0	k__Fungi	p__Ascomycota	c__Eurotiomycetes	o__Eurotiales	f__Trichocomaceae	g__Penicillium	s__unidentified_Penicillium	New.CleanUp.ReferenceOTU114302
OTU1624	0	0	0	0	0	0	0	0	0	0	0	0	0	0	0	0	0	0	0	0	0	0	0	0	0	1	0	0	0	0	1	0	0	0	0	0	k__Fungi	p__Ascomycota	c__Eurotiomycetes	o__Eurotiales	f__Trichocomaceae	g__Penicillium	s__unidentified_Penicillium	New.CleanUp.ReferenceOTU116078
OTU1625	0	0	0	0	0	0	0	0	0	0	0	0	0	0	0	0	0	0	0	0	0	0	0	0	0	1	1	0	0	0	0	0	0	0	0	0	k__Fungi	p__Ascomycota	c__Eurotiomycetes	o__Eurotiales	f__Trichocomaceae	g__Penicillium	s__unidentified_Penicillium	New.CleanUp.ReferenceOTU116128
OTU1632	0	0	0	0	0	0	0	0	0	0	0	0	0	0	0	0	0	1	0	0	0	0	0	0	1	0	0	0	0	0	0	0	0	0	0	0	k__Fungi	p__Ascomycota	c__Eurotiomycetes	o__Eurotiales	f__Trichocomaceae	g__Penicillium	s__unidentified_Penicillium	New.CleanUp.ReferenceOTU119415
OTU2478	0	0	0	2	0	0	0	0	0	0	0	0	0	0	0	0	0	0	0	0	0	0	0	0	0	0	0	0	0	0	0	0	0	0	0	0	k__Fungi	p__Ascomycota	c__Eurotiomycetes	o__Eurotiales	f__Trichocomaceae	g__Penicillium	s__unidentified_Penicillium	New.CleanUp.ReferenceOTU5137
OTU2483	0	0	0	0	0	0	0	0	0	0	0	0	0	0	0	0	0	0	0	0	0	0	0	0	1	0	0	1	0	0	0	0	0	0	0	0	k__Fungi	p__Ascomycota	c__Eurotiomycetes	o__Eurotiales	f__Trichocomaceae	g__Penicillium	s__unidentified_Penicillium	New.CleanUp.ReferenceOTU8622
OTU2521	0	0	0	0	0	0	0	0	0	0	0	0	0	0	0	0	0	0	0	0	0	0	0	0	0	1	0	0	0	0	1	0	0	0	0	0	k__Fungi	p__Ascomycota	c__Eurotiomycetes	o__Eurotiales	f__Trichocomaceae	g__Penicillium	s__unidentified_Penicillium	New.CleanUp.ReferenceOTU30726
OTU2551	0	0	0	0	0	0	0	0	0	0	0	0	0	0	0	0	0	0	0	0	0	0	0	0	0	2	0	0	0	0	0	0	0	0	0	0	k__Fungi	p__Ascomycota	c__Eurotiomycetes	o__Eurotiales	f__Trichocomaceae	g__Penicillium	s__unidentified_Penicillium	New.CleanUp.ReferenceOTU53910
OTU2612	0	0	0	0	0	0	0	0	0	0	0	0	0	0	0	0	0	0	0	0	0	0	0	0	0	0	0	1	1	0	0	0	0	0	0	0	k__Fungi	p__Ascomycota	c__Eurotiomycetes	o__Eurotiales	f__Trichocomaceae	g__Penicillium	s__unidentified_Penicillium	New.CleanUp.ReferenceOTU97376
OTU2627	0	0	0	0	0	0	0	0	0	0	0	0	0	0	0	0	0	0	0	0	0	0	0	0	0	1	0	0	0	0	1	0	0	0	0	0	k__Fungi	p__Ascomycota	c__Eurotiomycetes	o__Eurotiales	f__Trichocomaceae	g__Penicillium	s__unidentified_Penicillium	New.CleanUp.ReferenceOTU110599
OTU3017	0	0	0	0	0	0	0	0	0	0	0	0	0	0	0	0	0	0	0	0	0	0	0	0	1	0	0	1	0	0	0	0	0	0	0	0	k__Fungi	p__Ascomycota	c__Eurotiomycetes	o__Eurotiales	f__Trichocomaceae	g__Penicillium	s__unidentified_Penicillium	New.CleanUp.ReferenceOTU6541
OTU3045	0	0	0	0	0	0	0	0	0	0	0	0	0	0	0	0	0	0	0	0	0	0	0	0	0	0	0	0	0	0	2	0	0	0	0	0	k__Fungi	p__Ascomycota	c__Eurotiomycetes	o__Eurotiales	f__Trichocomaceae	g__Penicillium	s__unidentified_Penicillium	New.CleanUp.ReferenceOTU32434
OTU3058	0	0	0	0	0	0	0	0	0	0	0	0	0	0	0	0	0	0	0	0	0	0	0	0	0	0	0	2	0	0	0	0	0	0	0	0	k__Fungi	p__Ascomycota	c__Eurotiomycetes	o__Eurotiales	f__Trichocomaceae	g__Penicillium	s__unidentified_Penicillium	New.CleanUp.ReferenceOTU44906
OTU3091	0	0	0	0	0	0	0	0	0	0	0	0	0	0	0	0	0	0	0	0	0	0	0	0	0	0	0	2	0	0	0	0	0	0	0	0	k__Fungi	p__Ascomycota	c__Eurotiomycetes	o__Eurotiales	f__Trichocomaceae	g__Penicillium	s__unidentified_Penicillium	New.CleanUp.ReferenceOTU79283
OTU3423	0	0	0	0	0	0	0	0	0	0	0	0	0	0	0	0	0	0	0	0	0	0	0	0	0	0	0	0	1	1	0	0	0	0	0	0	k__Fungi	p__Ascomycota	c__Eurotiomycetes	o__Eurotiales	f__Trichocomaceae	g__Penicillium	s__unidentified_Penicillium	New.CleanUp.ReferenceOTU92279
OTU136	0	0	0	0	0	0	0	0	0	0	0	0	0	0	0	0	0	0	0	0	0	0	0	0	0	1	0	0	0	0	0	0	0	0	0	0	k__Fungi	p__Ascomycota	c__Eurotiomycetes	o__Eurotiales	f__Trichocomaceae	g__Penicillium	s__unidentified_Penicillium	New.CleanUp.ReferenceOTU339
OTU137	0	0	0	0	1	0	0	0	0	0	0	0	0	0	0	0	0	0	0	0	0	0	0	0	0	0	0	0	0	0	0	0	0	0	0	0	k__Fungi	p__Ascomycota	c__Eurotiomycetes	o__Eurotiales	f__Trichocomaceae	g__Penicillium	s__unidentified_Penicillium	New.CleanUp.ReferenceOTU676
OTU147	0	0	0	0	0	0	0	0	0	0	0	0	0	0	0	0	0	0	0	0	0	0	0	0	0	0	0	0	0	0	0	1	0	0	0	0	k__Fungi	p__Ascomycota	c__Eurotiomycetes	o__Eurotiales	f__Trichocomaceae	g__Penicillium	s__unidentified_Penicillium	New.CleanUp.ReferenceOTU2943
OTU152	0	0	0	0	0	0	0	0	0	0	0	0	0	0	0	0	0	0	0	0	0	0	0	0	0	0	0	0	1	0	0	0	0	0	0	0	k__Fungi	p__Ascomycota	c__Eurotiomycetes	o__Eurotiales	f__Trichocomaceae	g__Penicillium	s__unidentified_Penicillium	New.CleanUp.ReferenceOTU4058
OTU161	0	0	0	0	0	0	0	0	0	0	0	0	0	0	0	0	0	0	0	0	0	0	0	0	0	0	0	1	0	0	0	0	0	0	0	0	k__Fungi	p__Ascomycota	c__Eurotiomycetes	o__Eurotiales	f__Trichocomaceae	g__Penicillium	s__unidentified_Penicillium	New.CleanUp.ReferenceOTU6116
OTU167	0	0	0	0	0	0	0	0	0	0	0	0	0	0	0	0	0	0	0	0	0	0	0	0	1	0	0	0	0	0	0	0	0	0	0	0	k__Fungi	p__Ascomycota	c__Eurotiomycetes	o__Eurotiales	f__Trichocomaceae	g__Penicillium	s__unidentified_Penicillium	New.CleanUp.ReferenceOTU7680
OTU176	0	0	0	0	0	0	0	0	0	0	0	0	0	0	0	0	0	1	0	0	0	0	0	0	0	0	0	0	0	0	0	0	0	0	0	0	k__Fungi	p__Ascomycota	c__Eurotiomycetes	o__Eurotiales	f__Trichocomaceae	g__Penicillium	s__unidentified_Penicillium	New.CleanUp.ReferenceOTU10699
OTU177	0	0	0	0	0	0	0	0	0	0	0	0	0	0	0	0	0	0	0	0	0	0	0	0	0	1	0	0	0	0	0	0	0	0	0	0	k__Fungi	p__Ascomycota	c__Eurotiomycetes	o__Eurotiales	f__Trichocomaceae	g__Penicillium	s__unidentified_Penicillium	New.CleanUp.ReferenceOTU10704
OTU178	0	0	0	0	0	0	0	0	0	0	0	0	0	0	0	0	0	0	0	0	0	0	0	0	1	0	0	0	0	0	0	0	0	0	0	0	k__Fungi	p__Ascomycota	c__Eurotiomycetes	o__Eurotiales	f__Trichocomaceae	g__Penicillium	s__unidentified_Penicillium	New.CleanUp.ReferenceOTU10775
OTU188	0	0	0	0	0	0	0	0	0	0	0	0	0	0	0	0	0	0	0	0	0	0	0	0	0	0	1	0	0	0	0	0	0	0	0	0	k__Fungi	p__Ascomycota	c__Eurotiomycetes	o__Eurotiales	f__Trichocomaceae	g__Penicillium	s__unidentified_Penicillium	New.CleanUp.ReferenceOTU13845
OTU192	0	0	0	0	0	0	0	0	0	0	0	0	0	0	0	0	0	0	0	0	0	0	0	0	0	0	1	0	0	0	0	0	0	0	0	0	k__Fungi	p__Ascomycota	c__Eurotiomycetes	o__Eurotiales	f__Trichocomaceae	g__Penicillium	s__unidentified_Penicillium	New.CleanUp.ReferenceOTU14895
OTU200	0	0	0	0	0	0	0	0	0	0	0	0	0	0	0	0	0	0	0	0	0	0	0	0	0	0	0	1	0	0	0	0	0	0	0	0	k__Fungi	p__Ascomycota	c__Eurotiomycetes	o__Eurotiales	f__Trichocomaceae	g__Penicillium	s__unidentified_Penicillium	New.CleanUp.ReferenceOTU18142
OTU203	0	0	0	0	0	0	0	0	0	0	0	0	0	0	0	0	0	0	0	0	0	0	0	0	0	0	0	0	0	0	0	1	0	0	0	0	k__Fungi	p__Ascomycota	c__Eurotiomycetes	o__Eurotiales	f__Trichocomaceae	g__Penicillium	s__unidentified_Penicillium	New.CleanUp.ReferenceOTU19572
OTU210	0	0	0	1	0	0	0	0	0	0	0	0	0	0	0	0	0	0	0	0	0	0	0	0	0	0	0	0	0	0	0	0	0	0	0	0	k__Fungi	p__Ascomycota	c__Eurotiomycetes	o__Eurotiales	f__Trichocomaceae	g__Penicillium	s__unidentified_Penicillium	New.CleanUp.ReferenceOTU21193
OTU213	0	0	0	0	0	1	0	0	0	0	0	0	0	0	0	0	0	0	0	0	0	0	0	0	0	0	0	0	0	0	0	0	0	0	0	0	k__Fungi	p__Ascomycota	c__Eurotiomycetes	o__Eurotiales	f__Trichocomaceae	g__Penicillium	s__unidentified_Penicillium	New.CleanUp.ReferenceOTU22091
OTU218	0	0	0	0	0	0	0	0	0	0	0	0	0	0	0	0	0	1	0	0	0	0	0	0	0	0	0	0	0	0	0	0	0	0	0	0	k__Fungi	p__Ascomycota	c__Eurotiomycetes	o__Eurotiales	f__Trichocomaceae	g__Penicillium	s__unidentified_Penicillium	New.CleanUp.ReferenceOTU23001
OTU219	0	0	0	1	0	0	0	0	0	0	0	0	0	0	0	0	0	0	0	0	0	0	0	0	0	0	0	0	0	0	0	0	0	0	0	0	k__Fungi	p__Ascomycota	c__Eurotiomycetes	o__Eurotiales	f__Trichocomaceae	g__Penicillium	s__unidentified_Penicillium	New.CleanUp.ReferenceOTU23226
OTU227	0	0	0	0	0	0	0	0	0	0	0	0	0	0	0	0	0	0	0	0	0	0	0	0	0	0	0	1	0	0	0	0	0	0	0	0	k__Fungi	p__Ascomycota	c__Eurotiomycetes	o__Eurotiales	f__Trichocomaceae	g__Penicillium	s__unidentified_Penicillium	New.CleanUp.ReferenceOTU24804
OTU228	0	0	0	0	0	0	0	0	0	0	0	0	0	0	0	0	0	0	0	0	1	0	0	0	0	0	0	0	0	0	0	0	0	0	0	0	k__Fungi	p__Ascomycota	c__Eurotiomycetes	o__Eurotiales	f__Trichocomaceae	g__Penicillium	s__unidentified_Penicillium	New.CleanUp.ReferenceOTU24934
OTU231	0	0	0	0	0	0	0	0	0	0	0	0	0	0	0	0	0	0	0	0	0	0	0	0	0	0	0	1	0	0	0	0	0	0	0	0	k__Fungi	p__Ascomycota	c__Eurotiomycetes	o__Eurotiales	f__Trichocomaceae	g__Penicillium	s__unidentified_Penicillium	New.CleanUp.ReferenceOTU26270
OTU232	0	0	0	0	0	0	0	0	0	0	0	0	0	0	0	0	0	0	0	0	0	0	0	0	0	0	0	0	0	0	0	1	0	0	0	0	k__Fungi	p__Ascomycota	c__Eurotiomycetes	o__Eurotiales	f__Trichocomaceae	g__Penicillium	s__unidentified_Penicillium	New.CleanUp.ReferenceOTU27121
OTU233	0	0	0	0	0	0	0	0	0	0	0	0	0	0	0	0	0	0	0	0	0	0	0	0	0	0	0	0	0	0	1	0	0	0	0	0	k__Fungi	p__Ascomycota	c__Eurotiomycetes	o__Eurotiales	f__Trichocomaceae	g__Penicillium	s__unidentified_Penicillium	New.CleanUp.ReferenceOTU27965
OTU236	0	0	0	0	0	0	0	0	0	0	0	0	0	0	0	0	0	0	0	0	0	0	0	0	0	0	0	0	0	1	0	0	0	0	0	0	k__Fungi	p__Ascomycota	c__Eurotiomycetes	o__Eurotiales	f__Trichocomaceae	g__Penicillium	s__unidentified_Penicillium	New.CleanUp.ReferenceOTU29552
OTU237	0	0	0	0	0	0	0	0	0	0	0	0	0	0	0	0	0	0	0	0	0	0	0	0	0	1	0	0	0	0	0	0	0	0	0	0	k__Fungi	p__Ascomycota	c__Eurotiomycetes	o__Eurotiales	f__Trichocomaceae	g__Penicillium	s__unidentified_Penicillium	New.CleanUp.ReferenceOTU29573
OTU240	0	0	0	0	0	0	0	0	0	0	0	0	0	0	0	0	0	0	0	0	0	0	0	0	0	1	0	0	0	0	0	0	0	0	0	0	k__Fungi	p__Ascomycota	c__Eurotiomycetes	o__Eurotiales	f__Trichocomaceae	g__Penicillium	s__unidentified_Penicillium	New.CleanUp.ReferenceOTU29900
OTU246	0	0	0	0	0	0	0	0	0	0	0	0	0	0	0	0	0	0	0	0	0	0	0	0	0	0	0	1	0	0	0	0	0	0	0	0	k__Fungi	p__Ascomycota	c__Eurotiomycetes	o__Eurotiales	f__Trichocomaceae	g__Penicillium	s__unidentified_Penicillium	New.CleanUp.ReferenceOTU32845
OTU258	0	0	0	0	0	0	0	0	0	0	0	0	0	0	0	0	0	0	0	0	0	0	0	0	0	0	1	0	0	0	0	0	0	0	0	0	k__Fungi	p__Ascomycota	c__Eurotiomycetes	o__Eurotiales	f__Trichocomaceae	g__Penicillium	s__unidentified_Penicillium	New.CleanUp.ReferenceOTU36203
OTU260	0	0	0	0	0	0	0	0	0	0	0	0	0	0	0	0	1	0	0	0	0	0	0	0	0	0	0	0	0	0	0	0	0	0	0	0	k__Fungi	p__Ascomycota	c__Eurotiomycetes	o__Eurotiales	f__Trichocomaceae	g__Penicillium	s__unidentified_Penicillium	New.CleanUp.ReferenceOTU36339
OTU266	0	0	0	1	0	0	0	0	0	0	0	0	0	0	0	0	0	0	0	0	0	0	0	0	0	0	0	0	0	0	0	0	0	0	0	0	k__Fungi	p__Ascomycota	c__Eurotiomycetes	o__Eurotiales	f__Trichocomaceae	g__Penicillium	s__unidentified_Penicillium	New.CleanUp.ReferenceOTU38289
OTU275	0	0	0	0	0	0	0	0	0	0	0	0	0	0	0	0	0	0	0	0	0	0	0	0	0	0	0	1	0	0	0	0	0	0	0	0	k__Fungi	p__Ascomycota	c__Eurotiomycetes	o__Eurotiales	f__Trichocomaceae	g__Penicillium	s__unidentified_Penicillium	New.CleanUp.ReferenceOTU43597
OTU276	0	0	0	0	0	0	0	0	0	0	0	0	0	0	0	0	0	0	0	0	0	0	0	0	0	1	0	0	0	0	0	0	0	0	0	0	k__Fungi	p__Ascomycota	c__Eurotiomycetes	o__Eurotiales	f__Trichocomaceae	g__Penicillium	s__unidentified_Penicillium	New.CleanUp.ReferenceOTU44073
OTU279	0	0	0	0	0	0	0	0	0	0	0	0	0	0	0	0	0	1	0	0	0	0	0	0	0	0	0	0	0	0	0	0	0	0	0	0	k__Fungi	p__Ascomycota	c__Eurotiomycetes	o__Eurotiales	f__Trichocomaceae	g__Penicillium	s__unidentified_Penicillium	New.CleanUp.ReferenceOTU44924
OTU293	0	0	0	0	0	0	0	0	0	0	0	0	0	0	1	0	0	0	0	0	0	0	0	0	0	0	0	0	0	0	0	0	0	0	0	0	k__Fungi	p__Ascomycota	c__Eurotiomycetes	o__Eurotiales	f__Trichocomaceae	g__Penicillium	s__unidentified_Penicillium	New.CleanUp.ReferenceOTU49716
OTU294	0	0	0	0	0	0	0	0	0	0	0	0	0	0	0	0	0	0	0	0	0	0	0	1	0	0	0	0	0	0	0	0	0	0	0	0	k__Fungi	p__Ascomycota	c__Eurotiomycetes	o__Eurotiales	f__Trichocomaceae	g__Penicillium	s__unidentified_Penicillium	New.CleanUp.ReferenceOTU50102
OTU299	0	0	0	0	0	0	0	0	0	0	0	0	0	0	0	0	0	0	0	0	0	0	0	0	0	0	0	0	0	0	0	1	0	0	0	0	k__Fungi	p__Ascomycota	c__Eurotiomycetes	o__Eurotiales	f__Trichocomaceae	g__Penicillium	s__unidentified_Penicillium	New.CleanUp.ReferenceOTU51089
OTU301	0	0	0	0	0	0	0	0	0	0	0	0	1	0	0	0	0	0	0	0	0	0	0	0	0	0	0	0	0	0	0	0	0	0	0	0	k__Fungi	p__Ascomycota	c__Eurotiomycetes	o__Eurotiales	f__Trichocomaceae	g__Penicillium	s__unidentified_Penicillium	New.CleanUp.ReferenceOTU51915
OTU303	0	0	0	0	0	0	0	0	0	0	0	0	0	0	0	0	0	0	0	0	0	0	0	0	0	0	0	0	0	0	0	0	0	0	1	0	k__Fungi	p__Ascomycota	c__Eurotiomycetes	o__Eurotiales	f__Trichocomaceae	g__Penicillium	s__unidentified_Penicillium	New.CleanUp.ReferenceOTU52572
OTU308	0	0	0	0	1	0	0	0	0	0	0	0	0	0	0	0	0	0	0	0	0	0	0	0	0	0	0	0	0	0	0	0	0	0	0	0	k__Fungi	p__Ascomycota	c__Eurotiomycetes	o__Eurotiales	f__Trichocomaceae	g__Penicillium	s__unidentified_Penicillium	New.CleanUp.ReferenceOTU54623
OTU310	0	0	0	0	0	0	0	0	0	1	0	0	0	0	0	0	0	0	0	0	0	0	0	0	0	0	0	0	0	0	0	0	0	0	0	0	k__Fungi	p__Ascomycota	c__Eurotiomycetes	o__Eurotiales	f__Trichocomaceae	g__Penicillium	s__unidentified_Penicillium	New.CleanUp.ReferenceOTU55179
OTU311	0	0	0	0	0	0	0	0	0	0	0	0	0	1	0	0	0	0	0	0	0	0	0	0	0	0	0	0	0	0	0	0	0	0	0	0	k__Fungi	p__Ascomycota	c__Eurotiomycetes	o__Eurotiales	f__Trichocomaceae	g__Penicillium	s__unidentified_Penicillium	New.CleanUp.ReferenceOTU55461
OTU319	0	0	0	0	0	0	0	0	0	0	0	0	0	0	0	0	0	1	0	0	0	0	0	0	0	0	0	0	0	0	0	0	0	0	0	0	k__Fungi	p__Ascomycota	c__Eurotiomycetes	o__Eurotiales	f__Trichocomaceae	g__Penicillium	s__unidentified_Penicillium	New.CleanUp.ReferenceOTU57687
OTU323	0	0	0	0	0	0	0	0	0	0	0	0	0	0	0	1	0	0	0	0	0	0	0	0	0	0	0	0	0	0	0	0	0	0	0	0	k__Fungi	p__Ascomycota	c__Eurotiomycetes	o__Eurotiales	f__Trichocomaceae	g__Penicillium	s__unidentified_Penicillium	New.CleanUp.ReferenceOTU58240
OTU325	1	0	0	0	0	0	0	0	0	0	0	0	0	0	0	0	0	0	0	0	0	0	0	0	0	0	0	0	0	0	0	0	0	0	0	0	k__Fungi	p__Ascomycota	c__Eurotiomycetes	o__Eurotiales	f__Trichocomaceae	g__Penicillium	s__unidentified_Penicillium	New.CleanUp.ReferenceOTU58921
OTU327	0	0	0	0	0	0	0	0	0	0	0	0	0	0	0	0	0	0	0	0	0	0	0	0	1	0	0	0	0	0	0	0	0	0	0	0	k__Fungi	p__Ascomycota	c__Eurotiomycetes	o__Eurotiales	f__Trichocomaceae	g__Penicillium	s__unidentified_Penicillium	New.CleanUp.ReferenceOTU59086
OTU345	0	0	0	0	0	0	0	0	0	0	0	0	0	0	0	0	0	0	0	0	0	0	0	0	0	0	0	1	0	0	0	0	0	0	0	0	k__Fungi	p__Ascomycota	c__Eurotiomycetes	o__Eurotiales	f__Trichocomaceae	g__Penicillium	s__unidentified_Penicillium	New.CleanUp.ReferenceOTU64464
OTU347	0	0	0	0	0	0	0	0	0	0	0	0	0	0	0	0	0	0	0	0	0	0	0	0	0	0	0	1	0	0	0	0	0	0	0	0	k__Fungi	p__Ascomycota	c__Eurotiomycetes	o__Eurotiales	f__Trichocomaceae	g__Penicillium	s__unidentified_Penicillium	New.CleanUp.ReferenceOTU65299
OTU357	0	0	0	0	0	0	0	0	0	0	0	0	0	1	0	0	0	0	0	0	0	0	0	0	0	0	0	0	0	0	0	0	0	0	0	0	k__Fungi	p__Ascomycota	c__Eurotiomycetes	o__Eurotiales	f__Trichocomaceae	g__Penicillium	s__unidentified_Penicillium	New.CleanUp.ReferenceOTU69096
OTU374	0	1	0	0	0	0	0	0	0	0	0	0	0	0	0	0	0	0	0	0	0	0	0	0	0	0	0	0	0	0	0	0	0	0	0	0	k__Fungi	p__Ascomycota	c__Eurotiomycetes	o__Eurotiales	f__Trichocomaceae	g__Penicillium	s__unidentified_Penicillium	New.CleanUp.ReferenceOTU73014
OTU378	1	0	0	0	0	0	0	0	0	0	0	0	0	0	0	0	0	0	0	0	0	0	0	0	0	0	0	0	0	0	0	0	0	0	0	0	k__Fungi	p__Ascomycota	c__Eurotiomycetes	o__Eurotiales	f__Trichocomaceae	g__Penicillium	s__unidentified_Penicillium	New.CleanUp.ReferenceOTU73897
OTU386	0	0	0	0	0	0	0	0	0	0	0	0	0	0	0	0	0	1	0	0	0	0	0	0	0	0	0	0	0	0	0	0	0	0	0	0	k__Fungi	p__Ascomycota	c__Eurotiomycetes	o__Eurotiales	f__Trichocomaceae	g__Penicillium	s__unidentified_Penicillium	New.CleanUp.ReferenceOTU76074
OTU388	0	0	0	0	0	0	0	0	0	0	0	0	0	0	0	0	0	0	0	0	0	0	0	0	0	1	0	0	0	0	0	0	0	0	0	0	k__Fungi	p__Ascomycota	c__Eurotiomycetes	o__Eurotiales	f__Trichocomaceae	g__Penicillium	s__unidentified_Penicillium	New.CleanUp.ReferenceOTU76156
OTU390	0	0	0	0	0	0	0	0	0	0	0	0	0	0	0	0	0	0	0	0	0	0	0	0	0	0	0	1	0	0	0	0	0	0	0	0	k__Fungi	p__Ascomycota	c__Eurotiomycetes	o__Eurotiales	f__Trichocomaceae	g__Penicillium	s__unidentified_Penicillium	New.CleanUp.ReferenceOTU76654
OTU392	0	0	0	0	0	0	0	0	0	0	0	0	0	0	0	0	0	0	0	0	0	0	0	0	0	0	0	0	0	0	0	0	0	1	0	0	k__Fungi	p__Ascomycota	c__Eurotiomycetes	o__Eurotiales	f__Trichocomaceae	g__Penicillium	s__unidentified_Penicillium	New.CleanUp.ReferenceOTU77708
OTU394	0	0	0	0	0	0	0	0	0	0	0	0	0	0	0	0	0	0	0	0	0	0	0	0	0	0	0	0	0	0	0	1	0	0	0	0	k__Fungi	p__Ascomycota	c__Eurotiomycetes	o__Eurotiales	f__Trichocomaceae	g__Penicillium	s__unidentified_Penicillium	New.CleanUp.ReferenceOTU78518
OTU396	0	0	0	0	0	0	0	0	0	0	1	0	0	0	0	0	0	0	0	0	0	0	0	0	0	0	0	0	0	0	0	0	0	0	0	0	k__Fungi	p__Ascomycota	c__Eurotiomycetes	o__Eurotiales	f__Trichocomaceae	g__Penicillium	s__unidentified_Penicillium	New.CleanUp.ReferenceOTU78885
OTU400	0	0	0	0	0	0	0	0	0	0	0	0	0	0	0	0	0	0	0	0	0	0	0	0	0	0	0	1	0	0	0	0	0	0	0	0	k__Fungi	p__Ascomycota	c__Eurotiomycetes	o__Eurotiales	f__Trichocomaceae	g__Penicillium	s__unidentified_Penicillium	New.CleanUp.ReferenceOTU79452
OTU408	1	0	0	0	0	0	0	0	0	0	0	0	0	0	0	0	0	0	0	0	0	0	0	0	0	0	0	0	0	0	0	0	0	0	0	0	k__Fungi	p__Ascomycota	c__Eurotiomycetes	o__Eurotiales	f__Trichocomaceae	g__Penicillium	s__unidentified_Penicillium	New.CleanUp.ReferenceOTU82520
OTU409	0	0	0	0	0	0	0	0	0	0	0	0	0	0	0	0	0	0	0	0	0	0	0	0	0	0	0	0	0	0	0	1	0	0	0	0	k__Fungi	p__Ascomycota	c__Eurotiomycetes	o__Eurotiales	f__Trichocomaceae	g__Penicillium	s__unidentified_Penicillium	New.CleanUp.ReferenceOTU82611
OTU416	0	0	0	0	0	0	0	0	0	0	0	0	1	0	0	0	0	0	0	0	0	0	0	0	0	0	0	0	0	0	0	0	0	0	0	0	k__Fungi	p__Ascomycota	c__Eurotiomycetes	o__Eurotiales	f__Trichocomaceae	g__Penicillium	s__unidentified_Penicillium	New.CleanUp.ReferenceOTU85015
OTU418	0	0	0	0	0	0	0	0	0	0	0	0	0	0	0	0	0	0	0	0	0	0	0	0	0	1	0	0	0	0	0	0	0	0	0	0	k__Fungi	p__Ascomycota	c__Eurotiomycetes	o__Eurotiales	f__Trichocomaceae	g__Penicillium	s__unidentified_Penicillium	New.CleanUp.ReferenceOTU85305
OTU419	0	0	0	0	0	0	0	0	0	0	0	0	0	0	0	0	0	0	0	0	0	0	0	0	0	0	0	0	0	0	0	0	0	1	0	0	k__Fungi	p__Ascomycota	c__Eurotiomycetes	o__Eurotiales	f__Trichocomaceae	g__Penicillium	s__unidentified_Penicillium	New.CleanUp.ReferenceOTU85610
OTU420	0	0	0	0	0	0	0	0	0	0	0	0	0	0	0	0	0	0	0	0	0	0	0	0	1	0	0	0	0	0	0	0	0	0	0	0	k__Fungi	p__Ascomycota	c__Eurotiomycetes	o__Eurotiales	f__Trichocomaceae	g__Penicillium	s__unidentified_Penicillium	New.CleanUp.ReferenceOTU85739
OTU425	0	0	0	0	0	0	0	0	0	0	0	0	0	0	0	0	0	0	0	0	0	0	0	0	0	0	0	0	0	0	0	1	0	0	0	0	k__Fungi	p__Ascomycota	c__Eurotiomycetes	o__Eurotiales	f__Trichocomaceae	g__Penicillium	s__unidentified_Penicillium	New.CleanUp.ReferenceOTU87991
OTU433	0	0	0	1	0	0	0	0	0	0	0	0	0	0	0	0	0	0	0	0	0	0	0	0	0	0	0	0	0	0	0	0	0	0	0	0	k__Fungi	p__Ascomycota	c__Eurotiomycetes	o__Eurotiales	f__Trichocomaceae	g__Penicillium	s__unidentified_Penicillium	New.CleanUp.ReferenceOTU91105
OTU436	1	0	0	0	0	0	0	0	0	0	0	0	0	0	0	0	0	0	0	0	0	0	0	0	0	0	0	0	0	0	0	0	0	0	0	0	k__Fungi	p__Ascomycota	c__Eurotiomycetes	o__Eurotiales	f__Trichocomaceae	g__Penicillium	s__unidentified_Penicillium	New.CleanUp.ReferenceOTU92003
OTU439	0	0	0	0	0	0	0	0	0	0	0	0	1	0	0	0	0	0	0	0	0	0	0	0	0	0	0	0	0	0	0	0	0	0	0	0	k__Fungi	p__Ascomycota	c__Eurotiomycetes	o__Eurotiales	f__Trichocomaceae	g__Penicillium	s__unidentified_Penicillium	New.CleanUp.ReferenceOTU92828
OTU441	0	0	0	0	0	0	0	0	0	0	0	0	0	0	0	0	0	0	0	0	0	0	0	0	0	0	0	0	0	0	0	1	0	0	0	0	k__Fungi	p__Ascomycota	c__Eurotiomycetes	o__Eurotiales	f__Trichocomaceae	g__Penicillium	s__unidentified_Penicillium	New.CleanUp.ReferenceOTU93349
OTU450	0	0	0	0	0	0	0	0	0	0	0	0	0	0	0	0	0	0	0	0	0	0	0	0	0	0	0	0	0	0	0	0	0	0	0	1	k__Fungi	p__Ascomycota	c__Eurotiomycetes	o__Eurotiales	f__Trichocomaceae	g__Penicillium	s__unidentified_Penicillium	New.CleanUp.ReferenceOTU96971
OTU452	0	0	0	0	0	0	0	0	0	0	0	0	1	0	0	0	0	0	0	0	0	0	0	0	0	0	0	0	0	0	0	0	0	0	0	0	k__Fungi	p__Ascomycota	c__Eurotiomycetes	o__Eurotiales	f__Trichocomaceae	g__Penicillium	s__unidentified_Penicillium	New.CleanUp.ReferenceOTU97259
OTU454	0	0	1	0	0	0	0	0	0	0	0	0	0	0	0	0	0	0	0	0	0	0	0	0	0	0	0	0	0	0	0	0	0	0	0	0	k__Fungi	p__Ascomycota	c__Eurotiomycetes	o__Eurotiales	f__Trichocomaceae	g__Penicillium	s__unidentified_Penicillium	New.CleanUp.ReferenceOTU97508
OTU458	0	0	0	0	0	0	0	0	0	0	0	0	0	0	1	0	0	0	0	0	0	0	0	0	0	0	0	0	0	0	0	0	0	0	0	0	k__Fungi	p__Ascomycota	c__Eurotiomycetes	o__Eurotiales	f__Trichocomaceae	g__Penicillium	s__unidentified_Penicillium	New.CleanUp.ReferenceOTU97852
OTU459	0	0	0	0	0	0	0	0	0	0	0	0	0	0	0	0	0	1	0	0	0	0	0	0	0	0	0	0	0	0	0	0	0	0	0	0	k__Fungi	p__Ascomycota	c__Eurotiomycetes	o__Eurotiales	f__Trichocomaceae	g__Penicillium	s__unidentified_Penicillium	New.CleanUp.ReferenceOTU98168
OTU460	0	0	0	0	0	0	0	0	0	0	0	0	0	0	0	0	0	0	0	0	0	0	0	0	0	1	0	0	0	0	0	0	0	0	0	0	k__Fungi	p__Ascomycota	c__Eurotiomycetes	o__Eurotiales	f__Trichocomaceae	g__Penicillium	s__unidentified_Penicillium	New.CleanUp.ReferenceOTU98487
OTU461	0	1	0	0	0	0	0	0	0	0	0	0	0	0	0	0	0	0	0	0	0	0	0	0	0	0	0	0	0	0	0	0	0	0	0	0	k__Fungi	p__Ascomycota	c__Eurotiomycetes	o__Eurotiales	f__Trichocomaceae	g__Penicillium	s__unidentified_Penicillium	New.CleanUp.ReferenceOTU98684
OTU462	0	0	0	0	0	0	0	0	0	0	0	0	0	0	0	0	0	0	0	0	0	0	0	0	0	0	0	1	0	0	0	0	0	0	0	0	k__Fungi	p__Ascomycota	c__Eurotiomycetes	o__Eurotiales	f__Trichocomaceae	g__Penicillium	s__unidentified_Penicillium	New.CleanUp.ReferenceOTU98701
OTU466	0	0	0	0	0	0	0	0	0	0	0	0	0	0	0	0	0	0	0	0	0	0	0	0	0	0	0	0	0	0	1	0	0	0	0	0	k__Fungi	p__Ascomycota	c__Eurotiomycetes	o__Eurotiales	f__Trichocomaceae	g__Penicillium	s__unidentified_Penicillium	New.CleanUp.ReferenceOTU99925
OTU467	0	0	0	0	0	0	0	0	0	0	0	0	0	0	0	0	0	0	0	0	0	0	0	0	0	0	0	1	0	0	0	0	0	0	0	0	k__Fungi	p__Ascomycota	c__Eurotiomycetes	o__Eurotiales	f__Trichocomaceae	g__Penicillium	s__unidentified_Penicillium	New.CleanUp.ReferenceOTU100250
OTU473	0	0	0	0	0	0	0	0	0	0	0	0	0	0	0	0	0	0	0	0	0	0	0	0	0	0	0	0	0	0	0	1	0	0	0	0	k__Fungi	p__Ascomycota	c__Eurotiomycetes	o__Eurotiales	f__Trichocomaceae	g__Penicillium	s__unidentified_Penicillium	New.CleanUp.ReferenceOTU100981
OTU483	0	0	0	0	0	0	0	0	0	0	0	0	0	0	0	0	0	0	0	0	0	0	0	0	0	0	0	0	0	0	1	0	0	0	0	0	k__Fungi	p__Ascomycota	c__Eurotiomycetes	o__Eurotiales	f__Trichocomaceae	g__Penicillium	s__unidentified_Penicillium	New.CleanUp.ReferenceOTU104467
OTU491	0	0	0	0	0	0	0	0	0	0	0	0	0	0	0	0	0	0	0	0	0	0	0	0	0	0	0	0	0	0	0	0	0	0	0	1	k__Fungi	p__Ascomycota	c__Eurotiomycetes	o__Eurotiales	f__Trichocomaceae	g__Penicillium	s__unidentified_Penicillium	New.CleanUp.ReferenceOTU107605
OTU500	0	0	0	0	0	0	0	0	0	0	0	0	0	0	0	0	0	0	0	0	0	0	0	0	0	0	0	0	1	0	0	0	0	0	0	0	k__Fungi	p__Ascomycota	c__Eurotiomycetes	o__Eurotiales	f__Trichocomaceae	g__Penicillium	s__unidentified_Penicillium	New.CleanUp.ReferenceOTU109856
OTU507	0	0	0	0	0	1	0	0	0	0	0	0	0	0	0	0	0	0	0	0	0	0	0	0	0	0	0	0	0	0	0	0	0	0	0	0	k__Fungi	p__Ascomycota	c__Eurotiomycetes	o__Eurotiales	f__Trichocomaceae	g__Penicillium	s__unidentified_Penicillium	New.CleanUp.ReferenceOTU112164
OTU509	0	0	0	0	0	0	0	0	0	0	0	0	0	0	0	0	0	1	0	0	0	0	0	0	0	0	0	0	0	0	0	0	0	0	0	0	k__Fungi	p__Ascomycota	c__Eurotiomycetes	o__Eurotiales	f__Trichocomaceae	g__Penicillium	s__unidentified_Penicillium	New.CleanUp.ReferenceOTU113285
OTU523	0	0	0	0	0	0	0	0	0	0	0	0	0	0	0	0	0	0	0	0	0	0	0	0	0	1	0	0	0	0	0	0	0	0	0	0	k__Fungi	p__Ascomycota	c__Eurotiomycetes	o__Eurotiales	f__Trichocomaceae	g__Penicillium	s__unidentified_Penicillium	New.CleanUp.ReferenceOTU116516
OTU526	0	0	0	0	0	0	0	0	0	0	0	0	0	0	0	0	0	0	0	0	0	0	0	0	0	0	0	0	0	1	0	0	0	0	0	0	k__Fungi	p__Ascomycota	c__Eurotiomycetes	o__Eurotiales	f__Trichocomaceae	g__Penicillium	s__unidentified_Penicillium	New.CleanUp.ReferenceOTU117695
OTU527	0	0	0	0	0	0	0	0	0	0	0	0	0	0	0	0	0	0	0	0	0	0	0	0	0	0	0	0	0	0	0	1	0	0	0	0	k__Fungi	p__Ascomycota	c__Eurotiomycetes	o__Eurotiales	f__Trichocomaceae	g__Penicillium	s__unidentified_Penicillium	New.CleanUp.ReferenceOTU117844
OTU542	0	0	0	0	0	0	0	0	0	0	0	0	0	0	0	0	0	0	0	0	0	0	0	0	0	1	0	0	0	0	0	0	0	0	0	0	k__Fungi	p__Ascomycota	c__Eurotiomycetes	o__Eurotiales	f__Trichocomaceae	g__Penicillium	s__unidentified_Penicillium	New.CleanUp.ReferenceOTU121725
OTU551	0	0	0	0	0	0	0	0	0	0	0	0	0	0	0	0	0	0	0	0	0	0	0	0	1	0	0	0	0	0	0	0	0	0	0	0	k__Fungi	p__Ascomycota	c__Eurotiomycetes	o__Eurotiales	f__Trichocomaceae	g__Penicillium	s__unidentified_Penicillium	New.CleanUp.ReferenceOTU123112
OTU552	0	0	0	0	0	0	0	0	0	0	0	0	0	0	0	0	0	0	0	0	0	0	0	0	0	0	0	0	0	0	0	1	0	0	0	0	k__Fungi	p__Ascomycota	c__Eurotiomycetes	o__Eurotiales	f__Trichocomaceae	g__Penicillium	s__unidentified_Penicillium	New.CleanUp.ReferenceOTU123381
OTU1280	0	0	0	0	0	0	0	0	0	0	0	0	1	0	0	0	0	0	0	0	0	0	0	0	0	0	0	0	0	0	0	0	0	0	0	0	k__Fungi	p__Ascomycota	c__Eurotiomycetes	o__Eurotiales	f__Trichocomaceae	g__Penicillium	s__unidentified_Penicillium	New.CleanUp.ReferenceOTU4838
OTU1295	0	0	0	0	0	0	0	0	0	0	0	0	0	0	0	0	0	1	0	0	0	0	0	0	0	0	0	0	0	0	0	0	0	0	0	0	k__Fungi	p__Ascomycota	c__Eurotiomycetes	o__Eurotiales	f__Trichocomaceae	g__Penicillium	s__unidentified_Penicillium	New.CleanUp.ReferenceOTU9921
OTU1297	0	0	0	0	0	0	0	0	0	0	0	0	1	0	0	0	0	0	0	0	0	0	0	0	0	0	0	0	0	0	0	0	0	0	0	0	k__Fungi	p__Ascomycota	c__Eurotiomycetes	o__Eurotiales	f__Trichocomaceae	g__Penicillium	s__unidentified_Penicillium	New.CleanUp.ReferenceOTU10270
OTU1303	0	0	0	0	0	0	0	0	0	0	0	0	0	0	0	0	0	0	0	0	0	0	0	0	0	1	0	0	0	0	0	0	0	0	0	0	k__Fungi	p__Ascomycota	c__Eurotiomycetes	o__Eurotiales	f__Trichocomaceae	g__Penicillium	s__unidentified_Penicillium	New.CleanUp.ReferenceOTU11818
OTU1332	0	0	0	0	0	0	0	0	0	0	0	0	0	0	0	0	0	0	0	0	0	0	0	0	0	1	0	0	0	0	0	0	0	0	0	0	k__Fungi	p__Ascomycota	c__Eurotiomycetes	o__Eurotiales	f__Trichocomaceae	g__Penicillium	s__unidentified_Penicillium	New.CleanUp.ReferenceOTU23619
OTU1346	0	0	0	0	0	0	0	0	0	0	0	0	0	0	0	0	0	0	0	0	0	0	0	0	0	0	0	1	0	0	0	0	0	0	0	0	k__Fungi	p__Ascomycota	c__Eurotiomycetes	o__Eurotiales	f__Trichocomaceae	g__Penicillium	s__unidentified_Penicillium	New.CleanUp.ReferenceOTU27608
OTU1366	0	0	0	0	0	0	0	0	0	0	0	0	0	0	0	0	0	0	0	0	0	0	0	0	0	0	1	0	0	0	0	0	0	0	0	0	k__Fungi	p__Ascomycota	c__Eurotiomycetes	o__Eurotiales	f__Trichocomaceae	g__Penicillium	s__unidentified_Penicillium	New.CleanUp.ReferenceOTU35055
OTU1369	0	0	0	0	0	0	0	0	0	0	0	0	0	0	0	0	0	0	0	0	0	0	0	0	0	0	0	0	0	1	0	0	0	0	0	0	k__Fungi	p__Ascomycota	c__Eurotiomycetes	o__Eurotiales	f__Trichocomaceae	g__Penicillium	s__unidentified_Penicillium	New.CleanUp.ReferenceOTU36226
OTU1392	0	0	0	0	0	0	0	0	0	0	0	0	0	0	0	0	0	0	0	0	0	0	0	0	0	0	0	1	0	0	0	0	0	0	0	0	k__Fungi	p__Ascomycota	c__Eurotiomycetes	o__Eurotiales	f__Trichocomaceae	g__Penicillium	s__unidentified_Penicillium	New.CleanUp.ReferenceOTU46325
OTU1421	0	0	0	0	0	0	0	0	0	0	0	0	0	0	0	0	0	0	0	0	0	0	0	0	0	0	0	1	0	0	0	0	0	0	0	0	k__Fungi	p__Ascomycota	c__Eurotiomycetes	o__Eurotiales	f__Trichocomaceae	g__Penicillium	s__unidentified_Penicillium	New.CleanUp.ReferenceOTU55888
OTU1433	0	0	0	0	0	0	0	0	0	0	0	0	0	0	0	0	0	0	0	0	0	0	0	0	0	0	0	0	0	0	1	0	0	0	0	0	k__Fungi	p__Ascomycota	c__Eurotiomycetes	o__Eurotiales	f__Trichocomaceae	g__Penicillium	s__unidentified_Penicillium	New.CleanUp.ReferenceOTU59322
OTU1445	0	0	0	0	0	0	0	0	0	0	0	0	0	0	0	0	0	0	1	0	0	0	0	0	0	0	0	0	0	0	0	0	0	0	0	0	k__Fungi	p__Ascomycota	c__Eurotiomycetes	o__Eurotiales	f__Trichocomaceae	g__Penicillium	s__unidentified_Penicillium	New.CleanUp.ReferenceOTU63466
OTU1467	0	0	0	0	0	0	0	0	0	0	0	0	0	0	0	0	0	0	0	0	0	0	0	0	0	1	0	0	0	0	0	0	0	0	0	0	k__Fungi	p__Ascomycota	c__Eurotiomycetes	o__Eurotiales	f__Trichocomaceae	g__Penicillium	s__unidentified_Penicillium	New.CleanUp.ReferenceOTU69958
OTU1480	0	0	0	0	0	0	0	0	1	0	0	0	0	0	0	0	0	0	0	0	0	0	0	0	0	0	0	0	0	0	0	0	0	0	0	0	k__Fungi	p__Ascomycota	c__Eurotiomycetes	o__Eurotiales	f__Trichocomaceae	g__Penicillium	s__unidentified_Penicillium	New.CleanUp.ReferenceOTU73194
OTU1493	0	0	0	0	0	0	0	0	0	0	0	0	0	0	0	0	0	0	0	0	0	0	0	0	0	1	0	0	0	0	0	0	0	0	0	0	k__Fungi	p__Ascomycota	c__Eurotiomycetes	o__Eurotiales	f__Trichocomaceae	g__Penicillium	s__unidentified_Penicillium	New.CleanUp.ReferenceOTU76121
OTU1498	0	0	0	0	0	0	0	0	0	0	0	0	0	0	0	0	0	0	0	0	0	0	0	0	0	0	0	0	0	1	0	0	0	0	0	0	k__Fungi	p__Ascomycota	c__Eurotiomycetes	o__Eurotiales	f__Trichocomaceae	g__Penicillium	s__unidentified_Penicillium	New.CleanUp.ReferenceOTU77076
OTU1520	0	0	0	0	0	0	0	0	0	0	0	0	0	0	0	0	0	0	0	0	0	0	0	0	0	0	0	0	1	0	0	0	0	0	0	0	k__Fungi	p__Ascomycota	c__Eurotiomycetes	o__Eurotiales	f__Trichocomaceae	g__Penicillium	s__unidentified_Penicillium	New.CleanUp.ReferenceOTU82083
OTU1547	0	0	0	0	0	0	0	0	0	0	0	0	0	0	0	0	0	0	0	0	0	0	0	0	0	0	0	0	0	0	1	0	0	0	0	0	k__Fungi	p__Ascomycota	c__Eurotiomycetes	o__Eurotiales	f__Trichocomaceae	g__Penicillium	s__unidentified_Penicillium	New.CleanUp.ReferenceOTU92251
OTU1557	0	0	0	0	0	0	1	0	0	0	0	0	0	0	0	0	0	0	0	0	0	0	0	0	0	0	0	0	0	0	0	0	0	0	0	0	k__Fungi	p__Ascomycota	c__Eurotiomycetes	o__Eurotiales	f__Trichocomaceae	g__Penicillium	s__unidentified_Penicillium	New.CleanUp.ReferenceOTU94054
OTU1566	0	0	0	0	0	0	0	0	0	0	0	0	0	0	0	0	0	0	0	0	0	0	0	0	0	0	0	0	1	0	0	0	0	0	0	0	k__Fungi	p__Ascomycota	c__Eurotiomycetes	o__Eurotiales	f__Trichocomaceae	g__Penicillium	s__unidentified_Penicillium	New.CleanUp.ReferenceOTU97345
OTU1575	0	0	0	0	0	0	0	0	1	0	0	0	0	0	0	0	0	0	0	0	0	0	0	0	0	0	0	0	0	0	0	0	0	0	0	0	k__Fungi	p__Ascomycota	c__Eurotiomycetes	o__Eurotiales	f__Trichocomaceae	g__Penicillium	s__unidentified_Penicillium	New.CleanUp.ReferenceOTU100296
OTU1599	0	0	0	0	0	0	0	0	0	0	0	0	0	0	0	0	1	0	0	0	0	0	0	0	0	0	0	0	0	0	0	0	0	0	0	0	k__Fungi	p__Ascomycota	c__Eurotiomycetes	o__Eurotiales	f__Trichocomaceae	g__Penicillium	s__unidentified_Penicillium	New.CleanUp.ReferenceOTU108838
OTU1604	0	0	0	0	0	0	0	0	0	0	0	0	0	0	0	0	0	0	0	0	0	0	0	0	0	0	0	1	0	0	0	0	0	0	0	0	k__Fungi	p__Ascomycota	c__Eurotiomycetes	o__Eurotiales	f__Trichocomaceae	g__Penicillium	s__unidentified_Penicillium	New.CleanUp.ReferenceOTU109955
OTU1623	0	0	0	0	0	0	0	0	0	0	0	0	0	0	0	0	0	0	0	0	0	0	0	0	0	0	0	0	0	0	0	0	1	0	0	0	k__Fungi	p__Ascomycota	c__Eurotiomycetes	o__Eurotiales	f__Trichocomaceae	g__Penicillium	s__unidentified_Penicillium	New.CleanUp.ReferenceOTU115577
OTU1635	0	0	0	0	0	0	0	0	0	0	0	0	0	0	0	0	0	0	0	0	0	0	0	0	0	0	1	0	0	0	0	0	0	0	0	0	k__Fungi	p__Ascomycota	c__Eurotiomycetes	o__Eurotiales	f__Trichocomaceae	g__Penicillium	s__unidentified_Penicillium	New.CleanUp.ReferenceOTU121801
OTU1638	0	0	0	0	0	0	0	0	0	0	0	0	0	0	0	0	0	0	0	0	0	0	0	0	0	1	0	0	0	0	0	0	0	0	0	0	k__Fungi	p__Ascomycota	c__Eurotiomycetes	o__Eurotiales	f__Trichocomaceae	g__Penicillium	s__unidentified_Penicillium	New.CleanUp.ReferenceOTU123040
OTU2485	0	0	0	0	0	0	0	0	0	0	0	0	0	0	0	0	0	0	0	0	0	0	0	0	0	0	0	0	0	0	0	0	0	1	0	0	k__Fungi	p__Ascomycota	c__Eurotiomycetes	o__Eurotiales	f__Trichocomaceae	g__Penicillium	s__unidentified_Penicillium	New.CleanUp.ReferenceOTU10667
OTU2544	0	0	0	0	0	0	1	0	0	0	0	0	0	0	0	0	0	0	0	0	0	0	0	0	0	0	0	0	0	0	0	0	0	0	0	0	k__Fungi	p__Ascomycota	c__Eurotiomycetes	o__Eurotiales	f__Trichocomaceae	g__Penicillium	s__unidentified_Penicillium	New.CleanUp.ReferenceOTU45546
OTU2558	0	0	0	0	0	0	0	0	0	0	0	0	0	0	0	0	0	0	0	0	0	0	0	0	0	0	0	0	1	0	0	0	0	0	0	0	k__Fungi	p__Ascomycota	c__Eurotiomycetes	o__Eurotiales	f__Trichocomaceae	g__Penicillium	s__unidentified_Penicillium	New.CleanUp.ReferenceOTU61191
OTU1327	0	0	0	0	0	0	0	0	0	0	0	0	0	0	0	0	0	0	0	0	0	0	0	0	0	0	0	0	1	0	0	1	0	0	0	0	k__Fungi	p__Ascomycota	c__Eurotiomycetes	o__Eurotiales	f__Trichocomaceae	g__Penicillium	s__Penicillium_adametzii	New.CleanUp.ReferenceOTU22291
OTU1579	0	0	0	0	0	0	0	0	0	0	0	0	0	0	0	0	0	0	0	0	0	0	0	0	0	0	0	0	0	0	0	1	0	0	1	0	k__Fungi	p__Ascomycota	c__Eurotiomycetes	o__Eurotiales	f__Trichocomaceae	g__Penicillium	s__Penicillium_adametzii	New.CleanUp.ReferenceOTU101366
OTU212	0	0	0	0	0	0	0	0	0	0	0	0	0	0	0	0	0	0	0	0	0	0	0	0	0	0	0	0	0	0	0	0	0	0	1	0	k__Fungi	p__Ascomycota	c__Eurotiomycetes	o__Eurotiales	f__Trichocomaceae	g__Penicillium	s__Penicillium_adametzii	New.CleanUp.ReferenceOTU21438
OTU1324	0	0	0	0	0	0	0	0	0	0	0	0	0	0	0	0	0	0	0	0	0	0	0	0	0	0	0	0	0	0	0	0	0	0	1	0	k__Fungi	p__Ascomycota	c__Eurotiomycetes	o__Eurotiales	f__Trichocomaceae	g__Penicillium	s__Penicillium_adametzii	New.CleanUp.ReferenceOTU22135
OTU1630	0	0	1	0	0	0	0	0	0	0	0	0	0	0	0	0	0	0	0	0	0	0	0	0	0	0	0	0	0	0	0	0	0	0	0	0	k__Fungi	p__Ascomycota	c__Eurotiomycetes	o__Eurotiales	f__Trichocomaceae	g__Penicillium	s__Penicillium_brocae	New.CleanUp.ReferenceOTU117750
OTU6619	0	2	0	0	0	8	0	1	2	0	5	0	142	1	12	0	6	1	14	35	0	0	42	0	0	0	0	0	0	0	1	0	165	23	4	137	k__Fungi	p__Ascomycota	c__Eurotiomycetes	o__Eurotiales	f__Trichocomaceae	g__Penicillium	s__Penicillium_melinii	SH022271.07FU_AY373923_refs
OTU5411	0	0	0	6	0	0	0	1	0	0	0	1	0	6	0	0	2	1	0	0	2	4	0	0	0	0	0	0	0	0	0	0	0	0	0	0	k__Fungi	p__Ascomycota	c__Eurotiomycetes	o__Eurotiales	f__Trichocomaceae	g__Penicillium	s__Penicillium_nodositatum	SH017576.07FU_KC790403_refs
OTU2617	0	0	0	0	0	0	0	0	0	0	0	0	0	0	0	0	0	0	0	0	3	0	0	0	0	0	0	0	0	0	0	0	0	0	0	0	k__Fungi	p__Ascomycota	c__Eurotiomycetes	o__Eurotiales	f__Trichocomaceae	g__Penicillium	s__Penicillium_nodositatum	New.CleanUp.ReferenceOTU102711
OTU3774	0	0	0	0	0	0	0	0	0	0	0	0	0	0	0	0	0	0	0	0	0	0	0	0	0	0	0	0	0	0	0	2	0	0	2	0	k__Fungi	p__Ascomycota	c__Eurotiomycetes	o__Eurotiales	f__Trichocomaceae	g__Penicillium	s__Penicillium_ochrochloron	SH027146.07FU_HQ850357_reps
OTU2443	0	0	0	0	0	0	0	0	0	0	0	0	0	0	0	0	0	0	0	0	0	0	0	0	0	0	0	0	0	0	0	1	0	0	1	0	k__Fungi	p__Ascomycota	c__Eurotiomycetes	o__Eurotiales	f__Trichocomaceae	g__Penicillium	s__Penicillium_ochrochloron	SH491519.07FU_LN827698_reps_singleton
OTU401	0	0	0	0	0	0	0	0	0	0	0	0	0	0	0	0	0	0	0	0	0	0	0	0	0	0	0	0	0	0	0	0	0	0	1	0	k__Fungi	p__Ascomycota	c__Eurotiomycetes	o__Eurotiales	f__Trichocomaceae	g__Penicillium	s__Penicillium_ochrochloron	New.CleanUp.ReferenceOTU79483
OTU6555	2	1	15	2	14	1	15	13	3	0	8	16	0	0	0	0	0	1	0	0	0	3	0	1	0	0	1	0	0	1	0	3	1	355	22	7	k__Fungi	p__Ascomycota	c__Eurotiomycetes	o__Eurotiales	f__Trichocomaceae	g__Penicillium	s__Penicillium_pimiteouiense	SH005488.07FU_AF037431_refs
OTU6029	0	0	0	4	0	0	0	0	0	0	0	1	30	6	9	3	13	0	7	0	0	5	0	0	2	2	0	2	3	2	0	9	0	0	2	0	k__Fungi	p__Ascomycota	c__Eurotiomycetes	o__Eurotiales	f__Trichocomaceae	g__Penicillium	s__unidentified_Penicillium	New.ReferenceOTU180
OTU6043	0	0	1	0	0	0	2	0	5	0	27	0	0	0	4	2	0	7	0	0	8	0	0	0	0	0	0	0	0	0	0	0	0	0	0	0	k__Fungi	p__Ascomycota	c__Eurotiomycetes	o__Eurotiales	f__Trichocomaceae	g__Penicillium	s__unidentified_Penicillium	SH023910.07FU_GU973625_reps_singleton
OTU2557	0	1	0	0	0	0	0	0	0	0	0	0	0	0	0	0	0	1	0	0	0	1	0	0	0	0	0	0	0	0	0	0	0	0	0	0	k__Fungi	p__Ascomycota	c__Eurotiomycetes	o__Eurotiales	f__Trichocomaceae	g__Penicillium	s__unidentified_Penicillium	New.CleanUp.ReferenceOTU59089
OTU1285	0	0	0	0	0	1	0	0	0	0	0	0	0	0	0	0	0	0	0	0	0	0	0	0	0	0	0	0	0	0	0	1	0	0	0	0	k__Fungi	p__Ascomycota	c__Eurotiomycetes	o__Eurotiales	f__Trichocomaceae	g__Penicillium	s__unidentified_Penicillium	New.CleanUp.ReferenceOTU5932
OTU1459	0	0	0	0	0	0	0	0	0	0	0	0	0	0	0	0	0	0	0	0	0	0	0	0	0	0	0	0	0	0	0	0	1	0	1	0	k__Fungi	p__Ascomycota	c__Eurotiomycetes	o__Eurotiales	f__Trichocomaceae	g__Penicillium	s__unidentified_Penicillium	New.CleanUp.ReferenceOTU67303
OTU216	0	0	0	0	0	0	0	0	0	0	0	0	0	0	0	0	0	0	0	0	0	0	0	0	0	0	0	0	0	0	1	0	0	0	0	0	k__Fungi	p__Ascomycota	c__Eurotiomycetes	o__Eurotiales	f__Trichocomaceae	g__Penicillium	s__unidentified_Penicillium	New.CleanUp.ReferenceOTU22479
OTU221	0	0	0	0	0	0	0	0	0	0	0	0	0	0	0	0	0	0	0	0	0	0	0	0	0	0	0	0	0	0	0	0	0	0	0	1	k__Fungi	p__Ascomycota	c__Eurotiomycetes	o__Eurotiales	f__Trichocomaceae	g__Penicillium	s__unidentified_Penicillium	New.CleanUp.ReferenceOTU23638
OTU278	0	1	0	0	0	0	0	0	0	0	0	0	0	0	0	0	0	0	0	0	0	0	0	0	0	0	0	0	0	0	0	0	0	0	0	0	k__Fungi	p__Ascomycota	c__Eurotiomycetes	o__Eurotiales	f__Trichocomaceae	g__Penicillium	s__unidentified_Penicillium	New.CleanUp.ReferenceOTU44810
OTU1265	0	0	0	0	0	0	0	0	0	0	0	0	0	0	0	0	0	0	0	0	0	0	0	0	0	0	0	0	1	0	0	0	0	0	0	0	k__Fungi	p__Ascomycota	c__Eurotiomycetes	o__Eurotiales	f__Trichocomaceae	g__Penicillium	s__unidentified_Penicillium	New.CleanUp.ReferenceOTU758
OTU1501	0	0	0	0	0	0	0	0	0	0	0	0	0	0	0	0	0	0	0	0	0	0	0	0	0	0	0	0	0	0	0	0	0	0	1	0	k__Fungi	p__Ascomycota	c__Eurotiomycetes	o__Eurotiales	f__Trichocomaceae	g__Penicillium	s__unidentified_Penicillium	New.CleanUp.ReferenceOTU77125
OTU1527	0	1	0	0	0	0	0	0	0	0	0	0	0	0	0	0	0	0	0	0	0	0	0	0	0	0	0	0	0	0	0	0	0	0	0	0	k__Fungi	p__Ascomycota	c__Eurotiomycetes	o__Eurotiales	f__Trichocomaceae	g__Penicillium	s__unidentified_Penicillium	New.CleanUp.ReferenceOTU83521
OTU1592	0	0	0	0	0	0	0	0	0	0	0	0	0	0	0	0	0	0	0	0	0	0	0	0	0	0	0	0	1	0	0	0	0	0	0	0	k__Fungi	p__Ascomycota	c__Eurotiomycetes	o__Eurotiales	f__Trichocomaceae	g__Penicillium	s__unidentified_Penicillium	New.CleanUp.ReferenceOTU107349
OTU5910	1	2	0	0	22	11	0	0	0	0	0	0	0	0	0	0	2	0	0	0	0	0	0	0	2	0	0	5	4	0	32	0	0	0	0	2	k__Fungi	p__Ascomycota	c__Eurotiomycetes	o__Eurotiales	f__Trichocomaceae	g__Penicillium	s__Penicillium_spinulosum	SH022269.07FU_AY373933_refs
OTU4289	0	0	0	0	0	0	0	0	0	0	0	0	11	0	0	0	0	0	0	0	0	0	0	0	0	0	0	0	0	0	0	0	0	0	0	0	k__Fungi	p__Ascomycota	c__Eurotiomycetes	o__Eurotiales	f__Trichocomaceae	g__Penicillium	s__Penicillium_spinulosum	New.ReferenceOTU618
OTU2552	0	0	0	0	0	0	0	0	0	0	0	0	0	0	0	0	0	0	0	0	0	0	0	0	1	0	0	1	1	0	0	0	0	0	0	0	k__Fungi	p__Ascomycota	c__Eurotiomycetes	o__Eurotiales	f__Trichocomaceae	g__Penicillium	s__Penicillium_spinulosum	New.CleanUp.ReferenceOTU54421
OTU4058	0	0	0	0	0	0	0	2	0	0	0	0	0	0	0	0	0	1	0	0	0	0	0	0	0	0	0	0	0	0	0	0	0	0	0	0	k__Fungi	p__Ascomycota	c__Eurotiomycetes	o__Eurotiales	f__Trichocomaceae	g__Penicillium	s__Penicillium_spinulosum	SH457973.07FU_LN482400_reps_singleton
OTU5190	0	0	1	0	0	0	0	0	0	0	0	0	0	0	3	0	16	0	0	0	12	0	0	0	0	0	0	0	0	0	0	0	0	0	0	0	k__Fungi	p__Ascomycota	c__Eurotiomycetes	o__Eurotiales	f__Trichocomaceae	g__Talaromyces	s__unidentified_Talaromyces	SH023904.07FU_JQ660374_reps_singleton
OTU5072	0	0	0	0	0	0	0	0	0	0	0	27	0	0	0	0	0	0	0	0	0	0	0	0	0	0	0	0	0	0	0	0	0	0	0	0	k__Fungi	p__Ascomycota	c__Eurotiomycetes	o__Eurotiales	f__Trichocomaceae	g__Talaromyces	s__unidentified_Talaromyces	New.CleanUp.ReferenceOTU118221
OTU4219	0	0	0	0	0	0	0	0	0	0	0	0	0	0	0	0	0	0	0	0	5	5	0	0	0	0	0	0	0	0	0	0	0	0	0	0	k__Fungi	p__Ascomycota	c__Eurotiomycetes	o__Eurotiales	f__Trichocomaceae	g__Talaromyces	s__unidentified_Talaromyces	New.CleanUp.ReferenceOTU120742
OTU6162	0	0	0	0	0	0	0	0	0	0	0	0	0	0	0	0	0	0	0	0	2	0	0	0	0	0	0	0	0	0	0	1	0	0	0	0	k__Fungi	p__Ascomycota	c__Eurotiomycetes	o__Eurotiales	f__Trichocomaceae	g__Talaromyces	s__unidentified_Talaromyces	New.CleanUp.ReferenceOTU13144
OTU3339	0	0	0	0	0	0	0	0	0	0	0	0	0	0	0	0	0	0	0	0	0	0	1	0	0	0	0	0	0	0	0	0	0	0	0	0	k__Fungi	p__Ascomycota	c__Eurotiomycetes	o__Eurotiales	f__Trichocomaceae	g__Talaromyces	s__unidentified_Talaromyces	SH497248.07FU_KT358887_reps_singleton
OTU6179	0	0	0	2	2	0	49	5	1	2	1	2	0	0	0	0	0	0	0	2	0	0	2	0	0	0	0	0	0	1	0	0	32	11	26	25	k__Fungi	p__Ascomycota	c__Eurotiomycetes	o__Eurotiales	f__Trichocomaceae	g__Talaromyces	s__Talaromyces_luteus	SH023490.07FU_L14525_reps
OTU5811	0	0	0	0	0	0	0	0	0	0	0	0	0	0	0	0	0	0	0	0	0	0	0	0	0	0	0	0	0	0	0	2	7	5	0	0	k__Fungi	p__Ascomycota	c__Eurotiomycetes	o__Eurotiales	f__Trichocomaceae	g__Talaromyces	s__Talaromyces_minioluteus	New.CleanUp.ReferenceOTU43451
OTU4831	0	0	0	0	0	0	0	0	0	0	0	0	0	0	0	0	0	0	0	0	0	0	0	0	0	0	0	0	0	0	0	0	3	4	2	0	k__Fungi	p__Ascomycota	c__Eurotiomycetes	o__Eurotiales	f__Trichocomaceae	g__Talaromyces	s__Talaromyces_minioluteus	New.CleanUp.ReferenceOTU12812
OTU6916	0	1	0	16	0	9	0	1	63	227	65	21	8	0	0	0	60	0	0	0	0	0	9	0	2	20	135	1	0	0	40	26	271	209	1207	1299	k__Fungi	p__Ascomycota	c__Eurotiomycetes	o__Eurotiales	f__Trichocomaceae	g__Talaromyces	s__Talaromyces_proteolyticus	New.ReferenceOTU871
OTU2447	0	0	0	0	0	0	0	0	0	0	0	0	0	0	0	0	0	0	0	0	0	0	0	0	0	0	0	0	0	0	0	0	0	2	0	1	k__Fungi	p__Ascomycota	c__Eurotiomycetes	o__Eurotiales	f__Trichocomaceae	g__Talaromyces	s__Talaromyces_proteolyticus	SH017675.07FU_JN899387_refs
OTU6827	370	293	8	114	856	1	13	108	0	0	0	0	0	28	0	0	0	0	2	1	6	0	0	0	0	0	0	0	0	0	0	0	0	0	0	0	k__Fungi	p__Ascomycota	c__Eurotiomycetes	o__Eurotiales	f__Trichocomaceae	g__unidentified_Trichocomaceae	s__unidentified_Trichocomaceae	SH023489.07FU_EF619838_reps
OTU6800	0	17	11	82	182	23	135	107	57	47	136	154	160	3	8	0	5	8	16	11	0	0	0	0	0	0	4	0	0	0	0	0	17	9	27	28	k__Fungi	p__Ascomycota	c__Eurotiomycetes	o__Eurotiales	f__Trichocomaceae	g__unidentified_Trichocomaceae	s__unidentified_Trichocomaceae	SH023488.07FU_GQ169319_reps
OTU6269	23	11	5	1	128	0	9	12	0	0	0	0	0	7	0	0	0	0	1	0	17	0	6	0	0	0	0	0	0	0	0	0	0	0	0	0	k__Fungi	p__Ascomycota	c__Eurotiomycetes	o__Eurotiales	f__Trichocomaceae	g__unidentified_Trichocomaceae	s__unidentified_Trichocomaceae	New.ReferenceOTU674
OTU6064	0	0	0	0	0	0	0	0	18	38	30	0	0	0	0	0	0	0	0	0	0	0	0	0	0	0	0	0	0	0	0	0	0	0	0	0	k__Fungi	p__Ascomycota	c__Eurotiomycetes	o__Eurotiales	f__Trichocomaceae	g__unidentified_Trichocomaceae	s__unidentified_Trichocomaceae	New.CleanUp.ReferenceOTU16677
OTU5214	0	0	0	0	0	0	0	0	0	0	0	0	0	0	0	0	0	0	0	0	0	0	0	0	0	0	0	1	10	8	0	11	0	0	0	0	k__Fungi	p__Ascomycota	c__Eurotiomycetes	o__Eurotiales	f__Trichocomaceae	g__unidentified_Trichocomaceae	s__unidentified_Trichocomaceae	SH020513.07FU_KC506214_reps_singleton
OTU4865	0	0	4	0	0	0	0	0	0	0	0	0	0	0	0	0	0	0	0	0	0	0	0	0	1	1	0	0	1	2	4	0	0	0	0	0	k__Fungi	p__Ascomycota	c__Eurotiomycetes	o__Eurotiales	f__Trichocomaceae	g__unidentified_Trichocomaceae	s__unidentified_Trichocomaceae	New.CleanUp.ReferenceOTU16493
OTU4381	0	0	0	2	2	1	0	1	0	1	0	3	1	0	0	0	0	0	0	0	0	0	0	0	0	0	0	0	0	0	0	0	0	0	0	0	k__Fungi	p__Ascomycota	c__Eurotiomycetes	o__Eurotiales	f__Trichocomaceae	g__unidentified_Trichocomaceae	s__unidentified_Trichocomaceae	New.CleanUp.ReferenceOTU29235
OTU3084	0	0	0	0	0	0	0	0	0	0	0	0	0	0	0	0	0	1	0	0	0	0	0	0	0	0	0	0	3	0	0	0	0	0	0	0	k__Fungi	p__Ascomycota	c__Eurotiomycetes	o__Eurotiales	f__Trichocomaceae	g__unidentified_Trichocomaceae	s__unidentified_Trichocomaceae	New.CleanUp.ReferenceOTU74004
OTU1192	0	0	0	0	0	0	0	0	0	0	0	0	0	0	0	0	0	0	0	0	0	0	0	0	0	0	0	0	0	0	0	0	2	0	0	0	k__Fungi	p__Ascomycota	c__Eurotiomycetes	o__Eurotiales	f__Trichocomaceae	g__unidentified_Trichocomaceae	s__unidentified_Trichocomaceae	SH014099.07FU_KF815665_reps
OTU145	0	0	0	0	0	0	0	1	0	0	0	0	0	0	0	0	0	0	0	0	0	0	0	0	0	0	0	0	0	0	0	0	0	0	0	0	k__Fungi	p__Ascomycota	c__Eurotiomycetes	o__Eurotiales	f__Trichocomaceae	g__unidentified_Trichocomaceae	s__unidentified_Trichocomaceae	New.CleanUp.ReferenceOTU2670
OTU243	0	0	0	0	1	0	0	0	0	0	0	0	0	0	0	0	0	0	0	0	0	0	0	0	0	0	0	0	0	0	0	0	0	0	0	0	k__Fungi	p__Ascomycota	c__Eurotiomycetes	o__Eurotiales	f__Trichocomaceae	g__unidentified_Trichocomaceae	s__unidentified_Trichocomaceae	New.CleanUp.ReferenceOTU31814
OTU474	0	0	0	0	0	0	0	1	0	0	0	0	0	0	0	0	0	0	0	0	0	0	0	0	0	0	0	0	0	0	0	0	0	0	0	0	k__Fungi	p__Ascomycota	c__Eurotiomycetes	o__Eurotiales	f__Trichocomaceae	g__unidentified_Trichocomaceae	s__unidentified_Trichocomaceae	New.CleanUp.ReferenceOTU101172
OTU524	0	0	0	0	0	0	0	0	0	0	0	0	0	0	0	0	0	0	0	0	0	0	0	0	0	0	0	0	0	0	0	0	0	0	1	0	k__Fungi	p__Ascomycota	c__Eurotiomycetes	o__Eurotiales	f__Trichocomaceae	g__unidentified_Trichocomaceae	s__unidentified_Trichocomaceae	New.CleanUp.ReferenceOTU116745
OTU6837	79	19	18	69	29	38	74	17	5	1	0	0	150	13	3	23	4	217	51	17	74	92	34	0	122	280	53	129	92	28	5	40	0	0	0	0	k__Fungi	p__Ascomycota	c__Eurotiomycetes	o__Eurotiales	f__unidentified_Eurotiales	g__unidentified_Eurotiales	s__unidentified_Eurotiales	SH014171.07FU_KF767326_reps_singleton
OTU6674	48	7	14	35	1	1	4	10	9	0	0	16	96	21	28	23	3	23	69	42	0	1	0	0	24	21	14	5	104	29	5	28	0	1	0	2	k__Fungi	p__Ascomycota	c__Eurotiomycetes	o__Eurotiales	f__unidentified_Eurotiales	g__unidentified_Eurotiales	s__unidentified_Eurotiales	SH016733.07FU_KC768092_reps_singleton
OTU6584	0	6	0	8	11	41	19	0	0	0	4	0	90	0	0	0	24	33	0	3	0	0	2	0	29	26	17	58	16	24	20	25	0	7	10	17	k__Fungi	p__Ascomycota	c__Eurotiomycetes	o__Eurotiales	f__unidentified_Eurotiales	g__unidentified_Eurotiales	s__unidentified_Eurotiales	New.CleanUp.ReferenceOTU76645
OTU6601	9	0	50	13	1	0	22	4	1	0	0	0	23	31	7	51	1	31	7	24	0	0	2	0	9	14	2	3	78	20	2	6	0	0	0	0	k__Fungi	p__Ascomycota	c__Eurotiomycetes	o__Eurotiales	f__unidentified_Eurotiales	g__unidentified_Eurotiales	s__unidentified_Eurotiales	SH016730.07FU_AJ748692_refs
OTU6464	0	3	0	3	0	1	0	0	0	0	0	0	28	14	34	128	0	18	5	10	0	0	0	0	5	2	0	3	3	0	0	0	0	0	0	0	k__Fungi	p__Ascomycota	c__Eurotiomycetes	o__Eurotiales	f__unidentified_Eurotiales	g__unidentified_Eurotiales	s__unidentified_Eurotiales	New.ReferenceOTU84
OTU6411	0	6	0	11	0	4	57	4	0	10	0	0	17	0	0	0	21	16	1	2	0	0	0	0	0	1	21	5	0	0	1	1	1	50	8	6	k__Fungi	p__Ascomycota	c__Eurotiomycetes	o__Eurotiales	f__unidentified_Eurotiales	g__unidentified_Eurotiales	s__unidentified_Eurotiales	New.CleanUp.ReferenceOTU88286
OTU6344	0	1	0	15	15	8	60	18	0	0	0	0	58	0	0	0	5	13	0	1	0	0	9	0	0	0	0	0	0	0	0	0	7	22	1	7	k__Fungi	p__Ascomycota	c__Eurotiomycetes	o__Eurotiales	f__unidentified_Eurotiales	g__unidentified_Eurotiales	s__unidentified_Eurotiales	SH012363.07FU_AB847065_reps
OTU5979	1	1	3	2	2	0	3	0	0	0	1	0	7	7	0	6	1	6	0	1	2	1	7	13	2	13	1	4	7	5	0	1	0	0	2	0	k__Fungi	p__Ascomycota	c__Eurotiomycetes	o__Eurotiales	f__unidentified_Eurotiales	g__unidentified_Eurotiales	s__unidentified_Eurotiales	SH022268.07FU_AF033475_refs
OTU5855	8	2	20	3	0	1	2	0	0	0	0	0	0	0	4	6	8	0	0	0	0	0	0	0	5	0	0	0	16	1	0	5	0	0	0	1	k__Fungi	p__Ascomycota	c__Eurotiomycetes	o__Eurotiales	f__unidentified_Eurotiales	g__unidentified_Eurotiales	s__unidentified_Eurotiales	New.CleanUp.ReferenceOTU52036
OTU5485	0	0	8	0	0	0	10	0	0	0	0	0	0	0	1	0	0	0	9	0	0	0	0	7	0	0	0	0	0	0	0	0	0	0	0	0	k__Fungi	p__Ascomycota	c__Eurotiomycetes	o__Eurotiales	f__unidentified_Eurotiales	g__unidentified_Eurotiales	s__unidentified_Eurotiales	New.ReferenceOTU762
OTU5562	0	0	0	0	0	0	0	0	0	0	0	0	0	7	1	0	0	14	12	1	0	0	0	0	0	0	0	0	0	0	0	0	0	0	0	0	k__Fungi	p__Ascomycota	c__Eurotiomycetes	o__Eurotiales	f__unidentified_Eurotiales	g__unidentified_Eurotiales	s__unidentified_Eurotiales	New.CleanUp.ReferenceOTU52623
OTU5681	0	0	0	0	8	3	1	0	2	0	0	0	0	0	0	0	0	1	0	0	0	0	0	0	0	0	0	2	0	0	0	0	0	1	2	6	k__Fungi	p__Ascomycota	c__Eurotiomycetes	o__Eurotiales	f__unidentified_Eurotiales	g__unidentified_Eurotiales	s__unidentified_Eurotiales	New.CleanUp.ReferenceOTU37501
OTU4873	0	0	1	0	0	0	1	0	0	0	0	0	2	3	0	2	0	1	0	0	0	0	1	0	0	1	1	1	4	0	0	1	0	0	0	0	k__Fungi	p__Ascomycota	c__Eurotiomycetes	o__Eurotiales	f__unidentified_Eurotiales	g__unidentified_Eurotiales	s__unidentified_Eurotiales	New.CleanUp.ReferenceOTU90079
OTU4937	0	0	0	0	0	0	0	0	0	0	0	0	0	0	0	0	0	0	0	0	0	0	0	0	0	0	1	11	0	0	2	0	0	0	0	0	k__Fungi	p__Ascomycota	c__Eurotiomycetes	o__Eurotiales	f__unidentified_Eurotiales	g__unidentified_Eurotiales	s__unidentified_Eurotiales	New.CleanUp.ReferenceOTU1617
OTU5095	0	0	0	0	0	14	0	0	0	0	0	0	0	0	0	0	0	0	0	0	0	0	0	0	0	0	0	0	0	0	0	0	0	0	0	0	k__Fungi	p__Ascomycota	c__Eurotiomycetes	o__Eurotiales	f__unidentified_Eurotiales	g__unidentified_Eurotiales	s__unidentified_Eurotiales	New.CleanUp.ReferenceOTU14426
OTU4302	0	0	0	0	0	0	0	1	0	0	0	0	0	0	0	0	0	0	10	0	0	0	0	0	0	0	0	0	0	0	0	0	0	0	0	0	k__Fungi	p__Ascomycota	c__Eurotiomycetes	o__Eurotiales	f__unidentified_Eurotiales	g__unidentified_Eurotiales	s__unidentified_Eurotiales	New.CleanUp.ReferenceOTU46658
OTU4714	0	0	0	0	0	0	0	0	0	0	0	0	0	0	0	0	0	0	0	0	0	0	0	0	0	0	0	6	0	0	1	0	0	2	0	2	k__Fungi	p__Ascomycota	c__Eurotiomycetes	o__Eurotiales	f__unidentified_Eurotiales	g__unidentified_Eurotiales	s__unidentified_Eurotiales	New.CleanUp.ReferenceOTU87735
OTU3071	0	0	0	0	0	0	0	0	0	0	0	0	0	0	0	1	0	0	0	0	0	0	0	0	1	0	0	0	1	0	0	1	0	0	0	0	k__Fungi	p__Ascomycota	c__Eurotiomycetes	o__Eurotiales	f__unidentified_Eurotiales	g__unidentified_Eurotiales	s__unidentified_Eurotiales	New.CleanUp.ReferenceOTU60585
OTU2549	0	0	0	0	1	0	0	0	0	0	0	0	0	0	0	0	0	0	0	0	0	0	0	0	0	0	0	0	0	0	0	0	0	0	0	2	k__Fungi	p__Ascomycota	c__Eurotiomycetes	o__Eurotiales	f__unidentified_Eurotiales	g__unidentified_Eurotiales	s__unidentified_Eurotiales	New.CleanUp.ReferenceOTU52104
OTU2618	0	0	0	0	0	0	0	0	0	0	0	0	0	0	0	0	0	1	0	0	0	0	0	0	0	2	0	0	0	0	0	0	0	0	0	0	k__Fungi	p__Ascomycota	c__Eurotiomycetes	o__Eurotiales	f__unidentified_Eurotiales	g__unidentified_Eurotiales	s__unidentified_Eurotiales	New.CleanUp.ReferenceOTU102891
OTU1338	0	0	0	0	0	0	0	0	1	0	0	0	0	0	0	0	0	0	0	1	0	0	0	0	0	0	0	0	0	0	0	0	0	0	0	0	k__Fungi	p__Ascomycota	c__Eurotiomycetes	o__Eurotiales	f__unidentified_Eurotiales	g__unidentified_Eurotiales	s__unidentified_Eurotiales	New.CleanUp.ReferenceOTU25580
OTU1617	0	0	0	0	0	0	0	0	0	0	0	0	0	0	0	0	0	0	0	0	0	0	1	0	0	0	0	0	0	0	0	0	1	0	0	0	k__Fungi	p__Ascomycota	c__Eurotiomycetes	o__Eurotiales	f__unidentified_Eurotiales	g__unidentified_Eurotiales	s__unidentified_Eurotiales	New.CleanUp.ReferenceOTU112922
OTU112	0	0	0	0	0	0	0	0	0	0	0	0	0	0	0	0	0	0	0	0	0	0	0	0	0	0	0	0	0	0	0	0	0	0	0	1	k__Fungi	p__Ascomycota	c__Eurotiomycetes	o__Eurotiales	f__unidentified_Eurotiales	g__unidentified_Eurotiales	s__unidentified_Eurotiales	SH490005.07FU_AB986362_reps
OTU362	0	0	0	0	0	0	0	0	0	0	0	0	0	0	0	0	0	0	0	0	0	0	0	0	0	0	0	1	0	0	0	0	0	0	0	0	k__Fungi	p__Ascomycota	c__Eurotiomycetes	o__Eurotiales	f__unidentified_Eurotiales	g__unidentified_Eurotiales	s__unidentified_Eurotiales	New.CleanUp.ReferenceOTU69912
OTU451	0	0	0	0	0	0	0	0	0	0	0	0	0	0	0	0	0	0	0	0	0	0	0	0	0	0	0	0	0	0	0	0	1	0	0	0	k__Fungi	p__Ascomycota	c__Eurotiomycetes	o__Eurotiales	f__unidentified_Eurotiales	g__unidentified_Eurotiales	s__unidentified_Eurotiales	New.CleanUp.ReferenceOTU97103
OTU485	0	0	0	0	0	0	0	0	0	0	0	0	0	0	0	0	0	0	0	0	0	0	0	0	0	0	1	0	0	0	0	0	0	0	0	0	k__Fungi	p__Ascomycota	c__Eurotiomycetes	o__Eurotiales	f__unidentified_Eurotiales	g__unidentified_Eurotiales	s__unidentified_Eurotiales	New.CleanUp.ReferenceOTU105701
OTU1341	0	0	0	0	0	0	0	0	0	0	0	0	0	0	0	0	0	0	0	0	0	0	0	0	0	0	0	0	1	0	0	0	0	0	0	0	k__Fungi	p__Ascomycota	c__Eurotiomycetes	o__Eurotiales	f__unidentified_Eurotiales	g__unidentified_Eurotiales	s__unidentified_Eurotiales	New.CleanUp.ReferenceOTU25890
OTU1569	0	0	0	0	0	0	0	0	0	0	0	0	0	0	0	0	0	0	0	0	0	0	0	0	0	0	0	1	0	0	0	0	0	0	0	0	k__Fungi	p__Ascomycota	c__Eurotiomycetes	o__Eurotiales	f__unidentified_Eurotiales	g__unidentified_Eurotiales	s__unidentified_Eurotiales	New.CleanUp.ReferenceOTU98667
OTU4580	0	0	0	0	0	2	0	0	0	0	0	0	0	0	0	0	0	0	0	0	0	0	0	0	0	0	0	0	0	0	0	0	0	0	0	0	k__Fungi	p__Ascomycota	c__Eurotiomycetes	o__Onygenales	f__unidentified_Onygenales	g__unidentified_Onygenales	s__unidentified_Onygenales	SH017427.07FU_KC894838_reps_singleton
OTU3406	0	0	0	0	0	0	0	0	0	0	0	0	0	0	0	0	0	0	0	0	0	0	0	0	0	0	0	0	0	0	0	0	0	0	5	0	k__Fungi	p__Ascomycota	c__Eurotiomycetes	o__Onygenales	f__Ajellomycetaceae	g__Spiromastix	s__unidentified_Spiromastix	New.CleanUp.ReferenceOTU68860
OTU2438	0	0	0	0	0	0	0	1	0	0	0	0	0	0	0	0	0	0	0	0	0	0	0	0	0	0	0	0	0	0	0	0	0	0	0	0	k__Fungi	p__Ascomycota	c__Eurotiomycetes	o__Onygenales	f__Ajellomycetaceae	g__Emmonsia	s__unidentified_Emmonsia	SH016176.07FU_JQ247333_reps
OTU5064	0	0	0	6	0	0	0	3	0	0	0	0	0	0	5	0	0	3	0	0	0	0	0	0	1	0	0	0	2	0	0	1	0	3	0	0	k__Fungi	p__Ascomycota	c__Eurotiomycetes	o__Onygenales	f__Arthrodermataceae	g__Arthroderma	s__unidentified_Arthroderma	SH007605.07FU_AJ000606_refs
OTU3921	0	0	0	0	0	0	0	0	0	0	0	0	0	0	0	0	0	0	0	0	0	0	0	0	4	0	0	0	0	2	0	0	0	0	0	0	k__Fungi	p__Ascomycota	c__Eurotiomycetes	o__Onygenales	f__Arthrodermataceae	g__Arthroderma	s__unidentified_Arthroderma	SH004066.07FU_AB193713_reps
OTU2503	0	0	0	0	0	0	0	0	0	0	0	0	0	0	0	0	0	1	0	0	0	0	0	0	0	0	2	0	0	0	0	0	0	0	0	0	k__Fungi	p__Ascomycota	c__Eurotiomycetes	o__Onygenales	f__Arthrodermataceae	g__Arthroderma	s__unidentified_Arthroderma	New.CleanUp.ReferenceOTU23130
OTU2968	0	3	0	0	0	0	0	0	0	0	0	0	0	0	0	0	0	0	0	0	0	0	0	0	0	0	0	0	0	0	0	0	0	0	0	0	k__Fungi	p__Ascomycota	c__Eurotiomycetes	o__Onygenales	f__Arthrodermataceae	g__Arthroderma	s__unidentified_Arthroderma	SH491500.07FU_KP691487_reps_singleton
OTU3603	0	0	6	0	0	0	0	0	0	0	0	0	0	0	0	0	0	0	0	0	0	0	0	0	0	0	0	0	0	0	0	0	0	0	0	0	k__Fungi	p__Ascomycota	c__Eurotiomycetes	o__Onygenales	f__Arthrodermataceae	g__Arthroderma	s__Arthroderma_curreyi	SH011748.07FU_AJ877223_refs
OTU399	0	0	0	0	0	0	1	0	0	0	0	0	0	0	0	0	0	0	0	0	0	0	0	0	0	0	0	0	0	0	0	0	0	0	0	0	k__Fungi	p__Ascomycota	c__Eurotiomycetes	o__Onygenales	f__Arthrodermataceae	g__Arthroderma	s__Arthroderma_curreyi	New.CleanUp.ReferenceOTU79258
OTU6152	0	0	0	0	0	5	22	2	4	0	3	0	51	0	0	0	13	2	10	6	17	0	31	8	0	0	0	0	0	0	0	0	0	0	0	0	k__Fungi	p__Ascomycota	c__Eurotiomycetes	o__Onygenales	f__Arthrodermataceae	g__Keratinomyces	s__Keratinomyces_ceretanicus	New.CleanUp.ReferenceOTU118686
OTU3777	0	0	0	0	0	2	3	0	0	0	0	0	0	0	0	0	0	0	1	0	0	0	0	0	1	0	0	0	0	0	0	0	0	0	0	0	k__Fungi	p__Ascomycota	c__Eurotiomycetes	o__Onygenales	f__Arthrodermataceae	g__Keratinomyces	s__Keratinomyces_ceretanicus	SH457714.07FU_AJ877224_reps_singleton
OTU2606	0	0	0	0	1	0	0	0	0	0	0	0	0	0	0	0	0	0	2	0	0	0	0	0	0	0	0	0	0	0	0	0	0	0	0	0	k__Fungi	p__Ascomycota	c__Eurotiomycetes	o__Onygenales	f__Arthrodermataceae	g__Keratinomyces	s__Keratinomyces_ceretanicus	New.CleanUp.ReferenceOTU93451
OTU5342	0	0	2	0	0	5	4	0	0	0	0	0	0	11	0	0	0	0	7	0	0	0	0	0	0	0	0	0	0	0	0	0	0	0	0	0	k__Fungi	p__Ascomycota	c__Eurotiomycetes	o__Onygenales	f__Arthrodermataceae	g__Trichophyton	s__Trichophyton_ajelloi	SH007597.07FU_AJ000607_refs
OTU4900	0	0	0	0	0	0	0	0	0	0	0	0	0	0	0	0	0	0	0	0	0	0	0	0	1	4	0	0	1	5	0	6	0	0	0	0	k__Fungi	p__Ascomycota	c__Eurotiomycetes	o__Onygenales	f__Arthrodermataceae	g__Trichophyton	s__unidentified_Trichophyton	New.CleanUp.ReferenceOTU50991
OTU3593	0	0	0	0	0	1	0	0	0	0	0	0	0	0	0	0	0	0	0	0	0	0	0	0	0	4	0	0	0	0	1	0	0	0	0	0	k__Fungi	p__Ascomycota	c__Eurotiomycetes	o__Onygenales	f__Gymnoascaceae	g__Gymnoascus	s__Gymnoascus_reessii	SH017648.07FU_GQ376102_refs
OTU3635	0	0	1	0	0	0	0	0	0	0	0	0	0	0	0	0	0	0	0	0	0	0	0	0	0	0	0	0	0	0	0	0	0	0	0	0	k__Fungi	p__Ascomycota	c__Eurotiomycetes	o__Onygenales	f__Gymnoascaceae	g__Testudomyces	s__Testudomyces_verrucosus	New.CleanUp.ReferenceOTU82270
OTU6177	0	0	15	0	0	2	0	2	0	4	4	0	0	12	0	14	3	4	4	0	0	0	3	0	17	1	0	0	11	21	5	0	9	22	11	5	k__Fungi	p__Ascomycota	c__Eurotiomycetes	o__Onygenales	f__Onygenaceae	g__unidentified_Onygenaceae	s__unidentified_Onygenaceae	New.CleanUp.ReferenceOTU777
OTU5088	0	0	0	0	0	0	0	0	0	0	0	0	0	0	0	0	0	2	0	0	0	0	0	0	3	0	0	0	10	0	0	1	0	0	0	0	k__Fungi	p__Ascomycota	c__Eurotiomycetes	o__Onygenales	f__Onygenaceae	g__unidentified_Onygenaceae	s__unidentified_Onygenaceae	SH012490.07FU_AB861811_reps
OTU3590	0	0	1	0	0	0	2	2	0	0	0	0	0	0	0	0	0	0	0	0	0	0	0	0	0	0	0	1	0	0	0	0	0	0	0	0	k__Fungi	p__Ascomycota	c__Eurotiomycetes	o__Onygenales	f__Onygenaceae	g__unidentified_Onygenaceae	s__unidentified_Onygenaceae	SH015539.07FU_AJ131686_reps_singleton
OTU1309	0	0	0	0	0	0	2	0	0	0	0	0	0	0	0	0	0	0	0	0	0	0	0	0	0	0	0	0	0	0	0	0	0	0	0	0	k__Fungi	p__Ascomycota	c__Eurotiomycetes	o__Onygenales	f__Onygenaceae	g__unidentified_Onygenaceae	s__unidentified_Onygenaceae	New.CleanUp.ReferenceOTU15578
OTU6803	179	45	27	41	2	5	26	5	9	5	7	11	143	147	107	33	24	21	140	71	89	83	41	19	0	0	0	0	0	24	0	0	1	11	0	0	k__Fungi	p__Ascomycota	c__Eurotiomycetes	o__Onygenales	f__Onygenaceae	g__Amauroascus	s__Amauroascus_albicans	SH008482.07FU_KF477239_refs_singleton
OTU6949	0	0	22	106	31	24	97	106	52	60	10	14	311	82	4	7	17	66	91	13	52	18	171	0	4	32	64	124	4	144	12	29	524	975	405	655	k__Fungi	p__Ascomycota	c__Eurotiomycetes	o__Onygenales	f__Onygenaceae	g__Auxarthron	s__unidentified_Auxarthron	SH017420.07FU_AY177309_refs
OTU6857	0	0	8	5	6	0	0	34	0	5	0	0	438	241	18	24	0	7	996	123	6	31	26	0	0	0	0	0	0	0	0	0	2	0	0	0	k__Fungi	p__Ascomycota	c__Eurotiomycetes	o__Onygenales	f__Onygenaceae	g__Auxarthron	s__unidentified_Auxarthron	New.ReferenceOTU424
OTU6591	32	10	7	69	8	3	20	4	5	1	0	0	51	41	15	15	5	4	165	15	0	0	1	0	0	5	0	0	8	2	0	3	0	0	0	0	k__Fungi	p__Ascomycota	c__Eurotiomycetes	o__Onygenales	f__Onygenaceae	g__Auxarthron	s__unidentified_Auxarthron	New.ReferenceOTU606
OTU5770	0	0	6	2	0	0	2	2	0	0	0	0	7	11	0	0	1	2	30	7	0	0	0	0	0	0	0	0	1	0	0	3	0	0	0	0	k__Fungi	p__Ascomycota	c__Eurotiomycetes	o__Onygenales	f__Onygenaceae	g__Auxarthron	s__unidentified_Auxarthron	SH017431.07FU_JX270416_reps_singleton
OTU4583	0	0	0	0	0	0	8	0	0	0	0	0	0	0	0	0	0	0	0	0	0	0	0	0	0	0	0	0	0	0	0	0	1	6	0	0	k__Fungi	p__Ascomycota	c__Eurotiomycetes	o__Onygenales	f__Onygenaceae	g__Auxarthron	s__unidentified_Auxarthron	New.CleanUp.ReferenceOTU101
OTU100	0	0	0	0	0	0	0	0	0	0	0	0	0	0	0	0	0	0	0	0	0	0	0	0	0	0	0	0	0	1	0	0	0	0	0	0	k__Fungi	p__Ascomycota	c__Eurotiomycetes	o__Onygenales	f__Onygenaceae	g__Auxarthron	s__unidentified_Auxarthron	SH017423.07FU_AY177305_refs
OTU5841	12	0	3	0	0	0	0	0	0	0	0	0	0	13	24	3	0	0	6	8	0	0	6	0	0	0	0	0	0	0	0	0	0	0	0	0	k__Fungi	p__Ascomycota	c__Eurotiomycetes	o__Onygenales	f__Onygenaceae	g__Auxarthron	s__Auxarthron_californiense	New.CleanUp.ReferenceOTU16172
OTU4924	0	0	0	0	0	0	0	0	0	0	0	0	0	0	0	0	0	0	0	0	0	0	0	0	2	0	1	0	15	0	0	2	0	0	0	0	k__Fungi	p__Ascomycota	c__Eurotiomycetes	o__Onygenales	f__Onygenaceae	g__Auxarthron	s__Auxarthron_californiense	SH026061.07FU_AF038352_refs_singleton
OTU3820	0	0	0	0	0	3	0	0	0	0	0	0	0	0	0	0	0	0	0	0	0	0	0	0	0	0	0	0	1	3	0	0	0	0	0	0	k__Fungi	p__Ascomycota	c__Eurotiomycetes	o__Onygenales	f__Onygenaceae	g__Auxarthron	s__Auxarthron_californiense	New.CleanUp.ReferenceOTU111015
OTU4383	0	0	0	0	0	0	0	0	1	0	0	0	0	0	0	2	0	0	0	0	0	0	0	0	0	0	0	0	0	0	0	0	0	0	0	0	k__Fungi	p__Ascomycota	c__Eurotiomycetes	o__Onygenales	f__Onygenaceae	g__Auxarthron	s__Auxarthron_californiense	New.CleanUp.ReferenceOTU50224
OTU3625	0	0	0	0	0	0	2	0	0	0	0	0	0	0	0	0	0	0	0	0	0	0	0	0	0	0	0	0	0	0	0	0	0	0	0	0	k__Fungi	p__Ascomycota	c__Eurotiomycetes	o__Onygenales	f__Onygenaceae	g__Auxarthron	s__Auxarthron_californiense	New.CleanUp.ReferenceOTU61328
OTU5163	0	0	0	0	0	0	0	0	0	0	0	0	0	0	0	0	0	0	0	0	0	0	0	0	0	0	0	0	0	0	0	0	18	0	4	9	k__Fungi	p__Ascomycota	c__Eurotiomycetes	o__Onygenales	f__Onygenaceae	g__Auxarthron	s__Auxarthron_concentricum	SH495290.07FU_KP636438_reps_singleton
OTU6373	0	0	0	0	0	3	2	0	22	13	7	16	0	0	0	0	4	6	0	3	65	0	0	0	0	0	0	0	0	0	0	0	6	11	71	50	k__Fungi	p__Ascomycota	c__Eurotiomycetes	o__Onygenales	f__Onygenaceae	g__Auxarthron	s__unidentified_Auxarthron	New.ReferenceOTU24
OTU5359	0	0	0	0	0	0	0	0	0	0	0	0	8	0	0	0	0	0	0	0	0	0	0	0	0	0	0	0	0	0	0	0	8	7	1	2	k__Fungi	p__Ascomycota	c__Eurotiomycetes	o__Onygenales	f__Onygenaceae	g__Auxarthron	s__unidentified_Auxarthron	SH030864.07FU_GQ921794_reps
OTU3958	0	6	0	2	0	0	0	0	0	0	0	0	0	0	0	0	0	0	0	0	0	0	0	0	0	0	0	0	0	0	0	0	0	0	0	0	k__Fungi	p__Ascomycota	c__Eurotiomycetes	o__Onygenales	f__Onygenaceae	g__Chrysosporium	s__unidentified_Chrysosporium	New.CleanUp.ReferenceOTU36718
OTU2520	0	0	0	0	0	0	0	0	0	0	0	0	0	0	0	0	0	3	0	0	0	0	0	0	0	0	0	0	0	0	0	0	0	0	0	0	k__Fungi	p__Ascomycota	c__Eurotiomycetes	o__Onygenales	f__Onygenaceae	g__Chrysosporium	s__unidentified_Chrysosporium	New.CleanUp.ReferenceOTU29141
OTU4183	0	0	0	0	0	0	0	0	0	0	0	0	0	0	0	0	0	1	0	0	0	0	0	0	0	0	0	0	0	9	0	0	0	0	0	0	k__Fungi	p__Ascomycota	c__Eurotiomycetes	o__Onygenales	f__Onygenaceae	g__Chrysosporium	s__unidentified_Chrysosporium	New.ReferenceOTU541
OTU3338	0	0	0	0	0	1	4	0	0	0	0	0	0	0	0	0	0	0	0	0	0	0	0	0	0	0	0	0	0	0	0	0	0	0	0	0	k__Fungi	p__Ascomycota	c__Eurotiomycetes	o__Onygenales	f__Onygenaceae	g__Chrysosporium	s__Chrysosporium_undulatum	SH003354.07FU_AJ007845_reps
OTU73	0	0	0	0	0	0	0	0	0	0	0	0	0	0	0	0	1	0	0	0	0	0	0	0	0	0	0	0	0	0	0	0	0	0	0	0	k__Fungi	p__Ascomycota	c__Eurotiomycetes	o__Onygenales	f__Onygenaceae	g__Chrysosporium	s__Chrysosporium_vallenarense	SH014369.07FU_KC008883_reps
OTU4832	0	0	1	0	0	0	0	0	0	0	0	0	0	0	0	0	0	0	0	0	0	1	2	6	0	0	0	0	0	0	0	0	0	0	0	0	k__Fungi	p__Ascomycota	c__Eurotiomycetes	o__Onygenales	f__Onygenaceae	g__Mallochia	s__Mallochia_reticulata	New.CleanUp.ReferenceOTU55264
OTU5563	0	0	0	25	0	0	0	29	0	0	0	0	0	0	0	0	0	0	0	0	0	0	0	0	0	0	0	0	0	0	0	0	0	0	0	0	k__Fungi	p__Ascomycota	c__Eurotiomycetes	o__Onygenales	f__Onygenaceae	g__unidentified_Onygenaceae	s__unidentified_Onygenaceae	New.CleanUp.ReferenceOTU70563
OTU3775	0	0	0	0	0	0	0	0	0	0	0	0	0	0	0	0	0	0	0	0	0	0	0	7	0	0	0	0	0	0	0	0	0	0	0	0	k__Fungi	p__Ascomycota	c__Eurotiomycetes	o__Onygenales	f__Onygenaceae	g__unidentified_Onygenaceae	s__unidentified_Onygenaceae	SH030119.07FU_JF927025_reps_singleton
OTU1236	0	0	0	0	0	0	0	0	0	0	0	2	0	0	0	0	0	0	0	0	0	0	0	0	0	0	0	0	0	0	0	0	0	0	0	0	k__Fungi	p__Ascomycota	c__Eurotiomycetes	o__Onygenales	f__Onygenales_fam_Incertae_sedis	g__Myceliophthora	s__	SH013923.07FU_KP132478_refs
OTU6848	184	5	0	41	0	0	147	60	0	0	0	29	586	0	0	0	0	0	0	0	344	578	155	3	0	0	0	0	0	0	0	0	0	0	0	0	k__Fungi	p__Ascomycota	c__Eurotiomycetes	o__Onygenales	f__unidentified_Onygenales	g__unidentified_Onygenales	s__unidentified_Onygenales	New.ReferenceOTU796
OTU6833	0	0	0	0	0	0	12	0	6	13	1200	271	0	0	0	0	0	0	0	0	0	0	403	0	0	0	0	0	0	0	0	0	0	0	0	0	k__Fungi	p__Ascomycota	c__Eurotiomycetes	o__Onygenales	f__unidentified_Onygenales	g__unidentified_Onygenales	s__unidentified_Onygenales	New.ReferenceOTU173
OTU6714	0	0	0	5	0	0	0	517	0	0	0	0	285	0	0	0	0	0	0	0	114	12	1	63	0	0	0	0	0	0	0	0	0	0	0	0	k__Fungi	p__Ascomycota	c__Eurotiomycetes	o__Onygenales	f__unidentified_Onygenales	g__unidentified_Onygenales	s__unidentified_Onygenales	New.ReferenceOTU490
OTU6679	4	0	0	24	0	0	0	17	0	0	0	0	807	0	0	0	0	0	0	0	10	0	0	2	0	0	0	0	0	0	0	0	0	0	0	0	k__Fungi	p__Ascomycota	c__Eurotiomycetes	o__Onygenales	f__unidentified_Onygenales	g__unidentified_Onygenales	s__unidentified_Onygenales	SH030115.07FU_JF926926_reps
OTU5119	0	0	0	0	0	0	0	0	0	0	0	0	0	0	0	0	0	0	0	0	0	0	0	29	0	0	0	0	0	0	0	0	0	0	0	0	k__Fungi	p__Ascomycota	c__Eurotiomycetes	o__Onygenales	f__unidentified_Onygenales	g__unidentified_Onygenales	s__unidentified_Onygenales	New.CleanUp.ReferenceOTU44664
OTU4573	0	0	0	0	0	0	0	0	0	0	0	0	0	0	0	0	0	0	0	0	0	0	0	15	0	0	0	0	0	0	0	0	0	0	0	0	k__Fungi	p__Ascomycota	c__Eurotiomycetes	o__Onygenales	f__unidentified_Onygenales	g__unidentified_Onygenales	s__unidentified_Onygenales	SH030116.07FU_JF926930_reps
OTU4394	0	0	0	0	0	0	3	0	0	0	5	4	0	0	0	0	0	0	0	0	0	0	0	0	0	0	0	0	0	0	0	0	0	0	0	0	k__Fungi	p__Ascomycota	c__Eurotiomycetes	o__Onygenales	f__unidentified_Onygenales	g__unidentified_Onygenales	s__unidentified_Onygenales	New.CleanUp.ReferenceOTU85630
OTU3972	0	0	0	0	0	0	0	0	0	0	0	0	0	0	0	0	0	0	0	0	0	8	0	0	0	0	0	0	0	0	0	0	0	0	0	0	k__Fungi	p__Ascomycota	c__Eurotiomycetes	o__Onygenales	f__unidentified_Onygenales	g__unidentified_Onygenales	s__unidentified_Onygenales	New.CleanUp.ReferenceOTU80549
OTU3375	0	0	0	0	0	0	0	0	0	0	0	0	0	0	0	0	0	0	0	0	0	0	0	5	0	0	0	0	0	0	0	0	0	0	0	0	k__Fungi	p__Ascomycota	c__Eurotiomycetes	o__Onygenales	f__unidentified_Onygenales	g__unidentified_Onygenales	s__unidentified_Onygenales	New.CleanUp.ReferenceOTU22069
OTU3041	0	0	0	0	0	0	0	0	0	0	2	1	0	0	0	0	0	0	0	0	0	0	1	0	0	0	0	0	0	0	0	0	0	0	0	0	k__Fungi	p__Ascomycota	c__Eurotiomycetes	o__Onygenales	f__unidentified_Onygenales	g__unidentified_Onygenales	s__unidentified_Onygenales	New.CleanUp.ReferenceOTU28869
OTU3396	0	0	0	0	0	0	0	0	0	0	0	0	0	0	0	0	0	0	0	0	0	0	0	3	0	0	0	0	0	0	0	0	0	0	0	0	k__Fungi	p__Ascomycota	c__Eurotiomycetes	o__Onygenales	f__unidentified_Onygenales	g__unidentified_Onygenales	s__unidentified_Onygenales	New.CleanUp.ReferenceOTU54442
OTU4859	0	0	0	0	0	0	0	0	0	0	0	0	0	0	0	0	0	0	0	0	0	0	0	3	0	0	0	0	0	0	0	0	0	0	0	0	k__Fungi	p__Ascomycota	c__Eurotiomycetes	o__Onygenales	f__unidentified_Onygenales	g__unidentified_Onygenales	s__unidentified_Onygenales	SH027573.07FU_HG327875_reps
OTU3352	0	0	0	0	0	0	0	0	0	0	0	0	0	0	0	0	0	0	0	0	0	0	0	0	0	0	0	0	0	0	0	0	1	0	0	0	k__Fungi	p__Ascomycota	c__Eurotiomycetes	o__Onygenales	f__unidentified_Onygenales	g__unidentified_Onygenales	s__unidentified_Onygenales	SH015712.07FU_HG327917_reps
OTU6504	8	0	0	0	0	0	0	25	0	0	0	0	14	0	0	0	0	0	0	0	106	12	12	245	0	0	0	0	0	0	0	0	0	0	0	0	k__Fungi	p__Ascomycota	c__Eurotiomycetes	o__unidentified_Eurotiomycetes	f__unidentified_Eurotiomycetes	g__unidentified_Eurotiomycetes	s__unidentified_Eurotiomycetes	New.ReferenceOTU849
OTU6437	27	8	12	7	0	4	7	9	1	0	0	0	21	22	34	9	4	18	26	5	0	3	2	0	2	0	0	0	2	0	0	0	9	4	34	6	k__Fungi	p__Ascomycota	c__Eurotiomycetes	o__unidentified_Eurotiomycetes	f__unidentified_Eurotiomycetes	g__unidentified_Eurotiomycetes	s__unidentified_Eurotiomycetes	New.ReferenceOTU484
OTU6455	0	0	8	0	0	4	6	3	5	0	0	0	13	5	2	0	0	12	0	8	0	0	0	0	4	15	18	9	60	33	8	17	6	32	5	0	k__Fungi	p__Ascomycota	c__Eurotiomycetes	o__unidentified_Eurotiomycetes	f__unidentified_Eurotiomycetes	g__unidentified_Eurotiomycetes	s__unidentified_Eurotiomycetes	New.ReferenceOTU172
OTU6285	0	0	0	0	0	0	0	0	0	4	0	0	0	0	0	1	0	0	0	0	0	0	0	0	0	0	0	0	11	0	0	0	0	13	163	55	k__Fungi	p__Ascomycota	c__Eurotiomycetes	o__unidentified_Eurotiomycetes	f__unidentified_Eurotiomycetes	g__unidentified_Eurotiomycetes	s__unidentified_Eurotiomycetes	SH008808.07FU_DQ069043_reps
OTU6345	1	5	4	0	0	0	0	5	3	0	0	0	0	45	33	9	0	0	22	15	52	6	16	0	0	0	0	0	0	0	0	0	17	1	0	0	k__Fungi	p__Ascomycota	c__Eurotiomycetes	o__unidentified_Eurotiomycetes	f__unidentified_Eurotiomycetes	g__unidentified_Eurotiomycetes	s__unidentified_Eurotiomycetes	New.ReferenceOTU6
OTU6106	0	0	0	0	0	0	4	5	0	0	3	0	0	0	0	0	0	0	0	0	20	15	112	0	0	0	0	0	0	0	0	0	0	0	0	0	k__Fungi	p__Ascomycota	c__Eurotiomycetes	o__unidentified_Eurotiomycetes	f__unidentified_Eurotiomycetes	g__unidentified_Eurotiomycetes	s__unidentified_Eurotiomycetes	New.CleanUp.ReferenceOTU72320
OTU5486	0	0	0	0	0	0	1	0	0	0	0	0	32	1	0	0	0	0	0	0	14	0	0	0	0	0	0	0	0	0	0	0	0	0	0	0	k__Fungi	p__Ascomycota	c__Eurotiomycetes	o__unidentified_Eurotiomycetes	f__unidentified_Eurotiomycetes	g__unidentified_Eurotiomycetes	s__unidentified_Eurotiomycetes	New.CleanUp.ReferenceOTU43683
OTU4766	0	0	0	0	0	0	0	0	0	0	0	0	0	0	0	0	0	0	0	0	0	0	0	0	0	0	0	0	0	0	0	1	0	0	17	0	k__Fungi	p__Ascomycota	c__Eurotiomycetes	o__unidentified_Eurotiomycetes	f__unidentified_Eurotiomycetes	g__unidentified_Eurotiomycetes	s__unidentified_Eurotiomycetes	New.CleanUp.ReferenceOTU95777
OTU4829	7	0	1	0	0	0	0	0	0	0	0	0	0	0	2	2	1	0	0	0	2	0	0	0	0	0	0	0	0	0	0	0	0	0	0	0	k__Fungi	p__Ascomycota	c__Eurotiomycetes	o__unidentified_Eurotiomycetes	f__unidentified_Eurotiomycetes	g__unidentified_Eurotiomycetes	s__unidentified_Eurotiomycetes	New.CleanUp.ReferenceOTU1438
OTU3022	0	0	0	0	0	0	0	0	0	0	0	0	0	0	2	0	0	0	0	0	0	0	0	0	0	1	0	1	0	0	0	0	0	0	0	0	k__Fungi	p__Ascomycota	c__Eurotiomycetes	o__unidentified_Eurotiomycetes	f__unidentified_Eurotiomycetes	g__unidentified_Eurotiomycetes	s__unidentified_Eurotiomycetes	New.CleanUp.ReferenceOTU10329
OTU2454	0	0	0	0	0	0	0	0	0	3	0	0	0	0	0	0	0	0	0	0	0	0	0	0	0	0	0	0	0	0	0	0	0	0	0	0	k__Fungi	p__Ascomycota	c__Eurotiomycetes	o__unidentified_Eurotiomycetes	f__unidentified_Eurotiomycetes	g__unidentified_Eurotiomycetes	s__unidentified_Eurotiomycetes	SH017324.07FU_EF040864_reps
OTU2563	1	0	0	0	0	0	0	1	0	0	0	0	0	0	0	0	0	0	0	0	0	0	0	0	0	0	0	0	0	0	0	0	0	0	0	0	k__Fungi	p__Ascomycota	c__Eurotiomycetes	o__unidentified_Eurotiomycetes	f__unidentified_Eurotiomycetes	g__unidentified_Eurotiomycetes	s__unidentified_Eurotiomycetes	New.CleanUp.ReferenceOTU63858
OTU6182	0	0	0	3	0	0	0	0	0	0	0	0	80	0	0	0	0	0	0	0	28	76	3	4	0	0	0	0	0	0	0	0	0	0	0	0	k__Fungi	p__Ascomycota	c__Geoglossomycetes	o__Geoglossales	f__unidentified_Geoglossales	g__unidentified_Geoglossales	s__unidentified_Geoglossales	SH012448.07FU_GQ219930_reps
OTU6307	0	0	0	0	0	0	259	0	0	0	0	0	0	0	0	0	0	0	0	0	0	0	0	0	0	0	0	0	0	0	0	0	0	0	0	0	k__Fungi	p__Ascomycota	c__Geoglossomycetes	o__Geoglossales	f__Geoglossaceae	g__Geoglossum	s__Geoglossum_fallax	SH017958.07FU_JQ256419_reps
OTU6200	0	0	0	0	0	0	0	0	0	195	6	0	0	0	0	0	0	0	0	0	0	0	0	0	0	0	0	0	0	0	0	0	0	0	0	0	k__Fungi	p__Ascomycota	c__Geoglossomycetes	o__Geoglossales	f__Geoglossaceae	g__Geoglossum	s__unidentified_Geoglossum	New.ReferenceOTU390
OTU1348	0	0	0	0	0	0	0	0	0	0	0	0	0	0	0	0	0	0	0	2	0	0	0	0	0	0	0	0	0	0	0	0	0	0	0	0	k__Fungi	p__Ascomycota	c__Geoglossomycetes	o__Geoglossales	f__Geoglossaceae	g__Maasoglossum	s__unidentified_Maasoglossum	New.CleanUp.ReferenceOTU28626
OTU6891	0	0	0	0	0	0	0	0	0	0	0	0	0	0	0	0	0	0	0	0	1102	1720	12	3	0	0	0	0	0	0	0	0	0	0	0	0	k__Fungi	p__Ascomycota	c__Geoglossomycetes	o__Geoglossales	f__Geoglossaceae	g__Trichoglossum	s__unidentified_Trichoglossum	New.ReferenceOTU313
OTU6613	0	0	0	0	0	0	0	0	0	0	0	0	0	1	0	0	0	0	0	0	1	0	604	7	0	0	0	0	0	0	0	0	0	0	0	0	k__Fungi	p__Ascomycota	c__Geoglossomycetes	o__Geoglossales	f__Geoglossaceae	g__Trichoglossum	s__unidentified_Trichoglossum	SH004681.07FU_AY970112_reps
OTU4284	0	0	0	0	0	0	0	0	0	0	0	0	0	0	0	0	0	0	0	0	0	0	0	11	0	0	0	0	0	0	0	0	0	0	0	0	k__Fungi	p__Ascomycota	c__Geoglossomycetes	o__Geoglossales	f__Geoglossaceae	g__Trichoglossum	s__Trichoglossum_hirsutum	SH017620.07FU_UDB018075_reps
OTU6594	0	0	0	0	0	0	0	0	0	0	0	0	475	0	0	0	0	0	1	94	0	0	0	0	0	0	0	0	0	0	0	0	0	0	0	0	k__Fungi	p__Ascomycota	c__Lecanoromycetes	o__unidentified_Lecanoromycetes	f__unidentified_Lecanoromycetes	g__unidentified_Lecanoromycetes	s__unidentified_Lecanoromycetes	SH027893.07FU_KF617784_reps_singleton
OTU5927	0	0	0	0	1	0	0	25	66	10	0	0	6	0	0	0	0	0	0	0	0	0	0	0	0	0	0	0	0	0	0	0	0	0	0	0	k__Fungi	p__Ascomycota	c__Lecanoromycetes	o__unidentified_Lecanoromycetes	f__unidentified_Lecanoromycetes	g__unidentified_Lecanoromycetes	s__unidentified_Lecanoromycetes	SH027886.07FU_HM239886_reps
OTU5430	0	0	0	0	1	0	0	0	0	0	0	0	0	0	0	0	0	0	0	0	0	0	0	0	0	0	0	0	0	0	0	0	27	0	7	7	k__Fungi	p__Ascomycota	c__Lecanoromycetes	o__unidentified_Lecanoromycetes	f__unidentified_Lecanoromycetes	g__unidentified_Lecanoromycetes	s__unidentified_Lecanoromycetes	New.CleanUp.ReferenceOTU74691
OTU1382	0	0	0	0	0	0	0	0	0	0	0	0	2	0	0	0	0	0	0	0	0	0	0	0	0	0	0	0	0	0	0	0	0	0	0	0	k__Fungi	p__Ascomycota	c__Lecanoromycetes	o__unidentified_Lecanoromycetes	f__unidentified_Lecanoromycetes	g__unidentified_Lecanoromycetes	s__unidentified_Lecanoromycetes	New.CleanUp.ReferenceOTU42713
OTU1572	0	0	0	0	0	0	0	0	0	0	0	0	2	0	0	0	0	0	0	0	0	0	0	0	0	0	0	0	0	0	0	0	0	0	0	0	k__Fungi	p__Ascomycota	c__Lecanoromycetes	o__unidentified_Lecanoromycetes	f__unidentified_Lecanoromycetes	g__unidentified_Lecanoromycetes	s__unidentified_Lecanoromycetes	New.CleanUp.ReferenceOTU98770
OTU6044	0	0	0	0	0	0	0	0	0	0	0	0	0	0	0	0	0	0	0	0	0	0	0	0	0	1	12	0	0	2	0	35	0	0	0	0	k__Fungi	p__Ascomycota	c__Lecanoromycetes	o__unidentified_Lecanoromycetes	f__unidentified_Lecanoromycetes	g__unidentified_Lecanoromycetes	s__unidentified_Lecanoromycetes	New.CleanUp.ReferenceOTU84949
OTU5298	0	0	0	0	0	0	0	0	0	0	0	0	0	0	0	0	0	0	0	0	0	0	0	0	0	0	0	36	0	0	1	0	0	0	0	0	k__Fungi	p__Ascomycota	c__Lecanoromycetes	o__unidentified_Lecanoromycetes	f__unidentified_Lecanoromycetes	g__unidentified_Lecanoromycetes	s__unidentified_Lecanoromycetes	SH027885.07FU_JF300535_reps
OTU3762	0	7	0	0	0	0	0	0	0	0	0	0	0	0	0	0	0	0	0	0	0	0	0	0	0	0	0	0	0	0	0	0	0	0	0	0	k__Fungi	p__Ascomycota	c__Lecanoromycetes	o__unidentified_Lecanoromycetes	f__unidentified_Lecanoromycetes	g__unidentified_Lecanoromycetes	s__unidentified_Lecanoromycetes	SH470811.07FU_AB517730_reps_singleton
OTU3117	0	0	0	0	0	0	0	0	0	0	0	4	0	0	0	0	0	0	0	0	0	0	0	0	0	0	0	0	0	0	0	0	0	0	0	0	k__Fungi	p__Ascomycota	c__Lecanoromycetes	o__unidentified_Lecanoromycetes	f__unidentified_Lecanoromycetes	g__unidentified_Lecanoromycetes	s__unidentified_Lecanoromycetes	New.CleanUp.ReferenceOTU104677
OTU226	0	0	0	0	0	0	0	0	0	0	0	0	0	0	0	0	0	0	0	0	0	0	0	0	0	0	0	1	0	0	0	0	0	0	0	0	k__Fungi	p__Ascomycota	c__Lecanoromycetes	o__unidentified_Lecanoromycetes	f__unidentified_Lecanoromycetes	g__unidentified_Lecanoromycetes	s__unidentified_Lecanoromycetes	New.CleanUp.ReferenceOTU24777
OTU4112	0	0	0	0	0	0	0	0	0	0	0	9	0	0	0	0	0	0	0	0	0	0	0	0	0	0	0	0	0	0	0	0	0	0	0	0	k__Fungi	p__Ascomycota	c__Lecanoromycetes	o__Lecanorales	f__unidentified_Lecanorales	g__unidentified_Lecanorales	s__unidentified_Lecanorales	New.CleanUp.ReferenceOTU114409
OTU1227	0	0	0	0	0	0	0	0	0	0	0	2	0	0	0	0	0	0	0	0	0	0	0	0	0	0	0	0	0	0	0	0	0	0	0	0	k__Fungi	p__Ascomycota	c__Lecanoromycetes	o__Lecanorales	f__unidentified_Lecanorales	g__unidentified_Lecanorales	s__unidentified_Lecanorales	SH473114.07FU_HQ021888_reps_singleton
OTU81	0	0	0	1	0	0	0	0	0	0	0	0	0	0	0	0	0	0	0	0	0	0	0	0	0	0	0	0	0	0	0	0	0	0	0	0	k__Fungi	p__Ascomycota	c__Lecanoromycetes	o__Lecanorales	f__Lecanorales_fam_Incertae_sedis	g__Scoliciosporum	s__Scoliciosporum_chlorococcum	SH460262.07FU_FR799323_reps_singleton
OTU262	0	0	0	0	0	0	0	0	0	0	1	0	0	0	0	0	0	0	0	0	0	0	0	0	0	0	0	0	0	0	0	0	0	0	0	0	k__Fungi	p__Ascomycota	c__Lecanoromycetes	o__Lecanorales	f__Stereocaulaceae	g__Lepraria	s__Lepraria_incana	New.CleanUp.ReferenceOTU36811
OTU4582	0	0	0	0	0	0	0	0	0	0	0	0	0	1	0	0	0	2	0	0	0	0	0	0	2	0	0	0	0	1	0	0	0	0	0	0	k__Fungi	p__Ascomycota	c__Lecanoromycetes	o__Ostropales	f__unidentified_Ostropales	g__unidentified_Ostropales	s__unidentified_Ostropales	New.ReferenceOTU77
OTU2986	0	0	4	0	0	0	0	0	0	0	0	0	0	0	0	0	0	0	0	0	0	0	0	0	0	0	0	0	0	0	0	0	0	0	0	0	k__Fungi	p__Ascomycota	c__Lecanoromycetes	o__Ostropales	f__Stictidaceae	g__unidentified_Stictidaceae	s__unidentified_Stictidaceae	SH012536.07FU_HQ212176_reps
OTU3080	0	0	0	0	0	0	0	0	0	0	0	0	0	4	0	0	0	0	0	0	0	0	0	0	0	0	0	0	0	0	0	0	0	0	0	0	k__Fungi	p__Ascomycota	c__Lecanoromycetes	o__Ostropales	f__Stictidaceae	g__Cryptodiscus	s__unidentified_Cryptodiscus	New.CleanUp.ReferenceOTU68640
OTU3404	0	0	0	0	0	0	0	0	0	0	0	0	0	0	0	0	0	0	0	0	2	0	3	0	0	0	0	0	0	0	0	0	0	0	0	0	k__Fungi	p__Ascomycota	c__Lecanoromycetes	o__Peltigerales	f__Pannariaceae	g__unidentified_Pannariaceae	s__unidentified_Pannariaceae	New.CleanUp.ReferenceOTU66752
OTU3020	0	0	0	0	0	0	0	1	0	0	0	0	0	0	0	0	0	0	0	0	0	0	0	0	0	0	0	0	0	0	0	0	2	0	0	1	k__Fungi	p__Ascomycota	c__Lecanoromycetes	o__Pertusariales	f__Megasporaceae	g__Aspicilia	s__unidentified_Aspicilia	New.CleanUp.ReferenceOTU9674
OTU4444	7	0	0	0	0	0	0	0	0	0	0	0	0	0	3	1	0	2	0	0	0	0	0	0	0	0	0	0	0	0	0	0	0	0	0	0	k__Fungi	p__Ascomycota	c__Lecanoromycetes	o__Teloschistales	f__Physciaceae	g__Physcia	s__unidentified_Physcia	SH004991.07FU_DQ534477_reps
OTU549	1	0	0	0	0	0	0	0	0	0	0	0	0	0	0	0	0	0	0	0	0	0	0	0	0	0	0	0	0	0	0	0	0	0	0	0	k__Fungi	p__Ascomycota	c__Lecanoromycetes	o__Teloschistales	f__Physciaceae	g__Physcia	s__unidentified_Physcia	New.CleanUp.ReferenceOTU122770
OTU6914	0	0	0	3	0	0	27	2	0	43	2989	698	0	0	0	0	0	0	0	0	0	0	117	0	0	0	0	0	0	0	0	0	0	0	0	0	k__Fungi	p__Ascomycota	c__Leotiomycetes	o__unidentified_Leotiomycetes	f__unidentified_Leotiomycetes	g__unidentified_Leotiomycetes	s__unidentified_Leotiomycetes	New.ReferenceOTU54
OTU6894	0	23	2	46	31	25	519	265	72	225	163	87	42	0	0	0	4	0	6	1	155	259	407	29	0	0	0	0	0	0	0	0	26	22	137	107	k__Fungi	p__Ascomycota	c__Leotiomycetes	o__unidentified_Leotiomycetes	f__unidentified_Leotiomycetes	g__unidentified_Leotiomycetes	s__unidentified_Leotiomycetes	SH497060.07FU_KM246506_reps_singleton
OTU6831	0	6	0	4	2	0	153	68	0	17	705	213	0	9	0	0	0	0	0	0	312	211	182	0	0	0	0	0	0	0	0	0	1	0	15	4	k__Fungi	p__Ascomycota	c__Leotiomycetes	o__unidentified_Leotiomycetes	f__unidentified_Leotiomycetes	g__unidentified_Leotiomycetes	s__unidentified_Leotiomycetes	SH018364.07FU_AY706320_refs
OTU6763	0	0	0	0	0	0	0	0	0	0	1042	226	0	0	0	0	0	0	0	0	0	0	0	0	0	0	0	0	0	0	0	0	0	0	0	0	k__Fungi	p__Ascomycota	c__Leotiomycetes	o__unidentified_Leotiomycetes	f__unidentified_Leotiomycetes	g__unidentified_Leotiomycetes	s__unidentified_Leotiomycetes	New.ReferenceOTU905
OTU6749	0	0	0	0	0	0	14	0	1	0	0	0	0	0	0	0	0	0	0	0	0	0	0	0	0	0	0	0	0	0	0	0	214	614	95	182	k__Fungi	p__Ascomycota	c__Leotiomycetes	o__unidentified_Leotiomycetes	f__unidentified_Leotiomycetes	g__unidentified_Leotiomycetes	s__unidentified_Leotiomycetes	New.ReferenceOTU535
OTU6280	0	3	0	0	0	0	19	7	0	2	14	14	0	0	0	0	0	0	0	0	27	62	93	0	0	0	0	0	0	0	0	0	0	0	1	0	k__Fungi	p__Ascomycota	c__Leotiomycetes	o__unidentified_Leotiomycetes	f__unidentified_Leotiomycetes	g__unidentified_Leotiomycetes	s__unidentified_Leotiomycetes	New.CleanUp.ReferenceOTU57031
OTU6093	0	0	12	1	0	1	3	0	0	0	0	0	26	10	4	0	0	2	2	8	0	0	0	0	2	5	3	0	25	7	0	12	1	0	11	9	k__Fungi	p__Ascomycota	c__Leotiomycetes	o__unidentified_Leotiomycetes	f__unidentified_Leotiomycetes	g__unidentified_Leotiomycetes	s__unidentified_Leotiomycetes	SH028054.07FU_EU726288_reps
OTU5893	10	0	60	0	0	0	2	0	0	0	0	19	0	0	1	1	0	0	0	4	0	0	0	0	0	0	0	0	0	0	0	0	0	0	0	0	k__Fungi	p__Ascomycota	c__Leotiomycetes	o__unidentified_Leotiomycetes	f__unidentified_Leotiomycetes	g__unidentified_Leotiomycetes	s__unidentified_Leotiomycetes	SH487515.07FU_HG936890_reps
OTU5851	0	0	5	0	0	11	2	0	0	0	0	0	3	0	0	0	1	5	5	0	0	0	0	0	3	17	0	0	21	1	0	1	2	0	0	0	k__Fungi	p__Ascomycota	c__Leotiomycetes	o__unidentified_Leotiomycetes	f__unidentified_Leotiomycetes	g__unidentified_Leotiomycetes	s__unidentified_Leotiomycetes	SH004584.07FU_GQ996148_reps
OTU5287	0	0	0	0	0	0	6	0	0	0	20	9	0	0	0	0	0	0	0	0	0	0	0	0	0	0	0	0	0	0	0	0	0	0	0	0	k__Fungi	p__Ascomycota	c__Leotiomycetes	o__unidentified_Leotiomycetes	f__unidentified_Leotiomycetes	g__unidentified_Leotiomycetes	s__unidentified_Leotiomycetes	New.CleanUp.ReferenceOTU46385
OTU5771	0	0	0	0	0	0	0	0	0	0	0	0	7	0	0	19	0	0	0	1	0	0	0	7	0	0	0	0	0	0	0	0	0	0	0	0	k__Fungi	p__Ascomycota	c__Leotiomycetes	o__unidentified_Leotiomycetes	f__unidentified_Leotiomycetes	g__unidentified_Leotiomycetes	s__unidentified_Leotiomycetes	SH491957.07FU_HG937113_reps_singleton
OTU5149	0	0	30	0	0	0	0	0	0	0	0	0	0	0	0	0	0	0	0	0	0	0	0	0	0	0	0	0	0	0	0	0	0	0	0	0	k__Fungi	p__Ascomycota	c__Leotiomycetes	o__unidentified_Leotiomycetes	f__unidentified_Leotiomycetes	g__unidentified_Leotiomycetes	s__unidentified_Leotiomycetes	New.CleanUp.ReferenceOTU55579
OTU5034	0	0	3	0	0	1	2	4	0	0	0	0	0	0	0	0	9	0	0	0	0	0	0	0	1	0	2	0	3	1	0	0	0	0	0	0	k__Fungi	p__Ascomycota	c__Leotiomycetes	o__unidentified_Leotiomycetes	f__unidentified_Leotiomycetes	g__unidentified_Leotiomycetes	s__unidentified_Leotiomycetes	SH025598.07FU_GQ892249_reps_singleton
OTU4979	0	0	0	0	0	0	0	0	0	0	0	0	0	0	0	0	0	0	0	0	4	14	6	0	0	0	0	0	0	0	0	0	0	0	0	0	k__Fungi	p__Ascomycota	c__Leotiomycetes	o__unidentified_Leotiomycetes	f__unidentified_Leotiomycetes	g__unidentified_Leotiomycetes	s__unidentified_Leotiomycetes	New.CleanUp.ReferenceOTU106763
OTU4974	0	2	6	0	0	0	0	0	0	0	0	0	0	0	0	0	0	3	12	0	0	0	0	0	0	0	0	0	0	0	0	0	0	0	0	0	k__Fungi	p__Ascomycota	c__Leotiomycetes	o__unidentified_Leotiomycetes	f__unidentified_Leotiomycetes	g__unidentified_Leotiomycetes	s__unidentified_Leotiomycetes	New.CleanUp.ReferenceOTU2314
OTU4976	0	0	0	0	0	0	0	0	0	0	0	0	0	0	0	0	0	0	0	0	0	0	0	0	3	1	2	12	0	0	0	3	0	0	0	0	k__Fungi	p__Ascomycota	c__Leotiomycetes	o__unidentified_Leotiomycetes	f__unidentified_Leotiomycetes	g__unidentified_Leotiomycetes	s__unidentified_Leotiomycetes	New.CleanUp.ReferenceOTU81603
OTU4799	0	0	0	0	0	0	0	0	0	0	0	0	0	0	0	19	0	0	0	0	0	0	0	0	0	0	0	0	0	0	0	0	0	0	0	0	k__Fungi	p__Ascomycota	c__Leotiomycetes	o__unidentified_Leotiomycetes	f__unidentified_Leotiomycetes	g__unidentified_Leotiomycetes	s__unidentified_Leotiomycetes	SH025281.07FU_JF432966_reps
OTU4701	0	0	0	0	0	0	0	0	0	0	1	16	0	0	0	0	0	0	0	0	0	0	0	0	0	0	0	0	0	0	0	0	0	0	0	0	k__Fungi	p__Ascomycota	c__Leotiomycetes	o__unidentified_Leotiomycetes	f__unidentified_Leotiomycetes	g__unidentified_Leotiomycetes	s__unidentified_Leotiomycetes	New.CleanUp.ReferenceOTU25181
OTU4533	0	0	0	0	0	0	0	0	0	0	0	14	0	0	0	0	0	0	0	0	0	0	0	0	0	0	0	0	0	0	0	0	0	0	0	0	k__Fungi	p__Ascomycota	c__Leotiomycetes	o__unidentified_Leotiomycetes	f__unidentified_Leotiomycetes	g__unidentified_Leotiomycetes	s__unidentified_Leotiomycetes	New.CleanUp.ReferenceOTU14238
OTU5096	0	0	0	0	0	1	0	0	0	0	0	0	0	10	0	1	2	0	0	0	0	0	0	0	0	0	0	0	0	0	0	0	0	0	0	0	k__Fungi	p__Ascomycota	c__Leotiomycetes	o__unidentified_Leotiomycetes	f__unidentified_Leotiomycetes	g__unidentified_Leotiomycetes	s__unidentified_Leotiomycetes	New.CleanUp.ReferenceOTU32315
OTU4800	0	0	0	0	0	0	0	0	0	0	0	0	0	0	0	0	0	0	0	1	0	0	0	0	9	0	0	0	1	0	0	1	0	0	0	0	k__Fungi	p__Ascomycota	c__Leotiomycetes	o__unidentified_Leotiomycetes	f__unidentified_Leotiomycetes	g__unidentified_Leotiomycetes	s__unidentified_Leotiomycetes	New.ReferenceOTU340
OTU4313	0	0	0	0	0	0	0	0	0	0	0	0	0	0	0	0	0	0	0	0	4	6	1	0	0	0	0	0	0	0	0	0	0	0	0	0	k__Fungi	p__Ascomycota	c__Leotiomycetes	o__unidentified_Leotiomycetes	f__unidentified_Leotiomycetes	g__unidentified_Leotiomycetes	s__unidentified_Leotiomycetes	New.CleanUp.ReferenceOTU98771
OTU4539	0	0	0	0	0	0	0	0	0	0	0	0	0	0	0	0	0	0	0	0	0	0	0	0	6	0	4	0	0	0	0	0	0	0	0	0	k__Fungi	p__Ascomycota	c__Leotiomycetes	o__unidentified_Leotiomycetes	f__unidentified_Leotiomycetes	g__unidentified_Leotiomycetes	s__unidentified_Leotiomycetes	New.CleanUp.ReferenceOTU103564
OTU3781	0	0	0	0	0	0	0	0	0	0	0	0	0	0	0	0	0	0	0	0	0	0	0	7	0	0	0	0	0	0	0	0	0	0	0	0	k__Fungi	p__Ascomycota	c__Leotiomycetes	o__unidentified_Leotiomycetes	f__unidentified_Leotiomycetes	g__unidentified_Leotiomycetes	s__unidentified_Leotiomycetes	New.CleanUp.ReferenceOTU10481
OTU3805	0	0	0	0	0	0	0	0	0	0	0	0	0	0	0	0	0	0	0	0	0	0	0	0	2	0	0	0	4	1	0	0	0	0	0	0	k__Fungi	p__Ascomycota	c__Leotiomycetes	o__unidentified_Leotiomycetes	f__unidentified_Leotiomycetes	g__unidentified_Leotiomycetes	s__unidentified_Leotiomycetes	New.CleanUp.ReferenceOTU80299
OTU3333	0	0	0	0	0	0	1	0	0	0	0	0	0	0	0	0	1	1	0	0	0	0	0	0	0	0	0	0	1	1	0	0	0	0	0	0	k__Fungi	p__Ascomycota	c__Leotiomycetes	o__unidentified_Leotiomycetes	f__unidentified_Leotiomycetes	g__unidentified_Leotiomycetes	s__unidentified_Leotiomycetes	SH018406.07FU_UDB020633_reps
OTU3384	0	0	0	0	0	0	0	0	0	0	0	0	0	0	0	0	0	0	0	0	0	0	0	0	5	0	0	0	0	0	0	0	0	0	0	0	k__Fungi	p__Ascomycota	c__Leotiomycetes	o__unidentified_Leotiomycetes	f__unidentified_Leotiomycetes	g__unidentified_Leotiomycetes	s__unidentified_Leotiomycetes	New.CleanUp.ReferenceOTU32024
OTU4101	5	0	0	0	0	0	0	0	0	0	0	0	0	0	0	0	0	0	0	0	0	0	0	0	0	0	0	0	0	0	0	0	0	0	0	0	k__Fungi	p__Ascomycota	c__Leotiomycetes	o__unidentified_Leotiomycetes	f__unidentified_Leotiomycetes	g__unidentified_Leotiomycetes	s__unidentified_Leotiomycetes	New.CleanUp.ReferenceOTU66166
OTU3081	0	0	0	0	0	0	0	0	0	0	0	4	0	0	0	0	0	0	0	0	0	0	0	0	0	0	0	0	0	0	0	0	0	0	0	0	k__Fungi	p__Ascomycota	c__Leotiomycetes	o__unidentified_Leotiomycetes	f__unidentified_Leotiomycetes	g__unidentified_Leotiomycetes	s__unidentified_Leotiomycetes	New.CleanUp.ReferenceOTU68930
OTU3085	4	0	0	0	0	0	0	0	0	0	0	0	0	0	0	0	0	0	0	0	0	0	0	0	0	0	0	0	0	0	0	0	0	0	0	0	k__Fungi	p__Ascomycota	c__Leotiomycetes	o__unidentified_Leotiomycetes	f__unidentified_Leotiomycetes	g__unidentified_Leotiomycetes	s__unidentified_Leotiomycetes	New.CleanUp.ReferenceOTU74827
OTU3090	0	0	0	0	0	0	3	0	0	0	1	0	0	0	0	0	0	0	0	0	0	0	0	0	0	0	0	0	0	0	0	0	0	0	0	0	k__Fungi	p__Ascomycota	c__Leotiomycetes	o__unidentified_Leotiomycetes	f__unidentified_Leotiomycetes	g__unidentified_Leotiomycetes	s__unidentified_Leotiomycetes	New.CleanUp.ReferenceOTU78144
OTU3124	0	0	0	0	0	0	1	0	0	0	0	0	0	0	0	0	0	0	0	0	0	1	2	0	0	0	0	0	0	0	0	0	0	0	0	0	k__Fungi	p__Ascomycota	c__Leotiomycetes	o__unidentified_Leotiomycetes	f__unidentified_Leotiomycetes	g__unidentified_Leotiomycetes	s__unidentified_Leotiomycetes	New.CleanUp.ReferenceOTU121518
OTU1270	0	0	0	0	0	0	0	0	0	0	0	0	0	0	0	0	0	0	0	0	2	0	0	0	0	0	0	0	0	0	0	0	0	0	0	0	k__Fungi	p__Ascomycota	c__Leotiomycetes	o__unidentified_Leotiomycetes	f__unidentified_Leotiomycetes	g__unidentified_Leotiomycetes	s__unidentified_Leotiomycetes	New.CleanUp.ReferenceOTU2414
OTU1281	0	0	0	1	0	0	0	1	0	0	0	0	0	0	0	0	0	0	0	0	0	0	0	0	0	0	0	0	0	0	0	0	0	0	0	0	k__Fungi	p__Ascomycota	c__Leotiomycetes	o__unidentified_Leotiomycetes	f__unidentified_Leotiomycetes	g__unidentified_Leotiomycetes	s__unidentified_Leotiomycetes	New.CleanUp.ReferenceOTU4908
OTU1301	0	0	0	0	0	0	0	2	0	0	0	0	0	0	0	0	0	0	0	0	0	0	0	0	0	0	0	0	0	0	0	0	0	0	0	0	k__Fungi	p__Ascomycota	c__Leotiomycetes	o__unidentified_Leotiomycetes	f__unidentified_Leotiomycetes	g__unidentified_Leotiomycetes	s__unidentified_Leotiomycetes	New.CleanUp.ReferenceOTU11575
OTU1304	0	0	0	0	0	0	0	1	0	0	0	1	0	0	0	0	0	0	0	0	0	0	0	0	0	0	0	0	0	0	0	0	0	0	0	0	k__Fungi	p__Ascomycota	c__Leotiomycetes	o__unidentified_Leotiomycetes	f__unidentified_Leotiomycetes	g__unidentified_Leotiomycetes	s__unidentified_Leotiomycetes	New.CleanUp.ReferenceOTU12781
OTU1372	0	0	0	0	0	0	0	0	0	0	2	0	0	0	0	0	0	0	0	0	0	0	0	0	0	0	0	0	0	0	0	0	0	0	0	0	k__Fungi	p__Ascomycota	c__Leotiomycetes	o__unidentified_Leotiomycetes	f__unidentified_Leotiomycetes	g__unidentified_Leotiomycetes	s__unidentified_Leotiomycetes	New.CleanUp.ReferenceOTU36982
OTU1430	0	0	0	0	0	0	0	0	0	0	2	0	0	0	0	0	0	0	0	0	0	0	0	0	0	0	0	0	0	0	0	0	0	0	0	0	k__Fungi	p__Ascomycota	c__Leotiomycetes	o__unidentified_Leotiomycetes	f__unidentified_Leotiomycetes	g__unidentified_Leotiomycetes	s__unidentified_Leotiomycetes	New.CleanUp.ReferenceOTU58584
OTU1454	0	0	0	0	0	0	0	0	0	0	2	0	0	0	0	0	0	0	0	0	0	0	0	0	0	0	0	0	0	0	0	0	0	0	0	0	k__Fungi	p__Ascomycota	c__Leotiomycetes	o__unidentified_Leotiomycetes	f__unidentified_Leotiomycetes	g__unidentified_Leotiomycetes	s__unidentified_Leotiomycetes	New.CleanUp.ReferenceOTU65324
OTU1465	0	0	0	0	0	0	0	0	0	0	0	0	0	0	0	0	0	0	0	0	0	0	2	0	0	0	0	0	0	0	0	0	0	0	0	0	k__Fungi	p__Ascomycota	c__Leotiomycetes	o__unidentified_Leotiomycetes	f__unidentified_Leotiomycetes	g__unidentified_Leotiomycetes	s__unidentified_Leotiomycetes	New.CleanUp.ReferenceOTU69401
OTU57	0	0	1	0	0	0	0	0	0	0	0	0	0	0	0	0	0	0	0	0	0	0	0	0	0	0	0	0	0	0	0	0	0	0	0	0	k__Fungi	p__Ascomycota	c__Leotiomycetes	o__unidentified_Leotiomycetes	f__unidentified_Leotiomycetes	g__unidentified_Leotiomycetes	s__unidentified_Leotiomycetes	SH013008.07FU_KF296819_reps_singleton
OTU62	0	1	0	0	0	0	0	0	0	0	0	0	0	0	0	0	0	0	0	0	0	0	0	0	0	0	0	0	0	0	0	0	0	0	0	0	k__Fungi	p__Ascomycota	c__Leotiomycetes	o__unidentified_Leotiomycetes	f__unidentified_Leotiomycetes	g__unidentified_Leotiomycetes	s__unidentified_Leotiomycetes	SH025599.07FU_KF617520_reps
OTU1282	0	0	0	0	0	0	0	0	0	1	0	0	0	0	0	0	0	0	0	0	0	0	0	0	0	0	0	0	0	0	0	0	0	0	0	0	k__Fungi	p__Ascomycota	c__Leotiomycetes	o__unidentified_Leotiomycetes	f__unidentified_Leotiomycetes	g__unidentified_Leotiomycetes	s__unidentified_Leotiomycetes	New.CleanUp.ReferenceOTU4987
OTU1534	0	0	0	0	0	0	0	0	0	0	0	0	0	0	0	0	0	0	0	0	0	0	0	0	0	0	0	0	0	0	0	0	0	0	1	0	k__Fungi	p__Ascomycota	c__Leotiomycetes	o__unidentified_Leotiomycetes	f__unidentified_Leotiomycetes	g__unidentified_Leotiomycetes	s__unidentified_Leotiomycetes	New.CleanUp.ReferenceOTU86347
OTU6515	0	2	0	0	0	1	8	0	0	33	49	19	8	0	0	0	10	8	8	0	11	52	54	0	1	4	1	4	7	1	0	0	42	43	20	12	k__Fungi	p__Ascomycota	c__Leotiomycetes	o__Helotiales	f__unidentified_Helotiales	g__unidentified_Helotiales	s__unidentified_Helotiales	New.ReferenceOTU719
OTU6496	0	2	8	1	2	13	13	6	0	0	0	0	155	5	4	1	0	1	8	4	3	0	0	0	1	35	1	13	7	8	28	9	0	0	2	0	k__Fungi	p__Ascomycota	c__Leotiomycetes	o__Helotiales	f__unidentified_Helotiales	g__unidentified_Helotiales	s__unidentified_Helotiales	SH018376.07FU_EU715657_reps
OTU6317	0	3	1	0	73	1	0	0	0	0	2	0	21	0	0	0	0	32	0	81	0	0	0	0	14	12	1	0	0	1	0	0	0	0	0	0	k__Fungi	p__Ascomycota	c__Leotiomycetes	o__Helotiales	f__unidentified_Helotiales	g__unidentified_Helotiales	s__unidentified_Helotiales	New.ReferenceOTU184
OTU6319	0	0	1	0	2	9	7	3	0	2	1	0	2	0	0	0	0	7	0	0	0	9	15	0	1	5	3	14	1	12	5	8	19	12	47	42	k__Fungi	p__Ascomycota	c__Leotiomycetes	o__Helotiales	f__unidentified_Helotiales	g__unidentified_Helotiales	s__unidentified_Helotiales	SH030223.07FU_GU581233_reps_singleton
OTU6218	0	0	0	1	0	0	0	0	0	3	0	0	0	0	0	0	2	7	0	0	0	1	14	0	0	5	5	2	3	4	2	17	23	7	38	24	k__Fungi	p__Ascomycota	c__Leotiomycetes	o__Helotiales	f__unidentified_Helotiales	g__unidentified_Helotiales	s__unidentified_Helotiales	New.CleanUp.ReferenceOTU8936
OTU5977	0	26	0	58	0	0	0	0	0	0	0	0	12	0	0	2	0	0	3	1	0	0	0	0	0	0	0	0	0	0	0	0	0	0	0	0	k__Fungi	p__Ascomycota	c__Leotiomycetes	o__Helotiales	f__unidentified_Helotiales	g__unidentified_Helotiales	s__unidentified_Helotiales	SH014501.07FU_FJ475732_refs
OTU5923	9	0	8	0	2	0	0	3	0	0	0	0	64	0	0	1	1	3	0	3	5	0	0	0	0	0	0	0	0	0	0	0	0	0	0	0	k__Fungi	p__Ascomycota	c__Leotiomycetes	o__Helotiales	f__unidentified_Helotiales	g__unidentified_Helotiales	s__unidentified_Helotiales	New.ReferenceOTU800
OTU5845	6	0	0	0	3	22	10	0	0	0	1	10	9	0	0	0	17	0	0	0	0	0	0	0	0	0	0	0	0	0	0	0	0	0	0	0	k__Fungi	p__Ascomycota	c__Leotiomycetes	o__Helotiales	f__unidentified_Helotiales	g__unidentified_Helotiales	s__unidentified_Helotiales	SH020813.07FU_AY033087_refs
OTU5757	0	0	0	2	0	0	0	0	0	0	0	0	71	0	0	0	0	0	0	0	0	0	0	0	0	0	0	0	0	0	0	0	0	0	0	0	k__Fungi	p__Ascomycota	c__Leotiomycetes	o__Helotiales	f__unidentified_Helotiales	g__unidentified_Helotiales	s__unidentified_Helotiales	SH016021.07FU_KJ528993_reps
OTU5918	0	0	21	0	0	2	0	1	0	0	2	0	0	12	18	0	14	0	0	0	0	0	0	0	0	0	0	0	0	0	0	0	0	0	0	0	k__Fungi	p__Ascomycota	c__Leotiomycetes	o__Helotiales	f__unidentified_Helotiales	g__unidentified_Helotiales	s__unidentified_Helotiales	New.CleanUp.ReferenceOTU87032
OTU5584	13	0	2	9	0	0	0	0	0	0	0	0	0	4	12	0	0	0	1	6	0	0	0	0	0	0	0	0	0	0	0	0	0	0	0	0	k__Fungi	p__Ascomycota	c__Leotiomycetes	o__Helotiales	f__unidentified_Helotiales	g__unidentified_Helotiales	s__unidentified_Helotiales	SH028233.07FU_HQ212214_reps_singleton
OTU5545	0	0	0	0	0	0	1	0	0	0	0	0	7	10	0	0	0	0	1	0	0	0	0	0	0	0	0	0	0	0	0	0	10	0	13	0	k__Fungi	p__Ascomycota	c__Leotiomycetes	o__Helotiales	f__unidentified_Helotiales	g__unidentified_Helotiales	s__unidentified_Helotiales	SH493491.07FU_HG937021_reps
OTU5035	0	4	0	0	5	0	13	4	0	0	0	0	0	0	0	0	0	0	0	0	0	0	0	0	0	0	0	0	0	0	0	0	0	0	0	0	k__Fungi	p__Ascomycota	c__Leotiomycetes	o__Helotiales	f__unidentified_Helotiales	g__unidentified_Helotiales	s__unidentified_Helotiales	SH018392.07FU_AF252848_refs
OTU5097	0	0	0	0	0	0	0	0	0	0	0	0	10	0	10	0	0	0	0	0	0	0	0	0	0	0	0	0	0	0	0	0	2	0	3	0	k__Fungi	p__Ascomycota	c__Leotiomycetes	o__Helotiales	f__unidentified_Helotiales	g__unidentified_Helotiales	s__unidentified_Helotiales	New.CleanUp.ReferenceOTU75527
OTU4863	0	6	0	0	14	0	0	0	0	0	0	0	0	0	0	0	0	0	0	0	0	0	0	0	0	0	0	0	0	0	0	0	0	0	0	0	k__Fungi	p__Ascomycota	c__Leotiomycetes	o__Helotiales	f__unidentified_Helotiales	g__unidentified_Helotiales	s__unidentified_Helotiales	New.CleanUp.ReferenceOTU9959
OTU4456	0	0	0	1	0	2	0	0	0	0	0	0	0	0	0	0	2	5	0	0	0	0	0	0	0	0	0	0	0	0	0	3	0	0	0	0	k__Fungi	p__Ascomycota	c__Leotiomycetes	o__Helotiales	f__unidentified_Helotiales	g__unidentified_Helotiales	s__unidentified_Helotiales	SH027368.07FU_FM999517_reps
OTU4201	0	0	0	0	0	1	5	1	0	0	0	3	0	0	0	0	0	0	0	0	0	0	0	0	0	0	0	0	0	0	0	0	0	0	0	0	k__Fungi	p__Ascomycota	c__Leotiomycetes	o__Helotiales	f__unidentified_Helotiales	g__unidentified_Helotiales	s__unidentified_Helotiales	New.CleanUp.ReferenceOTU59718
OTU4063	0	0	0	0	0	0	0	0	0	0	0	0	0	0	0	0	0	9	0	0	0	0	0	0	0	0	0	0	0	0	0	0	0	0	0	0	k__Fungi	p__Ascomycota	c__Leotiomycetes	o__Helotiales	f__unidentified_Helotiales	g__unidentified_Helotiales	s__unidentified_Helotiales	SH015824.07FU_FJ911894_reps_singleton
OTU4081	0	0	0	0	0	0	0	0	0	0	0	0	0	0	0	0	0	0	9	0	0	0	0	0	0	0	0	0	0	0	0	0	0	0	0	0	k__Fungi	p__Ascomycota	c__Leotiomycetes	o__Helotiales	f__unidentified_Helotiales	g__unidentified_Helotiales	s__unidentified_Helotiales	New.CleanUp.ReferenceOTU16446
OTU4083	0	0	0	0	0	0	0	2	0	0	0	0	0	0	0	0	3	0	4	0	0	0	0	0	0	0	0	0	0	0	0	0	0	0	0	0	k__Fungi	p__Ascomycota	c__Leotiomycetes	o__Helotiales	f__unidentified_Helotiales	g__unidentified_Helotiales	s__unidentified_Helotiales	New.CleanUp.ReferenceOTU18639
OTU3934	0	0	0	0	0	0	0	0	0	0	0	0	0	0	0	0	0	8	0	0	0	0	0	0	0	0	0	0	0	0	0	0	0	0	0	0	k__Fungi	p__Ascomycota	c__Leotiomycetes	o__Helotiales	f__unidentified_Helotiales	g__unidentified_Helotiales	s__unidentified_Helotiales	SH489682.07FU_KU559682_reps_singleton
OTU3940	0	0	0	0	2	1	5	0	0	0	0	0	0	0	0	0	0	0	0	0	0	0	0	0	0	0	0	0	0	0	0	0	0	0	0	0	k__Fungi	p__Ascomycota	c__Leotiomycetes	o__Helotiales	f__unidentified_Helotiales	g__unidentified_Helotiales	s__unidentified_Helotiales	SH013478.07FU_KC514873_reps
OTU3974	0	0	0	0	0	0	0	0	0	0	0	0	0	0	0	0	0	0	0	0	5	0	3	0	0	0	0	0	0	0	0	0	0	0	0	0	k__Fungi	p__Ascomycota	c__Leotiomycetes	o__Helotiales	f__unidentified_Helotiales	g__unidentified_Helotiales	s__unidentified_Helotiales	New.CleanUp.ReferenceOTU84726
OTU3013	0	0	0	0	0	0	0	0	0	0	0	0	0	0	0	0	0	0	0	0	0	0	4	0	0	0	0	0	0	0	0	0	0	0	0	0	k__Fungi	p__Ascomycota	c__Leotiomycetes	o__Helotiales	f__unidentified_Helotiales	g__unidentified_Helotiales	s__unidentified_Helotiales	New.CleanUp.ReferenceOTU2293
OTU3066	0	0	0	0	4	0	0	0	0	0	0	0	0	0	0	0	0	0	0	0	0	0	0	0	0	0	0	0	0	0	0	0	0	0	0	0	k__Fungi	p__Ascomycota	c__Leotiomycetes	o__Helotiales	f__unidentified_Helotiales	g__unidentified_Helotiales	s__unidentified_Helotiales	New.CleanUp.ReferenceOTU55666
OTU3095	4	0	0	0	0	0	0	0	0	0	0	0	0	0	0	0	0	0	0	0	0	0	0	0	0	0	0	0	0	0	0	0	0	0	0	0	k__Fungi	p__Ascomycota	c__Leotiomycetes	o__Helotiales	f__unidentified_Helotiales	g__unidentified_Helotiales	s__unidentified_Helotiales	New.CleanUp.ReferenceOTU81327
OTU3106	4	0	0	0	0	0	0	0	0	0	0	0	0	0	0	0	0	0	0	0	0	0	0	0	0	0	0	0	0	0	0	0	0	0	0	0	k__Fungi	p__Ascomycota	c__Leotiomycetes	o__Helotiales	f__unidentified_Helotiales	g__unidentified_Helotiales	s__unidentified_Helotiales	New.CleanUp.ReferenceOTU93441
OTU3108	0	1	0	0	1	0	0	2	0	0	0	0	0	0	0	0	0	0	0	0	0	0	0	0	0	0	0	0	0	0	0	0	0	0	0	0	k__Fungi	p__Ascomycota	c__Leotiomycetes	o__Helotiales	f__unidentified_Helotiales	g__unidentified_Helotiales	s__unidentified_Helotiales	New.CleanUp.ReferenceOTU96083
OTU2414	0	0	1	0	0	0	0	2	0	0	0	0	0	0	0	0	0	0	0	0	0	0	0	0	0	0	0	0	0	0	0	0	0	0	0	0	k__Fungi	p__Ascomycota	c__Leotiomycetes	o__Helotiales	f__unidentified_Helotiales	g__unidentified_Helotiales	s__unidentified_Helotiales	SH014935.07FU_AY249072_refs
OTU2539	0	0	0	0	0	0	0	0	0	0	0	0	0	0	0	0	0	0	0	0	0	2	0	0	0	0	0	0	0	0	0	0	0	0	0	1	k__Fungi	p__Ascomycota	c__Leotiomycetes	o__Helotiales	f__unidentified_Helotiales	g__unidentified_Helotiales	s__unidentified_Helotiales	New.CleanUp.ReferenceOTU42296
OTU1206	0	0	0	0	0	0	0	0	0	0	0	0	0	0	0	0	0	0	2	0	0	0	0	0	0	0	0	0	0	0	0	0	0	0	0	0	k__Fungi	p__Ascomycota	c__Leotiomycetes	o__Helotiales	f__unidentified_Helotiales	g__unidentified_Helotiales	s__unidentified_Helotiales	SH013309.07FU_UDB020581_reps_singleton
OTU1511	0	0	0	0	0	0	0	0	0	0	0	0	0	0	0	0	0	0	0	0	0	0	0	0	0	0	0	0	0	0	2	0	0	0	0	0	k__Fungi	p__Ascomycota	c__Leotiomycetes	o__Helotiales	f__unidentified_Helotiales	g__unidentified_Helotiales	s__unidentified_Helotiales	New.CleanUp.ReferenceOTU79950
OTU3006	0	0	0	0	0	0	0	0	0	0	0	0	0	0	0	0	2	0	0	0	0	0	0	0	0	0	0	0	0	0	0	0	0	0	0	0	k__Fungi	p__Ascomycota	c__Leotiomycetes	o__Helotiales	f__unidentified_Helotiales	g__unidentified_Helotiales	s__unidentified_Helotiales	SH027372.07FU_HF947877_reps
OTU3957	0	0	0	0	0	0	0	0	0	0	0	0	0	0	0	0	1	0	0	0	0	0	0	0	0	0	0	0	0	0	1	0	0	0	0	0	k__Fungi	p__Ascomycota	c__Leotiomycetes	o__Helotiales	f__unidentified_Helotiales	g__unidentified_Helotiales	s__unidentified_Helotiales	New.CleanUp.ReferenceOTU36058
OTU85	0	0	0	0	0	0	0	0	0	0	0	0	0	0	0	0	0	1	0	0	0	0	0	0	0	0	0	0	0	0	0	0	0	0	0	0	k__Fungi	p__Ascomycota	c__Leotiomycetes	o__Helotiales	f__unidentified_Helotiales	g__unidentified_Helotiales	s__unidentified_Helotiales	SH018488.07FU_GU174311_reps_singleton
OTU162	0	0	1	0	0	0	0	0	0	0	0	0	0	0	0	0	0	0	0	0	0	0	0	0	0	0	0	0	0	0	0	0	0	0	0	0	k__Fungi	p__Ascomycota	c__Leotiomycetes	o__Helotiales	f__unidentified_Helotiales	g__unidentified_Helotiales	s__unidentified_Helotiales	New.CleanUp.ReferenceOTU6364
OTU211	0	0	0	0	0	0	0	0	0	0	0	0	0	0	0	0	1	0	0	0	0	0	0	0	0	0	0	0	0	0	0	0	0	0	0	0	k__Fungi	p__Ascomycota	c__Leotiomycetes	o__Helotiales	f__unidentified_Helotiales	g__unidentified_Helotiales	s__unidentified_Helotiales	New.CleanUp.ReferenceOTU21214
OTU480	0	0	0	0	0	1	0	0	0	0	0	0	0	0	0	0	0	0	0	0	0	0	0	0	0	0	0	0	0	0	0	0	0	0	0	0	k__Fungi	p__Ascomycota	c__Leotiomycetes	o__Helotiales	f__unidentified_Helotiales	g__unidentified_Helotiales	s__unidentified_Helotiales	New.CleanUp.ReferenceOTU103405
OTU6875	0	1	9	21	10	5	776	72	31	89	2	13	143	0	1	11	3	8	2	34	140	9	4	0	0	0	0	0	0	0	0	2	333	118	39	24	k__Fungi	p__Ascomycota	c__Leotiomycetes	o__Helotiales	f__unidentified_Helotiales	g__unidentified_Helotiales	s__unidentified_Helotiales	SH486407.07FU_UDB020434_reps_singleton
OTU6801	0	6	0	0	0	2	48	0	0	0	0	2	0	0	0	0	0	24	0	0	0	0	0	0	159	72	46	267	174	151	312	22	1	1	0	2	k__Fungi	p__Ascomycota	c__Leotiomycetes	o__Helotiales	f__unidentified_Helotiales	g__unidentified_Helotiales	s__unidentified_Helotiales	SH014678.07FU_AY699664_refs
OTU6740	6	16	0	0	0	13	14	0	0	1	0	0	0	0	0	0	0	9	0	2	0	0	0	0	108	39	15	249	145	30	151	56	0	0	0	2	k__Fungi	p__Ascomycota	c__Leotiomycetes	o__Helotiales	f__unidentified_Helotiales	g__unidentified_Helotiales	s__unidentified_Helotiales	SH013269.07FU_AY699656_refs
OTU6720	11	24	19	46	0	0	1	12	0	0	0	22	42	0	24	5	0	0	0	2	0	195	36	0	0	0	0	0	0	1	0	0	81	86	72	21	k__Fungi	p__Ascomycota	c__Leotiomycetes	o__Helotiales	f__unidentified_Helotiales	g__unidentified_Helotiales	s__unidentified_Helotiales	New.ReferenceOTU700
OTU6681	0	5	0	0	3	125	1	9	1	0	0	0	0	0	0	0	2	4	0	0	0	0	0	0	7	10	66	46	27	22	105	136	0	0	0	0	k__Fungi	p__Ascomycota	c__Leotiomycetes	o__Helotiales	f__unidentified_Helotiales	g__unidentified_Helotiales	s__unidentified_Helotiales	New.ReferenceOTU103
OTU6532	3	9	0	13	119	57	27	1	0	0	0	0	9	0	0	0	1	184	0	1	0	0	0	0	0	0	0	0	0	0	0	0	0	0	0	0	k__Fungi	p__Ascomycota	c__Leotiomycetes	o__Helotiales	f__unidentified_Helotiales	g__unidentified_Helotiales	s__unidentified_Helotiales	SH024928.07FU_HE814201_refs
OTU6512	3	0	2	1	0	0	0	4	0	0	63	33	0	0	0	0	0	1	0	0	7	33	266	0	0	0	0	0	0	0	0	0	4	1	0	0	k__Fungi	p__Ascomycota	c__Leotiomycetes	o__Helotiales	f__unidentified_Helotiales	g__unidentified_Helotiales	s__unidentified_Helotiales	SH000130.07FU_DQ914672_reps
OTU6478	0	0	0	0	0	0	0	0	0	0	0	2	0	0	0	0	0	0	0	0	0	0	409	0	0	0	0	0	0	0	0	0	0	0	0	0	k__Fungi	p__Ascomycota	c__Leotiomycetes	o__Helotiales	f__unidentified_Helotiales	g__unidentified_Helotiales	s__unidentified_Helotiales	New.CleanUp.ReferenceOTU65261
OTU6475	0	0	0	0	0	0	0	0	0	0	265	142	0	0	0	0	0	0	0	0	0	1	0	0	0	0	0	0	0	0	0	0	0	0	0	0	k__Fungi	p__Ascomycota	c__Leotiomycetes	o__Helotiales	f__unidentified_Helotiales	g__unidentified_Helotiales	s__unidentified_Helotiales	New.CleanUp.ReferenceOTU45964
OTU6473	0	9	0	0	0	0	4	0	0	4	162	83	0	0	0	0	0	0	0	0	0	29	109	0	0	0	0	0	0	0	0	0	0	0	0	0	k__Fungi	p__Ascomycota	c__Leotiomycetes	o__Helotiales	f__unidentified_Helotiales	g__unidentified_Helotiales	s__unidentified_Helotiales	New.ReferenceOTU739
OTU6533	11	22	6	12	6	0	2	16	0	0	0	0	106	55	41	3	20	16	38	28	0	0	0	0	0	0	0	0	0	0	0	0	0	0	0	0	k__Fungi	p__Ascomycota	c__Leotiomycetes	o__Helotiales	f__unidentified_Helotiales	g__unidentified_Helotiales	s__unidentified_Helotiales	SH021331.07FU_GQ221644_refs
OTU6401	0	127	0	0	0	0	139	1	0	0	27	9	0	0	0	0	0	0	0	0	0	0	8	0	0	0	0	0	0	0	0	0	0	0	0	0	k__Fungi	p__Ascomycota	c__Leotiomycetes	o__Helotiales	f__unidentified_Helotiales	g__unidentified_Helotiales	s__unidentified_Helotiales	New.CleanUp.ReferenceOTU630
OTU6369	0	0	18	33	1	0	27	0	0	0	4	0	5	0	0	0	4	5	0	6	23	37	78	0	3	0	0	0	0	0	0	0	0	0	0	0	k__Fungi	p__Ascomycota	c__Leotiomycetes	o__Helotiales	f__unidentified_Helotiales	g__unidentified_Helotiales	s__unidentified_Helotiales	SH486743.07FU_JQ346940_reps_singleton
OTU6109	0	0	0	0	0	1	1	2	0	0	0	0	8	0	0	0	5	0	0	0	0	0	5	0	0	0	0	0	0	0	0	0	8	7	10	105	k__Fungi	p__Ascomycota	c__Leotiomycetes	o__Helotiales	f__unidentified_Helotiales	g__unidentified_Helotiales	s__unidentified_Helotiales	New.CleanUp.ReferenceOTU10795
OTU6090	3	0	12	4	0	2	0	0	9	0	0	6	0	11	3	0	5	1	11	6	0	0	41	6	5	1	0	0	5	1	0	1	0	0	0	0	k__Fungi	p__Ascomycota	c__Leotiomycetes	o__Helotiales	f__unidentified_Helotiales	g__unidentified_Helotiales	s__unidentified_Helotiales	SH002161.07FU_Z80885_reps
OTU6159	3	0	18	15	5	19	5	9	0	0	0	0	2	3	9	0	2	0	18	11	0	0	0	0	0	1	0	0	0	0	0	0	0	0	0	0	k__Fungi	p__Ascomycota	c__Leotiomycetes	o__Helotiales	f__unidentified_Helotiales	g__unidentified_Helotiales	s__unidentified_Helotiales	New.CleanUp.ReferenceOTU3525
OTU6003	0	1	0	24	6	8	18	0	0	0	0	0	33	0	0	0	2	14	9	3	0	0	0	0	0	0	0	0	0	0	0	0	0	0	0	0	k__Fungi	p__Ascomycota	c__Leotiomycetes	o__Helotiales	f__unidentified_Helotiales	g__unidentified_Helotiales	s__unidentified_Helotiales	New.CleanUp.ReferenceOTU103597
OTU5941	0	0	0	0	0	0	0	0	0	0	0	94	0	0	0	0	0	0	0	0	0	18	0	0	0	0	0	0	0	0	0	0	0	0	0	0	k__Fungi	p__Ascomycota	c__Leotiomycetes	o__Helotiales	f__unidentified_Helotiales	g__unidentified_Helotiales	s__unidentified_Helotiales	SH469621.07FU_GU174427_reps_singleton
OTU5906	9	3	12	0	0	0	6	2	0	0	0	30	4	0	1	0	0	0	0	0	6	24	2	0	0	0	0	0	0	0	0	0	0	0	0	0	k__Fungi	p__Ascomycota	c__Leotiomycetes	o__Helotiales	f__unidentified_Helotiales	g__unidentified_Helotiales	s__unidentified_Helotiales	New.ReferenceOTU134
OTU6128	0	0	0	0	0	0	0	0	0	0	0	0	0	0	0	0	0	0	0	0	0	0	0	0	0	6	28	3	16	6	16	17	0	0	0	0	k__Fungi	p__Ascomycota	c__Leotiomycetes	o__Helotiales	f__unidentified_Helotiales	g__unidentified_Helotiales	s__unidentified_Helotiales	New.ReferenceOTU78
OTU5915	0	8	0	0	0	0	4	0	0	0	13	4	0	0	0	0	0	0	0	0	0	0	61	0	0	0	0	0	0	0	0	0	0	0	0	0	k__Fungi	p__Ascomycota	c__Leotiomycetes	o__Helotiales	f__unidentified_Helotiales	g__unidentified_Helotiales	s__unidentified_Helotiales	SH019734.07FU_HQ021885_reps
OTU5916	0	2	0	1	5	4	0	2	0	10	22	8	5	0	0	0	5	0	0	0	11	7	0	0	0	0	0	0	0	0	0	0	3	0	0	0	k__Fungi	p__Ascomycota	c__Leotiomycetes	o__Helotiales	f__unidentified_Helotiales	g__unidentified_Helotiales	s__unidentified_Helotiales	SH013874.07FU_FJ378725_reps
OTU5774	0	0	5	0	0	0	0	0	0	0	0	0	0	1	0	0	0	0	0	2	0	0	0	0	0	2	2	35	0	0	1	30	0	0	0	0	k__Fungi	p__Ascomycota	c__Leotiomycetes	o__Helotiales	f__unidentified_Helotiales	g__unidentified_Helotiales	s__unidentified_Helotiales	New.CleanUp.ReferenceOTU9977
OTU5711	0	0	0	0	0	0	0	0	0	0	0	0	0	0	0	0	0	0	0	0	0	0	0	0	4	2	4	17	16	7	21	0	0	0	0	0	k__Fungi	p__Ascomycota	c__Leotiomycetes	o__Helotiales	f__unidentified_Helotiales	g__unidentified_Helotiales	s__unidentified_Helotiales	SH025466.07FU_HQ211636_refs
OTU5686	0	0	0	0	0	0	0	0	0	0	39	28	0	0	0	0	0	0	0	0	0	0	0	0	0	0	0	0	0	0	0	0	0	0	0	0	k__Fungi	p__Ascomycota	c__Leotiomycetes	o__Helotiales	f__unidentified_Helotiales	g__unidentified_Helotiales	s__unidentified_Helotiales	SH006000.07FU_EF040842_reps_singleton
OTU5647	0	0	0	0	0	0	58	1	0	0	3	0	0	0	0	0	0	0	0	0	0	0	0	0	0	0	0	0	0	0	0	0	0	0	0	0	k__Fungi	p__Ascomycota	c__Leotiomycetes	o__Helotiales	f__unidentified_Helotiales	g__unidentified_Helotiales	s__unidentified_Helotiales	New.CleanUp.ReferenceOTU49526
OTU5671	0	1	0	0	15	11	2	1	0	0	0	0	1	0	0	0	0	26	0	1	0	0	0	0	0	1	0	0	3	0	0	0	0	0	0	0	k__Fungi	p__Ascomycota	c__Leotiomycetes	o__Helotiales	f__unidentified_Helotiales	g__unidentified_Helotiales	s__unidentified_Helotiales	New.CleanUp.ReferenceOTU122178
OTU5694	0	0	0	0	0	4	0	0	0	2	8	0	31	0	0	0	3	0	0	0	0	5	6	0	0	0	0	0	0	0	0	0	0	0	0	0	k__Fungi	p__Ascomycota	c__Leotiomycetes	o__Helotiales	f__unidentified_Helotiales	g__unidentified_Helotiales	s__unidentified_Helotiales	New.CleanUp.ReferenceOTU6992
OTU5608	0	2	0	0	0	0	0	0	0	0	11	4	0	0	0	0	0	0	0	0	1	0	40	0	0	0	0	0	0	0	0	0	0	0	0	0	k__Fungi	p__Ascomycota	c__Leotiomycetes	o__Helotiales	f__unidentified_Helotiales	g__unidentified_Helotiales	s__unidentified_Helotiales	New.CleanUp.ReferenceOTU49156
OTU5687	0	0	0	0	1	9	3	0	0	0	0	0	4	0	0	0	0	3	3	5	0	0	0	0	2	4	0	5	13	0	1	1	0	0	0	0	k__Fungi	p__Ascomycota	c__Leotiomycetes	o__Helotiales	f__unidentified_Helotiales	g__unidentified_Helotiales	s__unidentified_Helotiales	New.CleanUp.ReferenceOTU46057
OTU5582	0	0	0	0	0	1	0	3	0	0	0	0	0	0	0	0	3	0	0	0	0	0	0	0	2	40	0	0	0	1	0	0	0	0	0	0	k__Fungi	p__Ascomycota	c__Leotiomycetes	o__Helotiales	f__unidentified_Helotiales	g__unidentified_Helotiales	s__unidentified_Helotiales	SH018431.07FU_KF638551_reps
OTU5371	0	0	0	0	0	0	0	0	0	0	0	0	0	0	0	0	0	0	0	0	0	0	0	0	0	0	1	0	0	1	39	0	0	0	0	0	k__Fungi	p__Ascomycota	c__Leotiomycetes	o__Helotiales	f__unidentified_Helotiales	g__unidentified_Helotiales	s__unidentified_Helotiales	SH020846.07FU_JN655612_reps_singleton
OTU5904	0	0	5	0	0	0	0	0	0	0	0	0	0	14	0	0	0	0	0	0	0	0	0	0	2	1	0	1	0	0	0	6	9	0	1	1	k__Fungi	p__Ascomycota	c__Leotiomycetes	o__Helotiales	f__unidentified_Helotiales	g__unidentified_Helotiales	s__unidentified_Helotiales	SH013272.07FU_JF449506_reps
OTU5345	0	3	3	0	0	0	0	30	0	0	0	0	0	0	0	0	0	0	0	0	3	0	0	0	0	0	0	0	0	0	0	0	0	0	0	0	k__Fungi	p__Ascomycota	c__Leotiomycetes	o__Helotiales	f__unidentified_Helotiales	g__unidentified_Helotiales	s__unidentified_Helotiales	New.CleanUp.ReferenceOTU64274
OTU5346	0	0	0	0	0	0	0	0	0	0	24	15	0	0	0	0	0	0	0	0	0	0	0	0	0	0	0	0	0	0	0	0	0	0	0	0	k__Fungi	p__Ascomycota	c__Leotiomycetes	o__Helotiales	f__unidentified_Helotiales	g__unidentified_Helotiales	s__unidentified_Helotiales	New.CleanUp.ReferenceOTU78382
OTU5299	4	0	4	0	0	0	0	0	0	11	4	0	8	0	0	0	3	0	0	1	0	1	0	0	0	0	0	0	0	0	0	0	0	0	1	0	k__Fungi	p__Ascomycota	c__Leotiomycetes	o__Helotiales	f__unidentified_Helotiales	g__unidentified_Helotiales	s__unidentified_Helotiales	SH013006.07FU_KC965219_reps
OTU5347	0	0	0	0	0	0	14	5	0	6	0	0	0	0	0	0	0	0	0	0	2	2	0	0	0	0	0	0	0	0	0	0	7	1	0	0	k__Fungi	p__Ascomycota	c__Leotiomycetes	o__Helotiales	f__unidentified_Helotiales	g__unidentified_Helotiales	s__unidentified_Helotiales	New.CleanUp.ReferenceOTU98546
OTU5221	0	0	0	0	0	0	0	0	0	0	20	13	0	0	0	0	0	0	0	0	0	0	0	0	0	0	0	0	0	0	0	0	0	0	0	0	k__Fungi	p__Ascomycota	c__Leotiomycetes	o__Helotiales	f__unidentified_Helotiales	g__unidentified_Helotiales	s__unidentified_Helotiales	New.CleanUp.ReferenceOTU51328
OTU5310	0	0	3	0	0	0	0	0	0	0	0	0	0	5	0	0	4	2	7	0	0	0	0	0	0	5	0	0	0	0	0	6	0	0	0	0	k__Fungi	p__Ascomycota	c__Leotiomycetes	o__Helotiales	f__unidentified_Helotiales	g__unidentified_Helotiales	s__unidentified_Helotiales	New.CleanUp.ReferenceOTU99819
OTU5505	0	0	0	0	0	0	0	0	0	0	0	3	0	2	9	7	0	0	0	0	0	0	0	5	0	3	0	0	0	0	0	3	0	0	0	0	k__Fungi	p__Ascomycota	c__Leotiomycetes	o__Helotiales	f__unidentified_Helotiales	g__unidentified_Helotiales	s__unidentified_Helotiales	SH020406.07FU_EF029237_reps
OTU5172	0	0	0	0	0	0	0	4	0	0	18	9	0	0	0	0	0	0	0	0	0	0	0	0	0	0	0	0	0	0	0	0	0	0	0	0	k__Fungi	p__Ascomycota	c__Leotiomycetes	o__Helotiales	f__unidentified_Helotiales	g__unidentified_Helotiales	s__unidentified_Helotiales	New.CleanUp.ReferenceOTU87462
OTU5375	0	0	0	0	0	16	3	0	0	0	6	1	0	0	0	0	0	2	0	0	0	0	0	0	0	0	1	0	0	0	0	2	0	0	0	0	k__Fungi	p__Ascomycota	c__Leotiomycetes	o__Helotiales	f__unidentified_Helotiales	g__unidentified_Helotiales	s__unidentified_Helotiales	New.CleanUp.ReferenceOTU12011
OTU5151	0	0	0	0	0	0	0	0	0	0	26	4	0	0	0	0	0	0	0	0	0	0	0	0	0	0	0	0	0	0	0	0	0	0	0	0	k__Fungi	p__Ascomycota	c__Leotiomycetes	o__Helotiales	f__unidentified_Helotiales	g__unidentified_Helotiales	s__unidentified_Helotiales	New.CleanUp.ReferenceOTU98409
OTU5508	0	0	0	0	0	0	0	0	0	3	26	0	0	0	0	0	0	0	0	0	0	0	0	0	0	0	0	0	0	0	0	0	0	0	0	0	k__Fungi	p__Ascomycota	c__Leotiomycetes	o__Helotiales	f__unidentified_Helotiales	g__unidentified_Helotiales	s__unidentified_Helotiales	SH021630.07FU_JN655651_reps
OTU5200	0	0	0	0	0	2	0	0	0	0	1	1	0	0	0	3	0	1	0	0	0	0	0	0	0	0	0	0	0	0	0	0	17	0	0	3	k__Fungi	p__Ascomycota	c__Leotiomycetes	o__Helotiales	f__unidentified_Helotiales	g__unidentified_Helotiales	s__unidentified_Helotiales	New.CleanUp.ReferenceOTU116327
OTU5094	0	0	1	4	0	0	0	0	0	0	0	0	10	0	0	0	0	0	0	0	0	0	0	0	2	2	0	2	1	0	0	3	0	0	1	0	k__Fungi	p__Ascomycota	c__Leotiomycetes	o__Helotiales	f__unidentified_Helotiales	g__unidentified_Helotiales	s__unidentified_Helotiales	New.CleanUp.ReferenceOTU6316
OTU5189	0	0	0	2	0	0	1	0	0	0	0	0	0	4	0	0	0	0	0	8	0	0	0	0	0	5	0	0	1	0	3	0	0	2	0	0	k__Fungi	p__Ascomycota	c__Leotiomycetes	o__Helotiales	f__unidentified_Helotiales	g__unidentified_Helotiales	s__unidentified_Helotiales	SH003726.07FU_AF504840_reps
OTU5258	0	0	7	0	0	0	1	0	1	0	0	0	0	0	0	3	6	0	0	0	0	0	0	0	1	0	0	0	1	0	0	0	0	1	0	2	k__Fungi	p__Ascomycota	c__Leotiomycetes	o__Helotiales	f__unidentified_Helotiales	g__unidentified_Helotiales	s__unidentified_Helotiales	New.CleanUp.ReferenceOTU32876
OTU4905	0	0	0	0	0	0	0	0	0	0	16	6	0	0	0	0	0	0	0	0	0	0	0	0	0	0	0	0	0	0	0	0	0	0	0	0	k__Fungi	p__Ascomycota	c__Leotiomycetes	o__Helotiales	f__unidentified_Helotiales	g__unidentified_Helotiales	s__unidentified_Helotiales	New.CleanUp.ReferenceOTU106806
OTU5236	0	0	0	0	0	0	2	0	0	0	0	0	0	11	0	0	0	3	0	1	0	0	0	0	0	3	0	0	1	0	0	1	0	0	0	0	k__Fungi	p__Ascomycota	c__Leotiomycetes	o__Helotiales	f__unidentified_Helotiales	g__unidentified_Helotiales	s__unidentified_Helotiales	SH028076.07FU_JF449683_reps
OTU5115	0	0	0	0	14	0	0	0	0	0	4	3	0	0	0	0	0	0	0	0	0	0	0	0	0	0	0	0	0	0	0	0	0	0	0	0	k__Fungi	p__Ascomycota	c__Leotiomycetes	o__Helotiales	f__unidentified_Helotiales	g__unidentified_Helotiales	s__unidentified_Helotiales	New.CleanUp.ReferenceOTU15708
OTU4824	0	0	0	0	0	0	0	0	0	0	19	1	0	0	0	0	0	0	0	0	0	0	0	0	0	0	0	0	0	0	0	0	0	0	0	0	k__Fungi	p__Ascomycota	c__Leotiomycetes	o__Helotiales	f__unidentified_Helotiales	g__unidentified_Helotiales	s__unidentified_Helotiales	SH004578.07FU_JQ346946_reps
OTU4877	0	0	0	0	0	0	3	0	0	3	0	0	0	0	0	0	2	10	0	0	0	0	0	0	0	0	0	0	0	0	0	2	0	0	0	0	k__Fungi	p__Ascomycota	c__Leotiomycetes	o__Helotiales	f__unidentified_Helotiales	g__unidentified_Helotiales	s__unidentified_Helotiales	New.CleanUp.ReferenceOTU123350
OTU5198	4	0	0	0	0	0	0	0	0	0	0	0	0	0	0	0	0	0	1	5	0	0	0	0	4	0	0	0	0	0	6	0	0	0	0	0	k__Fungi	p__Ascomycota	c__Leotiomycetes	o__Helotiales	f__unidentified_Helotiales	g__unidentified_Helotiales	s__unidentified_Helotiales	New.CleanUp.ReferenceOTU95703
OTU4927	0	3	2	4	0	2	4	2	0	0	0	0	0	0	0	0	0	0	0	0	0	0	0	0	0	1	0	0	0	0	0	0	0	0	0	0	k__Fungi	p__Ascomycota	c__Leotiomycetes	o__Helotiales	f__unidentified_Helotiales	g__unidentified_Helotiales	s__unidentified_Helotiales	SH025343.07FU_FN812811_reps
OTU4450	0	0	0	0	0	0	0	0	0	0	0	13	0	0	0	0	0	0	0	0	0	0	0	0	0	0	0	0	0	0	0	0	0	0	0	0	k__Fungi	p__Ascomycota	c__Leotiomycetes	o__Helotiales	f__unidentified_Helotiales	g__unidentified_Helotiales	s__unidentified_Helotiales	SH018540.07FU_UDB020779_reps_singleton
OTU4370	0	0	5	0	0	0	0	0	0	0	0	0	0	0	0	0	0	4	0	0	0	0	0	0	0	1	0	0	0	0	0	2	0	0	0	0	k__Fungi	p__Ascomycota	c__Leotiomycetes	o__Helotiales	f__unidentified_Helotiales	g__unidentified_Helotiales	s__unidentified_Helotiales	SH028225.07FU_KF296725_reps_singleton
OTU4379	0	0	0	0	0	0	0	0	0	0	9	3	0	0	0	0	0	0	0	0	0	0	0	0	0	0	0	0	0	0	0	0	0	0	0	0	k__Fungi	p__Ascomycota	c__Leotiomycetes	o__Helotiales	f__unidentified_Helotiales	g__unidentified_Helotiales	s__unidentified_Helotiales	New.CleanUp.ReferenceOTU10544
OTU4290	0	0	0	0	0	0	0	0	0	0	0	0	0	0	0	0	0	0	0	0	0	0	0	0	0	0	0	1	6	3	0	0	0	0	0	0	k__Fungi	p__Ascomycota	c__Leotiomycetes	o__Helotiales	f__unidentified_Helotiales	g__unidentified_Helotiales	s__unidentified_Helotiales	New.CleanUp.ReferenceOTU149
OTU4372	0	0	0	0	0	0	3	0	0	0	0	0	0	0	0	0	0	0	0	0	0	0	0	0	2	2	0	0	0	0	3	0	0	0	0	0	k__Fungi	p__Ascomycota	c__Leotiomycetes	o__Helotiales	f__unidentified_Helotiales	g__unidentified_Helotiales	s__unidentified_Helotiales	SH004611.07FU_HE998713_reps_singleton
OTU4281	0	0	0	0	0	0	0	0	0	0	0	0	0	0	0	0	0	0	0	0	0	0	0	0	0	1	0	2	0	6	0	0	0	0	0	0	k__Fungi	p__Ascomycota	c__Leotiomycetes	o__Helotiales	f__unidentified_Helotiales	g__unidentified_Helotiales	s__unidentified_Helotiales	SH025350.07FU_AB712011_reps
OTU3941	0	0	0	0	0	0	0	0	0	0	0	0	0	0	0	6	1	0	0	0	0	0	0	0	1	0	0	0	0	0	0	0	0	0	0	0	k__Fungi	p__Ascomycota	c__Leotiomycetes	o__Helotiales	f__unidentified_Helotiales	g__unidentified_Helotiales	s__unidentified_Helotiales	New.ReferenceOTU360
OTU3963	0	0	0	0	0	0	0	0	0	0	0	0	0	0	0	0	0	0	0	0	0	0	0	0	0	0	0	0	0	0	0	0	0	0	0	8	k__Fungi	p__Ascomycota	c__Leotiomycetes	o__Helotiales	f__unidentified_Helotiales	g__unidentified_Helotiales	s__unidentified_Helotiales	New.CleanUp.ReferenceOTU53813
OTU4760	4	0	0	0	0	0	0	0	0	0	0	0	0	0	0	4	0	0	0	0	0	0	0	0	0	0	0	0	0	0	0	0	0	0	0	0	k__Fungi	p__Ascomycota	c__Leotiomycetes	o__Helotiales	f__unidentified_Helotiales	g__unidentified_Helotiales	s__unidentified_Helotiales	New.CleanUp.ReferenceOTU29912
OTU3776	0	0	0	0	0	0	0	0	0	0	0	0	0	0	0	0	0	0	0	0	0	0	0	7	0	0	0	0	0	0	0	0	0	0	0	0	k__Fungi	p__Ascomycota	c__Leotiomycetes	o__Helotiales	f__unidentified_Helotiales	g__unidentified_Helotiales	s__unidentified_Helotiales	SH015803.07FU_JN859270_refs
OTU4526	0	0	0	4	0	0	0	0	0	2	1	0	0	0	0	0	0	0	0	0	0	0	0	0	0	0	0	0	0	0	0	0	0	0	0	0	k__Fungi	p__Ascomycota	c__Leotiomycetes	o__Helotiales	f__unidentified_Helotiales	g__unidentified_Helotiales	s__unidentified_Helotiales	SH019906.07FU_GU166472_reps_singleton
[truncated: 4,932 more rows]
