# Supplementary material
Source: MDPI journal article supplement (https://www.mdpi.com/1999-4907/11/11/1153)
Supplement: s1 [file s1 › Table S8.xlsx]

## Sheet: Supplementary Table S8
Electronic Supplementary Material
Article title: Linking Tree Health, Rhizosphere Physicochemical Properties, and Microbiome in Acute Oak Decline
Journal name: Forests
Diogo Pinho1,2, Cristina Barroso1,3, Hugo Froufe1, Nathan Brown4, Elena Vanguelova4, Conceição Egas1,3, Sandra Denman4
1 Next Generation Sequencing Unit, UC-Biotech, Biocant Park, Núcleo 04 Lote 8, 3060-197 Cantanhede, Portugal
2 Department of Biology and CESAM, University of Aveiro, Campus Santiago, 3810-193 Aveiro, Portugal
3 Center for Neuroscience and Cell Biology, University of Coimbra, Rua Larga Faculdade de Medicina, Pólo I, 1st floor, 3004-504 Coimbra, Portugal
4 Forest Research, Centre for Ecology, Biosecurity and Society, Farnham, Surrey GU10 4LH, UK
Author for correspondence: Sandra Denman. Tel: +44 (0)300 067 5640. Email: sandra.denman@forestry.gsi.gov.uk
Supplementary Table S8 Differentially abundant OTUs between Eastnor-Hatchlands, Eastnor-Richmond, and Hathclands-Richmond

## Sheet: Eastnor vs Hatchalnds
Group	1H-E	2H-E	4H-E	5H-E	1AOD-E	2AOD-E	3AOD-E	4AOD-E	1H-H	3H-H	4H-H	5H-H	1AOD-H	2AOD-H	3AOD-H	5AOD-H	Kingdom	Phylum	Class	Order	Family	Genus	Species	OTU
OTU6964	7.91452e-05	4.70489e-05	0.000173468	0.000217081	0.00112296	0.000952485	0.00090474	0.000277662	2.6927e-05	0	0	0	1.4454e-05	0.000135465	2.0484e-05	2.63578e-05	k__Bacteria	p__Acidobacteria	c__Acidobacteriia	o__Acidobacteriales	f__Koribacteraceae	g__	s__	221708
OTU1618	3.95726e-05	2.35244e-05	0.000173468	0.00108541	0.00251544	8.16415e-05	0.00119045	0.00173539	4.03904e-05	8.88021e-05	4.44899e-05	0.000160886	0	2.25774e-05	3.07261e-05	3.95366e-05	k__Bacteria	p__Actinobacteria	c__Thermoleophilia	o__Gaiellales	f__Gaiellaceae	g__	s__	237139
OTU678	9.89315e-05	0.000658684	6.50505e-05	0.000372139	0.00224593	0.000843629	0.000499988	0.000115693	5.38539e-05	0	0	0	4.3362e-05	0.000203197	7.16941e-05	0	k__Bacteria	p__Chloroflexi	c__Ktedonobacteria	o__Ktedonobacterales	f__Ktedonobacteraceae	g__	s__	4479483
OTU47093	0.00015829	0.000164671	6.50505e-05	0.00058922	2.24593e-05	0.000326566	0	0.000485909	0	0	0	0	0	0	0	0	k__Bacteria	p__Chloroflexi	c__Ktedonobacteria	o__Ktedonobacterales	f__Ktedonobacteraceae	g__	s__	New.CleanUp.ReferenceOTU218450
OTU11735	0.000415512	0.000776306	0.000889024	0.002667	0.00220101	0.00035378	0.000785696	0.00270721	0.000107708	0	4.44899e-05	0	0	2.25774e-05	0.000297019	7.90733e-05	k__Bacteria	p__Planctomycetes	c__Phycisphaerae	o__WD2101	f__	g__	s__	New.ReferenceOTU1081
OTU11963	0.000316581	0.000282293	0.00036862	0.000713267	0.00062886	0.000163283	0.000119045	0.000231385	0.000121171	2.96007e-05	0	0	1.4454e-05	6.77323e-05	5.12101e-05	0.000105431	k__Bacteria	p__Planctomycetes	c__Phycisphaerae	o__WD2101	f__	g__	s__	New.ReferenceOTU346
OTU67676	0	0.000141147	0	3.10116e-05	0.000112296	0.000653132	0.00154758	2.31385e-05	0	0	0	0	0	0	0	0	k__Bacteria	p__Planctomycetes	c__Planctomycetia	o__Gemmatales	f__Isosphaeraceae	g__	s__	New.CleanUp.ReferenceOTU348569
OTU2259	0.000118718	0.000917453	4.3367e-05	0.00167463	0.00384054	8.16415e-05	0	6.94155e-05	0	0	0	0	0	9.03098e-05	0	0	k__Bacteria	p__Proteobacteria	c__Betaproteobacteria	o__Burkholderiales	f__Burkholderiaceae	g__Burkholderia	s__	156580
OTU11357	0	0	0	0	0	0	2.3809e-05	0	5.38539e-05	5.92014e-05	6.67349e-05	9.65313e-05	4.3362e-05	0.000158042	0.000174114	6.58944e-05	k__Bacteria	p__Actinobacteria	c__Actinobacteria	o__Actinomycetales	f__Mycobacteriaceae	g__Mycobacterium	s__	806333
OTU8276	0	0	0	0	0	2.72138e-05	0	4.6277e-05	0.000538539	5.92014e-05	0.00017796	0	0.000317988	9.03098e-05	0.000440407	0.000382187	k__Bacteria	p__Actinobacteria	c__Actinobacteria	o__Actinomycetales	f__Mycobacteriaceae	g__Mycobacterium	s__	4448095
OTU34642	0	0	4.3367e-05	0	0	0	0	0	0.000201952	2.96007e-05	0.000200205	3.21771e-05	0.000202356	9.03098e-05	0.000430165	0.000224041	k__Bacteria	p__Actinobacteria	c__Actinobacteria	o__Actinomycetales	f__Mycobacteriaceae	g__Mycobacterium	s__	New.CleanUp.ReferenceOTU140883
OTU4269	0.000178077	9.40977e-05	4.3367e-05	9.30348e-05	6.73779e-05	8.16415e-05	7.14269e-05	6.94155e-05	0.000296197	0.000148003	0.000244695	0.000482657	0.000187902	0.000948253	0.00025605	0.000527155	k__Bacteria	p__Firmicutes	c__Clostridia	o__Clostridiales	f__Clostridiaceae	g__	s__	189503
OTU36577	1.97863e-05	0	0	3.10116e-05	0	2.72138e-05	0	6.94155e-05	0.000215416	5.92014e-05	8.89798e-05	9.65313e-05	0.000274626	0.000451549	0.000163872	6.58944e-05	k__Bacteria	p__Proteobacteria	c__Betaproteobacteria	o__MND1	f__	g__	s__	New.CleanUp.ReferenceOTU153688

## Sheet: Eastnor vs Richmond
Group	1H-E	2H-E	4H-E	5H-E	1AOD-E	2AOD-E	3AOD-E	4AOD-E	1H-R	2H-R	4H-R	5H-R	1AOD-R	2AOD-R	3AOD-R	5AOD-R	Kingdom	Phylum	Class	Order	Family	Genus	Species	OTU		Kingdom;Phylum;Class;Order;Family;Genus;Species
OTU7699	3.95726e-05	2.35244e-05	0.000108418	0.000279104	2.24593e-05	8.16415e-05	2.3809e-05	4.6277e-05	0	0	0	0	0	0	0	0	k__Bacteria	p__Acidobacteria	c__[Chloracidobacteria]	o__Ellin7246	f__	g__	s__	4330994		k__Bacteria;p__Acidobacteria;c__[Chloracidobacteria];o__Ellin7246;f__;g__;s__
OTU8665	7.91452e-05	2.35244e-05	4.3367e-05	3.10116e-05	2.24593e-05	0	2.3809e-05	0.000115693	0	0	0	0	0	0	0	0	k__Bacteria	p__Acidobacteria	c__[Chloracidobacteria]	o__PK29	f__	g__	s__	732890		k__Bacteria;p__Acidobacteria;c__[Chloracidobacteria];o__PK29;f__;g__;s__
OTU17374	0.00015829	0.000258769	2.16835e-05	9.30348e-05	6.73779e-05	0	0	2.31385e-05	0	0	0	0	0	0	0	0	k__Bacteria	p__Acidobacteria	c__[Chloracidobacteria]	o__RB41	f__	g__	s__	New.CleanUp.ReferenceOTU30138		k__Bacteria;p__Acidobacteria;c__[Chloracidobacteria];o__RB41;f__;g__;s__
OTU9141	1.97863e-05	2.35244e-05	0.00036862	6.20232e-05	6.73779e-05	0	0.000142854	0.000786709	0	0	0	0	0	0	0	0	k__Bacteria	p__Acidobacteria	c__[Chloracidobacteria]	o__RB41	f__	g__	s__	2651008		k__Bacteria;p__Acidobacteria;c__[Chloracidobacteria];o__RB41;f__;g__;s__
OTU9789	0.00110803	0.00155261	0.00179973	0.00359735	0.00101067	2.72138e-05	0.000809505	0.00261465	0	0	0	0	0	0	0	0	k__Bacteria	p__Acidobacteria	c__[Chloracidobacteria]	o__RB41	f__	g__	s__	2406106		k__Bacteria;p__Acidobacteria;c__[Chloracidobacteria];o__RB41;f__;g__;s__
OTU175	0.00142461	0.00171728	0.000346936	0.00114743	8.98372e-05	0	2.3809e-05	0.000208247	0	0	0	0	0	0	0	0	k__Bacteria	p__Acidobacteria	c__[Chloracidobacteria]	o__RB41	f__	g__	s__	803238		k__Bacteria;p__Acidobacteria;c__[Chloracidobacteria];o__RB41;f__;g__;s__
OTU941	9.89315e-05	0.000776306	0.000346936	0.000372139	0.000494104	0	4.76179e-05	0	0	0	0	0	0	0	0	0	k__Bacteria	p__Acidobacteria	c__[Chloracidobacteria]	o__RB41	f__	g__	s__	683649		k__Bacteria;p__Acidobacteria;c__[Chloracidobacteria];o__RB41;f__;g__;s__
OTU6788	0.000831025	0.000141147	0.000346936	6.20232e-05	2.24593e-05	5.44277e-05	9.52358e-05	0.000347078	0	2.69027e-05	0	0	0	0	0	0	k__Bacteria	p__Acidobacteria	c__[Chloracidobacteria]	o__RB41	f__Ellin6075	g__	s__	4456633		k__Bacteria;p__Acidobacteria;c__[Chloracidobacteria];o__RB41;f__Ellin6075;g__;s__
OTU2313	3.95726e-05	9.40977e-05	0.000195152	6.20232e-05	0.000134756	0	0.000119045	0.000277662	0	0	0	0	0	0	0	0	k__Bacteria	p__Acidobacteria	c__[Chloracidobacteria]	o__RB41	f__Ellin6075	g__	s__	4445083		k__Bacteria;p__Acidobacteria;c__[Chloracidobacteria];o__RB41;f__Ellin6075;g__;s__
OTU8096	5.93589e-05	0.000188195	2.16835e-05	3.10116e-05	0.000157215	0	4.76179e-05	0.000115693	0	0	0	0	0	0	0	0	k__Bacteria	p__Acidobacteria	c__[Chloracidobacteria]	o__RB41	f__Ellin6075	g__	s__	4391597		k__Bacteria;p__Acidobacteria;c__[Chloracidobacteria];o__RB41;f__Ellin6075;g__;s__
OTU7840	0.000237436	0.00021172	0.000108418	3.10116e-05	2.24593e-05	0	4.76179e-05	2.31385e-05	0	0	0	0	0	0	0	0	k__Bacteria	p__Acidobacteria	c__[Chloracidobacteria]	o__RB41	f__Ellin6075	g__	s__	4340706		k__Bacteria;p__Acidobacteria;c__[Chloracidobacteria];o__RB41;f__Ellin6075;g__;s__
OTU4095	1.97863e-05	4.70489e-05	0.00123596	0.000806302	6.73779e-05	5.44277e-05	0.000523797	0.00118006	0	2.69027e-05	0	0	0	0	0	0	k__Bacteria	p__Acidobacteria	c__[Chloracidobacteria]	o__RB41	f__Ellin6075	g__	s__	1876538		k__Bacteria;p__Acidobacteria;c__[Chloracidobacteria];o__RB41;f__Ellin6075;g__;s__
OTU1826	0.000178077	4.70489e-05	0.000455354	6.20232e-05	0	0	2.3809e-05	6.94155e-05	0	0	0	0	0	0	0	0	k__Bacteria	p__Acidobacteria	c__[Chloracidobacteria]	o__RB41	f__Ellin6075	g__	s__	1105005		k__Bacteria;p__Acidobacteria;c__[Chloracidobacteria];o__RB41;f__Ellin6075;g__;s__
OTU8405	5.93589e-05	0.000164671	0.00117091	0.000372139	4.49186e-05	8.16415e-05	0.00069046	0.000879263	0	0	0	0	0	0	0	0	k__Bacteria	p__Acidobacteria	c__[Chloracidobacteria]	o__RB41	f__Ellin6075	g__	s__	593400		k__Bacteria;p__Acidobacteria;c__[Chloracidobacteria];o__RB41;f__Ellin6075;g__;s__
OTU4977	0.000316581	0.00190548	0.000737239	0.00096136	0.00107805	2.72138e-05	0.000261899	4.6277e-05	0	8.07081e-05	6.55151e-05	0	0	0	2.4785e-05	0.000146797	k__Bacteria	p__Acidobacteria	c__[Chloracidobacteria]	o__RB41	f__Ellin6075	g__	s__	246449		k__Bacteria;p__Acidobacteria;c__[Chloracidobacteria];o__RB41;f__Ellin6075;g__;s__
OTU2146	0.00110803	0.000564586	0.000477037	3.10116e-05	0.00103313	0.000244925	0.000547606	0.000856125	0	2.69027e-05	0	0	0	0	0	0	k__Bacteria	p__Acidobacteria	c__[Chloracidobacteria]	o__RB41	f__Ellin6075	g__	s__	209250		k__Bacteria;p__Acidobacteria;c__[Chloracidobacteria];o__RB41;f__Ellin6075;g__;s__
OTU2063	3.95726e-05	4.70489e-05	0.000281886	0.000372139	0.000112296	2.72138e-05	0.000261899	2.31385e-05	0	0	0	0	0	0	0	0	k__Bacteria	p__Acidobacteria	c__[Chloracidobacteria]	o__RB41	f__Ellin6075	g__	s__	141861		k__Bacteria;p__Acidobacteria;c__[Chloracidobacteria];o__RB41;f__Ellin6075;g__;s__
OTU4785	1.97863e-05	9.40977e-05	8.6734e-05	9.30348e-05	0.000202134	8.16415e-05	4.76179e-05	4.6277e-05	0	5.38054e-05	2.18384e-05	0	0	2.58545e-05	0	1.83496e-05	k__Bacteria	p__Acidobacteria	c__[Chloracidobacteria]	o__RB41	f__Ellin6075	g__	s__	113347		k__Bacteria;p__Acidobacteria;c__[Chloracidobacteria];o__RB41;f__Ellin6075;g__;s__
OTU3553	0.00037594	0.000141147	4.3367e-05	9.30348e-05	2.24593e-05	0	0	0.000115693	0	2.69027e-05	0	0	0	0	0	0	k__Bacteria	p__Acidobacteria	c__Acidobacteria-5	o__	f__	g__	s__	4467262		k__Bacteria;p__Acidobacteria;c__Acidobacteria-5;o__;f__;g__;s__
OTU6298	5.93589e-05	7.05733e-05	6.50505e-05	0.000124046	0	0	4.76179e-05	4.6277e-05	0	0	0	0	0	0	0	0	k__Bacteria	p__Acidobacteria	c__Acidobacteria-5	o__	f__	g__	s__	4402103		k__Bacteria;p__Acidobacteria;c__Acidobacteria-5;o__;f__;g__;s__
OTU11491	3.95726e-05	2.35244e-05	8.6734e-05	0.000279104	0.000179674	0.000190497	0.000142854	0.000347078	0	0	0	0	0	0	0	0	k__Bacteria	p__Acidobacteria	c__Acidobacteria-5	o__	f__	g__	s__	4401488		k__Bacteria;p__Acidobacteria;c__Acidobacteria-5;o__;f__;g__;s__
OTU5163	0.00176098	0.00301113	0.00327421	0.0021398	0.00116788	0.000380994	0.00183329	0.00423435	0	0	0	0	0	0	0	0	k__Bacteria	p__Acidobacteria	c__Acidobacteria-5	o__	f__	g__	s__	4392804		k__Bacteria;p__Acidobacteria;c__Acidobacteria-5;o__;f__;g__;s__
OTU9272	0.000356154	0.000329342	6.50505e-05	0.000155058	8.98372e-05	0.000108855	0.000214281	0.00016197	0	0	4.36767e-05	2.08372e-05	0	0	4.957e-05	0	k__Bacteria	p__Acidobacteria	c__Acidobacteria-5	o__	f__	g__	s__	4019171		k__Bacteria;p__Acidobacteria;c__Acidobacteria-5;o__;f__;g__;s__
OTU5923	9.89315e-05	4.70489e-05	0.000238519	0.000372139	0	0	2.3809e-05	0.00016197	0	8.07081e-05	2.18384e-05	2.08372e-05	0	0	2.4785e-05	1.83496e-05	k__Bacteria	p__Acidobacteria	c__Acidobacteria-5	o__	f__	g__	s__	755077		k__Bacteria;p__Acidobacteria;c__Acidobacteria-5;o__;f__;g__;s__
OTU4675	0.000296795	0.000588111	0.000628822	0.000465174	2.24593e-05	0	2.3809e-05	9.2554e-05	0	0	0	0	0	0	0	0	k__Bacteria	p__Acidobacteria	c__Acidobacteria-5	o__	f__	g__	s__	646030		k__Bacteria;p__Acidobacteria;c__Acidobacteria-5;o__;f__;g__;s__
OTU3861	5.93589e-05	0.000117622	2.16835e-05	0.000124046	4.49186e-05	0.000217711	9.52358e-05	0.00016197	0	0	0	0	0	0	0	0	k__Bacteria	p__Acidobacteria	c__Acidobacteria-5	o__	f__	g__	s__	354337		k__Bacteria;p__Acidobacteria;c__Acidobacteria-5;o__;f__;g__;s__
OTU3481	0.000257222	0.00042344	0.000151785	0.00018607	0	0	2.3809e-05	4.6277e-05	0	0	0	0	0	0	0	0	k__Bacteria	p__Acidobacteria	c__Acidobacteria-5	o__	f__	g__	s__	255838		k__Bacteria;p__Acidobacteria;c__Acidobacteria-5;o__;f__;g__;s__
OTU5346	3.95726e-05	4.70489e-05	0.000108418	0.000341128	0.000112296	0.000108855	7.14269e-05	0.000300801	0	0	0	0	0	0	0	0	k__Bacteria	p__Acidobacteria	c__Acidobacteria-5	o__	f__	g__	s__	250533		k__Bacteria;p__Acidobacteria;c__Acidobacteria-5;o__;f__;g__;s__
OTU10704	5.93589e-05	9.40977e-05	2.16835e-05	3.10116e-05	6.73779e-05	0	0	4.6277e-05	0	2.69027e-05	0	0	0	0	0	0	k__Bacteria	p__Acidobacteria	c__Acidobacteria-6	o__CCU21	f__	g__	s__	4408363		k__Bacteria;p__Acidobacteria;c__Acidobacteria-6;o__CCU21;f__;g__;s__
OTU8448	0.00108825	0.000893928	0.000845657	0.000496186	0	0	0	2.31385e-05	0	0	0	0	0	0	0	0	k__Bacteria	p__Acidobacteria	c__Acidobacteria-6	o__CCU21	f__	g__	s__	2068089		k__Bacteria;p__Acidobacteria;c__Acidobacteria-6;o__CCU21;f__;g__;s__
OTU9027	0.000217649	2.35244e-05	0.000823973	6.20232e-05	0	0	4.76179e-05	4.6277e-05	0	0	0	0	0	0	0	0	k__Bacteria	p__Acidobacteria	c__Acidobacteria-6	o__CCU21	f__	g__	s__	357743		k__Bacteria;p__Acidobacteria;c__Acidobacteria-6;o__CCU21;f__;g__;s__
OTU12297	0.000138504	0.000117622	0.000260202	0.00018607	0.000112296	0	7.14269e-05	9.2554e-05	0	0	0	0	0	0	0	0	k__Bacteria	p__Acidobacteria	c__Acidobacteria-6	o__iii1-15	f__	g__	s__	New.ReferenceOTU947		k__Bacteria;p__Acidobacteria;c__Acidobacteria-6;o__iii1-15;f__;g__;s__
OTU11575	0	2.35244e-05	0.000173468	0.000124046	0.000202134	0	7.14269e-05	9.2554e-05	0	0	0	0	0	0	0	0	k__Bacteria	p__Acidobacteria	c__Acidobacteria-6	o__iii1-15	f__	g__	s__	New.ReferenceOTU735		k__Bacteria;p__Acidobacteria;c__Acidobacteria-6;o__iii1-15;f__;g__;s__
OTU12247	9.89315e-05	7.05733e-05	4.3367e-05	3.10116e-05	8.98372e-05	0	2.3809e-05	0.000185108	0	0	0	0	0	0	0	0	k__Bacteria	p__Acidobacteria	c__Acidobacteria-6	o__iii1-15	f__	g__	s__	New.ReferenceOTU129		k__Bacteria;p__Acidobacteria;c__Acidobacteria-6;o__iii1-15;f__;g__;s__
OTU13859	3.95726e-05	0.000117622	0.000195152	6.20232e-05	0	0	9.52358e-05	0.00016197	0	0	0	0	0	0	0	0	k__Bacteria	p__Acidobacteria	c__Acidobacteria-6	o__iii1-15	f__	g__	s__	New.CleanUp.ReferenceOTU8856		k__Bacteria;p__Acidobacteria;c__Acidobacteria-6;o__iii1-15;f__;g__;s__
OTU24659	0	0.000141147	6.50505e-05	6.20232e-05	0.000179674	0.00100691	0.000547606	0.000277662	0	0	0	0	0	0	2.4785e-05	0	k__Bacteria	p__Acidobacteria	c__Acidobacteria-6	o__iii1-15	f__	g__	s__	New.CleanUp.ReferenceOTU75665		k__Bacteria;p__Acidobacteria;c__Acidobacteria-6;o__iii1-15;f__;g__;s__
OTU23102	0	9.40977e-05	0.000130101	0.000124046	0	2.72138e-05	0	2.31385e-05	0	0	0	0	0	0	0	0	k__Bacteria	p__Acidobacteria	c__Acidobacteria-6	o__iii1-15	f__	g__	s__	New.CleanUp.ReferenceOTU65798		k__Bacteria;p__Acidobacteria;c__Acidobacteria-6;o__iii1-15;f__;g__;s__
OTU22612	5.93589e-05	0.000282293	0.000390303	0.000155058	0	0	2.3809e-05	4.6277e-05	0	0	0	0	0	0	0	0	k__Bacteria	p__Acidobacteria	c__Acidobacteria-6	o__iii1-15	f__	g__	s__	New.CleanUp.ReferenceOTU62557		k__Bacteria;p__Acidobacteria;c__Acidobacteria-6;o__iii1-15;f__;g__;s__
OTU51272	0	4.70489e-05	0.000477037	0.00018607	0	0	4.76179e-05	0.000138831	0	0	0	0	0	0	0	0	k__Bacteria	p__Acidobacteria	c__Acidobacteria-6	o__iii1-15	f__	g__	s__	New.CleanUp.ReferenceOTU244259		k__Bacteria;p__Acidobacteria;c__Acidobacteria-6;o__iii1-15;f__;g__;s__
OTU8008	1.97863e-05	9.40977e-05	0.000108418	0.000217081	2.24593e-05	0	2.3809e-05	9.2554e-05	0	0	0	0	0	0	0	0	k__Bacteria	p__Acidobacteria	c__Acidobacteria-6	o__iii1-15	f__	g__	s__	4472087		k__Bacteria;p__Acidobacteria;c__Acidobacteria-6;o__iii1-15;f__;g__;s__
OTU2711	1.97863e-05	7.05733e-05	8.6734e-05	0	0	8.16415e-05	0	0.000115693	0	0	0	0	0	0	0	0	k__Bacteria	p__Acidobacteria	c__Acidobacteria-6	o__iii1-15	f__	g__	s__	4468097		k__Bacteria;p__Acidobacteria;c__Acidobacteria-6;o__iii1-15;f__;g__;s__
OTU2400	0.00104867	0.000988026	0.000672189	0.000155058	0.000134756	0	0.000333325	0.000254524	0	0	0	0	0	0	0	0	k__Bacteria	p__Acidobacteria	c__Acidobacteria-6	o__iii1-15	f__	g__	s__	4463632		k__Bacteria;p__Acidobacteria;c__Acidobacteria-6;o__iii1-15;f__;g__;s__
OTU6937	0.000217649	0.000329342	0.000607138	0.000558209	0.000404267	0.000163283	0.000595224	0.000347078	5.27315e-05	0.000134513	0	0	0	7.75635e-05	0	0	k__Bacteria	p__Acidobacteria	c__Acidobacteria-6	o__iii1-15	f__	g__	s__	4453467		k__Bacteria;p__Acidobacteria;c__Acidobacteria-6;o__iii1-15;f__;g__;s__
OTU1555	0	4.70489e-05	0.0018431	0.00182968	0.000247052	0.000870843	0.000214281	0.00279976	0	0	0	0	0	0	0	0	k__Bacteria	p__Acidobacteria	c__Acidobacteria-6	o__iii1-15	f__	g__	s__	4451407		k__Bacteria;p__Acidobacteria;c__Acidobacteria-6;o__iii1-15;f__;g__;s__
OTU1232	0.000633162	0.000399915	0.000780606	0.000558209	0.000112296	0.000217711	0.000285707	0.00134203	0	2.69027e-05	0	0	0	0	0	3.66993e-05	k__Bacteria	p__Acidobacteria	c__Acidobacteria-6	o__iii1-15	f__	g__	s__	4446106		k__Bacteria;p__Acidobacteria;c__Acidobacteria-6;o__iii1-15;f__;g__;s__
OTU8343	0.000178077	0.00185843	0.000498721	0.000217081	0	0	0	0.00016197	0	0	0	0	0	0	0	0	k__Bacteria	p__Acidobacteria	c__Acidobacteria-6	o__iii1-15	f__	g__	s__	4442148		k__Bacteria;p__Acidobacteria;c__Acidobacteria-6;o__iii1-15;f__;g__;s__
OTU9610	0.00134547	0.00143499	0.00114923	0.000155058	0	2.72138e-05	9.52358e-05	0.000254524	0	5.38054e-05	0	0	0	0	0	0	k__Bacteria	p__Acidobacteria	c__Acidobacteria-6	o__iii1-15	f__	g__	s__	4442074		k__Bacteria;p__Acidobacteria;c__Acidobacteria-6;o__iii1-15;f__;g__;s__
OTU10166	0.000494658	0.000658684	0.000823973	0.000527197	0.00031443	0.000408208	4.76179e-05	0.00101809	2.63657e-05	0.000107611	0	0	0	0	0	0	k__Bacteria	p__Acidobacteria	c__Acidobacteria-6	o__iii1-15	f__	g__	s__	4425901		k__Bacteria;p__Acidobacteria;c__Acidobacteria-6;o__iii1-15;f__;g__;s__
OTU3282	3.95726e-05	4.70489e-05	0.000173468	0.000248093	0.00031443	0.0011702	0.000499988	0.000115693	0	0.000107611	4.36767e-05	0	0	0.000129272	0	0.000110098	k__Bacteria	p__Acidobacteria	c__Acidobacteria-6	o__iii1-15	f__	g__	s__	4424785		k__Bacteria;p__Acidobacteria;c__Acidobacteria-6;o__iii1-15;f__;g__;s__
OTU11494	0.000435299	0.000823355	0.000455354	0.000496186	4.49186e-05	0	0.000142854	0.000740432	0	0	0	0	0	0	0	0	k__Bacteria	p__Acidobacteria	c__Acidobacteria-6	o__iii1-15	f__	g__	s__	4401482		k__Bacteria;p__Acidobacteria;c__Acidobacteria-6;o__iii1-15;f__;g__;s__
OTU10508	0.00368025	0.00181138	0.00160458	0.000744278	0.000471645	0.000979698	0.00109521	0.000740432	0	0	2.18384e-05	0	0	0	2.4785e-05	0	k__Bacteria	p__Acidobacteria	c__Acidobacteria-6	o__iii1-15	f__	g__	s__	4393662		k__Bacteria;p__Acidobacteria;c__Acidobacteria-6;o__iii1-15;f__;g__;s__
OTU3254	9.89315e-05	0.000376391	0	3.10116e-05	6.73779e-05	5.44277e-05	0.000190472	9.2554e-05	0	2.69027e-05	0	0	0	0	0	0	k__Bacteria	p__Acidobacteria	c__Acidobacteria-6	o__iii1-15	f__	g__	s__	4386443		k__Bacteria;p__Acidobacteria;c__Acidobacteria-6;o__iii1-15;f__;g__;s__
OTU1416	0.00112782	9.40977e-05	0.00125764	0.000806302	0.000539023	5.44277e-05	0.000333325	0.00171225	0	0	0	0	0	0	0	0	k__Bacteria	p__Acidobacteria	c__Acidobacteria-6	o__iii1-15	f__	g__	s__	4374733		k__Bacteria;p__Acidobacteria;c__Acidobacteria-6;o__iii1-15;f__;g__;s__
OTU4235	0.000257222	4.70489e-05	0.000281886	6.20232e-05	2.24593e-05	2.72138e-05	2.3809e-05	0.00016197	0	0	0	0	0	0	0	0	k__Bacteria	p__Acidobacteria	c__Acidobacteria-6	o__iii1-15	f__	g__	s__	4373459		k__Bacteria;p__Acidobacteria;c__Acidobacteria-6;o__iii1-15;f__;g__;s__
OTU2408	0.000890384	0.000541062	2.16835e-05	9.30348e-05	0	0	7.14269e-05	9.2554e-05	0	0	0	0	0	0	0	0	k__Bacteria	p__Acidobacteria	c__Acidobacteria-6	o__iii1-15	f__	g__	s__	4369842		k__Bacteria;p__Acidobacteria;c__Acidobacteria-6;o__iii1-15;f__;g__;s__
OTU4667	0.000277008	0.000611635	0.000130101	0.000682255	0	0	0.000190472	0.000439632	2.63657e-05	0	0	0	0	0	0	0	k__Bacteria	p__Acidobacteria	c__Acidobacteria-6	o__iii1-15	f__	g__	s__	4361801		k__Bacteria;p__Acidobacteria;c__Acidobacteria-6;o__iii1-15;f__;g__;s__
OTU9252	0.000217649	0.000658684	0.00138774	6.20232e-05	0.000179674	2.72138e-05	0.000190472	0.000809848	0	2.69027e-05	2.18384e-05	0	0	0	0	0	k__Bacteria	p__Acidobacteria	c__Acidobacteria-6	o__iii1-15	f__	g__	s__	4361133		k__Bacteria;p__Acidobacteria;c__Acidobacteria-6;o__iii1-15;f__;g__;s__
OTU9747	0.000237436	0.000305818	0.000390303	0.000434162	0.000157215	0.000190497	4.76179e-05	0.000439632	0	5.38054e-05	0	0	0	0	0	0	k__Bacteria	p__Acidobacteria	c__Acidobacteria-6	o__iii1-15	f__	g__	s__	4354842		k__Bacteria;p__Acidobacteria;c__Acidobacteria-6;o__iii1-15;f__;g__;s__
OTU11268	0.000118718	9.40977e-05	2.16835e-05	6.20232e-05	4.49186e-05	0	2.3809e-05	0.000138831	0	0.000107611	0	0	0	0	2.4785e-05	0	k__Bacteria	p__Acidobacteria	c__Acidobacteria-6	o__iii1-15	f__	g__	s__	4334886		k__Bacteria;p__Acidobacteria;c__Acidobacteria-6;o__iii1-15;f__;g__;s__
OTU5389	0.00114761	0.001929	0.000758923	0.000341128	0.000134756	2.72138e-05	2.3809e-05	0	0	0	0	0	0	0	0	0	k__Bacteria	p__Acidobacteria	c__Acidobacteria-6	o__iii1-15	f__	g__	s__	4334725		k__Bacteria;p__Acidobacteria;c__Acidobacteria-6;o__iii1-15;f__;g__;s__
OTU4932	0.000831025	0.000329342	0.000693872	0.000124046	0	0	0.000119045	9.2554e-05	0	0	0	0	0	0	0	0	k__Bacteria	p__Acidobacteria	c__Acidobacteria-6	o__iii1-15	f__	g__	s__	4330047		k__Bacteria;p__Acidobacteria;c__Acidobacteria-6;o__iii1-15;f__;g__;s__
OTU5419	0.000455085	0.000188195	0.000260202	0.000124046	0	0	2.3809e-05	2.31385e-05	0	0	0	0	0	0	0	0	k__Bacteria	p__Acidobacteria	c__Acidobacteria-6	o__iii1-15	f__	g__	s__	4091471		k__Bacteria;p__Acidobacteria;c__Acidobacteria-6;o__iii1-15;f__;g__;s__
OTU2478	0.00267115	0.00324637	0.00377293	0.00136451	4.49186e-05	8.16415e-05	0.000499988	0.00143459	0	0.000107611	4.36767e-05	0	2.41645e-05	0	0	1.83496e-05	k__Bacteria	p__Acidobacteria	c__Acidobacteria-6	o__iii1-15	f__	g__	s__	4024062		k__Bacteria;p__Acidobacteria;c__Acidobacteria-6;o__iii1-15;f__;g__;s__
OTU3097	0.00591611	0.000352866	4.3367e-05	0.000124046	0	0	7.14269e-05	0	0	0	0	0	0	0	0	0	k__Bacteria	p__Acidobacteria	c__Acidobacteria-6	o__iii1-15	f__	g__	s__	4024061		k__Bacteria;p__Acidobacteria;c__Acidobacteria-6;o__iii1-15;f__;g__;s__
OTU407	0.000633162	0.000282293	0.000260202	6.20232e-05	2.24593e-05	0	2.3809e-05	0.00016197	0	0	0	0	0	0	0	0	k__Bacteria	p__Acidobacteria	c__Acidobacteria-6	o__iii1-15	f__	g__	s__	3036442		k__Bacteria;p__Acidobacteria;c__Acidobacteria-6;o__iii1-15;f__;g__;s__
OTU9058	0.00377918	0.000799831	0.000693872	0.000155058	4.49186e-05	0	0	4.6277e-05	2.63657e-05	0	0	0	0	0	0	0	k__Bacteria	p__Acidobacteria	c__Acidobacteria-6	o__iii1-15	f__	g__	s__	2733663		k__Bacteria;p__Acidobacteria;c__Acidobacteria-6;o__iii1-15;f__;g__;s__
OTU4725	7.91452e-05	7.05733e-05	8.6734e-05	0.000124046	6.73779e-05	0	0	2.31385e-05	0	0	0	0	0	0	0	0	k__Bacteria	p__Acidobacteria	c__Acidobacteria-6	o__iii1-15	f__	g__	s__	2352981		k__Bacteria;p__Acidobacteria;c__Acidobacteria-6;o__iii1-15;f__;g__;s__
OTU9377	0.0013059	0.00150556	0.00338263	0.00353532	0.000561482	5.44277e-05	0.00045237	0.00229071	0	0	0	0	0	0	0	0	k__Bacteria	p__Acidobacteria	c__Acidobacteria-6	o__iii1-15	f__	g__	s__	2340297		k__Bacteria;p__Acidobacteria;c__Acidobacteria-6;o__iii1-15;f__;g__;s__
OTU2444	0.000415512	2.35244e-05	8.6734e-05	0.000372139	0.000561482	2.72138e-05	0.000166663	0.000347078	0	0	0	0	0	0	0	0	k__Bacteria	p__Acidobacteria	c__Acidobacteria-6	o__iii1-15	f__	g__	s__	1967615		k__Bacteria;p__Acidobacteria;c__Acidobacteria-6;o__iii1-15;f__;g__;s__
OTU5817	0.000217649	0.00131737	0.000303569	0.00179867	0.00096575	0	0.000595224	0.000277662	0	0	0	0	0	0	0	0	k__Bacteria	p__Acidobacteria	c__Acidobacteria-6	o__iii1-15	f__	g__	s__	1785533		k__Bacteria;p__Acidobacteria;c__Acidobacteria-6;o__iii1-15;f__;g__;s__
OTU2718	0.00310645	0.0080924	0.0103213	0.0121255	0.00294217	0.00269417	0.00045237	0.00923226	0	5.38054e-05	6.55151e-05	0	2.41645e-05	0.000465381	2.4785e-05	9.17482e-05	k__Bacteria	p__Acidobacteria	c__Acidobacteria-6	o__iii1-15	f__	g__	s__	1722698		k__Bacteria;p__Acidobacteria;c__Acidobacteria-6;o__iii1-15;f__;g__;s__
OTU1248	9.89315e-05	0.000282293	2.16835e-05	0.000341128	0.00103313	0	0.000214281	0.000185108	0	5.38054e-05	0	0	0	0	0	0	k__Bacteria	p__Acidobacteria	c__Acidobacteria-6	o__iii1-15	f__	g__	s__	1126015		k__Bacteria;p__Acidobacteria;c__Acidobacteria-6;o__iii1-15;f__;g__;s__
OTU3145	0	4.70489e-05	0.000130101	0	0.000112296	5.44277e-05	0.000190472	0.000185108	0	0	0	0	0	0	0	0	k__Bacteria	p__Acidobacteria	c__Acidobacteria-6	o__iii1-15	f__	g__	s__	1107738		k__Bacteria;p__Acidobacteria;c__Acidobacteria-6;o__iii1-15;f__;g__;s__
OTU6059	0.00114761	0.000588111	0.000281886	6.20232e-05	0	0	4.76179e-05	0	0	0	0	0	0	0	0	0	k__Bacteria	p__Acidobacteria	c__Acidobacteria-6	o__iii1-15	f__	g__	s__	823439		k__Bacteria;p__Acidobacteria;c__Acidobacteria-6;o__iii1-15;f__;g__;s__
OTU9363	0.000296795	0.000164671	0.000737239	0.000651244	0.000179674	2.72138e-05	0.000285707	0.00016197	0	0	0	0	0	0	0	0	k__Bacteria	p__Acidobacteria	c__Acidobacteria-6	o__iii1-15	f__	g__	s__	823292		k__Bacteria;p__Acidobacteria;c__Acidobacteria-6;o__iii1-15;f__;g__;s__
OTU10953	0.000118718	2.35244e-05	0.000195152	0.000124046	8.98372e-05	0.000299352	0.000190472	0.000485909	0	2.69027e-05	0	0	0	0	0	0	k__Bacteria	p__Acidobacteria	c__Acidobacteria-6	o__iii1-15	f__	g__	s__	818286		k__Bacteria;p__Acidobacteria;c__Acidobacteria-6;o__iii1-15;f__;g__;s__
OTU4934	0.000217649	9.40977e-05	0.000303569	3.10116e-05	0	0	4.76179e-05	0.000115693	0	0	0	0	0	0	0	0	k__Bacteria	p__Acidobacteria	c__Acidobacteria-6	o__iii1-15	f__	g__	s__	816505		k__Bacteria;p__Acidobacteria;c__Acidobacteria-6;o__iii1-15;f__;g__;s__
OTU2264	0.000178077	0.000352866	0.000715556	3.10116e-05	0.000157215	0	0.000142854	0.000393355	0	0	0	0	0	0	0	0	k__Bacteria	p__Acidobacteria	c__Acidobacteria-6	o__iii1-15	f__	g__	s__	811187		k__Bacteria;p__Acidobacteria;c__Acidobacteria-6;o__iii1-15;f__;g__;s__
OTU9306	1.97863e-05	0.000282293	4.3367e-05	0.00018607	6.73779e-05	0	0.000261899	0.000971817	0	0	0	0	0	0	0	0	k__Bacteria	p__Acidobacteria	c__Acidobacteria-6	o__iii1-15	f__	g__	s__	806689		k__Bacteria;p__Acidobacteria;c__Acidobacteria-6;o__iii1-15;f__;g__;s__
OTU2975	0.000652948	0.00112917	0.000997441	0.000434162	2.24593e-05	0	0.000309516	0.00136517	0	0	0	0	0	0	0	0	k__Bacteria	p__Acidobacteria	c__Acidobacteria-6	o__iii1-15	f__	g__	s__	798646		k__Bacteria;p__Acidobacteria;c__Acidobacteria-6;o__iii1-15;f__;g__;s__
OTU7791	0.00263158	0.00190548	0.00140943	0.000372139	0	0	4.76179e-05	0.000208247	0	2.69027e-05	0	2.08372e-05	0	0	0	0	k__Bacteria	p__Acidobacteria	c__Acidobacteria-6	o__iii1-15	f__	g__	s__	791504		k__Bacteria;p__Acidobacteria;c__Acidobacteria-6;o__iii1-15;f__;g__;s__
OTU6215	1.97863e-05	0.000517537	2.16835e-05	0.000155058	0	0	4.76179e-05	9.2554e-05	0	0	0	0	0	0	0	0	k__Bacteria	p__Acidobacteria	c__Acidobacteria-6	o__iii1-15	f__	g__	s__	783801		k__Bacteria;p__Acidobacteria;c__Acidobacteria-6;o__iii1-15;f__;g__;s__
OTU2855	0.000118718	2.35244e-05	0.000346936	0.000403151	2.24593e-05	0	7.14269e-05	0.000323939	0	0	0	0	0	0	0	0	k__Bacteria	p__Acidobacteria	c__Acidobacteria-6	o__iii1-15	f__	g__	s__	763448		k__Bacteria;p__Acidobacteria;c__Acidobacteria-6;o__iii1-15;f__;g__;s__
OTU7438	0.000336367	0.000964502	0.00104081	0.000992371	0.000494104	0.000435422	0.000785696	0.00104123	2.63657e-05	0	4.36767e-05	0	0	0	0	1.83496e-05	k__Bacteria	p__Acidobacteria	c__Acidobacteria-6	o__iii1-15	f__	g__	s__	748070		k__Bacteria;p__Acidobacteria;c__Acidobacteria-6;o__iii1-15;f__;g__;s__
OTU9210	0.000178077	0.000117622	0.000130101	9.30348e-05	0.000202134	5.44277e-05	0.000190472	2.31385e-05	0	2.69027e-05	2.18384e-05	0	0	0	0	0	k__Bacteria	p__Acidobacteria	c__Acidobacteria-6	o__iii1-15	f__	g__	s__	728640		k__Bacteria;p__Acidobacteria;c__Acidobacteria-6;o__iii1-15;f__;g__;s__
OTU4290	0.000257222	2.35244e-05	0.000108418	9.30348e-05	2.24593e-05	0	7.14269e-05	0.000185108	0	0	0	0	0	0	0	0	k__Bacteria	p__Acidobacteria	c__Acidobacteria-6	o__iii1-15	f__	g__	s__	723493		k__Bacteria;p__Acidobacteria;c__Acidobacteria-6;o__iii1-15;f__;g__;s__
OTU2518	0.00124654	0.000776306	0.000672189	0.000496186	0.000157215	5.44277e-05	0.000190472	0.000254524	0	0	0	0	0	0	0	0	k__Bacteria	p__Acidobacteria	c__Acidobacteria-6	o__iii1-15	f__	g__	s__	714738		k__Bacteria;p__Acidobacteria;c__Acidobacteria-6;o__iii1-15;f__;g__;s__
OTU8704	1.97863e-05	2.35244e-05	6.50505e-05	9.30348e-05	6.73779e-05	0	9.52358e-05	9.2554e-05	0	0	0	0	0	0	0	0	k__Bacteria	p__Acidobacteria	c__Acidobacteria-6	o__iii1-15	f__	g__	s__	707755		k__Bacteria;p__Acidobacteria;c__Acidobacteria-6;o__iii1-15;f__;g__;s__
OTU10069	0.00136526	0.0010586	0.000455354	0.000496186	0.000112296	0.000136069	0.000333325	0.000208247	0	2.69027e-05	6.55151e-05	0	0	0	2.4785e-05	0	k__Bacteria	p__Acidobacteria	c__Acidobacteria-6	o__iii1-15	f__	g__	s__	703224		k__Bacteria;p__Acidobacteria;c__Acidobacteria-6;o__iii1-15;f__;g__;s__
OTU113	0.00108825	0.00155261	0.00245024	0.00114743	6.73779e-05	0.000789202	0.000119045	0.00148086	0	0	0	0	0	0	0	0	k__Bacteria	p__Acidobacteria	c__Acidobacteria-6	o__iii1-15	f__	g__	s__	698417		k__Bacteria;p__Acidobacteria;c__Acidobacteria-6;o__iii1-15;f__;g__;s__
OTU5042	9.89315e-05	9.40977e-05	0.000151785	0.000217081	8.98372e-05	5.44277e-05	2.3809e-05	4.6277e-05	0	0	0	0	0	0	0	0	k__Bacteria	p__Acidobacteria	c__Acidobacteria-6	o__iii1-15	f__	g__	s__	689024		k__Bacteria;p__Acidobacteria;c__Acidobacteria-6;o__iii1-15;f__;g__;s__
OTU3595	0.000138504	0.000752782	8.6734e-05	0.000806302	0.000269512	0.00035378	0.00069046	0.00215188	0	0	0	0	0	0	2.4785e-05	0	k__Bacteria	p__Acidobacteria	c__Acidobacteria-6	o__iii1-15	f__	g__	s__	661235		k__Bacteria;p__Acidobacteria;c__Acidobacteria-6;o__iii1-15;f__;g__;s__
OTU3323	0.000633162	0.0011527	0.000498721	0.00291509	0.00406513	0.0025581	0.0031904	0.00418807	7.90972e-05	0.000564957	0.000327575	2.08372e-05	0	7.75635e-05	0.00019828	0.000201846	k__Bacteria	p__Acidobacteria	c__Acidobacteria-6	o__iii1-15	f__	g__	s__	571709		k__Bacteria;p__Acidobacteria;c__Acidobacteria-6;o__iii1-15;f__;g__;s__
OTU5835	0.000178077	0.000446964	0.000455354	0.000279104	6.73779e-05	0	4.76179e-05	4.6277e-05	0	0	0	0	0	2.58545e-05	0	1.83496e-05	k__Bacteria	p__Acidobacteria	c__Acidobacteria-6	o__iii1-15	f__	g__	s__	564526		k__Bacteria;p__Acidobacteria;c__Acidobacteria-6;o__iii1-15;f__;g__;s__
OTU10254	0.00180055	0.00112917	0.000130101	0.000217081	6.73779e-05	0.000163283	2.3809e-05	0.00016197	0	0	0	0	0	0	0	1.83496e-05	k__Bacteria	p__Acidobacteria	c__Acidobacteria-6	o__iii1-15	f__	g__	s__	368890		k__Bacteria;p__Acidobacteria;c__Acidobacteria-6;o__iii1-15;f__;g__;s__
OTU7106	7.91452e-05	4.70489e-05	0.000151785	0.000155058	0	0	0	6.94155e-05	0	0	0	0	0	0	0	0	k__Bacteria	p__Acidobacteria	c__Acidobacteria-6	o__iii1-15	f__	g__	s__	361764		k__Bacteria;p__Acidobacteria;c__Acidobacteria-6;o__iii1-15;f__;g__;s__
OTU5924	5.93589e-05	0.000564586	0.000954074	0.000527197	8.98372e-05	0	7.14269e-05	0	0	0	0	0	0	0	0	0	k__Bacteria	p__Acidobacteria	c__Acidobacteria-6	o__iii1-15	f__	g__	s__	352324		k__Bacteria;p__Acidobacteria;c__Acidobacteria-6;o__iii1-15;f__;g__;s__
OTU1530	0.000474871	0.000305818	0.000390303	0.000248093	6.73779e-05	0	0	4.6277e-05	0	0	0	0	0	0	0	0	k__Bacteria	p__Acidobacteria	c__Acidobacteria-6	o__iii1-15	f__	g__	s__	348270		k__Bacteria;p__Acidobacteria;c__Acidobacteria-6;o__iii1-15;f__;g__;s__
OTU4038	0	0.000117622	0.000108418	0	0.000112296	0	4.76179e-05	0.000138831	0	0	2.18384e-05	0	0	2.58545e-05	0	0	k__Bacteria	p__Acidobacteria	c__Acidobacteria-6	o__iii1-15	f__	g__	s__	338196		k__Bacteria;p__Acidobacteria;c__Acidobacteria-6;o__iii1-15;f__;g__;s__
OTU2002	0.000118718	7.05733e-05	2.16835e-05	9.30348e-05	0	0	0	0.000115693	0	0	0	0	0	0	0	0	k__Bacteria	p__Acidobacteria	c__Acidobacteria-6	o__iii1-15	f__	g__	s__	324357		k__Bacteria;p__Acidobacteria;c__Acidobacteria-6;o__iii1-15;f__;g__;s__
OTU7243	3.95726e-05	0.000517537	8.6734e-05	0.00018607	6.73779e-05	0	0.000166663	4.6277e-05	0	2.69027e-05	0	0	0	0	0	0	k__Bacteria	p__Acidobacteria	c__Acidobacteria-6	o__iii1-15	f__	g__	s__	321991		k__Bacteria;p__Acidobacteria;c__Acidobacteria-6;o__iii1-15;f__;g__;s__
OTU6466	0.000138504	2.35244e-05	0.000672189	3.10116e-05	0	0	0.000333325	0.00113379	0	0	0	0	0	0	0	0	k__Bacteria	p__Acidobacteria	c__Acidobacteria-6	o__iii1-15	f__	g__	s__	319420		k__Bacteria;p__Acidobacteria;c__Acidobacteria-6;o__iii1-15;f__;g__;s__
OTU1818	9.89315e-05	0.000117622	0.000281886	3.10116e-05	4.49186e-05	0	0.000214281	0.000277662	0	2.69027e-05	0	0	0	0	2.4785e-05	1.83496e-05	k__Bacteria	p__Acidobacteria	c__Acidobacteria-6	o__iii1-15	f__	g__	s__	316541		k__Bacteria;p__Acidobacteria;c__Acidobacteria-6;o__iii1-15;f__;g__;s__
OTU2016	1.97863e-05	0.000729257	0.00119259	0.000527197	0	0	0	0.000485909	0	0	0	0	0	0	0	0	k__Bacteria	p__Acidobacteria	c__Acidobacteria-6	o__iii1-15	f__	g__	s__	313245		k__Bacteria;p__Acidobacteria;c__Acidobacteria-6;o__iii1-15;f__;g__;s__
OTU2858	5.93589e-05	0.000141147	0.000130101	0	2.24593e-05	2.72138e-05	4.76179e-05	0.000115693	0	0	0	0	0	0	0	0	k__Bacteria	p__Acidobacteria	c__Acidobacteria-6	o__iii1-15	f__	g__	s__	226487		k__Bacteria;p__Acidobacteria;c__Acidobacteria-6;o__iii1-15;f__;g__;s__
OTU4817	0.000455085	0.000729257	0.000281886	3.10116e-05	0	0	0.000142854	0.000370216	0	0	0	0	0	0	0	0	k__Bacteria	p__Acidobacteria	c__Acidobacteria-6	o__iii1-15	f__	g__	s__	226288		k__Bacteria;p__Acidobacteria;c__Acidobacteria-6;o__iii1-15;f__;g__;s__
OTU3416	3.95726e-05	7.05733e-05	0.000910707	0.00142653	0.00125772	5.44277e-05	0.000261899	0.00143459	0	5.38054e-05	2.18384e-05	0	2.41645e-05	0.000103418	2.4785e-05	3.66993e-05	k__Bacteria	p__Acidobacteria	c__Acidobacteria-6	o__iii1-15	f__	g__	s__	225522		k__Bacteria;p__Acidobacteria;c__Acidobacteria-6;o__iii1-15;f__;g__;s__
OTU10343	7.91452e-05	4.70489e-05	0.000108418	9.30348e-05	8.98372e-05	8.16415e-05	0.000380943	0.000138831	0	0	0	0	0	0	0	0	k__Bacteria	p__Acidobacteria	c__Acidobacteria-6	o__iii1-15	f__	g__	s__	218467		k__Bacteria;p__Acidobacteria;c__Acidobacteria-6;o__iii1-15;f__;g__;s__
OTU2267	0.00124654	0.000682208	0.00036862	6.20232e-05	2.24593e-05	0	2.3809e-05	0	0	0	0	0	0	0	0	0	k__Bacteria	p__Acidobacteria	c__Acidobacteria-6	o__iii1-15	f__	g__	s__	212676		k__Bacteria;p__Acidobacteria;c__Acidobacteria-6;o__iii1-15;f__;g__;s__
OTU1199	0.000949743	0.000494013	0.000563771	0.00018607	0.000988209	0.00138791	0.00164282	0.000185108	0	0.000161416	8.73534e-05	0	2.41645e-05	0	0	0	k__Bacteria	p__Acidobacteria	c__Acidobacteria-6	o__iii1-15	f__	g__	s__	211678		k__Bacteria;p__Acidobacteria;c__Acidobacteria-6;o__iii1-15;f__;g__;s__
OTU6550	0.000217649	4.70489e-05	0.000997441	0.000651244	8.98372e-05	0	4.76179e-05	4.6277e-05	0	0	0	0	0	0	0	0	k__Bacteria	p__Acidobacteria	c__Acidobacteria-6	o__iii1-15	f__	g__	s__	151517		k__Bacteria;p__Acidobacteria;c__Acidobacteria-6;o__iii1-15;f__;g__;s__
OTU1184	0.00116739	0.00148204	0.000173468	0.00105439	0.000336889	0.000380994	0.000523797	0.000115693	2.63657e-05	5.38054e-05	0	0	0	7.75635e-05	2.4785e-05	5.50489e-05	k__Bacteria	p__Acidobacteria	c__Acidobacteria-6	o__iii1-15	f__	g__	s__	113271		k__Bacteria;p__Acidobacteria;c__Acidobacteria-6;o__iii1-15;f__;g__;s__
OTU3711	0.000652948	0.000329342	0.000693872	0.00018607	2.24593e-05	0	0.000190472	0.00016197	0	0	0	0	0	0	0	0	k__Bacteria	p__Acidobacteria	c__Acidobacteria-6	o__iii1-15	f__	g__	s__	113191		k__Bacteria;p__Acidobacteria;c__Acidobacteria-6;o__iii1-15;f__;g__;s__
OTU9996	0.00326474	0.0060693	0.000520404	0.00514793	0.000808535	5.44277e-05	0.000999976	0.00381785	0	0	4.36767e-05	0	0	0	0	3.66993e-05	k__Bacteria	p__Acidobacteria	c__Acidobacteria-6	o__iii1-15	f__	g__	s__	89699		k__Bacteria;p__Acidobacteria;c__Acidobacteria-6;o__iii1-15;f__;g__;s__
OTU8832	0.000257222	0.000541062	2.16835e-05	0.000124046	2.24593e-05	0	0	0.000115693	0	0	0	0	0	0	0	0	k__Bacteria	p__Acidobacteria	c__Acidobacteria-6	o__iii1-15	f__	g__	s__	89144		k__Bacteria;p__Acidobacteria;c__Acidobacteria-6;o__iii1-15;f__;g__;s__
OTU37952	0.000217649	0.000258769	0.000780606	0.000279104	0	0	4.76179e-05	0	0	0	0	0	0	0	0	0	k__Bacteria	p__Acidobacteria	c__Acidobacteria-6	o__iii1-15	f__mb2424	g__	s__	New.CleanUp.ReferenceOTU162737		k__Bacteria;p__Acidobacteria;c__Acidobacteria-6;o__iii1-15;f__mb2424;g__;s__
OTU5982	0.00162248	0.000305818	0.000238519	3.10116e-05	2.24593e-05	2.72138e-05	7.14269e-05	2.31385e-05	0	0	0	0	0	0	0	0	k__Bacteria	p__Acidobacteria	c__Acidobacteria-6	o__iii1-15	f__mb2424	g__	s__	810882		k__Bacteria;p__Acidobacteria;c__Acidobacteria-6;o__iii1-15;f__mb2424;g__;s__
OTU6458	0.000652948	0.000541062	0.00080229	3.10116e-05	4.49186e-05	2.72138e-05	0.000428561	0.000347078	2.63657e-05	2.69027e-05	0	0	0	0	0	1.83496e-05	k__Bacteria	p__Acidobacteria	c__Acidobacteria-6	o__iii1-15	f__mb2424	g__	s__	809354		k__Bacteria;p__Acidobacteria;c__Acidobacteria-6;o__iii1-15;f__mb2424;g__;s__
OTU11572	0.000356154	0.000305818	0.00114923	0.000744278	0	0	0.000119045	0.000740432	0	2.69027e-05	0	0	0	0	0	0	k__Bacteria	p__Acidobacteria	c__Acidobacteria-6	o__iii1-15	f__RB40	g__	s__	New.ReferenceOTU732		k__Bacteria;p__Acidobacteria;c__Acidobacteria-6;o__iii1-15;f__RB40;g__;s__
OTU12382	0.000178077	0.000188195	8.6734e-05	0.000434162	6.73779e-05	0	0.000261899	0.000763571	0	2.69027e-05	0	0	0	0	0	0	k__Bacteria	p__Acidobacteria	c__Acidobacteria-6	o__iii1-15	f__RB40	g__	s__	New.ReferenceOTU188		k__Bacteria;p__Acidobacteria;c__Acidobacteria-6;o__iii1-15;f__RB40;g__;s__
OTU53858	1.97863e-05	0	8.6734e-05	0.000124046	2.24593e-05	0	0.000142854	0.000416493	0	0	0	0	0	0	0	0	k__Bacteria	p__Acidobacteria	c__Acidobacteria-6	o__iii1-15	f__RB40	g__	s__	New.CleanUp.ReferenceOTU260164		k__Bacteria;p__Acidobacteria;c__Acidobacteria-6;o__iii1-15;f__RB40;g__;s__
OTU44629	0	2.35244e-05	8.6734e-05	0.000124046	0.000112296	0	2.3809e-05	6.94155e-05	0	0	0	0	0	0	0	0	k__Bacteria	p__Acidobacteria	c__Acidobacteria-6	o__iii1-15	f__RB40	g__	s__	New.CleanUp.ReferenceOTU203176		k__Bacteria;p__Acidobacteria;c__Acidobacteria-6;o__iii1-15;f__RB40;g__;s__
OTU2426	0.00128611	0.00157614	0.00114923	3.10116e-05	0	8.16415e-05	7.14269e-05	6.94155e-05	0	0	0	0	0	0	0	0	k__Bacteria	p__Acidobacteria	c__Acidobacteria-6	o__iii1-15	f__RB40	g__	s__	4481156		k__Bacteria;p__Acidobacteria;c__Acidobacteria-6;o__iii1-15;f__RB40;g__;s__
OTU3551	0.000692521	4.70489e-05	0.00114923	0.000527197	0.000134756	0.000380994	0.000428561	0.000763571	0	2.69027e-05	0	0	0	5.1709e-05	0	0	k__Bacteria	p__Acidobacteria	c__Acidobacteria-6	o__iii1-15	f__RB40	g__	s__	4467260		k__Bacteria;p__Acidobacteria;c__Acidobacteria-6;o__iii1-15;f__RB40;g__;s__
OTU5451	0.000356154	0.000729257	0.000303569	0.00102338	8.98372e-05	2.72138e-05	0.000404752	0.000138831	0	0	0	0	0	0	0	0	k__Bacteria	p__Acidobacteria	c__Acidobacteria-6	o__iii1-15	f__RB40	g__	s__	4429453		k__Bacteria;p__Acidobacteria;c__Acidobacteria-6;o__iii1-15;f__RB40;g__;s__
OTU7842	7.91452e-05	7.05733e-05	0.000477037	9.30348e-05	6.73779e-05	0	0.000166663	0.000485909	0	0	0	0	0	0	0	0	k__Bacteria	p__Acidobacteria	c__Acidobacteria-6	o__iii1-15	f__RB40	g__	s__	4372503		k__Bacteria;p__Acidobacteria;c__Acidobacteria-6;o__iii1-15;f__RB40;g__;s__
OTU2407	9.89315e-05	0.000141147	0.00114923	0.000403151	0.000157215	0.000108855	0.000404752	0.000971817	0	8.07081e-05	0	0	0	0	0	0	k__Bacteria	p__Acidobacteria	c__Acidobacteria-6	o__iii1-15	f__RB40	g__	s__	4369843		k__Bacteria;p__Acidobacteria;c__Acidobacteria-6;o__iii1-15;f__RB40;g__;s__
OTU7315	0.00278987	0.00134089	0.000455354	0.000341128	6.73779e-05	5.44277e-05	0.000642842	0.000370216	0	2.69027e-05	0	0	0	0	0	0	k__Bacteria	p__Acidobacteria	c__Acidobacteria-6	o__iii1-15	f__RB40	g__	s__	4368625		k__Bacteria;p__Acidobacteria;c__Acidobacteria-6;o__iii1-15;f__RB40;g__;s__
OTU967	0	0.000117622	0.00106249	3.10116e-05	0	0.000435422	2.3809e-05	0.000809848	0	0	0	0	0	0	0	0	k__Bacteria	p__Acidobacteria	c__Acidobacteria-6	o__iii1-15	f__RB40	g__	s__	4351273		k__Bacteria;p__Acidobacteria;c__Acidobacteria-6;o__iii1-15;f__RB40;g__;s__
OTU5662	7.91452e-05	4.70489e-05	6.50505e-05	6.20232e-05	4.49186e-05	5.44277e-05	7.14269e-05	0.00016197	0	0	0	0	0	0	0	0	k__Bacteria	p__Acidobacteria	c__Acidobacteria-6	o__iii1-15	f__RB40	g__	s__	3755711		k__Bacteria;p__Acidobacteria;c__Acidobacteria-6;o__iii1-15;f__RB40;g__;s__
OTU1779	0.00075188	0.000588111	0.00143111	0.000651244	0	0	9.52358e-05	0.000971817	0	2.69027e-05	0	0	0	0	0	0	k__Bacteria	p__Acidobacteria	c__Acidobacteria-6	o__iii1-15	f__RB40	g__	s__	3053116		k__Bacteria;p__Acidobacteria;c__Acidobacteria-6;o__iii1-15;f__RB40;g__;s__
OTU492	0.000277008	0.000329342	0.000325253	0.000124046	0	0	0.000142854	0.00016197	0	0	0	0	0	0	0	0	k__Bacteria	p__Acidobacteria	c__Acidobacteria-6	o__iii1-15	f__RB40	g__	s__	2127554		k__Bacteria;p__Acidobacteria;c__Acidobacteria-6;o__iii1-15;f__RB40;g__;s__
OTU486	0.000712307	0.000446964	0.000173468	9.30348e-05	0	0	0	2.31385e-05	0	0	0	0	0	0	0	0	k__Bacteria	p__Acidobacteria	c__Acidobacteria-6	o__iii1-15	f__RB40	g__	s__	1902952		k__Bacteria;p__Acidobacteria;c__Acidobacteria-6;o__iii1-15;f__RB40;g__;s__
OTU9222	0.000178077	7.05733e-05	0.000303569	0.00018607	0	5.44277e-05	0.000214281	0.000323939	0	2.69027e-05	0	0	0	2.58545e-05	0	0	k__Bacteria	p__Acidobacteria	c__Acidobacteria-6	o__iii1-15	f__RB40	g__	s__	858813		k__Bacteria;p__Acidobacteria;c__Acidobacteria-6;o__iii1-15;f__RB40;g__;s__
OTU2597	0.000277008	0.000188195	0.000563771	0.000124046	0	0	4.76179e-05	0.000555324	0	0	0	0	0	0	0	0	k__Bacteria	p__Acidobacteria	c__Acidobacteria-6	o__iii1-15	f__RB40	g__	s__	772651		k__Bacteria;p__Acidobacteria;c__Acidobacteria-6;o__iii1-15;f__RB40;g__;s__
OTU4769	0.000455085	0.000564586	0.00114923	0.000217081	0	0	0.000309516	0.000115693	0	0	0	0	0	0	0	0	k__Bacteria	p__Acidobacteria	c__Acidobacteria-6	o__iii1-15	f__RB40	g__	s__	671757		k__Bacteria;p__Acidobacteria;c__Acidobacteria-6;o__iii1-15;f__RB40;g__;s__
OTU4679	5.93589e-05	0.000141147	0.000303569	9.30348e-05	2.24593e-05	2.72138e-05	0.000166663	0.000138831	0	2.69027e-05	0	0	0	0	0	1.83496e-05	k__Bacteria	p__Acidobacteria	c__Acidobacteria-6	o__iii1-15	f__RB40	g__	s__	666413		k__Bacteria;p__Acidobacteria;c__Acidobacteria-6;o__iii1-15;f__RB40;g__;s__
OTU11425	0.000415512	0.000188195	8.6734e-05	0.000124046	0	2.72138e-05	9.52358e-05	0.000138831	0	0	0	0	0	0	0	0	k__Bacteria	p__Acidobacteria	c__Acidobacteria-6	o__iii1-15	f__RB40	g__	s__	113782		k__Bacteria;p__Acidobacteria;c__Acidobacteria-6;o__iii1-15;f__RB40;g__;s__
OTU1764	1.97863e-05	9.40977e-05	0	9.30348e-05	0.000247052	0.000979698	0.00045237	4.6277e-05	2.63657e-05	0	0	0	0	0	0	0	k__Bacteria	p__Acidobacteria	c__Acidobacteriia	o__Acidobacteriales	f__Acidobacteriaceae	g__	s__	4430568		k__Bacteria;p__Acidobacteria;c__Acidobacteriia;o__Acidobacteriales;f__Acidobacteriaceae;g__;s__
OTU2929	0.000138504	0.000494013	0.000628822	0.000372139	0.00031443	0.000108855	0.000880931	0.00134203	0.000158194	0.000242124	0.00039309	0.000166698	0.000652442	0.000180981	0.00029742	0.000330293	k__Bacteria	p__Acidobacteria	c__Acidobacteriia	o__Acidobacteriales	f__Acidobacteriaceae	g__	s__	4401025		k__Bacteria;p__Acidobacteria;c__Acidobacteriia;o__Acidobacteriales;f__Acidobacteriaceae;g__;s__
OTU1171	5.93589e-05	0.000611635	0	0.000155058	0.000381808	0.00138791	0.00145235	0.000323939	5.27315e-05	0	6.55151e-05	4.16745e-05	0.000169152	0.000155127	7.4355e-05	9.17482e-05	k__Bacteria	p__Acidobacteria	c__Acidobacteriia	o__Acidobacteriales	f__Acidobacteriaceae	g__	s__	1145745		k__Bacteria;p__Acidobacteria;c__Acidobacteriia;o__Acidobacteriales;f__Acidobacteriaceae;g__;s__
OTU1535	0.00053423	0.00181138	0.00143111	0.00207778	0.00923077	0.00337452	0.00421419	0.00155028	0.000105463	0.000591859	0.000764342	0.00112521	4.8329e-05	0.000620508	0.000123925	0.000844083	k__Bacteria	p__Acidobacteria	c__Acidobacteriia	o__Acidobacteriales	f__Acidobacteriaceae	g__	s__	1130140		k__Bacteria;p__Acidobacteria;c__Acidobacteriia;o__Acidobacteriales;f__Acidobacteriaceae;g__;s__
OTU4878	0	9.40977e-05	2.16835e-05	3.10116e-05	0.000134756	0.00144233	0.000499988	0.000185108	0	0	0.000458605	4.16745e-05	2.41645e-05	5.1709e-05	4.957e-05	0.000128447	k__Bacteria	p__Acidobacteria	c__Acidobacteriia	o__Acidobacteriales	f__Acidobacteriaceae	g__	s__	1110562		k__Bacteria;p__Acidobacteria;c__Acidobacteriia;o__Acidobacteriales;f__Acidobacteriaceae;g__;s__
OTU8361	0.00128611	0.00388153	0.000346936	0.000558209	0.00123526	0.000326566	0.000833313	0.000809848	5.27315e-05	0.000134513	4.36767e-05	0	7.24935e-05	0.000310254	0	0.000275245	k__Bacteria	p__Acidobacteria	c__Acidobacteriia	o__Acidobacteriales	f__Acidobacteriaceae	g__Edaphobacter	s__modestum	1130952		k__Bacteria;p__Acidobacteria;c__Acidobacteriia;o__Acidobacteriales;f__Acidobacteriaceae;g__Edaphobacter;s__modestum
OTU2712	0	9.40977e-05	6.50505e-05	0	0.000583942	0.000462635	0.000190472	0.00016197	0	0	0	0	0	0	0	0	k__Bacteria	p__Acidobacteria	c__Acidobacteriia	o__Acidobacteriales	f__Koribacteraceae	g__	s__	4468095		k__Bacteria;p__Acidobacteria;c__Acidobacteriia;o__Acidobacteriales;f__Koribacteraceae;g__;s__
OTU3283	0	0.000376391	0.000520404	0.00344229	0.000112296	0.00204104	0.000785696	0.00279976	0	0.000161416	8.73534e-05	0	2.41645e-05	5.1709e-05	0.000421345	7.33985e-05	k__Bacteria	p__Acidobacteria	c__Acidobacteriia	o__Acidobacteriales	f__Koribacteraceae	g__	s__	4424782		k__Bacteria;p__Acidobacteria;c__Acidobacteriia;o__Acidobacteriales;f__Koribacteraceae;g__;s__
OTU3766	0	4.70489e-05	0	3.10116e-05	0.00175182	0.000489849	0.000333325	0.000485909	0	0	0	0	0	0	0	0	k__Bacteria	p__Acidobacteria	c__Acidobacteriia	o__Acidobacteriales	f__Koribacteraceae	g__	s__	4367783		k__Bacteria;p__Acidobacteria;c__Acidobacteriia;o__Acidobacteriales;f__Koribacteraceae;g__;s__
OTU5706	0	0.000164671	2.16835e-05	6.20232e-05	0.000134756	2.72138e-05	0.000166663	2.31385e-05	0	0	0	0	0	0	0	0	k__Bacteria	p__Acidobacteria	c__Acidobacteriia	o__Acidobacteriales	f__Koribacteraceae	g__	s__	4360582		k__Bacteria;p__Acidobacteria;c__Acidobacteriia;o__Acidobacteriales;f__Koribacteraceae;g__;s__
OTU3656	3.95726e-05	7.05733e-05	0.000325253	6.20232e-05	8.98372e-05	8.16415e-05	0.000214281	0.000809848	0	0	0	0	0	0	0	1.83496e-05	k__Bacteria	p__Acidobacteria	c__Acidobacteriia	o__Acidobacteriales	f__Koribacteraceae	g__	s__	4341561		k__Bacteria;p__Acidobacteria;c__Acidobacteriia;o__Acidobacteriales;f__Koribacteraceae;g__;s__
OTU4987	9.89315e-05	0.00263474	0.000195152	0.00232587	0.00408759	0.014124	0.00461894	0.00391041	0	0.000376638	0.00115743	0.000187535	0.000314139	0.000103418	2.4785e-05	0.000954181	k__Bacteria	p__Acidobacteria	c__Acidobacteriia	o__Acidobacteriales	f__Koribacteraceae	g__	s__	4314933		k__Bacteria;p__Acidobacteria;c__Acidobacteriia;o__Acidobacteriales;f__Koribacteraceae;g__;s__
OTU1903	0	4.70489e-05	4.3367e-05	0.000248093	0.00101067	0.000517063	0.00045237	0.000208247	0	2.69027e-05	2.18384e-05	8.3349e-05	0	2.58545e-05	2.4785e-05	1.83496e-05	k__Bacteria	p__Acidobacteria	c__Acidobacteriia	o__Acidobacteriales	f__Koribacteraceae	g__	s__	3163059		k__Bacteria;p__Acidobacteria;c__Acidobacteriia;o__Acidobacteriales;f__Koribacteraceae;g__;s__
OTU1827	3.95726e-05	4.70489e-05	0.000173468	3.10116e-05	8.98372e-05	5.44277e-05	0.000214281	4.6277e-05	2.63657e-05	2.69027e-05	0	0	0	0	0	1.83496e-05	k__Bacteria	p__Acidobacteria	c__Acidobacteriia	o__Acidobacteriales	f__Koribacteraceae	g__	s__	2329278		k__Bacteria;p__Acidobacteria;c__Acidobacteriia;o__Acidobacteriales;f__Koribacteraceae;g__;s__
OTU4503	0	0	0.000108418	3.10116e-05	0.000269512	0.000244925	0.000404752	2.31385e-05	0	0	0	0	0	0	0	0	k__Bacteria	p__Acidobacteria	c__Acidobacteriia	o__Acidobacteriales	f__Koribacteraceae	g__	s__	1857346		k__Bacteria;p__Acidobacteria;c__Acidobacteriia;o__Acidobacteriales;f__Koribacteraceae;g__;s__
OTU9816	0	0.000117622	4.3367e-05	3.10116e-05	0	0.000843629	0.000119045	0.00016197	0	0	0	0	0	0	0	0	k__Bacteria	p__Acidobacteria	c__Acidobacteriia	o__Acidobacteriales	f__Koribacteraceae	g__	s__	1130896		k__Bacteria;p__Acidobacteria;c__Acidobacteriia;o__Acidobacteriales;f__Koribacteraceae;g__;s__
OTU817	0	7.05733e-05	0.000151785	0.000155058	2.24593e-05	2.72138e-05	9.52358e-05	4.6277e-05	0	0	0	0	0	0	0	0	k__Bacteria	p__Acidobacteria	c__Acidobacteriia	o__Acidobacteriales	f__Koribacteraceae	g__	s__	1123519		k__Bacteria;p__Acidobacteria;c__Acidobacteriia;o__Acidobacteriales;f__Koribacteraceae;g__;s__
OTU8219	0	0.000188195	0.000195152	3.10116e-05	0.000112296	0.00144233	0.000571415	0.000948679	0	0	0	0	0	0	0	0	k__Bacteria	p__Acidobacteria	c__Acidobacteriia	o__Acidobacteriales	f__Koribacteraceae	g__	s__	791077		k__Bacteria;p__Acidobacteria;c__Acidobacteriia;o__Acidobacteriales;f__Koribacteraceae;g__;s__
OTU3447	0.000178077	0.000258769	0.000238519	3.10116e-05	6.73779e-05	0.000326566	0.000261899	2.31385e-05	0	0	0	0	0	0	0	0	k__Bacteria	p__Acidobacteria	c__Acidobacteriia	o__Acidobacteriales	f__Koribacteraceae	g__	s__	789730		k__Bacteria;p__Acidobacteria;c__Acidobacteriia;o__Acidobacteriales;f__Koribacteraceae;g__;s__
OTU4982	1.97863e-05	2.35244e-05	6.50505e-05	3.10116e-05	0.000157215	0.000108855	0	4.6277e-05	0	0	0	0	0	0	0	0	k__Bacteria	p__Acidobacteria	c__Acidobacteriia	o__Acidobacteriales	f__Koribacteraceae	g__	s__	665808		k__Bacteria;p__Acidobacteria;c__Acidobacteriia;o__Acidobacteriales;f__Koribacteraceae;g__;s__
OTU5483	5.93589e-05	9.40977e-05	0.000520404	0.000155058	2.24593e-05	0.000190497	0.000547606	2.31385e-05	0	2.69027e-05	2.18384e-05	0	0	0	0	0	k__Bacteria	p__Acidobacteria	c__Acidobacteriia	o__Acidobacteriales	f__Koribacteraceae	g__	s__	634032		k__Bacteria;p__Acidobacteria;c__Acidobacteriia;o__Acidobacteriales;f__Koribacteraceae;g__;s__
OTU2541	0	2.35244e-05	0.000151785	0.000124046	6.73779e-05	0.000136069	0.000142854	6.94155e-05	0	0	0	0	0	0	0	0	k__Bacteria	p__Acidobacteria	c__Acidobacteriia	o__Acidobacteriales	f__Koribacteraceae	g__	s__	521208		k__Bacteria;p__Acidobacteria;c__Acidobacteriia;o__Acidobacteriales;f__Koribacteraceae;g__;s__
OTU6363	0.000455085	0.000258769	0.000758923	0.000248093	6.73779e-05	0	2.3809e-05	0.000277662	0	0	0	0	0	0	0	0	k__Bacteria	p__Acidobacteria	c__Acidobacteriia	o__Acidobacteriales	f__Koribacteraceae	g__	s__	354224		k__Bacteria;p__Acidobacteria;c__Acidobacteriia;o__Acidobacteriales;f__Koribacteraceae;g__;s__
OTU9761	0	0.00021172	2.16835e-05	0	0.000247052	0.00144233	0.000761887	0	0	0	6.55151e-05	6.25117e-05	0	0.000129272	4.957e-05	3.66993e-05	k__Bacteria	p__Acidobacteria	c__Acidobacteriia	o__Acidobacteriales	f__Koribacteraceae	g__	s__	291945		k__Bacteria;p__Acidobacteria;c__Acidobacteriia;o__Acidobacteriales;f__Koribacteraceae;g__;s__
OTU4657	0	0	8.6734e-05	0.000372139	0.000134756	0.000517063	0.00121426	0.000786709	0	0	0	0	0	0	0	0	k__Bacteria	p__Acidobacteria	c__Acidobacteriia	o__Acidobacteriales	f__Koribacteraceae	g__	s__	224638		k__Bacteria;p__Acidobacteria;c__Acidobacteriia;o__Acidobacteriales;f__Koribacteraceae;g__;s__
OTU2043	0	4.70489e-05	4.3367e-05	0.000248093	0.000471645	0.000734774	0.000999976	0.000832986	0	0	0	0	0	0	0	0	k__Bacteria	p__Acidobacteria	c__Acidobacteriia	o__Acidobacteriales	f__Koribacteraceae	g__	s__	222074		k__Bacteria;p__Acidobacteria;c__Acidobacteriia;o__Acidobacteriales;f__Koribacteraceae;g__;s__
OTU6964	7.91452e-05	4.70489e-05	0.000173468	0.000217081	0.000112296	0.000952485	0.00090474	0.000277662	0	0	0	0	0	0	0	0	k__Bacteria	p__Acidobacteria	c__Acidobacteriia	o__Acidobacteriales	f__Koribacteraceae	g__	s__	221708		k__Bacteria;p__Acidobacteria;c__Acidobacteriia;o__Acidobacteriales;f__Koribacteraceae;g__;s__
OTU10711	0	0.000188195	0	3.10116e-05	0.000426727	0.000326566	0.000309516	0.000185108	0	2.69027e-05	2.18384e-05	8.3349e-05	0	0	0	0	k__Bacteria	p__Acidobacteria	c__Acidobacteriia	o__Acidobacteriales	f__Koribacteraceae	g__	s__	220721		k__Bacteria;p__Acidobacteria;c__Acidobacteriia;o__Acidobacteriales;f__Koribacteraceae;g__;s__
OTU288	0	4.70489e-05	2.16835e-05	0	0.000336889	0.00375551	0.000833313	0.000185108	0	0	4.36767e-05	0	0	0	0	0	k__Bacteria	p__Acidobacteria	c__Acidobacteriia	o__Acidobacteriales	f__Koribacteraceae	g__	s__	215113		k__Bacteria;p__Acidobacteria;c__Acidobacteriia;o__Acidobacteriales;f__Koribacteraceae;g__;s__
OTU2582	0	2.35244e-05	0	3.10116e-05	6.73779e-05	2.72138e-05	0.000119045	0.000393355	0	0	0	0	0	0	0	0	k__Bacteria	p__Acidobacteria	c__Acidobacteriia	o__Acidobacteriales	f__Koribacteraceae	g__	s__	211129		k__Bacteria;p__Acidobacteria;c__Acidobacteriia;o__Acidobacteriales;f__Koribacteraceae;g__;s__
OTU377	1.97863e-05	2.35244e-05	8.6734e-05	0.00058922	0.00101067	0.000462635	0.000666651	0.000439632	0	8.07081e-05	4.36767e-05	0	2.41645e-05	0	2.4785e-05	0	k__Bacteria	p__Acidobacteria	c__Acidobacteriia	o__Acidobacteriales	f__Koribacteraceae	g__	s__	209935		k__Bacteria;p__Acidobacteria;c__Acidobacteriia;o__Acidobacteriales;f__Koribacteraceae;g__;s__
OTU5285	0	0.000282293	0.000108418	0.000341128	0.00197642	0.00119741	0.00402371	0.000509047	0	0	0	0	0	0	0	0	k__Bacteria	p__Acidobacteria	c__Acidobacteriia	o__Acidobacteriales	f__Koribacteraceae	g__	s__	155297		k__Bacteria;p__Acidobacteria;c__Acidobacteriia;o__Acidobacteriales;f__Koribacteraceae;g__;s__
OTU10517	1.97863e-05	0.000376391	0.0021033	0.000341128	0.000381808	0.00035378	0.00123807	0.00256837	0	0	0	0	0	0	0	0	k__Bacteria	p__Acidobacteria	c__Acidobacteriia	o__Acidobacteriales	f__Koribacteraceae	g__	s__	154519		k__Bacteria;p__Acidobacteria;c__Acidobacteriia;o__Acidobacteriales;f__Koribacteraceae;g__;s__
OTU7343	1.97863e-05	0.000141147	6.50505e-05	3.10116e-05	6.73779e-05	8.16415e-05	2.3809e-05	0	0	0	0	0	0	0	0	0	k__Bacteria	p__Acidobacteria	c__Acidobacteriia	o__Acidobacteriales	f__Koribacteraceae	g__	s__	109694		k__Bacteria;p__Acidobacteria;c__Acidobacteriia;o__Acidobacteriales;f__Koribacteraceae;g__;s__
OTU3590	0.00015829	9.40977e-05	4.3367e-05	0.000248093	0.00031443	2.72138e-05	7.14269e-05	0	0	0	0	0	0	0	0	0	k__Bacteria	p__Acidobacteria	c__Acidobacteriia	o__Acidobacteriales	f__Koribacteraceae	g__CandidatusKoribacter	s__	4354098		k__Bacteria;p__Acidobacteria;c__Acidobacteriia;o__Acidobacteriales;f__Koribacteraceae;g__CandidatusKoribacter;s__
OTU957	0.000138504	0.000141147	6.50505e-05	0.000558209	6.73779e-05	0.00397322	0.0013333	0.000879263	0	2.69027e-05	0.000305737	0.00022921	2.41645e-05	7.75635e-05	2.4785e-05	3.66993e-05	k__Bacteria	p__Acidobacteria	c__Acidobacteriia	o__Acidobacteriales	f__Koribacteraceae	g__CandidatusKoribacter	s__	4343459		k__Bacteria;p__Acidobacteria;c__Acidobacteriia;o__Acidobacteriales;f__Koribacteraceae;g__CandidatusKoribacter;s__
OTU84	0.000138504	0.000329342	0.000173468	3.10116e-05	0.000830994	0.000489849	0.000547606	0.000300801	0	0	0	0	0	0	0	0	k__Bacteria	p__Acidobacteria	c__Acidobacteriia	o__Acidobacteriales	f__Koribacteraceae	g__CandidatusKoribacter	s__	877952		k__Bacteria;p__Acidobacteria;c__Acidobacteriia;o__Acidobacteriales;f__Koribacteraceae;g__CandidatusKoribacter;s__
OTU8393	0.000692521	0.00143499	0.00112754	0.00182968	0.00195396	0.00182333	9.52358e-05	0.00108751	0	0	0	0	4.8329e-05	0	0	0	k__Bacteria	p__Acidobacteria	c__Acidobacteriia	o__Acidobacteriales	f__Koribacteraceae	g__CandidatusKoribacter	s__	812560		k__Bacteria;p__Acidobacteria;c__Acidobacteriia;o__Acidobacteriales;f__Koribacteraceae;g__CandidatusKoribacter;s__
OTU1998	0	7.05733e-05	0.000108418	0.00142653	4.49186e-05	5.44277e-05	9.52358e-05	0.00141145	0	0	0	0	4.8329e-05	0	2.4785e-05	3.66993e-05	k__Bacteria	p__Acidobacteria	c__Acidobacteriia	o__Acidobacteriales	f__Koribacteraceae	g__CandidatusKoribacter	s__	806280		k__Bacteria;p__Acidobacteria;c__Acidobacteriia;o__Acidobacteriales;f__Koribacteraceae;g__CandidatusKoribacter;s__
OTU9496	0	9.40977e-05	2.16835e-05	6.20232e-05	0.000247052	0.000380994	9.52358e-05	0.00124948	0	0	0	0	0	0	0	0	k__Bacteria	p__Acidobacteria	c__Acidobacteriia	o__Acidobacteriales	f__Koribacteraceae	g__CandidatusKoribacter	s__	204592		k__Bacteria;p__Acidobacteria;c__Acidobacteriia;o__Acidobacteriales;f__Koribacteraceae;g__CandidatusKoribacter;s__
OTU4737	0	9.40977e-05	0.000346936	6.20232e-05	0.00105559	0.000217711	0.000380943	0.000740432	0	0	0	0	0	0	0	0	k__Bacteria	p__Acidobacteria	c__Acidobacteriia	o__Acidobacteriales	f__Koribacteraceae	g__CandidatusKoribacter	s__	154224		k__Bacteria;p__Acidobacteria;c__Acidobacteriia;o__Acidobacteriales;f__Koribacteraceae;g__CandidatusKoribacter;s__
OTU12110	7.91452e-05	4.70489e-05	6.50505e-05	0	0	5.44277e-05	0	2.31385e-05	0	0	0	0	0	0	0	0	k__Bacteria	p__Acidobacteria	c__DA052	o__Ellin6513	f__	g__	s__	New.ReferenceOTU400		k__Bacteria;p__Acidobacteria;c__DA052;o__Ellin6513;f__;g__;s__
OTU11619	0	2.35244e-05	0.000130101	0.000341128	0.000269512	0.000163283	7.14269e-05	0.000185108	0	0	0	0	0	0	0	0	k__Bacteria	p__Acidobacteria	c__DA052	o__Ellin6513	f__	g__	s__	New.ReferenceOTU251		k__Bacteria;p__Acidobacteria;c__DA052;o__Ellin6513;f__;g__;s__
OTU11929	9.89315e-05	0.000352866	0.000672189	0.000434162	0.00327906	0.00225875	0.00149996	0.0021056	0	0	0	0	0	0	0	0	k__Bacteria	p__Acidobacteria	c__DA052	o__Ellin6513	f__	g__	s__	New.ReferenceOTU1175		k__Bacteria;p__Acidobacteria;c__DA052;o__Ellin6513;f__;g__;s__
OTU10089	0.000474871	0.00148204	0.00312243	0.000837313	0.000830994	0.00152398	0.00264279	0.00363275	0	0	0	0	0	0	0	0	k__Bacteria	p__Acidobacteria	c__DA052	o__Ellin6513	f__	g__	s__	4166998		k__Bacteria;p__Acidobacteria;c__DA052;o__Ellin6513;f__;g__;s__
OTU10034	3.95726e-05	0.000305818	0.000411987	0.000372139	0.000763616	0.000380994	0.000309516	2.31385e-05	0	2.69027e-05	0	0	0	0	0	0	k__Bacteria	p__Acidobacteria	c__DA052	o__Ellin6513	f__	g__	s__	1146318		k__Bacteria;p__Acidobacteria;c__DA052;o__Ellin6513;f__;g__;s__
OTU10894	0	0.000541062	0.000173468	0.000434162	0.000179674	0.00171447	0.000357134	2.31385e-05	0	0	0	0	0	0	0	0	k__Bacteria	p__Acidobacteria	c__DA052	o__Ellin6513	f__	g__	s__	1109766		k__Bacteria;p__Acidobacteria;c__DA052;o__Ellin6513;f__;g__;s__
OTU780	0	0	4.3367e-05	6.20232e-05	0.000112296	0	4.76179e-05	4.6277e-05	0	0	0	0	0	0	0	0	k__Bacteria	p__Acidobacteria	c__DA052	o__Ellin6513	f__	g__	s__	1107029		k__Bacteria;p__Acidobacteria;c__DA052;o__Ellin6513;f__;g__;s__
OTU4264	0	0.000282293	4.3367e-05	0.000155058	0.000920831	0.00187776	7.14269e-05	0.000671017	0	0	0	0	0	0	0	0	k__Bacteria	p__Acidobacteria	c__DA052	o__Ellin6513	f__	g__	s__	1104688		k__Bacteria;p__Acidobacteria;c__DA052;o__Ellin6513;f__;g__;s__
OTU5795	0.000455085	0.00157614	0.00160458	0.00198474	0.00188658	0.000489849	0.000642842	0.001504	0	0	0	0	0	0	0	0	k__Bacteria	p__Acidobacteria	c__DA052	o__Ellin6513	f__	g__	s__	1024089		k__Bacteria;p__Acidobacteria;c__DA052;o__Ellin6513;f__;g__;s__
OTU7324	0.000217649	0.000494013	0.000281886	0.000403151	0	2.72138e-05	2.3809e-05	0.000323939	0	0	0	0	0	0	0	0	k__Bacteria	p__Acidobacteria	c__DA052	o__Ellin6513	f__	g__	s__	815546		k__Bacteria;p__Acidobacteria;c__DA052;o__Ellin6513;f__;g__;s__
OTU2601	0.00015829	0.000117622	0.000108418	6.20232e-05	0.000179674	8.16415e-05	9.52358e-05	0.00016197	0	2.69027e-05	0	0	0	0	0	0	k__Bacteria	p__Acidobacteria	c__DA052	o__Ellin6513	f__	g__	s__	772383		k__Bacteria;p__Acidobacteria;c__DA052;o__Ellin6513;f__;g__;s__
OTU8775	0.000138504	0.000258769	0	0.000155058	0.000179674	0	2.3809e-05	0	0	0	0	0	0	0	0	0	k__Bacteria	p__Acidobacteria	c__DA052	o__Ellin6513	f__	g__	s__	520587		k__Bacteria;p__Acidobacteria;c__DA052;o__Ellin6513;f__;g__;s__
OTU61202	1.97863e-05	2.35244e-05	4.3367e-05	6.20232e-05	2.24593e-05	5.44277e-05	4.76179e-05	4.6277e-05	0	0	0	0	0	0	0	0	k__Bacteria	p__Acidobacteria	c__EC1113	o__	f__	g__	s__	New.CleanUp.ReferenceOTU306321		k__Bacteria;p__Acidobacteria;c__EC1113;o__;f__;g__;s__
OTU6898	0	0	0.000130101	9.30348e-05	8.98372e-05	2.72138e-05	2.3809e-05	0.000138831	0	0	0	0	0	0	0	0	k__Bacteria	p__Acidobacteria	c__EC1113	o__	f__	g__	s__	4425106		k__Bacteria;p__Acidobacteria;c__EC1113;o__;f__;g__;s__
OTU26254	3.95726e-05	0.000117622	0	6.20232e-05	0.000157215	0.000870843	4.76179e-05	6.94155e-05	0	0	0	0	0	0	0	0	k__Bacteria	p__Acidobacteria	c__Holophagae	o__Holophagales	f__Holophagaceae	g__	s__	New.CleanUp.ReferenceOTU85924		k__Bacteria;p__Acidobacteria;c__Holophagae;o__Holophagales;f__Holophagaceae;g__;s__
OTU9593	0.00124654	0.000282293	2.16835e-05	0.00307015	8.98372e-05	0.000299352	0.000571415	0.00182794	0	2.69027e-05	0	0	0	0	0	0	k__Bacteria	p__Acidobacteria	c__iii1-8	o__32-20	f__	g__	s__	4389227		k__Bacteria;p__Acidobacteria;c__iii1-8;o__32-20;f__;g__;s__
OTU10157	0	2.35244e-05	0.000542088	3.10116e-05	0	0.000925271	0.000166663	0.000138831	0	0	0	0	0	0	0	0	k__Bacteria	p__Acidobacteria	c__iii1-8	o__32-20	f__	g__	s__	927789		k__Bacteria;p__Acidobacteria;c__iii1-8;o__32-20;f__;g__;s__
OTU3113	0.00146419	0.000846879	0.000715556	0.000651244	0	5.44277e-05	0.000285707	0.000809848	0	0	0	0	0	0	0	0	k__Bacteria	p__Acidobacteria	c__iii1-8	o__32-20	f__	g__	s__	221791		k__Bacteria;p__Acidobacteria;c__iii1-8;o__32-20;f__;g__;s__
OTU645	0	0	8.6734e-05	0.00018607	0.000157215	0.000108855	0.000119045	0.000254524	0	0	0	0	0	0	0	0	k__Bacteria	p__Acidobacteria	c__iii1-8	o__32-20	f__	g__	s__	218957		k__Bacteria;p__Acidobacteria;c__iii1-8;o__32-20;f__;g__;s__
OTU9699	0	2.35244e-05	4.3367e-05	0.000372139	0	0	7.14269e-05	0.000393355	0	0	0	0	0	0	0	0	k__Bacteria	p__Acidobacteria	c__iii1-8	o__32-20	f__	g__	s__	204402		k__Bacteria;p__Acidobacteria;c__iii1-8;o__32-20;f__;g__;s__
OTU9459	0	0	2.16835e-05	6.20232e-05	0.000426727	5.44277e-05	0.000166663	6.94155e-05	0	0	0	0	0	0	0	0	k__Bacteria	p__Acidobacteria	c__iii1-8	o__DS-18	f__	g__	s__	224372		k__Bacteria;p__Acidobacteria;c__iii1-8;o__DS-18;f__;g__;s__
OTU9025	3.95726e-05	4.70489e-05	6.50505e-05	0	0.00031443	0.000489849	0.000166663	0.00016197	0	0	0	0	0	0	0	0	k__Bacteria	p__Acidobacteria	c__iii1-8	o__DS-18	f__	g__	s__	160986		k__Bacteria;p__Acidobacteria;c__iii1-8;o__DS-18;f__;g__;s__
OTU6991	0.000771666	0.000870404	0.000195152	6.20232e-05	2.24593e-05	0.000326566	7.14269e-05	2.31385e-05	0	0	0	0	0	0	0	0	k__Bacteria	p__Acidobacteria	c__iii1-8	o__SJA-36	f__	g__	s__	326537		k__Bacteria;p__Acidobacteria;c__iii1-8;o__SJA-36;f__;g__;s__
OTU2667	0.000178077	9.40977e-05	0.00036862	0.00018607	2.24593e-05	0	0	4.6277e-05	0	0	0	0	0	0	0	0	k__Bacteria	p__Acidobacteria	c__PAUC37f	o__	f__	g__	s__	4348936		k__Bacteria;p__Acidobacteria;c__PAUC37f;o__;f__;g__;s__
OTU10968	1.97863e-05	0.000188195	0.000151785	0.000124046	4.49186e-05	0	0	2.31385e-05	0	0	0	0	0	0	0	0	k__Bacteria	p__Acidobacteria	c__PAUC37f	o__	f__	g__	s__	4348104		k__Bacteria;p__Acidobacteria;c__PAUC37f;o__;f__;g__;s__
OTU2747	0.00106846	4.70489e-05	0.000889024	0.000372139	0	0	7.14269e-05	0.00016197	0	0	0	0	0	0	0	0	k__Bacteria	p__Acidobacteria	c__RB25	o__	f__	g__	s__	673712		k__Bacteria;p__Acidobacteria;c__RB25;o__;f__;g__;s__
OTU35171	0	2.35244e-05	2.16835e-05	0	0.000202134	0.000190497	0.000119045	4.6277e-05	2.63657e-05	0	0	0	0	2.58545e-05	0	3.66993e-05	k__Bacteria	p__Acidobacteria	c__Solibacteres	o__Solibacterales	f__	g__	s__	New.CleanUp.ReferenceOTU144249		k__Bacteria;p__Acidobacteria;c__Solibacteres;o__Solibacterales;f__;g__;s__
OTU2646	1.97863e-05	0.000329342	0.000281886	0.000744278	0.000651319	0.00206825	0.000857122	0.00111065	0	0.000242124	0.000109192	0.000104186	2.41645e-05	0.000206836	0.000123925	0.000146797	k__Bacteria	p__Acidobacteria	c__Solibacteres	o__Solibacterales	f__	g__	s__	4438361		k__Bacteria;p__Acidobacteria;c__Solibacteres;o__Solibacterales;f__;g__;s__
OTU6307	3.95726e-05	4.70489e-05	2.16835e-05	9.30348e-05	4.49186e-05	2.72138e-05	0.000166663	0.000115693	0	0	0	0	0	0	0	0	k__Bacteria	p__Acidobacteria	c__Solibacteres	o__Solibacterales	f__	g__	s__	4377645		k__Bacteria;p__Acidobacteria;c__Solibacteres;o__Solibacterales;f__;g__;s__
OTU6973	3.95726e-05	7.05733e-05	0.000390303	0.000682255	0.000134756	0	0.000119045	0.00129576	0	0	0	0	0	0	0	0	k__Bacteria	p__Acidobacteria	c__Solibacteres	o__Solibacterales	f__	g__	s__	862901		k__Bacteria;p__Acidobacteria;c__Solibacteres;o__Solibacterales;f__;g__;s__
OTU6752	0.00053423	0.000305818	0.000108418	6.20232e-05	0	0	9.52358e-05	2.31385e-05	0	0	0	0	0	0	2.4785e-05	0	k__Bacteria	p__Acidobacteria	c__Solibacteres	o__Solibacterales	f__	g__	s__	807804		k__Bacteria;p__Acidobacteria;c__Solibacteres;o__Solibacterales;f__;g__;s__
OTU1918	0	0	0.000411987	0.000372139	4.49186e-05	5.44277e-05	0.000142854	0.000208247	0	0	0	0	0	0	0	0	k__Bacteria	p__Acidobacteria	c__Solibacteres	o__Solibacterales	f__	g__	s__	729865		k__Bacteria;p__Acidobacteria;c__Solibacteres;o__Solibacterales;f__;g__;s__
OTU11415	0	7.05733e-05	0	0	0.000134756	0.000217711	9.52358e-05	4.6277e-05	0	0	0	0	0	0	0	0	k__Bacteria	p__Acidobacteria	c__Solibacteres	o__Solibacterales	f__	g__	s__	627700		k__Bacteria;p__Acidobacteria;c__Solibacteres;o__Solibacterales;f__;g__;s__
OTU3664	0	0.000117622	0.000151785	6.20232e-05	0.000112296	5.44277e-05	2.3809e-05	0	0	0	2.18384e-05	2.08372e-05	0	0	0	0	k__Bacteria	p__Acidobacteria	c__Solibacteres	o__Solibacterales	f__	g__	s__	594397		k__Bacteria;p__Acidobacteria;c__Solibacteres;o__Solibacterales;f__;g__;s__
OTU4963	1.97863e-05	4.70489e-05	8.6734e-05	6.20232e-05	6.73779e-05	0.000108855	0	0.000115693	0	0	0	0	0	0	0	0	k__Bacteria	p__Acidobacteria	c__Solibacteres	o__Solibacterales	f__	g__	s__	562807		k__Bacteria;p__Acidobacteria;c__Solibacteres;o__Solibacterales;f__;g__;s__
OTU4073	0.000118718	0.000658684	6.50505e-05	3.10116e-05	0.00116788	0.004327	0.00226185	0.000509047	0	0	4.36767e-05	6.25117e-05	0	0.000103418	0.000123925	0.000128447	k__Bacteria	p__Acidobacteria	c__Solibacteres	o__Solibacterales	f__	g__	s__	511074		k__Bacteria;p__Acidobacteria;c__Solibacteres;o__Solibacterales;f__;g__;s__
OTU544	0	2.35244e-05	2.16835e-05	6.20232e-05	0.000134756	0.000136069	0.000166663	0	0	0	0	0	2.41645e-05	2.58545e-05	0	0	k__Bacteria	p__Acidobacteria	c__Solibacteres	o__Solibacterales	f__	g__	s__	237058		k__Bacteria;p__Acidobacteria;c__Solibacteres;o__Solibacterales;f__;g__;s__
OTU5271	0.000455085	0.000399915	4.3367e-05	3.10116e-05	6.73779e-05	0	4.76179e-05	0.00016197	0	0	0	0	0	0	0	0	k__Bacteria	p__Acidobacteria	c__Solibacteres	o__Solibacterales	f__	g__	s__	205900		k__Bacteria;p__Acidobacteria;c__Solibacteres;o__Solibacterales;f__;g__;s__
OTU1715	0.000554017	0.000352866	0.000130101	0	4.49186e-05	0	4.76179e-05	4.6277e-05	0	0	0	0	0	0	0	0	k__Bacteria	p__Acidobacteria	c__Solibacteres	o__Solibacterales	f__	g__	s__	154141		k__Bacteria;p__Acidobacteria;c__Solibacteres;o__Solibacterales;f__;g__;s__
OTU7626	0.000217649	0.00042344	0.000238519	0.00018607	0.000651319	0.000653132	0.00045237	0.000254524	2.63657e-05	2.69027e-05	6.55151e-05	2.08372e-05	0	2.58545e-05	0	1.83496e-05	k__Bacteria	p__Acidobacteria	c__Solibacteres	o__Solibacterales	f__	g__	s__	105453		k__Bacteria;p__Acidobacteria;c__Solibacteres;o__Solibacterales;f__;g__;s__
OTU6165	0.000217649	0.00021172	2.16835e-05	6.20232e-05	0	5.44277e-05	0	4.6277e-05	0	0	0	0	0	0	0	0	k__Bacteria	p__Acidobacteria	c__Solibacteres	o__Solibacterales	f__AKIW659	g__	s__	110208		k__Bacteria;p__Acidobacteria;c__Solibacteres;o__Solibacterales;f__AKIW659;g__;s__
OTU11451	0.00015829	0.000658684	0.000672189	0.00136451	0.00417743	0.00443586	0.00602367	0.00217502	0.000896435	0.000457346	0.000720666	0.000916839	0.000386632	0.000801489	0.00133839	0.000789034	k__Bacteria	p__Acidobacteria	c__Solibacteres	o__Solibacterales	f__Solibacteraceae	g__	s__	666038		k__Bacteria;p__Acidobacteria;c__Solibacteres;o__Solibacterales;f__Solibacteraceae;g__;s__
OTU6009	1.97863e-05	0.000117622	0	3.10116e-05	0.000112296	0.000163283	2.3809e-05	9.2554e-05	0	0	0	0	0	0	0	0	k__Bacteria	p__Acidobacteria	c__Solibacteres	o__Solibacterales	f__Solibacteraceae	g__	s__	513591		k__Bacteria;p__Acidobacteria;c__Solibacteres;o__Solibacterales;f__Solibacteraceae;g__;s__
OTU9980	0	0.000117622	0.000151785	0.000124046	0	8.16415e-05	4.76179e-05	0.000115693	0	0	0	0	0	0	0	0	k__Bacteria	p__Acidobacteria	c__Solibacteres	o__Solibacterales	f__Solibacteraceae	g__CandidatusSolibacter	s__	4458581		k__Bacteria;p__Acidobacteria;c__Solibacteres;o__Solibacterales;f__Solibacteraceae;g__CandidatusSolibacter;s__
OTU1434	0.000316581	0.00021172	8.6734e-05	0.000155058	8.98372e-05	2.72138e-05	2.3809e-05	0.00016197	0	5.38054e-05	0	0	0	0	0	5.50489e-05	k__Bacteria	p__Acidobacteria	c__Solibacteres	o__Solibacterales	f__Solibacteraceae	g__CandidatusSolibacter	s__	4397941		k__Bacteria;p__Acidobacteria;c__Solibacteres;o__Solibacterales;f__Solibacteraceae;g__CandidatusSolibacter;s__
OTU263	5.93589e-05	2.35244e-05	4.3367e-05	3.10116e-05	6.73779e-05	2.72138e-05	4.76179e-05	0.00016197	0	0	4.36767e-05	2.08372e-05	4.8329e-05	0	4.957e-05	0	k__Bacteria	p__Acidobacteria	c__Solibacteres	o__Solibacterales	f__Solibacteraceae	g__CandidatusSolibacter	s__	4375014		k__Bacteria;p__Acidobacteria;c__Solibacteres;o__Solibacterales;f__Solibacteraceae;g__CandidatusSolibacter;s__
OTU1418	0	0	6.50505e-05	3.10116e-05	2.24593e-05	0	4.76179e-05	9.2554e-05	0	0	0	0	0	0	0	0	k__Bacteria	p__Acidobacteria	c__Solibacteres	o__Solibacterales	f__Solibacteraceae	g__CandidatusSolibacter	s__	4374731		k__Bacteria;p__Acidobacteria;c__Solibacteres;o__Solibacterales;f__Solibacteraceae;g__CandidatusSolibacter;s__
OTU693	0.000118718	0.000282293	0.00036862	0.00260497	0.00646828	0.00318402	0.000333325	0.00337822	0.000105463	8.07081e-05	0.000174707	0.000562605	0.000193316	0.000439526	7.4355e-05	0.000201846	k__Bacteria	p__Acidobacteria	c__Solibacteres	o__Solibacterales	f__Solibacteraceae	g__CandidatusSolibacter	s__	4359889		k__Bacteria;p__Acidobacteria;c__Solibacteres;o__Solibacterales;f__Solibacteraceae;g__CandidatusSolibacter;s__
OTU3951	0.000455085	0.000541062	0.000173468	6.20232e-05	4.49186e-05	0	2.3809e-05	2.31385e-05	0	0	0	0	0	0	0	0	k__Bacteria	p__Acidobacteria	c__Solibacteres	o__Solibacterales	f__Solibacteraceae	g__CandidatusSolibacter	s__	3469796		k__Bacteria;p__Acidobacteria;c__Solibacteres;o__Solibacterales;f__Solibacteraceae;g__CandidatusSolibacter;s__
OTU10653	0.000118718	0.000164671	0.00036862	0.000248093	0.000112296	0	0.000142854	4.6277e-05	0	0	0	0	0	0	0	0	k__Bacteria	p__Acidobacteria	c__Solibacteres	o__Solibacterales	f__Solibacteraceae	g__CandidatusSolibacter	s__	1145908		k__Bacteria;p__Acidobacteria;c__Solibacteres;o__Solibacterales;f__Solibacteraceae;g__CandidatusSolibacter;s__
OTU1228	0.000554017	0.000729257	0.000542088	0.00077529	0.000336889	0	7.14269e-05	0.00016197	0	0	0	0	0	0	0	0	k__Bacteria	p__Acidobacteria	c__Solibacteres	o__Solibacterales	f__Solibacteraceae	g__CandidatusSolibacter	s__	1136721		k__Bacteria;p__Acidobacteria;c__Solibacteres;o__Solibacterales;f__Solibacteraceae;g__CandidatusSolibacter;s__
OTU11255	7.91452e-05	0.00042344	0.000390303	0.000682255	0.00318922	0.00386437	0.0015952	0.000740432	0.000131829	0.000107611	6.55151e-05	0.000125023	4.8329e-05	7.75635e-05	2.4785e-05	0.000311944	k__Bacteria	p__Acidobacteria	c__Solibacteres	o__Solibacterales	f__Solibacteraceae	g__CandidatusSolibacter	s__	1113229		k__Bacteria;p__Acidobacteria;c__Solibacteres;o__Solibacterales;f__Solibacteraceae;g__CandidatusSolibacter;s__
OTU9867	0	0	8.6734e-05	6.20232e-05	0.000112296	0.000244925	0.000214281	2.31385e-05	0	0	0	0	0	0	0	0	k__Bacteria	p__Acidobacteria	c__Solibacteres	o__Solibacterales	f__Solibacteraceae	g__CandidatusSolibacter	s__	1092813		k__Bacteria;p__Acidobacteria;c__Solibacteres;o__Solibacterales;f__Solibacteraceae;g__CandidatusSolibacter;s__
OTU636	3.95726e-05	2.35244e-05	0.00036862	0.000155058	4.49186e-05	2.72138e-05	2.3809e-05	0.000254524	0	0	0	0	0	0	0	1.83496e-05	k__Bacteria	p__Acidobacteria	c__Solibacteres	o__Solibacterales	f__Solibacteraceae	g__CandidatusSolibacter	s__	843189		k__Bacteria;p__Acidobacteria;c__Solibacteres;o__Solibacterales;f__Solibacteraceae;g__CandidatusSolibacter;s__
OTU2389	0.00284923	0.00042344	0.00401145	0.00753582	0.00720943	0.00498013	0.00419038	0.00548383	0	5.38054e-05	0	0	0	0	0.000123925	5.50489e-05	k__Bacteria	p__Acidobacteria	c__Solibacteres	o__Solibacterales	f__Solibacteraceae	g__CandidatusSolibacter	s__	790392		k__Bacteria;p__Acidobacteria;c__Solibacteres;o__Solibacterales;f__Solibacteraceae;g__CandidatusSolibacter;s__
OTU3846	3.95726e-05	4.70489e-05	2.16835e-05	0.000155058	0.000202134	0	2.3809e-05	0.000254524	0	2.69027e-05	2.18384e-05	0	0	0	0	1.83496e-05	k__Bacteria	p__Acidobacteria	c__Solibacteres	o__Solibacterales	f__Solibacteraceae	g__CandidatusSolibacter	s__	697651		k__Bacteria;p__Acidobacteria;c__Solibacteres;o__Solibacterales;f__Solibacteraceae;g__CandidatusSolibacter;s__
OTU5504	7.91452e-05	2.35244e-05	0.000173468	3.10116e-05	2.24593e-05	5.44277e-05	0.000166663	0	0	0	0	0	0	0	0	0	k__Bacteria	p__Acidobacteria	c__Solibacteres	o__Solibacterales	f__Solibacteraceae	g__CandidatusSolibacter	s__	692246		k__Bacteria;p__Acidobacteria;c__Solibacteres;o__Solibacterales;f__Solibacteraceae;g__CandidatusSolibacter;s__
OTU5857	0.000178077	0.000305818	0.00125764	0.000155058	6.73779e-05	0.00111577	0.000642842	0.00131889	0	2.69027e-05	0	0	0	2.58545e-05	0	0	k__Bacteria	p__Acidobacteria	c__Solibacteres	o__Solibacterales	f__Solibacteraceae	g__CandidatusSolibacter	s__	610196		k__Bacteria;p__Acidobacteria;c__Solibacteres;o__Solibacterales;f__Solibacteraceae;g__CandidatusSolibacter;s__
OTU7144	0.000138504	0.00042344	0.000108418	0.000124046	0.000291971	0.000326566	0.000285707	0.000254524	0	0	0	2.08372e-05	0	0	2.4785e-05	0	k__Bacteria	p__Acidobacteria	c__Solibacteres	o__Solibacterales	f__Solibacteraceae	g__CandidatusSolibacter	s__	576059		k__Bacteria;p__Acidobacteria;c__Solibacteres;o__Solibacterales;f__Solibacteraceae;g__CandidatusSolibacter;s__
OTU1038	0.000138504	0.000399915	2.16835e-05	0.000837313	0.00152723	0.000979698	0.000547606	0.000509047	0	0	0	0	0	0	0	1.83496e-05	k__Bacteria	p__Acidobacteria	c__Solibacteres	o__Solibacterales	f__Solibacteraceae	g__CandidatusSolibacter	s__	225292		k__Bacteria;p__Acidobacteria;c__Solibacteres;o__Solibacterales;f__Solibacteraceae;g__CandidatusSolibacter;s__
OTU6526	0.000118718	0.000376391	0.000542088	0.000713267	4.49186e-05	0.000898057	0.000833313	0.00136517	0	0	0	0	0	0	0	0	k__Bacteria	p__Acidobacteria	c__Solibacteres	o__Solibacterales	f__Solibacteraceae	g__CandidatusSolibacter	s__	224203		k__Bacteria;p__Acidobacteria;c__Solibacteres;o__Solibacterales;f__Solibacteraceae;g__CandidatusSolibacter;s__
OTU622	0	0	8.6734e-05	6.20232e-05	0.000112296	0.000108855	4.76179e-05	0.000277662	0	0	0	0	0	0	0	0	k__Bacteria	p__Acidobacteria	c__Solibacteres	o__Solibacterales	f__Solibacteraceae	g__CandidatusSolibacter	s__	223220		k__Bacteria;p__Acidobacteria;c__Solibacteres;o__Solibacterales;f__Solibacteraceae;g__CandidatusSolibacter;s__
OTU7704	1.97863e-05	0.000541062	2.16835e-05	6.20232e-05	0.000583942	0.00206825	0.000547606	0.000277662	0	5.38054e-05	8.73534e-05	0	2.41645e-05	5.1709e-05	4.957e-05	9.17482e-05	k__Bacteria	p__Acidobacteria	c__Solibacteres	o__Solibacterales	f__Solibacteraceae	g__CandidatusSolibacter	s__	212644		k__Bacteria;p__Acidobacteria;c__Solibacteres;o__Solibacterales;f__Solibacteraceae;g__CandidatusSolibacter;s__
OTU7851	0.000118718	0.000282293	0.000607138	0.00096136	0.00094329	0.000870843	0.00069046	0.000485909	0	0.000134513	2.18384e-05	0	0	0	0	5.50489e-05	k__Bacteria	p__Acidobacteria	c__Solibacteres	o__Solibacterales	f__Solibacteraceae	g__CandidatusSolibacter	s__	211600		k__Bacteria;p__Acidobacteria;c__Solibacteres;o__Solibacterales;f__Solibacteraceae;g__CandidatusSolibacter;s__
OTU11617	0.00015829	0.000141147	0.000281886	0.000124046	0	5.44277e-05	2.3809e-05	0.000277662	0	0	0	0	0	0	0	0	k__Bacteria	p__Acidobacteria	c__Sva0725	o__Sva0725	f__	g__	s__	New.ReferenceOTU253		k__Bacteria;p__Acidobacteria;c__Sva0725;o__Sva0725;f__;g__;s__
OTU6649	1.97863e-05	0.000141147	0.000281886	6.20232e-05	0.000202134	0	7.14269e-05	6.94155e-05	0	0	0	0	0	0	0	0	k__Bacteria	p__Acidobacteria	c__Sva0725	o__Sva0725	f__	g__	s__	223804		k__Bacteria;p__Acidobacteria;c__Sva0725;o__Sva0725;f__;g__;s__
OTU11827	1.97863e-05	4.70489e-05	0.000108418	0.00018607	4.49186e-05	0	4.76179e-05	0.000115693	0	0	0	0	0	0	0	0	k__Bacteria	p__Acidobacteria	c__TM1	o__	f__	g__	s__	New.ReferenceOTU706		k__Bacteria;p__Acidobacteria;c__TM1;o__;f__;g__;s__
OTU3029	0	0	0.000130101	6.20232e-05	2.24593e-05	0.000108855	0.000119045	9.2554e-05	0	0	0	0	0	0	0	0	k__Bacteria	p__Acidobacteria	c__TM1	o__	f__	g__	s__	254852		k__Bacteria;p__Acidobacteria;c__TM1;o__;f__;g__;s__
OTU11773	0	4.70489e-05	2.16835e-05	9.30348e-05	6.73779e-05	0.00138791	0.000976167	0.000671017	0	0	0	0	0	0	0	0	k__Bacteria	p__Actinobacteria	c__Acidimicrobiia	o__Acidimicrobiales	f__	g__	s__	New.ReferenceOTU922		k__Bacteria;p__Actinobacteria;c__Acidimicrobiia;o__Acidimicrobiales;f__;g__;s__
OTU34345	0	4.70489e-05	8.6734e-05	3.10116e-05	4.49186e-05	0.000299352	0.000142854	0.000208247	5.27315e-05	0	0	0	0	2.58545e-05	0	0	k__Bacteria	p__Actinobacteria	c__Acidimicrobiia	o__Acidimicrobiales	f__	g__	s__	New.CleanUp.ReferenceOTU139071		k__Bacteria;p__Actinobacteria;c__Acidimicrobiia;o__Acidimicrobiales;f__;g__;s__
OTU3508	0.000277008	4.70489e-05	0.000195152	6.20232e-05	0	2.72138e-05	4.76179e-05	4.6277e-05	0	0	0	0	0	0	0	0	k__Bacteria	p__Actinobacteria	c__Acidimicrobiia	o__Acidimicrobiales	f__	g__	s__	4444046		k__Bacteria;p__Actinobacteria;c__Acidimicrobiia;o__Acidimicrobiales;f__;g__;s__
OTU4734	7.91452e-05	2.35244e-05	6.50505e-05	0	4.49186e-05	0	0	4.6277e-05	0	0	0	0	0	0	0	0	k__Bacteria	p__Actinobacteria	c__Acidimicrobiia	o__Acidimicrobiales	f__	g__	s__	4427377		k__Bacteria;p__Actinobacteria;c__Acidimicrobiia;o__Acidimicrobiales;f__;g__;s__
OTU4271	0.000138504	9.40977e-05	0.000108418	0	0	0	7.14269e-05	2.31385e-05	0	0	0	0	0	0	0	0	k__Bacteria	p__Actinobacteria	c__Acidimicrobiia	o__Acidimicrobiales	f__	g__	s__	4375291		k__Bacteria;p__Actinobacteria;c__Acidimicrobiia;o__Acidimicrobiales;f__;g__;s__
OTU5299	0	0	0	0	0.000112296	0.000326566	4.76179e-05	0.000300801	0	0	0	0	0	0	2.4785e-05	5.50489e-05	k__Bacteria	p__Actinobacteria	c__Acidimicrobiia	o__Acidimicrobiales	f__	g__	s__	4353898		k__Bacteria;p__Actinobacteria;c__Acidimicrobiia;o__Acidimicrobiales;f__;g__;s__
OTU7547	0.000316581	0.000141147	0.000130101	0.000155058	6.73779e-05	0	4.76179e-05	2.31385e-05	0	0	0	0	0	0	0	0	k__Bacteria	p__Actinobacteria	c__Acidimicrobiia	o__Acidimicrobiales	f__	g__	s__	2442916		k__Bacteria;p__Actinobacteria;c__Acidimicrobiia;o__Acidimicrobiales;f__;g__;s__
OTU2497	1.97863e-05	0.000188195	0	6.20232e-05	0.000404267	5.44277e-05	0.000142854	2.31385e-05	0	0	0	0	0	0	0	0	k__Bacteria	p__Actinobacteria	c__Acidimicrobiia	o__Acidimicrobiales	f__	g__	s__	1122710		k__Bacteria;p__Actinobacteria;c__Acidimicrobiia;o__Acidimicrobiales;f__;g__;s__
OTU10273	3.95726e-05	2.35244e-05	8.6734e-05	3.10116e-05	0	0	4.76179e-05	6.94155e-05	0	0	0	0	0	0	0	0	k__Bacteria	p__Actinobacteria	c__Acidimicrobiia	o__Acidimicrobiales	f__	g__	s__	1039546		k__Bacteria;p__Actinobacteria;c__Acidimicrobiia;o__Acidimicrobiales;f__;g__;s__
OTU6992	5.93589e-05	7.05733e-05	4.3367e-05	3.10116e-05	0.000157215	0	4.76179e-05	2.31385e-05	0	2.69027e-05	0	0	0	0	0	0	k__Bacteria	p__Actinobacteria	c__Acidimicrobiia	o__Acidimicrobiales	f__	g__	s__	987899		k__Bacteria;p__Actinobacteria;c__Acidimicrobiia;o__Acidimicrobiales;f__;g__;s__
OTU9942	9.89315e-05	2.35244e-05	4.3367e-05	3.10116e-05	4.49186e-05	0	0	9.2554e-05	0	0	0	0	0	0	0	0	k__Bacteria	p__Actinobacteria	c__Acidimicrobiia	o__Acidimicrobiales	f__	g__	s__	984386		k__Bacteria;p__Actinobacteria;c__Acidimicrobiia;o__Acidimicrobiales;f__;g__;s__
OTU8234	0.000118718	4.70489e-05	0.000346936	3.10116e-05	0	0	2.3809e-05	0.000138831	5.27315e-05	0	0	2.08372e-05	0	0	0	1.83496e-05	k__Bacteria	p__Actinobacteria	c__Acidimicrobiia	o__Acidimicrobiales	f__	g__	s__	984175		k__Bacteria;p__Actinobacteria;c__Acidimicrobiia;o__Acidimicrobiales;f__;g__;s__
OTU10556	0.000118718	0.000188195	2.16835e-05	0.00018607	0.000269512	0.000190497	0.000214281	0.000370216	2.63657e-05	0	2.18384e-05	0	2.41645e-05	0	0	1.83496e-05	k__Bacteria	p__Actinobacteria	c__Acidimicrobiia	o__Acidimicrobiales	f__	g__	s__	966113		k__Bacteria;p__Actinobacteria;c__Acidimicrobiia;o__Acidimicrobiales;f__;g__;s__
OTU2246	0	0	4.3367e-05	3.10116e-05	0.000179674	2.72138e-05	0.000357134	6.94155e-05	0	2.69027e-05	4.36767e-05	0	0	0	0	0	k__Bacteria	p__Actinobacteria	c__Acidimicrobiia	o__Acidimicrobiales	f__	g__	s__	955577		k__Bacteria;p__Actinobacteria;c__Acidimicrobiia;o__Acidimicrobiales;f__;g__;s__
OTU1121	0	0	4.3367e-05	3.10116e-05	6.73779e-05	5.44277e-05	7.14269e-05	0.000138831	0	0	0	0	0	0	0	0	k__Bacteria	p__Actinobacteria	c__Acidimicrobiia	o__Acidimicrobiales	f__	g__	s__	904631		k__Bacteria;p__Actinobacteria;c__Acidimicrobiia;o__Acidimicrobiales;f__;g__;s__
OTU1074	0.000237436	0.000494013	0.000411987	0.000155058	6.73779e-05	0.000462635	0.000619033	0.000370216	0.00018456	0.000161416	6.55151e-05	2.08372e-05	4.8329e-05	7.75635e-05	0	7.33985e-05	k__Bacteria	p__Actinobacteria	c__Acidimicrobiia	o__Acidimicrobiales	f__	g__	s__	615729		k__Bacteria;p__Actinobacteria;c__Acidimicrobiia;o__Acidimicrobiales;f__;g__;s__
OTU1723	0.000296795	0.000282293	0.000390303	0.000279104	0	0	0.000142854	0.000393355	0	0	0	0	0	0	0	0	k__Bacteria	p__Actinobacteria	c__Acidimicrobiia	o__Acidimicrobiales	f__	g__	s__	257322		k__Bacteria;p__Actinobacteria;c__Acidimicrobiia;o__Acidimicrobiales;f__;g__;s__
OTU5599	7.91452e-05	0.000117622	0.000173468	9.30348e-05	0	0	0	2.31385e-05	0	0	0	0	0	0	0	0	k__Bacteria	p__Actinobacteria	c__Acidimicrobiia	o__Acidimicrobiales	f__	g__	s__	250987		k__Bacteria;p__Actinobacteria;c__Acidimicrobiia;o__Acidimicrobiales;f__;g__;s__
OTU1606	7.91452e-05	0.000141147	0.000672189	0.000651244	0.000179674	0.000217711	0.000666651	0.00360961	0	0	0	0	0	0	0	0	k__Bacteria	p__Actinobacteria	c__Acidimicrobiia	o__Acidimicrobiales	f__	g__	s__	226395		k__Bacteria;p__Actinobacteria;c__Acidimicrobiia;o__Acidimicrobiales;f__;g__;s__
OTU109	0.00037594	0.000376391	0.000542088	3.10116e-05	0.000112296	0.000625918	7.14269e-05	0.000485909	5.27315e-05	0.000188319	2.18384e-05	0	4.8329e-05	0.000155127	0	0	k__Bacteria	p__Actinobacteria	c__Acidimicrobiia	o__Acidimicrobiales	f__	g__	s__	223441		k__Bacteria;p__Actinobacteria;c__Acidimicrobiia;o__Acidimicrobiales;f__;g__;s__
OTU6476	1.97863e-05	2.35244e-05	0.000325253	9.30348e-05	0	5.44277e-05	0.000166663	0.000439632	0	2.69027e-05	0	0	0	0	0	0	k__Bacteria	p__Actinobacteria	c__Acidimicrobiia	o__Acidimicrobiales	f__	g__	s__	222364		k__Bacteria;p__Actinobacteria;c__Acidimicrobiia;o__Acidimicrobiales;f__;g__;s__
OTU3583	0.000257222	0.000117622	2.16835e-05	0.000124046	0.000157215	5.44277e-05	2.3809e-05	0.000740432	0	0	0	0	0	0	0	0	k__Bacteria	p__Actinobacteria	c__Acidimicrobiia	o__Acidimicrobiales	f__	g__	s__	217034		k__Bacteria;p__Actinobacteria;c__Acidimicrobiia;o__Acidimicrobiales;f__;g__;s__
OTU4356	0.000118718	7.05733e-05	0.000346936	9.30348e-05	0	0	2.3809e-05	4.6277e-05	0	0	0	0	0	0	0	0	k__Bacteria	p__Actinobacteria	c__Acidimicrobiia	o__Acidimicrobiales	f__	g__	s__	216638		k__Bacteria;p__Actinobacteria;c__Acidimicrobiia;o__Acidimicrobiales;f__;g__;s__
OTU555	1.97863e-05	0.000188195	0.000303569	3.10116e-05	0.000112296	2.72138e-05	0.000809505	0.000601601	2.63657e-05	0.000161416	2.18384e-05	2.08372e-05	2.41645e-05	2.58545e-05	4.957e-05	5.50489e-05	k__Bacteria	p__Actinobacteria	c__Acidimicrobiia	o__Acidimicrobiales	f__	g__	s__	112066		k__Bacteria;p__Actinobacteria;c__Acidimicrobiia;o__Acidimicrobiales;f__;g__;s__
OTU8104	0.000514444	0.00063516	0.000498721	0.000155058	0.000202134	0.000326566	0.000309516	0.00143459	0	2.69027e-05	0	0	0	0	0	0	k__Bacteria	p__Actinobacteria	c__Acidimicrobiia	o__Acidimicrobiales	f__	g__	s__	107187		k__Bacteria;p__Actinobacteria;c__Acidimicrobiia;o__Acidimicrobiales;f__;g__;s__
OTU11570	0.000455085	0.000541062	0.000390303	0.000465174	6.73779e-05	8.16415e-05	0.000309516	0.000717294	0	2.69027e-05	0	0	0	0	0	1.83496e-05	k__Bacteria	p__Actinobacteria	c__Acidimicrobiia	o__Acidimicrobiales	f__C111	g__	s__	New.ReferenceOTU730		k__Bacteria;p__Actinobacteria;c__Acidimicrobiia;o__Acidimicrobiales;f__C111;g__;s__
OTU67249	9.89315e-05	7.05733e-05	6.50505e-05	6.20232e-05	2.24593e-05	0.000108855	2.3809e-05	2.31385e-05	0	0	0	0	0	0	0	0	k__Bacteria	p__Actinobacteria	c__Acidimicrobiia	o__Acidimicrobiales	f__C111	g__	s__	New.CleanUp.ReferenceOTU345697		k__Bacteria;p__Actinobacteria;c__Acidimicrobiia;o__Acidimicrobiales;f__C111;g__;s__
OTU58400	3.95726e-05	9.40977e-05	8.6734e-05	6.20232e-05	0	0	0	6.94155e-05	0	0	0	0	0	0	0	0	k__Bacteria	p__Actinobacteria	c__Acidimicrobiia	o__Acidimicrobiales	f__C111	g__	s__	New.CleanUp.ReferenceOTU288554		k__Bacteria;p__Actinobacteria;c__Acidimicrobiia;o__Acidimicrobiales;f__C111;g__;s__
OTU4077	0.00112782	0.00129384	0.000672189	9.30348e-05	0.000471645	0	0.000595224	0.000439632	0	0	0	0	0	0	0	0	k__Bacteria	p__Actinobacteria	c__Acidimicrobiia	o__Acidimicrobiales	f__C111	g__	s__	4369700		k__Bacteria;p__Actinobacteria;c__Acidimicrobiia;o__Acidimicrobiales;f__C111;g__;s__
OTU5526	0.000356154	0.000117622	0.000130101	0.000248093	0	2.72138e-05	9.52358e-05	9.2554e-05	2.63657e-05	0	0	0	0	0	0	0	k__Bacteria	p__Actinobacteria	c__Acidimicrobiia	o__Acidimicrobiales	f__C111	g__	s__	968464		k__Bacteria;p__Actinobacteria;c__Acidimicrobiia;o__Acidimicrobiales;f__C111;g__;s__
OTU5534	0.000455085	9.40977e-05	0.00114923	0.00136451	0.000718697	0.000190497	0.000809505	0.00201305	2.63657e-05	0	0	0	0	0	0	0	k__Bacteria	p__Actinobacteria	c__Acidimicrobiia	o__Acidimicrobiales	f__C111	g__	s__	904212		k__Bacteria;p__Actinobacteria;c__Acidimicrobiia;o__Acidimicrobiales;f__C111;g__;s__
OTU5777	7.91452e-05	7.05733e-05	6.50505e-05	0	0	0	9.52358e-05	2.31385e-05	0	0	0	0	0	0	0	0	k__Bacteria	p__Actinobacteria	c__Acidimicrobiia	o__Acidimicrobiales	f__C111	g__	s__	894047		k__Bacteria;p__Actinobacteria;c__Acidimicrobiia;o__Acidimicrobiales;f__C111;g__;s__
OTU8628	5.93589e-05	0.000917453	0.000628822	0.000124046	6.73779e-05	5.44277e-05	0.000309516	0.00062474	0	0	0	0	0	0	0	0	k__Bacteria	p__Actinobacteria	c__Acidimicrobiia	o__Acidimicrobiales	f__C111	g__	s__	859313		k__Bacteria;p__Actinobacteria;c__Acidimicrobiia;o__Acidimicrobiales;f__C111;g__;s__
OTU8243	0.000316581	0.00021172	0.000411987	0.000217081	4.49186e-05	0	0.000119045	0.000185108	0	2.69027e-05	0	0	0	0	0	0	k__Bacteria	p__Actinobacteria	c__Acidimicrobiia	o__Acidimicrobiales	f__C111	g__	s__	859157		k__Bacteria;p__Actinobacteria;c__Acidimicrobiia;o__Acidimicrobiales;f__C111;g__;s__
OTU276	1.97863e-05	0.000329342	0.000390303	0.000124046	0.000269512	5.44277e-05	9.52358e-05	9.2554e-05	0	0	0	0	0	0	2.4785e-05	3.66993e-05	k__Bacteria	p__Actinobacteria	c__Acidimicrobiia	o__Acidimicrobiales	f__C111	g__	s__	825112		k__Bacteria;p__Actinobacteria;c__Acidimicrobiia;o__Acidimicrobiales;f__C111;g__;s__
OTU7596	5.93589e-05	0.000352866	0.000498721	0.000155058	2.24593e-05	0	0.000166663	0.00016197	0	2.69027e-05	0	0	0	0	0	0	k__Bacteria	p__Actinobacteria	c__Acidimicrobiia	o__Acidimicrobiales	f__C111	g__	s__	718335		k__Bacteria;p__Actinobacteria;c__Acidimicrobiia;o__Acidimicrobiales;f__C111;g__;s__
OTU6439	0.000415512	0.000494013	2.16835e-05	0.000124046	0	0	0.000142854	0.000138831	0	2.69027e-05	0	0	0	0	0	1.83496e-05	k__Bacteria	p__Actinobacteria	c__Acidimicrobiia	o__Acidimicrobiales	f__C111	g__	s__	222755		k__Bacteria;p__Actinobacteria;c__Acidimicrobiia;o__Acidimicrobiales;f__C111;g__;s__
OTU7121	0.00126632	0.000964502	0.000628822	0.000372139	4.49186e-05	2.72138e-05	9.52358e-05	4.6277e-05	0	0	0	0	0	0	0	0	k__Bacteria	p__Actinobacteria	c__Acidimicrobiia	o__Acidimicrobiales	f__C111	g__	s__	125157		k__Bacteria;p__Actinobacteria;c__Acidimicrobiia;o__Acidimicrobiales;f__C111;g__;s__
OTU6642	0.00091017	0.00101155	0.000889024	0.000465174	0	0	0.000166663	0.000439632	0	0	0	0	0	0	0	0	k__Bacteria	p__Actinobacteria	c__Acidimicrobiia	o__Acidimicrobiales	f__C111	g__	s__	125045		k__Bacteria;p__Actinobacteria;c__Acidimicrobiia;o__Acidimicrobiales;f__C111;g__;s__
OTU12342	1.97863e-05	0.000117622	0.000173468	0.000217081	4.49186e-05	5.44277e-05	4.76179e-05	0.000277662	0	2.69027e-05	0	0	0	0	0	0	k__Bacteria	p__Actinobacteria	c__Acidimicrobiia	o__Acidimicrobiales	f__EB1017	g__	s__	New.ReferenceOTU318		k__Bacteria;p__Actinobacteria;c__Acidimicrobiia;o__Acidimicrobiales;f__EB1017;g__;s__
OTU56494	0.000257222	0.000282293	0.000303569	9.30348e-05	2.24593e-05	0	2.3809e-05	4.6277e-05	0	0	0	0	0	0	0	0	k__Bacteria	p__Actinobacteria	c__Acidimicrobiia	o__Acidimicrobiales	f__EB1017	g__	s__	New.CleanUp.ReferenceOTU277171		k__Bacteria;p__Actinobacteria;c__Acidimicrobiia;o__Acidimicrobiales;f__EB1017;g__;s__
OTU41977	0	0	4.3367e-05	9.30348e-05	4.49186e-05	2.72138e-05	0.000119045	0.000138831	0	0	0	0	0	0	0	0	k__Bacteria	p__Actinobacteria	c__Acidimicrobiia	o__Acidimicrobiales	f__EB1017	g__	s__	New.CleanUp.ReferenceOTU187641		k__Bacteria;p__Actinobacteria;c__Acidimicrobiia;o__Acidimicrobiales;f__EB1017;g__;s__
OTU35358	1.97863e-05	0.000282293	0.000390303	0.000372139	4.49186e-05	0.000435422	0.000428561	0.000393355	2.63657e-05	5.38054e-05	2.18384e-05	0	2.41645e-05	2.58545e-05	0	0	k__Bacteria	p__Actinobacteria	c__Acidimicrobiia	o__Acidimicrobiales	f__EB1017	g__	s__	New.CleanUp.ReferenceOTU145348		k__Bacteria;p__Actinobacteria;c__Acidimicrobiia;o__Acidimicrobiales;f__EB1017;g__;s__
OTU5024	3.95726e-05	0.00021172	6.50505e-05	0.000248093	4.49186e-05	0.000217711	0.000785696	0.000347078	0.000105463	0.000134513	0.000109192	2.08372e-05	0.000120823	7.75635e-05	0.00014871	1.83496e-05	k__Bacteria	p__Actinobacteria	c__Acidimicrobiia	o__Acidimicrobiales	f__EB1017	g__	s__	4465309		k__Bacteria;p__Actinobacteria;c__Acidimicrobiia;o__Acidimicrobiales;f__EB1017;g__;s__
OTU6316	0.000356154	9.40977e-05	0.000932391	0.00108541	0.00148231	0.00250367	0.00157139	0.0012032	0	0.000107611	0.00013103	4.16745e-05	0	0.000129272	2.4785e-05	0.000165147	k__Bacteria	p__Actinobacteria	c__Acidimicrobiia	o__Acidimicrobiales	f__EB1017	g__	s__	1123057		k__Bacteria;p__Actinobacteria;c__Acidimicrobiia;o__Acidimicrobiales;f__EB1017;g__;s__
OTU10872	5.93589e-05	0.000164671	0.000130101	6.20232e-05	0	0	4.76179e-05	2.31385e-05	0	0	0	0	0	0	0	0	k__Bacteria	p__Actinobacteria	c__Acidimicrobiia	o__Acidimicrobiales	f__EB1017	g__	s__	1118788		k__Bacteria;p__Actinobacteria;c__Acidimicrobiia;o__Acidimicrobiales;f__EB1017;g__;s__
OTU3278	0.000118718	2.35244e-05	6.50505e-05	0.000124046	6.73779e-05	2.72138e-05	4.76179e-05	0.000185108	0	0	0	0	0	0	0	0	k__Bacteria	p__Actinobacteria	c__Acidimicrobiia	o__Acidimicrobiales	f__EB1017	g__	s__	1027400		k__Bacteria;p__Actinobacteria;c__Acidimicrobiia;o__Acidimicrobiales;f__EB1017;g__;s__
OTU11444	0.000732093	0.000376391	0.000758923	0.000682255	0.000157215	2.72138e-05	0.000261899	0.00134203	0	0	0	0	0	0	0	0	k__Bacteria	p__Actinobacteria	c__Acidimicrobiia	o__Acidimicrobiales	f__EB1017	g__	s__	1012668		k__Bacteria;p__Actinobacteria;c__Acidimicrobiia;o__Acidimicrobiales;f__EB1017;g__;s__
OTU10106	0.000118718	0.000164671	0.000325253	9.30348e-05	2.24593e-05	0.000136069	0.000166663	0.000254524	0	0	0	0	0	0	0	0	k__Bacteria	p__Actinobacteria	c__Acidimicrobiia	o__Acidimicrobiales	f__EB1017	g__	s__	854368		k__Bacteria;p__Actinobacteria;c__Acidimicrobiia;o__Acidimicrobiales;f__EB1017;g__;s__
OTU2524	0.000455085	0.000305818	0.00125764	0.000713267	0.00062886	0.00070756	0.000833313	0.000532186	5.27315e-05	0.000161416	4.36767e-05	0	7.24935e-05	0.000129272	2.4785e-05	3.66993e-05	k__Bacteria	p__Actinobacteria	c__Acidimicrobiia	o__Acidimicrobiales	f__EB1017	g__	s__	630818		k__Bacteria;p__Actinobacteria;c__Acidimicrobiia;o__Acidimicrobiales;f__EB1017;g__;s__
OTU1206	0.000178077	0.00183491	0.000195152	0.00210879	0.00159461	0.00138791	0.000380943	0.00319311	7.90972e-05	0.000134513	0.000109192	0	0	0.000103418	0	1.83496e-05	k__Bacteria	p__Actinobacteria	c__Acidimicrobiia	o__Acidimicrobiales	f__EB1017	g__	s__	542933		k__Bacteria;p__Actinobacteria;c__Acidimicrobiia;o__Acidimicrobiales;f__EB1017;g__;s__
OTU11253	0.00053423	7.05733e-05	0.000910707	0.000651244	0.000763616	0.000435422	0.000833313	0.000763571	0.000131829	8.07081e-05	8.73534e-05	0	4.8329e-05	0	2.4785e-05	1.83496e-05	k__Bacteria	p__Actinobacteria	c__Acidimicrobiia	o__Acidimicrobiales	f__EB1017	g__	s__	529793		k__Bacteria;p__Actinobacteria;c__Acidimicrobiia;o__Acidimicrobiales;f__EB1017;g__;s__
OTU3319	0.000296795	0.000376391	2.16835e-05	0.000372139	0.000202134	0.000163283	0.000261899	0.000578463	0	0	0	0	0	0	0	0	k__Bacteria	p__Actinobacteria	c__Acidimicrobiia	o__Acidimicrobiales	f__EB1017	g__	s__	297615		k__Bacteria;p__Actinobacteria;c__Acidimicrobiia;o__Acidimicrobiales;f__EB1017;g__;s__
OTU1052	0.00015829	7.05733e-05	0.000585455	0.000217081	0.000853453	8.16415e-05	0.00102379	0.00335508	0	0	0	0	0	0	0	0	k__Bacteria	p__Actinobacteria	c__Acidimicrobiia	o__Acidimicrobiales	f__EB1017	g__	s__	257611		k__Bacteria;p__Actinobacteria;c__Acidimicrobiia;o__Acidimicrobiales;f__EB1017;g__;s__
OTU5796	0.00142461	0.00110565	0.00117091	0.00142653	0.000269512	0.000136069	2.3809e-05	0.00145773	0	0	0	0	0	0	0	0	k__Bacteria	p__Actinobacteria	c__Acidimicrobiia	o__Acidimicrobiales	f__EB1017	g__	s__	237703		k__Bacteria;p__Actinobacteria;c__Acidimicrobiia;o__Acidimicrobiales;f__EB1017;g__;s__
OTU356	0.000118718	7.05733e-05	0.000477037	0.000279104	8.98372e-05	0.000244925	2.3809e-05	0.00062474	0	2.69027e-05	0	0	0	0	0	3.66993e-05	k__Bacteria	p__Actinobacteria	c__Acidimicrobiia	o__Acidimicrobiales	f__EB1017	g__	s__	207912		k__Bacteria;p__Actinobacteria;c__Acidimicrobiia;o__Acidimicrobiales;f__EB1017;g__;s__
OTU1102	0.00075188	7.05733e-05	0.000281886	6.20232e-05	4.49186e-05	0	2.3809e-05	0.000115693	0	2.69027e-05	0	0	0	0	0	0	k__Bacteria	p__Actinobacteria	c__Acidimicrobiia	o__Acidimicrobiales	f__Iamiaceae	g__Iamia	s__	93175		k__Bacteria;p__Actinobacteria;c__Acidimicrobiia;o__Acidimicrobiales;f__Iamiaceae;g__Iamia;s__
OTU11922	0	9.40977e-05	0.000303569	6.20232e-05	0.000404267	0.000789202	0.00111902	9.2554e-05	0	0	0	0	0	0	0	0	k__Bacteria	p__Actinobacteria	c__Actinobacteria	o__Actinomycetales	f__	g__	s__	New.ReferenceOTU745		k__Bacteria;p__Actinobacteria;c__Actinobacteria;o__Actinomycetales;f__;g__;s__
OTU13028	1.97863e-05	4.70489e-05	0.000325253	0.000124046	4.49186e-05	8.16415e-05	0.000166663	0.000300801	0	0	0	4.16745e-05	0	0	2.4785e-05	0	k__Bacteria	p__Actinobacteria	c__Actinobacteria	o__Actinomycetales	f__	g__	s__	New.CleanUp.ReferenceOTU3754		k__Bacteria;p__Actinobacteria;c__Actinobacteria;o__Actinomycetales;f__;g__;s__
OTU67629	7.91452e-05	0.000141147	6.50505e-05	6.20232e-05	6.73779e-05	0	2.3809e-05	4.6277e-05	0	0	0	0	0	0	0	0	k__Bacteria	p__Actinobacteria	c__Actinobacteria	o__Actinomycetales	f__	g__	s__	New.CleanUp.ReferenceOTU348272		k__Bacteria;p__Actinobacteria;c__Actinobacteria;o__Actinomycetales;f__;g__;s__
OTU10616	3.95726e-05	4.70489e-05	6.50505e-05	0	4.49186e-05	2.72138e-05	2.3809e-05	2.31385e-05	0	0	0	0	0	0	0	0	k__Bacteria	p__Actinobacteria	c__Actinobacteria	o__Actinomycetales	f__	g__	s__	1072854		k__Bacteria;p__Actinobacteria;c__Actinobacteria;o__Actinomycetales;f__;g__;s__
OTU9056	0	0.00150556	0.000954074	0.00173665	0.00298709	0.00949763	0.00892836	0.00326253	0.000421852	0.000887789	0.000611474	0.00172949	0.000676606	0.000361963	0.00143753	0.000770685	k__Bacteria	p__Actinobacteria	c__Actinobacteria	o__Actinomycetales	f__	g__	s__	1043812		k__Bacteria;p__Actinobacteria;c__Actinobacteria;o__Actinomycetales;f__;g__;s__
OTU8216	3.95726e-05	7.05733e-05	0.000108418	0.000155058	8.98372e-05	5.44277e-05	0.000142854	0.000347078	7.90972e-05	0	2.18384e-05	0	0	5.1709e-05	2.4785e-05	3.66993e-05	k__Bacteria	p__Actinobacteria	c__Actinobacteria	o__Actinomycetales	f__	g__	s__	1018122		k__Bacteria;p__Actinobacteria;c__Actinobacteria;o__Actinomycetales;f__;g__;s__
OTU8241	0	0	4.3367e-05	0.000124046	4.49186e-05	0.000190497	0.000119045	4.6277e-05	0	0	0	0	0	0	0	0	k__Bacteria	p__Actinobacteria	c__Actinobacteria	o__Actinomycetales	f__	g__	s__	973295		k__Bacteria;p__Actinobacteria;c__Actinobacteria;o__Actinomycetales;f__;g__;s__
OTU10777	9.89315e-05	0	0.000455354	6.20232e-05	2.24593e-05	8.16415e-05	2.3809e-05	0.000370216	0	2.69027e-05	2.18384e-05	0	0	0	0	0	k__Bacteria	p__Actinobacteria	c__Actinobacteria	o__Actinomycetales	f__	g__	s__	972343		k__Bacteria;p__Actinobacteria;c__Actinobacteria;o__Actinomycetales;f__;g__;s__
OTU2580	0	2.35244e-05	0.000130101	6.20232e-05	0.000336889	0.000408208	0.00069046	0.000208247	0	0	4.36767e-05	2.08372e-05	0	0	0	0	k__Bacteria	p__Actinobacteria	c__Actinobacteria	o__Actinomycetales	f__	g__	s__	668615		k__Bacteria;p__Actinobacteria;c__Actinobacteria;o__Actinomycetales;f__;g__;s__
OTU8619	1.97863e-05	2.35244e-05	0	6.20232e-05	0.000269512	0.000190497	0.000190472	0.000323939	0	0	0	2.08372e-05	0	2.58545e-05	0	1.83496e-05	k__Bacteria	p__Actinobacteria	c__Actinobacteria	o__Actinomycetales	f__	g__	s__	410905		k__Bacteria;p__Actinobacteria;c__Actinobacteria;o__Actinomycetales;f__;g__;s__
OTU10802	0.0010091	0.0010586	0.000607138	0.00158159	0.000426727	8.16415e-05	0.000761887	0.00155028	0	0	0	0	0	0	0	0	k__Bacteria	p__Actinobacteria	c__Actinobacteria	o__Actinomycetales	f__	g__	s__	254635		k__Bacteria;p__Actinobacteria;c__Actinobacteria;o__Actinomycetales;f__;g__;s__
OTU5343	3.95726e-05	2.35244e-05	4.3367e-05	0	0.000247052	2.72138e-05	0.000261899	2.31385e-05	7.90972e-05	0	0	0	0	0	0	0	k__Bacteria	p__Actinobacteria	c__Actinobacteria	o__Actinomycetales	f__	g__	s__	250241		k__Bacteria;p__Actinobacteria;c__Actinobacteria;o__Actinomycetales;f__;g__;s__
OTU922	0.000217649	9.40977e-05	0.000173468	9.30348e-05	0	0	9.52358e-05	9.2554e-05	0	2.69027e-05	0	0	2.41645e-05	0	0	0	k__Bacteria	p__Actinobacteria	c__Actinobacteria	o__Actinomycetales	f__	g__	s__	153594		k__Bacteria;p__Actinobacteria;c__Actinobacteria;o__Actinomycetales;f__;g__;s__
OTU32229	0	4.70489e-05	0	0	0.000112296	0.00035378	7.14269e-05	4.6277e-05	0	0	0	0	0	0	0	0	k__Bacteria	p__Actinobacteria	c__Actinobacteria	o__Actinomycetales	f__Actinosynnemataceae	g__	s__	New.CleanUp.ReferenceOTU124894		k__Bacteria;p__Actinobacteria;c__Actinobacteria;o__Actinomycetales;f__Actinosynnemataceae;g__;s__
OTU5207	0.000257222	0.000117622	0.000477037	0.000124046	2.24593e-05	8.16415e-05	7.14269e-05	0.000115693	0	0	4.36767e-05	0	7.24935e-05	2.58545e-05	2.4785e-05	1.83496e-05	k__Bacteria	p__Actinobacteria	c__Actinobacteria	o__Actinomycetales	f__Cellulomonadaceae	g__Cellulomonas	s__	4340498		k__Bacteria;p__Actinobacteria;c__Actinobacteria;o__Actinomycetales;f__Cellulomonadaceae;g__Cellulomonas;s__
OTU7711	9.89315e-05	0	4.3367e-05	3.10116e-05	0.000179674	0	7.14269e-05	0.000138831	0	0	0	0	0	0	0	0	k__Bacteria	p__Actinobacteria	c__Actinobacteria	o__Actinomycetales	f__Frankiaceae	g__	s__	4325081		k__Bacteria;p__Actinobacteria;c__Actinobacteria;o__Actinomycetales;f__Frankiaceae;g__;s__
OTU6107	3.95726e-05	0	0.000346936	0.000155058	8.98372e-05	0	0.000142854	0.000185108	0	0	0	0	0	0	0	0	k__Bacteria	p__Actinobacteria	c__Actinobacteria	o__Actinomycetales	f__Frankiaceae	g__	s__	1089190		k__Bacteria;p__Actinobacteria;c__Actinobacteria;o__Actinomycetales;f__Frankiaceae;g__;s__
OTU3095	0.000296795	0.00063516	0.000173468	0.000465174	0.000808535	0.000979698	0.000976167	0.00124948	0.000580046	0.000161416	2.18384e-05	0.000291721	7.24935e-05	0.000155127	4.957e-05	9.17482e-05	k__Bacteria	p__Actinobacteria	c__Actinobacteria	o__Actinomycetales	f__Frankiaceae	g__	s__	241899		k__Bacteria;p__Actinobacteria;c__Actinobacteria;o__Actinomycetales;f__Frankiaceae;g__;s__
OTU3153	1.97863e-05	0.000329342	0.000997441	0.00117844	0.000830994	0.00035378	0.00140473	0.00145773	0.000474583	0.00040354	0.000196545	0.000270884	0.000193316	0.000336108	2.4785e-05	0.000275245	k__Bacteria	p__Actinobacteria	c__Actinobacteria	o__Actinomycetales	f__Frankiaceae	g__	s__	11622		k__Bacteria;p__Actinobacteria;c__Actinobacteria;o__Actinomycetales;f__Frankiaceae;g__;s__
OTU6048	0.000672734	0.000352866	0.0021033	0.00151957	0.000247052	0.000517063	0.000166663	0.000347078	0	0	0	0	0	0	0	0	k__Bacteria	p__Actinobacteria	c__Actinobacteria	o__Actinomycetales	f__Intrasporangiaceae	g__	s__	1145384		k__Bacteria;p__Actinobacteria;c__Actinobacteria;o__Actinomycetales;f__Intrasporangiaceae;g__;s__
OTU4100	0.00037594	0.000117622	4.3367e-05	9.30348e-05	0.000179674	0.000108855	4.76179e-05	0.000254524	2.63657e-05	0	0	0	0	0	0	3.66993e-05	k__Bacteria	p__Actinobacteria	c__Actinobacteria	o__Actinomycetales	f__Intrasporangiaceae	g__	s__	689528		k__Bacteria;p__Actinobacteria;c__Actinobacteria;o__Actinomycetales;f__Intrasporangiaceae;g__;s__
OTU4712	0.000336367	0.000141147	0.000325253	3.10116e-05	4.49186e-05	2.72138e-05	0.000142854	2.31385e-05	0	2.69027e-05	0	0	0	0	0	1.83496e-05	k__Bacteria	p__Actinobacteria	c__Actinobacteria	o__Actinomycetales	f__Intrasporangiaceae	g__Phycicoccus	s__	838721		k__Bacteria;p__Actinobacteria;c__Actinobacteria;o__Actinomycetales;f__Intrasporangiaceae;g__Phycicoccus;s__
OTU4916	0.000118718	9.40977e-05	0.000108418	0	2.24593e-05	0.000136069	0.000428561	0.000208247	0	0	0	0	0	0	0	0	k__Bacteria	p__Actinobacteria	c__Actinobacteria	o__Actinomycetales	f__Intrasporangiaceae	g__Terracoccus	s__	4465540		k__Bacteria;p__Actinobacteria;c__Actinobacteria;o__Actinomycetales;f__Intrasporangiaceae;g__Terracoccus;s__
OTU2979	3.95726e-05	4.70489e-05	8.6734e-05	6.20232e-05	2.24593e-05	0	7.14269e-05	2.31385e-05	0	5.38054e-05	0	0	0	2.58545e-05	0	3.66993e-05	k__Bacteria	p__Actinobacteria	c__Actinobacteria	o__Actinomycetales	f__Kineosporiaceae	g__	s__	726955		k__Bacteria;p__Actinobacteria;c__Actinobacteria;o__Actinomycetales;f__Kineosporiaceae;g__;s__
OTU6279	0.000336367	9.40977e-05	8.6734e-05	0	0	2.72138e-05	4.76179e-05	0	0	0	0	0	0	0	0	0	k__Bacteria	p__Actinobacteria	c__Actinobacteria	o__Actinomycetales	f__Microbacteriaceae	g__Cryocola	s__	3359685		k__Bacteria;p__Actinobacteria;c__Actinobacteria;o__Actinomycetales;f__Microbacteriaceae;g__Cryocola;s__
OTU10014	5.93589e-05	2.35244e-05	0.000455354	3.10116e-05	2.24593e-05	5.44277e-05	9.52358e-05	0.000416493	0	0	0	2.08372e-05	0	2.58545e-05	0	0	k__Bacteria	p__Actinobacteria	c__Actinobacteria	o__Actinomycetales	f__Microbacteriaceae	g__Microbacterium	s__	1123167		k__Bacteria;p__Actinobacteria;c__Actinobacteria;o__Actinomycetales;f__Microbacteriaceae;g__Microbacterium;s__
OTU7367	5.93589e-05	0	0.000173468	0	0	0	4.76179e-05	0.000138831	0	0	2.18384e-05	0	0	0	0	0	k__Bacteria	p__Actinobacteria	c__Actinobacteria	o__Actinomycetales	f__Micrococcaceae	g__	s__	1106113		k__Bacteria;p__Actinobacteria;c__Actinobacteria;o__Actinomycetales;f__Micrococcaceae;g__;s__
OTU3418	0.000949743	0.000188195	0.00110586	0.000279104	6.73779e-05	0.000326566	0.00045237	0.000948679	0	0	0	0	0	0	0	0	k__Bacteria	p__Actinobacteria	c__Actinobacteria	o__Actinomycetales	f__Micrococcaceae	g__	s__	725990		k__Bacteria;p__Actinobacteria;c__Actinobacteria;o__Actinomycetales;f__Micrococcaceae;g__;s__
OTU12085	0	2.35244e-05	4.3367e-05	6.20232e-05	4.49186e-05	2.72138e-05	7.14269e-05	0.000254524	0	0	0	0	0	0	0	0	k__Bacteria	p__Actinobacteria	c__Actinobacteria	o__Actinomycetales	f__Micromonosporaceae	g__	s__	New.ReferenceOTU301		k__Bacteria;p__Actinobacteria;c__Actinobacteria;o__Actinomycetales;f__Micromonosporaceae;g__;s__
OTU3198	0.000118718	0.000117622	0.000151785	0.000155058	0.000247052	0	4.76179e-05	2.31385e-05	2.63657e-05	0	0	0	0	5.1709e-05	2.4785e-05	1.83496e-05	k__Bacteria	p__Actinobacteria	c__Actinobacteria	o__Actinomycetales	f__Micromonosporaceae	g__	s__	1137749		k__Bacteria;p__Actinobacteria;c__Actinobacteria;o__Actinomycetales;f__Micromonosporaceae;g__;s__
OTU2727	0.000474871	0.00150556	0.000325253	9.30348e-05	2.24593e-05	2.72138e-05	0.000428561	0.000185108	0	5.38054e-05	0	0	0	0	0	1.83496e-05	k__Bacteria	p__Actinobacteria	c__Actinobacteria	o__Actinomycetales	f__Micromonosporaceae	g__	s__	554420		k__Bacteria;p__Actinobacteria;c__Actinobacteria;o__Actinomycetales;f__Micromonosporaceae;g__;s__
OTU391	0.000514444	0.000329342	0.000303569	9.30348e-05	0.000179674	0.000217711	0.000404752	0.000208247	0	2.69027e-05	0	0	2.41645e-05	2.58545e-05	2.4785e-05	1.83496e-05	k__Bacteria	p__Actinobacteria	c__Actinobacteria	o__Actinomycetales	f__Micromonosporaceae	g__	s__	369289		k__Bacteria;p__Actinobacteria;c__Actinobacteria;o__Actinomycetales;f__Micromonosporaceae;g__;s__
OTU7214	0.000138504	0.000164671	2.16835e-05	0.000124046	4.49186e-05	0	7.14269e-05	0.00016197	0	0.000887789	0	6.25117e-05	0	0	2.4785e-05	3.66993e-05	k__Bacteria	p__Actinobacteria	c__Actinobacteria	o__Actinomycetales	f__Micromonosporaceae	g__	s__	249571		k__Bacteria;p__Actinobacteria;c__Actinobacteria;o__Actinomycetales;f__Micromonosporaceae;g__;s__
OTU5365	1.97863e-05	0	0.000173468	3.10116e-05	0.000134756	0	0.000142854	9.2554e-05	0	0	0	0	0	0	0	0	k__Bacteria	p__Actinobacteria	c__Actinobacteria	o__Actinomycetales	f__Micromonosporaceae	g__	s__	222581		k__Bacteria;p__Actinobacteria;c__Actinobacteria;o__Actinomycetales;f__Micromonosporaceae;g__;s__
OTU7051	0.00162248	0.00157614	0.00110586	0.000868325	0.00096575	0.000517063	0.00130949	0.000439632	2.63657e-05	0.00145275	6.55151e-05	6.25117e-05	0.000144987	0.000155127	2.4785e-05	0.000568839	k__Bacteria	p__Actinobacteria	c__Actinobacteria	o__Actinomycetales	f__Micromonosporaceae	g__	s__	112244		k__Bacteria;p__Actinobacteria;c__Actinobacteria;o__Actinomycetales;f__Micromonosporaceae;g__;s__
OTU11398	0.000237436	4.70489e-05	4.3367e-05	9.30348e-05	0	0	2.3809e-05	4.6277e-05	2.63657e-05	2.69027e-05	0	2.08372e-05	0	0	0	0	k__Bacteria	p__Actinobacteria	c__Actinobacteria	o__Actinomycetales	f__Micromonosporaceae	g__	s__	85407		k__Bacteria;p__Actinobacteria;c__Actinobacteria;o__Actinomycetales;f__Micromonosporaceae;g__;s__
OTU57128	7.91452e-05	7.05733e-05	0.000238519	0.000155058	0	0	4.76179e-05	9.2554e-05	0	0	0	0	0	0	0	0	k__Bacteria	p__Actinobacteria	c__Actinobacteria	o__Actinomycetales	f__Micromonosporaceae	g__Dactylosporangium	s__	New.CleanUp.ReferenceOTU280891		k__Bacteria;p__Actinobacteria;c__Actinobacteria;o__Actinomycetales;f__Micromonosporaceae;g__Dactylosporangium;s__
OTU6369	0.00122675	0.00159966	0.000520404	0.000434162	0.000606401	8.16415e-05	0.000309516	0.000254524	0	0	2.18384e-05	2.08372e-05	2.41645e-05	0	0	1.83496e-05	k__Bacteria	p__Actinobacteria	c__Actinobacteria	o__Actinomycetales	f__Micromonosporaceae	g__Dactylosporangium	s__	1546879		k__Bacteria;p__Actinobacteria;c__Actinobacteria;o__Actinomycetales;f__Micromonosporaceae;g__Dactylosporangium;s__
OTU5639	0.000633162	0.00063516	0.000542088	0.000155058	8.98372e-05	5.44277e-05	0.000285707	0.000555324	0	0	0	0	0	0	0	0	k__Bacteria	p__Actinobacteria	c__Actinobacteria	o__Actinomycetales	f__Micromonosporaceae	g__Pilimelia	s__	931593		k__Bacteria;p__Actinobacteria;c__Actinobacteria;o__Actinomycetales;f__Micromonosporaceae;g__Pilimelia;s__
OTU3585	0.000178077	0.000164671	0.000108418	0	0	5.44277e-05	7.14269e-05	0.000138831	0	0	0	0	0	0	0	0	k__Bacteria	p__Actinobacteria	c__Actinobacteria	o__Actinomycetales	f__Micromonosporaceae	g__Pilimelia	s__	731014		k__Bacteria;p__Actinobacteria;c__Actinobacteria;o__Actinomycetales;f__Micromonosporaceae;g__Pilimelia;s__
OTU4067	0.0014444	0.00138794	0.000390303	0.000279104	2.24593e-05	0	7.14269e-05	0.000138831	2.63657e-05	5.38054e-05	0	0	0	0	0	0	k__Bacteria	p__Actinobacteria	c__Actinobacteria	o__Actinomycetales	f__Micromonosporaceae	g__Pilimelia	s__	593492		k__Bacteria;p__Actinobacteria;c__Actinobacteria;o__Actinomycetales;f__Micromonosporaceae;g__Pilimelia;s__
OTU23688	0.000514444	4.70489e-05	6.50505e-05	0.00018607	0	0	0	6.94155e-05	0	0	0	0	0	0	0	0	k__Bacteria	p__Actinobacteria	c__Actinobacteria	o__Actinomycetales	f__Mycobacteriaceae	g__Mycobacterium	s__	New.CleanUp.ReferenceOTU69398		k__Bacteria;p__Actinobacteria;c__Actinobacteria;o__Actinomycetales;f__Mycobacteriaceae;g__Mycobacterium;s__
OTU8634	0	0	0.000195152	0.000434162	0.000157215	0.000136069	0.000142854	0.000138831	5.27315e-05	2.69027e-05	0	0	9.6658e-05	0	0	5.50489e-05	k__Bacteria	p__Actinobacteria	c__Actinobacteria	o__Actinomycetales	f__Mycobacteriaceae	g__Mycobacterium	s__	4459446		k__Bacteria;p__Actinobacteria;c__Actinobacteria;o__Actinomycetales;f__Mycobacteriaceae;g__Mycobacterium;s__
OTU10403	3.95726e-05	0.000376391	0.000585455	0.000279104	2.24593e-05	5.44277e-05	0.000428561	0.000185108	0	2.69027e-05	0	0	0.000144987	2.58545e-05	0	3.66993e-05	k__Bacteria	p__Actinobacteria	c__Actinobacteria	o__Actinomycetales	f__Mycobacteriaceae	g__Mycobacterium	s__	4390723		k__Bacteria;p__Actinobacteria;c__Actinobacteria;o__Actinomycetales;f__Mycobacteriaceae;g__Mycobacterium;s__
OTU4029	0.000455085	2.35244e-05	0.000932391	0.000713267	4.49186e-05	2.72138e-05	0.000547606	0.000555324	0	0	0	0	0	0	0	1.83496e-05	k__Bacteria	p__Actinobacteria	c__Actinobacteria	o__Actinomycetales	f__Mycobacteriaceae	g__Mycobacterium	s__	946945		k__Bacteria;p__Actinobacteria;c__Actinobacteria;o__Actinomycetales;f__Mycobacteriaceae;g__Mycobacterium;s__
OTU6182	0.000850811	0.000682208	0.000151785	0.000496186	4.49186e-05	0	0	0.000115693	0	2.69027e-05	4.36767e-05	0	4.8329e-05	0	0	3.66993e-05	k__Bacteria	p__Actinobacteria	c__Actinobacteria	o__Actinomycetales	f__Mycobacteriaceae	g__Mycobacterium	s__	902334		k__Bacteria;p__Actinobacteria;c__Actinobacteria;o__Actinomycetales;f__Mycobacteriaceae;g__Mycobacterium;s__
OTU11500	5.93589e-05	0	4.3367e-05	9.30348e-05	6.73779e-05	0	0	6.94155e-05	0	0	0	0	0	0	0	0	k__Bacteria	p__Actinobacteria	c__Actinobacteria	o__Actinomycetales	f__Mycobacteriaceae	g__Mycobacterium	s__	823633		k__Bacteria;p__Actinobacteria;c__Actinobacteria;o__Actinomycetales;f__Mycobacteriaceae;g__Mycobacterium;s__
OTU3483	0.00282944	0.00223482	0.0060497	0.00676053	0.00300955	2.72138e-05	0.0026666	0.000370216	0	0	0	0	0	2.58545e-05	0	0	k__Bacteria	p__Actinobacteria	c__Actinobacteria	o__Actinomycetales	f__Mycobacteriaceae	g__Mycobacterium	s__	546972		k__Bacteria;p__Actinobacteria;c__Actinobacteria;o__Actinomycetales;f__Mycobacteriaceae;g__Mycobacterium;s__
OTU11495	0.00120696	0.000588111	0.000542088	0.00096136	0.000179674	0	0.000404752	0.000185108	0	0	0	0	0	0	0	0	k__Bacteria	p__Actinobacteria	c__Actinobacteria	o__Actinomycetales	f__Mycobacteriaceae	g__Mycobacterium	s__	354851		k__Bacteria;p__Actinobacteria;c__Actinobacteria;o__Actinomycetales;f__Mycobacteriaceae;g__Mycobacterium;s__
OTU542	0.00310645	0.0022113	0.000737239	0.000837313	2.24593e-05	5.44277e-05	4.76179e-05	0.000832986	0	0	0	0	2.41645e-05	0	0	0	k__Bacteria	p__Actinobacteria	c__Actinobacteria	o__Actinomycetales	f__Mycobacteriaceae	g__Mycobacterium	s__	13074		k__Bacteria;p__Actinobacteria;c__Actinobacteria;o__Actinomycetales;f__Mycobacteriaceae;g__Mycobacterium;s__
OTU8147	5.93589e-05	4.70489e-05	0.000195152	3.10116e-05	4.49186e-05	0	2.3809e-05	4.6277e-05	0	0	0	0	0	0	0	0	k__Bacteria	p__Actinobacteria	c__Actinobacteria	o__Actinomycetales	f__Nocardioidaceae	g__	s__	3936243		k__Bacteria;p__Actinobacteria;c__Actinobacteria;o__Actinomycetales;f__Nocardioidaceae;g__;s__
OTU4524	0.00075188	0.000446964	4.3367e-05	3.10116e-05	0.000157215	5.44277e-05	2.3809e-05	0.000370216	0	0.000188319	2.18384e-05	0	0	0	0	3.66993e-05	k__Bacteria	p__Actinobacteria	c__Actinobacteria	o__Actinomycetales	f__Nocardioidaceae	g__	s__	778968		k__Bacteria;p__Actinobacteria;c__Actinobacteria;o__Actinomycetales;f__Nocardioidaceae;g__;s__
OTU8089	3.95726e-05	2.35244e-05	6.50505e-05	6.20232e-05	2.24593e-05	2.72138e-05	4.76179e-05	4.6277e-05	0	0	0	0	0	0	0	0	k__Bacteria	p__Actinobacteria	c__Actinobacteria	o__Actinomycetales	f__Nocardioidaceae	g__	s__	528213		k__Bacteria;p__Actinobacteria;c__Actinobacteria;o__Actinomycetales;f__Nocardioidaceae;g__;s__
OTU7281	0.00015829	2.35244e-05	8.6734e-05	0	6.73779e-05	2.72138e-05	0.000119045	0.000115693	0	0	0	0	0	0	0	0	k__Bacteria	p__Actinobacteria	c__Actinobacteria	o__Actinomycetales	f__Nocardioidaceae	g__	s__	512378		k__Bacteria;p__Actinobacteria;c__Actinobacteria;o__Actinomycetales;f__Nocardioidaceae;g__;s__
OTU4952	3.95726e-05	9.40977e-05	0.000173468	9.30348e-05	6.73779e-05	8.16415e-05	0	4.6277e-05	0	5.38054e-05	0	0	0	2.58545e-05	0	0	k__Bacteria	p__Actinobacteria	c__Actinobacteria	o__Actinomycetales	f__Nocardioidaceae	g__	s__	324217		k__Bacteria;p__Actinobacteria;c__Actinobacteria;o__Actinomycetales;f__Nocardioidaceae;g__;s__
OTU8443	0.000237436	0.000117622	0.000325253	3.10116e-05	0.000202134	0.000136069	0.000190472	2.31385e-05	5.27315e-05	0.000107611	0.00013103	2.08372e-05	4.8329e-05	5.1709e-05	4.957e-05	0.000220196	k__Bacteria	p__Actinobacteria	c__Actinobacteria	o__Actinomycetales	f__Nocardioidaceae	g__	s__	211507		k__Bacteria;p__Actinobacteria;c__Actinobacteria;o__Actinomycetales;f__Nocardioidaceae;g__;s__
OTU5615	0.000178077	2.35244e-05	2.16835e-05	0.000124046	0	0	9.52358e-05	0	0	0	0	0	0	0	0	0	k__Bacteria	p__Actinobacteria	c__Actinobacteria	o__Actinomycetales	f__Nocardioidaceae	g__	s__	133306		k__Bacteria;p__Actinobacteria;c__Actinobacteria;o__Actinomycetales;f__Nocardioidaceae;g__;s__
OTU231	0.000118718	0.000164671	0.000195152	0.000155058	6.73779e-05	0.000136069	9.52358e-05	0.000208247	0	2.69027e-05	0	0	0	0	0	1.83496e-05	k__Bacteria	p__Actinobacteria	c__Actinobacteria	o__Actinomycetales	f__Nocardioidaceae	g__Kribbella	s__	558911		k__Bacteria;p__Actinobacteria;c__Actinobacteria;o__Actinomycetales;f__Nocardioidaceae;g__Kribbella;s__
OTU4111	0.00542145	0.0102567	0.000130101	0.00173665	0.000516564	2.72138e-05	0.00069046	0.00215188	0	0	2.18384e-05	0	0	0	0	3.66993e-05	k__Bacteria	p__Actinobacteria	c__Actinobacteria	o__Actinomycetales	f__Nocardioidaceae	g__Kribbella	s__	247758		k__Bacteria;p__Actinobacteria;c__Actinobacteria;o__Actinomycetales;f__Nocardioidaceae;g__Kribbella;s__
OTU1665	5.93589e-05	0.000188195	0.000607138	0.000279104	6.73779e-05	0	0.000119045	0.000370216	0	0	0	0	0	2.58545e-05	0	0	k__Bacteria	p__Actinobacteria	c__Actinobacteria	o__Actinomycetales	f__Nocardioidaceae	g__Nocardioides	s__	1000876		k__Bacteria;p__Actinobacteria;c__Actinobacteria;o__Actinomycetales;f__Nocardioidaceae;g__Nocardioides;s__
OTU6331	0.00015829	7.05733e-05	0.000607138	0.00018607	0	0	0	4.6277e-05	0	0	0	0	0	0	0	0	k__Bacteria	p__Actinobacteria	c__Actinobacteria	o__Actinomycetales	f__Propionibacteriaceae	g__	s__	834883		k__Bacteria;p__Actinobacteria;c__Actinobacteria;o__Actinomycetales;f__Propionibacteriaceae;g__;s__
OTU11685	1.97863e-05	0	0.000455354	0.000124046	4.49186e-05	2.72138e-05	9.52358e-05	0.000671017	0	0	0	0	0	0	0	0	k__Bacteria	p__Actinobacteria	c__Actinobacteria	o__Actinomycetales	f__Pseudonocardiaceae	g__	s__	New.ReferenceOTU379		k__Bacteria;p__Actinobacteria;c__Actinobacteria;o__Actinomycetales;f__Pseudonocardiaceae;g__;s__
OTU5797	9.89315e-05	2.35244e-05	0	3.10116e-05	6.73779e-05	0	2.3809e-05	0.000254524	0	0	0	0	0	0	0	0	k__Bacteria	p__Actinobacteria	c__Actinobacteria	o__Actinomycetales	f__Pseudonocardiaceae	g__	s__	1105878		k__Bacteria;p__Actinobacteria;c__Actinobacteria;o__Actinomycetales;f__Pseudonocardiaceae;g__;s__
OTU3258	9.89315e-05	0.000141147	0.000130101	0.000124046	4.49186e-05	0	0.000119045	0.000208247	7.90972e-05	2.69027e-05	0	0	0	0	0	1.83496e-05	k__Bacteria	p__Actinobacteria	c__Actinobacteria	o__Actinomycetales	f__Pseudonocardiaceae	g__Amycolatopsis	s__	3043332		k__Bacteria;p__Actinobacteria;c__Actinobacteria;o__Actinomycetales;f__Pseudonocardiaceae;g__Amycolatopsis;s__
OTU4088	0	9.40977e-05	2.16835e-05	6.20232e-05	0.000516564	0.000163283	0.000119045	0	2.63657e-05	0	0	2.08372e-05	0	5.1709e-05	0	5.50489e-05	k__Bacteria	p__Actinobacteria	c__Actinobacteria	o__Actinomycetales	f__Pseudonocardiaceae	g__Amycolatopsis	s__	55691		k__Bacteria;p__Actinobacteria;c__Actinobacteria;o__Actinomycetales;f__Pseudonocardiaceae;g__Amycolatopsis;s__
OTU11593	1.97863e-05	2.35244e-05	0.000195152	0.000248093	4.49186e-05	0.000217711	0.000357134	0.000300801	0	0	0	0	0	0	0	0	k__Bacteria	p__Actinobacteria	c__Actinobacteria	o__Actinomycetales	f__Pseudonocardiaceae	g__Pseudonocardia	s__	New.ReferenceOTU789		k__Bacteria;p__Actinobacteria;c__Actinobacteria;o__Actinomycetales;f__Pseudonocardiaceae;g__Pseudonocardia;s__
OTU3318	3.95726e-05	2.35244e-05	2.16835e-05	0.000155058	0.000539023	0.000136069	0.000333325	0	7.90972e-05	5.38054e-05	4.36767e-05	4.16745e-05	4.8329e-05	0	0	5.50489e-05	k__Bacteria	p__Actinobacteria	c__Actinobacteria	o__Actinomycetales	f__Pseudonocardiaceae	g__Pseudonocardia	s__	2595164		k__Bacteria;p__Actinobacteria;c__Actinobacteria;o__Actinomycetales;f__Pseudonocardiaceae;g__Pseudonocardia;s__
OTU6807	1.97863e-05	0.000164671	6.50505e-05	0.000403151	0.000516564	5.44277e-05	0.000333325	0.000578463	0	2.69027e-05	0	0	0	0	0	0	k__Bacteria	p__Actinobacteria	c__Actinobacteria	o__Actinomycetales	f__Pseudonocardiaceae	g__Pseudonocardia	s__	947354		k__Bacteria;p__Actinobacteria;c__Actinobacteria;o__Actinomycetales;f__Pseudonocardiaceae;g__Pseudonocardia;s__
OTU5936	0.000356154	0.000352866	4.3367e-05	0.000682255	2.24593e-05	0	0.000142854	0.000115693	0	0	0	0	0	0	0	1.83496e-05	k__Bacteria	p__Actinobacteria	c__Actinobacteria	o__Actinomycetales	f__Pseudonocardiaceae	g__Pseudonocardia	s__	244494		k__Bacteria;p__Actinobacteria;c__Actinobacteria;o__Actinomycetales;f__Pseudonocardiaceae;g__Pseudonocardia;s__
OTU2130	0.000415512	0.000329342	0.000151785	0.00018607	0	0	2.3809e-05	2.31385e-05	0	0	0	0	0	0	0	0	k__Bacteria	p__Actinobacteria	c__Actinobacteria	o__Actinomycetales	f__Pseudonocardiaceae	g__Pseudonocardia	s__	114587		k__Bacteria;p__Actinobacteria;c__Actinobacteria;o__Actinomycetales;f__Pseudonocardiaceae;g__Pseudonocardia;s__
OTU9447	7.91452e-05	7.05733e-05	0.000108418	9.30348e-05	0	2.72138e-05	0	2.31385e-05	2.63657e-05	0	0	0	0	0	0	0	k__Bacteria	p__Actinobacteria	c__Actinobacteria	o__Actinomycetales	f__Sporichthyaceae	g__Sporichthya	s__	286878		k__Bacteria;p__Actinobacteria;c__Actinobacteria;o__Actinomycetales;f__Sporichthyaceae;g__Sporichthya;s__
OTU2448	7.91452e-05	0.000305818	0.00036862	9.30348e-05	0.000516564	0.000190497	0.000357134	0.000370216	2.63657e-05	0	0	0	0	0	0	7.33985e-05	k__Bacteria	p__Actinobacteria	c__Actinobacteria	o__Actinomycetales	f__Streptomycetaceae	g__	s__	812972		k__Bacteria;p__Actinobacteria;c__Actinobacteria;o__Actinomycetales;f__Streptomycetaceae;g__;s__
OTU6412	0.000514444	0.000799831	0.000845657	0.000837313	0.00096575	0.000217711	0.000380943	0.000763571	0.000158194	0.000322832	6.55151e-05	0	0	2.58545e-05	9.914e-05	0.000146797	k__Bacteria	p__Actinobacteria	c__Actinobacteria	o__Actinomycetales	f__Streptomycetaceae	g__	s__	250724		k__Bacteria;p__Actinobacteria;c__Actinobacteria;o__Actinomycetales;f__Streptomycetaceae;g__;s__
OTU5420	3.95726e-05	4.70489e-05	2.16835e-05	6.20232e-05	0	0	2.3809e-05	4.6277e-05	0	0	0	0	0	0	0	0	k__Bacteria	p__Actinobacteria	c__Actinobacteria	o__Actinomycetales	f__Streptomycetaceae	g__Streptomyces	s__	4467439		k__Bacteria;p__Actinobacteria;c__Actinobacteria;o__Actinomycetales;f__Streptomycetaceae;g__Streptomyces;s__
OTU9516	1.97863e-05	0.000141147	0.000260202	0.000434162	0.000426727	8.16415e-05	0.000357134	0.00016197	0	2.69027e-05	0	4.16745e-05	0	2.58545e-05	0	0.000128447	k__Bacteria	p__Actinobacteria	c__Actinobacteria	o__Actinomycetales	f__Streptomycetaceae	g__Streptomyces	s__	1138397		k__Bacteria;p__Actinobacteria;c__Actinobacteria;o__Actinomycetales;f__Streptomycetaceae;g__Streptomyces;s__
OTU9872	0.000118718	2.35244e-05	0.000195152	9.30348e-05	6.73779e-05	8.16415e-05	9.52358e-05	0.000138831	0	0	0	0	0	2.58545e-05	0	0	k__Bacteria	p__Actinobacteria	c__Actinobacteria	o__Actinomycetales	f__Streptomycetaceae	g__Streptomyces	s__	1124784		k__Bacteria;p__Actinobacteria;c__Actinobacteria;o__Actinomycetales;f__Streptomycetaceae;g__Streptomyces;s__
OTU7624	0	4.70489e-05	0.000108418	0.000124046	2.24593e-05	2.72138e-05	0.00102379	0.00104123	0	0	0	0	0	0	0	0	k__Bacteria	p__Actinobacteria	c__Actinobacteria	o__Actinomycetales	f__Streptomycetaceae	g__Streptomyces	s__	343365		k__Bacteria;p__Actinobacteria;c__Actinobacteria;o__Actinomycetales;f__Streptomycetaceae;g__Streptomyces;s__
OTU2569	0.000178077	0.000258769	0	0	2.24593e-05	8.16415e-05	0	4.6277e-05	0	0	0	0	0	0	0	0	k__Bacteria	p__Actinobacteria	c__Actinobacteria	o__Actinomycetales	f__Streptosporangiaceae	g__	s__	586084		k__Bacteria;p__Actinobacteria;c__Actinobacteria;o__Actinomycetales;f__Streptosporangiaceae;g__;s__
OTU1967	0	2.35244e-05	2.16835e-05	6.20232e-05	0.000202134	5.44277e-05	2.3809e-05	0.000138831	0	2.69027e-05	0	0	0	0	2.4785e-05	0	k__Bacteria	p__Actinobacteria	c__Actinobacteria	o__Actinomycetales	f__Thermomonosporaceae	g__	s__	221865		k__Bacteria;p__Actinobacteria;c__Actinobacteria;o__Actinomycetales;f__Thermomonosporaceae;g__;s__
OTU11670	0	0	4.3367e-05	6.20232e-05	4.49186e-05	0	9.52358e-05	4.6277e-05	0	0	0	0	0	0	0	0	k__Bacteria	p__Actinobacteria	c__Actinobacteria	o__Actinomycetales	f__Thermomonosporaceae	g__Actinoallomurus	s__iriomotensis	New.ReferenceOTU678		k__Bacteria;p__Actinobacteria;c__Actinobacteria;o__Actinomycetales;f__Thermomonosporaceae;g__Actinoallomurus;s__iriomotensis
OTU3103	1.97863e-05	4.70489e-05	0.000151785	0.00058922	0.000134756	0.000108855	2.3809e-05	4.6277e-05	0.000158194	0.000215222	2.18384e-05	0	2.41645e-05	0	0	0.000128447	k__Bacteria	p__Actinobacteria	c__Actinobacteria	o__Actinomycetales	f__Thermomonosporaceae	g__Actinoallomurus	s__iriomotensis	4331429		k__Bacteria;p__Actinobacteria;c__Actinobacteria;o__Actinomycetales;f__Thermomonosporaceae;g__Actinoallomurus;s__iriomotensis
OTU12377	0.000712307	0.000682208	0.000932391	9.30348e-05	0	0	2.3809e-05	4.6277e-05	0	0	0	0	0	0	0	0	k__Bacteria	p__Actinobacteria	c__MB-A2-108	o__0319-7L14	f__	g__	s__	New.ReferenceOTU55		k__Bacteria;p__Actinobacteria;c__MB-A2-108;o__0319-7L14;f__;g__;s__
OTU11850	7.91452e-05	9.40977e-05	0.000346936	0.000403151	4.49186e-05	2.72138e-05	0.000333325	0.00118006	0	0	0	0	0	0	0	0	k__Bacteria	p__Actinobacteria	c__MB-A2-108	o__0319-7L14	f__	g__	s__	New.ReferenceOTU415		k__Bacteria;p__Actinobacteria;c__MB-A2-108;o__0319-7L14;f__;g__;s__
OTU5141	0.00668777	0.00397563	0.000910707	0.000124046	0	0	0	0.000254524	2.63657e-05	0	0	0	0	0	0	0	k__Bacteria	p__Actinobacteria	c__MB-A2-108	o__0319-7L14	f__	g__	s__	1142871		k__Bacteria;p__Actinobacteria;c__MB-A2-108;o__0319-7L14;f__;g__;s__
OTU10376	0.00132568	0.000964502	0.000151785	0.000124046	2.24593e-05	0	0.000166663	0	0	0	0	0	0	0	0	0	k__Bacteria	p__Actinobacteria	c__MB-A2-108	o__0319-7L14	f__	g__	s__	946179		k__Bacteria;p__Actinobacteria;c__MB-A2-108;o__0319-7L14;f__;g__;s__
OTU7310	9.89315e-05	9.40977e-05	8.6734e-05	6.20232e-05	0	8.16415e-05	0	0.000138831	0	0	0	0	0	0	0	0	k__Bacteria	p__Actinobacteria	c__MB-A2-108	o__0319-7L14	f__	g__	s__	224718		k__Bacteria;p__Actinobacteria;c__MB-A2-108;o__0319-7L14;f__;g__;s__
OTU11474	3.95726e-05	0.000729257	0.00153953	0.000806302	6.73779e-05	0	0.000285707	9.2554e-05	0	0	0	0	0	0	0	0	k__Bacteria	p__Actinobacteria	c__MB-A2-108	o__0319-7L14	f__	g__	s__	224648		k__Bacteria;p__Actinobacteria;c__MB-A2-108;o__0319-7L14;f__;g__;s__
OTU11551	5.93589e-05	4.70489e-05	0.000151785	0.000217081	0.000112296	2.72138e-05	7.14269e-05	0.000254524	0	2.69027e-05	0	0	0	0	0	0	k__Bacteria	p__Actinobacteria	c__Thermoleophilia	o__Gaiellales	f__	g__	s__	New.ReferenceOTU1020		k__Bacteria;p__Actinobacteria;c__Thermoleophilia;o__Gaiellales;f__;g__;s__
OTU28017	0	2.35244e-05	2.16835e-05	9.30348e-05	6.73779e-05	0.000190497	0.000404752	0.000185108	0	0.000107611	0	0	0	0	0	1.83496e-05	k__Bacteria	p__Actinobacteria	c__Thermoleophilia	o__Gaiellales	f__	g__	s__	New.CleanUp.ReferenceOTU97597		k__Bacteria;p__Actinobacteria;c__Thermoleophilia;o__Gaiellales;f__;g__;s__
OTU46208	9.89315e-05	7.05733e-05	0.000151785	0.000124046	2.24593e-05	0	7.14269e-05	4.6277e-05	0	2.69027e-05	0	0	0	0	0	0	k__Bacteria	p__Actinobacteria	c__Thermoleophilia	o__Gaiellales	f__	g__	s__	New.CleanUp.ReferenceOTU213036		k__Bacteria;p__Actinobacteria;c__Thermoleophilia;o__Gaiellales;f__;g__;s__
OTU5260	0	0	8.6734e-05	0.000279104	0.000336889	0.000108855	0.00111902	4.6277e-05	0	0	0	0	0	2.58545e-05	0	0	k__Bacteria	p__Actinobacteria	c__Thermoleophilia	o__Gaiellales	f__	g__	s__	882516		k__Bacteria;p__Actinobacteria;c__Thermoleophilia;o__Gaiellales;f__;g__;s__
OTU10035	0	4.70489e-05	0.000195152	3.10116e-05	4.49186e-05	0	0.000214281	0.000254524	0	0	0	0	0	0	0	0	k__Bacteria	p__Actinobacteria	c__Thermoleophilia	o__Gaiellales	f__	g__	s__	872889		k__Bacteria;p__Actinobacteria;c__Thermoleophilia;o__Gaiellales;f__;g__;s__
OTU8158	0.00015829	0.000611635	0.0015829	0.0013335	0.00321168	0.000326566	0.00438085	0.00166597	5.27315e-05	0.000107611	4.36767e-05	0	0	0	0	0	k__Bacteria	p__Actinobacteria	c__Thermoleophilia	o__Gaiellales	f__	g__	s__	625508		k__Bacteria;p__Actinobacteria;c__Thermoleophilia;o__Gaiellales;f__;g__;s__
OTU8946	0.000474871	9.40977e-05	0.000173468	0	0	5.44277e-05	2.3809e-05	0	0	0	0	0	0	0	0	0	k__Bacteria	p__Actinobacteria	c__Thermoleophilia	o__Gaiellales	f__	g__	s__	512663		k__Bacteria;p__Actinobacteria;c__Thermoleophilia;o__Gaiellales;f__;g__;s__
OTU1944	5.93589e-05	2.35244e-05	6.50505e-05	0.000124046	8.98372e-05	2.72138e-05	0.000285707	0.000138831	0	0	0	0	0	0	0	0	k__Bacteria	p__Actinobacteria	c__Thermoleophilia	o__Gaiellales	f__	g__	s__	213580		k__Bacteria;p__Actinobacteria;c__Thermoleophilia;o__Gaiellales;f__;g__;s__
OTU9043	0.000316581	0.000305818	0.00104081	0.00111642	0.000561482	0.000136069	0.000309516	0.00111065	0	5.38054e-05	0	0	0	2.58545e-05	0	3.66993e-05	k__Bacteria	p__Actinobacteria	c__Thermoleophilia	o__Gaiellales	f__	g__	s__	206038		k__Bacteria;p__Actinobacteria;c__Thermoleophilia;o__Gaiellales;f__;g__;s__
OTU12309	1.97863e-05	0.000188195	0.000151785	3.10116e-05	0.000426727	0.000843629	0.000785696	0.000555324	0.000105463	8.07081e-05	0	2.08372e-05	0	0.000103418	0	1.83496e-05	k__Bacteria	p__Actinobacteria	c__Thermoleophilia	o__Gaiellales	f__Gaiellaceae	g__	s__	New.ReferenceOTU87		k__Bacteria;p__Actinobacteria;c__Thermoleophilia;o__Gaiellales;f__Gaiellaceae;g__;s__
OTU12177	9.89315e-05	0.000188195	2.16835e-05	0.000372139	0	0	0	0.000856125	0	0	0	0	0	0	0	0	k__Bacteria	p__Actinobacteria	c__Thermoleophilia	o__Gaiellales	f__Gaiellaceae	g__	s__	New.ReferenceOTU616		k__Bacteria;p__Actinobacteria;c__Thermoleophilia;o__Gaiellales;f__Gaiellaceae;g__;s__
OTU12246	0.000217649	9.40977e-05	0.000173468	9.30348e-05	0.000291971	8.16415e-05	0.000190472	0.000254524	0	2.69027e-05	0	0	0	0	0	0	k__Bacteria	p__Actinobacteria	c__Thermoleophilia	o__Gaiellales	f__Gaiellaceae	g__	s__	New.ReferenceOTU60		k__Bacteria;p__Actinobacteria;c__Thermoleophilia;o__Gaiellales;f__Gaiellaceae;g__;s__
OTU11543	1.97863e-05	0	8.6734e-05	0.000403151	0.000336889	0.000136069	0.000285707	0.00016197	0	2.69027e-05	0	0	0	0	0	0	k__Bacteria	p__Actinobacteria	c__Thermoleophilia	o__Gaiellales	f__Gaiellaceae	g__	s__	New.ReferenceOTU5		k__Bacteria;p__Actinobacteria;c__Thermoleophilia;o__Gaiellales;f__Gaiellaceae;g__;s__
OTU57720	5.93589e-05	7.05733e-05	0.000195152	0.00018607	0.000336889	5.44277e-05	0.000380943	0.000416493	0	0	0	0	0	0	2.4785e-05	0	k__Bacteria	p__Actinobacteria	c__Thermoleophilia	o__Gaiellales	f__Gaiellaceae	g__	s__	New.CleanUp.ReferenceOTU284462		k__Bacteria;p__Actinobacteria;c__Thermoleophilia;o__Gaiellales;f__Gaiellaceae;g__;s__
OTU4102	0.00219628	0.00103507	0.000108418	0.000558209	0	0	0	0.000671017	0	0	0	0	0	0	0	0	k__Bacteria	p__Actinobacteria	c__Thermoleophilia	o__Gaiellales	f__Gaiellaceae	g__	s__	4393921		k__Bacteria;p__Actinobacteria;c__Thermoleophilia;o__Gaiellales;f__Gaiellaceae;g__;s__
OTU3070	0	0.000164671	0.000477037	0.000155058	0.000875912	0.00247646	0.00188091	0.000370216	5.27315e-05	2.69027e-05	0.000152868	0	2.41645e-05	2.58545e-05	0	0.000238545	k__Bacteria	p__Actinobacteria	c__Thermoleophilia	o__Gaiellales	f__Gaiellaceae	g__	s__	4310013		k__Bacteria;p__Actinobacteria;c__Thermoleophilia;o__Gaiellales;f__Gaiellaceae;g__;s__
OTU1452	0.00221607	0.00207015	0.000910707	0.00158159	2.24593e-05	2.72138e-05	0.000119045	0.00104123	0	0	0	0	0	0	0	0	k__Bacteria	p__Actinobacteria	c__Thermoleophilia	o__Gaiellales	f__Gaiellaceae	g__	s__	3334375		k__Bacteria;p__Actinobacteria;c__Thermoleophilia;o__Gaiellales;f__Gaiellaceae;g__;s__
OTU10263	1.97863e-05	0.000729257	0.000823973	0.00111642	0.00206625	0.00356501	0.00369039	0.00326253	2.63657e-05	0.000726373	0.000589636	2.08372e-05	4.8329e-05	0.000284399	0.00014871	0.000697286	k__Bacteria	p__Actinobacteria	c__Thermoleophilia	o__Gaiellales	f__Gaiellaceae	g__	s__	1094433		k__Bacteria;p__Actinobacteria;c__Thermoleophilia;o__Gaiellales;f__Gaiellaceae;g__;s__
OTU6055	0.000435299	0.000517537	6.50505e-05	0.000465174	0.000830994	0.000136069	0.000404752	0.00106437	0	0	0	0	0	0	0	0	k__Bacteria	p__Actinobacteria	c__Thermoleophilia	o__Gaiellales	f__Gaiellaceae	g__	s__	1054879		k__Bacteria;p__Actinobacteria;c__Thermoleophilia;o__Gaiellales;f__Gaiellaceae;g__;s__
OTU4565	0	2.35244e-05	0.000195152	0.000124046	0.000336889	0.000244925	0.000809505	0.000601601	0	0	0	0	0	0	0	1.83496e-05	k__Bacteria	p__Actinobacteria	c__Thermoleophilia	o__Gaiellales	f__Gaiellaceae	g__	s__	1009717		k__Bacteria;p__Actinobacteria;c__Thermoleophilia;o__Gaiellales;f__Gaiellaceae;g__;s__
OTU3338	0.000178077	2.35244e-05	0.000260202	0.000155058	0.000179674	5.44277e-05	0.000119045	4.6277e-05	0	0	0	0	0	0	0	0	k__Bacteria	p__Actinobacteria	c__Thermoleophilia	o__Gaiellales	f__Gaiellaceae	g__	s__	1000512		k__Bacteria;p__Actinobacteria;c__Thermoleophilia;o__Gaiellales;f__Gaiellaceae;g__;s__
OTU4042	0.000455085	2.35244e-05	0.000130101	0.00117844	0.000134756	0	7.14269e-05	0.00157342	0	0	0	0	0	0	0	0	k__Bacteria	p__Actinobacteria	c__Thermoleophilia	o__Gaiellales	f__Gaiellaceae	g__	s__	957360		k__Bacteria;p__Actinobacteria;c__Thermoleophilia;o__Gaiellales;f__Gaiellaceae;g__;s__
OTU9118	0.000435299	0.000517537	0.0018431	0.00232587	0.00615385	0.00100691	0.0026666	0.00293859	0.000105463	8.07081e-05	0.000414929	0.000125023	7.24935e-05	0.000103418	9.914e-05	0.00135787	k__Bacteria	p__Actinobacteria	c__Thermoleophilia	o__Gaiellales	f__Gaiellaceae	g__	s__	936318		k__Bacteria;p__Actinobacteria;c__Thermoleophilia;o__Gaiellales;f__Gaiellaceae;g__;s__
OTU11209	0	0	0.000346936	3.10116e-05	4.49186e-05	0	9.52358e-05	0.000370216	0	0	0	0	0	0	0	0	k__Bacteria	p__Actinobacteria	c__Thermoleophilia	o__Gaiellales	f__Gaiellaceae	g__	s__	855860		k__Bacteria;p__Actinobacteria;c__Thermoleophilia;o__Gaiellales;f__Gaiellaceae;g__;s__
OTU5801	5.93589e-05	7.05733e-05	0.000173468	3.10116e-05	2.24593e-05	0	2.3809e-05	0.000277662	0	0	0	0	0	0	0	0	k__Bacteria	p__Actinobacteria	c__Thermoleophilia	o__Gaiellales	f__Gaiellaceae	g__	s__	817630		k__Bacteria;p__Actinobacteria;c__Thermoleophilia;o__Gaiellales;f__Gaiellaceae;g__;s__
OTU5311	1.97863e-05	0.000988026	0.00132269	0.00127148	0.000179674	2.72138e-05	0.000619033	0.00198991	0	0	0	0	0	0	0	0	k__Bacteria	p__Actinobacteria	c__Thermoleophilia	o__Gaiellales	f__Gaiellaceae	g__	s__	816291		k__Bacteria;p__Actinobacteria;c__Thermoleophilia;o__Gaiellales;f__Gaiellaceae;g__;s__
OTU6924	0.00148397	0.00195253	0.00140943	0.000682255	0.00107805	0.000108855	0.00069046	0.00148086	2.63657e-05	0.000134513	2.18384e-05	0	0	0	2.4785e-05	3.66993e-05	k__Bacteria	p__Actinobacteria	c__Thermoleophilia	o__Gaiellales	f__Gaiellaceae	g__	s__	811263		k__Bacteria;p__Actinobacteria;c__Thermoleophilia;o__Gaiellales;f__Gaiellaceae;g__;s__
OTU9262	0.000296795	0.000305818	0.000238519	0.00130249	0.00123526	0.000761988	0.000785696	0.001504	2.63657e-05	8.07081e-05	0.000152868	0	7.24935e-05	0.000155127	0	7.33985e-05	k__Bacteria	p__Actinobacteria	c__Thermoleophilia	o__Gaiellales	f__Gaiellaceae	g__	s__	755123		k__Bacteria;p__Actinobacteria;c__Thermoleophilia;o__Gaiellales;f__Gaiellaceae;g__;s__
OTU1021	0.000712307	0.000541062	0.000195152	3.10116e-05	0.000112296	2.72138e-05	9.52358e-05	6.94155e-05	0	0	0	0	0	0	0	0	k__Bacteria	p__Actinobacteria	c__Thermoleophilia	o__Gaiellales	f__Gaiellaceae	g__	s__	564610		k__Bacteria;p__Actinobacteria;c__Thermoleophilia;o__Gaiellales;f__Gaiellaceae;g__;s__
OTU375	0.00132568	0.000352866	0.00104081	0.00077529	0	0	4.76179e-05	0.000185108	0	0	0	0	0	0	0	0	k__Bacteria	p__Actinobacteria	c__Thermoleophilia	o__Gaiellales	f__Gaiellaceae	g__	s__	561452		k__Bacteria;p__Actinobacteria;c__Thermoleophilia;o__Gaiellales;f__Gaiellaceae;g__;s__
OTU9565	0.00241393	0.00127032	0.000303569	0.000992371	2.24593e-05	0	0.000119045	0.000254524	0	0	0	0	0	0	4.957e-05	0	k__Bacteria	p__Actinobacteria	c__Thermoleophilia	o__Gaiellales	f__Gaiellaceae	g__	s__	368218		k__Bacteria;p__Actinobacteria;c__Thermoleophilia;o__Gaiellales;f__Gaiellaceae;g__;s__
OTU8392	0	2.35244e-05	6.50505e-05	9.30348e-05	0.000112296	0	7.14269e-05	0.000138831	0	0	0	0	0	0	0	0	k__Bacteria	p__Actinobacteria	c__Thermoleophilia	o__Gaiellales	f__Gaiellaceae	g__	s__	356027		k__Bacteria;p__Actinobacteria;c__Thermoleophilia;o__Gaiellales;f__Gaiellaceae;g__;s__
OTU807	0.00128611	0.00150556	0.00258034	0.000403151	0.00305446	0	0.000547606	0.00384099	0	2.69027e-05	0	0	0	0	0	0	k__Bacteria	p__Actinobacteria	c__Thermoleophilia	o__Gaiellales	f__Gaiellaceae	g__	s__	332788		k__Bacteria;p__Actinobacteria;c__Thermoleophilia;o__Gaiellales;f__Gaiellaceae;g__;s__
OTU11055	0	2.35244e-05	0.000130101	0.000496186	0.000786075	0	0.000309516	0.000509047	0	0	0	0	0	0	0	0	k__Bacteria	p__Actinobacteria	c__Thermoleophilia	o__Gaiellales	f__Gaiellaceae	g__	s__	239437		k__Bacteria;p__Actinobacteria;c__Thermoleophilia;o__Gaiellales;f__Gaiellaceae;g__;s__
OTU1618	3.95726e-05	2.35244e-05	0.000173468	0.00108541	0.00251544	8.16415e-05	0.000119045	0.00173539	0	0	0	0	0	0	0	0	k__Bacteria	p__Actinobacteria	c__Thermoleophilia	o__Gaiellales	f__Gaiellaceae	g__	s__	237139		k__Bacteria;p__Actinobacteria;c__Thermoleophilia;o__Gaiellales;f__Gaiellaceae;g__;s__
OTU7353	0.000237436	0.00199958	0.00201657	0.00424859	0.011836	0.016927	0.0129521	0.00629367	7.90972e-05	0.000484248	0.0031884	6.25117e-05	0.000169152	0.00178396	2.4785e-05	0.00111933	k__Bacteria	p__Actinobacteria	c__Thermoleophilia	o__Gaiellales	f__Gaiellaceae	g__	s__	220013		k__Bacteria;p__Actinobacteria;c__Thermoleophilia;o__Gaiellales;f__Gaiellaceae;g__;s__
OTU1333	0.00229521	0.000399915	0.00357778	0.0056131	0.00419989	0.000244925	0.00273803	0.00640937	0	0	0	0	0	0	0	0	k__Bacteria	p__Actinobacteria	c__Thermoleophilia	o__Gaiellales	f__Gaiellaceae	g__	s__	219818		k__Bacteria;p__Actinobacteria;c__Thermoleophilia;o__Gaiellales;f__Gaiellaceae;g__;s__
OTU7697	0.000138504	0.000258769	0.000411987	0.000434162	0.000269512	0.000244925	2.3809e-05	0.000393355	0	0	2.18384e-05	2.08372e-05	0	2.58545e-05	0	3.66993e-05	k__Bacteria	p__Actinobacteria	c__Thermoleophilia	o__Gaiellales	f__Gaiellaceae	g__	s__	216189		k__Bacteria;p__Actinobacteria;c__Thermoleophilia;o__Gaiellales;f__Gaiellaceae;g__;s__
OTU1708	9.89315e-05	0.000823355	0.000477037	0.00058922	0.00305446	0.00220432	0.000261899	0.00219816	0.000210926	0.000215222	0.000371252	4.16745e-05	2.41645e-05	0.000155127	4.957e-05	1.83496e-05	k__Bacteria	p__Actinobacteria	c__Thermoleophilia	o__Gaiellales	f__Gaiellaceae	g__	s__	214128		k__Bacteria;p__Actinobacteria;c__Thermoleophilia;o__Gaiellales;f__Gaiellaceae;g__;s__
OTU5634	0.000455085	0.000870404	0.000672189	0.00096136	0.000426727	0.00209547	0.00209519	0.00196677	0	0.000107611	0	0	0	0	0	0.000238545	k__Bacteria	p__Actinobacteria	c__Thermoleophilia	o__Gaiellales	f__Gaiellaceae	g__	s__	208423		k__Bacteria;p__Actinobacteria;c__Thermoleophilia;o__Gaiellales;f__Gaiellaceae;g__;s__
OTU9088	0.000178077	0.000729257	0.000889024	0.00114743	0.00161707	0.000789202	0.00173805	0.000185108	0.000210926	0.000645665	0.000327575	0.000333396	0.000289974	0.000491235	7.4355e-05	0.000422042	k__Bacteria	p__Actinobacteria	c__Thermoleophilia	o__Gaiellales	f__Gaiellaceae	g__	s__	204862		k__Bacteria;p__Actinobacteria;c__Thermoleophilia;o__Gaiellales;f__Gaiellaceae;g__;s__
OTU7640	3.95726e-05	9.40977e-05	8.6734e-05	0.000155058	8.98372e-05	0	0.000166663	0.000185108	0	0	0	0	0	0	0	0	k__Bacteria	p__Actinobacteria	c__Thermoleophilia	o__Gaiellales	f__Gaiellaceae	g__	s__	200046		k__Bacteria;p__Actinobacteria;c__Thermoleophilia;o__Gaiellales;f__Gaiellaceae;g__;s__
OTU10121	0.000118718	0.000141147	0.000607138	0.000868325	0.000112296	0.000489849	0.000880931	0.000948679	0	0	0	0	0	0	0	0	k__Bacteria	p__Actinobacteria	c__Thermoleophilia	o__Gaiellales	f__Gaiellaceae	g__	s__	160311		k__Bacteria;p__Actinobacteria;c__Thermoleophilia;o__Gaiellales;f__Gaiellaceae;g__;s__
OTU161	0	0	6.50505e-05	0	0.000112296	8.16415e-05	9.52358e-05	2.31385e-05	0	0	0	0	0	0	0	0	k__Bacteria	p__Actinobacteria	c__Thermoleophilia	o__Gaiellales	f__Gaiellaceae	g__	s__	27571		k__Bacteria;p__Actinobacteria;c__Thermoleophilia;o__Gaiellales;f__Gaiellaceae;g__;s__
OTU12200	7.91452e-05	7.05733e-05	4.3367e-05	3.10116e-05	4.49186e-05	0	0.000119045	4.6277e-05	0	0	0	0	0	0	0	0	k__Bacteria	p__Actinobacteria	c__Thermoleophilia	o__Solirubrobacterales	f__	g__	s__	New.ReferenceOTU507		k__Bacteria;p__Actinobacteria;c__Thermoleophilia;o__Solirubrobacterales;f__;g__;s__
OTU11837	0.000178077	0.000188195	0.000281886	0.000465174	0.000494104	0	0	0.000647878	0	0	0	0	0	0	0	0	k__Bacteria	p__Actinobacteria	c__Thermoleophilia	o__Solirubrobacterales	f__	g__	s__	New.ReferenceOTU382		k__Bacteria;p__Actinobacteria;c__Thermoleophilia;o__Solirubrobacterales;f__;g__;s__
OTU28284	0	2.35244e-05	6.50505e-05	3.10116e-05	4.49186e-05	8.16415e-05	0.000357134	0.000115693	0	0	0	0	0	0	0	0	k__Bacteria	p__Actinobacteria	c__Thermoleophilia	o__Solirubrobacterales	f__	g__	s__	New.CleanUp.ReferenceOTU99261		k__Bacteria;p__Actinobacteria;c__Thermoleophilia;o__Solirubrobacterales;f__;g__;s__
OTU13080	0	0	2.16835e-05	0.000124046	2.24593e-05	2.72138e-05	0.000214281	6.94155e-05	0	5.38054e-05	0	0	0	0	0	1.83496e-05	k__Bacteria	p__Actinobacteria	c__Thermoleophilia	o__Solirubrobacterales	f__	g__	s__	New.CleanUp.ReferenceOTU3996		k__Bacteria;p__Actinobacteria;c__Thermoleophilia;o__Solirubrobacterales;f__;g__;s__
OTU59001	5.93589e-05	7.05733e-05	0.000108418	6.20232e-05	0.000157215	2.72138e-05	0.000119045	9.2554e-05	0	0	0	0	0	0	0	0	k__Bacteria	p__Actinobacteria	c__Thermoleophilia	o__Solirubrobacterales	f__	g__	s__	New.CleanUp.ReferenceOTU292439		k__Bacteria;p__Actinobacteria;c__Thermoleophilia;o__Solirubrobacterales;f__;g__;s__
OTU53549	0.00015829	9.40977e-05	2.16835e-05	3.10116e-05	6.73779e-05	0	4.76179e-05	0.000277662	0	0	0	0	0	0	0	0	k__Bacteria	p__Actinobacteria	c__Thermoleophilia	o__Solirubrobacterales	f__	g__	s__	New.CleanUp.ReferenceOTU258144		k__Bacteria;p__Actinobacteria;c__Thermoleophilia;o__Solirubrobacterales;f__;g__;s__
OTU46818	0	0	4.3367e-05	9.30348e-05	0.00152723	0.000789202	2.3809e-05	0	0	0	0	2.08372e-05	0	2.58545e-05	0	0	k__Bacteria	p__Actinobacteria	c__Thermoleophilia	o__Solirubrobacterales	f__	g__	s__	New.CleanUp.ReferenceOTU216865		k__Bacteria;p__Actinobacteria;c__Thermoleophilia;o__Solirubrobacterales;f__;g__;s__
OTU41545	7.91452e-05	0.000141147	2.16835e-05	9.30348e-05	0.000539023	0	0	0.00016197	0	0	0	0	0	0	0	0	k__Bacteria	p__Actinobacteria	c__Thermoleophilia	o__Solirubrobacterales	f__	g__	s__	New.CleanUp.ReferenceOTU184954		k__Bacteria;p__Actinobacteria;c__Thermoleophilia;o__Solirubrobacterales;f__;g__;s__
OTU1322	0.000257222	7.05733e-05	0.000195152	0.000155058	4.49186e-05	0	0.000190472	0.000138831	0	0	0	0	0	0	0	0	k__Bacteria	p__Actinobacteria	c__Thermoleophilia	o__Solirubrobacterales	f__	g__	s__	4479035		k__Bacteria;p__Actinobacteria;c__Thermoleophilia;o__Solirubrobacterales;f__;g__;s__
OTU10742	3.95726e-05	2.35244e-05	0.000151785	9.30348e-05	0.000112296	0	0	0.000138831	0	2.69027e-05	0	0	0	0	0	0	k__Bacteria	p__Actinobacteria	c__Thermoleophilia	o__Solirubrobacterales	f__	g__	s__	4465496		k__Bacteria;p__Actinobacteria;c__Thermoleophilia;o__Solirubrobacterales;f__;g__;s__
OTU6686	0	4.70489e-05	2.16835e-05	0.000124046	6.73779e-05	2.72138e-05	0.000166663	6.94155e-05	0	0	0	0	0	0	0	1.83496e-05	k__Bacteria	p__Actinobacteria	c__Thermoleophilia	o__Solirubrobacterales	f__	g__	s__	4446112		k__Bacteria;p__Actinobacteria;c__Thermoleophilia;o__Solirubrobacterales;f__;g__;s__
OTU10218	0.000217649	0.000117622	0.000823973	0.00114743	0.00141494	5.44277e-05	0.000166663	0.00148086	0	0	0	0	0	0	0	0	k__Bacteria	p__Actinobacteria	c__Thermoleophilia	o__Solirubrobacterales	f__	g__	s__	3231020		k__Bacteria;p__Actinobacteria;c__Thermoleophilia;o__Solirubrobacterales;f__;g__;s__
OTU4396	7.91452e-05	0.000117622	0.000542088	0.000713267	0.000291971	0	0.000190472	0.000601601	0	0	0	0	0	0	0	0	k__Bacteria	p__Actinobacteria	c__Thermoleophilia	o__Solirubrobacterales	f__	g__	s__	968261		k__Bacteria;p__Actinobacteria;c__Thermoleophilia;o__Solirubrobacterales;f__;g__;s__
OTU3395	0.00304709	0.00127032	0.00190815	0.00263599	0.00168445	0.00185054	0.00588081	0.00328567	7.90972e-05	0.00139894	0.000939049	0.000166698	0.00161902	0.00168054	0.0013136	0.000605538	k__Bacteria	p__Actinobacteria	c__Thermoleophilia	o__Solirubrobacterales	f__	g__	s__	965853		k__Bacteria;p__Actinobacteria;c__Thermoleophilia;o__Solirubrobacterales;f__;g__;s__
OTU8161	0	0	0.000173468	0.000155058	0.00031443	8.16415e-05	0.000190472	0.000555324	0	0	0	0	0	0	0	0	k__Bacteria	p__Actinobacteria	c__Thermoleophilia	o__Solirubrobacterales	f__	g__	s__	928111		k__Bacteria;p__Actinobacteria;c__Thermoleophilia;o__Solirubrobacterales;f__;g__;s__
OTU7065	7.91452e-05	0.000446964	0	6.20232e-05	8.98372e-05	0	2.3809e-05	4.6277e-05	0	0	0	0	0	0	0	0	k__Bacteria	p__Actinobacteria	c__Thermoleophilia	o__Solirubrobacterales	f__	g__	s__	864304		k__Bacteria;p__Actinobacteria;c__Thermoleophilia;o__Solirubrobacterales;f__;g__;s__
OTU939	0	4.70489e-05	8.6734e-05	6.20232e-05	0.000583942	0.000217711	0.00069046	0.000509047	0	0	0	0	0	0	0	0	k__Bacteria	p__Actinobacteria	c__Thermoleophilia	o__Solirubrobacterales	f__	g__	s__	794417		k__Bacteria;p__Actinobacteria;c__Thermoleophilia;o__Solirubrobacterales;f__;g__;s__
OTU10252	0.000178077	7.05733e-05	0	0	0.000112296	2.72138e-05	0.000142854	0.000115693	0	0	0	0	0	0	0	0	k__Bacteria	p__Actinobacteria	c__Thermoleophilia	o__Solirubrobacterales	f__	g__	s__	594023		k__Bacteria;p__Actinobacteria;c__Thermoleophilia;o__Solirubrobacterales;f__;g__;s__
OTU5989	0.000435299	0.000141147	6.50505e-05	0.000248093	2.24593e-05	0.000299352	4.76179e-05	0	0	2.69027e-05	0	0	0	0	0	1.83496e-05	k__Bacteria	p__Actinobacteria	c__Thermoleophilia	o__Solirubrobacterales	f__	g__	s__	583293		k__Bacteria;p__Actinobacteria;c__Thermoleophilia;o__Solirubrobacterales;f__;g__;s__
OTU5863	0.000692521	0.00063516	0.000390303	0.000651244	0.00125772	0.00127905	0.00176186	0.00118006	7.90972e-05	0.000242124	0.000458605	0.000104186	0.000144987	0.000310254	0.00019828	0.000220196	k__Bacteria	p__Actinobacteria	c__Thermoleophilia	o__Solirubrobacterales	f__	g__	s__	319944		k__Bacteria;p__Actinobacteria;c__Thermoleophilia;o__Solirubrobacterales;f__;g__;s__
OTU1586	5.93589e-05	0.00021172	0.000542088	0.00058922	8.98372e-05	0	0.000190472	6.94155e-05	0	2.69027e-05	0	0	0	0	0	0	k__Bacteria	p__Actinobacteria	c__Thermoleophilia	o__Solirubrobacterales	f__	g__	s__	249975		k__Bacteria;p__Actinobacteria;c__Thermoleophilia;o__Solirubrobacterales;f__;g__;s__
OTU10924	0.000732093	0.000376391	2.16835e-05	0.000217081	8.98372e-05	0	0	9.2554e-05	0	0	0	0	0	0	0	0	k__Bacteria	p__Actinobacteria	c__Thermoleophilia	o__Solirubrobacterales	f__	g__	s__	240715		k__Bacteria;p__Actinobacteria;c__Thermoleophilia;o__Solirubrobacterales;f__;g__;s__
OTU3300	0.00431342	0.00261121	0.00307906	0.000372139	0.00195396	5.44277e-05	0.000380943	0.00286917	0	0	0	0	0	0	0	0	k__Bacteria	p__Actinobacteria	c__Thermoleophilia	o__Solirubrobacterales	f__	g__	s__	235293		k__Bacteria;p__Actinobacteria;c__Thermoleophilia;o__Solirubrobacterales;f__;g__;s__
OTU1055	0.000316581	0.000682208	0.000130101	3.10116e-05	0.00137002	0	0.000285707	0.000717294	0	0	0	0	0	0	0	0	k__Bacteria	p__Actinobacteria	c__Thermoleophilia	o__Solirubrobacterales	f__	g__	s__	217880		k__Bacteria;p__Actinobacteria;c__Thermoleophilia;o__Solirubrobacterales;f__;g__;s__
OTU151	7.91452e-05	7.05733e-05	0.000303569	3.10116e-05	0.000696238	0	0.000285707	0.000509047	0	0	0	0	0	0	0	0	k__Bacteria	p__Actinobacteria	c__Thermoleophilia	o__Solirubrobacterales	f__	g__	s__	207283		k__Bacteria;p__Actinobacteria;c__Thermoleophilia;o__Solirubrobacterales;f__;g__;s__
OTU9335	1.97863e-05	0	2.16835e-05	0.000155058	0.000202134	2.72138e-05	0.000285707	0.00111065	0	0	0	0	0	0	0	0	k__Bacteria	p__Actinobacteria	c__Thermoleophilia	o__Solirubrobacterales	f__	g__	s__	200629		k__Bacteria;p__Actinobacteria;c__Thermoleophilia;o__Solirubrobacterales;f__;g__;s__
OTU12135	5.93589e-05	0.00021172	0.000281886	9.30348e-05	0	0	4.76179e-05	6.94155e-05	0	0	0	0	0	0	0	0	k__Bacteria	p__Actinobacteria	c__Thermoleophilia	o__Solirubrobacterales	f__Conexibacteraceae	g__	s__	New.ReferenceOTU478		k__Bacteria;p__Actinobacteria;c__Thermoleophilia;o__Solirubrobacterales;f__Conexibacteraceae;g__;s__
OTU12282	0	7.05733e-05	0	0.000124046	0.00170691	0.00318402	0.00164282	0.000740432	0	0	0.000109192	2.08372e-05	0	0	0	0.000220196	k__Bacteria	p__Actinobacteria	c__Thermoleophilia	o__Solirubrobacterales	f__Conexibacteraceae	g__	s__	New.ReferenceOTU220		k__Bacteria;p__Actinobacteria;c__Thermoleophilia;o__Solirubrobacterales;f__Conexibacteraceae;g__;s__
OTU35012	0	0	4.3367e-05	0	0.000179674	0	0.000142854	6.94155e-05	0	0	2.18384e-05	0	0	0	0	0	k__Bacteria	p__Actinobacteria	c__Thermoleophilia	o__Solirubrobacterales	f__Conexibacteraceae	g__	s__	New.CleanUp.ReferenceOTU143247		k__Bacteria;p__Actinobacteria;c__Thermoleophilia;o__Solirubrobacterales;f__Conexibacteraceae;g__;s__
OTU6543	0	0	0	6.20232e-05	4.49186e-05	2.72138e-05	7.14269e-05	9.2554e-05	0	0	0	0	0	0	0	0	k__Bacteria	p__Actinobacteria	c__Thermoleophilia	o__Solirubrobacterales	f__Conexibacteraceae	g__	s__	1108925		k__Bacteria;p__Actinobacteria;c__Thermoleophilia;o__Solirubrobacterales;f__Conexibacteraceae;g__;s__
OTU3438	0.00015829	4.70489e-05	6.50505e-05	6.20232e-05	4.49186e-05	2.72138e-05	0.000190472	0.000185108	0	0.000107611	0	0	0	0	0	0	k__Bacteria	p__Actinobacteria	c__Thermoleophilia	o__Solirubrobacterales	f__Conexibacteraceae	g__	s__	1100123		k__Bacteria;p__Actinobacteria;c__Thermoleophilia;o__Solirubrobacterales;f__Conexibacteraceae;g__;s__
OTU9962	9.89315e-05	0.000188195	6.50505e-05	6.20232e-05	0.000718697	0	0.000547606	0.00111065	0	0	2.18384e-05	0	0	0	0	0	k__Bacteria	p__Actinobacteria	c__Thermoleophilia	o__Solirubrobacterales	f__Conexibacteraceae	g__	s__	895465		k__Bacteria;p__Actinobacteria;c__Thermoleophilia;o__Solirubrobacterales;f__Conexibacteraceae;g__;s__
OTU11993	0	9.40977e-05	0.000390303	0.000248093	0	0.000190497	0.000190472	0.000763571	2.63657e-05	0	4.36767e-05	2.08372e-05	2.41645e-05	0	2.4785e-05	1.83496e-05	k__Bacteria	p__Actinobacteria	c__Thermoleophilia	o__Solirubrobacterales	f__Patulibacteraceae	g__	s__	New.ReferenceOTU1093		k__Bacteria;p__Actinobacteria;c__Thermoleophilia;o__Solirubrobacterales;f__Patulibacteraceae;g__;s__
OTU1316	9.89315e-05	7.05733e-05	2.16835e-05	6.20232e-05	0.000157215	0	9.52358e-05	0.00016197	0	2.69027e-05	0	0	0	2.58545e-05	0	0	k__Bacteria	p__Actinobacteria	c__Thermoleophilia	o__Solirubrobacterales	f__Patulibacteraceae	g__	s__	1081618		k__Bacteria;p__Actinobacteria;c__Thermoleophilia;o__Solirubrobacterales;f__Patulibacteraceae;g__;s__
OTU9464	0.00225564	0.0030817	0.00138774	0.00244992	0.0020438	0.000108855	0.00111902	0.000555324	0	2.69027e-05	0	0	0	0	0	0	k__Bacteria	p__Actinobacteria	c__Thermoleophilia	o__Solirubrobacterales	f__Patulibacteraceae	g__	s__	994823		k__Bacteria;p__Actinobacteria;c__Thermoleophilia;o__Solirubrobacterales;f__Patulibacteraceae;g__;s__
OTU6497	1.97863e-05	0.000305818	0.000238519	6.20232e-05	0.000718697	2.72138e-05	0.000190472	0.000717294	0	0	0	0	0	0	0	0	k__Bacteria	p__Actinobacteria	c__Thermoleophilia	o__Solirubrobacterales	f__Patulibacteraceae	g__	s__	876717		k__Bacteria;p__Actinobacteria;c__Thermoleophilia;o__Solirubrobacterales;f__Patulibacteraceae;g__;s__
OTU8202	0	2.35244e-05	0.000151785	9.30348e-05	0.000336889	8.16415e-05	0.000380943	0.000323939	0	0	0	0	0	0	0	0	k__Bacteria	p__Actinobacteria	c__Thermoleophilia	o__Solirubrobacterales	f__Solirubrobacteraceae	g__	s__	4331731		k__Bacteria;p__Actinobacteria;c__Thermoleophilia;o__Solirubrobacterales;f__Solirubrobacteraceae;g__;s__
OTU10163	9.89315e-05	0.000823355	0.000563771	0.000713267	0.000134756	5.44277e-05	0.000309516	0.000485909	0.000210926	0.000107611	4.36767e-05	0	0	0.000129272	4.957e-05	0.000128447	k__Bacteria	p__Actinobacteria	c__Thermoleophilia	o__Solirubrobacterales	f__Solirubrobacteraceae	g__	s__	1129425		k__Bacteria;p__Actinobacteria;c__Thermoleophilia;o__Solirubrobacterales;f__Solirubrobacteraceae;g__;s__
OTU4472	0.000118718	7.05733e-05	0	0	6.73779e-05	0	7.14269e-05	2.31385e-05	0	2.69027e-05	0	0	0	0	0	0	k__Bacteria	p__Actinobacteria	c__Thermoleophilia	o__Solirubrobacterales	f__Solirubrobacteraceae	g__	s__	946344		k__Bacteria;p__Actinobacteria;c__Thermoleophilia;o__Solirubrobacterales;f__Solirubrobacteraceae;g__;s__
OTU721	0.00075188	0.000611635	0.000563771	3.10116e-05	0.000112296	0	0.000357134	0.000555324	0	5.38054e-05	0	0	0	0	0	0	k__Bacteria	p__Actinobacteria	c__Thermoleophilia	o__Solirubrobacterales	f__Solirubrobacteraceae	g__	s__	873887		k__Bacteria;p__Actinobacteria;c__Thermoleophilia;o__Solirubrobacterales;f__Solirubrobacteraceae;g__;s__
OTU1429	0.000237436	0.000329342	0.000108418	0.00018607	0	0	0	4.6277e-05	0	0	0	0	0	0	0	0	k__Bacteria	p__Actinobacteria	c__Thermoleophilia	o__Solirubrobacterales	f__Solirubrobacteraceae	g__	s__	240137		k__Bacteria;p__Actinobacteria;c__Thermoleophilia;o__Solirubrobacterales;f__Solirubrobacteraceae;g__;s__
OTU11156	0.00116739	0.000823355	0.000346936	0.000248093	0.000718697	0	9.52358e-05	2.31385e-05	2.63657e-05	0	0	0	0	2.58545e-05	0	0	k__Bacteria	p__Actinobacteria	c__Thermoleophilia	o__Solirubrobacterales	f__Solirubrobacteraceae	g__	s__	235943		k__Bacteria;p__Actinobacteria;c__Thermoleophilia;o__Solirubrobacterales;f__Solirubrobacteraceae;g__;s__
OTU10334	0.000217649	7.05733e-05	0.000173468	0.00018607	0.000426727	0	0.000214281	0.000601601	0	0	0	0	0	0	0	0	k__Bacteria	p__Actinobacteria	c__Thermoleophilia	o__Solirubrobacterales	f__Solirubrobacteraceae	g__	s__	203418		k__Bacteria;p__Actinobacteria;c__Thermoleophilia;o__Solirubrobacterales;f__Solirubrobacteraceae;g__;s__
OTU147	0.000138504	0.00190548	0.00134438	0.000682255	4.49186e-05	8.16415e-05	0.00045237	0.000809848	0.000105463	0.000107611	4.36767e-05	0	7.24935e-05	5.1709e-05	0	7.33985e-05	k__Bacteria	p__Actinobacteria	c__Thermoleophilia	o__Solirubrobacterales	f__Solirubrobacteraceae	g__	s__	112045		k__Bacteria;p__Actinobacteria;c__Thermoleophilia;o__Solirubrobacterales;f__Solirubrobacteraceae;g__;s__
OTU3780	0	7.05733e-05	4.3367e-05	0.000217081	0.000830994	0.000734774	0.000357134	4.6277e-05	2.63657e-05	2.69027e-05	2.18384e-05	0	4.8329e-05	0	0	5.50489e-05	k__Bacteria	p__Armatimonadetes	c__Chthonomonadetes	o__Chthonomonadales	f__Chthonomonadaceae	g__	s__	2661155		k__Bacteria;p__Armatimonadetes;c__Chthonomonadetes;o__Chthonomonadales;f__Chthonomonadaceae;g__;s__
OTU9337	0.000257222	0.000258769	4.3367e-05	3.10116e-05	0.000247052	5.44277e-05	2.3809e-05	9.2554e-05	0	0	0	0	0	0	0	0	k__Bacteria	p__Armatimonadetes	c__Chthonomonadetes	o__SJA-22	f__	g__	s__	1021365		k__Bacteria;p__Armatimonadetes;c__Chthonomonadetes;o__SJA-22;f__;g__;s__
OTU17750	0.00037594	0.00122327	0.000563771	6.20232e-05	0	0	0.000166663	0.000347078	0	0	0	0	0	0	0	0	k__Bacteria	p__Bacteroidetes	c__[Saprospirae]	o__[Saprospirales]	f__Chitinophagaceae	g__	s__	New.CleanUp.ReferenceOTU32365		k__Bacteria;p__Bacteroidetes;c__[Saprospirae];o__[Saprospirales];f__Chitinophagaceae;g__;s__
OTU14819	9.89315e-05	4.70489e-05	0.000108418	0	0	0	2.3809e-05	9.2554e-05	0	0	0	0	0	0	0	0	k__Bacteria	p__Bacteroidetes	c__[Saprospirae]	o__[Saprospirales]	f__Chitinophagaceae	g__	s__	New.CleanUp.ReferenceOTU14799		k__Bacteria;p__Bacteroidetes;c__[Saprospirae];o__[Saprospirales];f__Chitinophagaceae;g__;s__
OTU33040	7.91452e-05	0.000164671	0.000173468	6.20232e-05	2.24593e-05	2.72138e-05	4.76179e-05	0.00016197	0	2.69027e-05	0	0	0	0	0	0	k__Bacteria	p__Bacteroidetes	c__[Saprospirae]	o__[Saprospirales]	f__Chitinophagaceae	g__	s__	New.CleanUp.ReferenceOTU130128		k__Bacteria;p__Bacteroidetes;c__[Saprospirae];o__[Saprospirales];f__Chitinophagaceae;g__;s__
OTU2411	0.000277008	0.000329342	0.000130101	3.10116e-05	0	2.72138e-05	7.14269e-05	2.31385e-05	0	0	0	0	0	0	0	0	k__Bacteria	p__Bacteroidetes	c__[Saprospirae]	o__[Saprospirales]	f__Chitinophagaceae	g__	s__	4416962		k__Bacteria;p__Bacteroidetes;c__[Saprospirae];o__[Saprospirales];f__Chitinophagaceae;g__;s__
OTU8500	0.000178077	0.000117622	2.16835e-05	0	0	0	0.000119045	6.94155e-05	0	0	0	0	0	0	0	0	k__Bacteria	p__Bacteroidetes	c__[Saprospirae]	o__[Saprospirales]	f__Chitinophagaceae	g__	s__	4324314		k__Bacteria;p__Bacteroidetes;c__[Saprospirae];o__[Saprospirales];f__Chitinophagaceae;g__;s__
OTU4069	0.000138504	7.05733e-05	0.000346936	3.10116e-05	0	0	0.000119045	0.000185108	0	0	0	0	0	0	0	0	k__Bacteria	p__Bacteroidetes	c__[Saprospirae]	o__[Saprospirales]	f__Chitinophagaceae	g__	s__	1110836		k__Bacteria;p__Bacteroidetes;c__[Saprospirae];o__[Saprospirales];f__Chitinophagaceae;g__;s__
OTU4623	0.000296795	0.000164671	0.000563771	3.10116e-05	2.24593e-05	2.72138e-05	0.000166663	0.000439632	0	0	4.36767e-05	0	0	0	2.4785e-05	1.83496e-05	k__Bacteria	p__Bacteroidetes	c__[Saprospirae]	o__[Saprospirales]	f__Chitinophagaceae	g__	s__	1068155		k__Bacteria;p__Bacteroidetes;c__[Saprospirae];o__[Saprospirales];f__Chitinophagaceae;g__;s__
OTU4	0.000356154	0.000188195	0.000542088	0.000124046	6.73779e-05	5.44277e-05	7.14269e-05	0.000254524	0	2.69027e-05	0	0	4.8329e-05	0	4.957e-05	1.83496e-05	k__Bacteria	p__Bacteroidetes	c__[Saprospirae]	o__[Saprospirales]	f__Chitinophagaceae	g__	s__	973124		k__Bacteria;p__Bacteroidetes;c__[Saprospirae];o__[Saprospirales];f__Chitinophagaceae;g__;s__
OTU26	9.89315e-05	0.00021172	0.000477037	0.000248093	4.49186e-05	0	9.52358e-05	0.000115693	0	2.69027e-05	6.55151e-05	0	0	0	0	0	k__Bacteria	p__Bacteroidetes	c__[Saprospirae]	o__[Saprospirales]	f__Chitinophagaceae	g__	s__	929398		k__Bacteria;p__Bacteroidetes;c__[Saprospirae];o__[Saprospirales];f__Chitinophagaceae;g__;s__
OTU9791	0.00015829	0	0.000238519	0	2.24593e-05	0	0.000119045	9.2554e-05	0	2.69027e-05	2.18384e-05	0	0	0	0	0	k__Bacteria	p__Bacteroidetes	c__[Saprospirae]	o__[Saprospirales]	f__Chitinophagaceae	g__	s__	928766		k__Bacteria;p__Bacteroidetes;c__[Saprospirae];o__[Saprospirales];f__Chitinophagaceae;g__;s__
OTU6142	0.000178077	9.40977e-05	0.000390303	0.000217081	0	2.72138e-05	4.76179e-05	0.000509047	0	0	2.18384e-05	0	0	2.58545e-05	9.914e-05	0	k__Bacteria	p__Bacteroidetes	c__[Saprospirae]	o__[Saprospirales]	f__Chitinophagaceae	g__	s__	912263		k__Bacteria;p__Bacteroidetes;c__[Saprospirae];o__[Saprospirales];f__Chitinophagaceae;g__;s__
OTU3618	0.000435299	0.000305818	0.000585455	6.20232e-05	0	0	4.76179e-05	6.94155e-05	0	0	0	0	0	0	0	0	k__Bacteria	p__Bacteroidetes	c__[Saprospirae]	o__[Saprospirales]	f__Chitinophagaceae	g__	s__	889549		k__Bacteria;p__Bacteroidetes;c__[Saprospirae];o__[Saprospirales];f__Chitinophagaceae;g__;s__
OTU7606	1.97863e-05	7.05733e-05	4.3367e-05	6.20232e-05	4.49186e-05	0	4.76179e-05	0.000115693	0	0	2.18384e-05	0	0	0	0	1.83496e-05	k__Bacteria	p__Bacteroidetes	c__[Saprospirae]	o__[Saprospirales]	f__Chitinophagaceae	g__	s__	887484		k__Bacteria;p__Bacteroidetes;c__[Saprospirae];o__[Saprospirales];f__Chitinophagaceae;g__;s__
OTU51	0.000217649	0.00021172	0.000281886	0.00018607	2.24593e-05	8.16415e-05	4.76179e-05	0	0	2.69027e-05	4.36767e-05	0	0	2.58545e-05	0	7.33985e-05	k__Bacteria	p__Bacteroidetes	c__[Saprospirae]	o__[Saprospirales]	f__Chitinophagaceae	g__	s__	853114		k__Bacteria;p__Bacteroidetes;c__[Saprospirae];o__[Saprospirales];f__Chitinophagaceae;g__;s__
OTU6626	0	0	0.000672189	0.000155058	2.24593e-05	0	9.52358e-05	2.31385e-05	0	0	0	0	0	0	0	0	k__Bacteria	p__Bacteroidetes	c__[Saprospirae]	o__[Saprospirales]	f__Chitinophagaceae	g__	s__	809189		k__Bacteria;p__Bacteroidetes;c__[Saprospirae];o__[Saprospirales];f__Chitinophagaceae;g__;s__
OTU5748	1.97863e-05	0.000117622	0.000303569	0.000248093	0	5.44277e-05	0	0.000185108	0	0	0	2.08372e-05	0	0	0	0	k__Bacteria	p__Bacteroidetes	c__[Saprospirae]	o__[Saprospirales]	f__Chitinophagaceae	g__	s__	693348		k__Bacteria;p__Bacteroidetes;c__[Saprospirae];o__[Saprospirales];f__Chitinophagaceae;g__;s__
OTU1616	0.00172141	0.00291703	0.00401145	0.000465174	0.000247052	0.00481685	0.00342849	0.00437318	0.000316389	0.000726373	0.00185626	6.25117e-05	0.000144987	0.000646362	4.957e-05	0.00135787	k__Bacteria	p__Bacteroidetes	c__[Saprospirae]	o__[Saprospirales]	f__Chitinophagaceae	g__	s__	567628		k__Bacteria;p__Bacteroidetes;c__[Saprospirae];o__[Saprospirales];f__Chitinophagaceae;g__;s__
OTU7656	0.00160269	9.40977e-05	0.000607138	0.000124046	8.98372e-05	0	4.76179e-05	0.000115693	0	0	0	0	0	0	0	0	k__Bacteria	p__Bacteroidetes	c__[Saprospirae]	o__[Saprospirales]	f__Chitinophagaceae	g__	s__	325776		k__Bacteria;p__Bacteroidetes;c__[Saprospirae];o__[Saprospirales];f__Chitinophagaceae;g__;s__
OTU1307	0.000257222	9.40977e-05	0.000628822	0.000124046	0	0	4.76179e-05	0.000138831	0	0	4.36767e-05	0	0	0	0	7.33985e-05	k__Bacteria	p__Bacteroidetes	c__[Saprospirae]	o__[Saprospirales]	f__Chitinophagaceae	g__	s__	282480		k__Bacteria;p__Bacteroidetes;c__[Saprospirae];o__[Saprospirales];f__Chitinophagaceae;g__;s__
OTU4676	0.000217649	0.000305818	0.000281886	0.00018607	0	2.72138e-05	0	0.000254524	0	0	0	0	0	0	0	0	k__Bacteria	p__Bacteroidetes	c__[Saprospirae]	o__[Saprospirales]	f__Chitinophagaceae	g__	s__	257008		k__Bacteria;p__Bacteroidetes;c__[Saprospirae];o__[Saprospirales];f__Chitinophagaceae;g__;s__
OTU6328	0.000178077	0.000446964	0.000238519	0.000155058	0	0	0	4.6277e-05	0	2.69027e-05	0	0	0	0	0	0	k__Bacteria	p__Bacteroidetes	c__[Saprospirae]	o__[Saprospirales]	f__Chitinophagaceae	g__	s__	245652		k__Bacteria;p__Bacteroidetes;c__[Saprospirae];o__[Saprospirales];f__Chitinophagaceae;g__;s__
OTU4263	0.000138504	7.05733e-05	4.3367e-05	6.20232e-05	0	0	2.3809e-05	9.2554e-05	0	0	0	0	0	0	0	0	k__Bacteria	p__Bacteroidetes	c__[Saprospirae]	o__[Saprospirales]	f__Chitinophagaceae	g__	s__	219534		k__Bacteria;p__Bacteroidetes;c__[Saprospirae];o__[Saprospirales];f__Chitinophagaceae;g__;s__
OTU8318	0.00128611	0.000117622	0.000260202	0.00173665	0.000583942	8.16415e-05	0.00102379	0.00328567	0	0	0	0	0	0	0	0	k__Bacteria	p__Bacteroidetes	c__[Saprospirae]	o__[Saprospirales]	f__Chitinophagaceae	g__	s__	216350		k__Bacteria;p__Bacteroidetes;c__[Saprospirae];o__[Saprospirales];f__Chitinophagaceae;g__;s__
OTU7690	9.89315e-05	4.70489e-05	0.000151785	6.20232e-05	0	0	0	4.6277e-05	0	0	0	0	0	0	0	0	k__Bacteria	p__Bacteroidetes	c__[Saprospirae]	o__[Saprospirales]	f__Chitinophagaceae	g__	s__	216180		k__Bacteria;p__Bacteroidetes;c__[Saprospirae];o__[Saprospirales];f__Chitinophagaceae;g__;s__
OTU5511	0.000138504	2.35244e-05	0.000346936	0.000279104	0.00137002	0.000163283	0.000833313	0.000277662	5.27315e-05	8.07081e-05	8.73534e-05	0	7.24935e-05	0.000129272	2.4785e-05	0.000293594	k__Bacteria	p__Bacteroidetes	c__[Saprospirae]	o__[Saprospirales]	f__Chitinophagaceae	g__	s__	160422		k__Bacteria;p__Bacteroidetes;c__[Saprospirae];o__[Saprospirales];f__Chitinophagaceae;g__;s__
OTU2669	0.00162248	0.000141147	0.00214667	0.000558209	6.73779e-05	2.72138e-05	0.000261899	0.00129576	0	0	0	0	0	0	0	0	k__Bacteria	p__Bacteroidetes	c__[Saprospirae]	o__[Saprospirales]	f__Chitinophagaceae	g__	s__	112886		k__Bacteria;p__Bacteroidetes;c__[Saprospirae];o__[Saprospirales];f__Chitinophagaceae;g__;s__
OTU10361	0.00110803	0.000588111	0.00140943	9.30348e-05	0	2.72138e-05	0.000119045	0.000185108	0	0	0	0	0	0	0	0	k__Bacteria	p__Bacteroidetes	c__[Saprospirae]	o__[Saprospirales]	f__Saprospiraceae	g__	s__	758928		k__Bacteria;p__Bacteroidetes;c__[Saprospirae];o__[Saprospirales];f__Saprospiraceae;g__;s__
OTU19084	0	4.70489e-05	4.3367e-05	0	0.000112296	0.000163283	0.000142854	2.31385e-05	0	0	0	0	0	0	0	0	k__Bacteria	p__Bacteroidetes	c__Bacteroidia	o__Bacteroidales	f__	g__	s__	New.CleanUp.ReferenceOTU40727		k__Bacteria;p__Bacteroidetes;c__Bacteroidia;o__Bacteroidales;f__;g__;s__
OTU42864	1.97863e-05	0.00021172	0	0	6.73779e-05	0.000462635	0.000261899	9.2554e-05	0	0	8.73534e-05	0	0	0	0	0	k__Bacteria	p__Bacteroidetes	c__Bacteroidia	o__Bacteroidales	f__	g__	s__	New.CleanUp.ReferenceOTU192801		k__Bacteria;p__Bacteroidetes;c__Bacteroidia;o__Bacteroidales;f__;g__;s__
OTU38599	0.000217649	9.40977e-05	2.16835e-05	6.20232e-05	0	0.000326566	2.3809e-05	4.6277e-05	0	0	0	0	0	0	0	0	k__Bacteria	p__Bacteroidetes	c__Bacteroidia	o__Bacteroidales	f__	g__	s__	New.CleanUp.ReferenceOTU167124		k__Bacteria;p__Bacteroidetes;c__Bacteroidia;o__Bacteroidales;f__;g__;s__
OTU5855	5.93589e-05	9.40977e-05	0	0	0.000179674	0.000108855	2.3809e-05	0	0	0	0	0	0	0	0	0	k__Bacteria	p__Bacteroidetes	c__Bacteroidia	o__Bacteroidales	f__	g__	s__	1080007		k__Bacteria;p__Bacteroidetes;c__Bacteroidia;o__Bacteroidales;f__;g__;s__
OTU56254	0.00185991	0.000776306	8.6734e-05	9.30348e-05	0	0	2.3809e-05	2.31385e-05	0	0	0	0	0	0	0	0	k__Bacteria	p__Bacteroidetes	c__Cytophagia	o__Cytophagales	f__Cytophagaceae	g__	s__	New.CleanUp.ReferenceOTU275532		k__Bacteria;p__Bacteroidetes;c__Cytophagia;o__Cytophagales;f__Cytophagaceae;g__;s__
OTU4783	1.97863e-05	0.000117622	2.16835e-05	9.30348e-05	0	0.000108855	7.14269e-05	4.6277e-05	0	0	0	0	0	0	2.4785e-05	1.83496e-05	k__Bacteria	p__Bacteroidetes	c__Cytophagia	o__Cytophagales	f__Cytophagaceae	g__	s__	4303530		k__Bacteria;p__Bacteroidetes;c__Cytophagia;o__Cytophagales;f__Cytophagaceae;g__;s__
OTU2501	1.97863e-05	7.05733e-05	4.3367e-05	6.20232e-05	2.24593e-05	5.44277e-05	0.000190472	6.94155e-05	0	0	0	0	0	0	0	0	k__Bacteria	p__Bacteroidetes	c__Cytophagia	o__Cytophagales	f__Cytophagaceae	g__	s__	239396		k__Bacteria;p__Bacteroidetes;c__Cytophagia;o__Cytophagales;f__Cytophagaceae;g__;s__
OTU9533	0.000415512	0.000141147	2.16835e-05	6.20232e-05	0	0	0	0.000208247	0	0	0	0	0	0	0	0	k__Bacteria	p__Bacteroidetes	c__Cytophagia	o__Cytophagales	f__Cytophagaceae	g__Adhaeribacter	s__	1143359		k__Bacteria;p__Bacteroidetes;c__Cytophagia;o__Cytophagales;f__Cytophagaceae;g__Adhaeribacter;s__
OTU4894	0.000257222	9.40977e-05	0.000780606	0.000372139	2.24593e-05	0	0.000166663	0.000832986	0	2.69027e-05	0	0	0	0	0	3.66993e-05	k__Bacteria	p__Bacteroidetes	c__Cytophagia	o__Cytophagales	f__Cytophagaceae	g__Adhaeribacter	s__	1069076		k__Bacteria;p__Bacteroidetes;c__Cytophagia;o__Cytophagales;f__Cytophagaceae;g__Adhaeribacter;s__
OTU1702	1.97863e-05	7.05733e-05	4.3367e-05	6.20232e-05	2.24593e-05	0	2.3809e-05	9.2554e-05	0	0	0	0	0	0	0	0	k__Bacteria	p__Bacteroidetes	c__Cytophagia	o__Cytophagales	f__Cytophagaceae	g__Sporocytophaga	s__	1059885		k__Bacteria;p__Bacteroidetes;c__Cytophagia;o__Cytophagales;f__Cytophagaceae;g__Sporocytophaga;s__
OTU12322	0.000237436	9.40977e-05	0.000411987	0.00018607	0	0.000244925	0.000261899	0.000578463	0	0	0	2.08372e-05	0	0	0	5.50489e-05	k__Bacteria	p__Bacteroidetes	c__Flavobacteriia	o__Flavobacteriales	f__Flavobacteriaceae	g__Flavobacterium	s__	New.ReferenceOTU485		k__Bacteria;p__Bacteroidetes;c__Flavobacteriia;o__Flavobacteriales;f__Flavobacteriaceae;g__Flavobacterium;s__
OTU29902	3.95726e-05	0	4.3367e-05	9.30348e-05	0	0	2.3809e-05	0.000185108	0	0	0	0	0	0	0	0	k__Bacteria	p__Bacteroidetes	c__Flavobacteriia	o__Flavobacteriales	f__Flavobacteriaceae	g__Flavobacterium	s__	New.CleanUp.ReferenceOTU109959		k__Bacteria;p__Bacteroidetes;c__Flavobacteriia;o__Flavobacteriales;f__Flavobacteriaceae;g__Flavobacterium;s__
OTU1874	0.00037594	0.000188195	0.000628822	0.000248093	4.49186e-05	0	0.000166663	0.00016197	0	0	2.18384e-05	0	0	7.75635e-05	0	1.83496e-05	k__Bacteria	p__Bacteroidetes	c__Flavobacteriia	o__Flavobacteriales	f__Flavobacteriaceae	g__Flavobacterium	s__	1078167		k__Bacteria;p__Bacteroidetes;c__Flavobacteriia;o__Flavobacteriales;f__Flavobacteriaceae;g__Flavobacterium;s__
OTU11364	0.00124654	0.000541062	0.000889024	0.000124046	0	0	4.76179e-05	0.000902402	0	0	0	0	0	7.75635e-05	0	3.66993e-05	k__Bacteria	p__Bacteroidetes	c__Flavobacteriia	o__Flavobacteriales	f__Flavobacteriaceae	g__Flavobacterium	s__	1072673		k__Bacteria;p__Bacteroidetes;c__Flavobacteriia;o__Flavobacteriales;f__Flavobacteriaceae;g__Flavobacterium;s__
OTU1576	0.000474871	0.000588111	0.00169131	3.10116e-05	4.49186e-05	0.000190497	0.000595224	0.00178167	0	0	0.00013103	0	0	0.000491235	7.4355e-05	3.66993e-05	k__Bacteria	p__Bacteroidetes	c__Flavobacteriia	o__Flavobacteriales	f__Flavobacteriaceae	g__Flavobacterium	s__	582754		k__Bacteria;p__Bacteroidetes;c__Flavobacteriia;o__Flavobacteriales;f__Flavobacteriaceae;g__Flavobacterium;s__
OTU11947	0.000435299	0.00042344	0.000520404	0.000248093	4.49186e-05	0	7.14269e-05	9.2554e-05	0	0	0	0	0	0	0	0	k__Bacteria	p__Bacteroidetes	c__Sphingobacteriia	o__Sphingobacteriales	f__	g__	s__	New.ReferenceOTU593		k__Bacteria;p__Bacteroidetes;c__Sphingobacteriia;o__Sphingobacteriales;f__;g__;s__
OTU43168	0.000217649	4.70489e-05	0.000108418	0.000155058	2.24593e-05	0	0	0.000115693	0	0	0	0	0	0	0	0	k__Bacteria	p__Bacteroidetes	c__Sphingobacteriia	o__Sphingobacteriales	f__	g__	s__	New.CleanUp.ReferenceOTU194554		k__Bacteria;p__Bacteroidetes;c__Sphingobacteriia;o__Sphingobacteriales;f__;g__;s__
OTU6417	9.89315e-05	4.70489e-05	0.000108418	3.10116e-05	2.24593e-05	8.16415e-05	2.3809e-05	4.6277e-05	0	2.69027e-05	0	0	0	0	0	0	k__Bacteria	p__Bacteroidetes	c__Sphingobacteriia	o__Sphingobacteriales	f__	g__	s__	2775220		k__Bacteria;p__Bacteroidetes;c__Sphingobacteriia;o__Sphingobacteriales;f__;g__;s__
OTU4109	1.97863e-05	0.000141147	0.000303569	0	0	0	9.52358e-05	0.000185108	0	0	0	0	0	2.58545e-05	0	0	k__Bacteria	p__Bacteroidetes	c__Sphingobacteriia	o__Sphingobacteriales	f__	g__	s__	223126		k__Bacteria;p__Bacteroidetes;c__Sphingobacteriia;o__Sphingobacteriales;f__;g__;s__
OTU4578	1.97863e-05	0.000117622	0.000195152	0.00018607	0.000179674	2.72138e-05	0.000142854	0.000208247	0	0	0	0	0	0	0	0	k__Bacteria	p__Bacteroidetes	c__Sphingobacteriia	o__Sphingobacteriales	f__	g__	s__	222673		k__Bacteria;p__Bacteroidetes;c__Sphingobacteriia;o__Sphingobacteriales;f__;g__;s__
OTU2956	7.91452e-05	7.05733e-05	0.000151785	0.000155058	8.98372e-05	5.44277e-05	0.000214281	0.000138831	0	2.69027e-05	0	0	0	0	0	0	k__Bacteria	p__Bacteroidetes	c__Sphingobacteriia	o__Sphingobacteriales	f__	g__	s__	205609		k__Bacteria;p__Bacteroidetes;c__Sphingobacteriia;o__Sphingobacteriales;f__;g__;s__
OTU10142	0.000138504	0.000188195	0.000477037	3.10116e-05	2.24593e-05	0	7.14269e-05	0.00016197	0	0	0	0	0	0	0	0	k__Bacteria	p__Bacteroidetes	c__Sphingobacteriia	o__Sphingobacteriales	f__	g__	s__	113674		k__Bacteria;p__Bacteroidetes;c__Sphingobacteriia;o__Sphingobacteriales;f__;g__;s__
OTU2304	0	9.40977e-05	2.16835e-05	0.000124046	0.000471645	0	0.000119045	6.94155e-05	0	0	0	0	0	0	0	0	k__Bacteria	p__Bacteroidetes	c__Sphingobacteriia	o__Sphingobacteriales	f__Sphingobacteriaceae	g__	s__	1027121		k__Bacteria;p__Bacteroidetes;c__Sphingobacteriia;o__Sphingobacteriales;f__Sphingobacteriaceae;g__;s__
OTU5200	0.00037594	0.000376391	0.000498721	0.000279104	2.24593e-05	5.44277e-05	0.000166663	0.000185108	0	2.69027e-05	0	0	0	2.58545e-05	0	0	k__Bacteria	p__Chloroflexi	c__Anaerolineae	o__Caldilineales	f__Caldilineaceae	g__	s__	2470350		k__Bacteria;p__Chloroflexi;c__Anaerolineae;o__Caldilineales;f__Caldilineaceae;g__;s__
OTU21420	0	0	0.000130101	0.000124046	2.24593e-05	0.00035378	0.000142854	0.000347078	0	0	0	0	0	0	0	0	k__Bacteria	p__Chloroflexi	c__C0119	o__	f__	g__	s__	New.CleanUp.ReferenceOTU55043		k__Bacteria;p__Chloroflexi;c__C0119;o__;f__;g__;s__
OTU8430	1.97863e-05	0.000188195	0.000130101	3.10116e-05	6.73779e-05	0	4.76179e-05	4.6277e-05	0	0	0	0	0	0	0	0	k__Bacteria	p__Chloroflexi	c__Chloroflexi	o__[Roseiflexales]	f__[Kouleothrixaceae]	g__	s__	289530		k__Bacteria;p__Chloroflexi;c__Chloroflexi;o__[Roseiflexales];f__[Kouleothrixaceae];g__;s__
OTU8187	0.000652948	4.70489e-05	4.3367e-05	6.20232e-05	0	0	0	2.31385e-05	0	0	0	0	0	0	0	0	k__Bacteria	p__Chloroflexi	c__Chloroflexi	o__[Roseiflexales]	f__[Kouleothrixaceae]	g__	s__	225041		k__Bacteria;p__Chloroflexi;c__Chloroflexi;o__[Roseiflexales];f__[Kouleothrixaceae];g__;s__
OTU7587	0.00015829	0.000117622	8.6734e-05	0	8.98372e-05	2.72138e-05	0	0	0	0	0	0	0	0	0	0	k__Bacteria	p__Chloroflexi	c__Chloroflexi	o__[Roseiflexales]	f__[Kouleothrixaceae]	g__	s__	220353		k__Bacteria;p__Chloroflexi;c__Chloroflexi;o__[Roseiflexales];f__[Kouleothrixaceae];g__;s__
OTU10828	0.000237436	0.000141147	0.000498721	9.30348e-05	0	0	2.3809e-05	0.000208247	0	0	0	0	0	0	0	0	k__Bacteria	p__Chloroflexi	c__Chloroflexi	o__[Roseiflexales]	f__[Kouleothrixaceae]	g__	s__	217917		k__Bacteria;p__Chloroflexi;c__Chloroflexi;o__[Roseiflexales];f__[Kouleothrixaceae];g__;s__
OTU11634	0.000277008	0.000376391	0.000281886	6.20232e-05	0	0	0.000166663	0.000300801	0	0	0	0	0	0	0	0	k__Bacteria	p__Chloroflexi	c__Ellin6529	o__	f__	g__	s__	New.ReferenceOTU957		k__Bacteria;p__Chloroflexi;c__Ellin6529;o__;f__;g__;s__
OTU11766	0.000217649	0.000164671	0.000585455	0.000217081	4.49186e-05	0	0.000309516	0.000208247	2.63657e-05	0.000134513	6.55151e-05	0	0	0	2.4785e-05	1.83496e-05	k__Bacteria	p__Chloroflexi	c__Ellin6529	o__	f__	g__	s__	New.ReferenceOTU639		k__Bacteria;p__Chloroflexi;c__Ellin6529;o__;f__;g__;s__
OTU11694	0.00015829	4.70489e-05	0.000303569	9.30348e-05	0	5.44277e-05	0	0.000115693	0	0	0	0	0	0	0	0	k__Bacteria	p__Chloroflexi	c__Ellin6529	o__	f__	g__	s__	New.ReferenceOTU176		k__Bacteria;p__Chloroflexi;c__Ellin6529;o__;f__;g__;s__
OTU11926	0.00132568	9.40977e-05	0.000411987	3.10116e-05	0.000202134	2.72138e-05	0.000285707	0.000370216	0	0	0	0	0	0	0	0	k__Bacteria	p__Chloroflexi	c__Ellin6529	o__	f__	g__	s__	New.ReferenceOTU1171		k__Bacteria;p__Chloroflexi;c__Ellin6529;o__;f__;g__;s__
OTU64400	0.000138504	9.40977e-05	6.50505e-05	3.10116e-05	0	0	0	6.94155e-05	0	0	0	0	0	0	0	0	k__Bacteria	p__Chloroflexi	c__Ellin6529	o__	f__	g__	s__	New.CleanUp.ReferenceOTU327056		k__Bacteria;p__Chloroflexi;c__Ellin6529;o__;f__;g__;s__
OTU16596	0.000138504	2.35244e-05	4.3367e-05	3.10116e-05	0.000516564	0	0	2.31385e-05	0	0	0	0	0	0	0	0	k__Bacteria	p__Chloroflexi	c__Ellin6529	o__	f__	g__	s__	New.CleanUp.ReferenceOTU25275		k__Bacteria;p__Chloroflexi;c__Ellin6529;o__;f__;g__;s__
OTU10066	0.000435299	0.000117622	0.000346936	6.20232e-05	0	0	0	2.31385e-05	0	0	0	0	0	0	0	0	k__Bacteria	p__Chloroflexi	c__Ellin6529	o__	f__	g__	s__	4433512		k__Bacteria;p__Chloroflexi;c__Ellin6529;o__;f__;g__;s__
OTU2030	0.000316581	0.000188195	0.000238519	0	4.49186e-05	0.000408208	0.000357134	0.000994956	0	0	0	0	0	0	0	0	k__Bacteria	p__Chloroflexi	c__Ellin6529	o__	f__	g__	s__	4346961		k__Bacteria;p__Chloroflexi;c__Ellin6529;o__;f__;g__;s__
OTU4123	0.000573803	0.00134089	0.000975758	0.000403151	0.000381808	0.000625918	0.000785696	6.94155e-05	2.63657e-05	0	0	0	0	0	0	0	k__Bacteria	p__Chloroflexi	c__Ellin6529	o__	f__	g__	s__	849821		k__Bacteria;p__Chloroflexi;c__Ellin6529;o__;f__;g__;s__
OTU4003	7.91452e-05	0.000141147	0.000195152	0.000124046	0.000202134	0.000108855	0.000285707	0.000277662	0	0	0	0	0	0	2.4785e-05	0	k__Bacteria	p__Chloroflexi	c__Ellin6529	o__	f__	g__	s__	728344		k__Bacteria;p__Chloroflexi;c__Ellin6529;o__;f__;g__;s__
OTU5710	0.000336367	0.000258769	0.000390303	0.000124046	2.24593e-05	0	0.000119045	9.2554e-05	0	0	0	0	0	0	0	0	k__Bacteria	p__Chloroflexi	c__Ellin6529	o__	f__	g__	s__	366443		k__Bacteria;p__Chloroflexi;c__Ellin6529;o__;f__;g__;s__
OTU5904	0.000277008	0.000117622	0.000195152	9.30348e-05	0	2.72138e-05	0.000119045	0.000671017	0	0.000107611	4.36767e-05	0	0	0	0	5.50489e-05	k__Bacteria	p__Chloroflexi	c__Ellin6529	o__	f__	g__	s__	284171		k__Bacteria;p__Chloroflexi;c__Ellin6529;o__;f__;g__;s__
OTU6502	0.000296795	0.000305818	0.000498721	0.000124046	8.98372e-05	0.000925271	0.000547606	0.000717294	0	2.69027e-05	0	0	0	0	0	0	k__Bacteria	p__Chloroflexi	c__Ellin6529	o__	f__	g__	s__	217746		k__Bacteria;p__Chloroflexi;c__Ellin6529;o__;f__;g__;s__
OTU368	0.000138504	0.00021172	0.000498721	0.00018607	2.24593e-05	0.000299352	0.000571415	0.000347078	7.90972e-05	8.07081e-05	0.00013103	0.000125023	4.8329e-05	2.58545e-05	2.4785e-05	0.000201846	k__Bacteria	p__Chloroflexi	c__Ellin6529	o__	f__	g__	s__	212027		k__Bacteria;p__Chloroflexi;c__Ellin6529;o__;f__;g__;s__
OTU7331	7.91452e-05	0.000164671	4.3367e-05	3.10116e-05	6.73779e-05	0	7.14269e-05	6.94155e-05	0	0	0	0	0	0	0	0	k__Bacteria	p__Chloroflexi	c__Ellin6529	o__	f__	g__	s__	206963		k__Bacteria;p__Chloroflexi;c__Ellin6529;o__;f__;g__;s__
OTU2870	1.97863e-05	7.05733e-05	0.000238519	3.10116e-05	0	0.000326566	0.000523797	0.000370216	0	0.000134513	0	0	0	0	0	0	k__Bacteria	p__Chloroflexi	c__Ellin6529	o__	f__	g__	s__	206278		k__Bacteria;p__Chloroflexi;c__Ellin6529;o__;f__;g__;s__
OTU6823	0.000217649	9.40977e-05	0.000173468	9.30348e-05	4.49186e-05	0	2.3809e-05	0.00016197	0	0	0	0	0	0	0	0	k__Bacteria	p__Chloroflexi	c__Ellin6529	o__	f__	g__	s__	113054		k__Bacteria;p__Chloroflexi;c__Ellin6529;o__;f__;g__;s__
OTU3758	0.000969529	0.00969207	0.00594128	0.00220182	0.00222347	0.00166004	0.00385705	0.00557638	0	0.000564957	0	2.08372e-05	2.41645e-05	2.58545e-05	4.957e-05	0	k__Bacteria	p__Chloroflexi	c__Ellin6529	o__	f__	g__	s__	112867		k__Bacteria;p__Chloroflexi;c__Ellin6529;o__;f__;g__;s__
OTU4898	0.00037594	0.0010586	0.00199488	0.000527197	4.49186e-05	0.000217711	0.000428561	0.00127262	0	0	0	0	0	0	0	0	k__Bacteria	p__Chloroflexi	c__Ellin6529	o__	f__	g__	s__	82007		k__Bacteria;p__Chloroflexi;c__Ellin6529;o__;f__;g__;s__
OTU11578	0	0.000117622	2.16835e-05	0.00018607	0	0.000380994	0.000309516	0.000300801	0	0	0	0	0	0	0	0	k__Bacteria	p__Chloroflexi	c__Ktedonobacteria	o__JG30-KF-AS9	f__	g__	s__	New.ReferenceOTU571		k__Bacteria;p__Chloroflexi;c__Ktedonobacteria;o__JG30-KF-AS9;f__;g__;s__
OTU45478	1.97863e-05	0	0.000108418	9.30348e-05	0	0	7.14269e-05	0.000115693	0	0	0	0	0	0	0	0	k__Bacteria	p__Chloroflexi	c__Ktedonobacteria	o__JG30-KF-AS9	f__	g__	s__	New.CleanUp.ReferenceOTU208757		k__Bacteria;p__Chloroflexi;c__Ktedonobacteria;o__JG30-KF-AS9;f__;g__;s__
OTU4700	0	4.70489e-05	0.000563771	6.20232e-05	0	0.000190497	0.000309516	2.31385e-05	0	2.69027e-05	8.73534e-05	0	0	5.1709e-05	0	1.83496e-05	k__Bacteria	p__Chloroflexi	c__Ktedonobacteria	o__JG30-KF-AS9	f__	g__	s__	204816		k__Bacteria;p__Chloroflexi;c__Ktedonobacteria;o__JG30-KF-AS9;f__;g__;s__
OTU10002	0.000138504	2.35244e-05	0.000238519	9.30348e-05	0	0.000163283	0.000119045	4.6277e-05	0	0	0	0	0	0	0	0	k__Bacteria	p__Chloroflexi	c__Ktedonobacteria	o__JG30-KF-AS9	f__	g__	s__	111100		k__Bacteria;p__Chloroflexi;c__Ktedonobacteria;o__JG30-KF-AS9;f__;g__;s__
OTU11526	5.93589e-05	0.000117622	6.50505e-05	0.000558209	8.98372e-05	0.000625918	0.000499988	0.00108751	0	0	2.18384e-05	0	0	0	2.4785e-05	1.83496e-05	k__Bacteria	p__Chloroflexi	c__Ktedonobacteria	o__Ktedonobacterales	f__Ktedonobacteraceae	g__	s__	New.ReferenceOTU609		k__Bacteria;p__Chloroflexi;c__Ktedonobacteria;o__Ktedonobacterales;f__Ktedonobacteraceae;g__;s__
OTU16770	0	0	6.50505e-05	6.20232e-05	4.49186e-05	0.000136069	0	9.2554e-05	0	0	0	0	0	0	0	0	k__Bacteria	p__Chloroflexi	c__Ktedonobacteria	o__Ktedonobacterales	f__Ktedonobacteraceae	g__	s__	New.CleanUp.ReferenceOTU26445		k__Bacteria;p__Chloroflexi;c__Ktedonobacteria;o__Ktedonobacterales;f__Ktedonobacteraceae;g__;s__
OTU47093	0.00015829	0.000164671	6.50505e-05	0.00058922	2.24593e-05	0.000326566	0	0.000485909	0	0	0	0	0	0	0	0	k__Bacteria	p__Chloroflexi	c__Ktedonobacteria	o__Ktedonobacterales	f__Ktedonobacteraceae	g__	s__	New.CleanUp.ReferenceOTU218450		k__Bacteria;p__Chloroflexi;c__Ktedonobacteria;o__Ktedonobacterales;f__Ktedonobacteraceae;g__;s__
OTU10907	9.89315e-05	7.05733e-05	0.000715556	0.00077529	0.000404267	0.000190497	0.000666651	0.000647878	0	0	0	0	0	2.58545e-05	0	0	k__Bacteria	p__Chloroflexi	c__Ktedonobacteria	o__Ktedonobacterales	f__Ktedonobacteraceae	g__	s__	4306217		k__Bacteria;p__Chloroflexi;c__Ktedonobacteria;o__Ktedonobacterales;f__Ktedonobacteraceae;g__;s__
OTU11356	0	0.00129384	0	6.20232e-05	0.0026502	0.000843629	0.00104759	0.000185108	0	0	0	0	0	0	0	0	k__Bacteria	p__Chloroflexi	c__Ktedonobacteria	o__Ktedonobacterales	f__Ktedonobacteraceae	g__	s__	3117367		k__Bacteria;p__Chloroflexi;c__Ktedonobacteria;o__Ktedonobacterales;f__Ktedonobacteraceae;g__;s__
OTU12241	0	0.000164671	0	0	2.24593e-05	0.000244925	0.00069046	0.000370216	0	0	0	0	0	0	0	0	k__Bacteria	p__Chloroflexi	c__Ktedonobacteria	o__Thermogemmatisporales	f__Thermogemmatisporaceae	g__	s__	New.ReferenceOTU65		k__Bacteria;p__Chloroflexi;c__Ktedonobacteria;o__Thermogemmatisporales;f__Thermogemmatisporaceae;g__;s__
OTU48857	0	2.35244e-05	0	0	0.000336889	2.72138e-05	0.000190472	9.2554e-05	0	0	0	0	0	0	0	0	k__Bacteria	p__Chloroflexi	c__Ktedonobacteria	o__Thermogemmatisporales	f__Thermogemmatisporaceae	g__	s__	New.CleanUp.ReferenceOTU229300		k__Bacteria;p__Chloroflexi;c__Ktedonobacteria;o__Thermogemmatisporales;f__Thermogemmatisporaceae;g__;s__
OTU42288	0	9.40977e-05	0	0	0.000112296	0.000190497	2.3809e-05	2.31385e-05	0	0	0	0	0	0	0	0	k__Bacteria	p__Chloroflexi	c__Ktedonobacteria	o__Thermogemmatisporales	f__Thermogemmatisporaceae	g__	s__	New.CleanUp.ReferenceOTU189503		k__Bacteria;p__Chloroflexi;c__Ktedonobacteria;o__Thermogemmatisporales;f__Thermogemmatisporaceae;g__;s__
OTU14810	7.91452e-05	7.05733e-05	0	0.000124046	4.49186e-05	0.000136069	2.3809e-05	0	0	0	0	0	0	0	0	0	k__Bacteria	p__Chloroflexi	c__Ktedonobacteria	o__Thermogemmatisporales	f__Thermogemmatisporaceae	g__	s__	New.CleanUp.ReferenceOTU14765		k__Bacteria;p__Chloroflexi;c__Ktedonobacteria;o__Thermogemmatisporales;f__Thermogemmatisporaceae;g__;s__
OTU11440	0	0	2.16835e-05	0.000124046	0	0.000435422	0.000309516	6.94155e-05	0	0	0	0	0	0	0	0	k__Bacteria	p__Chloroflexi	c__Ktedonobacteria	o__Thermogemmatisporales	f__Thermogemmatisporaceae	g__	s__	285320		k__Bacteria;p__Chloroflexi;c__Ktedonobacteria;o__Thermogemmatisporales;f__Thermogemmatisporaceae;g__;s__
OTU8123	0	7.05733e-05	8.6734e-05	6.20232e-05	0.000134756	2.72138e-05	0.000333325	0.000323939	0	0	0	0	0	0	0	0	k__Bacteria	p__Chloroflexi	c__Ktedonobacteria	o__Thermogemmatisporales	f__Thermogemmatisporaceae	g__	s__	257685		k__Bacteria;p__Chloroflexi;c__Ktedonobacteria;o__Thermogemmatisporales;f__Thermogemmatisporaceae;g__;s__
OTU11509	0	0	8.6734e-05	9.30348e-05	0	0.000217711	0.000333325	0.00062474	0	0	0	0	0	0	0	0	k__Bacteria	p__Chloroflexi	c__Ktedonobacteria	o__Thermogemmatisporales	f__Thermogemmatisporaceae	g__	s__	222810		k__Bacteria;p__Chloroflexi;c__Ktedonobacteria;o__Thermogemmatisporales;f__Thermogemmatisporaceae;g__;s__
OTU249	5.93589e-05	9.40977e-05	0.000130101	3.10116e-05	8.98372e-05	0	7.14269e-05	0	0	0	0	0	0	0	0	0	k__Bacteria	p__Chloroflexi	c__S085	o__	f__	g__	s__	4444622		k__Bacteria;p__Chloroflexi;c__S085;o__;f__;g__;s__
OTU8231	1.97863e-05	4.70489e-05	0.000281886	0.000155058	0.000179674	0.000244925	0.000214281	0.000439632	0	0	0	2.08372e-05	0	0	0	1.83496e-05	k__Bacteria	p__Chloroflexi	c__S085	o__	f__	g__	s__	4299593		k__Bacteria;p__Chloroflexi;c__S085;o__;f__;g__;s__
OTU3312	5.93589e-05	0.000117622	0.000195152	3.10116e-05	0.000134756	0.000108855	0.000261899	6.94155e-05	0	8.07081e-05	4.36767e-05	0	0	2.58545e-05	0	0	k__Bacteria	p__Chloroflexi	c__S085	o__	f__	g__	s__	791214		k__Bacteria;p__Chloroflexi;c__S085;o__;f__;g__;s__
OTU3325	0.000257222	2.35244e-05	6.50505e-05	0.000155058	4.49186e-05	0	2.3809e-05	4.6277e-05	0	0	0	0	0	0	0	0	k__Bacteria	p__Chloroflexi	c__S085	o__	f__	g__	s__	571700		k__Bacteria;p__Chloroflexi;c__S085;o__;f__;g__;s__
OTU788	0	0	0.000173468	6.20232e-05	6.73779e-05	0	9.52358e-05	0.000115693	0	0	0	0	0	0	0	0	k__Bacteria	p__Chloroflexi	c__S085	o__	f__	g__	s__	568917		k__Bacteria;p__Chloroflexi;c__S085;o__;f__;g__;s__
OTU8737	3.95726e-05	9.40977e-05	4.3367e-05	0.000124046	2.24593e-05	2.72138e-05	4.76179e-05	0	0	0	0	0	0	0	0	1.83496e-05	k__Bacteria	p__Chloroflexi	c__Thermomicrobia	o__Ellin6537	f__	g__	s__	722416		k__Bacteria;p__Chloroflexi;c__Thermomicrobia;o__Ellin6537;f__;g__;s__
OTU66583	3.95726e-05	0	0.000108418	3.10116e-05	0	0	7.14269e-05	4.6277e-05	0	0	0	0	0	0	0	0	k__Bacteria	p__Chloroflexi	c__Thermomicrobia	o__JG30-KF-CM45	f__	g__	s__	New.CleanUp.ReferenceOTU341535		k__Bacteria;p__Chloroflexi;c__Thermomicrobia;o__JG30-KF-CM45;f__;g__;s__
OTU5083	0.000316581	0.000376391	0.000195152	9.30348e-05	0	0	0	2.31385e-05	0	0	0	0	0	0	0	0	k__Bacteria	p__Chloroflexi	c__Thermomicrobia	o__JG30-KF-CM45	f__	g__	s__	4452900		k__Bacteria;p__Chloroflexi;c__Thermomicrobia;o__JG30-KF-CM45;f__;g__;s__
OTU43750	1.97863e-05	2.35244e-05	4.3367e-05	3.10116e-05	4.49186e-05	5.44277e-05	0.000166663	0.00016197	0	0	0	0	0	0	0	1.83496e-05	k__Bacteria	p__Chloroflexi	c__TK10	o__AKYG885	f__Dolo_23	g__	s__	New.CleanUp.ReferenceOTU197786		k__Bacteria;p__Chloroflexi;c__TK10;o__AKYG885;f__Dolo_23;g__;s__
OTU7045	7.91452e-05	0.000352866	0.000195152	3.10116e-05	8.98372e-05	0	2.3809e-05	0.00016197	0	2.69027e-05	0	0	0	2.58545e-05	0	0	k__Bacteria	p__Chloroflexi	c__TK10	o__AKYG885	f__Dolo_23	g__	s__	223752		k__Bacteria;p__Chloroflexi;c__TK10;o__AKYG885;f__Dolo_23;g__;s__
OTU8074	0.000118718	0.000258769	0.000477037	0.000651244	0.000134756	0.000190497	9.52358e-05	0.000971817	0	0	2.18384e-05	0	0	0	0	0	k__Bacteria	p__Chloroflexi	c__TK10	o__B07_WMSP1	f__	g__	s__	4349212		k__Bacteria;p__Chloroflexi;c__TK10;o__B07_WMSP1;f__;g__;s__
OTU9907	0.000178077	0.000117622	8.6734e-05	0.000279104	2.24593e-05	0	2.3809e-05	0.00016197	0	0	0	0	0	0	0	0	k__Bacteria	p__Chloroflexi	c__TK10	o__B07_WMSP1	f__	g__	s__	99371		k__Bacteria;p__Chloroflexi;c__TK10;o__B07_WMSP1;f__;g__;s__
OTU12157	0	0	2.16835e-05	0.00018607	4.49186e-05	0.000136069	0.000285707	4.6277e-05	0	0	0	0	0	0	0	0	k__Bacteria	p__Chloroflexi	c__TK10	o__B07_WMSP1	f__FFCH4570	g__	s__	New.ReferenceOTU976		k__Bacteria;p__Chloroflexi;c__TK10;o__B07_WMSP1;f__FFCH4570;g__;s__
OTU11901	1.97863e-05	0	8.6734e-05	6.20232e-05	0	8.16415e-05	4.76179e-05	0.000185108	0	0	0	0	0	0	0	0	k__Bacteria	p__Chloroflexi	c__TK10	o__B07_WMSP1	f__FFCH4570	g__	s__	New.ReferenceOTU968		k__Bacteria;p__Chloroflexi;c__TK10;o__B07_WMSP1;f__FFCH4570;g__;s__
OTU66424	1.97863e-05	0	6.50505e-05	9.30348e-05	4.49186e-05	0.00035378	0.000190472	0.000323939	0	0	0	0	0	0	0	0	k__Bacteria	p__Chloroflexi	c__TK10	o__B07_WMSP1	f__FFCH4570	g__	s__	New.CleanUp.ReferenceOTU340394		k__Bacteria;p__Chloroflexi;c__TK10;o__B07_WMSP1;f__FFCH4570;g__;s__
OTU1941	0.000178077	2.35244e-05	4.3367e-05	0.000403151	0.000179674	0.000462635	0.000809505	0.000647878	2.63657e-05	0	0.000240222	4.16745e-05	0	7.75635e-05	9.914e-05	1.83496e-05	k__Bacteria	p__Chloroflexi	c__TK10	o__B07_WMSP1	f__FFCH4570	g__	s__	705844		k__Bacteria;p__Chloroflexi;c__TK10;o__B07_WMSP1;f__FFCH4570;g__;s__
OTU8084	1.97863e-05	4.70489e-05	0.000108418	9.30348e-05	0.000404267	0.000244925	0.000214281	0.000416493	0	0	0	0	0	0	0	0	k__Bacteria	p__Chloroflexi	c__TK10	o__B07_WMSP1	f__FFCH4570	g__	s__	325796		k__Bacteria;p__Chloroflexi;c__TK10;o__B07_WMSP1;f__FFCH4570;g__;s__
OTU2784	0.000336367	0.000305818	0.000498721	3.10116e-05	0	0	0	0.000416493	0	0	0	0	0	0	0	0	k__Bacteria	p__Chloroflexi	c__TK10	o__B07_WMSP1	f__FFCH4570	g__	s__	106297		k__Bacteria;p__Chloroflexi;c__TK10;o__B07_WMSP1;f__FFCH4570;g__;s__
OTU62183	5.93589e-05	2.35244e-05	8.6734e-05	0	2.24593e-05	5.44277e-05	0.000166663	2.31385e-05	0	2.69027e-05	4.36767e-05	0	0	5.1709e-05	0	3.66993e-05	k__Bacteria	p__Chloroflexi	c__TK17	o__	f__	g__	s__	New.CleanUp.ReferenceOTU312643		k__Bacteria;p__Chloroflexi;c__TK17;o__;f__;g__;s__
OTU7357	1.97863e-05	0	0.000108418	9.30348e-05	0	0.000326566	0.000357134	0.000254524	0	0	0	0	0	0	0	1.83496e-05	k__Bacteria	p__Chloroflexi	c__TK17	o__	f__	g__	s__	4441020		k__Bacteria;p__Chloroflexi;c__TK17;o__;f__;g__;s__
OTU2036	5.93589e-05	4.70489e-05	0.000108418	0	2.24593e-05	0	2.3809e-05	6.94155e-05	0	0	0	0	0	0	0	0	k__Bacteria	p__Chloroflexi	c__TK17	o__	f__	g__	s__	1118355		k__Bacteria;p__Chloroflexi;c__TK17;o__;f__;g__;s__
OTU8271	7.91452e-05	0.000141147	2.16835e-05	6.20232e-05	0	0	0	0.000138831	0	0	0	0	0	0	0	0	k__Bacteria	p__Chloroflexi	c__TK17	o__	f__	g__	s__	204757		k__Bacteria;p__Chloroflexi;c__TK17;o__;f__;g__;s__
OTU54980	1.97863e-05	9.40977e-05	0.000325253	0.000155058	0.000112296	8.16415e-05	0.000166663	0.000323939	0	5.38054e-05	0	0	0	0	0	3.66993e-05	k__Bacteria	p__Elusimicrobia	c__Elusimicrobia	o__FAC88	f__	g__	s__	New.CleanUp.ReferenceOTU267511		k__Bacteria;p__Elusimicrobia;c__Elusimicrobia;o__FAC88;f__;g__;s__
OTU10356	9.89315e-05	4.70489e-05	0.000130101	3.10116e-05	2.24593e-05	2.72138e-05	4.76179e-05	4.6277e-05	0	0	0	0	0	0	0	0	k__Bacteria	p__Elusimicrobia	c__Elusimicrobia	o__FAC88	f__	g__	s__	742822		k__Bacteria;p__Elusimicrobia;c__Elusimicrobia;o__FAC88;f__;g__;s__
OTU7779	0.000257222	7.05733e-05	0.000173468	0.000124046	2.24593e-05	2.72138e-05	0.000119045	0.00016197	0	0	2.18384e-05	0	0	0	0	0	k__Bacteria	p__Elusimicrobia	c__Elusimicrobia	o__FAC88	f__	g__	s__	357721		k__Bacteria;p__Elusimicrobia;c__Elusimicrobia;o__FAC88;f__;g__;s__
OTU8777	1.97863e-05	7.05733e-05	8.6734e-05	0.000124046	0.000157215	8.16415e-05	0.000166663	0.000115693	0	0	0	2.08372e-05	0	0	0	0	k__Bacteria	p__Elusimicrobia	c__Elusimicrobia	o__FAC88	f__	g__	s__	312378		k__Bacteria;p__Elusimicrobia;c__Elusimicrobia;o__FAC88;f__;g__;s__
OTU67565	1.97863e-05	2.35244e-05	0	3.10116e-05	8.98372e-05	0.000108855	0.000166663	6.94155e-05	0	2.69027e-05	0	0	0	0	0	0	k__Bacteria	p__Elusimicrobia	c__Elusimicrobia	o__IIb	f__	g__	s__	New.CleanUp.ReferenceOTU347833		k__Bacteria;p__Elusimicrobia;c__Elusimicrobia;o__IIb;f__;g__;s__
OTU44561	0.000118718	2.35244e-05	4.3367e-05	3.10116e-05	0	8.16415e-05	4.76179e-05	6.94155e-05	0	0	0	0	0	0	0	0	k__Bacteria	p__Elusimicrobia	c__Elusimicrobia	o__IIb	f__	g__	s__	New.CleanUp.ReferenceOTU202773		k__Bacteria;p__Elusimicrobia;c__Elusimicrobia;o__IIb;f__;g__;s__
OTU33936	0	0	4.3367e-05	9.30348e-05	4.49186e-05	0.000108855	9.52358e-05	0.000115693	0	0	0	0	0	0	0	0	k__Bacteria	p__Fibrobacteres	c__Fibrobacteria	o__258ds10	f__	g__	s__	New.CleanUp.ReferenceOTU136303		k__Bacteria;p__Fibrobacteres;c__Fibrobacteria;o__258ds10;f__;g__;s__
OTU3727	0.00015829	9.40977e-05	0.000151785	0.00018607	4.49186e-05	0	0	0.000208247	0	2.69027e-05	0	0	0	0	0	0	k__Bacteria	p__Firmicutes	c__Bacilli	o__Bacillales	f__	g__	s__	820668		k__Bacteria;p__Firmicutes;c__Bacilli;o__Bacillales;f__;g__;s__
OTU2388	0.000217649	0.000117622	0.000108418	0.000279104	4.49186e-05	2.72138e-05	0.000190472	0.000185108	2.63657e-05	2.69027e-05	0	0	0	2.58545e-05	0	0	k__Bacteria	p__Firmicutes	c__Bacilli	o__Bacillales	f__Bacillaceae	g__Bacillus	s__	4378332		k__Bacteria;p__Firmicutes;c__Bacilli;o__Bacillales;f__Bacillaceae;g__Bacillus;s__
OTU7074	5.93589e-05	4.70489e-05	0	0.000248093	2.24593e-05	5.44277e-05	7.14269e-05	0	0	2.69027e-05	0	0	0	0	0	0	k__Bacteria	p__Firmicutes	c__Bacilli	o__Bacillales	f__Bacillaceae	g__Bacillus	s__	2783438		k__Bacteria;p__Firmicutes;c__Bacilli;o__Bacillales;f__Bacillaceae;g__Bacillus;s__
OTU7798	3.95726e-05	0.000376391	4.3367e-05	0.00136451	0.000381808	8.16415e-05	0.000595224	0.000138831	0	2.69027e-05	2.18384e-05	0	4.8329e-05	0	0	0	k__Bacteria	p__Firmicutes	c__Bacilli	o__Bacillales	f__Bacillaceae	g__Bacillus	s__	2579228		k__Bacteria;p__Firmicutes;c__Bacilli;o__Bacillales;f__Bacillaceae;g__Bacillus;s__
OTU5561	0.000138504	0.000117622	0.000260202	6.20232e-05	8.98372e-05	5.44277e-05	0.000119045	6.94155e-05	2.63657e-05	2.69027e-05	0	0	0	5.1709e-05	0	0	k__Bacteria	p__Firmicutes	c__Bacilli	o__Bacillales	f__Bacillaceae	g__Bacillus	s__	1719246		k__Bacteria;p__Firmicutes;c__Bacilli;o__Bacillales;f__Bacillaceae;g__Bacillus;s__
OTU4647	0.00951721	0.000658684	0.0117525	0.00927247	0.00372824	0.000761988	0.00883312	0.00795965	0.000553681	0.00156036	0.000808019	0.000187535	0.00413213	0.00312839	0.00178452	0.00150467	k__Bacteria	p__Firmicutes	c__Bacilli	o__Bacillales	f__Bacillaceae	g__Bacillus	s__	898949		k__Bacteria;p__Firmicutes;c__Bacilli;o__Bacillales;f__Bacillaceae;g__Bacillus;s__
OTU3959	0.00108825	0.000776306	0.00125764	0.00151957	0.000426727	0.000761988	0.00138092	0.000671017	0.000131829	0.00029593	6.55151e-05	8.3349e-05	0.000434961	0.00023269	0.00019828	3.66993e-05	k__Bacteria	p__Firmicutes	c__Bacilli	o__Bacillales	f__Bacillaceae	g__Bacillus	s__	826250		k__Bacteria;p__Firmicutes;c__Bacilli;o__Bacillales;f__Bacillaceae;g__Bacillus;s__
OTU4610	3.95726e-05	2.35244e-05	6.50505e-05	0.000434162	0.000157215	0.000163283	0.000499988	0.000578463	2.63657e-05	2.69027e-05	0	0	0	2.58545e-05	2.4785e-05	3.66993e-05	k__Bacteria	p__Firmicutes	c__Bacilli	o__Bacillales	f__Bacillaceae	g__Bacillus	s__	823024		k__Bacteria;p__Firmicutes;c__Bacilli;o__Bacillales;f__Bacillaceae;g__Bacillus;s__
OTU5372	0	4.70489e-05	6.50505e-05	0.000279104	0	5.44277e-05	0.000261899	0.000185108	2.63657e-05	0	0	0	0	0	0	0	k__Bacteria	p__Firmicutes	c__Bacilli	o__Bacillales	f__Bacillaceae	g__Bacillus	s__	807693		k__Bacteria;p__Firmicutes;c__Bacilli;o__Bacillales;f__Bacillaceae;g__Bacillus;s__
OTU3878	0.0010091	0.00063516	0.00119259	0.0013335	6.73779e-05	0.000789202	0.00128568	0.00101809	0.000421852	0.000188319	4.36767e-05	4.16745e-05	9.6658e-05	0.000206836	7.4355e-05	0.000165147	k__Bacteria	p__Firmicutes	c__Bacilli	o__Bacillales	f__Bacillaceae	g__Bacillus	s__	154482		k__Bacteria;p__Firmicutes;c__Bacilli;o__Bacillales;f__Bacillaceae;g__Bacillus;s__
OTU5292	5.93589e-05	0.000117622	0.000411987	3.10116e-05	0.000134756	0	0	0	0	0	0	0	0	2.58545e-05	0	0	k__Bacteria	p__Firmicutes	c__Bacilli	o__Bacillales	f__Planococcaceae	g__	s__	1137325		k__Bacteria;p__Firmicutes;c__Bacilli;o__Bacillales;f__Planococcaceae;g__;s__
OTU6046	0.000217649	0.000164671	8.6734e-05	0.000124046	0.000134756	8.16415e-05	0.000166663	0	0	2.69027e-05	0	0	2.41645e-05	0.000103418	0	1.83496e-05	k__Bacteria	p__Firmicutes	c__Bacilli	o__Bacillales	f__Planococcaceae	g__	s__	256287		k__Bacteria;p__Firmicutes;c__Bacilli;o__Bacillales;f__Planococcaceae;g__;s__
OTU9947	0.000850811	0.000729257	0.000498721	0.00139552	4.49186e-05	0.000952485	0.000404752	0.00062474	0.000290023	8.07081e-05	6.55151e-05	8.3349e-05	2.41645e-05	0.000413672	9.914e-05	0.000165147	k__Bacteria	p__Firmicutes	c__Bacilli	o__Bacillales	f__Planococcaceae	g__Lysinibacillus	s__boronitolerans	2526440		k__Bacteria;p__Firmicutes;c__Bacilli;o__Bacillales;f__Planococcaceae;g__Lysinibacillus;s__boronitolerans
OTU2376	0.000356154	0.00021172	0.000260202	0.000372139	0.00031443	0.00035378	0.000523797	0.000254524	5.27315e-05	0.000161416	4.36767e-05	0.000104186	0.000217481	0.000155127	0.00019828	5.50489e-05	k__Bacteria	p__Firmicutes	c__Bacilli	o__Bacillales	f__Planococcaceae	g__Lysinibacillus	s__boronitolerans	821325		k__Bacteria;p__Firmicutes;c__Bacilli;o__Bacillales;f__Planococcaceae;g__Lysinibacillus;s__boronitolerans
OTU11401	0.000237436	7.05733e-05	2.16835e-05	0.000124046	0.000134756	0.000108855	7.14269e-05	6.94155e-05	0	2.69027e-05	0	0	2.41645e-05	2.58545e-05	0	3.66993e-05	k__Bacteria	p__Firmicutes	c__Bacilli	o__Bacillales	f__Planococcaceae	g__Solibacillus	s__	4438608		k__Bacteria;p__Firmicutes;c__Bacilli;o__Bacillales;f__Planococcaceae;g__Solibacillus;s__
OTU3384	0.000178077	0.000188195	0	3.10116e-05	0.000202134	0.000299352	2.3809e-05	6.94155e-05	0	0	6.55151e-05	0	0	0	0	9.17482e-05	k__Bacteria	p__Firmicutes	c__Clostridia	o__Clostridiales	f__Clostridiaceae	g__Caloramator	s__	917532		k__Bacteria;p__Firmicutes;c__Clostridia;o__Clostridiales;f__Clostridiaceae;g__Caloramator;s__
OTU11716	0.00146419	0.000846879	0.000130101	0.000341128	6.73779e-05	5.44277e-05	0.000285707	2.31385e-05	0	8.07081e-05	0	0	0	0	0	1.83496e-05	k__Bacteria	p__Gemmatimonadetes	c__Gemm-1	o__	f__	g__	s__	New.ReferenceOTU457		k__Bacteria;p__Gemmatimonadetes;c__Gemm-1;o__;f__;g__;s__
OTU10638	0.000652948	0.00042344	6.50505e-05	0.00018607	0	0	9.52358e-05	4.6277e-05	0	0	0	0	0	0	0	0	k__Bacteria	p__Gemmatimonadetes	c__Gemm-1	o__	f__	g__	s__	4350559		k__Bacteria;p__Gemmatimonadetes;c__Gemm-1;o__;f__;g__;s__
OTU7195	7.91452e-05	0.000164671	0.000130101	0.00018607	0	0	2.3809e-05	6.94155e-05	0	0	0	0	0	0	0	0	k__Bacteria	p__Gemmatimonadetes	c__Gemm-1	o__	f__	g__	s__	358590		k__Bacteria;p__Gemmatimonadetes;c__Gemm-1;o__;f__;g__;s__
OTU7660	0	9.40977e-05	0.000108418	3.10116e-05	2.24593e-05	0	7.14269e-05	0.000115693	0	0	0	0	0	0	0	0	k__Bacteria	p__Gemmatimonadetes	c__Gemm-1	o__	f__	g__	s__	314599		k__Bacteria;p__Gemmatimonadetes;c__Gemm-1;o__;f__;g__;s__
OTU890	5.93589e-05	9.40977e-05	2.16835e-05	3.10116e-05	6.73779e-05	0	7.14269e-05	2.31385e-05	0	0	0	0	0	0	0	0	k__Bacteria	p__Gemmatimonadetes	c__Gemm-1	o__	f__	g__	s__	249280		k__Bacteria;p__Gemmatimonadetes;c__Gemm-1;o__;f__;g__;s__
OTU1374	7.91452e-05	9.40977e-05	0.000195152	0.000465174	0.000134756	0	9.52358e-05	0.000370216	0	0	0	0	0	0	0	0	k__Bacteria	p__Gemmatimonadetes	c__Gemm-1	o__	f__	g__	s__	113224		k__Bacteria;p__Gemmatimonadetes;c__Gemm-1;o__;f__;g__;s__
OTU9878	0.000138504	2.35244e-05	2.16835e-05	6.20232e-05	2.24593e-05	5.44277e-05	4.76179e-05	4.6277e-05	0	0	0	0	0	0	0	0	k__Bacteria	p__Gemmatimonadetes	c__Gemm-2	o__	f__	g__	s__	1135012		k__Bacteria;p__Gemmatimonadetes;c__Gemm-2;o__;f__;g__;s__
OTU65078	0	4.70489e-05	2.16835e-05	6.20232e-05	6.73779e-05	5.44277e-05	7.14269e-05	4.6277e-05	0	0	0	0	0	0	0	0	k__Bacteria	p__Gemmatimonadetes	c__Gemm-5	o__	f__	g__	s__	New.CleanUp.ReferenceOTU331480		k__Bacteria;p__Gemmatimonadetes;c__Gemm-5;o__;f__;g__;s__
OTU58738	0.000554017	0.000517537	0.00114923	0.000558209	0	0	4.76179e-05	0.00016197	0	0	0	0	0	0	0	0	k__Bacteria	p__Gemmatimonadetes	c__Gemmatimonadetes	o__	f__	g__	s__	New.CleanUp.ReferenceOTU290715		k__Bacteria;p__Gemmatimonadetes;c__Gemmatimonadetes;o__;f__;g__;s__
OTU16323	0.000138504	0.000282293	0.000780606	9.30348e-05	0	0.000870843	7.14269e-05	0.00062474	0	0	0	0	0	0	0	0	k__Bacteria	p__Gemmatimonadetes	c__Gemmatimonadetes	o__	f__	g__	s__	New.CleanUp.ReferenceOTU23620		k__Bacteria;p__Gemmatimonadetes;c__Gemmatimonadetes;o__;f__;g__;s__
OTU35810	7.91452e-05	0	0.000281886	0.000372139	2.24593e-05	2.72138e-05	7.14269e-05	0.000416493	0	0	0	0	0	0	0	0	k__Bacteria	p__Gemmatimonadetes	c__Gemmatimonadetes	o__	f__	g__	s__	New.CleanUp.ReferenceOTU148444		k__Bacteria;p__Gemmatimonadetes;c__Gemmatimonadetes;o__;f__;g__;s__
OTU33574	1.97863e-05	4.70489e-05	0	3.10116e-05	0.000179674	0.000136069	0.000333325	9.2554e-05	0	0	0	0	0	0	0	0	k__Bacteria	p__Gemmatimonadetes	c__Gemmatimonadetes	o__	f__	g__	s__	New.CleanUp.ReferenceOTU133845		k__Bacteria;p__Gemmatimonadetes;c__Gemmatimonadetes;o__;f__;g__;s__
OTU10232	1.97863e-05	0	2.16835e-05	0.000155058	0.000202134	0.000462635	0.00069046	9.2554e-05	0	0	0	0	0	0	0	7.33985e-05	k__Bacteria	p__Gemmatimonadetes	c__Gemmatimonadetes	o__	f__	g__	s__	100478		k__Bacteria;p__Gemmatimonadetes;c__Gemmatimonadetes;o__;f__;g__;s__
OTU11594	0	9.40977e-05	0.000130101	0.000248093	2.24593e-05	0.000680346	0.000261899	0.00108751	0	0	2.18384e-05	0	0	0	0	0	k__Bacteria	p__Gemmatimonadetes	c__Gemmatimonadetes	o__Ellin5290	f__	g__	s__	New.ReferenceOTU788		k__Bacteria;p__Gemmatimonadetes;c__Gemmatimonadetes;o__Ellin5290;f__;g__;s__
OTU11995	0	4.70489e-05	0.000173468	0.000124046	4.49186e-05	5.44277e-05	9.52358e-05	0.000185108	0	0	0	0	0	0	0	0	k__Bacteria	p__Gemmatimonadetes	c__Gemmatimonadetes	o__Ellin5290	f__	g__	s__	New.ReferenceOTU527		k__Bacteria;p__Gemmatimonadetes;c__Gemmatimonadetes;o__Ellin5290;f__;g__;s__
OTU56553	0	7.05733e-05	0.000260202	6.20232e-05	0	0.000108855	7.14269e-05	2.31385e-05	0	0	0	0	0	0	0	0	k__Bacteria	p__Gemmatimonadetes	c__Gemmatimonadetes	o__Ellin5290	f__	g__	s__	New.CleanUp.ReferenceOTU277572		k__Bacteria;p__Gemmatimonadetes;c__Gemmatimonadetes;o__Ellin5290;f__;g__;s__
OTU38994	1.97863e-05	9.40977e-05	0.000975758	0.000372139	4.49186e-05	0.0019594	0.00116664	0.00016197	0	0	0	0	0	0	0	0	k__Bacteria	p__Gemmatimonadetes	c__Gemmatimonadetes	o__Ellin5290	f__	g__	s__	New.CleanUp.ReferenceOTU169756		k__Bacteria;p__Gemmatimonadetes;c__Gemmatimonadetes;o__Ellin5290;f__;g__;s__
OTU6957	0	0	0.000130101	0	0.000179674	8.16415e-05	0.000214281	0	0	5.38054e-05	0	0	0	0	0	0	k__Bacteria	p__Gemmatimonadetes	c__Gemmatimonadetes	o__Ellin5290	f__	g__	s__	4341346		k__Bacteria;p__Gemmatimonadetes;c__Gemmatimonadetes;o__Ellin5290;f__;g__;s__
OTU10391	0.00116739	0.00129384	0.00121428	0.00130249	0.00116788	0.000217711	0.000976167	0.000763571	0	2.69027e-05	2.18384e-05	0	0	0	0	3.66993e-05	k__Bacteria	p__Gemmatimonadetes	c__Gemmatimonadetes	o__Ellin5290	f__	g__	s__	4319210		k__Bacteria;p__Gemmatimonadetes;c__Gemmatimonadetes;o__Ellin5290;f__;g__;s__
OTU578	0.000652948	0.000776306	0.000411987	0.000434162	0.000112296	0.000108855	0.000214281	9.2554e-05	0	2.69027e-05	0	0	0	2.58545e-05	0	0	k__Bacteria	p__Gemmatimonadetes	c__Gemmatimonadetes	o__Ellin5290	f__	g__	s__	511514		k__Bacteria;p__Gemmatimonadetes;c__Gemmatimonadetes;o__Ellin5290;f__;g__;s__
OTU13953	0.000277008	0.000164671	4.3367e-05	0.000527197	0.00031443	2.72138e-05	0.000333325	0.000439632	0	0	0	0	0	2.58545e-05	0	0	k__Bacteria	p__Gemmatimonadetes	c__Gemmatimonadetes	o__Gemmatimonadales	f__Ellin5301	g__	s__	New.CleanUp.ReferenceOTU9463		k__Bacteria;p__Gemmatimonadetes;c__Gemmatimonadetes;o__Gemmatimonadales;f__Ellin5301;g__;s__
OTU54826	0.000277008	0.000376391	0.000455354	0.000403151	0.000269512	5.44277e-05	7.14269e-05	0.000277662	0	0	2.18384e-05	0	0	0	0	1.83496e-05	k__Bacteria	p__Gemmatimonadetes	c__Gemmatimonadetes	o__Gemmatimonadales	f__Ellin5301	g__	s__	New.CleanUp.ReferenceOTU266579		k__Bacteria;p__Gemmatimonadetes;c__Gemmatimonadetes;o__Gemmatimonadales;f__Ellin5301;g__;s__
OTU6943	0.000296795	0.00108212	0.00036862	0.000558209	8.98372e-05	0	0.000380943	0.000185108	0	0	0	0	0	0	0	0	k__Bacteria	p__Gemmatimonadetes	c__Gemmatimonadetes	o__Gemmatimonadales	f__Ellin5301	g__	s__	114413		k__Bacteria;p__Gemmatimonadetes;c__Gemmatimonadetes;o__Gemmatimonadales;f__Ellin5301;g__;s__
OTU7334	5.93589e-05	7.05733e-05	2.16835e-05	9.30348e-05	0	2.72138e-05	7.14269e-05	0	0	0	0	0	0	0	0	0	k__Bacteria	p__Gemmatimonadetes	c__Gemmatimonadetes	o__Gemmatimonadales	f__Ellin5301	g__	s__	114389		k__Bacteria;p__Gemmatimonadetes;c__Gemmatimonadetes;o__Gemmatimonadales;f__Ellin5301;g__;s__
OTU3825	1.97863e-05	0	4.3367e-05	0.000341128	4.49186e-05	2.72138e-05	9.52358e-05	0.000115693	0	0	0	0	0	0	0	0	k__Bacteria	p__Gemmatimonadetes	c__Gemmatimonadetes	o__Gemmatimonadales	f__Ellin5301	g__	s__	111748		k__Bacteria;p__Gemmatimonadetes;c__Gemmatimonadetes;o__Gemmatimonadales;f__Ellin5301;g__;s__
OTU11710	0.000336367	0.000117622	4.3367e-05	0	8.98372e-05	8.16415e-05	0.000142854	6.94155e-05	0	0	6.55151e-05	0	0	0	0	0	k__Bacteria	p__Gemmatimonadetes	c__Gemmatimonadetes	o__N1423WL	f__	g__	s__	New.ReferenceOTU198		k__Bacteria;p__Gemmatimonadetes;c__Gemmatimonadetes;o__N1423WL;f__;g__;s__
OTU5908	3.95726e-05	0.000164671	0.000411987	0.000155058	2.24593e-05	0.000136069	4.76179e-05	0.00016197	0	0	0	0	0	0	0	0	k__Bacteria	p__Nitrospirae	c__Nitrospira	o__Nitrospirales	f__[Leptospirillaceae]	g__	s__	210132		k__Bacteria;p__Nitrospirae;c__Nitrospira;o__Nitrospirales;f__[Leptospirillaceae];g__;s__
OTU1285	0.000831025	0.000305818	2.16835e-05	0	0	0	2.3809e-05	6.94155e-05	0	0	0	0	0	0	0	0	k__Bacteria	p__Nitrospirae	c__Nitrospira	o__Nitrospirales	f__0319-6A21	g__	s__	328957		k__Bacteria;p__Nitrospirae;c__Nitrospira;o__Nitrospirales;f__0319-6A21;g__;s__
OTU10140	0.00779581	0.0092451	0.000325253	0.00117844	2.24593e-05	0	7.14269e-05	0.000115693	2.63657e-05	0	0	0	0	0	0	0	k__Bacteria	p__Nitrospirae	c__Nitrospira	o__Nitrospirales	f__0319-6A21	g__	s__	136286		k__Bacteria;p__Nitrospirae;c__Nitrospira;o__Nitrospirales;f__0319-6A21;g__;s__
OTU11888	1.97863e-05	0.000823355	0.000108418	0.000155058	4.49186e-05	0.000190497	7.14269e-05	2.31385e-05	0	0	0	0	0	0	0	0	k__Bacteria	p__Nitrospirae	c__Nitrospira	o__Nitrospirales	f__FW	g__4-29	s__	New.ReferenceOTU803		k__Bacteria;p__Nitrospirae;c__Nitrospira;o__Nitrospirales;f__FW;g__4-29;s__
OTU4052	1.97863e-05	0	0.000672189	0.00018607	0	0.000108855	2.3809e-05	0.000138831	0	0	0	0	0	0	0	0	k__Bacteria	p__Nitrospirae	c__Nitrospira	o__Nitrospirales	f__Nitrospiraceae	g__Nitrospira	s__	4419835		k__Bacteria;p__Nitrospirae;c__Nitrospira;o__Nitrospirales;f__Nitrospiraceae;g__Nitrospira;s__
OTU10447	0.000672734	0.00021172	0.00182141	3.10116e-05	0	5.44277e-05	0.000190472	0.00118006	0	5.38054e-05	0	0	0	0	0	0	k__Bacteria	p__Nitrospirae	c__Nitrospira	o__Nitrospirales	f__Nitrospiraceae	g__Nitrospira	s__	4360284		k__Bacteria;p__Nitrospirae;c__Nitrospira;o__Nitrospirales;f__Nitrospiraceae;g__Nitrospira;s__
OTU10342	0.00037594	4.70489e-05	0.000607138	0.00018607	0	0	0	2.31385e-05	0	0	0	0	0	0	0	0	k__Bacteria	p__Nitrospirae	c__Nitrospira	o__Nitrospirales	f__Nitrospiraceae	g__Nitrospira	s__	537655		k__Bacteria;p__Nitrospirae;c__Nitrospira;o__Nitrospirales;f__Nitrospiraceae;g__Nitrospira;s__
OTU6519	0.000316581	0.00042344	0.000260202	3.10116e-05	0	0	0	2.31385e-05	0	0	0	0	0	0	0	0	k__Bacteria	p__Planctomycetes	c__	o__	f__	g__	s__	527968		k__Bacteria;p__Planctomycetes;c__;o__;f__;g__;s__
OTU59453	1.97863e-05	4.70489e-05	0.000238519	3.10116e-05	0	0	7.14269e-05	2.31385e-05	0	0	0	0	0	0	0	0	k__Bacteria	p__Planctomycetes	c__028H05-P-BN-P5	o__	f__	g__	s__	New.CleanUp.ReferenceOTU295376		k__Bacteria;p__Planctomycetes;c__028H05-P-BN-P5;o__;f__;g__;s__
OTU17365	7.91452e-05	0.000117622	0.000108418	3.10116e-05	0	0	0	0.000347078	0	0	0	0	0	0	0	0	k__Bacteria	p__Planctomycetes	c__C6	o__d113	f__	g__	s__	New.CleanUp.ReferenceOTU30083		k__Bacteria;p__Planctomycetes;c__C6;o__d113;f__;g__;s__
OTU11774	0	0.000164671	0.000238519	0	4.49186e-05	2.72138e-05	0	0.000138831	0	0	0	0	0	0	0	0	k__Bacteria	p__Planctomycetes	c__C6	o__MVS-107	f__	g__	s__	New.ReferenceOTU631		k__Bacteria;p__Planctomycetes;c__C6;o__MVS-107;f__;g__;s__
OTU17520	7.91452e-05	9.40977e-05	8.6734e-05	6.20232e-05	0.000112296	8.16415e-05	0.000166663	2.31385e-05	0	0	0	0	0	0	0	0	k__Bacteria	p__Planctomycetes	c__OM190	o__agg27	f__	g__	s__	New.CleanUp.ReferenceOTU31006		k__Bacteria;p__Planctomycetes;c__OM190;o__agg27;f__;g__;s__
OTU1955	1.97863e-05	0.000141147	8.6734e-05	9.30348e-05	2.24593e-05	0	0	2.31385e-05	0	0	0	0	0	0	0	0	k__Bacteria	p__Planctomycetes	c__OM190	o__agg27	f__	g__	s__	4437180		k__Bacteria;p__Planctomycetes;c__OM190;o__agg27;f__;g__;s__
OTU67889	9.89315e-05	4.70489e-05	0.000151785	0.00018607	0	0	2.3809e-05	2.31385e-05	0	0	0	0	0	0	0	0	k__Bacteria	p__Planctomycetes	c__OM190	o__CL500-15	f__	g__	s__	New.CleanUp.ReferenceOTU350194		k__Bacteria;p__Planctomycetes;c__OM190;o__CL500-15;f__;g__;s__
OTU12311	0	0.000117622	8.6734e-05	0.000124046	4.49186e-05	0.000244925	0.000380943	4.6277e-05	0	0	8.73534e-05	0	0	0	0	0	k__Bacteria	p__Planctomycetes	c__Phycisphaerae	o__CPla-3	f__	g__	s__	New.ReferenceOTU89		k__Bacteria;p__Planctomycetes;c__Phycisphaerae;o__CPla-3;f__;g__;s__
OTU11859	5.93589e-05	9.40977e-05	0.000693872	6.20232e-05	0.000134756	0.000244925	0.000190472	2.31385e-05	0	2.69027e-05	2.18384e-05	0	0	0	0	0	k__Bacteria	p__Planctomycetes	c__Phycisphaerae	o__CPla-3	f__	g__	s__	New.ReferenceOTU35		k__Bacteria;p__Planctomycetes;c__Phycisphaerae;o__CPla-3;f__;g__;s__
OTU54286	1.97863e-05	9.40977e-05	4.3367e-05	0.00018607	6.73779e-05	0.000217711	0.000119045	6.94155e-05	0	2.69027e-05	0	2.08372e-05	4.8329e-05	0	7.4355e-05	0	k__Bacteria	p__Planctomycetes	c__Phycisphaerae	o__CPla-3	f__	g__	s__	New.CleanUp.ReferenceOTU262945		k__Bacteria;p__Planctomycetes;c__Phycisphaerae;o__CPla-3;f__;g__;s__
OTU48847	7.91452e-05	0.00042344	0.000260202	0.000496186	0.000134756	0.000136069	0.000142854	0.000370216	0	2.69027e-05	0	0	0	0	0	3.66993e-05	k__Bacteria	p__Planctomycetes	c__Phycisphaerae	o__CPla-3	f__	g__	s__	New.CleanUp.ReferenceOTU229259		k__Bacteria;p__Planctomycetes;c__Phycisphaerae;o__CPla-3;f__;g__;s__
OTU42913	9.89315e-05	4.70489e-05	0.000151785	3.10116e-05	2.24593e-05	8.16415e-05	0.000166663	0.000185108	0	2.69027e-05	0	0	0	0	0	0	k__Bacteria	p__Planctomycetes	c__Phycisphaerae	o__CPla-3	f__	g__	s__	New.CleanUp.ReferenceOTU193150		k__Bacteria;p__Planctomycetes;c__Phycisphaerae;o__CPla-3;f__;g__;s__
OTU31532	0.000138504	0.000282293	6.50505e-05	0.00018607	8.98372e-05	0.000190497	7.14269e-05	0.000208247	0	0	4.36767e-05	0	0	0	0	0	k__Bacteria	p__Planctomycetes	c__Phycisphaerae	o__CPla-3	f__	g__	s__	New.CleanUp.ReferenceOTU120214		k__Bacteria;p__Planctomycetes;c__Phycisphaerae;o__CPla-3;f__;g__;s__
OTU10161	3.95726e-05	0	2.16835e-05	6.20232e-05	6.73779e-05	0.000517063	0.000190472	0.00016197	2.63657e-05	0	4.36767e-05	0	0	0	0	5.50489e-05	k__Bacteria	p__Planctomycetes	c__Phycisphaerae	o__CPla-3	f__	g__	s__	278983		k__Bacteria;p__Planctomycetes;c__Phycisphaerae;o__CPla-3;f__;g__;s__
OTU11796	0.000237436	9.40977e-05	2.16835e-05	9.30348e-05	0	0	2.3809e-05	0	0	0	0	0	0	0	0	0	k__Bacteria	p__Planctomycetes	c__Phycisphaerae	o__Phycisphaerales	f__	g__	s__	New.ReferenceOTU1138		k__Bacteria;p__Planctomycetes;c__Phycisphaerae;o__Phycisphaerales;f__;g__;s__
OTU13851	5.93589e-05	9.40977e-05	0.000130101	0.000217081	4.49186e-05	0	4.76179e-05	0.000254524	0	0	0	0	0	0	0	0	k__Bacteria	p__Planctomycetes	c__Phycisphaerae	o__Phycisphaerales	f__	g__	s__	New.CleanUp.ReferenceOTU8790		k__Bacteria;p__Planctomycetes;c__Phycisphaerae;o__Phycisphaerales;f__;g__;s__
OTU63053	0	0	4.3367e-05	0.000155058	0	2.72138e-05	7.14269e-05	0.000115693	0	0	0	0	0	0	0	0	k__Bacteria	p__Planctomycetes	c__Phycisphaerae	o__Phycisphaerales	f__	g__	s__	New.CleanUp.ReferenceOTU318180		k__Bacteria;p__Planctomycetes;c__Phycisphaerae;o__Phycisphaerales;f__;g__;s__
OTU6353	9.89315e-05	2.35244e-05	8.6734e-05	9.30348e-05	2.24593e-05	2.72138e-05	9.52358e-05	9.2554e-05	0	0	0	0	0	0	0	0	k__Bacteria	p__Planctomycetes	c__Phycisphaerae	o__Phycisphaerales	f__	g__	s__	241823		k__Bacteria;p__Planctomycetes;c__Phycisphaerae;o__Phycisphaerales;f__;g__;s__
OTU12186	5.93589e-05	0.000117622	0.000151785	0.00018607	4.49186e-05	0	7.14269e-05	6.94155e-05	0	0	0	0	0	0	0	0	k__Bacteria	p__Planctomycetes	c__Phycisphaerae	o__Pla1	f__	g__	s__	New.ReferenceOTU752		k__Bacteria;p__Planctomycetes;c__Phycisphaerae;o__Pla1;f__;g__;s__
OTU12307	1.97863e-05	2.35244e-05	2.16835e-05	9.30348e-05	6.73779e-05	0.00130626	0.000785696	0.000138831	5.27315e-05	2.69027e-05	4.36767e-05	0.000145861	0.000120823	7.75635e-05	2.4785e-05	5.50489e-05	k__Bacteria	p__Planctomycetes	c__Phycisphaerae	o__WD2101	f__	g__	s__	New.ReferenceOTU85		k__Bacteria;p__Planctomycetes;c__Phycisphaerae;o__WD2101;f__;g__;s__
OTU11672	1.97863e-05	4.70489e-05	0.000151785	0.00018607	0.000651319	0.000136069	0.000357134	0.000277662	0	8.07081e-05	2.18384e-05	0	2.41645e-05	5.1709e-05	2.4785e-05	1.83496e-05	k__Bacteria	p__Planctomycetes	c__Phycisphaerae	o__WD2101	f__	g__	s__	New.ReferenceOTU674		k__Bacteria;p__Planctomycetes;c__Phycisphaerae;o__WD2101;f__;g__;s__
OTU11675	5.93589e-05	4.70489e-05	4.3367e-05	0.000124046	8.98372e-05	5.44277e-05	2.3809e-05	0.000254524	0	0	0	0	0	0	0	0	k__Bacteria	p__Planctomycetes	c__Phycisphaerae	o__WD2101	f__	g__	s__	New.ReferenceOTU670		k__Bacteria;p__Planctomycetes;c__Phycisphaerae;o__WD2101;f__;g__;s__
OTU11679	0.000316581	0.000188195	8.6734e-05	0	0.000134756	0.000244925	0.000166663	0.000115693	0	0	0	0	0	0	0	0	k__Bacteria	p__Planctomycetes	c__Phycisphaerae	o__WD2101	f__	g__	s__	New.ReferenceOTU615		k__Bacteria;p__Planctomycetes;c__Phycisphaerae;o__WD2101;f__;g__;s__
OTU11943	0	0	6.50505e-05	3.10116e-05	0.000179674	5.44277e-05	0.000142854	9.2554e-05	0	0	0	0	0	0	0	0	k__Bacteria	p__Planctomycetes	c__Phycisphaerae	o__WD2101	f__	g__	s__	New.ReferenceOTU595		k__Bacteria;p__Planctomycetes;c__Phycisphaerae;o__WD2101;f__;g__;s__
OTU11982	0.000118718	2.35244e-05	0.000195152	0.000124046	0.000179674	5.44277e-05	0.000214281	0.00016197	0	5.38054e-05	0	0	0	2.58545e-05	2.4785e-05	1.83496e-05	k__Bacteria	p__Planctomycetes	c__Phycisphaerae	o__WD2101	f__	g__	s__	New.ReferenceOTU442		k__Bacteria;p__Planctomycetes;c__Phycisphaerae;o__WD2101;f__;g__;s__
OTU11963	0.000316581	0.000282293	0.00036862	0.000713267	0.00062886	0.000163283	0.000119045	2.31385e-05	0	5.38054e-05	0	0	0	0	0	0	k__Bacteria	p__Planctomycetes	c__Phycisphaerae	o__WD2101	f__	g__	s__	New.ReferenceOTU346		k__Bacteria;p__Planctomycetes;c__Phycisphaerae;o__WD2101;f__;g__;s__
OTU11857	0.000494658	0.00021172	0.000130101	0.000806302	0.000359349	0.000299352	0.000523797	0.000832986	0	0	0	0	0	0	0	0	k__Bacteria	p__Planctomycetes	c__Phycisphaerae	o__WD2101	f__	g__	s__	New.ReferenceOTU195		k__Bacteria;p__Planctomycetes;c__Phycisphaerae;o__WD2101;f__;g__;s__
OTU11707	0.000138504	2.35244e-05	0.00080229	0.000341128	0.000291971	0	0.000404752	0.000809848	0	0	0	0	0	0	0	0	k__Bacteria	p__Planctomycetes	c__Phycisphaerae	o__WD2101	f__	g__	s__	New.ReferenceOTU194		k__Bacteria;p__Planctomycetes;c__Phycisphaerae;o__WD2101;f__;g__;s__
OTU11848	1.97863e-05	2.35244e-05	8.6734e-05	0.00018607	0.000291971	8.16415e-05	0.000404752	0.000300801	0	0	0	0	0	0	0	0	k__Bacteria	p__Planctomycetes	c__Phycisphaerae	o__WD2101	f__	g__	s__	New.ReferenceOTU145		k__Bacteria;p__Planctomycetes;c__Phycisphaerae;o__WD2101;f__;g__;s__
OTU11692	0.000336367	2.35244e-05	0.000151785	0.000155058	2.24593e-05	0	4.76179e-05	0.000208247	0	0	0	0	0	0	0	0	k__Bacteria	p__Planctomycetes	c__Phycisphaerae	o__WD2101	f__	g__	s__	New.ReferenceOTU144		k__Bacteria;p__Planctomycetes;c__Phycisphaerae;o__WD2101;f__;g__;s__
OTU12191	0.000138504	7.05733e-05	8.6734e-05	0.00127148	0.000247052	0	7.14269e-05	0.00101809	0	0	0	0	0	0	0	0	k__Bacteria	p__Planctomycetes	c__Phycisphaerae	o__WD2101	f__	g__	s__	New.ReferenceOTU1161		k__Bacteria;p__Planctomycetes;c__Phycisphaerae;o__WD2101;f__;g__;s__
OTU11534	7.91452e-05	0.000541062	0.001713	0.0013335	0.00363841	0.00397322	0.00457132	2.31385e-05	2.63657e-05	8.07081e-05	4.36767e-05	2.08372e-05	0	0	4.957e-05	9.17482e-05	k__Bacteria	p__Planctomycetes	c__Phycisphaerae	o__WD2101	f__	g__	s__	New.ReferenceOTU1153		k__Bacteria;p__Planctomycetes;c__Phycisphaerae;o__WD2101;f__;g__;s__
OTU11797	0.00116739	0.00265826	0.00080229	0.00555108	0.000786075	0	2.3809e-05	0.00113379	0	0	0	0	0	0	0	0	k__Bacteria	p__Planctomycetes	c__Phycisphaerae	o__WD2101	f__	g__	s__	New.ReferenceOTU1139		k__Bacteria;p__Planctomycetes;c__Phycisphaerae;o__WD2101;f__;g__;s__
OTU11735	0.000415512	0.000776306	0.000889024	0.002667	0.00220101	0.00035378	0.000785696	0.00270721	0	0	0	0	0	0	0	0	k__Bacteria	p__Planctomycetes	c__Phycisphaerae	o__WD2101	f__	g__	s__	New.ReferenceOTU1081		k__Bacteria;p__Planctomycetes;c__Phycisphaerae;o__WD2101;f__;g__;s__
OTU28244	5.93589e-05	2.35244e-05	0.000303569	6.20232e-05	0	0	0.000166663	0.000138831	0	0	2.18384e-05	0	0	0	0	0	k__Bacteria	p__Planctomycetes	c__Phycisphaerae	o__WD2101	f__	g__	s__	New.CleanUp.ReferenceOTU99030		k__Bacteria;p__Planctomycetes;c__Phycisphaerae;o__WD2101;f__;g__;s__
OTU26982	1.97863e-05	0	4.3367e-05	6.20232e-05	4.49186e-05	0	2.3809e-05	6.94155e-05	0	0	0	0	0	0	0	0	k__Bacteria	p__Planctomycetes	c__Phycisphaerae	o__WD2101	f__	g__	s__	New.CleanUp.ReferenceOTU90666		k__Bacteria;p__Planctomycetes;c__Phycisphaerae;o__WD2101;f__;g__;s__
OTU21561	0.000237436	7.05733e-05	0.000737239	0.000124046	2.24593e-05	0	0.000119045	0.000115693	0	0	0	0	0	0	0	0	k__Bacteria	p__Planctomycetes	c__Phycisphaerae	o__WD2101	f__	g__	s__	New.CleanUp.ReferenceOTU55902		k__Bacteria;p__Planctomycetes;c__Phycisphaerae;o__WD2101;f__;g__;s__
OTU21108	0	0	2.16835e-05	3.10116e-05	0.000291971	5.44277e-05	0.000142854	0.000115693	0	0	0	0	0	0	0	1.83496e-05	k__Bacteria	p__Planctomycetes	c__Phycisphaerae	o__WD2101	f__	g__	s__	New.CleanUp.ReferenceOTU53210		k__Bacteria;p__Planctomycetes;c__Phycisphaerae;o__WD2101;f__;g__;s__
OTU19919	7.91452e-05	2.35244e-05	0.000108418	0.00018607	0	0	0	6.94155e-05	0	0	0	0	0	0	0	0	k__Bacteria	p__Planctomycetes	c__Phycisphaerae	o__WD2101	f__	g__	s__	New.CleanUp.ReferenceOTU45826		k__Bacteria;p__Planctomycetes;c__Phycisphaerae;o__WD2101;f__;g__;s__
OTU18749	0.000929956	7.05733e-05	0.000520404	9.30348e-05	2.24593e-05	0	0	0.000208247	0	0	0	0	0	0	0	0	k__Bacteria	p__Planctomycetes	c__Phycisphaerae	o__WD2101	f__	g__	s__	New.CleanUp.ReferenceOTU38555		k__Bacteria;p__Planctomycetes;c__Phycisphaerae;o__WD2101;f__;g__;s__
OTU66523	1.97863e-05	4.70489e-05	4.3367e-05	0.000124046	2.24593e-05	0	0.000119045	0.00016197	0	0	0	0	0	0	0	0	k__Bacteria	p__Planctomycetes	c__Phycisphaerae	o__WD2101	f__	g__	s__	New.CleanUp.ReferenceOTU341022		k__Bacteria;p__Planctomycetes;c__Phycisphaerae;o__WD2101;f__;g__;s__
OTU66054	1.97863e-05	0	0.000151785	0.000341128	2.24593e-05	0	4.76179e-05	0.000254524	0	0	0	0	0	0	0	0	k__Bacteria	p__Planctomycetes	c__Phycisphaerae	o__WD2101	f__	g__	s__	New.CleanUp.ReferenceOTU337815		k__Bacteria;p__Planctomycetes;c__Phycisphaerae;o__WD2101;f__;g__;s__
OTU61683	0	9.40977e-05	8.6734e-05	0	6.73779e-05	0	2.3809e-05	0.000254524	0	0	0	0	0	0	0	0	k__Bacteria	p__Planctomycetes	c__Phycisphaerae	o__WD2101	f__	g__	s__	New.CleanUp.ReferenceOTU309468		k__Bacteria;p__Planctomycetes;c__Phycisphaerae;o__WD2101;f__;g__;s__
OTU60054	1.97863e-05	0	0.000173468	0.000155058	8.98372e-05	0	7.14269e-05	9.2554e-05	0	0	0	0	0	0	0	0	k__Bacteria	p__Planctomycetes	c__Phycisphaerae	o__WD2101	f__	g__	s__	New.CleanUp.ReferenceOTU299177		k__Bacteria;p__Planctomycetes;c__Phycisphaerae;o__WD2101;f__;g__;s__
OTU53869	3.95726e-05	0	6.50505e-05	9.30348e-05	0.000112296	2.72138e-05	2.3809e-05	9.2554e-05	0	0	0	0	2.41645e-05	2.58545e-05	0	1.83496e-05	k__Bacteria	p__Planctomycetes	c__Phycisphaerae	o__WD2101	f__	g__	s__	New.CleanUp.ReferenceOTU260243		k__Bacteria;p__Planctomycetes;c__Phycisphaerae;o__WD2101;f__;g__;s__
OTU52176	1.97863e-05	0.00042344	0.000303569	0.000558209	0.000179674	0	0.000119045	0.000786709	0	0	0	0	0	0	0	0	k__Bacteria	p__Planctomycetes	c__Phycisphaerae	o__WD2101	f__	g__	s__	New.CleanUp.ReferenceOTU249804		k__Bacteria;p__Planctomycetes;c__Phycisphaerae;o__WD2101;f__;g__;s__
OTU49367	0.000949743	2.35244e-05	4.3367e-05	0.000155058	0	0	0	4.6277e-05	0	0	0	0	0	0	0	0	k__Bacteria	p__Planctomycetes	c__Phycisphaerae	o__WD2101	f__	g__	s__	New.CleanUp.ReferenceOTU232525		k__Bacteria;p__Planctomycetes;c__Phycisphaerae;o__WD2101;f__;g__;s__
OTU41122	3.95726e-05	2.35244e-05	0.000325253	0.000124046	4.49186e-05	2.72138e-05	0.000309516	6.94155e-05	0	0	0	0	0	0	0	0	k__Bacteria	p__Planctomycetes	c__Phycisphaerae	o__WD2101	f__	g__	s__	New.CleanUp.ReferenceOTU182321		k__Bacteria;p__Planctomycetes;c__Phycisphaerae;o__WD2101;f__;g__;s__
OTU32237	3.95726e-05	0.000117622	0.000260202	6.20232e-05	0.000247052	5.44277e-05	9.52358e-05	6.94155e-05	0	0	0	0	0	0	0	0	k__Bacteria	p__Planctomycetes	c__Phycisphaerae	o__WD2101	f__	g__	s__	New.CleanUp.ReferenceOTU124926		k__Bacteria;p__Planctomycetes;c__Phycisphaerae;o__WD2101;f__;g__;s__
OTU30062	0	4.70489e-05	2.16835e-05	9.30348e-05	0.000404267	0.000571491	0.00045237	2.31385e-05	0	2.69027e-05	8.73534e-05	0	0	2.58545e-05	2.4785e-05	0.000128447	k__Bacteria	p__Planctomycetes	c__Phycisphaerae	o__WD2101	f__	g__	s__	New.CleanUp.ReferenceOTU111014		k__Bacteria;p__Planctomycetes;c__Phycisphaerae;o__WD2101;f__;g__;s__
OTU8866	5.93589e-05	0.000141147	0.000607138	0.000341128	0.00096575	0.000244925	0.000666651	0.000347078	0	2.69027e-05	2.18384e-05	0	0	0	0	0	k__Bacteria	p__Planctomycetes	c__Phycisphaerae	o__WD2101	f__	g__	s__	4426791		k__Bacteria;p__Planctomycetes;c__Phycisphaerae;o__WD2101;f__;g__;s__
OTU2412	0.00128611	0.00178786	0.0038163	0.0103579	0.00795059	0.00070756	0.00445227	0.00853811	0	5.38054e-05	0	0	0	0	0	0	k__Bacteria	p__Planctomycetes	c__Phycisphaerae	o__WD2101	f__	g__	s__	4416961		k__Bacteria;p__Planctomycetes;c__Phycisphaerae;o__WD2101;f__;g__;s__
OTU8673	0.00223585	0.000164671	0.000303569	0.00167463	0.000808535	0.000625918	0.00111902	0.00129576	0	2.69027e-05	0	0	0	0	0	0	k__Bacteria	p__Planctomycetes	c__Phycisphaerae	o__WD2101	f__	g__	s__	4352292		k__Bacteria;p__Planctomycetes;c__Phycisphaerae;o__WD2101;f__;g__;s__
OTU1478	0.00180055	0.000893928	0.00271044	0.00139552	0.000516564	0	0.000833313	0.00108751	0	0	0	0	0	0	0	0	k__Bacteria	p__Planctomycetes	c__Phycisphaerae	o__WD2101	f__	g__	s__	1140307		k__Bacteria;p__Planctomycetes;c__Phycisphaerae;o__WD2101;f__;g__;s__
OTU5984	0.000415512	0.000258769	0.00208162	0.00176766	0.000247052	0	7.14269e-05	0.000578463	0	0	0	0	0	0	0	0	k__Bacteria	p__Planctomycetes	c__Phycisphaerae	o__WD2101	f__	g__	s__	1111372		k__Bacteria;p__Planctomycetes;c__Phycisphaerae;o__WD2101;f__;g__;s__
OTU6019	0.00152355	0.000164671	0.000108418	0.000837313	0	0	0	0.000393355	0	0	0	0	0	0	0	0	k__Bacteria	p__Planctomycetes	c__Phycisphaerae	o__WD2101	f__	g__	s__	927380		k__Bacteria;p__Planctomycetes;c__Phycisphaerae;o__WD2101;f__;g__;s__
OTU1728	0.00015829	0.00124679	0.0021033	0.000372139	0.00137002	0.000435422	9.52358e-05	0.00268407	0	2.69027e-05	0	0	0	0	0	0	k__Bacteria	p__Planctomycetes	c__Phycisphaerae	o__WD2101	f__	g__	s__	915958		k__Bacteria;p__Planctomycetes;c__Phycisphaerae;o__WD2101;f__;g__;s__
OTU9848	0.00253265	0.00197605	0.000195152	0.000279104	2.24593e-05	0	9.52358e-05	6.94155e-05	0.000632778	0	0	0	0	2.58545e-05	0	0	k__Bacteria	p__Planctomycetes	c__Phycisphaerae	o__WD2101	f__	g__	s__	912714		k__Bacteria;p__Planctomycetes;c__Phycisphaerae;o__WD2101;f__;g__;s__
OTU7693	5.93589e-05	7.05733e-05	8.6734e-05	3.10116e-05	2.24593e-05	2.72138e-05	0.000166663	0.000138831	0	0	0	0	0	0	0	0	k__Bacteria	p__Planctomycetes	c__Phycisphaerae	o__WD2101	f__	g__	s__	901942		k__Bacteria;p__Planctomycetes;c__Phycisphaerae;o__WD2101;f__;g__;s__
OTU1289	0.000613376	0.00143499	0.00121428	0.00176766	0.00195396	0.000489849	0.00149996	0.00203619	0.00018456	5.38054e-05	6.55151e-05	0	0	0.000310254	0	0.000293594	k__Bacteria	p__Planctomycetes	c__Phycisphaerae	o__WD2101	f__	g__	s__	807299		k__Bacteria;p__Planctomycetes;c__Phycisphaerae;o__WD2101;f__;g__;s__
OTU205	0.000138504	0	0.000151785	3.10116e-05	0.000202134	0	9.52358e-05	0.000138831	0	0	0	0	0	0	0	0	k__Bacteria	p__Planctomycetes	c__Phycisphaerae	o__WD2101	f__	g__	s__	568391		k__Bacteria;p__Planctomycetes;c__Phycisphaerae;o__WD2101;f__;g__;s__
OTU10046	0	7.05733e-05	0	0	0.000269512	0.000163283	7.14269e-05	0	0	5.38054e-05	0	0	0	0	0	0	k__Bacteria	p__Planctomycetes	c__Phycisphaerae	o__WD2101	f__	g__	s__	559033		k__Bacteria;p__Planctomycetes;c__Phycisphaerae;o__WD2101;f__;g__;s__
OTU2225	0.000692521	0.000846879	0.00188647	0.00145755	0.00137002	0.000898057	0.00161901	0.00178167	0	0.000134513	2.18384e-05	0	0	0	7.4355e-05	3.66993e-05	k__Bacteria	p__Planctomycetes	c__Phycisphaerae	o__WD2101	f__	g__	s__	543366		k__Bacteria;p__Planctomycetes;c__Phycisphaerae;o__WD2101;f__;g__;s__
OTU106	0.00015829	4.70489e-05	6.50505e-05	3.10116e-05	8.98372e-05	0	9.52358e-05	4.6277e-05	0	0	2.18384e-05	2.08372e-05	0	0	0	0	k__Bacteria	p__Planctomycetes	c__Phycisphaerae	o__WD2101	f__	g__	s__	513586		k__Bacteria;p__Planctomycetes;c__Phycisphaerae;o__WD2101;f__;g__;s__
OTU7002	0.00075188	0.000564586	0.000585455	0.000868325	0.00114542	0.000163283	0.000309516	0.0012032	0	2.69027e-05	2.18384e-05	0	0	0	0	0	k__Bacteria	p__Planctomycetes	c__Phycisphaerae	o__WD2101	f__	g__	s__	286652		k__Bacteria;p__Planctomycetes;c__Phycisphaerae;o__WD2101;f__;g__;s__
OTU4763	9.89315e-05	0.000776306	0.000975758	0.000527197	0.00031443	0	0.000404752	0.000948679	2.63657e-05	8.07081e-05	0	0	0	2.58545e-05	0	0	k__Bacteria	p__Planctomycetes	c__Phycisphaerae	o__WD2101	f__	g__	s__	250291		k__Bacteria;p__Planctomycetes;c__Phycisphaerae;o__WD2101;f__;g__;s__
OTU5804	9.89315e-05	2.35244e-05	0.00036862	0.00077529	2.24593e-05	0	0	0.000115693	0	0	0	0	0	0	0	0	k__Bacteria	p__Planctomycetes	c__Phycisphaerae	o__WD2101	f__	g__	s__	247867		k__Bacteria;p__Planctomycetes;c__Phycisphaerae;o__WD2101;f__;g__;s__
OTU8388	0.000257222	0.000117622	0.000889024	0.00058922	0.00258282	0.00114298	0.00149996	0.000509047	0	0.000161416	2.18384e-05	0	7.24935e-05	0	0	1.83496e-05	k__Bacteria	p__Planctomycetes	c__Phycisphaerae	o__WD2101	f__	g__	s__	224072		k__Bacteria;p__Planctomycetes;c__Phycisphaerae;o__WD2101;f__;g__;s__
OTU10321	0.000118718	4.70489e-05	4.3367e-05	6.20232e-05	6.73779e-05	5.44277e-05	4.76179e-05	4.6277e-05	0	0	0	0	0	0	0	0	k__Bacteria	p__Planctomycetes	c__Phycisphaerae	o__WD2101	f__	g__	s__	223655		k__Bacteria;p__Planctomycetes;c__Phycisphaerae;o__WD2101;f__;g__;s__
OTU4920	0.000118718	0.000329342	0.000823973	0.00198474	0.000741157	0	0.000499988	0.00273034	0	0	0	0	0	0	0	0	k__Bacteria	p__Planctomycetes	c__Phycisphaerae	o__WD2101	f__	g__	s__	223251		k__Bacteria;p__Planctomycetes;c__Phycisphaerae;o__WD2101;f__;g__;s__
OTU7906	0.000474871	2.35244e-05	0.000542088	0.00018607	0	0	7.14269e-05	2.31385e-05	0	0	2.18384e-05	0	0	0	0	1.83496e-05	k__Bacteria	p__Planctomycetes	c__Phycisphaerae	o__WD2101	f__	g__	s__	216375		k__Bacteria;p__Planctomycetes;c__Phycisphaerae;o__WD2101;f__;g__;s__
OTU2254	0.00142461	0.00181138	0.00123596	0.000527197	0.000606401	0.000299352	0.00135711	0.0018048	0	2.69027e-05	0	0	0	0	0	0.000110098	k__Bacteria	p__Planctomycetes	c__Phycisphaerae	o__WD2101	f__	g__	s__	216191		k__Bacteria;p__Planctomycetes;c__Phycisphaerae;o__WD2101;f__;g__;s__
OTU9522	0.000336367	0.000305818	0.00166963	0.0021398	0.000651319	8.16415e-05	0.000285707	0.00016197	0	0.00029593	0	0	2.41645e-05	2.58545e-05	0	1.83496e-05	k__Bacteria	p__Planctomycetes	c__Phycisphaerae	o__WD2101	f__	g__	s__	215591		k__Bacteria;p__Planctomycetes;c__Phycisphaerae;o__WD2101;f__;g__;s__
OTU7152	3.95726e-05	0	0.00036862	9.30348e-05	0	0	9.52358e-05	0.000300801	0	0	0	0	0	0	0	0	k__Bacteria	p__Planctomycetes	c__Phycisphaerae	o__WD2101	f__	g__	s__	211992		k__Bacteria;p__Planctomycetes;c__Phycisphaerae;o__WD2101;f__;g__;s__
OTU10962	3.95726e-05	2.35244e-05	0.000238519	9.30348e-05	0.000247052	0	0.000142854	0.000115693	0	0	0	0	0	0	0	0	k__Bacteria	p__Planctomycetes	c__Phycisphaerae	o__WD2101	f__	g__	s__	211309		k__Bacteria;p__Planctomycetes;c__Phycisphaerae;o__WD2101;f__;g__;s__
OTU4584	1.97863e-05	0	0	0.000124046	0.000763616	0.000380994	0.000214281	0.000115693	0	0	0	0	0	0	0	0	k__Bacteria	p__Planctomycetes	c__Phycisphaerae	o__WD2101	f__	g__	s__	112280		k__Bacteria;p__Planctomycetes;c__Phycisphaerae;o__WD2101;f__;g__;s__
OTU9583	0.00104867	0.000846879	0.00179973	0.00111642	0.00175182	0.000734774	0.000357134	0.000185108	5.27315e-05	0.000780178	0.000174707	0.000937676	0.000797429	0.000387817	0.000123925	0.000128447	k__Bacteria	p__Planctomycetes	c__Phycisphaerae	o__WD2101	f__	g__	s__	111162		k__Bacteria;p__Planctomycetes;c__Phycisphaerae;o__WD2101;f__;g__;s__
OTU2482	0.000613376	0.000611635	0.00101912	0.00192272	0.00422235	0.00239482	0.00471417	0.00229071	0.000158194	2.69027e-05	8.73534e-05	0.000166698	2.41645e-05	0.000413672	9.914e-05	5.50489e-05	k__Bacteria	p__Planctomycetes	c__Phycisphaerae	o__WD2101	f__	g__	s__	109707		k__Bacteria;p__Planctomycetes;c__Phycisphaerae;o__WD2101;f__;g__;s__
OTU6388	0.00142461	0.00110565	0.000281886	0.00102338	0.000291971	0	0.000142854	0.000555324	0	0	0	0	0	0	0	0	k__Bacteria	p__Planctomycetes	c__Phycisphaerae	o__WD2101	f__	g__	s__	65683		k__Bacteria;p__Planctomycetes;c__Phycisphaerae;o__WD2101;f__;g__;s__
OTU11893	0	0	4.3367e-05	0	6.73779e-05	5.44277e-05	7.14269e-05	4.6277e-05	0	0	0	0	0	0	0	0	k__Bacteria	p__Planctomycetes	c__Planctomycetia	o__Gemmatales	f__Gemmataceae	g__	s__	New.ReferenceOTU805		k__Bacteria;p__Planctomycetes;c__Planctomycetia;o__Gemmatales;f__Gemmataceae;g__;s__
OTU11822	3.95726e-05	2.35244e-05	0.000173468	9.30348e-05	0.000179674	2.72138e-05	0.000357134	0.000347078	0	0	2.18384e-05	0.000104186	0	0	0.00014871	0	k__Bacteria	p__Planctomycetes	c__Planctomycetia	o__Gemmatales	f__Gemmataceae	g__	s__	New.ReferenceOTU708		k__Bacteria;p__Planctomycetes;c__Planctomycetia;o__Gemmatales;f__Gemmataceae;g__;s__
OTU11680	0	0	6.50505e-05	0.000155058	2.24593e-05	5.44277e-05	4.76179e-05	6.94155e-05	0	0	0	0	0	0	0	0	k__Bacteria	p__Planctomycetes	c__Planctomycetia	o__Gemmatales	f__Gemmataceae	g__	s__	New.ReferenceOTU584		k__Bacteria;p__Planctomycetes;c__Planctomycetia;o__Gemmatales;f__Gemmataceae;g__;s__
OTU12270	0	7.05733e-05	0.000108418	0.000155058	4.49186e-05	2.72138e-05	9.52358e-05	0.000138831	0	0	0	0	0	0	0	0	k__Bacteria	p__Planctomycetes	c__Planctomycetia	o__Gemmatales	f__Gemmataceae	g__	s__	New.ReferenceOTU16		k__Bacteria;p__Planctomycetes;c__Planctomycetia;o__Gemmatales;f__Gemmataceae;g__;s__
OTU11928	9.89315e-05	0.00021172	0.000130101	0.000248093	0.000426727	0.00035378	0.000333325	0.000717294	0	0	0	0	0	0	0	0	k__Bacteria	p__Planctomycetes	c__Planctomycetia	o__Gemmatales	f__Gemmataceae	g__	s__	New.ReferenceOTU1174		k__Bacteria;p__Planctomycetes;c__Planctomycetia;o__Gemmatales;f__Gemmataceae;g__;s__
OTU11661	1.97863e-05	4.70489e-05	4.3367e-05	6.20232e-05	0	5.44277e-05	2.3809e-05	2.31385e-05	0	0	0	0	0	0	0	0	k__Bacteria	p__Planctomycetes	c__Planctomycetia	o__Gemmatales	f__Gemmataceae	g__	s__	New.ReferenceOTU1069		k__Bacteria;p__Planctomycetes;c__Planctomycetia;o__Gemmatales;f__Gemmataceae;g__;s__
OTU12072	0.00015829	2.35244e-05	0.000130101	0.00018607	0.000134756	0.000299352	2.3809e-05	0.000208247	0	0.000134513	2.18384e-05	2.08372e-05	0	0	0	3.66993e-05	k__Bacteria	p__Planctomycetes	c__Planctomycetia	o__Gemmatales	f__Gemmataceae	g__	s__	New.ReferenceOTU1045		k__Bacteria;p__Planctomycetes;c__Planctomycetia;o__Gemmatales;f__Gemmataceae;g__;s__
OTU27177	5.93589e-05	9.40977e-05	0.000108418	3.10116e-05	0.000202134	2.72138e-05	7.14269e-05	0.000185108	0	0	0	0	0	0	0	0	k__Bacteria	p__Planctomycetes	c__Planctomycetia	o__Gemmatales	f__Gemmataceae	g__	s__	New.CleanUp.ReferenceOTU91985		k__Bacteria;p__Planctomycetes;c__Planctomycetia;o__Gemmatales;f__Gemmataceae;g__;s__
OTU25800	1.97863e-05	4.70489e-05	2.16835e-05	3.10116e-05	4.49186e-05	5.44277e-05	7.14269e-05	4.6277e-05	0	0	0	2.08372e-05	0	0	2.4785e-05	0	k__Bacteria	p__Planctomycetes	c__Planctomycetia	o__Gemmatales	f__Gemmataceae	g__	s__	New.CleanUp.ReferenceOTU82972		k__Bacteria;p__Planctomycetes;c__Planctomycetia;o__Gemmatales;f__Gemmataceae;g__;s__
OTU25096	0	0	0	6.20232e-05	8.98372e-05	0.000136069	0.000214281	6.94155e-05	0	0	0	0	0	0	0	0	k__Bacteria	p__Planctomycetes	c__Planctomycetia	o__Gemmatales	f__Gemmataceae	g__	s__	New.CleanUp.ReferenceOTU78428		k__Bacteria;p__Planctomycetes;c__Planctomycetia;o__Gemmatales;f__Gemmataceae;g__;s__
OTU24767	0	4.70489e-05	6.50505e-05	9.30348e-05	0	0	7.14269e-05	2.31385e-05	0	0	0	0	0	0	0	0	k__Bacteria	p__Planctomycetes	c__Planctomycetia	o__Gemmatales	f__Gemmataceae	g__	s__	New.CleanUp.ReferenceOTU76290		k__Bacteria;p__Planctomycetes;c__Planctomycetia;o__Gemmatales;f__Gemmataceae;g__;s__
OTU23232	1.97863e-05	2.35244e-05	0.000130101	0.000496186	2.24593e-05	0.000244925	0.000214281	0.000277662	0	0	0	0	0	0	0	0	k__Bacteria	p__Planctomycetes	c__Planctomycetia	o__Gemmatales	f__Gemmataceae	g__	s__	New.CleanUp.ReferenceOTU66535		k__Bacteria;p__Planctomycetes;c__Planctomycetia;o__Gemmatales;f__Gemmataceae;g__;s__
OTU22189	9.89315e-05	4.70489e-05	0.000108418	0.000155058	0	0	2.3809e-05	0.000115693	0	0	0	0	0	0	0	0	k__Bacteria	p__Planctomycetes	c__Planctomycetia	o__Gemmatales	f__Gemmataceae	g__	s__	New.CleanUp.ReferenceOTU59860		k__Bacteria;p__Planctomycetes;c__Planctomycetia;o__Gemmatales;f__Gemmataceae;g__;s__
OTU21526	0	0	4.3367e-05	3.10116e-05	0.000112296	5.44277e-05	7.14269e-05	6.94155e-05	0	0	0	0	0	0	0	0	k__Bacteria	p__Planctomycetes	c__Planctomycetia	o__Gemmatales	f__Gemmataceae	g__	s__	New.CleanUp.ReferenceOTU55675		k__Bacteria;p__Planctomycetes;c__Planctomycetia;o__Gemmatales;f__Gemmataceae;g__;s__
OTU20914	9.89315e-05	0.000329342	0.000195152	0.000279104	2.24593e-05	0	2.3809e-05	2.31385e-05	0	0	2.18384e-05	0	0	0	0	0	k__Bacteria	p__Planctomycetes	c__Planctomycetia	o__Gemmatales	f__Gemmataceae	g__	s__	New.CleanUp.ReferenceOTU52004		k__Bacteria;p__Planctomycetes;c__Planctomycetia;o__Gemmatales;f__Gemmataceae;g__;s__
OTU17593	0.000138504	0.000188195	0.000195152	0.000434162	0	0	0	2.31385e-05	0	2.69027e-05	0	0	0	0	0	0	k__Bacteria	p__Planctomycetes	c__Planctomycetia	o__Gemmatales	f__Gemmataceae	g__	s__	New.CleanUp.ReferenceOTU31530		k__Bacteria;p__Planctomycetes;c__Planctomycetia;o__Gemmatales;f__Gemmataceae;g__;s__
OTU61418	9.89315e-05	0.00021172	0	0.000279104	6.73779e-05	0	0	0.00016197	0	0	0	0	0	0	0	0	k__Bacteria	p__Planctomycetes	c__Planctomycetia	o__Gemmatales	f__Gemmataceae	g__	s__	New.CleanUp.ReferenceOTU307733		k__Bacteria;p__Planctomycetes;c__Planctomycetia;o__Gemmatales;f__Gemmataceae;g__;s__
OTU53481	0	0.000117622	2.16835e-05	0.000434162	4.49186e-05	0.00070756	0.000333325	0.000347078	0	0	0	0	0	0	0	0	k__Bacteria	p__Planctomycetes	c__Planctomycetia	o__Gemmatales	f__Gemmataceae	g__	s__	New.CleanUp.ReferenceOTU257706		k__Bacteria;p__Planctomycetes;c__Planctomycetia;o__Gemmatales;f__Gemmataceae;g__;s__
OTU49639	0	7.05733e-05	2.16835e-05	9.30348e-05	2.24593e-05	0.000163283	0.000214281	0.000185108	0	0	0	0	0	0	0	0	k__Bacteria	p__Planctomycetes	c__Planctomycetia	o__Gemmatales	f__Gemmataceae	g__	s__	New.CleanUp.ReferenceOTU234083		k__Bacteria;p__Planctomycetes;c__Planctomycetia;o__Gemmatales;f__Gemmataceae;g__;s__
OTU48557	0	0	2.16835e-05	9.30348e-05	4.49186e-05	0.000108855	4.76179e-05	4.6277e-05	0	0	0	0	0	0	0	0	k__Bacteria	p__Planctomycetes	c__Planctomycetia	o__Gemmatales	f__Gemmataceae	g__	s__	New.CleanUp.ReferenceOTU227579		k__Bacteria;p__Planctomycetes;c__Planctomycetia;o__Gemmatales;f__Gemmataceae;g__;s__
OTU15428	0	0	6.50505e-05	6.20232e-05	0.000157215	0.00035378	0.000285707	4.6277e-05	0	0	2.18384e-05	0	0	0	0	1.83496e-05	k__Bacteria	p__Planctomycetes	c__Planctomycetia	o__Gemmatales	f__Gemmataceae	g__	s__	New.CleanUp.ReferenceOTU18318		k__Bacteria;p__Planctomycetes;c__Planctomycetia;o__Gemmatales;f__Gemmataceae;g__;s__
OTU40315	0	2.35244e-05	0.000303569	0.000372139	0.000134756	0.000190497	0.000166663	0.000555324	0	0	0	0	0	0	0	0	k__Bacteria	p__Planctomycetes	c__Planctomycetia	o__Gemmatales	f__Gemmataceae	g__	s__	New.CleanUp.ReferenceOTU177750		k__Bacteria;p__Planctomycetes;c__Planctomycetia;o__Gemmatales;f__Gemmataceae;g__;s__
OTU39888	3.95726e-05	0.000117622	2.16835e-05	0.000155058	8.98372e-05	2.72138e-05	0	0.000115693	0	0	0	0	0	0	0	0	k__Bacteria	p__Planctomycetes	c__Planctomycetia	o__Gemmatales	f__Gemmataceae	g__	s__	New.CleanUp.ReferenceOTU175395		k__Bacteria;p__Planctomycetes;c__Planctomycetia;o__Gemmatales;f__Gemmataceae;g__;s__
OTU39848	1.97863e-05	2.35244e-05	0.000108418	0.000155058	2.24593e-05	5.44277e-05	7.14269e-05	0.000115693	0	0	0	0	2.41645e-05	0	2.4785e-05	0	k__Bacteria	p__Planctomycetes	c__Planctomycetia	o__Gemmatales	f__Gemmataceae	g__	s__	New.CleanUp.ReferenceOTU175169		k__Bacteria;p__Planctomycetes;c__Planctomycetia;o__Gemmatales;f__Gemmataceae;g__;s__
OTU39529	3.95726e-05	0.000117622	4.3367e-05	0	0	0	4.76179e-05	9.2554e-05	0	0	0	0	0	0	0	0	k__Bacteria	p__Planctomycetes	c__Planctomycetia	o__Gemmatales	f__Gemmataceae	g__	s__	New.CleanUp.ReferenceOTU173198		k__Bacteria;p__Planctomycetes;c__Planctomycetia;o__Gemmatales;f__Gemmataceae;g__;s__
OTU36880	0.000138504	0.00021172	2.16835e-05	0.000155058	6.73779e-05	0	0	2.31385e-05	0	0	0	0	0	0	0	0	k__Bacteria	p__Planctomycetes	c__Planctomycetia	o__Gemmatales	f__Gemmataceae	g__	s__	New.CleanUp.ReferenceOTU155761		k__Bacteria;p__Planctomycetes;c__Planctomycetia;o__Gemmatales;f__Gemmataceae;g__;s__
OTU31749	0.000237436	0.000117622	0.000130101	0.00018607	0	0	2.3809e-05	2.31385e-05	0	0	0	0	0	0	0	0	k__Bacteria	p__Planctomycetes	c__Planctomycetia	o__Gemmatales	f__Gemmataceae	g__	s__	New.CleanUp.ReferenceOTU121830		k__Bacteria;p__Planctomycetes;c__Planctomycetia;o__Gemmatales;f__Gemmataceae;g__;s__
OTU3060	0	9.40977e-05	0.000173468	0.000217081	0.000202134	0.00035378	0.000166663	0.00016197	0	0	2.18384e-05	0	2.41645e-05	0	2.4785e-05	1.83496e-05	k__Bacteria	p__Planctomycetes	c__Planctomycetia	o__Gemmatales	f__Gemmataceae	g__	s__	4452696		k__Bacteria;p__Planctomycetes;c__Planctomycetia;o__Gemmatales;f__Gemmataceae;g__;s__
OTU10105	3.95726e-05	2.35244e-05	0.000195152	6.20232e-05	6.73779e-05	0	9.52358e-05	0.000370216	0	0	0	0	0	0	0	0	k__Bacteria	p__Planctomycetes	c__Planctomycetia	o__Gemmatales	f__Gemmataceae	g__	s__	4383662		k__Bacteria;p__Planctomycetes;c__Planctomycetia;o__Gemmatales;f__Gemmataceae;g__;s__
OTU9230	0.00015829	4.70489e-05	8.6734e-05	0.000155058	4.49186e-05	2.72138e-05	4.76179e-05	0.000138831	0	0	0	0	0	0	0	0	k__Bacteria	p__Planctomycetes	c__Planctomycetia	o__Gemmatales	f__Gemmataceae	g__	s__	3276016		k__Bacteria;p__Planctomycetes;c__Planctomycetia;o__Gemmatales;f__Gemmataceae;g__;s__
OTU2799	0.000296795	0.000399915	4.3367e-05	0.000558209	0.00031443	0.000163283	0.000404752	0.000347078	0	0	0	0	0	0	0	0	k__Bacteria	p__Planctomycetes	c__Planctomycetia	o__Gemmatales	f__Gemmataceae	g__	s__	3105433		k__Bacteria;p__Planctomycetes;c__Planctomycetia;o__Gemmatales;f__Gemmataceae;g__;s__
OTU6137	0.000118718	4.70489e-05	0.000151785	0.000403151	0	0	0	0.000185108	0	0	0	0	0	0	0	0	k__Bacteria	p__Planctomycetes	c__Planctomycetia	o__Gemmatales	f__Gemmataceae	g__	s__	2296337		k__Bacteria;p__Planctomycetes;c__Planctomycetia;o__Gemmatales;f__Gemmataceae;g__;s__
OTU3909	0	7.05733e-05	4.3367e-05	6.20232e-05	2.24593e-05	0.00035378	0.000190472	9.2554e-05	0	0	0	0	0	0	0	0	k__Bacteria	p__Planctomycetes	c__Planctomycetia	o__Gemmatales	f__Gemmataceae	g__	s__	1058769		k__Bacteria;p__Planctomycetes;c__Planctomycetia;o__Gemmatales;f__Gemmataceae;g__;s__
OTU10987	0	0	6.50505e-05	0.000372139	2.24593e-05	0	4.76179e-05	9.2554e-05	0	0	0	0	0	0	0	0	k__Bacteria	p__Planctomycetes	c__Planctomycetia	o__Gemmatales	f__Gemmataceae	g__	s__	820036		k__Bacteria;p__Planctomycetes;c__Planctomycetia;o__Gemmatales;f__Gemmataceae;g__;s__
OTU10679	0	4.70489e-05	0	0	4.49186e-05	0.000244925	0.000309516	4.6277e-05	0	0	0	0	0	0	0	0	k__Bacteria	p__Planctomycetes	c__Planctomycetia	o__Gemmatales	f__Gemmataceae	g__	s__	741493		k__Bacteria;p__Planctomycetes;c__Planctomycetia;o__Gemmatales;f__Gemmataceae;g__;s__
OTU8342	7.91452e-05	0	4.3367e-05	0.000248093	0.000269512	0.000326566	0.00069046	0.000393355	2.63657e-05	2.69027e-05	4.36767e-05	0	0	0	0	1.83496e-05	k__Bacteria	p__Planctomycetes	c__Planctomycetia	o__Gemmatales	f__Gemmataceae	g__	s__	590906		k__Bacteria;p__Planctomycetes;c__Planctomycetia;o__Gemmatales;f__Gemmataceae;g__;s__
OTU1972	3.95726e-05	0.00021172	0.000151785	0.000248093	0.000157215	0.000136069	0.000190472	0.00016197	0	2.69027e-05	0	0	0	0	2.4785e-05	0	k__Bacteria	p__Planctomycetes	c__Planctomycetia	o__Gemmatales	f__Gemmataceae	g__	s__	563036		k__Bacteria;p__Planctomycetes;c__Planctomycetia;o__Gemmatales;f__Gemmataceae;g__;s__
OTU7962	3.95726e-05	7.05733e-05	4.3367e-05	0.000124046	6.73779e-05	0.000108855	2.3809e-05	0.000115693	0	0	2.18384e-05	2.08372e-05	4.8329e-05	0	0	0	k__Bacteria	p__Planctomycetes	c__Planctomycetia	o__Gemmatales	f__Gemmataceae	g__	s__	561767		k__Bacteria;p__Planctomycetes;c__Planctomycetia;o__Gemmatales;f__Gemmataceae;g__;s__
OTU662	0.00015829	0.000117622	8.6734e-05	0.000279104	2.24593e-05	8.16415e-05	0.000166663	0.000208247	0	2.69027e-05	0	0	0	0	0	0	k__Bacteria	p__Planctomycetes	c__Planctomycetia	o__Gemmatales	f__Gemmataceae	g__	s__	558858		k__Bacteria;p__Planctomycetes;c__Planctomycetia;o__Gemmatales;f__Gemmataceae;g__;s__
OTU9383	1.97863e-05	7.05733e-05	2.16835e-05	0.000124046	8.98372e-05	8.16415e-05	0.000119045	0.000185108	0	0	0	0	0	0	2.4785e-05	0	k__Bacteria	p__Planctomycetes	c__Planctomycetia	o__Gemmatales	f__Gemmataceae	g__	s__	549231		k__Bacteria;p__Planctomycetes;c__Planctomycetia;o__Gemmatales;f__Gemmataceae;g__;s__
OTU9264	0.000178077	4.70489e-05	0.000390303	0.000155058	4.49186e-05	0	0.000190472	0.000439632	0	0	0	0	0	0	0	0	k__Bacteria	p__Planctomycetes	c__Planctomycetia	o__Gemmatales	f__Gemmataceae	g__	s__	318184		k__Bacteria;p__Planctomycetes;c__Planctomycetia;o__Gemmatales;f__Gemmataceae;g__;s__
OTU10052	0.000732093	0.000517537	0.000780606	0.00058922	0.000247052	0	0.000142854	0.000254524	0	2.69027e-05	0	0	0	2.58545e-05	0	0	k__Bacteria	p__Planctomycetes	c__Planctomycetia	o__Gemmatales	f__Gemmataceae	g__	s__	279355		k__Bacteria;p__Planctomycetes;c__Planctomycetia;o__Gemmatales;f__Gemmataceae;g__;s__
OTU11115	1.97863e-05	7.05733e-05	0.000108418	0	0.000134756	2.72138e-05	0	6.94155e-05	0	0	0	0	0	0	0	0	k__Bacteria	p__Planctomycetes	c__Planctomycetia	o__Gemmatales	f__Gemmataceae	g__	s__	214051		k__Bacteria;p__Planctomycetes;c__Planctomycetia;o__Gemmatales;f__Gemmataceae;g__;s__
OTU5523	0	2.35244e-05	6.50505e-05	6.20232e-05	0.000920831	2.72138e-05	4.76179e-05	0.000185108	0	0	0	0	0	0	0	0	k__Bacteria	p__Planctomycetes	c__Planctomycetia	o__Gemmatales	f__Gemmataceae	g__	s__	201597		k__Bacteria;p__Planctomycetes;c__Planctomycetia;o__Gemmatales;f__Gemmataceae;g__;s__
OTU60183	0.000257222	4.70489e-05	0.000281886	6.20232e-05	0	0	4.76179e-05	0	0	0	0	0	0	0	0	0	k__Bacteria	p__Planctomycetes	c__Planctomycetia	o__Gemmatales	f__Gemmataceae	g__Gemmata	s__	New.CleanUp.ReferenceOTU299863		k__Bacteria;p__Planctomycetes;c__Planctomycetia;o__Gemmatales;f__Gemmataceae;g__Gemmata;s__
OTU57982	3.95726e-05	0	2.16835e-05	3.10116e-05	4.49186e-05	5.44277e-05	4.76179e-05	9.2554e-05	0	0	0	0	0	0	0	0	k__Bacteria	p__Planctomycetes	c__Planctomycetia	o__Gemmatales	f__Gemmataceae	g__Gemmata	s__	New.CleanUp.ReferenceOTU286071		k__Bacteria;p__Planctomycetes;c__Planctomycetia;o__Gemmatales;f__Gemmataceae;g__Gemmata;s__
OTU53511	3.95726e-05	0	6.50505e-05	0.000155058	4.49186e-05	0	2.3809e-05	4.6277e-05	0	0	0	0	0	0	0	0	k__Bacteria	p__Planctomycetes	c__Planctomycetia	o__Gemmatales	f__Gemmataceae	g__Gemmata	s__	New.CleanUp.ReferenceOTU257850		k__Bacteria;p__Planctomycetes;c__Planctomycetia;o__Gemmatales;f__Gemmataceae;g__Gemmata;s__
OTU42586	0.000237436	0.000282293	0.000325253	3.10116e-05	0	0	0	0	0	0	0	0	0	0	0	0	k__Bacteria	p__Planctomycetes	c__Planctomycetia	o__Gemmatales	f__Gemmataceae	g__Gemmata	s__	New.CleanUp.ReferenceOTU191202		k__Bacteria;p__Planctomycetes;c__Planctomycetia;o__Gemmatales;f__Gemmataceae;g__Gemmata;s__
OTU14455	0	0	0	9.30348e-05	0.000359349	0.00035378	0.000142854	2.31385e-05	0	0	0	0	0	0	0	0	k__Bacteria	p__Planctomycetes	c__Planctomycetia	o__Gemmatales	f__Gemmataceae	g__Gemmata	s__	New.CleanUp.ReferenceOTU12556		k__Bacteria;p__Planctomycetes;c__Planctomycetia;o__Gemmatales;f__Gemmataceae;g__Gemmata;s__
OTU10289	0	7.05733e-05	4.3367e-05	9.30348e-05	8.98372e-05	0	0	6.94155e-05	0	0	0	0	0	0	0	0	k__Bacteria	p__Planctomycetes	c__Planctomycetia	o__Gemmatales	f__Gemmataceae	g__Gemmata	s__	4437179		k__Bacteria;p__Planctomycetes;c__Planctomycetia;o__Gemmatales;f__Gemmataceae;g__Gemmata;s__
OTU882	9.89315e-05	0.000282293	0.00036862	0.000372139	6.73779e-05	2.72138e-05	9.52358e-05	0.00016197	0	2.69027e-05	0	0	0	0	4.957e-05	0	k__Bacteria	p__Planctomycetes	c__Planctomycetia	o__Gemmatales	f__Gemmataceae	g__Gemmata	s__	4402862		k__Bacteria;p__Planctomycetes;c__Planctomycetia;o__Gemmatales;f__Gemmataceae;g__Gemmata;s__
OTU2239	1.97863e-05	0.000258769	0.000151785	9.30348e-05	0.000134756	5.44277e-05	0.000119045	2.31385e-05	2.63657e-05	0	0	0	0	2.58545e-05	0	1.83496e-05	k__Bacteria	p__Planctomycetes	c__Planctomycetia	o__Gemmatales	f__Gemmataceae	g__Gemmata	s__	1896092		k__Bacteria;p__Planctomycetes;c__Planctomycetia;o__Gemmatales;f__Gemmataceae;g__Gemmata;s__
OTU8612	9.89315e-05	0.000117622	8.6734e-05	0.000124046	4.49186e-05	0	2.3809e-05	4.6277e-05	0	0	0	0	0	0	0	0	k__Bacteria	p__Planctomycetes	c__Planctomycetia	o__Gemmatales	f__Gemmataceae	g__Gemmata	s__	1146704		k__Bacteria;p__Planctomycetes;c__Planctomycetia;o__Gemmatales;f__Gemmataceae;g__Gemmata;s__
OTU5356	0.000138504	2.35244e-05	0.000151785	0.000217081	2.24593e-05	0	7.14269e-05	0.00016197	0	0	0	0	0	0	0	0	k__Bacteria	p__Planctomycetes	c__Planctomycetia	o__Gemmatales	f__Gemmataceae	g__Gemmata	s__	1102044		k__Bacteria;p__Planctomycetes;c__Planctomycetia;o__Gemmatales;f__Gemmataceae;g__Gemmata;s__
OTU943	3.95726e-05	4.70489e-05	6.50505e-05	0.000155058	0	0.000217711	2.3809e-05	0.000115693	2.63657e-05	0	2.18384e-05	0	0	5.1709e-05	0	3.66993e-05	k__Bacteria	p__Planctomycetes	c__Planctomycetia	o__Gemmatales	f__Gemmataceae	g__Gemmata	s__	1089898		k__Bacteria;p__Planctomycetes;c__Planctomycetia;o__Gemmatales;f__Gemmataceae;g__Gemmata;s__
OTU10017	3.95726e-05	0.000164671	6.50505e-05	3.10116e-05	0	0	0.000119045	0.000185108	0	0	0	0	0	0	0	0	k__Bacteria	p__Planctomycetes	c__Planctomycetia	o__Gemmatales	f__Gemmataceae	g__Gemmata	s__	1029858		k__Bacteria;p__Planctomycetes;c__Planctomycetia;o__Gemmatales;f__Gemmataceae;g__Gemmata;s__
OTU7790	0	0	8.6734e-05	3.10116e-05	0.000179674	0	0.000142854	0.00016197	0	0	0	0	0	0	0	0	k__Bacteria	p__Planctomycetes	c__Planctomycetia	o__Gemmatales	f__Gemmataceae	g__Gemmata	s__	1013500		k__Bacteria;p__Planctomycetes;c__Planctomycetia;o__Gemmatales;f__Gemmataceae;g__Gemmata;s__
OTU8800	0.000217649	0.000282293	0.000130101	0.000527197	0.000112296	5.44277e-05	4.76179e-05	0.00016197	0	0	0	0	0	0	4.957e-05	1.83496e-05	k__Bacteria	p__Planctomycetes	c__Planctomycetia	o__Gemmatales	f__Gemmataceae	g__Gemmata	s__	545782		k__Bacteria;p__Planctomycetes;c__Planctomycetia;o__Gemmatales;f__Gemmataceae;g__Gemmata;s__
OTU5844	0.000138504	0	6.50505e-05	0.000124046	0.000112296	5.44277e-05	0.000142854	6.94155e-05	0	2.69027e-05	6.55151e-05	0	0	0	0	7.33985e-05	k__Bacteria	p__Planctomycetes	c__Planctomycetia	o__Gemmatales	f__Gemmataceae	g__Gemmata	s__	524860		k__Bacteria;p__Planctomycetes;c__Planctomycetia;o__Gemmatales;f__Gemmataceae;g__Gemmata;s__
OTU2905	7.91452e-05	0	6.50505e-05	3.10116e-05	2.24593e-05	0	9.52358e-05	4.6277e-05	0	0	0	0	0	0	0	0	k__Bacteria	p__Planctomycetes	c__Planctomycetia	o__Gemmatales	f__Gemmataceae	g__Gemmata	s__	359924		k__Bacteria;p__Planctomycetes;c__Planctomycetia;o__Gemmatales;f__Gemmataceae;g__Gemmata;s__
OTU6163	0	0	8.6734e-05	0.000651244	8.98372e-05	0	0.000142854	0.000948679	0	0	0	0	0	0	0	0	k__Bacteria	p__Planctomycetes	c__Planctomycetia	o__Gemmatales	f__Gemmataceae	g__Gemmata	s__	332967		k__Bacteria;p__Planctomycetes;c__Planctomycetia;o__Gemmatales;f__Gemmataceae;g__Gemmata;s__
OTU2731	0.000672734	0.000329342	0.000390303	6.20232e-05	2.24593e-05	0	2.3809e-05	9.2554e-05	0	5.38054e-05	2.18384e-05	0	0	0	0	0	k__Bacteria	p__Planctomycetes	c__Planctomycetia	o__Gemmatales	f__Gemmataceae	g__Gemmata	s__	279203		k__Bacteria;p__Planctomycetes;c__Planctomycetia;o__Gemmatales;f__Gemmataceae;g__Gemmata;s__
OTU7878	1.97863e-05	0	6.50505e-05	0.000527197	0.000247052	0	9.52358e-05	0.00016197	0	0	0	0	0	0	0	0	k__Bacteria	p__Planctomycetes	c__Planctomycetia	o__Gemmatales	f__Gemmataceae	g__Gemmata	s__	268742		k__Bacteria;p__Planctomycetes;c__Planctomycetia;o__Gemmatales;f__Gemmataceae;g__Gemmata;s__
OTU5315	3.95726e-05	0	0.000108418	6.20232e-05	4.49186e-05	8.16415e-05	2.3809e-05	2.31385e-05	0	0	2.18384e-05	2.08372e-05	0	2.58545e-05	0	0	k__Bacteria	p__Planctomycetes	c__Planctomycetia	o__Gemmatales	f__Gemmataceae	g__Gemmata	s__	200854		k__Bacteria;p__Planctomycetes;c__Planctomycetia;o__Gemmatales;f__Gemmataceae;g__Gemmata;s__
OTU11750	1.97863e-05	7.05733e-05	2.16835e-05	0	0.000112296	8.16415e-05	2.3809e-05	9.2554e-05	0	0	2.18384e-05	2.08372e-05	0	0	0	0	k__Bacteria	p__Planctomycetes	c__Planctomycetia	o__Gemmatales	f__Isosphaeraceae	g__	s__	New.ReferenceOTU854		k__Bacteria;p__Planctomycetes;c__Planctomycetia;o__Gemmatales;f__Isosphaeraceae;g__;s__
OTU11964	5.93589e-05	4.70489e-05	0.000108418	3.10116e-05	8.98372e-05	8.16415e-05	4.76179e-05	6.94155e-05	2.63657e-05	0	4.36767e-05	0	0	0	0	1.83496e-05	k__Bacteria	p__Planctomycetes	c__Planctomycetia	o__Gemmatales	f__Isosphaeraceae	g__	s__	New.ReferenceOTU693		k__Bacteria;p__Planctomycetes;c__Planctomycetia;o__Gemmatales;f__Isosphaeraceae;g__;s__
OTU12340	5.93589e-05	4.70489e-05	0	6.20232e-05	8.98372e-05	0	7.14269e-05	4.6277e-05	2.63657e-05	0	0	0	0	0	0	0	k__Bacteria	p__Planctomycetes	c__Planctomycetia	o__Gemmatales	f__Isosphaeraceae	g__	s__	New.ReferenceOTU441		k__Bacteria;p__Planctomycetes;c__Planctomycetia;o__Gemmatales;f__Isosphaeraceae;g__;s__
OTU11542	0	2.35244e-05	2.16835e-05	6.20232e-05	0.000247052	0.000653132	0.000642842	0.00016197	0	0	2.18384e-05	0.000187535	0	0	0	1.83496e-05	k__Bacteria	p__Planctomycetes	c__Planctomycetia	o__Gemmatales	f__Isosphaeraceae	g__	s__	New.ReferenceOTU4		k__Bacteria;p__Planctomycetes;c__Planctomycetia;o__Gemmatales;f__Isosphaeraceae;g__;s__
OTU11730	0.000296795	0.000329342	4.3367e-05	9.30348e-05	4.49186e-05	5.44277e-05	9.52358e-05	0.000115693	0	0	0	0	0	0	0	0	k__Bacteria	p__Planctomycetes	c__Planctomycetia	o__Gemmatales	f__Isosphaeraceae	g__	s__	New.ReferenceOTU1084		k__Bacteria;p__Planctomycetes;c__Planctomycetia;o__Gemmatales;f__Isosphaeraceae;g__;s__
OTU67676	0	0.000141147	0	3.10116e-05	0.000112296	0.000653132	0.00154758	2.31385e-05	0	0	0	0	0	0	0	0	k__Bacteria	p__Planctomycetes	c__Planctomycetia	o__Gemmatales	f__Isosphaeraceae	g__	s__	New.CleanUp.ReferenceOTU348569		k__Bacteria;p__Planctomycetes;c__Planctomycetia;o__Gemmatales;f__Isosphaeraceae;g__;s__
OTU58675	5.93589e-05	7.05733e-05	8.6734e-05	0.000744278	0.000157215	2.72138e-05	0.000214281	0.000208247	0	0	0	0	0	0	0	0	k__Bacteria	p__Planctomycetes	c__Planctomycetia	o__Gemmatales	f__Isosphaeraceae	g__	s__	New.CleanUp.ReferenceOTU290324		k__Bacteria;p__Planctomycetes;c__Planctomycetia;o__Gemmatales;f__Isosphaeraceae;g__;s__
OTU53728	7.91452e-05	0.000164671	0.000173468	9.30348e-05	2.24593e-05	0	4.76179e-05	0	0	0	0	0	2.41645e-05	0	0	0	k__Bacteria	p__Planctomycetes	c__Planctomycetia	o__Gemmatales	f__Isosphaeraceae	g__	s__	New.CleanUp.ReferenceOTU259388		k__Bacteria;p__Planctomycetes;c__Planctomycetia;o__Gemmatales;f__Isosphaeraceae;g__;s__
OTU47030	5.93589e-05	2.35244e-05	0	0.000124046	4.49186e-05	0.000108855	0	9.2554e-05	0	0	0	0	0	0	0	0	k__Bacteria	p__Planctomycetes	c__Planctomycetia	o__Gemmatales	f__Isosphaeraceae	g__	s__	New.CleanUp.ReferenceOTU218040		k__Bacteria;p__Planctomycetes;c__Planctomycetia;o__Gemmatales;f__Isosphaeraceae;g__;s__
OTU45713	5.93589e-05	4.70489e-05	4.3367e-05	9.30348e-05	8.98372e-05	2.72138e-05	0.000119045	4.6277e-05	2.63657e-05	0	0	0	0	0	0	0	k__Bacteria	p__Planctomycetes	c__Planctomycetia	o__Gemmatales	f__Isosphaeraceae	g__	s__	New.CleanUp.ReferenceOTU210111		k__Bacteria;p__Planctomycetes;c__Planctomycetia;o__Gemmatales;f__Isosphaeraceae;g__;s__
OTU44781	0.000356154	0.000305818	4.3367e-05	0.000248093	2.24593e-05	2.72138e-05	0	0.000208247	0	0	0	0	0	0	0	0	k__Bacteria	p__Planctomycetes	c__Planctomycetia	o__Gemmatales	f__Isosphaeraceae	g__	s__	New.CleanUp.ReferenceOTU204255		k__Bacteria;p__Planctomycetes;c__Planctomycetia;o__Gemmatales;f__Isosphaeraceae;g__;s__
OTU35804	3.95726e-05	2.35244e-05	4.3367e-05	9.30348e-05	2.24593e-05	2.72138e-05	4.76179e-05	4.6277e-05	0	0	0	0	0	0	0	0	k__Bacteria	p__Planctomycetes	c__Planctomycetia	o__Gemmatales	f__Isosphaeraceae	g__	s__	New.CleanUp.ReferenceOTU148412		k__Bacteria;p__Planctomycetes;c__Planctomycetia;o__Gemmatales;f__Isosphaeraceae;g__;s__
OTU32203	0	2.35244e-05	0	0.000217081	6.73779e-05	0	0.000285707	6.94155e-05	2.63657e-05	0	4.36767e-05	0	0	0	0	0	k__Bacteria	p__Planctomycetes	c__Planctomycetia	o__Gemmatales	f__Isosphaeraceae	g__	s__	New.CleanUp.ReferenceOTU124735		k__Bacteria;p__Planctomycetes;c__Planctomycetia;o__Gemmatales;f__Isosphaeraceae;g__;s__
OTU5946	7.91452e-05	2.35244e-05	4.3367e-05	0	0	0	9.52358e-05	4.6277e-05	0	0	0	0	0	0	0	0	k__Bacteria	p__Planctomycetes	c__Planctomycetia	o__Gemmatales	f__Isosphaeraceae	g__	s__	4387070		k__Bacteria;p__Planctomycetes;c__Planctomycetia;o__Gemmatales;f__Isosphaeraceae;g__;s__
OTU8211	0.00182034	0.00021172	2.16835e-05	0.00117844	4.49186e-05	0	0.000166663	6.94155e-05	0	0	0	0	0	0	0	0	k__Bacteria	p__Planctomycetes	c__Planctomycetia	o__Gemmatales	f__Isosphaeraceae	g__	s__	4320960		k__Bacteria;p__Planctomycetes;c__Planctomycetia;o__Gemmatales;f__Isosphaeraceae;g__;s__
OTU10761	0.00185991	0.00265826	0.000281886	0.000217081	0.000202134	0	9.52358e-05	0.000185108	0	0	2.18384e-05	0	0	0	0	0	k__Bacteria	p__Planctomycetes	c__Planctomycetia	o__Gemmatales	f__Isosphaeraceae	g__	s__	1681404		k__Bacteria;p__Planctomycetes;c__Planctomycetia;o__Gemmatales;f__Isosphaeraceae;g__;s__
OTU4560	9.89315e-05	2.35244e-05	0.000151785	9.30348e-05	8.98372e-05	2.72138e-05	2.3809e-05	4.6277e-05	0	0	0	0	0	0	0	0	k__Bacteria	p__Planctomycetes	c__Planctomycetia	o__Gemmatales	f__Isosphaeraceae	g__	s__	1072157		k__Bacteria;p__Planctomycetes;c__Planctomycetia;o__Gemmatales;f__Isosphaeraceae;g__;s__
OTU11038	0	7.05733e-05	4.3367e-05	0	4.49186e-05	8.16415e-05	0.000119045	2.31385e-05	0	0	0	0	0	0	0	1.83496e-05	k__Bacteria	p__Planctomycetes	c__Planctomycetia	o__Gemmatales	f__Isosphaeraceae	g__	s__	1052283		k__Bacteria;p__Planctomycetes;c__Planctomycetia;o__Gemmatales;f__Isosphaeraceae;g__;s__
OTU7349	1.97863e-05	0.000117622	6.50505e-05	6.20232e-05	8.98372e-05	8.16415e-05	0.000166663	0.000208247	0	2.69027e-05	8.73534e-05	0	4.8329e-05	0	0	1.83496e-05	k__Bacteria	p__Planctomycetes	c__Planctomycetia	o__Gemmatales	f__Isosphaeraceae	g__	s__	1027114		k__Bacteria;p__Planctomycetes;c__Planctomycetia;o__Gemmatales;f__Isosphaeraceae;g__;s__
OTU287	0.00015829	0.000376391	0.000238519	0.00018607	8.98372e-05	0.000136069	9.52358e-05	9.2554e-05	0	0	2.18384e-05	0	0	0	0	5.50489e-05	k__Bacteria	p__Planctomycetes	c__Planctomycetia	o__Gemmatales	f__Isosphaeraceae	g__	s__	1020633		k__Bacteria;p__Planctomycetes;c__Planctomycetia;o__Gemmatales;f__Isosphaeraceae;g__;s__
OTU3315	0.00124654	0.00136442	0.000715556	6.20232e-05	0.00031443	8.16415e-05	0.000547606	0.000393355	0	8.07081e-05	2.18384e-05	0	0	0	0	0	k__Bacteria	p__Planctomycetes	c__Planctomycetia	o__Gemmatales	f__Isosphaeraceae	g__	s__	1014513		k__Bacteria;p__Planctomycetes;c__Planctomycetia;o__Gemmatales;f__Isosphaeraceae;g__;s__
OTU5583	0.00104867	0.00131737	0.000607138	0.000806302	0.000381808	0.00035378	0.000547606	6.94155e-05	0	0	6.55151e-05	0	0	0	0	1.83496e-05	k__Bacteria	p__Planctomycetes	c__Planctomycetia	o__Gemmatales	f__Isosphaeraceae	g__	s__	972396		k__Bacteria;p__Planctomycetes;c__Planctomycetia;o__Gemmatales;f__Isosphaeraceae;g__;s__
OTU9101	3.95726e-05	2.35244e-05	6.50505e-05	3.10116e-05	6.73779e-05	5.44277e-05	4.76179e-05	4.6277e-05	0	0	0	0	0	0	0	0	k__Bacteria	p__Planctomycetes	c__Planctomycetia	o__Gemmatales	f__Isosphaeraceae	g__	s__	962630		k__Bacteria;p__Planctomycetes;c__Planctomycetia;o__Gemmatales;f__Isosphaeraceae;g__;s__
OTU2547	0.00015829	0.000117622	6.50505e-05	3.10116e-05	6.73779e-05	0.000108855	7.14269e-05	9.2554e-05	0	0	0	0	0	0	0	0	k__Bacteria	p__Planctomycetes	c__Planctomycetia	o__Gemmatales	f__Isosphaeraceae	g__	s__	951455		k__Bacteria;p__Planctomycetes;c__Planctomycetia;o__Gemmatales;f__Isosphaeraceae;g__;s__
OTU6071	7.91452e-05	0	6.50505e-05	3.10116e-05	4.49186e-05	0	7.14269e-05	0	0	0	0	0	0	0	0	0	k__Bacteria	p__Planctomycetes	c__Planctomycetia	o__Gemmatales	f__Isosphaeraceae	g__	s__	941127		k__Bacteria;p__Planctomycetes;c__Planctomycetia;o__Gemmatales;f__Isosphaeraceae;g__;s__
OTU5693	0.00122675	0.00131737	0.00119259	0.00220182	0.00101067	0.00146955	0.002119	0.0022213	0.00018456	0.000457346	0.000786181	0.000166698	0.000531619	0.000387817	0.000173495	0.00051379	k__Bacteria	p__Planctomycetes	c__Planctomycetia	o__Gemmatales	f__Isosphaeraceae	g__	s__	940630		k__Bacteria;p__Planctomycetes;c__Planctomycetia;o__Gemmatales;f__Isosphaeraceae;g__;s__
OTU2018	0.00172141	0.000376391	0.00121428	0.000558209	0.00289725	0.00214989	0.00283327	0.00182794	0.00110736	0.00145275	0.000939049	0.00114605	0.00152236	0.00162883	0.00106575	0.00214691	k__Bacteria	p__Planctomycetes	c__Planctomycetia	o__Gemmatales	f__Isosphaeraceae	g__	s__	868555		k__Bacteria;p__Planctomycetes;c__Planctomycetia;o__Gemmatales;f__Isosphaeraceae;g__;s__
OTU1726	9.89315e-05	0.000188195	8.6734e-05	0.000124046	2.24593e-05	2.72138e-05	2.3809e-05	9.2554e-05	0	0	0	0	0	0	0	0	k__Bacteria	p__Planctomycetes	c__Planctomycetia	o__Gemmatales	f__Isosphaeraceae	g__	s__	842108		k__Bacteria;p__Planctomycetes;c__Planctomycetia;o__Gemmatales;f__Isosphaeraceae;g__;s__
OTU9096	0.000356154	0.000141147	0.000108418	3.10116e-05	0	2.72138e-05	4.76179e-05	2.31385e-05	0	0	0	0	0	0	0	0	k__Bacteria	p__Planctomycetes	c__Planctomycetia	o__Gemmatales	f__Isosphaeraceae	g__	s__	801268		k__Bacteria;p__Planctomycetes;c__Planctomycetia;o__Gemmatales;f__Isosphaeraceae;g__;s__
OTU4253	0.000257222	2.35244e-05	0	3.10116e-05	2.24593e-05	8.16415e-05	9.52358e-05	2.31385e-05	0	0	0	0	0	0	0	1.83496e-05	k__Bacteria	p__Planctomycetes	c__Planctomycetia	o__Gemmatales	f__Isosphaeraceae	g__	s__	564911		k__Bacteria;p__Planctomycetes;c__Planctomycetia;o__Gemmatales;f__Isosphaeraceae;g__;s__
OTU5103	0.000217649	0.000282293	0.000173468	0.000558209	0.000561482	0.000326566	2.3809e-05	0.000277662	0.000158194	5.38054e-05	8.73534e-05	4.16745e-05	7.24935e-05	2.58545e-05	4.957e-05	9.17482e-05	k__Bacteria	p__Planctomycetes	c__Planctomycetia	o__Gemmatales	f__Isosphaeraceae	g__	s__	534735		k__Bacteria;p__Planctomycetes;c__Planctomycetia;o__Gemmatales;f__Isosphaeraceae;g__;s__
OTU3487	0	0	0	0.000806302	0.00107805	0.000489849	0.000642842	2.31385e-05	0	0	0	0	0	0	0	0	k__Bacteria	p__Planctomycetes	c__Planctomycetia	o__Gemmatales	f__Isosphaeraceae	g__	s__	249037		k__Bacteria;p__Planctomycetes;c__Planctomycetia;o__Gemmatales;f__Isosphaeraceae;g__;s__
OTU3108	0.000178077	0.000399915	0.000130101	0.000248093	0.000291971	0.000489849	0.000404752	0.000347078	0.00018456	0.000134513	0.000174707	6.25117e-05	0.000144987	5.1709e-05	7.4355e-05	9.17482e-05	k__Bacteria	p__Planctomycetes	c__Planctomycetia	o__Gemmatales	f__Isosphaeraceae	g__	s__	227534		k__Bacteria;p__Planctomycetes;c__Planctomycetia;o__Gemmatales;f__Isosphaeraceae;g__;s__
OTU895	0.000336367	2.35244e-05	2.16835e-05	0.000434162	0.000471645	0.000190497	0.000333325	0.000370216	0	0	0	0	2.41645e-05	2.58545e-05	2.4785e-05	0	k__Bacteria	p__Planctomycetes	c__Planctomycetia	o__Gemmatales	f__Isosphaeraceae	g__	s__	220676		k__Bacteria;p__Planctomycetes;c__Planctomycetia;o__Gemmatales;f__Isosphaeraceae;g__;s__
OTU1683	5.93589e-05	0.000494013	8.6734e-05	0	2.24593e-05	0	4.76179e-05	9.2554e-05	0	0	0	0	0	0	0	0	k__Bacteria	p__Planctomycetes	c__Planctomycetia	o__Gemmatales	f__Isosphaeraceae	g__	s__	186517		k__Bacteria;p__Planctomycetes;c__Planctomycetia;o__Gemmatales;f__Isosphaeraceae;g__;s__
OTU9874	0.000474871	0.000588111	0.000997441	0.00164361	0.00128018	0.00152398	0.00164282	0.00122634	0.000290023	0.000833983	0.000480444	0.00022921	0.00123239	0.000180981	0.00019828	0.00051379	k__Bacteria	p__Planctomycetes	c__Planctomycetia	o__Gemmatales	f__Isosphaeraceae	g__	s__	51778		k__Bacteria;p__Planctomycetes;c__Planctomycetia;o__Gemmatales;f__Isosphaeraceae;g__;s__
OTU12026	0	2.35244e-05	2.16835e-05	3.10116e-05	0.000247052	2.72138e-05	0.000119045	2.31385e-05	0	0	0	0	0	0	0	1.83496e-05	k__Bacteria	p__Planctomycetes	c__Planctomycetia	o__Pirellulales	f__Pirellulaceae	g__	s__	New.ReferenceOTU836		k__Bacteria;p__Planctomycetes;c__Planctomycetia;o__Pirellulales;f__Pirellulaceae;g__;s__
OTU12290	0	2.35244e-05	4.3367e-05	3.10116e-05	0.000381808	0.000108855	0.000285707	0.000115693	0	2.69027e-05	0	0	0	0	0	3.66993e-05	k__Bacteria	p__Planctomycetes	c__Planctomycetia	o__Pirellulales	f__Pirellulaceae	g__	s__	New.ReferenceOTU821		k__Bacteria;p__Planctomycetes;c__Planctomycetia;o__Pirellulales;f__Pirellulaceae;g__;s__
OTU11682	5.93589e-05	0.000188195	0.000390303	0.00096136	0.000426727	0.000979698	0.000619033	0.000786709	0	0	0	0	0	0	0	0	k__Bacteria	p__Planctomycetes	c__Planctomycetia	o__Pirellulales	f__Pirellulaceae	g__	s__	New.ReferenceOTU581		k__Bacteria;p__Planctomycetes;c__Planctomycetia;o__Pirellulales;f__Pirellulaceae;g__;s__
OTU12001	0.000237436	9.40977e-05	2.16835e-05	3.10116e-05	0.000336889	5.44277e-05	0.000333325	0.000138831	0	2.69027e-05	0	0	0	2.58545e-05	0	1.83496e-05	k__Bacteria	p__Planctomycetes	c__Planctomycetia	o__Pirellulales	f__Pirellulaceae	g__	s__	New.ReferenceOTU285		k__Bacteria;p__Planctomycetes;c__Planctomycetia;o__Pirellulales;f__Pirellulaceae;g__;s__
OTU11790	1.97863e-05	4.70489e-05	0.000151785	0.000558209	0.000606401	0.00106134	0.000928549	0.00101809	0	0.000188319	0.000109192	2.08372e-05	4.8329e-05	7.75635e-05	0	9.17482e-05	k__Bacteria	p__Planctomycetes	c__Planctomycetia	o__Pirellulales	f__Pirellulaceae	g__	s__	New.ReferenceOTU1144		k__Bacteria;p__Planctomycetes;c__Planctomycetia;o__Pirellulales;f__Pirellulaceae;g__;s__
OTU27500	1.97863e-05	0	0.000108418	0.000124046	4.49186e-05	0	0	4.6277e-05	0	0	0	0	0	0	0	0	k__Bacteria	p__Planctomycetes	c__Planctomycetia	o__Pirellulales	f__Pirellulaceae	g__	s__	New.CleanUp.ReferenceOTU94204		k__Bacteria;p__Planctomycetes;c__Planctomycetia;o__Pirellulales;f__Pirellulaceae;g__;s__
OTU57540	3.95726e-05	4.70489e-05	0.00036862	0.000713267	0.000359349	0.000163283	0.000285707	0.00141145	0	0	0	0	0	0	0	0	k__Bacteria	p__Planctomycetes	c__Planctomycetia	o__Pirellulales	f__Pirellulaceae	g__	s__	New.CleanUp.ReferenceOTU283272		k__Bacteria;p__Planctomycetes;c__Planctomycetia;o__Pirellulales;f__Pirellulaceae;g__;s__
OTU10292	0.000435299	0.000494013	0.000281886	0.00018607	2.24593e-05	0	2.3809e-05	0	0	2.69027e-05	0	0	0	0	0	0	k__Bacteria	p__Planctomycetes	c__Planctomycetia	o__Pirellulales	f__Pirellulaceae	g__	s__	4437174		k__Bacteria;p__Planctomycetes;c__Planctomycetia;o__Pirellulales;f__Pirellulaceae;g__;s__
OTU9984	5.93589e-05	9.40977e-05	0.000693872	0.000713267	6.73779e-05	0.000163283	0.000428561	0.00016197	0	0	0	0	0	0	0	0	k__Bacteria	p__Planctomycetes	c__Planctomycetia	o__Pirellulales	f__Pirellulaceae	g__	s__	692157		k__Bacteria;p__Planctomycetes;c__Planctomycetia;o__Pirellulales;f__Pirellulaceae;g__;s__
OTU1638	0.000138504	9.40977e-05	0.00121428	0.00058922	0.000471645	0.00141512	0.000333325	0.000532186	0	0.000134513	0	2.08372e-05	4.8329e-05	0	2.4785e-05	3.66993e-05	k__Bacteria	p__Planctomycetes	c__Planctomycetia	o__Pirellulales	f__Pirellulaceae	g__	s__	655207		k__Bacteria;p__Planctomycetes;c__Planctomycetia;o__Pirellulales;f__Pirellulaceae;g__;s__
OTU4199	1.97863e-05	0.00021172	0.000390303	0.000279104	0.000247052	5.44277e-05	0.000166663	0.000185108	0	8.07081e-05	6.55151e-05	0	2.41645e-05	5.1709e-05	2.4785e-05	9.17482e-05	k__Bacteria	p__Planctomycetes	c__Planctomycetia	o__Pirellulales	f__Pirellulaceae	g__	s__	583233		k__Bacteria;p__Planctomycetes;c__Planctomycetia;o__Pirellulales;f__Pirellulaceae;g__;s__
OTU5535	5.93589e-05	0	0.000108418	6.20232e-05	8.98372e-05	2.72138e-05	9.52358e-05	4.6277e-05	2.63657e-05	2.69027e-05	0	0	0	2.58545e-05	0	0	k__Bacteria	p__Planctomycetes	c__Planctomycetia	o__Pirellulales	f__Pirellulaceae	g__	s__	537953		k__Bacteria;p__Planctomycetes;c__Planctomycetia;o__Pirellulales;f__Pirellulaceae;g__;s__
OTU10626	0.000573803	0.000399915	0.000845657	0.000279104	0.00031443	0	0.000119045	0.000300801	0	0	0	0	0	0	0	0	k__Bacteria	p__Planctomycetes	c__Planctomycetia	o__Pirellulales	f__Pirellulaceae	g__	s__	320069		k__Bacteria;p__Planctomycetes;c__Planctomycetia;o__Pirellulales;f__Pirellulaceae;g__;s__
OTU8186	7.91452e-05	4.70489e-05	0.000130101	0.000124046	6.73779e-05	0	7.14269e-05	9.2554e-05	0	0	0	0	0	0	0	0	k__Bacteria	p__Planctomycetes	c__Planctomycetia	o__Pirellulales	f__Pirellulaceae	g__	s__	273690		k__Bacteria;p__Planctomycetes;c__Planctomycetia;o__Pirellulales;f__Pirellulaceae;g__;s__
OTU8782	3.95726e-05	2.35244e-05	0.000195152	0.000155058	4.49186e-05	0.000108855	4.76179e-05	4.6277e-05	0	0	0	0	0	0	2.4785e-05	0	k__Bacteria	p__Planctomycetes	c__Planctomycetia	o__Pirellulales	f__Pirellulaceae	g__	s__	226277		k__Bacteria;p__Planctomycetes;c__Planctomycetia;o__Pirellulales;f__Pirellulaceae;g__;s__
OTU613	0.000296795	2.35244e-05	0.000130101	9.30348e-05	0	0	0	0	0	2.69027e-05	0	0	0	0	0	0	k__Bacteria	p__Planctomycetes	c__Planctomycetia	o__Pirellulales	f__Pirellulaceae	g__	s__	219667		k__Bacteria;p__Planctomycetes;c__Planctomycetia;o__Pirellulales;f__Pirellulaceae;g__;s__
OTU34665	3.95726e-05	9.40977e-05	6.50505e-05	6.20232e-05	0.000112296	0.000136069	0.000142854	9.2554e-05	0	0	0	0	0	0	0	0	k__Bacteria	p__Planctomycetes	c__Planctomycetia	o__Pirellulales	f__Pirellulaceae	g__A17	s__	New.CleanUp.ReferenceOTU140999		k__Bacteria;p__Planctomycetes;c__Planctomycetia;o__Pirellulales;f__Pirellulaceae;g__A17;s__
OTU4318	0.000811239	0.00063516	0.000975758	0.000713267	0.000920831	0.000680346	0.00104759	0.000647878	5.27315e-05	0.000322832	0.000240222	2.08372e-05	2.41645e-05	5.1709e-05	4.957e-05	5.50489e-05	k__Bacteria	p__Planctomycetes	c__Planctomycetia	o__Pirellulales	f__Pirellulaceae	g__A17	s__	613333		k__Bacteria;p__Planctomycetes;c__Planctomycetia;o__Pirellulales;f__Pirellulaceae;g__A17;s__
OTU12302	3.95726e-05	4.70489e-05	0.000238519	0.000217081	0.000134756	2.72138e-05	0.000214281	0.000138831	0	5.38054e-05	0	0	0	0	0	0	k__Bacteria	p__Planctomycetes	c__Planctomycetia	o__Pirellulales	f__Pirellulaceae	g__Pirellula	s__	New.ReferenceOTU941		k__Bacteria;p__Planctomycetes;c__Planctomycetia;o__Pirellulales;f__Pirellulaceae;g__Pirellula;s__
OTU3678	0.000257222	0.000305818	0.000325253	0.00018607	0.000247052	0	0.000119045	0.000138831	2.63657e-05	0	0	0	0	0	0	0	k__Bacteria	p__Planctomycetes	c__Planctomycetia	o__Pirellulales	f__Pirellulaceae	g__Pirellula	s__	4337567		k__Bacteria;p__Planctomycetes;c__Planctomycetia;o__Pirellulales;f__Pirellulaceae;g__Pirellula;s__
OTU6121	0.000178077	0.00021172	0.000130101	0.000124046	8.98372e-05	0	2.3809e-05	2.31385e-05	0	0	0	0	0	0	0	0	k__Bacteria	p__Planctomycetes	c__Planctomycetia	o__Pirellulales	f__Pirellulaceae	g__Pirellula	s__	1119486		k__Bacteria;p__Planctomycetes;c__Planctomycetia;o__Pirellulales;f__Pirellulaceae;g__Pirellula;s__
OTU1807	0.000316581	0.000141147	0.000325253	0.000124046	2.24593e-05	5.44277e-05	7.14269e-05	4.6277e-05	0	0	0	0	0	0	0	0	k__Bacteria	p__Planctomycetes	c__Planctomycetia	o__Pirellulales	f__Pirellulaceae	g__Pirellula	s__	1106926		k__Bacteria;p__Planctomycetes;c__Planctomycetia;o__Pirellulales;f__Pirellulaceae;g__Pirellula;s__
OTU8466	5.93589e-05	4.70489e-05	0.000346936	0	0.000179674	0.000163283	7.14269e-05	0.000185108	0	5.38054e-05	0	0	0	0	0	1.83496e-05	k__Bacteria	p__Planctomycetes	c__Planctomycetia	o__Pirellulales	f__Pirellulaceae	g__Pirellula	s__	993307		k__Bacteria;p__Planctomycetes;c__Planctomycetia;o__Pirellulales;f__Pirellulaceae;g__Pirellula;s__
OTU8331	0.000277008	0.000541062	0.000520404	0.000124046	0	0	0	4.6277e-05	0	0	0	0	0	0	0	0	k__Bacteria	p__Planctomycetes	c__Planctomycetia	o__Pirellulales	f__Pirellulaceae	g__Pirellula	s__	355954		k__Bacteria;p__Planctomycetes;c__Planctomycetia;o__Pirellulales;f__Pirellulaceae;g__Pirellula;s__
OTU3389	0.00037594	0.000117622	0.000281886	3.10116e-05	4.49186e-05	0	9.52358e-05	2.31385e-05	0	0	0	0	0	0	0	0	k__Bacteria	p__Planctomycetes	c__Planctomycetia	o__Pirellulales	f__Pirellulaceae	g__Pirellula	s__	208708		k__Bacteria;p__Planctomycetes;c__Planctomycetia;o__Pirellulales;f__Pirellulaceae;g__Pirellula;s__
OTU23321	0.000831025	0.000893928	0.000108418	0.000713267	0.000157215	0.000163283	0.000190472	4.6277e-05	0	0	0.00013103	4.16745e-05	2.41645e-05	2.58545e-05	2.4785e-05	1.83496e-05	k__Bacteria	p__Planctomycetes	c__Planctomycetia	o__Planctomycetales	f__Planctomycetaceae	g__Planctomyces	s__	New.CleanUp.ReferenceOTU67109		k__Bacteria;p__Planctomycetes;c__Planctomycetia;o__Planctomycetales;f__Planctomycetaceae;g__Planctomyces;s__
OTU63718	0.000257222	0.000776306	0.000672189	0.000465174	0.000247052	0	0.000357134	0.000208247	0	0	0	0	0	0	0	0	k__Bacteria	p__Planctomycetes	c__Planctomycetia	o__Planctomycetales	f__Planctomycetaceae	g__Planctomyces	s__	New.CleanUp.ReferenceOTU322271		k__Bacteria;p__Planctomycetes;c__Planctomycetia;o__Planctomycetales;f__Planctomycetaceae;g__Planctomyces;s__
OTU42286	1.97863e-05	2.35244e-05	2.16835e-05	0.000155058	0.000179674	0.000244925	0.000190472	0.00016197	0	0	2.18384e-05	0	0	0	0	1.83496e-05	k__Bacteria	p__Planctomycetes	c__Planctomycetia	o__Planctomycetales	f__Planctomycetaceae	g__Planctomyces	s__	New.CleanUp.ReferenceOTU189489		k__Bacteria;p__Planctomycetes;c__Planctomycetia;o__Planctomycetales;f__Planctomycetaceae;g__Planctomyces;s__
OTU8540	0.00015829	0.000164671	4.3367e-05	0.000558209	0.000426727	0.000489849	0.000261899	0.000786709	2.63657e-05	0.000349735	0.00013103	4.16745e-05	7.24935e-05	5.1709e-05	0.000223065	1.83496e-05	k__Bacteria	p__Planctomycetes	c__Planctomycetia	o__Planctomycetales	f__Planctomycetaceae	g__Planctomyces	s__	4366264		k__Bacteria;p__Planctomycetes;c__Planctomycetia;o__Planctomycetales;f__Planctomycetaceae;g__Planctomyces;s__
OTU7135	1.97863e-05	0.00021172	0.000628822	0.000279104	2.24593e-05	0	4.76179e-05	0.000115693	0	0	0	0	0	0	0	0	k__Bacteria	p__Planctomycetes	c__Planctomycetia	o__Planctomycetales	f__Planctomycetaceae	g__Planctomyces	s__	983373		k__Bacteria;p__Planctomycetes;c__Planctomycetia;o__Planctomycetales;f__Planctomycetaceae;g__Planctomyces;s__
OTU4237	0.00015829	2.35244e-05	0.000758923	0.000837313	0.000359349	0.00141512	0.000880931	0.000717294	0.000131829	0.000376638	0.000240222	2.08372e-05	0.00026581	2.58545e-05	0.000223065	0.000422042	k__Bacteria	p__Planctomycetes	c__Planctomycetia	o__Planctomycetales	f__Planctomycetaceae	g__Planctomyces	s__	267819		k__Bacteria;p__Planctomycetes;c__Planctomycetia;o__Planctomycetales;f__Planctomycetaceae;g__Planctomyces;s__
OTU4781	0.000138504	4.70489e-05	0.000173468	9.30348e-05	0	2.72138e-05	2.3809e-05	4.6277e-05	0	0	0	0	0	0	0	0	k__Bacteria	p__Planctomycetes	c__Planctomycetia	o__Planctomycetales	f__Planctomycetaceae	g__Planctomyces	s__	105215		k__Bacteria;p__Planctomycetes;c__Planctomycetia;o__Planctomycetales;f__Planctomycetaceae;g__Planctomyces;s__
OTU8876	3.95726e-05	4.70489e-05	8.6734e-05	0.000434162	4.49186e-05	8.16415e-05	9.52358e-05	0.000832986	0	0	2.18384e-05	0	2.41645e-05	0	2.4785e-05	1.83496e-05	k__Bacteria	p__Planctomycetes	c__Planctomycetia	o__Planctomycetales	f__Planctomycetaceae	g__Planctomyces	s__	85331		k__Bacteria;p__Planctomycetes;c__Planctomycetia;o__Planctomycetales;f__Planctomycetaceae;g__Planctomyces;s__
OTU12193	3.95726e-05	2.35244e-05	0.000260202	0.00018607	0.000404267	0.000136069	0.000190472	0.00016197	0	0	0	0	0	0	0	1.83496e-05	k__Bacteria	p__Planctomycetes	c__vadinHA49	o__p04_C01	f__	g__	s__	New.ReferenceOTU1167		k__Bacteria;p__Planctomycetes;c__vadinHA49;o__p04_C01;f__;g__;s__
OTU57435	0	4.70489e-05	0	0	8.98372e-05	8.16415e-05	7.14269e-05	0.000185108	0	0	0	0	2.41645e-05	0	0	0	k__Bacteria	p__Planctomycetes	c__vadinHA49	o__p04_C01	f__	g__	s__	New.CleanUp.ReferenceOTU282685		k__Bacteria;p__Planctomycetes;c__vadinHA49;o__p04_C01;f__;g__;s__
OTU3926	7.91452e-05	0	0.000130101	6.20232e-05	0	0	2.3809e-05	0.000138831	0	0	0	0	0	0	0	0	k__Bacteria	p__Planctomycetes	c__vadinHA49	o__p04_C01	f__	g__	s__	215025		k__Bacteria;p__Planctomycetes;c__vadinHA49;o__p04_C01;f__;g__;s__
OTU8227	1.97863e-05	0.000141147	0.000260202	0.000217081	0.000112296	5.44277e-05	7.14269e-05	0.000138831	0	2.69027e-05	0	0	0	0	0	0	k__Bacteria	p__Proteobacteria	c__Alphaproteobacteria	o__	f__	g__	s__	210024		k__Bacteria;p__Proteobacteria;c__Alphaproteobacteria;o__;f__;g__;s__
OTU4814	3.95726e-05	4.70489e-05	8.6734e-05	0.000124046	4.49186e-05	5.44277e-05	9.52358e-05	0.00016197	0	0	0	2.08372e-05	0	0	0	0	k__Bacteria	p__Proteobacteria	c__Alphaproteobacteria	o__Caulobacterales	f__Caulobacteraceae	g__	s__	226283		k__Bacteria;p__Proteobacteria;c__Alphaproteobacteria;o__Caulobacterales;f__Caulobacteraceae;g__;s__
OTU638	9.89315e-05	0.000117622	0.000151785	0	2.24593e-05	2.72138e-05	0.000119045	2.31385e-05	0	2.69027e-05	0	0	0	0	0	0	k__Bacteria	p__Proteobacteria	c__Alphaproteobacteria	o__Caulobacterales	f__Caulobacteraceae	g__	s__	209762		k__Bacteria;p__Proteobacteria;c__Alphaproteobacteria;o__Caulobacterales;f__Caulobacteraceae;g__;s__
OTU1332	0.000217649	0.000399915	0.000346936	3.10116e-05	8.98372e-05	0.000108855	2.3809e-05	0.000115693	0.000105463	8.07081e-05	6.55151e-05	2.08372e-05	7.24935e-05	0.000155127	0	3.66993e-05	k__Bacteria	p__Proteobacteria	c__Alphaproteobacteria	o__Caulobacterales	f__Caulobacteraceae	g__Phenylobacterium	s__	4319933		k__Bacteria;p__Proteobacteria;c__Alphaproteobacteria;o__Caulobacterales;f__Caulobacteraceae;g__Phenylobacterium;s__
OTU6249	0.000118718	0.000682208	4.3367e-05	0.000403151	0.00130264	0.00122462	0.00102379	0.000509047	0.000131829	0.000457346	0.000545959	0.000125023	0	0.000284399	0.00014871	0.000311944	k__Bacteria	p__Proteobacteria	c__Alphaproteobacteria	o__Caulobacterales	f__Caulobacteraceae	g__Phenylobacterium	s__	1088618		k__Bacteria;p__Proteobacteria;c__Alphaproteobacteria;o__Caulobacterales;f__Caulobacteraceae;g__Phenylobacterium;s__
OTU2083	1.97863e-05	0.000141147	0.000303569	0.00018607	2.24593e-05	0.000163283	0.000285707	0.000185108	0	0	2.18384e-05	0	0	5.1709e-05	0	1.83496e-05	k__Bacteria	p__Proteobacteria	c__Alphaproteobacteria	o__Caulobacterales	f__Caulobacteraceae	g__Phenylobacterium	s__	855333		k__Bacteria;p__Proteobacteria;c__Alphaproteobacteria;o__Caulobacterales;f__Caulobacteraceae;g__Phenylobacterium;s__
OTU2056	0.00037594	0.00063516	6.50505e-05	0.000155058	0.000134756	0	9.52358e-05	4.6277e-05	0	2.69027e-05	0	0	0	0	0	0	k__Bacteria	p__Proteobacteria	c__Alphaproteobacteria	o__Caulobacterales	f__Caulobacteraceae	g__Phenylobacterium	s__	242829		k__Bacteria;p__Proteobacteria;c__Alphaproteobacteria;o__Caulobacterales;f__Caulobacteraceae;g__Phenylobacterium;s__
OTU63099	1.97863e-05	4.70489e-05	0.000151785	0	6.73779e-05	5.44277e-05	4.76179e-05	0	2.63657e-05	0	2.18384e-05	0	0	0	0	0	k__Bacteria	p__Proteobacteria	c__Alphaproteobacteria	o__Ellin329	f__	g__	s__	New.CleanUp.ReferenceOTU318444		k__Bacteria;p__Proteobacteria;c__Alphaproteobacteria;o__Ellin329;f__;g__;s__
OTU10681	0.000356154	0.000541062	0.00080229	0.000496186	0.00152723	0.000108855	0.000761887	0.000439632	0.00036912	0.000511151	0.000480444	0.000145861	0.000120823	0.000413672	9.914e-05	5.50489e-05	k__Bacteria	p__Proteobacteria	c__Alphaproteobacteria	o__Ellin329	f__	g__	s__	2679706		k__Bacteria;p__Proteobacteria;c__Alphaproteobacteria;o__Ellin329;f__;g__;s__
OTU11382	0	0.00021172	4.3367e-05	3.10116e-05	0.000381808	0.000571491	0.000404752	0.000138831	0	0	0	0	0	0	0	0	k__Bacteria	p__Proteobacteria	c__Alphaproteobacteria	o__Ellin329	f__	g__	s__	236676		k__Bacteria;p__Proteobacteria;c__Alphaproteobacteria;o__Ellin329;f__;g__;s__
OTU9621	0.000178077	9.40977e-05	0.000260202	0.00018607	0	0	0	6.94155e-05	0	0	0	0	0	2.58545e-05	2.4785e-05	0	k__Bacteria	p__Proteobacteria	c__Alphaproteobacteria	o__Ellin329	f__	g__	s__	225187		k__Bacteria;p__Proteobacteria;c__Alphaproteobacteria;o__Ellin329;f__;g__;s__
OTU7185	0.000217649	0.000541062	0.000346936	0.00018607	0.000426727	0.000217711	2.3809e-05	4.6277e-05	7.90972e-05	8.07081e-05	0.000109192	0	9.6658e-05	5.1709e-05	4.957e-05	0.000128447	k__Bacteria	p__Proteobacteria	c__Alphaproteobacteria	o__Ellin329	f__	g__	s__	215825		k__Bacteria;p__Proteobacteria;c__Alphaproteobacteria;o__Ellin329;f__;g__;s__
OTU1264	0.00104867	0.00112917	0.00153953	0.00139552	0.000853453	0.000625918	4.76179e-05	4.6277e-05	0.000105463	0.000242124	0.000174707	2.08372e-05	7.24935e-05	0.00023269	2.4785e-05	0.000165147	k__Bacteria	p__Proteobacteria	c__Alphaproteobacteria	o__Ellin329	f__	g__	s__	156154		k__Bacteria;p__Proteobacteria;c__Alphaproteobacteria;o__Ellin329;f__;g__;s__
OTU310	0.00015829	0.000305818	0.000151785	6.20232e-05	2.24593e-05	0	0	4.6277e-05	0	0	0	0	0	0	0	0	k__Bacteria	p__Proteobacteria	c__Alphaproteobacteria	o__Rhizobiales	f__	g__	s__	4366199		k__Bacteria;p__Proteobacteria;c__Alphaproteobacteria;o__Rhizobiales;f__;g__;s__
OTU782	7.91452e-05	4.70489e-05	0.000130101	6.20232e-05	4.49186e-05	0	4.76179e-05	0.00016197	0	0	0	0	0	0	0	0	k__Bacteria	p__Proteobacteria	c__Alphaproteobacteria	o__Rhizobiales	f__	g__	s__	814055		k__Bacteria;p__Proteobacteria;c__Alphaproteobacteria;o__Rhizobiales;f__;g__;s__
OTU11112	0.000257222	0.00021172	0.000281886	3.10116e-05	0	0	4.76179e-05	6.94155e-05	0	2.69027e-05	0	0	0	0	0	0	k__Bacteria	p__Proteobacteria	c__Alphaproteobacteria	o__Rhizobiales	f__	g__	s__	792078		k__Bacteria;p__Proteobacteria;c__Alphaproteobacteria;o__Rhizobiales;f__;g__;s__
OTU413	9.89315e-05	9.40977e-05	0.000130101	3.10116e-05	2.24593e-05	8.16415e-05	0.000261899	6.94155e-05	0	0	0	0	0	0	0	0	k__Bacteria	p__Proteobacteria	c__Alphaproteobacteria	o__Rhizobiales	f__	g__	s__	625652		k__Bacteria;p__Proteobacteria;c__Alphaproteobacteria;o__Rhizobiales;f__;g__;s__
OTU1178	0.00053423	2.35244e-05	2.16835e-05	0.000217081	4.49186e-05	0	0	2.31385e-05	0	0	0	0	0	0	0	0	k__Bacteria	p__Proteobacteria	c__Alphaproteobacteria	o__Rhizobiales	f__	g__	s__	588630		k__Bacteria;p__Proteobacteria;c__Alphaproteobacteria;o__Rhizobiales;f__;g__;s__
OTU2604	0.000336367	0.00021172	8.6734e-05	6.20232e-05	2.24593e-05	0	7.14269e-05	0	0	0	0	0	0	0	0	0	k__Bacteria	p__Proteobacteria	c__Alphaproteobacteria	o__Rhizobiales	f__	g__	s__	323929		k__Bacteria;p__Proteobacteria;c__Alphaproteobacteria;o__Rhizobiales;f__;g__;s__
OTU3752	5.93589e-05	2.35244e-05	0.00036862	3.10116e-05	0	0	4.76179e-05	2.31385e-05	0	2.69027e-05	0	0	0	2.58545e-05	0	5.50489e-05	k__Bacteria	p__Proteobacteria	c__Alphaproteobacteria	o__Rhizobiales	f__	g__	s__	280453		k__Bacteria;p__Proteobacteria;c__Alphaproteobacteria;o__Rhizobiales;f__;g__;s__
OTU3875	7.91452e-05	0.000164671	0.000151785	0.000124046	8.98372e-05	8.16415e-05	0.000119045	0.000277662	2.63657e-05	5.38054e-05	6.55151e-05	0	4.8329e-05	5.1709e-05	2.4785e-05	9.17482e-05	k__Bacteria	p__Proteobacteria	c__Alphaproteobacteria	o__Rhizobiales	f__	g__	s__	209579		k__Bacteria;p__Proteobacteria;c__Alphaproteobacteria;o__Rhizobiales;f__;g__;s__
OTU9366	0	4.70489e-05	0.000195152	6.20232e-05	6.73779e-05	5.44277e-05	2.3809e-05	0.000115693	0	0	0	0	0	0	0	0	k__Bacteria	p__Proteobacteria	c__Alphaproteobacteria	o__Rhizobiales	f__	g__	s__	208779		k__Bacteria;p__Proteobacteria;c__Alphaproteobacteria;o__Rhizobiales;f__;g__;s__
OTU11387	0.000969529	0.000870404	0.00036862	0.000341128	2.24593e-05	2.72138e-05	0.000119045	0.000138831	0	2.69027e-05	0	0	0	0	0	0	k__Bacteria	p__Proteobacteria	c__Alphaproteobacteria	o__Rhizobiales	f__	g__	s__	102924		k__Bacteria;p__Proteobacteria;c__Alphaproteobacteria;o__Rhizobiales;f__;g__;s__
OTU5101	5.93589e-05	7.05733e-05	0.000325253	6.20232e-05	0.000269512	0.000326566	0.000190472	0.000485909	0	0.000188319	0	2.08372e-05	0	5.1709e-05	0	7.33985e-05	k__Bacteria	p__Proteobacteria	c__Alphaproteobacteria	o__Rhizobiales	f__Beijerinckiaceae	g__	s__	4341460		k__Bacteria;p__Proteobacteria;c__Alphaproteobacteria;o__Rhizobiales;f__Beijerinckiaceae;g__;s__
OTU5649	9.89315e-05	0.0105625	0.0104298	0.021274	0.00222347	0.0068851	0.010214	0.0144153	0.000975533	0.000242124	0.00248957	0.000583443	0.000990745	0.0028957	0.00126403	0.00242215	k__Bacteria	p__Proteobacteria	c__Alphaproteobacteria	o__Rhizobiales	f__Bradyrhizobiaceae	g__	s__	4377104		k__Bacteria;p__Proteobacteria;c__Alphaproteobacteria;o__Rhizobiales;f__Bradyrhizobiaceae;g__;s__
OTU1531	0.000237436	0.000117622	0.000130101	0.000155058	2.24593e-05	0	4.76179e-05	0	0	0	0	0	0	0	0	0	k__Bacteria	p__Proteobacteria	c__Alphaproteobacteria	o__Rhizobiales	f__Bradyrhizobiaceae	g__	s__	877742		k__Bacteria;p__Proteobacteria;c__Alphaproteobacteria;o__Rhizobiales;f__Bradyrhizobiaceae;g__;s__
OTU6108	5.93589e-05	4.70489e-05	0.000238519	0.000248093	0.000471645	0.000380994	0.000642842	0.000370216	5.27315e-05	5.38054e-05	8.73534e-05	0	2.41645e-05	2.58545e-05	2.4785e-05	0.000110098	k__Bacteria	p__Proteobacteria	c__Alphaproteobacteria	o__Rhizobiales	f__Bradyrhizobiaceae	g__	s__	740317		k__Bacteria;p__Proteobacteria;c__Alphaproteobacteria;o__Rhizobiales;f__Bradyrhizobiaceae;g__;s__
OTU1441	0.000435299	0.000446964	0.000563771	0.000217081	0.00031443	0.000435422	0.000547606	0.000300801	2.63657e-05	0	0	0	0	2.58545e-05	2.4785e-05	0	k__Bacteria	p__Proteobacteria	c__Alphaproteobacteria	o__Rhizobiales	f__Bradyrhizobiaceae	g__	s__	147541		k__Bacteria;p__Proteobacteria;c__Alphaproteobacteria;o__Rhizobiales;f__Bradyrhizobiaceae;g__;s__
OTU11407	0.000415512	0.000329342	2.16835e-05	0.00018607	0	0	2.3809e-05	6.94155e-05	2.63657e-05	0	0	0	0	0	0	0	k__Bacteria	p__Proteobacteria	c__Alphaproteobacteria	o__Rhizobiales	f__Hyphomicrobiaceae	g__	s__	4467425		k__Bacteria;p__Proteobacteria;c__Alphaproteobacteria;o__Rhizobiales;f__Hyphomicrobiaceae;g__;s__
OTU2717	0.0031856	0.00338752	0.00470532	0.00300813	0.000561482	0.000299352	0.000999976	0.00141145	0	0	0	0	0	0	0	0	k__Bacteria	p__Proteobacteria	c__Alphaproteobacteria	o__Rhizobiales	f__Hyphomicrobiaceae	g__	s__	4424338		k__Bacteria;p__Proteobacteria;c__Alphaproteobacteria;o__Rhizobiales;f__Hyphomicrobiaceae;g__;s__
OTU805	0.00350218	0.0020231	0.000542088	6.20232e-05	2.24593e-05	5.44277e-05	9.52358e-05	0.00016197	0	0	0	0	2.41645e-05	0	2.4785e-05	0	k__Bacteria	p__Proteobacteria	c__Alphaproteobacteria	o__Rhizobiales	f__Hyphomicrobiaceae	g__	s__	4380522		k__Bacteria;p__Proteobacteria;c__Alphaproteobacteria;o__Rhizobiales;f__Hyphomicrobiaceae;g__;s__
OTU10350	0.000257222	0.000188195	0.000325253	0.000217081	2.24593e-05	0	7.14269e-05	0	0	5.38054e-05	0	0	0	0	0	0	k__Bacteria	p__Proteobacteria	c__Alphaproteobacteria	o__Rhizobiales	f__Hyphomicrobiaceae	g__	s__	4330207		k__Bacteria;p__Proteobacteria;c__Alphaproteobacteria;o__Rhizobiales;f__Hyphomicrobiaceae;g__;s__
OTU9387	0.000237436	0.000446964	0.000954074	0.00114743	0.000291971	0.000435422	0.00045237	0.000948679	5.27315e-05	0.000484248	0.000196545	4.16745e-05	0.000120823	0.000284399	9.914e-05	0.000128447	k__Bacteria	p__Proteobacteria	c__Alphaproteobacteria	o__Rhizobiales	f__Hyphomicrobiaceae	g__	s__	970359		k__Bacteria;p__Proteobacteria;c__Alphaproteobacteria;o__Rhizobiales;f__Hyphomicrobiaceae;g__;s__
OTU531	0.00015829	0.000164671	2.16835e-05	0	2.24593e-05	2.72138e-05	0.000166663	2.31385e-05	0	0	2.18384e-05	0	0	2.58545e-05	0	0	k__Bacteria	p__Proteobacteria	c__Alphaproteobacteria	o__Rhizobiales	f__Hyphomicrobiaceae	g__Hyphomicrobium	s__	513073		k__Bacteria;p__Proteobacteria;c__Alphaproteobacteria;o__Rhizobiales;f__Hyphomicrobiaceae;g__Hyphomicrobium;s__
OTU9396	0.000336367	4.70489e-05	0.000693872	0.000217081	2.24593e-05	0	0.000142854	6.94155e-05	0	0	0	0	0	0	0	0	k__Bacteria	p__Proteobacteria	c__Alphaproteobacteria	o__Rhizobiales	f__Hyphomicrobiaceae	g__Pedomicrobium	s__	4435098		k__Bacteria;p__Proteobacteria;c__Alphaproteobacteria;o__Rhizobiales;f__Hyphomicrobiaceae;g__Pedomicrobium;s__
OTU3082	0.000336367	0.000752782	0.000715556	0.000248093	0.00062886	0.000435422	0.00090474	0.000277662	0	0	4.36767e-05	0	2.41645e-05	7.75635e-05	0	0	k__Bacteria	p__Proteobacteria	c__Alphaproteobacteria	o__Rhizobiales	f__Hyphomicrobiaceae	g__Rhodoplanes	s__	4402900		k__Bacteria;p__Proteobacteria;c__Alphaproteobacteria;o__Rhizobiales;f__Hyphomicrobiaceae;g__Rhodoplanes;s__
OTU3823	1.97863e-05	2.35244e-05	2.16835e-05	0.000155058	0.000404267	5.44277e-05	9.52358e-05	0.000347078	0	0	0	0	0	0	0	0	k__Bacteria	p__Proteobacteria	c__Alphaproteobacteria	o__Rhizobiales	f__Hyphomicrobiaceae	g__Rhodoplanes	s__	4381363		k__Bacteria;p__Proteobacteria;c__Alphaproteobacteria;o__Rhizobiales;f__Hyphomicrobiaceae;g__Rhodoplanes;s__
OTU345	0.000356154	0.000376391	0.000715556	0.000558209	0.00094329	0.000489849	0.000619033	0.000763571	2.63657e-05	5.38054e-05	0	0	0	0	2.4785e-05	1.83496e-05	k__Bacteria	p__Proteobacteria	c__Alphaproteobacteria	o__Rhizobiales	f__Hyphomicrobiaceae	g__Rhodoplanes	s__	4363347		k__Bacteria;p__Proteobacteria;c__Alphaproteobacteria;o__Rhizobiales;f__Hyphomicrobiaceae;g__Rhodoplanes;s__
OTU1696	0.000257222	0.00150556	0.00359946	0.000651244	0.00660303	0.0124095	0.0125473	0.000509047	0.00123919	0.000591859	0.0010264	0.00127107	0.000797429	0.000439526	0.00136317	0.000385342	k__Bacteria	p__Proteobacteria	c__Alphaproteobacteria	o__Rhizobiales	f__Hyphomicrobiaceae	g__Rhodoplanes	s__	4342107		k__Bacteria;p__Proteobacteria;c__Alphaproteobacteria;o__Rhizobiales;f__Hyphomicrobiaceae;g__Rhodoplanes;s__
OTU8966	0.000237436	0.000305818	0.000195152	9.30348e-05	2.24593e-05	2.72138e-05	4.76179e-05	0.000185108	0	2.69027e-05	0	2.08372e-05	0	0	0	1.83496e-05	k__Bacteria	p__Proteobacteria	c__Alphaproteobacteria	o__Rhizobiales	f__Hyphomicrobiaceae	g__Rhodoplanes	s__	3984866		k__Bacteria;p__Proteobacteria;c__Alphaproteobacteria;o__Rhizobiales;f__Hyphomicrobiaceae;g__Rhodoplanes;s__
OTU2545	1.97863e-05	0.000141147	0.00036862	0.00058922	0.000539023	0	2.3809e-05	0.000323939	0	0	0	0	0	0	0	0	k__Bacteria	p__Proteobacteria	c__Alphaproteobacteria	o__Rhizobiales	f__Hyphomicrobiaceae	g__Rhodoplanes	s__	2706695		k__Bacteria;p__Proteobacteria;c__Alphaproteobacteria;o__Rhizobiales;f__Hyphomicrobiaceae;g__Rhodoplanes;s__
OTU5537	3.95726e-05	0.000164671	2.16835e-05	0.000341128	0.000718697	0.000435422	0.000738078	0.000347078	0	0.000134513	2.18384e-05	0	2.41645e-05	2.58545e-05	2.4785e-05	0	k__Bacteria	p__Proteobacteria	c__Alphaproteobacteria	o__Rhizobiales	f__Hyphomicrobiaceae	g__Rhodoplanes	s__	2375689		k__Bacteria;p__Proteobacteria;c__Alphaproteobacteria;o__Rhizobiales;f__Hyphomicrobiaceae;g__Rhodoplanes;s__
OTU4864	0.000138504	0	0.000108418	9.30348e-05	4.49186e-05	2.72138e-05	7.14269e-05	0	0	0	0	2.08372e-05	0	2.58545e-05	0	0	k__Bacteria	p__Proteobacteria	c__Alphaproteobacteria	o__Rhizobiales	f__Hyphomicrobiaceae	g__Rhodoplanes	s__	1638797		k__Bacteria;p__Proteobacteria;c__Alphaproteobacteria;o__Rhizobiales;f__Hyphomicrobiaceae;g__Rhodoplanes;s__
OTU3795	0.000178077	0.000141147	2.16835e-05	6.20232e-05	0.000404267	0	7.14269e-05	2.31385e-05	0	0	0	0	0	0	0	0	k__Bacteria	p__Proteobacteria	c__Alphaproteobacteria	o__Rhizobiales	f__Hyphomicrobiaceae	g__Rhodoplanes	s__	1144000		k__Bacteria;p__Proteobacteria;c__Alphaproteobacteria;o__Rhizobiales;f__Hyphomicrobiaceae;g__Rhodoplanes;s__
OTU349	0.000356154	0.000352866	0.000346936	9.30348e-05	0.000853453	0.00106134	0.000619033	4.6277e-05	0	0.000188319	0.000240222	2.08372e-05	0	0	4.957e-05	9.17482e-05	k__Bacteria	p__Proteobacteria	c__Alphaproteobacteria	o__Rhizobiales	f__Hyphomicrobiaceae	g__Rhodoplanes	s__	1125837		k__Bacteria;p__Proteobacteria;c__Alphaproteobacteria;o__Rhizobiales;f__Hyphomicrobiaceae;g__Rhodoplanes;s__
OTU7675	3.95726e-05	2.35244e-05	8.6734e-05	6.20232e-05	6.73779e-05	5.44277e-05	9.52358e-05	0.00016197	0	0	4.36767e-05	2.08372e-05	0	0	0	0	k__Bacteria	p__Proteobacteria	c__Alphaproteobacteria	o__Rhizobiales	f__Hyphomicrobiaceae	g__Rhodoplanes	s__	1109121		k__Bacteria;p__Proteobacteria;c__Alphaproteobacteria;o__Rhizobiales;f__Hyphomicrobiaceae;g__Rhodoplanes;s__
OTU7406	0.00015829	0.000141147	0.000108418	9.30348e-05	6.73779e-05	2.72138e-05	9.52358e-05	9.2554e-05	0	0	2.18384e-05	0	0	2.58545e-05	0	0	k__Bacteria	p__Proteobacteria	c__Alphaproteobacteria	o__Rhizobiales	f__Hyphomicrobiaceae	g__Rhodoplanes	s__	744505		k__Bacteria;p__Proteobacteria;c__Alphaproteobacteria;o__Rhizobiales;f__Hyphomicrobiaceae;g__Rhodoplanes;s__
OTU2382	0.000672734	9.40977e-05	0.000715556	0.000527197	0.00103313	0.000571491	0.000428561	0.000185108	0	0	0	0	0	0	2.4785e-05	0	k__Bacteria	p__Proteobacteria	c__Alphaproteobacteria	o__Rhizobiales	f__Hyphomicrobiaceae	g__Rhodoplanes	s__	657718		k__Bacteria;p__Proteobacteria;c__Alphaproteobacteria;o__Rhizobiales;f__Hyphomicrobiaceae;g__Rhodoplanes;s__
OTU4498	1.97863e-05	0.000164671	0.000346936	6.20232e-05	0.000247052	0.000244925	7.14269e-05	0.000138831	0	2.69027e-05	2.18384e-05	0	0	2.58545e-05	2.4785e-05	0	k__Bacteria	p__Proteobacteria	c__Alphaproteobacteria	o__Rhizobiales	f__Hyphomicrobiaceae	g__Rhodoplanes	s__	616682		k__Bacteria;p__Proteobacteria;c__Alphaproteobacteria;o__Rhizobiales;f__Hyphomicrobiaceae;g__Rhodoplanes;s__
OTU4187	5.93589e-05	0.000352866	0.000845657	0.00176766	0.00130264	0.00166004	0.00130949	0.00194363	5.27315e-05	0.000215222	0.000109192	0.000125023	0.000289974	2.58545e-05	9.914e-05	1.83496e-05	k__Bacteria	p__Proteobacteria	c__Alphaproteobacteria	o__Rhizobiales	f__Hyphomicrobiaceae	g__Rhodoplanes	s__	332042		k__Bacteria;p__Proteobacteria;c__Alphaproteobacteria;o__Rhizobiales;f__Hyphomicrobiaceae;g__Rhodoplanes;s__
OTU9793	5.93589e-05	0	6.50505e-05	0.00018607	4.49186e-05	0	4.76179e-05	0.000208247	0	2.69027e-05	0	0	0	0	0	0	k__Bacteria	p__Proteobacteria	c__Alphaproteobacteria	o__Rhizobiales	f__Hyphomicrobiaceae	g__Rhodoplanes	s__	316335		k__Bacteria;p__Proteobacteria;c__Alphaproteobacteria;o__Rhizobiales;f__Hyphomicrobiaceae;g__Rhodoplanes;s__
OTU6732	0.00160269	0.00101155	0.000281886	0.000837313	0.000202134	8.16415e-05	0.000261899	0.000832986	0	0	0	0	0	0	0	0	k__Bacteria	p__Proteobacteria	c__Alphaproteobacteria	o__Rhizobiales	f__Hyphomicrobiaceae	g__Rhodoplanes	s__	253167		k__Bacteria;p__Proteobacteria;c__Alphaproteobacteria;o__Rhizobiales;f__Hyphomicrobiaceae;g__Rhodoplanes;s__
OTU3002	0.00136526	0.00112917	0.000737239	0.00285307	0.00116788	0.000136069	0.000642842	0.00152714	0	0	0	0	0	0	0	0	k__Bacteria	p__Proteobacteria	c__Alphaproteobacteria	o__Rhizobiales	f__Hyphomicrobiaceae	g__Rhodoplanes	s__	248032		k__Bacteria;p__Proteobacteria;c__Alphaproteobacteria;o__Rhizobiales;f__Hyphomicrobiaceae;g__Rhodoplanes;s__
OTU9083	0.00176098	0.0028935	0.000563771	0.00772189	0.00366086	0.00206825	0.00302374	0.0040261	0	5.38054e-05	0	4.16745e-05	0	0	4.957e-05	0	k__Bacteria	p__Proteobacteria	c__Alphaproteobacteria	o__Rhizobiales	f__Hyphomicrobiaceae	g__Rhodoplanes	s__	215692		k__Bacteria;p__Proteobacteria;c__Alphaproteobacteria;o__Rhizobiales;f__Hyphomicrobiaceae;g__Rhodoplanes;s__
OTU9159	5.93589e-05	0.000517537	0.000715556	0.000651244	0.00062886	0.00212268	0.0013333	0.000740432	0	0.000161416	2.18384e-05	0	0	5.1709e-05	0	0.000110098	k__Bacteria	p__Proteobacteria	c__Alphaproteobacteria	o__Rhizobiales	f__Hyphomicrobiaceae	g__Rhodoplanes	s__	210428		k__Bacteria;p__Proteobacteria;c__Alphaproteobacteria;o__Rhizobiales;f__Hyphomicrobiaceae;g__Rhodoplanes;s__
OTU3888	1.97863e-05	0.000141147	6.50505e-05	9.30348e-05	8.98372e-05	0	0	0	0	0	0	0	0	0	0	0	k__Bacteria	p__Proteobacteria	c__Alphaproteobacteria	o__Rhizobiales	f__Hyphomicrobiaceae	g__Rhodoplanes	s__	208293		k__Bacteria;p__Proteobacteria;c__Alphaproteobacteria;o__Rhizobiales;f__Hyphomicrobiaceae;g__Rhodoplanes;s__
OTU4027	0.000237436	0.000258769	0.000477037	0.000217081	0.000291971	2.72138e-05	0.000190472	0.00016197	0	0	0	0	0	0	0	0	k__Bacteria	p__Proteobacteria	c__Alphaproteobacteria	o__Rhizobiales	f__Hyphomicrobiaceae	g__Rhodoplanes	s__	207216		k__Bacteria;p__Proteobacteria;c__Alphaproteobacteria;o__Rhizobiales;f__Hyphomicrobiaceae;g__Rhodoplanes;s__
OTU5699	0	0.000141147	8.6734e-05	9.30348e-05	4.49186e-05	0	2.3809e-05	0.000185108	0	0	0	0	0	0	0	0	k__Bacteria	p__Proteobacteria	c__Alphaproteobacteria	o__Rhizobiales	f__Hyphomicrobiaceae	g__Rhodoplanes	s__	144888		k__Bacteria;p__Proteobacteria;c__Alphaproteobacteria;o__Rhizobiales;f__Hyphomicrobiaceae;g__Rhodoplanes;s__
OTU7322	0.00162248	0.00152909	0.00589791	0.00660547	0.000539023	0.000517063	0.00126187	0.00657134	0	0	0	0	0	0	0	0	k__Bacteria	p__Proteobacteria	c__Alphaproteobacteria	o__Rhizobiales	f__Hyphomicrobiaceae	g__Rhodoplanes	s__	136162		k__Bacteria;p__Proteobacteria;c__Alphaproteobacteria;o__Rhizobiales;f__Hyphomicrobiaceae;g__Rhodoplanes;s__
OTU5812	0	0.000564586	0.000542088	6.20232e-05	0.000606401	0.00810973	0.000761887	0.000277662	2.63657e-05	5.38054e-05	0.000174707	0	0	5.1709e-05	0	1.83496e-05	k__Bacteria	p__Proteobacteria	c__Alphaproteobacteria	o__Rhizobiales	f__Hyphomicrobiaceae	g__Rhodoplanes	s__	134163		k__Bacteria;p__Proteobacteria;c__Alphaproteobacteria;o__Rhizobiales;f__Hyphomicrobiaceae;g__Rhodoplanes;s__
OTU7248	0.00308666	0.00230539	0.00169131	3.10116e-05	2.24593e-05	8.16415e-05	7.14269e-05	6.94155e-05	0	8.07081e-05	0	2.08372e-05	0	5.1709e-05	0	3.66993e-05	k__Bacteria	p__Proteobacteria	c__Alphaproteobacteria	o__Rhizobiales	f__Hyphomicrobiaceae	g__Rhodoplanes	s__	128192		k__Bacteria;p__Proteobacteria;c__Alphaproteobacteria;o__Rhizobiales;f__Hyphomicrobiaceae;g__Rhodoplanes;s__
OTU5789	0.00702414	0.000729257	0.00800121	0.0170254	0.00992701	0.00351059	0.000666651	0.00976445	5.27315e-05	0.00029593	2.18384e-05	0	2.41645e-05	7.75635e-05	4.957e-05	0	k__Bacteria	p__Proteobacteria	c__Alphaproteobacteria	o__Rhizobiales	f__Hyphomicrobiaceae	g__Rhodoplanes	s__	101542		k__Bacteria;p__Proteobacteria;c__Alphaproteobacteria;o__Rhizobiales;f__Hyphomicrobiaceae;g__Rhodoplanes;s__
OTU5429	0	2.35244e-05	0.000130101	0.000372139	0.000134756	0.000244925	0.000142854	0.000277662	0	5.38054e-05	2.18384e-05	8.3349e-05	2.41645e-05	2.58545e-05	7.4355e-05	0	k__Bacteria	p__Proteobacteria	c__Alphaproteobacteria	o__Rhizobiales	f__Hyphomicrobiaceae	g__Rhodoplanes	s__	53533		k__Bacteria;p__Proteobacteria;c__Alphaproteobacteria;o__Rhizobiales;f__Hyphomicrobiaceae;g__Rhodoplanes;s__
OTU11483	0.00015829	0.000141147	0.0015829	3.10116e-05	8.98372e-05	5.44277e-05	9.52358e-05	9.2554e-05	0	0	0	2.08372e-05	2.41645e-05	0	0	0	k__Bacteria	p__Proteobacteria	c__Alphaproteobacteria	o__Rhizobiales	f__Hyphomicrobiaceae	g__Rhodoplanes	s__	52053		k__Bacteria;p__Proteobacteria;c__Alphaproteobacteria;o__Rhizobiales;f__Hyphomicrobiaceae;g__Rhodoplanes;s__
OTU3466	0.000257222	0.000494013	0.000628822	0.000403151	0.000134756	0.00220432	0.000571415	0.000786709	0	0	6.55151e-05	2.08372e-05	0	5.1709e-05	0	0	k__Bacteria	p__Proteobacteria	c__Alphaproteobacteria	o__Rhizobiales	f__Methylocystaceae	g__	s__	1121839		k__Bacteria;p__Proteobacteria;c__Alphaproteobacteria;o__Rhizobiales;f__Methylocystaceae;g__;s__
OTU2973	1.97863e-05	0	0.000260202	0.00114743	0.000763616	5.44277e-05	0.000333325	0.000555324	0	0	0	0	0	0	0	0	k__Bacteria	p__Proteobacteria	c__Alphaproteobacteria	o__Rhizobiales	f__Methylocystaceae	g__Methylosinus	s__	4357886		k__Bacteria;p__Proteobacteria;c__Alphaproteobacteria;o__Rhizobiales;f__Methylocystaceae;g__Methylosinus;s__
OTU10686	0.000652948	0.000611635	0.000477037	0.000217081	0.00031443	0.000517063	0.000619033	0.000323939	0.000105463	0.000430443	0.00039309	4.16745e-05	2.41645e-05	0.000180981	9.914e-05	0.000238545	k__Bacteria	p__Proteobacteria	c__Alphaproteobacteria	o__Rhizobiales	f__Phyllobacteriaceae	g__	s__	1123592		k__Bacteria;p__Proteobacteria;c__Alphaproteobacteria;o__Rhizobiales;f__Phyllobacteriaceae;g__;s__
OTU11251	0.00124654	0.000141147	0.000737239	0.000837313	0.000359349	0	0.000166663	0.000393355	0	5.38054e-05	0	0	0	2.58545e-05	0	0	k__Bacteria	p__Proteobacteria	c__Alphaproteobacteria	o__Rhizobiales	f__Phyllobacteriaceae	g__	s__	570112		k__Bacteria;p__Proteobacteria;c__Alphaproteobacteria;o__Rhizobiales;f__Phyllobacteriaceae;g__;s__
OTU975	0	7.05733e-05	4.3367e-05	3.10116e-05	0.000404267	0.000244925	0.000333325	0.00016197	0	0	2.18384e-05	0	0	0	0	1.83496e-05	k__Bacteria	p__Proteobacteria	c__Alphaproteobacteria	o__Rhizobiales	f__Phyllobacteriaceae	g__Mesorhizobium	s__	795096		k__Bacteria;p__Proteobacteria;c__Alphaproteobacteria;o__Rhizobiales;f__Phyllobacteriaceae;g__Mesorhizobium;s__
OTU10398	0.000277008	0.00021172	0.000737239	3.10116e-05	0.000404267	0.000489849	0.000357134	9.2554e-05	5.27315e-05	0.000134513	2.18384e-05	2.08372e-05	0	5.1709e-05	0	0.000165147	k__Bacteria	p__Proteobacteria	c__Alphaproteobacteria	o__Rhizobiales	f__Rhizobiaceae	g__Rhizobium	s__	5364		k__Bacteria;p__Proteobacteria;c__Alphaproteobacteria;o__Rhizobiales;f__Rhizobiaceae;g__Rhizobium;s__
OTU92	0.000257222	0.000376391	0.000238519	0.000124046	0.000157215	0	4.76179e-05	2.31385e-05	0	0	0	0	0	0	0	0	k__Bacteria	p__Proteobacteria	c__Alphaproteobacteria	o__Rhizobiales	f__Rhodobiaceae	g__Afifella	s__	765676		k__Bacteria;p__Proteobacteria;c__Alphaproteobacteria;o__Rhizobiales;f__Rhodobiaceae;g__Afifella;s__
OTU7083	1.97863e-05	2.35244e-05	6.50505e-05	3.10116e-05	6.73779e-05	2.72138e-05	0.000142854	4.6277e-05	0	0	0	4.16745e-05	0	0	0	0	k__Bacteria	p__Proteobacteria	c__Alphaproteobacteria	o__Rhizobiales	f__Xanthobacteraceae	g__Labrys	s__	208637		k__Bacteria;p__Proteobacteria;c__Alphaproteobacteria;o__Rhizobiales;f__Xanthobacteraceae;g__Labrys;s__
OTU8085	9.89315e-05	9.40977e-05	0.000173468	0.00018607	0.000112296	5.44277e-05	0.000214281	9.2554e-05	0	0	0	2.08372e-05	0	0	0	3.66993e-05	k__Bacteria	p__Proteobacteria	c__Alphaproteobacteria	o__Rhizobiales	f__Xanthobacteraceae	g__Labrys	s__	99073		k__Bacteria;p__Proteobacteria;c__Alphaproteobacteria;o__Rhizobiales;f__Xanthobacteraceae;g__Labrys;s__
OTU3522	9.89315e-05	0.000564586	2.16835e-05	0.000248093	0.000157215	0	2.3809e-05	9.2554e-05	0	2.69027e-05	0	0	0	0	0	1.83496e-05	k__Bacteria	p__Proteobacteria	c__Alphaproteobacteria	o__Rhodobacterales	f__Hyphomonadaceae	g__	s__	2410340		k__Bacteria;p__Proteobacteria;c__Alphaproteobacteria;o__Rhodobacterales;f__Hyphomonadaceae;g__;s__
OTU11603	0	0	8.6734e-05	6.20232e-05	2.24593e-05	0	4.76179e-05	6.94155e-05	0	0	0	0	0	0	0	0	k__Bacteria	p__Proteobacteria	c__Alphaproteobacteria	o__Rhodospirillales	f__	g__	s__	New.ReferenceOTU138		k__Bacteria;p__Proteobacteria;c__Alphaproteobacteria;o__Rhodospirillales;f__;g__;s__
OTU66801	0	4.70489e-05	6.50505e-05	0.000217081	6.73779e-05	0	0	6.94155e-05	0	0	0	0	0	0	0	1.83496e-05	k__Bacteria	p__Proteobacteria	c__Alphaproteobacteria	o__Rhodospirillales	f__	g__	s__	New.CleanUp.ReferenceOTU342896		k__Bacteria;p__Proteobacteria;c__Alphaproteobacteria;o__Rhodospirillales;f__;g__;s__
OTU16328	0.000455085	0.00042344	0.000130101	0.000496186	4.49186e-05	0	0	0.000185108	0	0	0	0	0	0	0	0	k__Bacteria	p__Proteobacteria	c__Alphaproteobacteria	o__Rhodospirillales	f__	g__	s__	New.CleanUp.ReferenceOTU23646		k__Bacteria;p__Proteobacteria;c__Alphaproteobacteria;o__Rhodospirillales;f__;g__;s__
OTU5743	0.000732093	0.000258769	0.000108418	9.30348e-05	6.73779e-05	2.72138e-05	0.000119045	9.2554e-05	0	0	0	0	0	0	0	0	k__Bacteria	p__Proteobacteria	c__Alphaproteobacteria	o__Rhodospirillales	f__	g__	s__	4366499		k__Bacteria;p__Proteobacteria;c__Alphaproteobacteria;o__Rhodospirillales;f__;g__;s__
OTU2247	0.00498615	0.0028935	0.000195152	0.000248093	4.49186e-05	2.72138e-05	4.76179e-05	0	0	0	0	0	0	0	0	0	k__Bacteria	p__Proteobacteria	c__Alphaproteobacteria	o__Rhodospirillales	f__	g__	s__	955576		k__Bacteria;p__Proteobacteria;c__Alphaproteobacteria;o__Rhodospirillales;f__;g__;s__
OTU8767	9.89315e-05	0.000494013	0.000325253	0.000341128	6.73779e-05	0	0.000190472	9.2554e-05	0	5.38054e-05	0	0	0	0	0	1.83496e-05	k__Bacteria	p__Proteobacteria	c__Alphaproteobacteria	o__Rhodospirillales	f__	g__	s__	893232		k__Bacteria;p__Proteobacteria;c__Alphaproteobacteria;o__Rhodospirillales;f__;g__;s__
OTU820	0.00015829	9.40977e-05	0.000346936	0.000403151	0.000112296	0	0.000119045	2.31385e-05	0	0	0	0	0	0	0	0	k__Bacteria	p__Proteobacteria	c__Alphaproteobacteria	o__Rhodospirillales	f__	g__	s__	825452		k__Bacteria;p__Proteobacteria;c__Alphaproteobacteria;o__Rhodospirillales;f__;g__;s__
OTU10107	0.000277008	0.00021172	0.000151785	0.000341128	2.24593e-05	0	0	2.31385e-05	0	0	0	0	0	0	0	0	k__Bacteria	p__Proteobacteria	c__Alphaproteobacteria	o__Rhodospirillales	f__	g__	s__	342100		k__Bacteria;p__Proteobacteria;c__Alphaproteobacteria;o__Rhodospirillales;f__;g__;s__
OTU969	3.95726e-05	7.05733e-05	6.50505e-05	3.10116e-05	4.49186e-05	0	4.76179e-05	2.31385e-05	0	0	0	0	0	0	0	0	k__Bacteria	p__Proteobacteria	c__Alphaproteobacteria	o__Rhodospirillales	f__Acetobacteraceae	g__	s__	4388776		k__Bacteria;p__Proteobacteria;c__Alphaproteobacteria;o__Rhodospirillales;f__Acetobacteraceae;g__;s__
OTU2950	1.97863e-05	0.000658684	0.000715556	0.00105439	0.00123526	0.00166004	0.00180948	0.000671017	0	2.69027e-05	8.73534e-05	2.08372e-05	0	0	0	0	k__Bacteria	p__Proteobacteria	c__Alphaproteobacteria	o__Rhodospirillales	f__Acetobacteraceae	g__	s__	712222		k__Bacteria;p__Proteobacteria;c__Alphaproteobacteria;o__Rhodospirillales;f__Acetobacteraceae;g__;s__
OTU12025	0.0014444	0.00108212	0.000607138	0.000744278	0	0	7.14269e-05	0.000578463	0	0	0	0	0	0	0	0	k__Bacteria	p__Proteobacteria	c__Alphaproteobacteria	o__Rhodospirillales	f__Rhodospirillaceae	g__	s__	New.ReferenceOTU837		k__Bacteria;p__Proteobacteria;c__Alphaproteobacteria;o__Rhodospirillales;f__Rhodospirillaceae;g__;s__
OTU11879	0.000356154	0.000399915	8.6734e-05	3.10116e-05	0	0	2.3809e-05	0.000115693	0	0	0	0	0	0	0	0	k__Bacteria	p__Proteobacteria	c__Alphaproteobacteria	o__Rhodospirillales	f__Rhodospirillaceae	g__	s__	New.ReferenceOTU247		k__Bacteria;p__Proteobacteria;c__Alphaproteobacteria;o__Rhodospirillales;f__Rhodospirillaceae;g__;s__
OTU12105	0.000237436	0.00155261	0.000151785	6.20232e-05	0	0	0	2.31385e-05	0	0	0	0	0	0	0	0	k__Bacteria	p__Proteobacteria	c__Alphaproteobacteria	o__Rhodospirillales	f__Rhodospirillaceae	g__	s__	New.ReferenceOTU155		k__Bacteria;p__Proteobacteria;c__Alphaproteobacteria;o__Rhodospirillales;f__Rhodospirillaceae;g__;s__
OTU20376	0.000831025	0.000541062	0.000303569	0.000434162	0	0	0	0.000370216	0	0	0	0	0	0	0	0	k__Bacteria	p__Proteobacteria	c__Alphaproteobacteria	o__Rhodospirillales	f__Rhodospirillaceae	g__	s__	New.CleanUp.ReferenceOTU48605		k__Bacteria;p__Proteobacteria;c__Alphaproteobacteria;o__Rhodospirillales;f__Rhodospirillaceae;g__;s__
OTU61375	0.000514444	0.000846879	0.000455354	0.000248093	2.24593e-05	0	0	2.31385e-05	0	0	0	2.08372e-05	0	0	0	0	k__Bacteria	p__Proteobacteria	c__Alphaproteobacteria	o__Rhodospirillales	f__Rhodospirillaceae	g__	s__	New.CleanUp.ReferenceOTU307471		k__Bacteria;p__Proteobacteria;c__Alphaproteobacteria;o__Rhodospirillales;f__Rhodospirillaceae;g__;s__
OTU736	0	0.000164671	0.0024936	0.00458972	0.000336889	0.000163283	0.00121426	0.00166597	0	0	0	0	0	0	0	0	k__Bacteria	p__Proteobacteria	c__Alphaproteobacteria	o__Rhodospirillales	f__Rhodospirillaceae	g__	s__	4459144		k__Bacteria;p__Proteobacteria;c__Alphaproteobacteria;o__Rhodospirillales;f__Rhodospirillaceae;g__;s__
OTU8371	0.00108825	0.000870404	0.000303569	0.000124046	0	0	0	0.00016197	0	0	0	0	0	0	0	0	k__Bacteria	p__Proteobacteria	c__Alphaproteobacteria	o__Rhodospirillales	f__Rhodospirillaceae	g__	s__	4438018		k__Bacteria;p__Proteobacteria;c__Alphaproteobacteria;o__Rhodospirillales;f__Rhodospirillaceae;g__;s__
OTU2598	9.89315e-05	9.40977e-05	0.000130101	0.000124046	8.98372e-05	0	0	0	2.63657e-05	0	0	0	0	0	0	0	k__Bacteria	p__Proteobacteria	c__Alphaproteobacteria	o__Rhodospirillales	f__Rhodospirillaceae	g__	s__	4415558		k__Bacteria;p__Proteobacteria;c__Alphaproteobacteria;o__Rhodospirillales;f__Rhodospirillaceae;g__;s__
OTU931	1.97863e-05	0.000305818	0.000563771	0.000341128	6.73779e-05	2.72138e-05	0.000119045	0.000671017	2.63657e-05	0	0	0	2.41645e-05	0	0	0	k__Bacteria	p__Proteobacteria	c__Alphaproteobacteria	o__Rhodospirillales	f__Rhodospirillaceae	g__	s__	4398656		k__Bacteria;p__Proteobacteria;c__Alphaproteobacteria;o__Rhodospirillales;f__Rhodospirillaceae;g__;s__
OTU1792	1.97863e-05	9.40977e-05	6.50505e-05	3.10116e-05	0.000134756	0	0.000285707	0	0	0	0	0	0	0	0	0	k__Bacteria	p__Proteobacteria	c__Alphaproteobacteria	o__Rhodospirillales	f__Rhodospirillaceae	g__	s__	4395046		k__Bacteria;p__Proteobacteria;c__Alphaproteobacteria;o__Rhodospirillales;f__Rhodospirillaceae;g__;s__
OTU10909	0.000316581	0.000305818	0.000260202	9.30348e-05	6.73779e-05	5.44277e-05	2.3809e-05	2.31385e-05	0	0	0	0	0	0	0	0	k__Bacteria	p__Proteobacteria	c__Alphaproteobacteria	o__Rhodospirillales	f__Rhodospirillaceae	g__	s__	4306218		k__Bacteria;p__Proteobacteria;c__Alphaproteobacteria;o__Rhodospirillales;f__Rhodospirillaceae;g__;s__
OTU5810	9.89315e-05	0.00136442	0.000693872	0.000558209	0.000247052	0	9.52358e-05	0.000439632	0	0	0	2.08372e-05	0	0	0	0	k__Bacteria	p__Proteobacteria	c__Alphaproteobacteria	o__Rhodospirillales	f__Rhodospirillaceae	g__	s__	4302304		k__Bacteria;p__Proteobacteria;c__Alphaproteobacteria;o__Rhodospirillales;f__Rhodospirillaceae;g__;s__
OTU691	0	0	0.00110586	0.00254295	0.000112296	2.72138e-05	0.000809505	0.000832986	0	0	0	0	0	0	0	0	k__Bacteria	p__Proteobacteria	c__Alphaproteobacteria	o__Rhodospirillales	f__Rhodospirillaceae	g__	s__	4298129		k__Bacteria;p__Proteobacteria;c__Alphaproteobacteria;o__Rhodospirillales;f__Rhodospirillaceae;g__;s__
OTU2533	9.89315e-05	0.000682208	0.000325253	0.000155058	6.73779e-05	5.44277e-05	0.000214281	2.31385e-05	2.63657e-05	0.000188319	4.36767e-05	2.08372e-05	0	0.000155127	4.957e-05	0.000165147	k__Bacteria	p__Proteobacteria	c__Alphaproteobacteria	o__Rhodospirillales	f__Rhodospirillaceae	g__	s__	3412843		k__Bacteria;p__Proteobacteria;c__Alphaproteobacteria;o__Rhodospirillales;f__Rhodospirillaceae;g__;s__
OTU8052	1.97863e-05	0.000188195	0.00186478	0.00359735	0.00271757	0.000380994	0.00383324	0.00224444	0	0	0	0	0	0	0	0	k__Bacteria	p__Proteobacteria	c__Alphaproteobacteria	o__Rhodospirillales	f__Rhodospirillaceae	g__	s__	1142584		k__Bacteria;p__Proteobacteria;c__Alphaproteobacteria;o__Rhodospirillales;f__Rhodospirillaceae;g__;s__
OTU4407	0.00037594	0.000611635	0.000303569	0.000682255	0.000696238	8.16415e-05	0.000142854	0.000647878	0	0	0	0	0	0	0	0	k__Bacteria	p__Proteobacteria	c__Alphaproteobacteria	o__Rhodospirillales	f__Rhodospirillaceae	g__	s__	1136589		k__Bacteria;p__Proteobacteria;c__Alphaproteobacteria;o__Rhodospirillales;f__Rhodospirillaceae;g__;s__
OTU7165	7.91452e-05	0.000258769	0.000325253	0.00018607	0.000853453	0.000571491	0.000666651	6.94155e-05	0	0	0	0	0	0	0	0	k__Bacteria	p__Proteobacteria	c__Alphaproteobacteria	o__Rhodospirillales	f__Rhodospirillaceae	g__	s__	1135906		k__Bacteria;p__Proteobacteria;c__Alphaproteobacteria;o__Rhodospirillales;f__Rhodospirillaceae;g__;s__
OTU8458	5.93589e-05	7.05733e-05	2.16835e-05	0.000558209	0.000134756	2.72138e-05	0.000190472	9.2554e-05	0	0	0	0	0	0	0	0	k__Bacteria	p__Proteobacteria	c__Alphaproteobacteria	o__Rhodospirillales	f__Rhodospirillaceae	g__	s__	1126708		k__Bacteria;p__Proteobacteria;c__Alphaproteobacteria;o__Rhodospirillales;f__Rhodospirillaceae;g__;s__
OTU2833	0	0	2.16835e-05	6.20232e-05	4.49186e-05	0.00035378	7.14269e-05	4.6277e-05	0	0	0	0	0	0	0	0	k__Bacteria	p__Proteobacteria	c__Alphaproteobacteria	o__Rhodospirillales	f__Rhodospirillaceae	g__	s__	1113341		k__Bacteria;p__Proteobacteria;c__Alphaproteobacteria;o__Rhodospirillales;f__Rhodospirillaceae;g__;s__
OTU2589	0.00015829	0.000282293	0.000780606	0.00254295	0.000786075	0.000108855	0.000523797	0.00215188	0	0	0	0	0	0	0	0	k__Bacteria	p__Proteobacteria	c__Alphaproteobacteria	o__Rhodospirillales	f__Rhodospirillaceae	g__	s__	1105389		k__Bacteria;p__Proteobacteria;c__Alphaproteobacteria;o__Rhodospirillales;f__Rhodospirillaceae;g__;s__
OTU5986	0.000554017	0.000611635	0.000281886	0.000279104	0	0	0	0.000185108	0	0	0	0	0	0	0	0	k__Bacteria	p__Proteobacteria	c__Alphaproteobacteria	o__Rhodospirillales	f__Rhodospirillaceae	g__	s__	754039		k__Bacteria;p__Proteobacteria;c__Alphaproteobacteria;o__Rhodospirillales;f__Rhodospirillaceae;g__;s__
OTU9302	0	2.35244e-05	4.3367e-05	3.10116e-05	0.000494104	0.000489849	0.000285707	0.000115693	0	8.07081e-05	2.18384e-05	0	0	0	0	3.66993e-05	k__Bacteria	p__Proteobacteria	c__Alphaproteobacteria	o__Rhodospirillales	f__Rhodospirillaceae	g__	s__	749229		k__Bacteria;p__Proteobacteria;c__Alphaproteobacteria;o__Rhodospirillales;f__Rhodospirillaceae;g__;s__
OTU145	0.0038979	0.00294055	0.00136606	0.00204677	0.00278495	0.000653132	0.00109521	0.00131889	0.000105463	0.00029593	2.18384e-05	0.000145861	4.8329e-05	2.58545e-05	0.000173495	0.000238545	k__Bacteria	p__Proteobacteria	c__Alphaproteobacteria	o__Rhodospirillales	f__Rhodospirillaceae	g__	s__	709657		k__Bacteria;p__Proteobacteria;c__Alphaproteobacteria;o__Rhodospirillales;f__Rhodospirillaceae;g__;s__
OTU3279	0.000415512	0.000611635	0.00101912	0	6.73779e-05	0.000408208	2.3809e-05	2.31385e-05	0	0	2.18384e-05	0	0	0	0	0	k__Bacteria	p__Proteobacteria	c__Alphaproteobacteria	o__Rhodospirillales	f__Rhodospirillaceae	g__	s__	590727		k__Bacteria;p__Proteobacteria;c__Alphaproteobacteria;o__Rhodospirillales;f__Rhodospirillaceae;g__;s__
OTU8439	0.00015829	0.000117622	4.3367e-05	3.10116e-05	6.73779e-05	0	2.3809e-05	0	0	0	0	0	0	0	0	0	k__Bacteria	p__Proteobacteria	c__Alphaproteobacteria	o__Rhodospirillales	f__Rhodospirillaceae	g__	s__	576693		k__Bacteria;p__Proteobacteria;c__Alphaproteobacteria;o__Rhodospirillales;f__Rhodospirillaceae;g__;s__
OTU5732	0.00120696	0.00112917	0.000108418	0.000155058	0	0	0	2.31385e-05	0	0	0	0	0	0	0	0	k__Bacteria	p__Proteobacteria	c__Alphaproteobacteria	o__Rhodospirillales	f__Rhodospirillaceae	g__	s__	570812		k__Bacteria;p__Proteobacteria;c__Alphaproteobacteria;o__Rhodospirillales;f__Rhodospirillaceae;g__;s__
OTU744	0.00330431	0.00388153	0.000151785	0.00151957	0.000269512	2.72138e-05	0.000190472	6.94155e-05	0	0	0	0	2.41645e-05	0	0	0	k__Bacteria	p__Proteobacteria	c__Alphaproteobacteria	o__Rhodospirillales	f__Rhodospirillaceae	g__	s__	564004		k__Bacteria;p__Proteobacteria;c__Alphaproteobacteria;o__Rhodospirillales;f__Rhodospirillaceae;g__;s__
OTU11499	0.000672734	0.000188195	0.000455354	0.000496186	0.000381808	0.000136069	9.52358e-05	2.31385e-05	0	0	0	0	0	0	0	1.83496e-05	k__Bacteria	p__Proteobacteria	c__Alphaproteobacteria	o__Rhodospirillales	f__Rhodospirillaceae	g__	s__	369734		k__Bacteria;p__Proteobacteria;c__Alphaproteobacteria;o__Rhodospirillales;f__Rhodospirillaceae;g__;s__
OTU3958	0.00166205	0.00143499	0.000758923	0.0016126	0.000583942	0	0.000261899	0.0012032	0	2.69027e-05	0	4.16745e-05	0	2.58545e-05	2.4785e-05	1.83496e-05	k__Bacteria	p__Proteobacteria	c__Alphaproteobacteria	o__Rhodospirillales	f__Rhodospirillaceae	g__	s__	357011		k__Bacteria;p__Proteobacteria;c__Alphaproteobacteria;o__Rhodospirillales;f__Rhodospirillaceae;g__;s__
OTU5482	0.000217649	0.000352866	0.00162626	0.00145755	0.0013251	0.000108855	0.00123807	0.00148086	7.90972e-05	0.000134513	8.73534e-05	0.000125023	0.00026581	0.000129272	0.000123925	0.000201846	k__Bacteria	p__Proteobacteria	c__Alphaproteobacteria	o__Rhodospirillales	f__Rhodospirillaceae	g__	s__	331647		k__Bacteria;p__Proteobacteria;c__Alphaproteobacteria;o__Rhodospirillales;f__Rhodospirillaceae;g__;s__
OTU3326	7.91452e-05	0.000399915	0.000173468	9.30348e-05	2.24593e-05	0.000789202	0.00123807	0.000138831	5.27315e-05	5.38054e-05	2.18384e-05	0.000104186	7.24935e-05	5.1709e-05	0	1.83496e-05	k__Bacteria	p__Proteobacteria	c__Alphaproteobacteria	o__Rhodospirillales	f__Rhodospirillaceae	g__	s__	247794		k__Bacteria;p__Proteobacteria;c__Alphaproteobacteria;o__Rhodospirillales;f__Rhodospirillaceae;g__;s__
OTU841	0	0.000258769	0.000520404	0.000744278	0.000112296	0.000380994	0.000380943	2.31385e-05	0	0	0	6.25117e-05	0	0	0	0	k__Bacteria	p__Proteobacteria	c__Alphaproteobacteria	o__Rhodospirillales	f__Rhodospirillaceae	g__	s__	244994		k__Bacteria;p__Proteobacteria;c__Alphaproteobacteria;o__Rhodospirillales;f__Rhodospirillaceae;g__;s__
OTU8907	0.000138504	0.000399915	0.000303569	3.10116e-05	0	0	2.3809e-05	0.000115693	0	0	0	0	0	0	0	0	k__Bacteria	p__Proteobacteria	c__Alphaproteobacteria	o__Rhodospirillales	f__Rhodospirillaceae	g__	s__	227319		k__Bacteria;p__Proteobacteria;c__Alphaproteobacteria;o__Rhodospirillales;f__Rhodospirillaceae;g__;s__
OTU4616	0.000237436	2.35244e-05	0.000173468	0.000155058	6.73779e-05	2.72138e-05	2.3809e-05	9.2554e-05	0	0	0	0	0	0	0	0	k__Bacteria	p__Proteobacteria	c__Alphaproteobacteria	o__Rhodospirillales	f__Rhodospirillaceae	g__	s__	225546		k__Bacteria;p__Proteobacteria;c__Alphaproteobacteria;o__Rhodospirillales;f__Rhodospirillaceae;g__;s__
OTU5895	0.000277008	0.00134089	0.00344768	0.00983068	0.0076137	0.00421815	0.00938073	0.00455829	0	0	0	0	0	0	0	0	k__Bacteria	p__Proteobacteria	c__Alphaproteobacteria	o__Rhodospirillales	f__Rhodospirillaceae	g__	s__	225294		k__Bacteria;p__Proteobacteria;c__Alphaproteobacteria;o__Rhodospirillales;f__Rhodospirillaceae;g__;s__
OTU5963	0.000178077	0.000258769	0.000628822	0.000744278	0.000426727	5.44277e-05	0.000166663	0.000509047	0	0	0	0	0	0	0	0	k__Bacteria	p__Proteobacteria	c__Alphaproteobacteria	o__Rhodospirillales	f__Rhodospirillaceae	g__	s__	223020		k__Bacteria;p__Proteobacteria;c__Alphaproteobacteria;o__Rhodospirillales;f__Rhodospirillaceae;g__;s__
OTU5353	0.00162248	0.00263474	0.00179973	0.0069466	0.00334643	0.0015784	0.00269041	0.00293859	0	0.000215222	0	4.16745e-05	0.000144987	2.58545e-05	2.4785e-05	1.83496e-05	k__Bacteria	p__Proteobacteria	c__Alphaproteobacteria	o__Rhodospirillales	f__Rhodospirillaceae	g__	s__	212994		k__Bacteria;p__Proteobacteria;c__Alphaproteobacteria;o__Rhodospirillales;f__Rhodospirillaceae;g__;s__
OTU7433	3.95726e-05	9.40977e-05	0.000325253	6.20232e-05	0.000494104	0.000163283	0.00045237	0.000185108	0	0	0	0	0	0	0	7.33985e-05	k__Bacteria	p__Proteobacteria	c__Alphaproteobacteria	o__Rhodospirillales	f__Rhodospirillaceae	g__	s__	113710		k__Bacteria;p__Proteobacteria;c__Alphaproteobacteria;o__Rhodospirillales;f__Rhodospirillaceae;g__;s__
OTU181	0.000514444	0.000376391	0.000563771	6.20232e-05	0	0	4.76179e-05	0.000185108	0	2.69027e-05	0	0	0	0	0	0	k__Bacteria	p__Proteobacteria	c__Alphaproteobacteria	o__Sphingomonadales	f__Erythrobacteraceae	g__	s__	519510		k__Bacteria;p__Proteobacteria;c__Alphaproteobacteria;o__Sphingomonadales;f__Erythrobacteraceae;g__;s__
OTU7809	0.000138504	0.000164671	0.000151785	0.000124046	0.000157215	0	7.14269e-05	4.6277e-05	0	8.07081e-05	2.18384e-05	0	0	5.1709e-05	2.4785e-05	1.83496e-05	k__Bacteria	p__Proteobacteria	c__Alphaproteobacteria	o__Sphingomonadales	f__Sphingomonadaceae	g__	s__	4393057		k__Bacteria;p__Proteobacteria;c__Alphaproteobacteria;o__Sphingomonadales;f__Sphingomonadaceae;g__;s__
OTU111	0.000237436	0.000258769	0.000520404	0.000248093	0.000269512	2.72138e-05	0.000166663	0.000138831	0	0	0	0	0	0	0	0	k__Bacteria	p__Proteobacteria	c__Alphaproteobacteria	o__Sphingomonadales	f__Sphingomonadaceae	g__	s__	810096		k__Bacteria;p__Proteobacteria;c__Alphaproteobacteria;o__Sphingomonadales;f__Sphingomonadaceae;g__;s__
OTU7855	0.000435299	0.000329342	0.00242855	6.20232e-05	2.24593e-05	0.00204104	0.00692841	0.00217502	7.90972e-05	0.000161416	0.00013103	4.16745e-05	0	0.000103418	0	0.000440391	k__Bacteria	p__Proteobacteria	c__Alphaproteobacteria	o__Sphingomonadales	f__Sphingomonadaceae	g__Kaistobacter	s__	4447334		k__Bacteria;p__Proteobacteria;c__Alphaproteobacteria;o__Sphingomonadales;f__Sphingomonadaceae;g__Kaistobacter;s__
OTU9257	3.95726e-05	0.000188195	0.000130101	0.000279104	0.000606401	0.000598705	0.000880931	0.000185108	0	0	0	0	0	0	0	0	k__Bacteria	p__Proteobacteria	c__Alphaproteobacteria	o__Sphingomonadales	f__Sphingomonadaceae	g__Kaistobacter	s__	4437581		k__Bacteria;p__Proteobacteria;c__Alphaproteobacteria;o__Sphingomonadales;f__Sphingomonadaceae;g__Kaistobacter;s__
OTU6359	0.00267115	0.00275236	0.0014528	0.00378341	0.00168445	0.000136069	0.00123807	0.00127262	0	0	0	0	0	0	0	0	k__Bacteria	p__Proteobacteria	c__Alphaproteobacteria	o__Sphingomonadales	f__Sphingomonadaceae	g__Kaistobacter	s__	3937304		k__Bacteria;p__Proteobacteria;c__Alphaproteobacteria;o__Sphingomonadales;f__Sphingomonadaceae;g__Kaistobacter;s__
OTU1596	0	0.00042344	0.000108418	0	0.000830994	0.00454471	0.00511893	0.000138831	0	0	2.18384e-05	0	0	0	0	0	k__Bacteria	p__Proteobacteria	c__Alphaproteobacteria	o__Sphingomonadales	f__Sphingomonadaceae	g__Kaistobacter	s__	1787355		k__Bacteria;p__Proteobacteria;c__Alphaproteobacteria;o__Sphingomonadales;f__Sphingomonadaceae;g__Kaistobacter;s__
OTU10684	9.89315e-05	0.000141147	4.3367e-05	0.000434162	4.49186e-05	0	0	2.31385e-05	0	0	0	0	0	0	0	0	k__Bacteria	p__Proteobacteria	c__Alphaproteobacteria	o__Sphingomonadales	f__Sphingomonadaceae	g__Kaistobacter	s__	1094453		k__Bacteria;p__Proteobacteria;c__Alphaproteobacteria;o__Sphingomonadales;f__Sphingomonadaceae;g__Kaistobacter;s__
OTU3342	0	7.05733e-05	0.000151785	0.000124046	8.98372e-05	0.000462635	0.000190472	0.00016197	0	5.38054e-05	0	0	0	0	0	0	k__Bacteria	p__Proteobacteria	c__Alphaproteobacteria	o__Sphingomonadales	f__Sphingomonadaceae	g__Kaistobacter	s__	849863		k__Bacteria;p__Proteobacteria;c__Alphaproteobacteria;o__Sphingomonadales;f__Sphingomonadaceae;g__Kaistobacter;s__
OTU6989	1.97863e-05	0.000188195	2.16835e-05	3.10116e-05	2.24593e-05	0.000244925	0.000333325	0	0	2.69027e-05	0	0	0	0	0	0	k__Bacteria	p__Proteobacteria	c__Alphaproteobacteria	o__Sphingomonadales	f__Sphingomonadaceae	g__Kaistobacter	s__	824146		k__Bacteria;p__Proteobacteria;c__Alphaproteobacteria;o__Sphingomonadales;f__Sphingomonadaceae;g__Kaistobacter;s__
OTU1256	5.93589e-05	0.000164671	0.000346936	3.10116e-05	2.24593e-05	2.72138e-05	4.76179e-05	4.6277e-05	0	0	0	0	0	0	0	0	k__Bacteria	p__Proteobacteria	c__Alphaproteobacteria	o__Sphingomonadales	f__Sphingomonadaceae	g__Kaistobacter	s__	143386		k__Bacteria;p__Proteobacteria;c__Alphaproteobacteria;o__Sphingomonadales;f__Sphingomonadaceae;g__Kaistobacter;s__
OTU10521	0.000257222	0.000329342	0.000346936	0.000372139	0	2.72138e-05	2.3809e-05	0	0	2.69027e-05	2.18384e-05	0	0	0	2.4785e-05	1.83496e-05	k__Bacteria	p__Proteobacteria	c__Alphaproteobacteria	o__Sphingomonadales	f__Sphingomonadaceae	g__Sphingomonas	s__	240087		k__Bacteria;p__Proteobacteria;c__Alphaproteobacteria;o__Sphingomonadales;f__Sphingomonadaceae;g__Sphingomonas;s__
OTU11871	0.000633162	0.00108212	0.0019732	0.000248093	0	0.000435422	0.000309516	0.000532186	0	0	0	0	0	0	2.4785e-05	0	k__Bacteria	p__Proteobacteria	c__Betaproteobacteria	o__	f__	g__	s__	New.ReferenceOTU892		k__Bacteria;p__Proteobacteria;c__Betaproteobacteria;o__;f__;g__;s__
OTU11732	0.000316581	0.000588111	0.000520404	0.000217081	0	0	2.3809e-05	0	0	0	0	0	0	0	0	0	k__Bacteria	p__Proteobacteria	c__Betaproteobacteria	o__	f__	g__	s__	New.ReferenceOTU1086		k__Bacteria;p__Proteobacteria;c__Betaproteobacteria;o__;f__;g__;s__
OTU8308	0.000356154	0.00021172	0.000260202	0.000248093	6.73779e-05	0.000108855	7.14269e-05	6.94155e-05	0	2.69027e-05	0	0	0	0	0	0	k__Bacteria	p__Proteobacteria	c__Betaproteobacteria	o__	f__	g__	s__	3067471		k__Bacteria;p__Proteobacteria;c__Betaproteobacteria;o__;f__;g__;s__
OTU7970	0.000554017	0.00119975	0.000346936	6.20232e-05	0	0.000925271	0.000404752	0.000347078	0	0	0	0	0	0	0	0	k__Bacteria	p__Proteobacteria	c__Betaproteobacteria	o__	f__	g__	s__	1085127		k__Bacteria;p__Proteobacteria;c__Betaproteobacteria;o__;f__;g__;s__
OTU1168	0.000257222	0.00103507	0.000238519	0.000248093	8.98372e-05	5.44277e-05	2.3809e-05	2.31385e-05	0	0	0	0	0	0	0	0	k__Bacteria	p__Proteobacteria	c__Betaproteobacteria	o__	f__	g__	s__	805334		k__Bacteria;p__Proteobacteria;c__Betaproteobacteria;o__;f__;g__;s__
OTU9710	0.00154333	0.00176433	8.6734e-05	0.00077529	0.00031443	0.000217711	0.000357134	0.000300801	0	0.000134513	4.36767e-05	2.08372e-05	0	5.1709e-05	0	5.50489e-05	k__Bacteria	p__Proteobacteria	c__Betaproteobacteria	o__	f__	g__	s__	101884		k__Bacteria;p__Proteobacteria;c__Betaproteobacteria;o__;f__;g__;s__
OTU12067	0.000336367	0.000517537	0.00188647	0.00238789	0.000202134	0.00250367	0.0013333	0.00263779	0	0	0	0	0	0	0	0	k__Bacteria	p__Proteobacteria	c__Betaproteobacteria	o__A21b	f__EB1003	g__	s__	New.ReferenceOTU1040		k__Bacteria;p__Proteobacteria;c__Betaproteobacteria;o__A21b;f__EB1003;g__;s__
OTU35582	3.95726e-05	2.35244e-05	0.000108418	6.20232e-05	0	5.44277e-05	2.3809e-05	6.94155e-05	0	0	4.36767e-05	0	0	0	2.4785e-05	0	k__Bacteria	p__Proteobacteria	c__Betaproteobacteria	o__A21b	f__EB1003	g__	s__	New.CleanUp.ReferenceOTU146900		k__Bacteria;p__Proteobacteria;c__Betaproteobacteria;o__A21b;f__EB1003;g__;s__
OTU1721	3.95726e-05	9.40977e-05	0.00132269	0.00130249	0.000359349	5.44277e-05	0.000285707	0.00108751	0	0	0	0	0	0	0	0	k__Bacteria	p__Proteobacteria	c__Betaproteobacteria	o__A21b	f__EB1003	g__	s__	765189		k__Bacteria;p__Proteobacteria;c__Betaproteobacteria;o__A21b;f__EB1003;g__;s__
OTU7160	0.000435299	0.000305818	0.00201657	0.00151957	0.000516564	0	0.000547606	0.00118006	0	0	0	0	0	0	0	0	k__Bacteria	p__Proteobacteria	c__Betaproteobacteria	o__A21b	f__EB1003	g__	s__	541147		k__Bacteria;p__Proteobacteria;c__Betaproteobacteria;o__A21b;f__EB1003;g__;s__
OTU388	5.93589e-05	0.000305818	6.50505e-05	3.10116e-05	0.000112296	2.72138e-05	0	0.000323939	0	0	0	0	0	0	0	0	k__Bacteria	p__Proteobacteria	c__Betaproteobacteria	o__A21b	f__EB1003	g__	s__	538512		k__Bacteria;p__Proteobacteria;c__Betaproteobacteria;o__A21b;f__EB1003;g__;s__
OTU1928	1.97863e-05	0.00174081	0.0015829	3.10116e-05	0.000157215	0.00685789	0.000285707	0.006849	0	0	0	0	0	0	0	1.83496e-05	k__Bacteria	p__Proteobacteria	c__Betaproteobacteria	o__A21b	f__EB1003	g__	s__	215449		k__Bacteria;p__Proteobacteria;c__Betaproteobacteria;o__A21b;f__EB1003;g__;s__
OTU1528	0	0.000305818	0	6.20232e-05	0.000112296	0.000435422	2.3809e-05	2.31385e-05	0	0	0	0	0	0	0	0	k__Bacteria	p__Proteobacteria	c__Betaproteobacteria	o__A21b	f__EB1003	g__	s__	205058		k__Bacteria;p__Proteobacteria;c__Betaproteobacteria;o__A21b;f__EB1003;g__;s__
OTU1801	1.97863e-05	0.000917453	0.0014528	0.00058922	0.0025379	0.00228596	0.000499988	0.000832986	0	0	0	0	0	0	0	0	k__Bacteria	p__Proteobacteria	c__Betaproteobacteria	o__A21b	f__EB1003	g__	s__	102799		k__Bacteria;p__Proteobacteria;c__Betaproteobacteria;o__A21b;f__EB1003;g__;s__
OTU6945	0.00261179	0.000964502	0.000889024	0.000372139	2.24593e-05	0	0	0.00016197	0	0	0	0	0	0	0	0	k__Bacteria	p__Proteobacteria	c__Betaproteobacteria	o__Burkholderiales	f__Alcaligenaceae	g__	s__	114410		k__Bacteria;p__Proteobacteria;c__Betaproteobacteria;o__Burkholderiales;f__Alcaligenaceae;g__;s__
OTU10570	0	2.35244e-05	8.6734e-05	3.10116e-05	4.49186e-05	0.000108855	0.000285707	6.94155e-05	0	0	0	0	0	0	0	3.66993e-05	k__Bacteria	p__Proteobacteria	c__Betaproteobacteria	o__Burkholderiales	f__Burkholderiaceae	g__Burkholderia	s__	4346780		k__Bacteria;p__Proteobacteria;c__Betaproteobacteria;o__Burkholderiales;f__Burkholderiaceae;g__Burkholderia;s__
OTU5134	0.000435299	0.00216425	0	0.00018607	0.000786075	2.72138e-05	2.3809e-05	0	0	8.07081e-05	0	0	0	0	0	0	k__Bacteria	p__Proteobacteria	c__Betaproteobacteria	o__Burkholderiales	f__Burkholderiaceae	g__Burkholderia	s__	1105280		k__Bacteria;p__Proteobacteria;c__Betaproteobacteria;o__Burkholderiales;f__Burkholderiaceae;g__Burkholderia;s__
OTU10878	0.000138504	0	8.6734e-05	0.000155058	2.24593e-05	2.72138e-05	9.52358e-05	4.6277e-05	0	2.69027e-05	0	0	0	0	0	0	k__Bacteria	p__Proteobacteria	c__Betaproteobacteria	o__Burkholderiales	f__Comamonadaceae	g__	s__	4413439		k__Bacteria;p__Proteobacteria;c__Betaproteobacteria;o__Burkholderiales;f__Comamonadaceae;g__;s__
OTU3132	0.000138504	0.00021172	0.000542088	0.000403151	0.00031443	2.72138e-05	0.000261899	0.000254524	0	2.69027e-05	0	0.000187535	0	0	0	5.50489e-05	k__Bacteria	p__Proteobacteria	c__Betaproteobacteria	o__Burkholderiales	f__Comamonadaceae	g__	s__	4396454		k__Bacteria;p__Proteobacteria;c__Betaproteobacteria;o__Burkholderiales;f__Comamonadaceae;g__;s__
OTU3819	0.000692521	7.05733e-05	0.000823973	0.000434162	0.000112296	0.000299352	0.000642842	0.000740432	0	0.000107611	2.18384e-05	2.08372e-05	2.41645e-05	2.58545e-05	2.4785e-05	0.000110098	k__Bacteria	p__Proteobacteria	c__Betaproteobacteria	o__Burkholderiales	f__Comamonadaceae	g__	s__	4386631		k__Bacteria;p__Proteobacteria;c__Betaproteobacteria;o__Burkholderiales;f__Comamonadaceae;g__;s__
OTU4381	0.000118718	0.000258769	0.000737239	0.000465174	0.000134756	0.00138791	0.00069046	0.000717294	2.63657e-05	8.07081e-05	2.18384e-05	4.16745e-05	0	5.1709e-05	0	5.50489e-05	k__Bacteria	p__Proteobacteria	c__Betaproteobacteria	o__Burkholderiales	f__Comamonadaceae	g__	s__	1908796		k__Bacteria;p__Proteobacteria;c__Betaproteobacteria;o__Burkholderiales;f__Comamonadaceae;g__;s__
OTU5338	0.000138504	0.000588111	6.50505e-05	0.000248093	0.000494104	0.000380994	0.000166663	2.31385e-05	0	2.69027e-05	0	0	0	0	0	0	k__Bacteria	p__Proteobacteria	c__Betaproteobacteria	o__Burkholderiales	f__Comamonadaceae	g__	s__	1148345		k__Bacteria;p__Proteobacteria;c__Betaproteobacteria;o__Burkholderiales;f__Comamonadaceae;g__;s__
OTU2316	0.000415512	4.70489e-05	0.00110586	0.000124046	6.73779e-05	0	7.14269e-05	0	0	0	0	0	0	0	0	0	k__Bacteria	p__Proteobacteria	c__Betaproteobacteria	o__Burkholderiales	f__Comamonadaceae	g__	s__	819400		k__Bacteria;p__Proteobacteria;c__Betaproteobacteria;o__Burkholderiales;f__Comamonadaceae;g__;s__
OTU5157	0.00015829	7.05733e-05	0.000108418	6.20232e-05	2.24593e-05	0	2.3809e-05	2.31385e-05	0	0	0	2.08372e-05	2.41645e-05	2.58545e-05	2.4785e-05	1.83496e-05	k__Bacteria	p__Proteobacteria	c__Betaproteobacteria	o__Burkholderiales	f__Comamonadaceae	g__	s__	545997		k__Bacteria;p__Proteobacteria;c__Betaproteobacteria;o__Burkholderiales;f__Comamonadaceae;g__;s__
OTU2055	0.00126632	0.00101155	0.00214667	0.000155058	0.000763616	0.00035378	0.00157139	0.00171225	0.00018456	0.000457346	0.000676989	8.3349e-05	0.000193316	0.00074978	0.000223065	0.000697286	k__Bacteria	p__Proteobacteria	c__Betaproteobacteria	o__Burkholderiales	f__Comamonadaceae	g__	s__	336824		k__Bacteria;p__Proteobacteria;c__Betaproteobacteria;o__Burkholderiales;f__Comamonadaceae;g__;s__
OTU10348	3.95726e-05	0.000282293	0.000715556	0.000465174	0.000179674	8.16415e-05	0.000333325	0.000740432	0	0.000161416	4.36767e-05	2.08372e-05	0	2.58545e-05	4.957e-05	0.000128447	k__Bacteria	p__Proteobacteria	c__Betaproteobacteria	o__Burkholderiales	f__Comamonadaceae	g__	s__	210485		k__Bacteria;p__Proteobacteria;c__Betaproteobacteria;o__Burkholderiales;f__Comamonadaceae;g__;s__
OTU10351	5.93589e-05	0.000352866	2.16835e-05	0	0	8.16415e-05	7.14269e-05	6.94155e-05	0	0	0	0	0	0	0	0	k__Bacteria	p__Proteobacteria	c__Betaproteobacteria	o__Burkholderiales	f__Comamonadaceae	g__	s__	198096		k__Bacteria;p__Proteobacteria;c__Betaproteobacteria;o__Burkholderiales;f__Comamonadaceae;g__;s__
OTU4198	7.91452e-05	0.000164671	0.00036862	0.000124046	8.98372e-05	2.72138e-05	0.000166663	0.000300801	0	5.38054e-05	2.18384e-05	0	0	0	0	0	k__Bacteria	p__Proteobacteria	c__Betaproteobacteria	o__Burkholderiales	f__Comamonadaceae	g__	s__	136777		k__Bacteria;p__Proteobacteria;c__Betaproteobacteria;o__Burkholderiales;f__Comamonadaceae;g__;s__
OTU7751	0.000672734	0.000846879	0.000542088	0.000434162	2.24593e-05	0.000108855	0.000285707	0.000671017	0	0	2.18384e-05	0	0	0	0	0	k__Bacteria	p__Proteobacteria	c__Betaproteobacteria	o__Burkholderiales	f__Comamonadaceae	g__	s__	114102		k__Bacteria;p__Proteobacteria;c__Betaproteobacteria;o__Burkholderiales;f__Comamonadaceae;g__;s__
OTU9062	5.93589e-05	4.70489e-05	8.6734e-05	0	2.24593e-05	5.44277e-05	0.000190472	2.31385e-05	0	0	4.36767e-05	0	0	0	0	0	k__Bacteria	p__Proteobacteria	c__Betaproteobacteria	o__Burkholderiales	f__Oxalobacteraceae	g__	s__	831328		k__Bacteria;p__Proteobacteria;c__Betaproteobacteria;o__Burkholderiales;f__Oxalobacteraceae;g__;s__
OTU9461	1.97863e-05	0.00021172	0.000281886	0.000248093	6.73779e-05	0.000408208	0.000309516	4.6277e-05	0	8.07081e-05	0	0	0	0	0	0	k__Bacteria	p__Proteobacteria	c__Betaproteobacteria	o__Ellin6067	f__	g__	s__	1716466		k__Bacteria;p__Proteobacteria;c__Betaproteobacteria;o__Ellin6067;f__;g__;s__
OTU10386	0.000118718	7.05733e-05	0.000563771	6.20232e-05	8.98372e-05	0.00155119	0.000595224	0.000485909	0	2.69027e-05	0.000109192	0	0	0.000155127	7.4355e-05	7.33985e-05	k__Bacteria	p__Proteobacteria	c__Betaproteobacteria	o__Ellin6067	f__	g__	s__	1148005		k__Bacteria;p__Proteobacteria;c__Betaproteobacteria;o__Ellin6067;f__;g__;s__
OTU6902	0.0017412	0.000494013	4.3367e-05	0.000155058	0	5.44277e-05	2.3809e-05	6.94155e-05	0	0	0	0	0	0	0	0	k__Bacteria	p__Proteobacteria	c__Betaproteobacteria	o__Ellin6067	f__	g__	s__	1104782		k__Bacteria;p__Proteobacteria;c__Betaproteobacteria;o__Ellin6067;f__;g__;s__
OTU9338	0.000494658	0.000541062	0.000455354	0	0	2.72138e-05	2.3809e-05	6.94155e-05	0	0	0	0	0	0	0	0	k__Bacteria	p__Proteobacteria	c__Betaproteobacteria	o__Ellin6067	f__	g__	s__	698517		k__Bacteria;p__Proteobacteria;c__Betaproteobacteria;o__Ellin6067;f__;g__;s__
OTU2049	0.00015829	0.000141147	0.000303569	0	4.49186e-05	2.72138e-05	0.000142854	2.31385e-05	0	0	0	0	0	0	0	0	k__Bacteria	p__Proteobacteria	c__Betaproteobacteria	o__Ellin6067	f__	g__	s__	591340		k__Bacteria;p__Proteobacteria;c__Betaproteobacteria;o__Ellin6067;f__;g__;s__
OTU3807	0.000296795	0.00042344	0.000715556	0.000155058	0	0	0.000119045	0.000601601	0	0	0	0	0	0	0	0	k__Bacteria	p__Proteobacteria	c__Betaproteobacteria	o__Ellin6067	f__	g__	s__	206609		k__Bacteria;p__Proteobacteria;c__Betaproteobacteria;o__Ellin6067;f__;g__;s__
OTU6313	0.000316581	0.00021172	0.000130101	0.000279104	0.000247052	0.000653132	7.14269e-05	0.000601601	0	0.000376638	0	0	0	0.000129272	0	1.83496e-05	k__Bacteria	p__Proteobacteria	c__Betaproteobacteria	o__Ellin6067	f__	g__	s__	114209		k__Bacteria;p__Proteobacteria;c__Betaproteobacteria;o__Ellin6067;f__;g__;s__
OTU79	0.000356154	0.000682208	0.000758923	0.000434162	2.24593e-05	0.00070756	0.000190472	0.000323939	0	5.38054e-05	0.000109192	0	0	2.58545e-05	7.4355e-05	0	k__Bacteria	p__Proteobacteria	c__Betaproteobacteria	o__Ellin6067	f__	g__	s__	113577		k__Bacteria;p__Proteobacteria;c__Betaproteobacteria;o__Ellin6067;f__;g__;s__
OTU7961	0.000277008	9.40977e-05	4.3367e-05	0.000155058	0.000179674	0	2.3809e-05	9.2554e-05	0	0	0	0	0	0	0	0	k__Bacteria	p__Proteobacteria	c__Betaproteobacteria	o__MND1	f__	g__	s__	4393265		k__Bacteria;p__Proteobacteria;c__Betaproteobacteria;o__MND1;f__;g__;s__
OTU10068	1.97863e-05	4.70489e-05	2.16835e-05	0	6.73779e-05	8.16415e-05	0.000119045	2.31385e-05	0	0	0	0	0	0	0	0	k__Bacteria	p__Proteobacteria	c__Betaproteobacteria	o__MND1	f__	g__	s__	219551		k__Bacteria;p__Proteobacteria;c__Betaproteobacteria;o__MND1;f__;g__;s__
OTU1628	0.000415512	0.000141147	0.000932391	3.10116e-05	0	0	4.76179e-05	0.00016197	0	0	0	0	0	0	0	0	k__Bacteria	p__Proteobacteria	c__Betaproteobacteria	o__MND1	f__	g__	s__	208645		k__Bacteria;p__Proteobacteria;c__Betaproteobacteria;o__MND1;f__;g__;s__
OTU868	5.93589e-05	2.35244e-05	4.3367e-05	0	0	5.44277e-05	0.000142854	0	0	0	0	0	0	0	0	0	k__Bacteria	p__Proteobacteria	c__Betaproteobacteria	o__Rhodocyclales	f__Rhodocyclaceae	g__	s__	206296		k__Bacteria;p__Proteobacteria;c__Betaproteobacteria;o__Rhodocyclales;f__Rhodocyclaceae;g__;s__
OTU2715	3.95726e-05	0.000117622	0	0	0.000134756	0.000571491	0.000142854	0	0	0	0	0	0	0	0	0	k__Bacteria	p__Proteobacteria	c__Betaproteobacteria	o__SBla14	f__	g__	s__	4473935		k__Bacteria;p__Proteobacteria;c__Betaproteobacteria;o__SBla14;f__;g__;s__
OTU12172	0.000118718	0.000164671	6.50505e-05	0.000124046	6.73779e-05	0	7.14269e-05	0.000138831	0	0	0	0	0	0	0	0	k__Bacteria	p__Proteobacteria	c__Betaproteobacteria	o__SC-I-84	f__	g__	s__	New.ReferenceOTU888		k__Bacteria;p__Proteobacteria;c__Betaproteobacteria;o__SC-I-84;f__;g__;s__
OTU12093	0.000613376	2.35244e-05	0.000195152	6.20232e-05	0	0	0	4.6277e-05	0	0	0	0	0	0	0	0	k__Bacteria	p__Proteobacteria	c__Betaproteobacteria	o__SC-I-84	f__	g__	s__	New.ReferenceOTU662		k__Bacteria;p__Proteobacteria;c__Betaproteobacteria;o__SC-I-84;f__;g__;s__
OTU12132	7.91452e-05	9.40977e-05	4.3367e-05	3.10116e-05	2.24593e-05	5.44277e-05	7.14269e-05	9.2554e-05	0	0	0	0	0	0	0	0	k__Bacteria	p__Proteobacteria	c__Betaproteobacteria	o__SC-I-84	f__	g__	s__	New.ReferenceOTU57		k__Bacteria;p__Proteobacteria;c__Betaproteobacteria;o__SC-I-84;f__;g__;s__
OTU11705	0.000138504	7.05733e-05	0.000195152	0.000155058	0	0.000108855	7.14269e-05	4.6277e-05	0	0	0	0	0	2.58545e-05	2.4785e-05	7.33985e-05	k__Bacteria	p__Proteobacteria	c__Betaproteobacteria	o__SC-I-84	f__	g__	s__	New.ReferenceOTU192		k__Bacteria;p__Proteobacteria;c__Betaproteobacteria;o__SC-I-84;f__;g__;s__
OTU11734	0.00037594	0.00063516	0.000173468	6.20232e-05	0	0	2.3809e-05	4.6277e-05	0	0	0	0	0	0	0	0	k__Bacteria	p__Proteobacteria	c__Betaproteobacteria	o__SC-I-84	f__	g__	s__	New.ReferenceOTU1080		k__Bacteria;p__Proteobacteria;c__Betaproteobacteria;o__SC-I-84;f__;g__;s__
OTU12333	9.89315e-05	9.40977e-05	0.000303569	0.000155058	6.73779e-05	2.72138e-05	0.000190472	0.000138831	0	2.69027e-05	2.18384e-05	0	0	7.75635e-05	0	0	k__Bacteria	p__Proteobacteria	c__Betaproteobacteria	o__SC-I-84	f__	g__	s__	New.ReferenceOTU1055		k__Bacteria;p__Proteobacteria;c__Betaproteobacteria;o__SC-I-84;f__;g__;s__
OTU12208	0.000336367	0.000399915	0.000238519	0.00207778	0.000359349	0.000108855	0.00090474	0.00340136	0	0	0	0	0	0	0	0	k__Bacteria	p__Proteobacteria	c__Betaproteobacteria	o__SC-I-84	f__	g__	s__	New.ReferenceOTU1016		k__Bacteria;p__Proteobacteria;c__Betaproteobacteria;o__SC-I-84;f__;g__;s__
OTU23795	0.00015829	9.40977e-05	8.6734e-05	0.000217081	0	0	0	6.94155e-05	0	0	0	0	0	0	0	0	k__Bacteria	p__Proteobacteria	c__Betaproteobacteria	o__SC-I-84	f__	g__	s__	New.CleanUp.ReferenceOTU70156		k__Bacteria;p__Proteobacteria;c__Betaproteobacteria;o__SC-I-84;f__;g__;s__
OTU63870	0.000712307	0.000188195	0.000238519	6.20232e-05	0	0	0	4.6277e-05	0	0	0	0	0	0	0	0	k__Bacteria	p__Proteobacteria	c__Betaproteobacteria	o__SC-I-84	f__	g__	s__	New.CleanUp.ReferenceOTU323235		k__Bacteria;p__Proteobacteria;c__Betaproteobacteria;o__SC-I-84;f__;g__;s__
OTU62758	0.000237436	9.40977e-05	6.50505e-05	3.10116e-05	2.24593e-05	2.72138e-05	4.76179e-05	0	0	0	0	0	0	0	0	0	k__Bacteria	p__Proteobacteria	c__Betaproteobacteria	o__SC-I-84	f__	g__	s__	New.CleanUp.ReferenceOTU316282		k__Bacteria;p__Proteobacteria;c__Betaproteobacteria;o__SC-I-84;f__;g__;s__
OTU15172	0.000415512	0.000446964	0.000542088	3.10116e-05	2.24593e-05	2.72138e-05	0	0.000254524	0	0	0	0	0	0	0	0	k__Bacteria	p__Proteobacteria	c__Betaproteobacteria	o__SC-I-84	f__	g__	s__	New.CleanUp.ReferenceOTU16739		k__Bacteria;p__Proteobacteria;c__Betaproteobacteria;o__SC-I-84;f__;g__;s__
OTU8006	0	7.05733e-05	4.3367e-05	0	0.000179674	0.000408208	0.00383324	0.000208247	0	0	2.18384e-05	0	0	0	0	0	k__Bacteria	p__Proteobacteria	c__Betaproteobacteria	o__SC-I-84	f__	g__	s__	4304723		k__Bacteria;p__Proteobacteria;c__Betaproteobacteria;o__SC-I-84;f__;g__;s__
OTU9243	0	0	4.3367e-05	6.20232e-05	8.98372e-05	0	0.000142854	4.6277e-05	0	0	0	0	0	0	0	0	k__Bacteria	p__Proteobacteria	c__Betaproteobacteria	o__SC-I-84	f__	g__	s__	3868277		k__Bacteria;p__Proteobacteria;c__Betaproteobacteria;o__SC-I-84;f__;g__;s__
OTU8812	0.000356154	0.000117622	8.6734e-05	9.30348e-05	2.24593e-05	0	0	6.94155e-05	0	0	0	0	0	0	2.4785e-05	0	k__Bacteria	p__Proteobacteria	c__Betaproteobacteria	o__SC-I-84	f__	g__	s__	1638581		k__Bacteria;p__Proteobacteria;c__Betaproteobacteria;o__SC-I-84;f__;g__;s__
OTU4302	0.000633162	0.00127032	2.16835e-05	0.00117844	0.00141494	0.000136069	0.000428561	0.000300801	0	0	0	0	0	0	2.4785e-05	0	k__Bacteria	p__Proteobacteria	c__Betaproteobacteria	o__SC-I-84	f__	g__	s__	758309		k__Bacteria;p__Proteobacteria;c__Betaproteobacteria;o__SC-I-84;f__;g__;s__
OTU8853	0.000237436	0.000494013	0.000997441	0.000744278	0.000381808	0.000408208	4.76179e-05	4.6277e-05	0	8.07081e-05	0	0	0	0	0	0	k__Bacteria	p__Proteobacteria	c__Betaproteobacteria	o__SC-I-84	f__	g__	s__	702276		k__Bacteria;p__Proteobacteria;c__Betaproteobacteria;o__SC-I-84;f__;g__;s__
OTU609	0.00015829	0.000964502	0.000390303	0.000155058	0	0	7.14269e-05	4.6277e-05	0	5.38054e-05	0	0	0	0	0	5.50489e-05	k__Bacteria	p__Proteobacteria	c__Betaproteobacteria	o__SC-I-84	f__	g__	s__	545121		k__Bacteria;p__Proteobacteria;c__Betaproteobacteria;o__SC-I-84;f__;g__;s__
OTU4947	0.000890384	0.000446964	0.000693872	3.10116e-05	0	0	2.3809e-05	0.000138831	0	0	0	0	0	0	0	0	k__Bacteria	p__Proteobacteria	c__Betaproteobacteria	o__SC-I-84	f__	g__	s__	514085		k__Bacteria;p__Proteobacteria;c__Betaproteobacteria;o__SC-I-84;f__;g__;s__
OTU5485	0.000771666	0.000446964	0.000455354	0.000155058	2.24593e-05	2.72138e-05	0	2.31385e-05	0	0	0	0	0	0	0	0	k__Bacteria	p__Proteobacteria	c__Betaproteobacteria	o__SC-I-84	f__	g__	s__	359864		k__Bacteria;p__Proteobacteria;c__Betaproteobacteria;o__SC-I-84;f__;g__;s__
OTU708	0.00366047	0.00310522	0.00140943	0.000372139	4.49186e-05	0	0	6.94155e-05	0	0	0	0	0	0	0	0	k__Bacteria	p__Proteobacteria	c__Betaproteobacteria	o__SC-I-84	f__	g__	s__	328181		k__Bacteria;p__Proteobacteria;c__Betaproteobacteria;o__SC-I-84;f__;g__;s__
OTU3086	0.00160269	0.00122327	0.00140943	0.000682255	0.000202134	0.00035378	0.000571415	0.00155028	0	5.38054e-05	0	0	0	0	0	0	k__Bacteria	p__Proteobacteria	c__Betaproteobacteria	o__SC-I-84	f__	g__	s__	279993		k__Bacteria;p__Proteobacteria;c__Betaproteobacteria;o__SC-I-84;f__;g__;s__
OTU6913	0.000118718	4.70489e-05	0.000130101	6.20232e-05	2.24593e-05	0	2.3809e-05	0	0	0	0	0	0	0	0	0	k__Bacteria	p__Proteobacteria	c__Betaproteobacteria	o__SC-I-84	f__	g__	s__	226880		k__Bacteria;p__Proteobacteria;c__Betaproteobacteria;o__SC-I-84;f__;g__;s__
OTU7163	0.000316581	0.000729257	0.00101912	0.00117844	0.000808535	5.44277e-05	0.000380943	0.000971817	0	5.38054e-05	6.55151e-05	0	0	0	0	1.83496e-05	k__Bacteria	p__Proteobacteria	c__Betaproteobacteria	o__SC-I-84	f__	g__	s__	224548		k__Bacteria;p__Proteobacteria;c__Betaproteobacteria;o__SC-I-84;f__;g__;s__
OTU9152	0.00120696	0.000282293	0.000628822	0.000279104	0.000202134	0.000217711	0.000285707	0.00016197	2.63657e-05	0.000134513	2.18384e-05	0	0	0	4.957e-05	3.66993e-05	k__Bacteria	p__Proteobacteria	c__Betaproteobacteria	o__SC-I-84	f__	g__	s__	216643		k__Bacteria;p__Proteobacteria;c__Betaproteobacteria;o__SC-I-84;f__;g__;s__
OTU10027	0.00239414	0.00171728	0.00106249	0.00018607	4.49186e-05	0.000108855	0.000166663	0.000115693	0	5.38054e-05	0	0	0	0	0	1.83496e-05	k__Bacteria	p__Proteobacteria	c__Betaproteobacteria	o__SC-I-84	f__	g__	s__	214977		k__Bacteria;p__Proteobacteria;c__Betaproteobacteria;o__SC-I-84;f__;g__;s__
OTU1741	3.95726e-05	7.05733e-05	0.000173468	9.30348e-05	0.000134756	0.000136069	0.000380943	0.000115693	0	0	0	0	0	0	0	0	k__Bacteria	p__Proteobacteria	c__Betaproteobacteria	o__SC-I-84	f__	g__	s__	208009		k__Bacteria;p__Proteobacteria;c__Betaproteobacteria;o__SC-I-84;f__;g__;s__
OTU7733	0.000178077	0.000141147	0.000390303	3.10116e-05	0.000471645	0.00223154	0.00169044	6.94155e-05	2.63657e-05	2.69027e-05	0.000152868	0	0	2.58545e-05	0	0.000110098	k__Bacteria	p__Proteobacteria	c__Betaproteobacteria	o__SC-I-84	f__	g__	s__	207320		k__Bacteria;p__Proteobacteria;c__Betaproteobacteria;o__SC-I-84;f__;g__;s__
OTU6693	0.00338346	0.000258769	8.6734e-05	0	0	2.72138e-05	4.76179e-05	9.2554e-05	0	8.07081e-05	0	0	0	0	0	0	k__Bacteria	p__Proteobacteria	c__Betaproteobacteria	o__SC-I-84	f__	g__	s__	207133		k__Bacteria;p__Proteobacteria;c__Betaproteobacteria;o__SC-I-84;f__;g__;s__
OTU4343	0.000257222	7.05733e-05	0.000281886	0.00018607	2.24593e-05	0.000190497	0	0.000208247	5.27315e-05	8.07081e-05	0	0	0	0.00023269	4.957e-05	5.50489e-05	k__Bacteria	p__Proteobacteria	c__Betaproteobacteria	o__SC-I-84	f__	g__	s__	205306		k__Bacteria;p__Proteobacteria;c__Betaproteobacteria;o__SC-I-84;f__;g__;s__
OTU4341	0.00338346	0.00218777	0.00138774	0.00111642	0.000291971	0.000108855	4.76179e-05	0.00101809	0	5.38054e-05	0	0	0	0	0	0	k__Bacteria	p__Proteobacteria	c__Betaproteobacteria	o__SC-I-84	f__	g__	s__	205301		k__Bacteria;p__Proteobacteria;c__Betaproteobacteria;o__SC-I-84;f__;g__;s__
OTU4171	0.000277008	0.00021172	0.00134438	0.000868325	0.000269512	0.000163283	0.000880931	0.00127262	0	0	0	0	0	0	0	0	k__Bacteria	p__Proteobacteria	c__Betaproteobacteria	o__SC-I-84	f__	g__	s__	104916		k__Bacteria;p__Proteobacteria;c__Betaproteobacteria;o__SC-I-84;f__;g__;s__
OTU11434	1.97863e-05	4.70489e-05	4.3367e-05	9.30348e-05	0.000381808	0.000163283	0.000142854	2.31385e-05	0	2.69027e-05	4.36767e-05	6.25117e-05	0	0	0	3.66993e-05	k__Bacteria	p__Proteobacteria	c__Deltaproteobacteria	o__Bdellovibrionales	f__Bdellovibrionaceae	g__Bdellovibrio	s__	4308264		k__Bacteria;p__Proteobacteria;c__Deltaproteobacteria;o__Bdellovibrionales;f__Bdellovibrionaceae;g__Bdellovibrio;s__
OTU47106	7.91452e-05	7.05733e-05	6.50505e-05	0.000155058	8.98372e-05	0	4.76179e-05	0.000115693	0	0	0	0	0	0	0	0	k__Bacteria	p__Proteobacteria	c__Deltaproteobacteria	o__Desulfuromonadales	f__Geobacteraceae	g__Geobacter	s__	New.CleanUp.ReferenceOTU218585		k__Bacteria;p__Proteobacteria;c__Deltaproteobacteria;o__Desulfuromonadales;f__Geobacteraceae;g__Geobacter;s__
OTU11276	0.00114761	0.00199958	0.000542088	0.00130249	0.00195396	0.00204104	0.000357134	0.00198991	0	0	0	0	0	0	0	0	k__Bacteria	p__Proteobacteria	c__Deltaproteobacteria	o__Desulfuromonadales	f__Geobacteraceae	g__Geobacter	s__	4459295		k__Bacteria;p__Proteobacteria;c__Deltaproteobacteria;o__Desulfuromonadales;f__Geobacteraceae;g__Geobacter;s__
OTU7918	1.97863e-05	0.000117622	4.3367e-05	9.30348e-05	0.000179674	2.72138e-05	7.14269e-05	0.000115693	0	0	0	0	0	0	0	0	k__Bacteria	p__Proteobacteria	c__Deltaproteobacteria	o__Desulfuromonadales	f__Geobacteraceae	g__Geobacter	s__	4457067		k__Bacteria;p__Proteobacteria;c__Deltaproteobacteria;o__Desulfuromonadales;f__Geobacteraceae;g__Geobacter;s__
OTU4912	0	0.00042344	8.6734e-05	0	0	0.000190497	0.000142854	0.00016197	0	0	2.18384e-05	0	0	0	0	0	k__Bacteria	p__Proteobacteria	c__Deltaproteobacteria	o__Desulfuromonadales	f__Geobacteraceae	g__Geobacter	s__	4441572		k__Bacteria;p__Proteobacteria;c__Deltaproteobacteria;o__Desulfuromonadales;f__Geobacteraceae;g__Geobacter;s__
OTU105	5.93589e-05	4.70489e-05	4.3367e-05	3.10116e-05	8.98372e-05	8.16415e-05	7.14269e-05	2.31385e-05	0	0	0	0	0	0	0	0	k__Bacteria	p__Proteobacteria	c__Deltaproteobacteria	o__Desulfuromonadales	f__Geobacteraceae	g__Geobacter	s__	4438549		k__Bacteria;p__Proteobacteria;c__Deltaproteobacteria;o__Desulfuromonadales;f__Geobacteraceae;g__Geobacter;s__
OTU11126	0.000118718	0.000305818	2.16835e-05	3.10116e-05	0.000179674	0.000136069	0	0	0	0	0	0	0	0	0	0	k__Bacteria	p__Proteobacteria	c__Deltaproteobacteria	o__Desulfuromonadales	f__Geobacteraceae	g__Geobacter	s__	4424904		k__Bacteria;p__Proteobacteria;c__Deltaproteobacteria;o__Desulfuromonadales;f__Geobacteraceae;g__Geobacter;s__
OTU9668	5.93589e-05	0.000188195	2.16835e-05	9.30348e-05	8.98372e-05	2.72138e-05	0.000285707	0.000185108	0	0	0	0	0	0	0	0	k__Bacteria	p__Proteobacteria	c__Deltaproteobacteria	o__Desulfuromonadales	f__Geobacteraceae	g__Geobacter	s__	4401279		k__Bacteria;p__Proteobacteria;c__Deltaproteobacteria;o__Desulfuromonadales;f__Geobacteraceae;g__Geobacter;s__
OTU3142	3.95726e-05	0.000164671	0.000108418	0	8.98372e-05	0.000734774	4.76179e-05	2.31385e-05	0	0	6.55151e-05	0	0	0	0	0	k__Bacteria	p__Proteobacteria	c__Deltaproteobacteria	o__Desulfuromonadales	f__Geobacteraceae	g__Geobacter	s__	4389637		k__Bacteria;p__Proteobacteria;c__Deltaproteobacteria;o__Desulfuromonadales;f__Geobacteraceae;g__Geobacter;s__
OTU899	1.97863e-05	0.000188195	0.000108418	3.10116e-05	2.24593e-05	0.000843629	0.000380943	6.94155e-05	0	0	2.18384e-05	0	0	0	0	0	k__Bacteria	p__Proteobacteria	c__Deltaproteobacteria	o__Desulfuromonadales	f__Geobacteraceae	g__Geobacter	s__	4346395		k__Bacteria;p__Proteobacteria;c__Deltaproteobacteria;o__Desulfuromonadales;f__Geobacteraceae;g__Geobacter;s__
OTU1079	1.97863e-05	0.000141147	0	6.20232e-05	8.98372e-05	0.000380994	9.52358e-05	0	0	0	2.18384e-05	0	0	0	0	0	k__Bacteria	p__Proteobacteria	c__Deltaproteobacteria	o__Desulfuromonadales	f__Geobacteraceae	g__Geobacter	s__	4317168		k__Bacteria;p__Proteobacteria;c__Deltaproteobacteria;o__Desulfuromonadales;f__Geobacteraceae;g__Geobacter;s__
OTU9787	1.97863e-05	2.35244e-05	6.50505e-05	3.10116e-05	0.000134756	2.72138e-05	4.76179e-05	4.6277e-05	0	0	0	0	0	0	0	0	k__Bacteria	p__Proteobacteria	c__Deltaproteobacteria	o__Desulfuromonadales	f__Geobacteraceae	g__Geobacter	s__	4308119		k__Bacteria;p__Proteobacteria;c__Deltaproteobacteria;o__Desulfuromonadales;f__Geobacteraceae;g__Geobacter;s__
OTU3960	0.000138504	0.000164671	0.000130101	0.000217081	0.000134756	5.44277e-05	2.3809e-05	0.000208247	0	0	0	0	0	0	0	0	k__Bacteria	p__Proteobacteria	c__Deltaproteobacteria	o__Desulfuromonadales	f__Geobacteraceae	g__Geobacter	s__	4294451		k__Bacteria;p__Proteobacteria;c__Deltaproteobacteria;o__Desulfuromonadales;f__Geobacteraceae;g__Geobacter;s__
OTU2216	5.93589e-05	0.000164671	2.16835e-05	3.10116e-05	4.49186e-05	2.72138e-05	0	2.31385e-05	0	0	0	0	0	0	0	0	k__Bacteria	p__Proteobacteria	c__Deltaproteobacteria	o__Desulfuromonadales	f__Geobacteraceae	g__Geobacter	s__	1725261		k__Bacteria;p__Proteobacteria;c__Deltaproteobacteria;o__Desulfuromonadales;f__Geobacteraceae;g__Geobacter;s__
OTU10673	0.000672734	4.70489e-05	0.000498721	0.00096136	0.00137002	0.000163283	0.000380943	0.00217502	0	0	0	0	0	0	0	0	k__Bacteria	p__Proteobacteria	c__Deltaproteobacteria	o__Desulfuromonadales	f__Geobacteraceae	g__Geobacter	s__	1081014		k__Bacteria;p__Proteobacteria;c__Deltaproteobacteria;o__Desulfuromonadales;f__Geobacteraceae;g__Geobacter;s__
OTU7090	7.91452e-05	0.000258769	6.50505e-05	0.000341128	0.000134756	5.44277e-05	4.76179e-05	0.000254524	0	0	0	0	0	0	0	0	k__Bacteria	p__Proteobacteria	c__Deltaproteobacteria	o__Desulfuromonadales	f__Geobacteraceae	g__Geobacter	s__	1049851		k__Bacteria;p__Proteobacteria;c__Deltaproteobacteria;o__Desulfuromonadales;f__Geobacteraceae;g__Geobacter;s__
OTU8717	3.95726e-05	9.40977e-05	4.3367e-05	6.20232e-05	0.000247052	5.44277e-05	0.000119045	6.94155e-05	0	0	0	0	0	0	0	0	k__Bacteria	p__Proteobacteria	c__Deltaproteobacteria	o__Desulfuromonadales	f__Geobacteraceae	g__Geobacter	s__	1038525		k__Bacteria;p__Proteobacteria;c__Deltaproteobacteria;o__Desulfuromonadales;f__Geobacteraceae;g__Geobacter;s__
OTU844	0.000138504	0.000446964	0.000130101	6.20232e-05	2.24593e-05	0	0	0	0	0	0	0	0	0	0	0	k__Bacteria	p__Proteobacteria	c__Deltaproteobacteria	o__Desulfuromonadales	f__Geobacteraceae	g__Geobacter	s__	956988		k__Bacteria;p__Proteobacteria;c__Deltaproteobacteria;o__Desulfuromonadales;f__Geobacteraceae;g__Geobacter;s__
OTU6377	0.000494658	0.00185843	6.50505e-05	9.30348e-05	0.000157215	5.44277e-05	2.3809e-05	0.00016197	0	0	0	0	0	0	0	0	k__Bacteria	p__Proteobacteria	c__Deltaproteobacteria	o__Desulfuromonadales	f__Geobacteraceae	g__Geobacter	s__	527719		k__Bacteria;p__Proteobacteria;c__Deltaproteobacteria;o__Desulfuromonadales;f__Geobacteraceae;g__Geobacter;s__
OTU9340	5.93589e-05	0.000117622	4.3367e-05	0	0	2.72138e-05	0	4.6277e-05	0	0	0	0	0	0	0	0	k__Bacteria	p__Proteobacteria	c__Deltaproteobacteria	o__Desulfuromonadales	f__Geobacteraceae	g__Geobacter	s__	255281		k__Bacteria;p__Proteobacteria;c__Deltaproteobacteria;o__Desulfuromonadales;f__Geobacteraceae;g__Geobacter;s__
OTU10209	7.91452e-05	0.000305818	8.6734e-05	6.20232e-05	0.00031443	8.16415e-05	2.3809e-05	0.000115693	0	0	0	0	0	0	0	0	k__Bacteria	p__Proteobacteria	c__Deltaproteobacteria	o__Desulfuromonadales	f__Geobacteraceae	g__Geobacter	s__	226377		k__Bacteria;p__Proteobacteria;c__Deltaproteobacteria;o__Desulfuromonadales;f__Geobacteraceae;g__Geobacter;s__
OTU2231	0.00015829	4.70489e-05	2.16835e-05	0	0	0	4.76179e-05	0.000115693	0	0	0	0	0	0	0	0	k__Bacteria	p__Proteobacteria	c__Deltaproteobacteria	o__Desulfuromonadales	f__Geobacteraceae	g__Geobacter	s__	115374		k__Bacteria;p__Proteobacteria;c__Deltaproteobacteria;o__Desulfuromonadales;f__Geobacteraceae;g__Geobacter;s__
OTU11048	0.000257222	0.000564586	6.50505e-05	0.000558209	0.000471645	0.000163283	9.52358e-05	0.000763571	0	0	0	0	0	0	0	0	k__Bacteria	p__Proteobacteria	c__Deltaproteobacteria	o__Desulfuromonadales	f__Geobacteraceae	g__Geobacter	s__	112765		k__Bacteria;p__Proteobacteria;c__Deltaproteobacteria;o__Desulfuromonadales;f__Geobacteraceae;g__Geobacter;s__
OTU12160	1.97863e-05	4.70489e-05	6.50505e-05	3.10116e-05	8.98372e-05	0	0.000119045	4.6277e-05	0	0	0	0	0	0	2.4785e-05	0	k__Bacteria	p__Proteobacteria	c__Deltaproteobacteria	o__Myxococcales	f__	g__	s__	New.ReferenceOTU975		k__Bacteria;p__Proteobacteria;c__Deltaproteobacteria;o__Myxococcales;f__;g__;s__
OTU11958	9.89315e-05	2.35244e-05	8.6734e-05	0.000372139	2.24593e-05	0.000217711	0.000119045	0.000208247	0	0	0	0	0	0	0	0	k__Bacteria	p__Proteobacteria	c__Deltaproteobacteria	o__Myxococcales	f__	g__	s__	New.ReferenceOTU699		k__Bacteria;p__Proteobacteria;c__Deltaproteobacteria;o__Myxococcales;f__;g__;s__
OTU12323	1.97863e-05	4.70489e-05	6.50505e-05	0.000124046	0.000247052	0.00035378	0.000380943	0.000115693	0	0	6.55151e-05	0	4.8329e-05	0	2.4785e-05	1.83496e-05	k__Bacteria	p__Proteobacteria	c__Deltaproteobacteria	o__Myxococcales	f__	g__	s__	New.ReferenceOTU482		k__Bacteria;p__Proteobacteria;c__Deltaproteobacteria;o__Myxococcales;f__;g__;s__
OTU11851	0.000118718	7.05733e-05	8.6734e-05	6.20232e-05	4.49186e-05	0	4.76179e-05	0.000138831	0	0	0	0	0	0	0	0	k__Bacteria	p__Proteobacteria	c__Deltaproteobacteria	o__Myxococcales	f__	g__	s__	New.ReferenceOTU142		k__Bacteria;p__Proteobacteria;c__Deltaproteobacteria;o__Myxococcales;f__;g__;s__
OTU12070	5.93589e-05	0.00021172	0.000260202	3.10116e-05	2.24593e-05	0	9.52358e-05	0.000185108	0	0	0	0	0	0	0	0	k__Bacteria	p__Proteobacteria	c__Deltaproteobacteria	o__Myxococcales	f__	g__	s__	New.ReferenceOTU1043		k__Bacteria;p__Proteobacteria;c__Deltaproteobacteria;o__Myxococcales;f__;g__;s__
OTU61851	7.91452e-05	0.000117622	4.3367e-05	0.000155058	4.49186e-05	0	2.3809e-05	4.6277e-05	0	0	0	0	0	0	0	0	k__Bacteria	p__Proteobacteria	c__Deltaproteobacteria	o__Myxococcales	f__	g__	s__	New.CleanUp.ReferenceOTU310606		k__Bacteria;p__Proteobacteria;c__Deltaproteobacteria;o__Myxococcales;f__;g__;s__
OTU57186	0.000138504	7.05733e-05	8.6734e-05	6.20232e-05	0	0	0	6.94155e-05	0	0	0	0	0	0	0	0	k__Bacteria	p__Proteobacteria	c__Deltaproteobacteria	o__Myxococcales	f__	g__	s__	New.CleanUp.ReferenceOTU281265		k__Bacteria;p__Proteobacteria;c__Deltaproteobacteria;o__Myxococcales;f__;g__;s__
OTU57183	3.95726e-05	7.05733e-05	0.000130101	9.30348e-05	0	0	2.3809e-05	6.94155e-05	0	0	0	0	0	0	0	0	k__Bacteria	p__Proteobacteria	c__Deltaproteobacteria	o__Myxococcales	f__	g__	s__	New.CleanUp.ReferenceOTU281244		k__Bacteria;p__Proteobacteria;c__Deltaproteobacteria;o__Myxococcales;f__;g__;s__
OTU56406	9.89315e-05	7.05733e-05	4.3367e-05	0.000217081	4.49186e-05	0	2.3809e-05	0.00016197	0	0	0	0	0	0	0	0	k__Bacteria	p__Proteobacteria	c__Deltaproteobacteria	o__Myxococcales	f__	g__	s__	New.CleanUp.ReferenceOTU276635		k__Bacteria;p__Proteobacteria;c__Deltaproteobacteria;o__Myxococcales;f__;g__;s__
OTU47660	0	7.05733e-05	2.16835e-05	0.000155058	6.73779e-05	0	0.000142854	0.000115693	0	2.69027e-05	0	0	0	0	0	0	k__Bacteria	p__Proteobacteria	c__Deltaproteobacteria	o__Myxococcales	f__	g__	s__	New.CleanUp.ReferenceOTU221915		k__Bacteria;p__Proteobacteria;c__Deltaproteobacteria;o__Myxococcales;f__;g__;s__
OTU46549	5.93589e-05	9.40977e-05	2.16835e-05	0.000217081	4.49186e-05	0	9.52358e-05	0.000115693	0	0	0	0	0	0	0	0	k__Bacteria	p__Proteobacteria	c__Deltaproteobacteria	o__Myxococcales	f__	g__	s__	New.CleanUp.ReferenceOTU215223		k__Bacteria;p__Proteobacteria;c__Deltaproteobacteria;o__Myxococcales;f__;g__;s__
OTU6177	0.000217649	0.000141147	2.16835e-05	0.000124046	0.000157215	0	0	0	0	0	2.18384e-05	0	0	5.1709e-05	0	0	k__Bacteria	p__Proteobacteria	c__Deltaproteobacteria	o__Myxococcales	f__	g__	s__	4437938		k__Bacteria;p__Proteobacteria;c__Deltaproteobacteria;o__Myxococcales;f__;g__;s__
OTU10260	0.000178077	0.000282293	6.50505e-05	0.000372139	0.000988209	2.72138e-05	0.000357134	0.000347078	0	2.69027e-05	0	8.3349e-05	0	5.1709e-05	4.957e-05	5.50489e-05	k__Bacteria	p__Proteobacteria	c__Deltaproteobacteria	o__Myxococcales	f__	g__	s__	4385959		k__Bacteria;p__Proteobacteria;c__Deltaproteobacteria;o__Myxococcales;f__;g__;s__
OTU1113	0.00015829	0.00021172	0.000108418	0.000217081	6.73779e-05	2.72138e-05	2.3809e-05	9.2554e-05	0	0	0	0	0	0	0	0	k__Bacteria	p__Proteobacteria	c__Deltaproteobacteria	o__Myxococcales	f__	g__	s__	4345857		k__Bacteria;p__Proteobacteria;c__Deltaproteobacteria;o__Myxococcales;f__;g__;s__
OTU4517	0.000257222	9.40977e-05	0.000260202	0.00018607	0.000179674	0.000163283	0.000261899	0.000185108	5.27315e-05	8.07081e-05	0	0	0	0	2.4785e-05	1.83496e-05	k__Bacteria	p__Proteobacteria	c__Deltaproteobacteria	o__Myxococcales	f__	g__	s__	4339018		k__Bacteria;p__Proteobacteria;c__Deltaproteobacteria;o__Myxococcales;f__;g__;s__
OTU4775	3.95726e-05	0	6.50505e-05	6.20232e-05	0	0	4.76179e-05	0.000208247	0	0	0	0	0	0	0	0	k__Bacteria	p__Proteobacteria	c__Deltaproteobacteria	o__Myxococcales	f__	g__	s__	4329610		k__Bacteria;p__Proteobacteria;c__Deltaproteobacteria;o__Myxococcales;f__;g__;s__
OTU8461	0.00235457	0.00371686	8.6734e-05	0.00471376	0.00172937	0.000136069	4.76179e-05	0.000138831	0	0	0	0	0	0	0	0	k__Bacteria	p__Proteobacteria	c__Deltaproteobacteria	o__Myxococcales	f__	g__	s__	4302753		k__Bacteria;p__Proteobacteria;c__Deltaproteobacteria;o__Myxococcales;f__;g__;s__
OTU6978	0.000296795	0.000188195	6.50505e-05	0.000124046	6.73779e-05	0	0	2.31385e-05	0	0	0	0	0	0	0	0	k__Bacteria	p__Proteobacteria	c__Deltaproteobacteria	o__Myxococcales	f__	g__	s__	2591424		k__Bacteria;p__Proteobacteria;c__Deltaproteobacteria;o__Myxococcales;f__;g__;s__
OTU5227	9.89315e-05	0.00021172	0.000151785	0	8.98372e-05	0	9.52358e-05	0.000971817	0.000131829	0	0	2.08372e-05	4.8329e-05	5.1709e-05	4.957e-05	1.83496e-05	k__Bacteria	p__Proteobacteria	c__Deltaproteobacteria	o__Myxococcales	f__	g__	s__	2362284		k__Bacteria;p__Proteobacteria;c__Deltaproteobacteria;o__Myxococcales;f__;g__;s__
OTU9198	0	7.05733e-05	2.16835e-05	3.10116e-05	4.49186e-05	0.000136069	4.76179e-05	0.000300801	0	0	2.18384e-05	0	0	0	0	0	k__Bacteria	p__Proteobacteria	c__Deltaproteobacteria	o__Myxococcales	f__	g__	s__	1144575		k__Bacteria;p__Proteobacteria;c__Deltaproteobacteria;o__Myxococcales;f__;g__;s__
OTU4884	7.91452e-05	0.000329342	0.000715556	0.000496186	0.000404267	5.44277e-05	0.000404752	0.000948679	0	2.69027e-05	0	0	0	0	0	0	k__Bacteria	p__Proteobacteria	c__Deltaproteobacteria	o__Myxococcales	f__	g__	s__	1140514		k__Bacteria;p__Proteobacteria;c__Deltaproteobacteria;o__Myxococcales;f__;g__;s__
OTU2028	0	0.00021172	0.000303569	0.00018607	0.000179674	0.000680346	2.3809e-05	0.000416493	0	2.69027e-05	0.00026206	0.000104186	0	0	2.4785e-05	7.33985e-05	k__Bacteria	p__Proteobacteria	c__Deltaproteobacteria	o__Myxococcales	f__	g__	s__	1132826		k__Bacteria;p__Proteobacteria;c__Deltaproteobacteria;o__Myxococcales;f__;g__;s__
OTU10955	7.91452e-05	9.40977e-05	2.16835e-05	9.30348e-05	8.98372e-05	0.000462635	0.000142854	0.000300801	0	0	6.55151e-05	0	0	0.000155127	2.4785e-05	3.66993e-05	k__Bacteria	p__Proteobacteria	c__Deltaproteobacteria	o__Myxococcales	f__	g__	s__	1107608		k__Bacteria;p__Proteobacteria;c__Deltaproteobacteria;o__Myxococcales;f__;g__;s__
OTU10012	3.95726e-05	0	8.6734e-05	3.10116e-05	4.49186e-05	0.000163283	9.52358e-05	9.2554e-05	0	0	0	0	0	0	0	0	k__Bacteria	p__Proteobacteria	c__Deltaproteobacteria	o__Myxococcales	f__	g__	s__	1016118		k__Bacteria;p__Proteobacteria;c__Deltaproteobacteria;o__Myxococcales;f__;g__;s__
OTU8302	0.00015829	9.40977e-05	0.000195152	0.000279104	4.49186e-05	2.72138e-05	0.000142854	0.000115693	0	0	0	2.08372e-05	0	0	0	1.83496e-05	k__Bacteria	p__Proteobacteria	c__Deltaproteobacteria	o__Myxococcales	f__	g__	s__	824783		k__Bacteria;p__Proteobacteria;c__Deltaproteobacteria;o__Myxococcales;f__;g__;s__
OTU9613	0.000138504	0.000446964	0.000260202	0.000372139	6.73779e-05	0	7.14269e-05	0.000323939	0	0	0	0	0	0	0	0	k__Bacteria	p__Proteobacteria	c__Deltaproteobacteria	o__Myxococcales	f__	g__	s__	793319		k__Bacteria;p__Proteobacteria;c__Deltaproteobacteria;o__Myxococcales;f__;g__;s__
OTU954	0.000138504	0.000329342	6.50505e-05	0.000372139	0.00152723	0.000979698	0.00109521	0.000786709	5.27315e-05	2.69027e-05	0.000174707	2.08372e-05	9.6658e-05	0.000180981	0	3.66993e-05	k__Bacteria	p__Proteobacteria	c__Deltaproteobacteria	o__Myxococcales	f__	g__	s__	662983		k__Bacteria;p__Proteobacteria;c__Deltaproteobacteria;o__Myxococcales;f__;g__;s__
OTU9433	3.95726e-05	4.70489e-05	4.3367e-05	0	2.24593e-05	0.000136069	4.76179e-05	9.2554e-05	0	0	0	2.08372e-05	0	0	0	0	k__Bacteria	p__Proteobacteria	c__Deltaproteobacteria	o__Myxococcales	f__	g__	s__	641481		k__Bacteria;p__Proteobacteria;c__Deltaproteobacteria;o__Myxococcales;f__;g__;s__
OTU8724	0.000178077	0.000188195	0.000173468	0.000868325	0.000561482	5.44277e-05	4.76179e-05	0.000647878	0	0	0	0	0	0	0	0	k__Bacteria	p__Proteobacteria	c__Deltaproteobacteria	o__Myxococcales	f__	g__	s__	539496		k__Bacteria;p__Proteobacteria;c__Deltaproteobacteria;o__Myxococcales;f__;g__;s__
OTU5968	0	0	0.000130101	9.30348e-05	6.73779e-05	0.000136069	4.76179e-05	0.000277662	0	0	0	0	0	0	0	5.50489e-05	k__Bacteria	p__Proteobacteria	c__Deltaproteobacteria	o__Myxococcales	f__	g__	s__	331980		k__Bacteria;p__Proteobacteria;c__Deltaproteobacteria;o__Myxococcales;f__;g__;s__
OTU9732	0.000356154	0.00042344	0.000542088	0.000558209	0.00094329	0.00100691	0.000285707	0.000832986	2.63657e-05	2.69027e-05	0.00039309	8.3349e-05	0.000169152	0.00023269	7.4355e-05	0.000165147	k__Bacteria	p__Proteobacteria	c__Deltaproteobacteria	o__Myxococcales	f__	g__	s__	250050		k__Bacteria;p__Proteobacteria;c__Deltaproteobacteria;o__Myxococcales;f__;g__;s__
OTU2394	0	0.000141147	2.16835e-05	0.000248093	2.24593e-05	0	0.000214281	0.000347078	0	0	0	0	0	0	0	0	k__Bacteria	p__Proteobacteria	c__Deltaproteobacteria	o__Myxococcales	f__	g__	s__	249425		k__Bacteria;p__Proteobacteria;c__Deltaproteobacteria;o__Myxococcales;f__;g__;s__
OTU9050	7.91452e-05	4.70489e-05	6.50505e-05	0	4.49186e-05	0	7.14269e-05	2.31385e-05	0	0	0	0	0	0	0	0	k__Bacteria	p__Proteobacteria	c__Deltaproteobacteria	o__Myxococcales	f__	g__	s__	221410		k__Bacteria;p__Proteobacteria;c__Deltaproteobacteria;o__Myxococcales;f__;g__;s__
OTU11058	7.91452e-05	0.000188195	0.000195152	0.000341128	0.000808535	0.00114298	0.000595224	2.31385e-05	0	0.000215222	0.00013103	4.16745e-05	4.8329e-05	7.75635e-05	9.914e-05	0.000532139	k__Bacteria	p__Proteobacteria	c__Deltaproteobacteria	o__Myxococcales	f__Haliangiaceae	g__	s__	1135669		k__Bacteria;p__Proteobacteria;c__Deltaproteobacteria;o__Myxococcales;f__Haliangiaceae;g__;s__
OTU8686	1.97863e-05	0.000117622	6.50505e-05	6.20232e-05	0	5.44277e-05	2.3809e-05	9.2554e-05	0	0	0	0	0	0	0	0	k__Bacteria	p__Proteobacteria	c__Deltaproteobacteria	o__Myxococcales	f__Haliangiaceae	g__	s__	944435		k__Bacteria;p__Proteobacteria;c__Deltaproteobacteria;o__Myxococcales;f__Haliangiaceae;g__;s__
OTU1208	0.000237436	0.000446964	0.000346936	0.000992371	0.000561482	0.000190497	0.000214281	0.000370216	0	2.69027e-05	0	0	0	0	0	0	k__Bacteria	p__Proteobacteria	c__Deltaproteobacteria	o__Myxococcales	f__Haliangiaceae	g__	s__	720217		k__Bacteria;p__Proteobacteria;c__Deltaproteobacteria;o__Myxococcales;f__Haliangiaceae;g__;s__
OTU2733	7.91452e-05	0.000188195	0.000130101	6.20232e-05	6.73779e-05	2.72138e-05	0	2.31385e-05	0	0	0	0	0	0	0	0	k__Bacteria	p__Proteobacteria	c__Deltaproteobacteria	o__Myxococcales	f__Haliangiaceae	g__	s__	279206		k__Bacteria;p__Proteobacteria;c__Deltaproteobacteria;o__Myxococcales;f__Haliangiaceae;g__;s__
OTU6320	1.97863e-05	2.35244e-05	2.16835e-05	6.20232e-05	6.73779e-05	0.000108855	0.000214281	4.6277e-05	2.63657e-05	2.69027e-05	0	0	0	0	0	0	k__Bacteria	p__Proteobacteria	c__Deltaproteobacteria	o__Myxococcales	f__Haliangiaceae	g__	s__	239581		k__Bacteria;p__Proteobacteria;c__Deltaproteobacteria;o__Myxococcales;f__Haliangiaceae;g__;s__
OTU5556	0.00015829	0.000141147	0.000390303	9.30348e-05	0.00096575	0.000136069	0.000333325	2.31385e-05	2.63657e-05	5.38054e-05	0	2.08372e-05	0	2.58545e-05	2.4785e-05	5.50489e-05	k__Bacteria	p__Proteobacteria	c__Deltaproteobacteria	o__Myxococcales	f__Haliangiaceae	g__	s__	217328		k__Bacteria;p__Proteobacteria;c__Deltaproteobacteria;o__Myxococcales;f__Haliangiaceae;g__;s__
OTU1881	0.000118718	0.000305818	4.3367e-05	0.000155058	0.000157215	0.000326566	7.14269e-05	0.000439632	0	0	0	0	0	0	0	0	k__Bacteria	p__Proteobacteria	c__Deltaproteobacteria	o__Myxococcales	f__Myxococcaceae	g__Anaeromyxobacter	s__	353729		k__Bacteria;p__Proteobacteria;c__Deltaproteobacteria;o__Myxococcales;f__Myxococcaceae;g__Anaeromyxobacter;s__
OTU8670	0.000455085	0.000329342	0.000108418	9.30348e-05	0	0	2.3809e-05	0	0	0	0	0	0	0	0	0	k__Bacteria	p__Proteobacteria	c__Deltaproteobacteria	o__Myxococcales	f__Nannocystaceae	g__Plesiocystis	s__	3992505		k__Bacteria;p__Proteobacteria;c__Deltaproteobacteria;o__Myxococcales;f__Nannocystaceae;g__Plesiocystis;s__
OTU7267	0.000257222	9.40977e-05	0.000520404	0	0	0	2.3809e-05	6.94155e-05	0	0	0	0	0	0	0	0	k__Bacteria	p__Proteobacteria	c__Deltaproteobacteria	o__Myxococcales	f__OM27	g__	s__	2788509		k__Bacteria;p__Proteobacteria;c__Deltaproteobacteria;o__Myxococcales;f__OM27;g__;s__
OTU11582	0.000138504	0.000141147	0.000108418	9.30348e-05	0.000134756	2.72138e-05	0.000380943	9.2554e-05	2.63657e-05	0	0	0.000145861	4.8329e-05	0.000129272	0	1.83496e-05	k__Bacteria	p__Proteobacteria	c__Deltaproteobacteria	o__Myxococcales	f__Polyangiaceae	g__	s__	New.ReferenceOTU785		k__Bacteria;p__Proteobacteria;c__Deltaproteobacteria;o__Myxococcales;f__Polyangiaceae;g__;s__
OTU11463	0.000257222	7.05733e-05	0.000130101	9.30348e-05	2.24593e-05	0	2.3809e-05	6.94155e-05	0	5.38054e-05	0	0	2.41645e-05	0	0	0	k__Bacteria	p__Proteobacteria	c__Deltaproteobacteria	o__Myxococcales	f__Polyangiaceae	g__	s__	4469134		k__Bacteria;p__Proteobacteria;c__Deltaproteobacteria;o__Myxococcales;f__Polyangiaceae;g__;s__
OTU10658	1.97863e-05	0.000117622	0.000108418	9.30348e-05	2.24593e-05	8.16415e-05	9.52358e-05	0.000115693	0	0	0	0	0	5.1709e-05	0	0	k__Bacteria	p__Proteobacteria	c__Deltaproteobacteria	o__Myxococcales	f__Polyangiaceae	g__	s__	1017063		k__Bacteria;p__Proteobacteria;c__Deltaproteobacteria;o__Myxococcales;f__Polyangiaceae;g__;s__
OTU392	0.000237436	9.40977e-05	0.000130101	0.00018607	2.24593e-05	2.72138e-05	2.3809e-05	2.31385e-05	0	0	0	0	0	0	0	0	k__Bacteria	p__Proteobacteria	c__Deltaproteobacteria	o__Myxococcales	f__Polyangiaceae	g__	s__	830539		k__Bacteria;p__Proteobacteria;c__Deltaproteobacteria;o__Myxococcales;f__Polyangiaceae;g__;s__
OTU6437	0.000356154	0.00042344	0.000542088	0.000279104	0.000134756	8.16415e-05	0.000285707	2.31385e-05	0	2.69027e-05	0	0	4.8329e-05	2.58545e-05	0	3.66993e-05	k__Bacteria	p__Proteobacteria	c__Deltaproteobacteria	o__Myxococcales	f__Polyangiaceae	g__	s__	808919		k__Bacteria;p__Proteobacteria;c__Deltaproteobacteria;o__Myxococcales;f__Polyangiaceae;g__;s__
OTU11720	0.000494658	0.000164671	0.000108418	0.000217081	2.24593e-05	0	0	2.31385e-05	0	0	0	0	0	0	0	0	k__Bacteria	p__Proteobacteria	c__Deltaproteobacteria	o__NB1-j	f__	g__	s__	New.ReferenceOTU453		k__Bacteria;p__Proteobacteria;c__Deltaproteobacteria;o__NB1-j;f__;g__;s__
OTU12409	3.95726e-05	0.000541062	0.000130101	0.000217081	2.24593e-05	0	0	0	0	0	0	0	0	0	0	0	k__Bacteria	p__Proteobacteria	c__Deltaproteobacteria	o__Syntrophobacterales	f__Syntrophobacteraceae	g__	s__	New.ReferenceOTU863		k__Bacteria;p__Proteobacteria;c__Deltaproteobacteria;o__Syntrophobacterales;f__Syntrophobacteraceae;g__;s__
OTU11957	0.00015829	0.000164671	0.000281886	0.000155058	2.24593e-05	0	2.3809e-05	0.000115693	0	0	0	0	0	0	0	0	k__Bacteria	p__Proteobacteria	c__Deltaproteobacteria	o__Syntrophobacterales	f__Syntrophobacteraceae	g__	s__	New.ReferenceOTU348		k__Bacteria;p__Proteobacteria;c__Deltaproteobacteria;o__Syntrophobacterales;f__Syntrophobacteraceae;g__;s__
OTU24615	0.000732093	0.000799831	0.000173468	0.000372139	4.49186e-05	0	7.14269e-05	6.94155e-05	0	0	0	0	0	0	0	0	k__Bacteria	p__Proteobacteria	c__Deltaproteobacteria	o__Syntrophobacterales	f__Syntrophobacteraceae	g__	s__	New.CleanUp.ReferenceOTU75310		k__Bacteria;p__Proteobacteria;c__Deltaproteobacteria;o__Syntrophobacterales;f__Syntrophobacteraceae;g__;s__
OTU12964	0.000356154	0.000329342	0.000173468	0.000155058	0	0	0	0	0	0	0	0	0	0	0	0	k__Bacteria	p__Proteobacteria	c__Deltaproteobacteria	o__Syntrophobacterales	f__Syntrophobacteraceae	g__	s__	New.CleanUp.ReferenceOTU3357		k__Bacteria;p__Proteobacteria;c__Deltaproteobacteria;o__Syntrophobacterales;f__Syntrophobacteraceae;g__;s__
OTU50258	0.000118718	0.000141147	8.6734e-05	0.000155058	0	0	0	2.31385e-05	0	0	0	0	0	0	0	0	k__Bacteria	p__Proteobacteria	c__Deltaproteobacteria	o__Syntrophobacterales	f__Syntrophobacteraceae	g__	s__	New.CleanUp.ReferenceOTU238118		k__Bacteria;p__Proteobacteria;c__Deltaproteobacteria;o__Syntrophobacterales;f__Syntrophobacteraceae;g__;s__
OTU50074	0.000178077	0.000141147	0.000173468	6.20232e-05	0	0	0	4.6277e-05	0	0	0	0	0	0	0	0	k__Bacteria	p__Proteobacteria	c__Deltaproteobacteria	o__Syntrophobacterales	f__Syntrophobacteraceae	g__	s__	New.CleanUp.ReferenceOTU236908		k__Bacteria;p__Proteobacteria;c__Deltaproteobacteria;o__Syntrophobacterales;f__Syntrophobacteraceae;g__;s__
OTU32664	0.000118718	7.05733e-05	0.000108418	9.30348e-05	0	0	0	2.31385e-05	0	0	0	0	0	0	0	0	k__Bacteria	p__Proteobacteria	c__Deltaproteobacteria	o__Syntrophobacterales	f__Syntrophobacteraceae	g__	s__	New.CleanUp.ReferenceOTU127783		k__Bacteria;p__Proteobacteria;c__Deltaproteobacteria;o__Syntrophobacterales;f__Syntrophobacteraceae;g__;s__
OTU3834	3.95726e-05	7.05733e-05	4.3367e-05	0.000806302	8.98372e-05	0	0.000214281	0.000555324	0	0	0	0	0	0	0	0	k__Bacteria	p__Proteobacteria	c__Deltaproteobacteria	o__Syntrophobacterales	f__Syntrophobacteraceae	g__	s__	4416974		k__Bacteria;p__Proteobacteria;c__Deltaproteobacteria;o__Syntrophobacterales;f__Syntrophobacteraceae;g__;s__
OTU4628	0.0014444	0.00129384	0.000607138	0.000341128	2.24593e-05	0	4.76179e-05	0.000185108	0	0	0	0	0	0	0	0	k__Bacteria	p__Proteobacteria	c__Deltaproteobacteria	o__Syntrophobacterales	f__Syntrophobacteraceae	g__	s__	4390506		k__Bacteria;p__Proteobacteria;c__Deltaproteobacteria;o__Syntrophobacterales;f__Syntrophobacteraceae;g__;s__
OTU10150	0.00358132	0.0050107	0.00327421	0.00421758	0.000269512	2.72138e-05	0.000547606	0.000370216	0	0	0	0	0	0	0	0	k__Bacteria	p__Proteobacteria	c__Deltaproteobacteria	o__Syntrophobacterales	f__Syntrophobacteraceae	g__	s__	4308759		k__Bacteria;p__Proteobacteria;c__Deltaproteobacteria;o__Syntrophobacterales;f__Syntrophobacteraceae;g__;s__
OTU11072	0.000316581	0.000329342	0.000108418	0	0.000381808	2.72138e-05	0	2.31385e-05	0	0	0	0	0	0	0	0	k__Bacteria	p__Proteobacteria	c__Deltaproteobacteria	o__Syntrophobacterales	f__Syntrophobacteraceae	g__	s__	4011113		k__Bacteria;p__Proteobacteria;c__Deltaproteobacteria;o__Syntrophobacterales;f__Syntrophobacteraceae;g__;s__
OTU14	9.89315e-05	4.70489e-05	0.000151785	6.20232e-05	0.000202134	0	2.3809e-05	2.31385e-05	0	0	0	0	0	0	0	0	k__Bacteria	p__Proteobacteria	c__Deltaproteobacteria	o__Syntrophobacterales	f__Syntrophobacteraceae	g__	s__	1127173		k__Bacteria;p__Proteobacteria;c__Deltaproteobacteria;o__Syntrophobacterales;f__Syntrophobacteraceae;g__;s__
OTU8586	0.000217649	0.000517537	0.000303569	0.000279104	6.73779e-05	0	9.52358e-05	0.000208247	0	0	0	0	0	0	0	0	k__Bacteria	p__Proteobacteria	c__Deltaproteobacteria	o__Syntrophobacterales	f__Syntrophobacteraceae	g__	s__	622364		k__Bacteria;p__Proteobacteria;c__Deltaproteobacteria;o__Syntrophobacterales;f__Syntrophobacteraceae;g__;s__
OTU5552	0.000929956	0.00167023	4.3367e-05	0.00148856	0.000291971	0.000108855	0.000261899	2.31385e-05	0	0	0	0	0	0	0	0	k__Bacteria	p__Proteobacteria	c__Deltaproteobacteria	o__Syntrophobacterales	f__Syntrophobacteraceae	g__	s__	550245		k__Bacteria;p__Proteobacteria;c__Deltaproteobacteria;o__Syntrophobacterales;f__Syntrophobacteraceae;g__;s__
OTU9512	0.00459042	0.000729257	0.000823973	0.00114743	0.000202134	2.72138e-05	2.3809e-05	0.000578463	0	0	0	0	0	0	0	0	k__Bacteria	p__Proteobacteria	c__Deltaproteobacteria	o__Syntrophobacterales	f__Syntrophobacteraceae	g__	s__	539907		k__Bacteria;p__Proteobacteria;c__Deltaproteobacteria;o__Syntrophobacterales;f__Syntrophobacteraceae;g__;s__
OTU6794	0.000178077	9.40977e-05	0.000238519	0.000372139	4.49186e-05	0	4.76179e-05	2.31385e-05	0	0	0	0	0	0	0	0	k__Bacteria	p__Proteobacteria	c__Deltaproteobacteria	o__Syntrophobacterales	f__Syntrophobacteraceae	g__	s__	346925		k__Bacteria;p__Proteobacteria;c__Deltaproteobacteria;o__Syntrophobacterales;f__Syntrophobacteraceae;g__;s__
OTU7593	0.0013059	9.40977e-05	8.6734e-05	0.000837313	4.49186e-05	5.44277e-05	7.14269e-05	0.000300801	0	0	0	0	0	0	0	0	k__Bacteria	p__Proteobacteria	c__Gammaproteobacteria	o__HTCC2188	f__HTCC2089	g__	s__	962736		k__Bacteria;p__Proteobacteria;c__Gammaproteobacteria;o__HTCC2188;f__HTCC2089;g__;s__
OTU10980	0.000633162	7.05733e-05	8.6734e-05	0.000992371	0.000179674	0	2.3809e-05	2.31385e-05	0	0	0	0	0	0	0	0	k__Bacteria	p__Proteobacteria	c__Gammaproteobacteria	o__HTCC2188	f__HTCC2089	g__	s__	819885		k__Bacteria;p__Proteobacteria;c__Gammaproteobacteria;o__HTCC2188;f__HTCC2089;g__;s__
OTU2242	0.000138504	0.000141147	0.000108418	9.30348e-05	0	0	4.76179e-05	6.94155e-05	0	0	0	0	0	0	0	0	k__Bacteria	p__Proteobacteria	c__Gammaproteobacteria	o__Legionellales	f__Coxiellaceae	g__Aquicella	s__	1099157		k__Bacteria;p__Proteobacteria;c__Gammaproteobacteria;o__Legionellales;f__Coxiellaceae;g__Aquicella;s__
OTU2379	1.97863e-05	7.05733e-05	0.000238519	6.20232e-05	0	0	2.3809e-05	0	0	0	0	0	0	0	0	0	k__Bacteria	p__Proteobacteria	c__Gammaproteobacteria	o__Thiotrichales	f__Piscirickettsiaceae	g__	s__	4409397		k__Bacteria;p__Proteobacteria;c__Gammaproteobacteria;o__Thiotrichales;f__Piscirickettsiaceae;g__;s__
OTU273	0.00142461	0.00119975	0.00136606	0.00111642	0.000426727	2.72138e-05	0.000309516	0.000647878	2.63657e-05	0	0	0	0	0	0	0	k__Bacteria	p__Proteobacteria	c__Gammaproteobacteria	o__Thiotrichales	f__Piscirickettsiaceae	g__	s__	539866		k__Bacteria;p__Proteobacteria;c__Gammaproteobacteria;o__Thiotrichales;f__Piscirickettsiaceae;g__;s__
OTU28398	0.000336367	0.000164671	0.000346936	0.000124046	0	0	0.000142854	0.000185108	0	2.69027e-05	0	0	0	0	0	0	k__Bacteria	p__Proteobacteria	c__Gammaproteobacteria	o__Xanthomonadales	f__Sinobacteraceae	g__	s__	New.CleanUp.ReferenceOTU99929		k__Bacteria;p__Proteobacteria;c__Gammaproteobacteria;o__Xanthomonadales;f__Sinobacteraceae;g__;s__
OTU281	0.000237436	2.35244e-05	0.000325253	9.30348e-05	0.000157215	2.72138e-05	4.76179e-05	0	0	8.07081e-05	2.18384e-05	0	0	0	0	0	k__Bacteria	p__Proteobacteria	c__Gammaproteobacteria	o__Xanthomonadales	f__Sinobacteraceae	g__	s__	4437903		k__Bacteria;p__Proteobacteria;c__Gammaproteobacteria;o__Xanthomonadales;f__Sinobacteraceae;g__;s__
OTU3641	0.000415512	0.000117622	0.000108418	3.10116e-05	0	0	0	4.6277e-05	0	0	0	0	0	0	0	0	k__Bacteria	p__Proteobacteria	c__Gammaproteobacteria	o__Xanthomonadales	f__Sinobacteraceae	g__	s__	4421846		k__Bacteria;p__Proteobacteria;c__Gammaproteobacteria;o__Xanthomonadales;f__Sinobacteraceae;g__;s__
OTU9628	9.89315e-05	0.000352866	0.0014528	0.000403151	8.98372e-05	2.72138e-05	0.000404752	0.000786709	0	0	0	2.08372e-05	0	5.1709e-05	2.4785e-05	5.50489e-05	k__Bacteria	p__Proteobacteria	c__Gammaproteobacteria	o__Xanthomonadales	f__Sinobacteraceae	g__	s__	4373617		k__Bacteria;p__Proteobacteria;c__Gammaproteobacteria;o__Xanthomonadales;f__Sinobacteraceae;g__;s__
OTU7643	0.000217649	9.40977e-05	0.000281886	0.000155058	8.98372e-05	5.44277e-05	7.14269e-05	0	0	2.69027e-05	2.18384e-05	0	0	0	2.4785e-05	0	k__Bacteria	p__Proteobacteria	c__Gammaproteobacteria	o__Xanthomonadales	f__Sinobacteraceae	g__	s__	4320381		k__Bacteria;p__Proteobacteria;c__Gammaproteobacteria;o__Xanthomonadales;f__Sinobacteraceae;g__;s__
OTU3895	3.95726e-05	4.70489e-05	0.000542088	0.000248093	4.49186e-05	8.16415e-05	0.00069046	0.000323939	2.63657e-05	5.38054e-05	2.18384e-05	4.16745e-05	2.41645e-05	2.58545e-05	7.4355e-05	7.33985e-05	k__Bacteria	p__Proteobacteria	c__Gammaproteobacteria	o__Xanthomonadales	f__Sinobacteraceae	g__	s__	1121144		k__Bacteria;p__Proteobacteria;c__Gammaproteobacteria;o__Xanthomonadales;f__Sinobacteraceae;g__;s__
OTU3628	0	7.05733e-05	0.000325253	0.00148856	0.00145985	0.000462635	0.000619033	0.00062474	0	0	0	6.25117e-05	0	0	9.914e-05	0	k__Bacteria	p__Proteobacteria	c__Gammaproteobacteria	o__Xanthomonadales	f__Sinobacteraceae	g__	s__	1094340		k__Bacteria;p__Proteobacteria;c__Gammaproteobacteria;o__Xanthomonadales;f__Sinobacteraceae;g__;s__
OTU6017	3.95726e-05	2.35244e-05	0.000151785	6.20232e-05	0	5.44277e-05	4.76179e-05	0.000115693	0	0	0	0	0	0	0	3.66993e-05	k__Bacteria	p__Proteobacteria	c__Gammaproteobacteria	o__Xanthomonadales	f__Sinobacteraceae	g__	s__	1053194		k__Bacteria;p__Proteobacteria;c__Gammaproteobacteria;o__Xanthomonadales;f__Sinobacteraceae;g__;s__
OTU3043	0.00124654	0.000588111	0.000932391	0.000372139	0	0	0.000142854	0.000115693	0	0	0	0	0	0	0	0	k__Bacteria	p__Proteobacteria	c__Gammaproteobacteria	o__Xanthomonadales	f__Sinobacteraceae	g__	s__	883548		k__Bacteria;p__Proteobacteria;c__Gammaproteobacteria;o__Xanthomonadales;f__Sinobacteraceae;g__;s__
OTU6065	0.00193906	0.00112917	0.00310074	0.00102338	8.98372e-05	0.000190497	0.00069046	0.00168911	0	5.38054e-05	0	2.08372e-05	0	0	0	0	k__Bacteria	p__Proteobacteria	c__Gammaproteobacteria	o__Xanthomonadales	f__Sinobacteraceae	g__	s__	339660		k__Bacteria;p__Proteobacteria;c__Gammaproteobacteria;o__Xanthomonadales;f__Sinobacteraceae;g__;s__
OTU9500	0.000118718	0.00042344	0.000151785	0.000372139	0.00188658	0.00070756	0.000523797	0.000671017	7.90972e-05	8.07081e-05	8.73534e-05	4.16745e-05	2.41645e-05	0.000310254	2.4785e-05	1.83496e-05	k__Bacteria	p__Proteobacteria	c__Gammaproteobacteria	o__Xanthomonadales	f__Sinobacteraceae	g__	s__	284413		k__Bacteria;p__Proteobacteria;c__Gammaproteobacteria;o__Xanthomonadales;f__Sinobacteraceae;g__;s__
OTU6770	0.000237436	0.000188195	2.16835e-05	0	0.000134756	0	2.3809e-05	6.94155e-05	0	0	0	0	0	0	0	0	k__Bacteria	p__Proteobacteria	c__Gammaproteobacteria	o__Xanthomonadales	f__Sinobacteraceae	g__	s__	247980		k__Bacteria;p__Proteobacteria;c__Gammaproteobacteria;o__Xanthomonadales;f__Sinobacteraceae;g__;s__
OTU1986	0	0.000117622	0.00117091	0.00018607	6.73779e-05	0.000244925	0.000547606	9.2554e-05	0	0.000134513	0	0	0	0	0	0	k__Bacteria	p__Proteobacteria	c__Gammaproteobacteria	o__Xanthomonadales	f__Sinobacteraceae	g__	s__	204786		k__Bacteria;p__Proteobacteria;c__Gammaproteobacteria;o__Xanthomonadales;f__Sinobacteraceae;g__;s__
OTU907	0.000296795	2.35244e-05	0.000151785	0.000155058	0	0	7.14269e-05	4.6277e-05	0	0	0	0	0	0	0	0	k__Bacteria	p__Proteobacteria	c__Gammaproteobacteria	o__Xanthomonadales	f__Sinobacteraceae	g__	s__	131337		k__Bacteria;p__Proteobacteria;c__Gammaproteobacteria;o__Xanthomonadales;f__Sinobacteraceae;g__;s__
OTU7270	3.95726e-05	0.000258769	0.000997441	9.30348e-05	0	5.44277e-05	0.000380943	0.000485909	2.63657e-05	5.38054e-05	0	0	0	2.58545e-05	2.4785e-05	0	k__Bacteria	p__Proteobacteria	c__Gammaproteobacteria	o__Xanthomonadales	f__Sinobacteraceae	g__	s__	18516		k__Bacteria;p__Proteobacteria;c__Gammaproteobacteria;o__Xanthomonadales;f__Sinobacteraceae;g__;s__
OTU134	0.000356154	0.000658684	8.6734e-05	9.30348e-05	2.24593e-05	0	0	0	0	0	0	0	0	0	0	0	k__Bacteria	p__Proteobacteria	c__Gammaproteobacteria	o__Xanthomonadales	f__Sinobacteraceae	g__Steroidobacter	s__	513055		k__Bacteria;p__Proteobacteria;c__Gammaproteobacteria;o__Xanthomonadales;f__Sinobacteraceae;g__Steroidobacter;s__
OTU6901	0.000732093	0.000893928	0.000498721	0.000217081	0	0	4.76179e-05	0.000300801	0	0	0	0	0	0	2.4785e-05	0	k__Bacteria	p__Proteobacteria	c__Gammaproteobacteria	o__Xanthomonadales	f__Sinobacteraceae	g__Steroidobacter	s__	365415		k__Bacteria;p__Proteobacteria;c__Gammaproteobacteria;o__Xanthomonadales;f__Sinobacteraceae;g__Steroidobacter;s__
OTU12012	0.000217649	7.05733e-05	4.3367e-05	0	0	0	4.76179e-05	4.6277e-05	0	0	0	0	0	0	0	0	k__Bacteria	p__Proteobacteria	c__Gammaproteobacteria	o__Xanthomonadales	f__Xanthomonadaceae	g__	s__	New.ReferenceOTU848		k__Bacteria;p__Proteobacteria;c__Gammaproteobacteria;o__Xanthomonadales;f__Xanthomonadaceae;g__;s__
OTU7081	3.95726e-05	0.000164671	0.00104081	0.000155058	0	0	0.000261899	0.000347078	0	2.69027e-05	0	0	0	2.58545e-05	0	0	k__Bacteria	p__Proteobacteria	c__Gammaproteobacteria	o__Xanthomonadales	f__Xanthomonadaceae	g__	s__	945478		k__Bacteria;p__Proteobacteria;c__Gammaproteobacteria;o__Xanthomonadales;f__Xanthomonadaceae;g__;s__
OTU189	0.000118718	9.40977e-05	0.000498721	3.10116e-05	0	0	0.000119045	0.000347078	0	8.07081e-05	2.18384e-05	0	0	0	0	1.83496e-05	k__Bacteria	p__Proteobacteria	c__Gammaproteobacteria	o__Xanthomonadales	f__Xanthomonadaceae	g__	s__	737110		k__Bacteria;p__Proteobacteria;c__Gammaproteobacteria;o__Xanthomonadales;f__Xanthomonadaceae;g__;s__
OTU1046	3.95726e-05	7.05733e-05	2.16835e-05	0.000155058	2.24593e-05	0	4.76179e-05	0.000115693	0	0	0	0	0	0	0	0	k__Bacteria	p__Proteobacteria	c__Gammaproteobacteria	o__Xanthomonadales	f__Xanthomonadaceae	g__	s__	360692		k__Bacteria;p__Proteobacteria;c__Gammaproteobacteria;o__Xanthomonadales;f__Xanthomonadaceae;g__;s__
OTU6100	1.97863e-05	9.40977e-05	0	0.000124046	2.24593e-05	0	9.52358e-05	0	0	0	0	0	0	0	0	0	k__Bacteria	p__Proteobacteria	c__Gammaproteobacteria	o__Xanthomonadales	f__Xanthomonadaceae	g__	s__	207813		k__Bacteria;p__Proteobacteria;c__Gammaproteobacteria;o__Xanthomonadales;f__Xanthomonadaceae;g__;s__
OTU2367	0.00112782	0.0031758	0.00320916	0.00223284	0.00186412	0.00405486	0.000333325	0.00148086	0.000210926	5.38054e-05	2.18384e-05	0	2.41645e-05	0.000180981	4.957e-05	0.000146797	k__Bacteria	p__Proteobacteria	c__Gammaproteobacteria	o__Xanthomonadales	f__Xanthomonadaceae	g__	s__	105699		k__Bacteria;p__Proteobacteria;c__Gammaproteobacteria;o__Xanthomonadales;f__Xanthomonadaceae;g__;s__
OTU11709	5.93589e-05	2.35244e-05	0	0	8.98372e-05	5.44277e-05	4.76179e-05	6.94155e-05	0	0	2.18384e-05	0	0	0	0	0	k__Bacteria	p__Tenericutes	c__Mollicutes	o__Anaeroplasmatales	f__Anaeroplasmataceae	g__Asteroleplasma	s__	New.ReferenceOTU42		k__Bacteria;p__Tenericutes;c__Mollicutes;o__Anaeroplasmatales;f__Anaeroplasmataceae;g__Asteroleplasma;s__
OTU52655	5.93589e-05	0.000117622	8.6734e-05	0	0.000247052	0	2.3809e-05	0	0	0	0	0	0	0	0	0	k__Bacteria	p__TM7	c__	o__	f__	g__	s__	New.CleanUp.ReferenceOTU252717		k__Bacteria;p__TM7;c__;o__;f__;g__;s__
OTU2819	9.89315e-05	7.05733e-05	4.3367e-05	6.20232e-05	0	0	9.52358e-05	0	0	0	0	0	0	0	0	0	k__Bacteria	p__TM7	c__SC3	o__	f__	g__	s__	113767		k__Bacteria;p__TM7;c__SC3;o__;f__;g__;s__
OTU681	3.95726e-05	0.000188195	4.3367e-05	3.10116e-05	0.000336889	0.000217711	0.000214281	9.2554e-05	0	0	4.36767e-05	0	0	0	0	1.83496e-05	k__Bacteria	p__TM7	c__SC3	o__	f__	g__	s__	100933		k__Bacteria;p__TM7;c__SC3;o__;f__;g__;s__
OTU53773	0.000138504	0.000188195	0	6.20232e-05	4.49186e-05	0	2.3809e-05	4.6277e-05	0	0	2.18384e-05	0	0	0	0	0	k__Bacteria	p__TM7	c__TM7-3	o__	f__	g__	s__	New.CleanUp.ReferenceOTU259660		k__Bacteria;p__TM7;c__TM7-3;o__;f__;g__;s__
OTU6544	0.000178077	0.000117622	4.3367e-05	0	8.98372e-05	2.72138e-05	0.000142854	2.31385e-05	0	0	0	0	0	0	0	1.83496e-05	k__Bacteria	p__TM7	c__TM7-3	o__	f__	g__	s__	4332061		k__Bacteria;p__TM7;c__TM7-3;o__;f__;g__;s__
OTU5553	3.95726e-05	7.05733e-05	4.3367e-05	0	0.000404267	0	0.000119045	6.94155e-05	0	0	0	0	0	2.58545e-05	0	7.33985e-05	k__Bacteria	p__TM7	c__TM7-3	o__	f__	g__	s__	520961		k__Bacteria;p__TM7;c__TM7-3;o__;f__;g__;s__
OTU10247	3.95726e-05	7.05733e-05	0.000238519	3.10116e-05	6.73779e-05	2.72138e-05	4.76179e-05	0	0	2.69027e-05	0	0	0	0	0	0	k__Bacteria	p__Verrucomicrobia	c__[Methylacidiphilae]	o__S-BQ2-57	f__	g__	s__	1104695		k__Bacteria;p__Verrucomicrobia;c__[Methylacidiphilae];o__S-BQ2-57;f__;g__;s__
OTU11633	5.93589e-05	0.000188195	2.16835e-05	0.000372139	0.000112296	0.000653132	7.14269e-05	0.000254524	0	0	0	0	0	0	0	0	k__Bacteria	p__Verrucomicrobia	c__[Pedosphaerae]	o__[Pedosphaerales]	f__	g__	s__	New.ReferenceOTU956		k__Bacteria;p__Verrucomicrobia;c__[Pedosphaerae];o__[Pedosphaerales];f__;g__;s__
OTU12330	0.000296795	0.00021172	0.000411987	0.000279104	0.00116788	0.000136069	0.000285707	0.000601601	0	0	0	0	0	0	0	0	k__Bacteria	p__Verrucomicrobia	c__[Pedosphaerae]	o__[Pedosphaerales]	f__	g__	s__	New.ReferenceOTU1050		k__Bacteria;p__Verrucomicrobia;c__[Pedosphaerae];o__[Pedosphaerales];f__;g__;s__
OTU26597	3.95726e-05	0.000258769	0.000130101	0.000124046	2.24593e-05	0	4.76179e-05	0.000138831	0	0	0	0	0	0	0	0	k__Bacteria	p__Verrucomicrobia	c__[Pedosphaerae]	o__[Pedosphaerales]	f__	g__	s__	New.CleanUp.ReferenceOTU88153		k__Bacteria;p__Verrucomicrobia;c__[Pedosphaerae];o__[Pedosphaerales];f__;g__;s__
OTU25927	3.95726e-05	7.05733e-05	0	0	2.24593e-05	0.00035378	9.52358e-05	0.000138831	0	0	2.18384e-05	0	0	0	0	0	k__Bacteria	p__Verrucomicrobia	c__[Pedosphaerae]	o__[Pedosphaerales]	f__	g__	s__	New.CleanUp.ReferenceOTU83815		k__Bacteria;p__Verrucomicrobia;c__[Pedosphaerae];o__[Pedosphaerales];f__;g__;s__
OTU65609	7.91452e-05	0	0.000346936	6.20232e-05	0.000134756	5.44277e-05	9.52358e-05	0.000370216	0	0	0	0	0	0	0	0	k__Bacteria	p__Verrucomicrobia	c__[Pedosphaerae]	o__[Pedosphaerales]	f__	g__	s__	New.CleanUp.ReferenceOTU334947		k__Bacteria;p__Verrucomicrobia;c__[Pedosphaerae];o__[Pedosphaerales];f__;g__;s__
OTU12948	0	0	0.000130101	9.30348e-05	2.24593e-05	2.72138e-05	0.000119045	0.000185108	0	0	0	0	0	0	0	0	k__Bacteria	p__Verrucomicrobia	c__[Pedosphaerae]	o__[Pedosphaerales]	f__	g__	s__	New.CleanUp.ReferenceOTU3268		k__Bacteria;p__Verrucomicrobia;c__[Pedosphaerae];o__[Pedosphaerales];f__;g__;s__
OTU8539	0	7.05733e-05	8.6734e-05	3.10116e-05	0	0	0.000119045	0.000185108	0	0	0	0	0	0	0	0	k__Bacteria	p__Verrucomicrobia	c__[Pedosphaerae]	o__[Pedosphaerales]	f__	g__	s__	4469043		k__Bacteria;p__Verrucomicrobia;c__[Pedosphaerae];o__[Pedosphaerales];f__;g__;s__
OTU10407	0.00104867	0.000823355	0.000758923	3.10116e-05	8.98372e-05	0.000136069	0.000166663	0.000277662	0	0	0	0	0	0	0	0	k__Bacteria	p__Verrucomicrobia	c__[Pedosphaerae]	o__[Pedosphaerales]	f__	g__	s__	4385099		k__Bacteria;p__Verrucomicrobia;c__[Pedosphaerae];o__[Pedosphaerales];f__;g__;s__
OTU9673	0.000613376	0.000282293	0.000325253	3.10116e-05	0	0	2.3809e-05	2.31385e-05	0	0	0	0	0	0	0	0	k__Bacteria	p__Verrucomicrobia	c__[Pedosphaerae]	o__[Pedosphaerales]	f__	g__	s__	915631		k__Bacteria;p__Verrucomicrobia;c__[Pedosphaerae];o__[Pedosphaerales];f__;g__;s__
OTU7539	1.97863e-05	0	0.000151785	9.30348e-05	2.24593e-05	0.000244925	0.000166663	6.94155e-05	0	0	2.18384e-05	0	0	0	0	0	k__Bacteria	p__Verrucomicrobia	c__[Pedosphaerae]	o__[Pedosphaerales]	f__	g__	s__	822571		k__Bacteria;p__Verrucomicrobia;c__[Pedosphaerae];o__[Pedosphaerales];f__;g__;s__
OTU8994	7.91452e-05	9.40977e-05	0.000108418	0.000248093	6.73779e-05	0	7.14269e-05	9.2554e-05	0	0	0	0	0	0	0	0	k__Bacteria	p__Verrucomicrobia	c__[Pedosphaerae]	o__[Pedosphaerales]	f__	g__	s__	248808		k__Bacteria;p__Verrucomicrobia;c__[Pedosphaerae];o__[Pedosphaerales];f__;g__;s__
OTU8989	5.93589e-05	0.000141147	6.50505e-05	6.20232e-05	2.24593e-05	2.72138e-05	2.3809e-05	6.94155e-05	0	0	2.18384e-05	0	0	0	0	0	k__Bacteria	p__Verrucomicrobia	c__[Pedosphaerae]	o__[Pedosphaerales]	f__	g__	s__	248805		k__Bacteria;p__Verrucomicrobia;c__[Pedosphaerae];o__[Pedosphaerales];f__;g__;s__
OTU6938	0.000178077	0.000164671	0.000411987	0.000155058	0	0	0	4.6277e-05	0	0	0	0	0	0	0	0	k__Bacteria	p__Verrucomicrobia	c__[Pedosphaerae]	o__[Pedosphaerales]	f__	g__	s__	239159		k__Bacteria;p__Verrucomicrobia;c__[Pedosphaerae];o__[Pedosphaerales];f__;g__;s__
OTU5635	0.000850811	2.35244e-05	2.16835e-05	3.10116e-05	4.49186e-05	0	0	0	2.63657e-05	0	0	0	0	0	0	0	k__Bacteria	p__Verrucomicrobia	c__[Pedosphaerae]	o__[Pedosphaerales]	f__	g__	s__	217929		k__Bacteria;p__Verrucomicrobia;c__[Pedosphaerae];o__[Pedosphaerales];f__;g__;s__
OTU10739	7.91452e-05	0.000141147	8.6734e-05	6.20232e-05	4.49186e-05	0	2.3809e-05	2.31385e-05	0	0	0	0	0	2.58545e-05	0	0	k__Bacteria	p__Verrucomicrobia	c__[Pedosphaerae]	o__[Pedosphaerales]	f__	g__	s__	82263		k__Bacteria;p__Verrucomicrobia;c__[Pedosphaerae];o__[Pedosphaerales];f__;g__;s__
OTU11717	1.97863e-05	9.40977e-05	2.16835e-05	0.000217081	2.24593e-05	0.000517063	2.3809e-05	0	0	0	0	0	4.8329e-05	0	0	1.83496e-05	k__Bacteria	p__Verrucomicrobia	c__[Pedosphaerae]	o__[Pedosphaerales]	f__[Pedosphaeraceae]	g__Pedosphaera	s__	New.ReferenceOTU108		k__Bacteria;p__Verrucomicrobia;c__[Pedosphaerae];o__[Pedosphaerales];f__[Pedosphaeraceae];g__Pedosphaera;s__
OTU12027	0.000356154	7.05733e-05	0.000151785	9.30348e-05	8.98372e-05	0	0	0	0	0	0	0	0	0	0	0	k__Bacteria	p__Verrucomicrobia	c__[Pedosphaerae]	o__[Pedosphaerales]	f__auto67_4W	g__	s__	New.ReferenceOTU835		k__Bacteria;p__Verrucomicrobia;c__[Pedosphaerae];o__[Pedosphaerales];f__auto67_4W;g__;s__
OTU4795	0.00124654	0.000893928	0.000823973	0.000372139	8.98372e-05	8.16415e-05	0.000190472	0.000555324	0	0.000107611	0	0	0	0	0	0	k__Bacteria	p__Verrucomicrobia	c__[Pedosphaerae]	o__[Pedosphaerales]	f__auto67_4W	g__	s__	1120116		k__Bacteria;p__Verrucomicrobia;c__[Pedosphaerae];o__[Pedosphaerales];f__auto67_4W;g__;s__
OTU10990	0.000613376	0.000258769	0.000195152	6.20232e-05	2.24593e-05	0	4.76179e-05	6.94155e-05	0	2.69027e-05	0	0	0	0	0	0	k__Bacteria	p__Verrucomicrobia	c__[Pedosphaerae]	o__[Pedosphaerales]	f__auto67_4W	g__	s__	1054055		k__Bacteria;p__Verrucomicrobia;c__[Pedosphaerae];o__[Pedosphaerales];f__auto67_4W;g__;s__
OTU5913	3.95726e-05	2.35244e-05	2.16835e-05	3.10116e-05	2.24593e-05	0.000108855	0.000142854	0.000254524	0	0	0	0	0	0	0	0	k__Bacteria	p__Verrucomicrobia	c__[Pedosphaerae]	o__[Pedosphaerales]	f__auto67_4W	g__	s__	533650		k__Bacteria;p__Verrucomicrobia;c__[Pedosphaerae];o__[Pedosphaerales];f__auto67_4W;g__;s__
OTU11277	0.000474871	0.000329342	0.000520404	0.00018607	0	0	7.14269e-05	0.000138831	0	0	0	0	0	0	0	0	k__Bacteria	p__Verrucomicrobia	c__[Pedosphaerae]	o__[Pedosphaerales]	f__auto67_4W	g__	s__	31253		k__Bacteria;p__Verrucomicrobia;c__[Pedosphaerae];o__[Pedosphaerales];f__auto67_4W;g__;s__
OTU12036	0	2.35244e-05	0.000173468	0.000217081	0	0.000136069	0.000119045	0.000347078	0	0	0	0	0	0	0	0	k__Bacteria	p__Verrucomicrobia	c__[Pedosphaerae]	o__[Pedosphaerales]	f__Ellin515	g__	s__	New.ReferenceOTU935		k__Bacteria;p__Verrucomicrobia;c__[Pedosphaerae];o__[Pedosphaerales];f__Ellin515;g__;s__
OTU22482	0.000178077	7.05733e-05	0.000281886	3.10116e-05	0	0	0	0.000300801	0	0	0	0	0	0	0	0	k__Bacteria	p__Verrucomicrobia	c__[Pedosphaerae]	o__[Pedosphaerales]	f__Ellin515	g__	s__	New.CleanUp.ReferenceOTU61700		k__Bacteria;p__Verrucomicrobia;c__[Pedosphaerae];o__[Pedosphaerales];f__Ellin515;g__;s__
OTU61393	3.95726e-05	4.70489e-05	0.000108418	0.000155058	2.24593e-05	0	7.14269e-05	0.000300801	0	0	0	0	0	0	0	0	k__Bacteria	p__Verrucomicrobia	c__[Pedosphaerae]	o__[Pedosphaerales]	f__Ellin515	g__	s__	New.CleanUp.ReferenceOTU307563		k__Bacteria;p__Verrucomicrobia;c__[Pedosphaerae];o__[Pedosphaerales];f__Ellin515;g__;s__
OTU49628	0.000178077	7.05733e-05	0.000151785	6.20232e-05	0	0	0	6.94155e-05	0	0	0	0	0	0	0	0	k__Bacteria	p__Verrucomicrobia	c__[Pedosphaerae]	o__[Pedosphaerales]	f__Ellin515	g__	s__	New.CleanUp.ReferenceOTU234042		k__Bacteria;p__Verrucomicrobia;c__[Pedosphaerae];o__[Pedosphaerales];f__Ellin515;g__;s__
OTU948	0.00037594	0.00602225	0.00143111	0.00111642	0.000134756	0.000136069	7.14269e-05	0.000439632	0	0	0	0	0	0	0	0	k__Bacteria	p__Verrucomicrobia	c__[Pedosphaerae]	o__[Pedosphaerales]	f__Ellin515	g__	s__	4447718		k__Bacteria;p__Verrucomicrobia;c__[Pedosphaerae];o__[Pedosphaerales];f__Ellin515;g__;s__
OTU3513	0.000118718	9.40977e-05	0.000108418	3.10116e-05	2.24593e-05	0.00100691	0.000214281	0.000277662	0	0	2.18384e-05	0	0	0	0	3.66993e-05	k__Bacteria	p__Verrucomicrobia	c__[Pedosphaerae]	o__[Pedosphaerales]	f__Ellin515	g__	s__	4327914		k__Bacteria;p__Verrucomicrobia;c__[Pedosphaerae];o__[Pedosphaerales];f__Ellin515;g__;s__
OTU876	0	0	0.000195152	9.30348e-05	2.24593e-05	0	7.14269e-05	0.000185108	0	0	0	0	0	0	0	0	k__Bacteria	p__Verrucomicrobia	c__[Pedosphaerae]	o__[Pedosphaerales]	f__Ellin515	g__	s__	3271423		k__Bacteria;p__Verrucomicrobia;c__[Pedosphaerae];o__[Pedosphaerales];f__Ellin515;g__;s__
OTU10227	0.000356154	4.70489e-05	0.000108418	0	2.24593e-05	0.000435422	4.76179e-05	2.31385e-05	0	0	0	0	0	0	0	0	k__Bacteria	p__Verrucomicrobia	c__[Pedosphaerae]	o__[Pedosphaerales]	f__Ellin515	g__	s__	3232050		k__Bacteria;p__Verrucomicrobia;c__[Pedosphaerae];o__[Pedosphaerales];f__Ellin515;g__;s__
OTU627	0.000138504	0.000258769	0.00106249	0.00058922	0.000381808	0.000163283	0.000190472	0.000115693	0	0	0	0	0	0	0	1.83496e-05	k__Bacteria	p__Verrucomicrobia	c__[Pedosphaerae]	o__[Pedosphaerales]	f__Ellin515	g__	s__	1108930		k__Bacteria;p__Verrucomicrobia;c__[Pedosphaerae];o__[Pedosphaerales];f__Ellin515;g__;s__
OTU8119	0.000474871	0.00042344	0.000693872	0.000868325	0.000179674	0.0015784	0.000190472	0.000416493	0	0	0	0	0	0	0	3.66993e-05	k__Bacteria	p__Verrucomicrobia	c__[Pedosphaerae]	o__[Pedosphaerales]	f__Ellin515	g__	s__	1108431		k__Bacteria;p__Verrucomicrobia;c__[Pedosphaerae];o__[Pedosphaerales];f__Ellin515;g__;s__
OTU5999	0	0	0.000303569	0.000279104	0.000134756	0.000163283	0.000285707	0.000578463	0	0	0	0	0	0	0	0	k__Bacteria	p__Verrucomicrobia	c__[Pedosphaerae]	o__[Pedosphaerales]	f__Ellin515	g__	s__	1104594		k__Bacteria;p__Verrucomicrobia;c__[Pedosphaerae];o__[Pedosphaerales];f__Ellin515;g__;s__
OTU3725	0	2.35244e-05	2.16835e-05	0.00018607	4.49186e-05	8.16415e-05	9.52358e-05	0.000323939	0	0	0	0	0	0	0	0	k__Bacteria	p__Verrucomicrobia	c__[Pedosphaerae]	o__[Pedosphaerales]	f__Ellin515	g__	s__	1096310		k__Bacteria;p__Verrucomicrobia;c__[Pedosphaerae];o__[Pedosphaerales];f__Ellin515;g__;s__
OTU3729	1.97863e-05	0.000117622	8.6734e-05	3.10116e-05	0.000539023	0.000489849	0.000547606	0.000323939	0	0	2.18384e-05	0	0	2.58545e-05	0	0	k__Bacteria	p__Verrucomicrobia	c__[Pedosphaerae]	o__[Pedosphaerales]	f__Ellin515	g__	s__	1028706		k__Bacteria;p__Verrucomicrobia;c__[Pedosphaerae];o__[Pedosphaerales];f__Ellin515;g__;s__
OTU1519	0.000217649	4.70489e-05	0	0.000155058	4.49186e-05	2.72138e-05	2.3809e-05	0.000439632	0	0	0	0	0	0	0	0	k__Bacteria	p__Verrucomicrobia	c__[Pedosphaerae]	o__[Pedosphaerales]	f__Ellin515	g__	s__	999038		k__Bacteria;p__Verrucomicrobia;c__[Pedosphaerae];o__[Pedosphaerales];f__Ellin515;g__;s__
OTU10697	1.97863e-05	4.70489e-05	0.000195152	0.000496186	0.000157215	0	0.000119045	0.000277662	0	0	0	0	0	0	0	0	k__Bacteria	p__Verrucomicrobia	c__[Pedosphaerae]	o__[Pedosphaerales]	f__Ellin515	g__	s__	957505		k__Bacteria;p__Verrucomicrobia;c__[Pedosphaerae];o__[Pedosphaerales];f__Ellin515;g__;s__
OTU1190	0	0.000164671	4.3367e-05	0	0	0.000571491	4.76179e-05	4.6277e-05	0	0	0	0	0	0	0	1.83496e-05	k__Bacteria	p__Verrucomicrobia	c__[Pedosphaerae]	o__[Pedosphaerales]	f__Ellin515	g__	s__	338969		k__Bacteria;p__Verrucomicrobia;c__[Pedosphaerae];o__[Pedosphaerales];f__Ellin515;g__;s__
OTU4733	0.000415512	0.000141147	4.3367e-05	0.00018607	8.98372e-05	8.16415e-05	4.76179e-05	6.94155e-05	0	0	0	0	0	0	0	0	k__Bacteria	p__Verrucomicrobia	c__[Pedosphaerae]	o__[Pedosphaerales]	f__Ellin515	g__	s__	308202		k__Bacteria;p__Verrucomicrobia;c__[Pedosphaerae];o__[Pedosphaerales];f__Ellin515;g__;s__
OTU202	9.89315e-05	0.000117622	0.000130101	0.000124046	0.000112296	8.16415e-05	0.000166663	2.31385e-05	0	0	2.18384e-05	0	0	0	0	0	k__Bacteria	p__Verrucomicrobia	c__[Pedosphaerae]	o__[Pedosphaerales]	f__Ellin515	g__	s__	224253		k__Bacteria;p__Verrucomicrobia;c__[Pedosphaerae];o__[Pedosphaerales];f__Ellin515;g__;s__
OTU6644	5.93589e-05	0	8.6734e-05	0.00018607	0	0	9.52358e-05	9.2554e-05	0	0	0	0	0	0	0	0	k__Bacteria	p__Verrucomicrobia	c__[Pedosphaerae]	o__[Pedosphaerales]	f__Ellin515	g__	s__	223808		k__Bacteria;p__Verrucomicrobia;c__[Pedosphaerae];o__[Pedosphaerales];f__Ellin515;g__;s__
OTU5539	0.000178077	0.000305818	0.000542088	0.000558209	0.000202134	0.000163283	0.000214281	0.000717294	0	0	0	0	0	0	0	0	k__Bacteria	p__Verrucomicrobia	c__[Pedosphaerae]	o__[Pedosphaerales]	f__Ellin515	g__	s__	221212		k__Bacteria;p__Verrucomicrobia;c__[Pedosphaerae];o__[Pedosphaerales];f__Ellin515;g__;s__
OTU3929	0.00015829	0.000164671	0.000303569	0.00108541	0.000336889	2.72138e-05	0.000285707	0.000370216	0	0	0	0	0	0	0	0	k__Bacteria	p__Verrucomicrobia	c__[Pedosphaerae]	o__[Pedosphaerales]	f__Ellin515	g__	s__	220368		k__Bacteria;p__Verrucomicrobia;c__[Pedosphaerae];o__[Pedosphaerales];f__Ellin515;g__;s__
OTU2269	0.0010091	0.00268179	0.00186478	0.00282206	0.00190904	0.00484406	0.000261899	0.000254524	0	2.69027e-05	0	0	0	0	0	5.50489e-05	k__Bacteria	p__Verrucomicrobia	c__[Pedosphaerae]	o__[Pedosphaerales]	f__Ellin515	g__	s__	217822		k__Bacteria;p__Verrucomicrobia;c__[Pedosphaerae];o__[Pedosphaerales];f__Ellin515;g__;s__
OTU10871	0	0	8.6734e-05	9.30348e-05	4.49186e-05	0.000163283	2.3809e-05	0.000347078	0	0	0	0	0	0	0	0	k__Bacteria	p__Verrucomicrobia	c__[Pedosphaerae]	o__[Pedosphaerales]	f__Ellin515	g__	s__	210788		k__Bacteria;p__Verrucomicrobia;c__[Pedosphaerae];o__[Pedosphaerales];f__Ellin515;g__;s__
OTU3364	0.000316581	0.000446964	6.50505e-05	0.00018607	0.000179674	5.44277e-05	0.000119045	0.000138831	0	0	0	0	0	0	0	0	k__Bacteria	p__Verrucomicrobia	c__[Pedosphaerae]	o__[Pedosphaerales]	f__Ellin515	g__	s__	137061		k__Bacteria;p__Verrucomicrobia;c__[Pedosphaerae];o__[Pedosphaerales];f__Ellin515;g__;s__
OTU9944	3.95726e-05	2.35244e-05	0.000151785	6.20232e-05	4.49186e-05	2.72138e-05	0.000190472	0.000578463	0	0	0	0	0	0	0	0	k__Bacteria	p__Verrucomicrobia	c__[Pedosphaerae]	o__[Pedosphaerales]	f__Ellin515	g__	s__	102024		k__Bacteria;p__Verrucomicrobia;c__[Pedosphaerae];o__[Pedosphaerales];f__Ellin515;g__;s__
OTU11934	0.000870598	0.000752782	0.00121428	0.000837313	0.000830994	0.000108855	0.00069046	0.000647878	0	0	0.00013103	0	0	5.1709e-05	0	1.83496e-05	k__Bacteria	p__Verrucomicrobia	c__[Pedosphaerae]	o__[Pedosphaerales]	f__Ellin517	g__	s__	New.ReferenceOTU1073		k__Bacteria;p__Verrucomicrobia;c__[Pedosphaerae];o__[Pedosphaerales];f__Ellin517;g__;s__
OTU8445	1.97863e-05	9.40977e-05	0.000477037	0.000403151	0	5.44277e-05	4.76179e-05	0.000416493	0	2.69027e-05	0	0	0	0	0	1.83496e-05	k__Bacteria	p__Verrucomicrobia	c__[Pedosphaerae]	o__[Pedosphaerales]	f__Ellin517	g__	s__	1059652		k__Bacteria;p__Verrucomicrobia;c__[Pedosphaerae];o__[Pedosphaerales];f__Ellin517;g__;s__
OTU9250	0.000296795	9.40977e-05	0.000108418	6.20232e-05	0	0	2.3809e-05	4.6277e-05	0	0	0	0	0	0	0	0	k__Bacteria	p__Verrucomicrobia	c__[Pedosphaerae]	o__[Pedosphaerales]	f__Ellin517	g__	s__	922183		k__Bacteria;p__Verrucomicrobia;c__[Pedosphaerae];o__[Pedosphaerales];f__Ellin517;g__;s__
OTU51146	0	7.05733e-05	0.000108418	9.30348e-05	0	5.44277e-05	4.76179e-05	9.2554e-05	0	0	0	0	0	0	0	0	k__Bacteria	p__Verrucomicrobia	c__[Pedosphaerae]	o__[Pedosphaerales]	f__R4-41B	g__	s__	New.CleanUp.ReferenceOTU243401		k__Bacteria;p__Verrucomicrobia;c__[Pedosphaerae];o__[Pedosphaerales];f__R4-41B;g__;s__
OTU11722	0.000178077	0.00042344	0.000585455	0.000434162	0	0	0.000190472	0.000370216	0	0	0	0	0	0	0	0	k__Bacteria	p__Verrucomicrobia	c__[Spartobacteria]	o__[Chthoniobacterales]	f__[Chthoniobacteraceae]	g__	s__	New.ReferenceOTU514		k__Bacteria;p__Verrucomicrobia;c__[Spartobacteria];o__[Chthoniobacterales];f__[Chthoniobacteraceae];g__;s__
OTU12362	0.000672734	0.000376391	0.000715556	0.000868325	0.000988209	0.000326566	0.00090474	0.000971817	0	8.07081e-05	0	0	0	0	0	0	k__Bacteria	p__Verrucomicrobia	c__[Spartobacteria]	o__[Chthoniobacterales]	f__[Chthoniobacteraceae]	g__	s__	New.ReferenceOTU169		k__Bacteria;p__Verrucomicrobia;c__[Spartobacteria];o__[Chthoniobacterales];f__[Chthoniobacteraceae];g__;s__
OTU20486	3.95726e-05	0	0.000151785	3.10116e-05	0.000202134	2.72138e-05	2.3809e-05	0.000138831	0	2.69027e-05	2.18384e-05	0	0	0	0	0	k__Bacteria	p__Verrucomicrobia	c__[Spartobacteria]	o__[Chthoniobacterales]	f__[Chthoniobacteraceae]	g__	s__	New.CleanUp.ReferenceOTU49350		k__Bacteria;p__Verrucomicrobia;c__[Spartobacteria];o__[Chthoniobacterales];f__[Chthoniobacteraceae];g__;s__
OTU2248	0.000811239	7.05733e-05	0.000563771	0.00058922	0	0	9.52358e-05	0.000254524	0	0	0	0	0	0	0	0	k__Bacteria	p__Verrucomicrobia	c__[Spartobacteria]	o__[Chthoniobacterales]	f__[Chthoniobacteraceae]	g__	s__	553058		k__Bacteria;p__Verrucomicrobia;c__[Spartobacteria];o__[Chthoniobacterales];f__[Chthoniobacteraceae];g__;s__
OTU3376	0.000554017	0.000446964	0.00121428	0.000372139	0	0	7.14269e-05	0.000185108	0	0	0	0	0	0	0	0	k__Bacteria	p__Verrucomicrobia	c__[Spartobacteria]	o__[Chthoniobacterales]	f__[Chthoniobacteraceae]	g__	s__	512674		k__Bacteria;p__Verrucomicrobia;c__[Spartobacteria];o__[Chthoniobacterales];f__[Chthoniobacteraceae];g__;s__
OTU11201	0	4.70489e-05	2.16835e-05	0.000248093	0.000202134	5.44277e-05	0.000261899	9.2554e-05	0	0	0	0	0	0	0	0	k__Bacteria	p__Verrucomicrobia	c__[Spartobacteria]	o__[Chthoniobacterales]	f__[Chthoniobacteraceae]	g__CandidatusXiphinematobacter	s__	4358275		k__Bacteria;p__Verrucomicrobia;c__[Spartobacteria];o__[Chthoniobacterales];f__[Chthoniobacteraceae];g__CandidatusXiphinematobacter;s__
OTU1445	0.0347843	0.00355219	0.000563771	0.00291509	0.00062886	2.72138e-05	0.000357134	0.00143459	0	0	0	0	0	0	0	0	k__Bacteria	p__Verrucomicrobia	c__[Spartobacteria]	o__[Chthoniobacterales]	f__[Chthoniobacteraceae]	g__CandidatusXiphinematobacter	s__	4350694		k__Bacteria;p__Verrucomicrobia;c__[Spartobacteria];o__[Chthoniobacterales];f__[Chthoniobacteraceae];g__CandidatusXiphinematobacter;s__
OTU2857	0.000455085	0.00124679	0.00121428	0.0034733	0.00624368	0.00155119	0.00283327	0.00168911	0	0.000107611	0	0	0	0	0	1.83496e-05	k__Bacteria	p__Verrucomicrobia	c__[Spartobacteria]	o__[Chthoniobacterales]	f__[Chthoniobacteraceae]	g__CandidatusXiphinematobacter	s__	630306		k__Bacteria;p__Verrucomicrobia;c__[Spartobacteria];o__[Chthoniobacterales];f__[Chthoniobacteraceae];g__CandidatusXiphinematobacter;s__
OTU5934	0	0	0	0.000434162	0.000381808	0.000299352	0.000166663	0.000740432	0	0	0	0	0	0	0	0	k__Bacteria	p__Verrucomicrobia	c__[Spartobacteria]	o__[Chthoniobacterales]	f__[Chthoniobacteraceae]	g__CandidatusXiphinematobacter	s__	244491		k__Bacteria;p__Verrucomicrobia;c__[Spartobacteria];o__[Chthoniobacterales];f__[Chthoniobacteraceae];g__CandidatusXiphinematobacter;s__
OTU9423	0.000217649	0.000870404	0.000672189	0.0021398	0.00128018	0.00119741	0.00135711	0.00159656	0	0	0	0	0	0	0	0	k__Bacteria	p__Verrucomicrobia	c__[Spartobacteria]	o__[Chthoniobacterales]	f__[Chthoniobacteraceae]	g__CandidatusXiphinematobacter	s__	206632		k__Bacteria;p__Verrucomicrobia;c__[Spartobacteria];o__[Chthoniobacterales];f__[Chthoniobacteraceae];g__CandidatusXiphinematobacter;s__
OTU64720	0.000138504	0.00021172	6.50505e-05	0.000248093	6.73779e-05	0.000136069	0.000142854	0.000208247	0	0	0	0	0	0	0	1.83496e-05	k__Bacteria	p__Verrucomicrobia	c__[Spartobacteria]	o__[Chthoniobacterales]	f__[Chthoniobacteraceae]	g__Chthoniobacter	s__	New.CleanUp.ReferenceOTU329290		k__Bacteria;p__Verrucomicrobia;c__[Spartobacteria];o__[Chthoniobacterales];f__[Chthoniobacteraceae];g__Chthoniobacter;s__
OTU6453	1.97863e-05	0.000117622	0.000260202	0.000124046	8.98372e-05	2.72138e-05	0.000261899	0.00016197	0	2.69027e-05	2.18384e-05	0	0	0	0	1.83496e-05	k__Bacteria	p__Verrucomicrobia	c__[Spartobacteria]	o__[Chthoniobacterales]	f__[Chthoniobacteraceae]	g__Chthoniobacter	s__	1049393		k__Bacteria;p__Verrucomicrobia;c__[Spartobacteria];o__[Chthoniobacterales];f__[Chthoniobacteraceae];g__Chthoniobacter;s__
OTU1847	5.93589e-05	2.35244e-05	6.50505e-05	0	2.24593e-05	8.16415e-05	4.76179e-05	4.6277e-05	0	0	0	0	0	0	2.4785e-05	0	k__Bacteria	p__Verrucomicrobia	c__[Spartobacteria]	o__[Chthoniobacterales]	f__[Chthoniobacteraceae]	g__Chthoniobacter	s__	325609		k__Bacteria;p__Verrucomicrobia;c__[Spartobacteria];o__[Chthoniobacterales];f__[Chthoniobacteraceae];g__Chthoniobacter;s__
OTU12159	0.00140483	0.00145851	0.000195152	0.00018607	0.000494104	0	0.000119045	4.6277e-05	0	0	0	0	0	0	0	0	k__Bacteria	p__Verrucomicrobia	c__[Spartobacteria]	o__[Chthoniobacterales]	f__[Chthoniobacteraceae]	g__DA101	s__	New.ReferenceOTU974		k__Bacteria;p__Verrucomicrobia;c__[Spartobacteria];o__[Chthoniobacterales];f__[Chthoniobacteraceae];g__DA101;s__
OTU11899	0.000217649	9.40977e-05	0.00036862	0.000403151	0.00031443	2.72138e-05	0.000523797	0.000555324	0	0	0	0	0	0	0	0	k__Bacteria	p__Verrucomicrobia	c__[Spartobacteria]	o__[Chthoniobacterales]	f__[Chthoniobacteraceae]	g__DA101	s__	New.ReferenceOTU967		k__Bacteria;p__Verrucomicrobia;c__[Spartobacteria];o__[Chthoniobacterales];f__[Chthoniobacteraceae];g__DA101;s__
OTU11961	0	0.000258769	2.16835e-05	0	6.73779e-05	0.000244925	0.000261899	0	2.63657e-05	0	0	0	0	0	0	0	k__Bacteria	p__Verrucomicrobia	c__[Spartobacteria]	o__[Chthoniobacterales]	f__[Chthoniobacteraceae]	g__DA101	s__	New.ReferenceOTU696		k__Bacteria;p__Verrucomicrobia;c__[Spartobacteria];o__[Chthoniobacterales];f__[Chthoniobacteraceae];g__DA101;s__
OTU12390	0.000257222	0.000329342	0.000477037	0.000527197	0.000269512	5.44277e-05	0.00126187	0.00111065	0	0	0	0	0	0	0	0	k__Bacteria	p__Verrucomicrobia	c__[Spartobacteria]	o__[Chthoniobacterales]	f__[Chthoniobacteraceae]	g__DA101	s__	New.ReferenceOTU467		k__Bacteria;p__Verrucomicrobia;c__[Spartobacteria];o__[Chthoniobacterales];f__[Chthoniobacteraceae];g__DA101;s__
OTU11984	0.000474871	0.0010586	0.000780606	0.000651244	0.00177428	0.000326566	0.000571415	0.000416493	0	0	0	0	0	0	0	0	k__Bacteria	p__Verrucomicrobia	c__[Spartobacteria]	o__[Chthoniobacterales]	f__[Chthoniobacteraceae]	g__DA101	s__	New.ReferenceOTU440		k__Bacteria;p__Verrucomicrobia;c__[Spartobacteria];o__[Chthoniobacterales];f__[Chthoniobacteraceae];g__DA101;s__
OTU11805	0	2.35244e-05	4.3367e-05	0	6.73779e-05	0.00125184	0.000357134	0	0	0	0	0	0	0	0	0	k__Bacteria	p__Verrucomicrobia	c__[Spartobacteria]	o__[Chthoniobacterales]	f__[Chthoniobacteraceae]	g__DA101	s__	New.ReferenceOTU1035		k__Bacteria;p__Verrucomicrobia;c__[Spartobacteria];o__[Chthoniobacterales];f__[Chthoniobacteraceae];g__DA101;s__
OTU12210	0.000118718	0.000141147	0.000628822	0.0074738	0.00714206	0.000163283	0.00359515	0.00610857	0	0	0	0	0	0	0	0	k__Bacteria	p__Verrucomicrobia	c__[Spartobacteria]	o__[Chthoniobacterales]	f__[Chthoniobacteraceae]	g__DA101	s__	New.ReferenceOTU1014		k__Bacteria;p__Verrucomicrobia;c__[Spartobacteria];o__[Chthoniobacterales];f__[Chthoniobacteraceae];g__DA101;s__
OTU20226	9.89315e-05	0.000117622	0.000108418	6.20232e-05	6.73779e-05	2.72138e-05	7.14269e-05	9.2554e-05	0	0	0	0	0	0	0	0	k__Bacteria	p__Verrucomicrobia	c__[Spartobacteria]	o__[Chthoniobacterales]	f__[Chthoniobacteraceae]	g__DA101	s__	New.CleanUp.ReferenceOTU47693		k__Bacteria;p__Verrucomicrobia;c__[Spartobacteria];o__[Chthoniobacterales];f__[Chthoniobacteraceae];g__DA101;s__
OTU63201	7.91452e-05	2.35244e-05	2.16835e-05	0.00018607	2.24593e-05	0	0.000166663	2.31385e-05	0	0	0	0	0	0	0	0	k__Bacteria	p__Verrucomicrobia	c__[Spartobacteria]	o__[Chthoniobacterales]	f__[Chthoniobacteraceae]	g__DA101	s__	New.CleanUp.ReferenceOTU319035		k__Bacteria;p__Verrucomicrobia;c__[Spartobacteria];o__[Chthoniobacterales];f__[Chthoniobacteraceae];g__DA101;s__
OTU54050	0	0	4.3367e-05	0	2.24593e-05	0.000108855	0.000261899	6.94155e-05	0	0	2.18384e-05	0	0	0	0	0	k__Bacteria	p__Verrucomicrobia	c__[Spartobacteria]	o__[Chthoniobacterales]	f__[Chthoniobacteraceae]	g__DA101	s__	New.CleanUp.ReferenceOTU261367		k__Bacteria;p__Verrucomicrobia;c__[Spartobacteria];o__[Chthoniobacterales];f__[Chthoniobacteraceae];g__DA101;s__
OTU51350	1.97863e-05	4.70489e-05	0.000130101	6.20232e-05	0.000134756	0.000190497	0.000214281	0.000115693	2.63657e-05	0	6.55151e-05	0	0	0	4.957e-05	9.17482e-05	k__Bacteria	p__Verrucomicrobia	c__[Spartobacteria]	o__[Chthoniobacterales]	f__[Chthoniobacteraceae]	g__DA101	s__	New.CleanUp.ReferenceOTU244665		k__Bacteria;p__Verrucomicrobia;c__[Spartobacteria];o__[Chthoniobacterales];f__[Chthoniobacteraceae];g__DA101;s__
OTU47544	0.000474871	0.000658684	0.00036862	3.10116e-05	0	2.72138e-05	9.52358e-05	0.000138831	0	0	0	0	0	0	0	0	k__Bacteria	p__Verrucomicrobia	c__[Spartobacteria]	o__[Chthoniobacterales]	f__[Chthoniobacteraceae]	g__DA101	s__	New.CleanUp.ReferenceOTU221167		k__Bacteria;p__Verrucomicrobia;c__[Spartobacteria];o__[Chthoniobacterales];f__[Chthoniobacteraceae];g__DA101;s__
OTU37270	0	0	2.16835e-05	3.10116e-05	2.24593e-05	0.000108855	0.000142854	4.6277e-05	0	0	0	0	0	0	0	0	k__Bacteria	p__Verrucomicrobia	c__[Spartobacteria]	o__[Chthoniobacterales]	f__[Chthoniobacteraceae]	g__DA101	s__	New.CleanUp.ReferenceOTU158175		k__Bacteria;p__Verrucomicrobia;c__[Spartobacteria];o__[Chthoniobacterales];f__[Chthoniobacteraceae];g__DA101;s__
OTU29920	3.95726e-05	0.000141147	0	0	0.000202134	0	7.14269e-05	9.2554e-05	0	0	0	0	0	0	0	0	k__Bacteria	p__Verrucomicrobia	c__[Spartobacteria]	o__[Chthoniobacterales]	f__[Chthoniobacteraceae]	g__DA101	s__	New.CleanUp.ReferenceOTU110075		k__Bacteria;p__Verrucomicrobia;c__[Spartobacteria];o__[Chthoniobacterales];f__[Chthoniobacteraceae];g__DA101;s__
OTU6609	3.95726e-05	2.35244e-05	0.000130101	0.000682255	0.000291971	2.72138e-05	0.00045237	0.000277662	0	0	0	0	0	0	0	0	k__Bacteria	p__Verrucomicrobia	c__[Spartobacteria]	o__[Chthoniobacterales]	f__[Chthoniobacteraceae]	g__DA101	s__	4471583		k__Bacteria;p__Verrucomicrobia;c__[Spartobacteria];o__[Chthoniobacterales];f__[Chthoniobacteraceae];g__DA101;s__
OTU9652	0	2.35244e-05	0.000108418	0.000124046	4.49186e-05	2.72138e-05	7.14269e-05	6.94155e-05	0	0	0	0	0	0	0	0	k__Bacteria	p__Verrucomicrobia	c__[Spartobacteria]	o__[Chthoniobacterales]	f__[Chthoniobacteraceae]	g__DA101	s__	4457032		k__Bacteria;p__Verrucomicrobia;c__[Spartobacteria];o__[Chthoniobacterales];f__[Chthoniobacteraceae];g__DA101;s__
[truncated: 962 more rows]

## Sheet: Hatchlands vs Richmond
Group	1H-H	3H-H	4H-H	5H-H	1AOD-H	2AOD-H	3AOD-H	5AOD-H	1H-R	2H-R	4H-R	5H-R	1AOD-R	2AOD-R	3AOD-R	5AOD-R	Kingdom	Phylum	Class	Order	Family	Genus	Species	OTU	Kingdom;Phylum;Class;Order;Family;Genus;Species
[truncated: 2,842 more rows]
